# Supplementary material for: Improved large-scale prediction of growth inhibition patterns using the NCI60 cancer cell line panel
Source: PubMed Central journal article supplement (PMC4681992; doi:10.1093/bioinformatics/btv529), 2015-09-08

# NSC 105014, Cladribine (Interpolation)

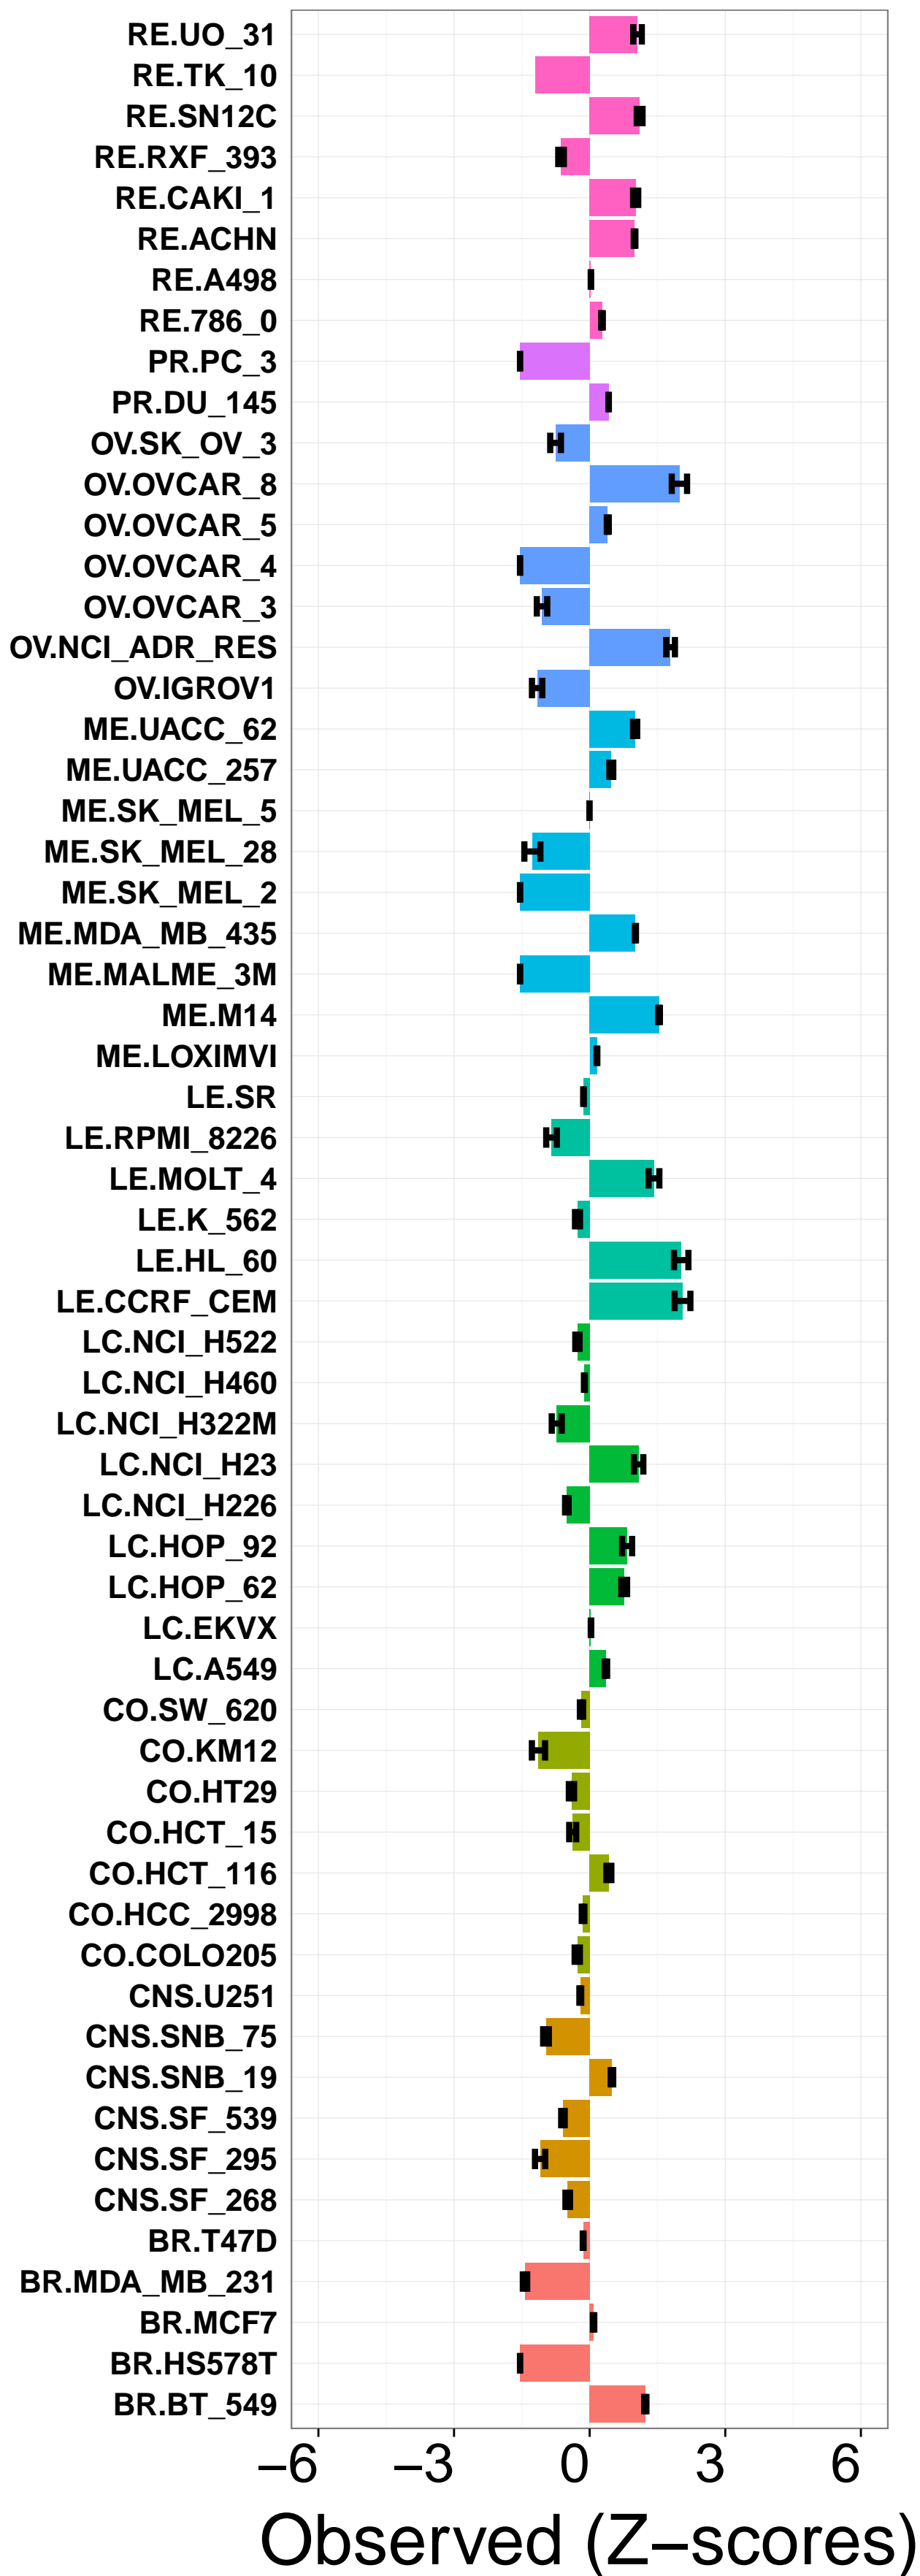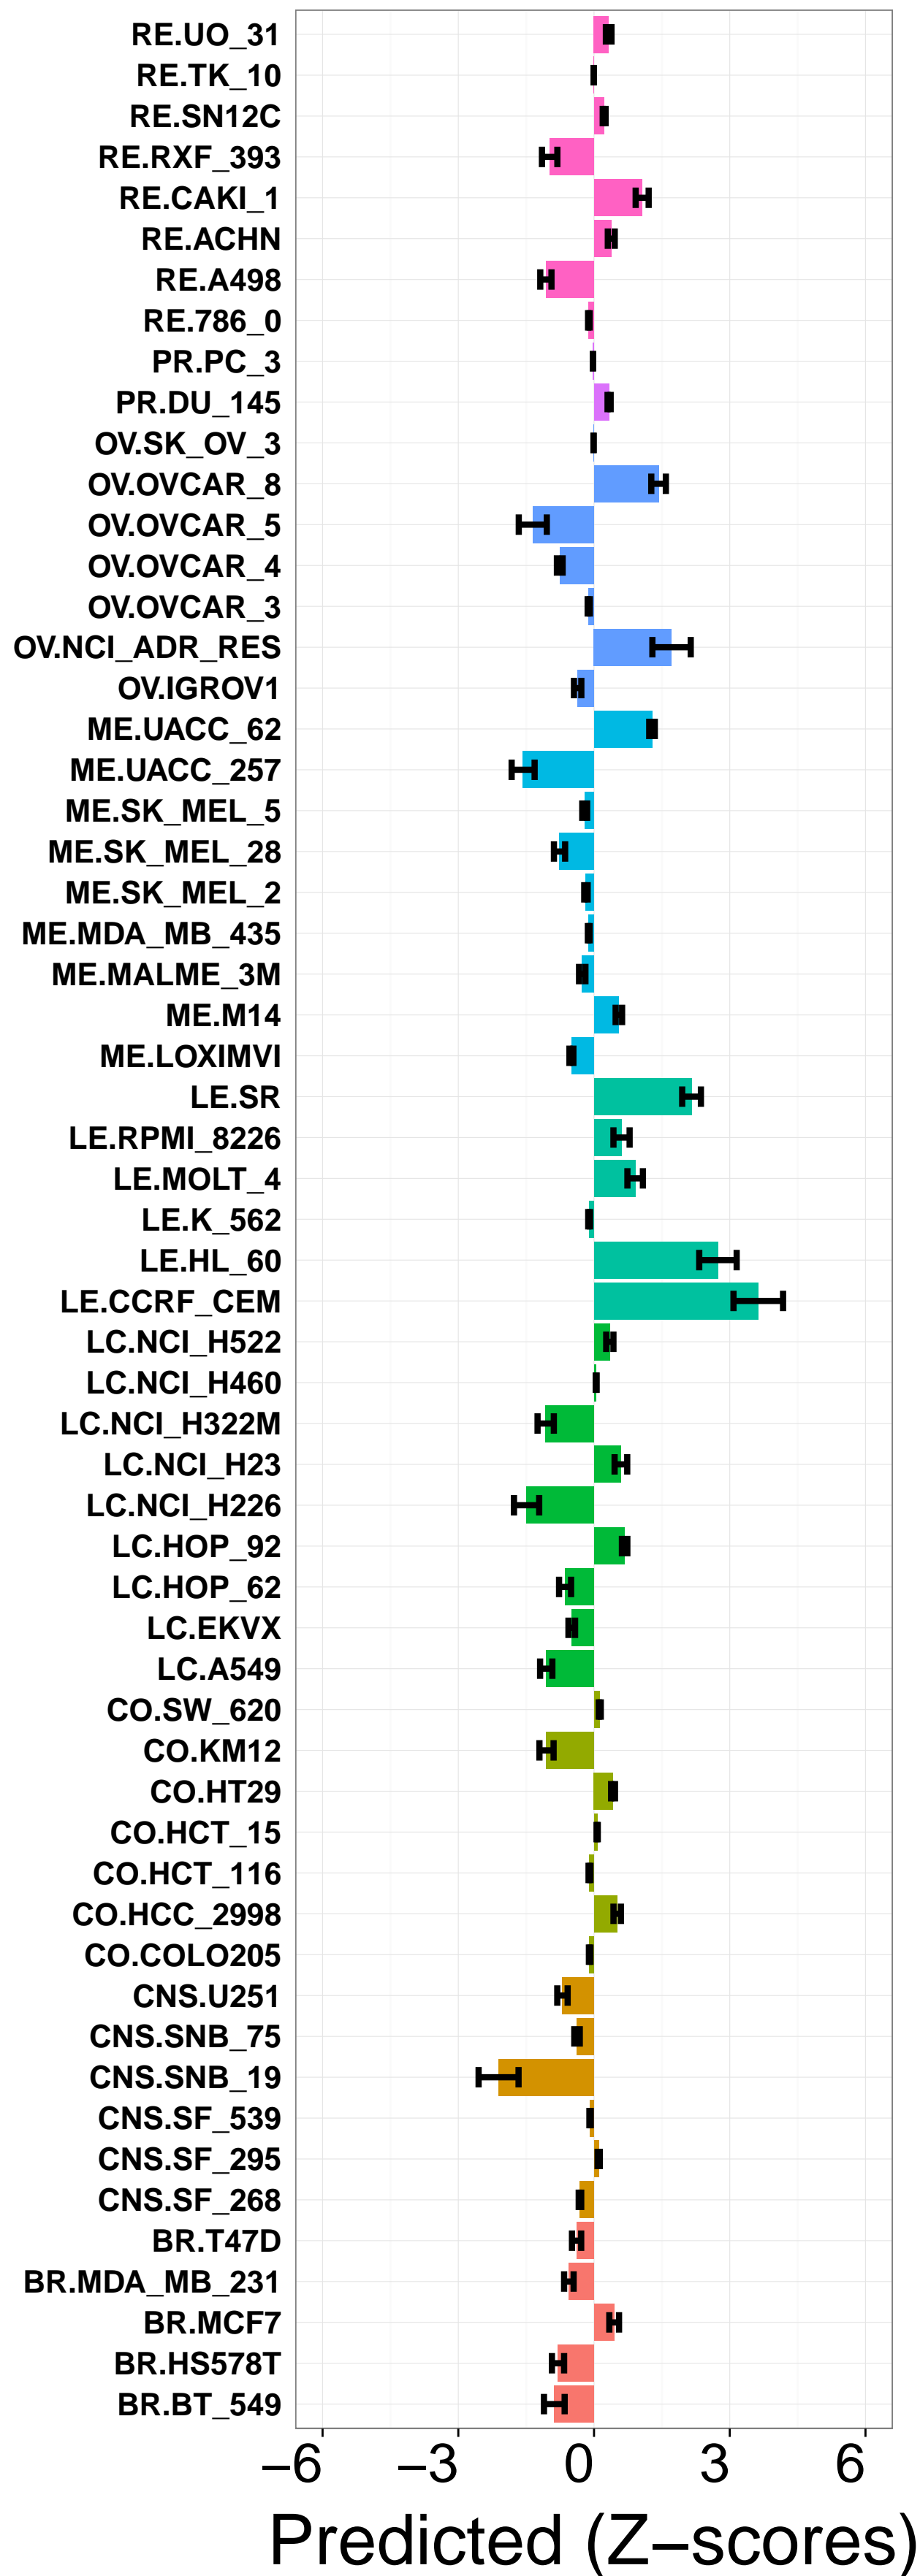

# NSC 118218, Fludarabine (Interpolation)

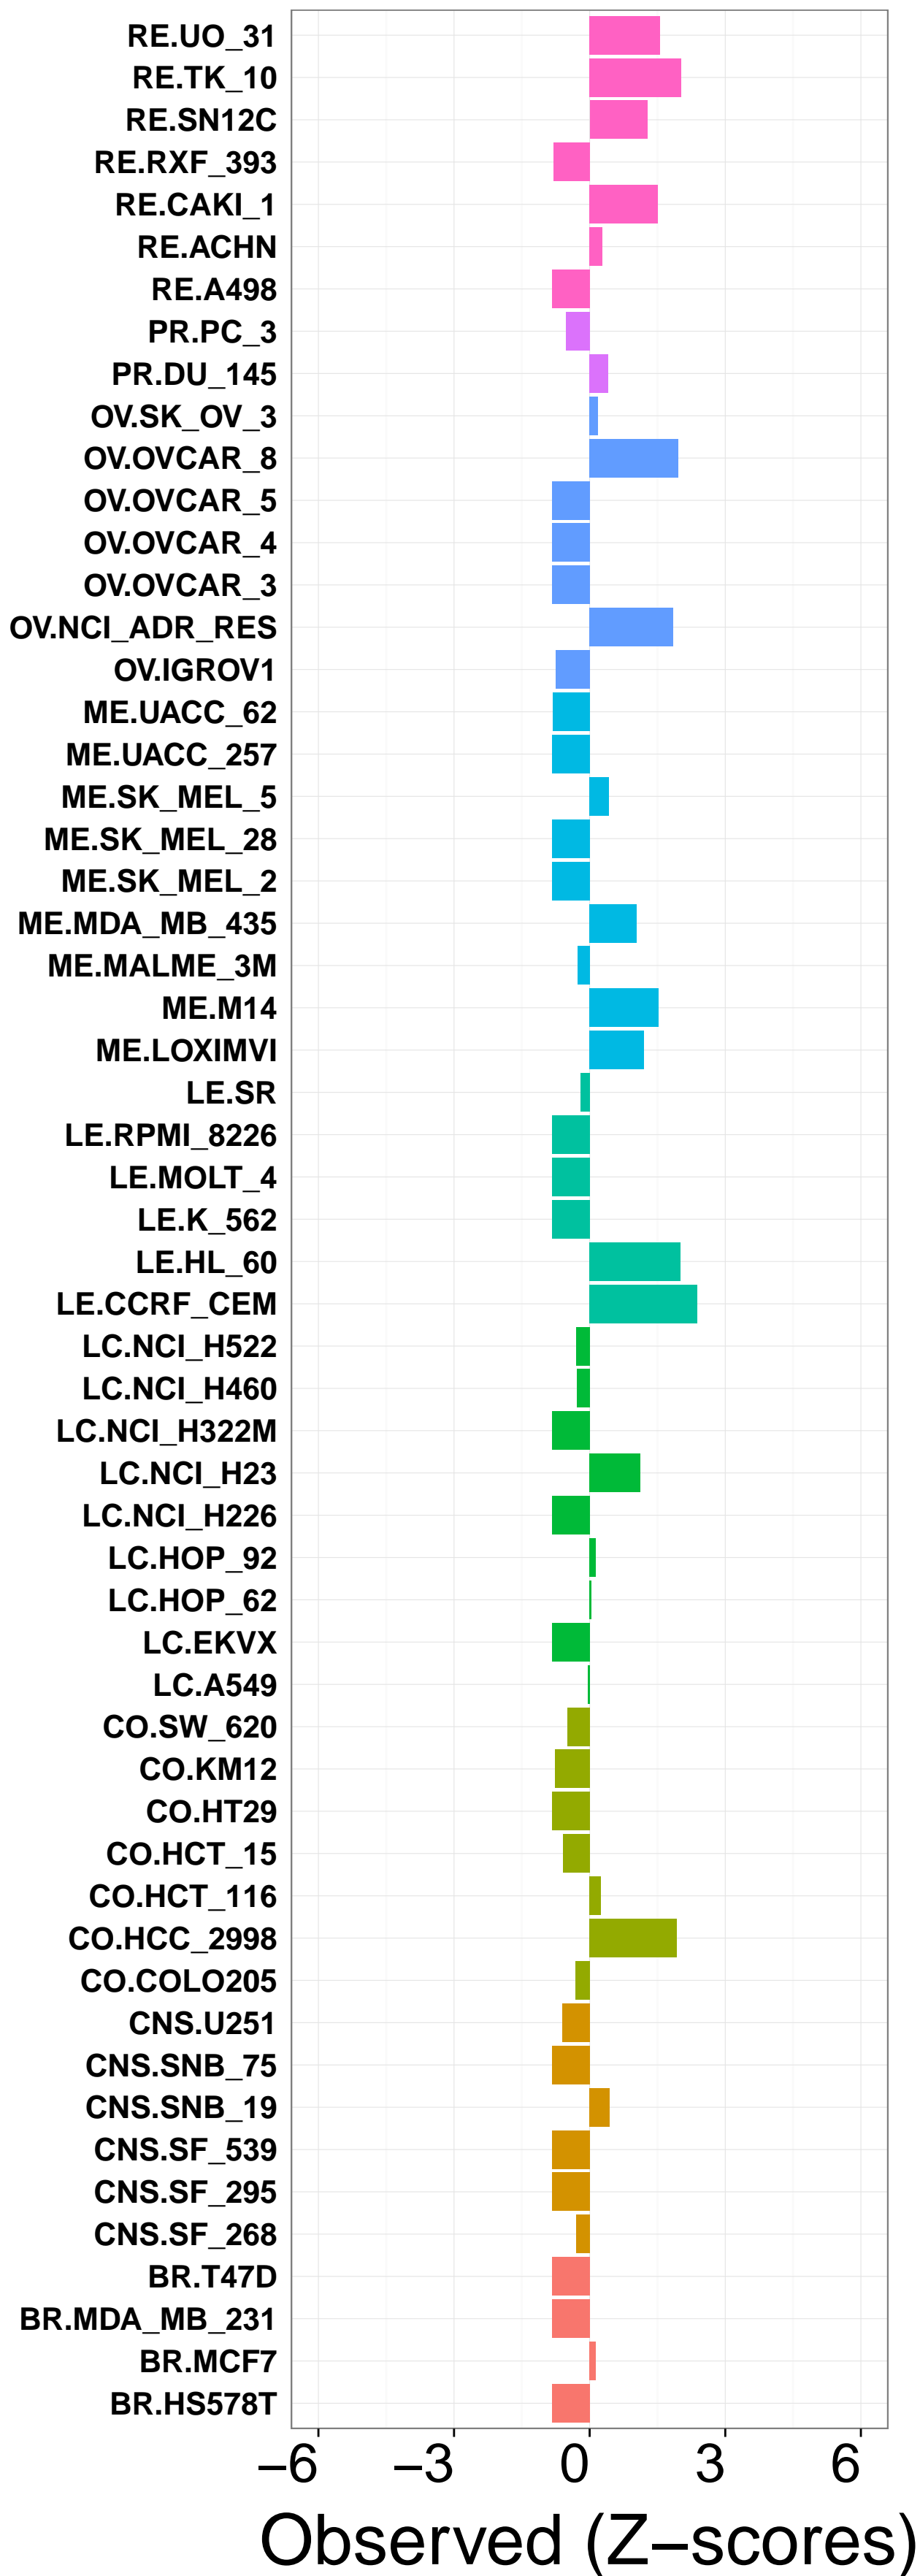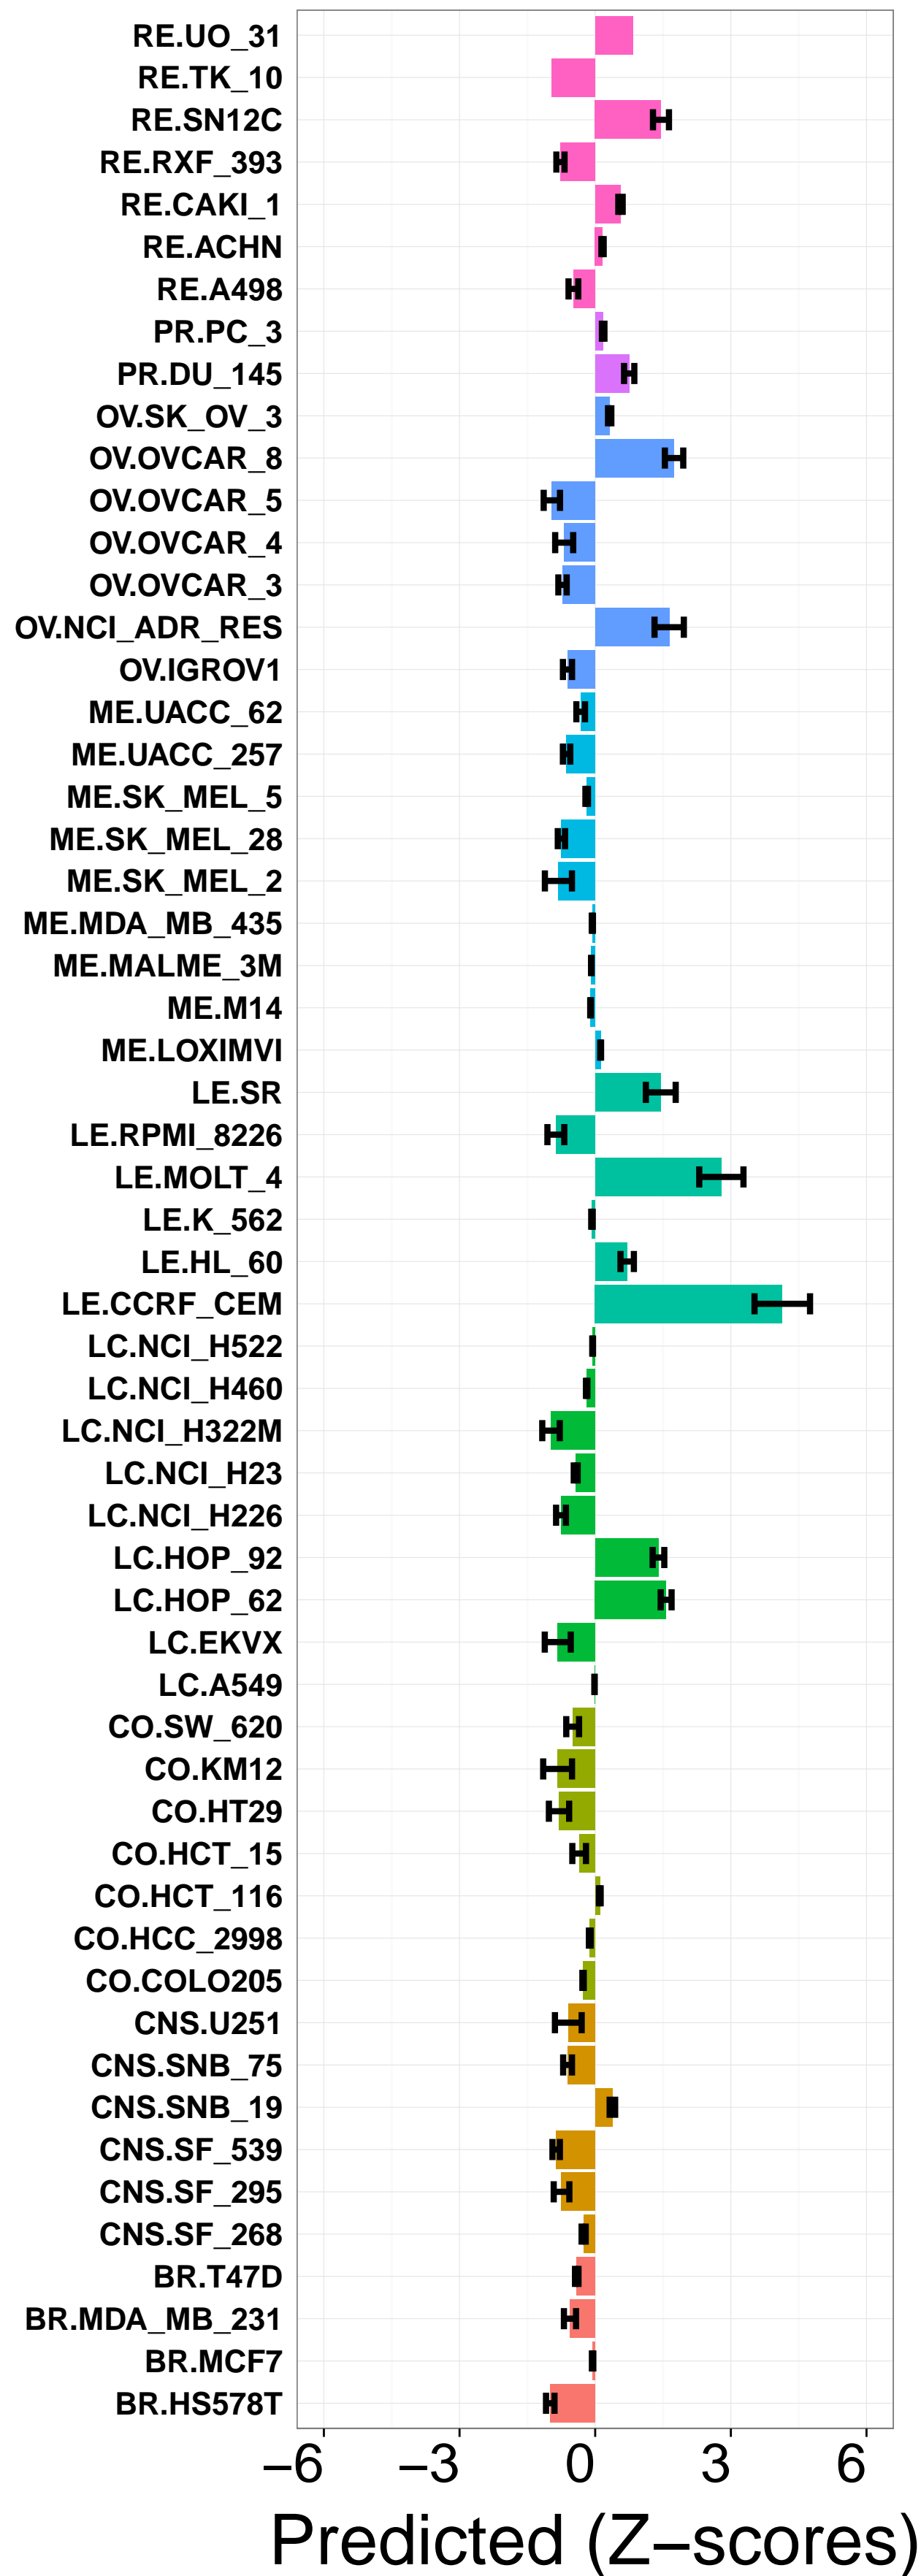

# NSC 122819, Teniposide (Interpolation)

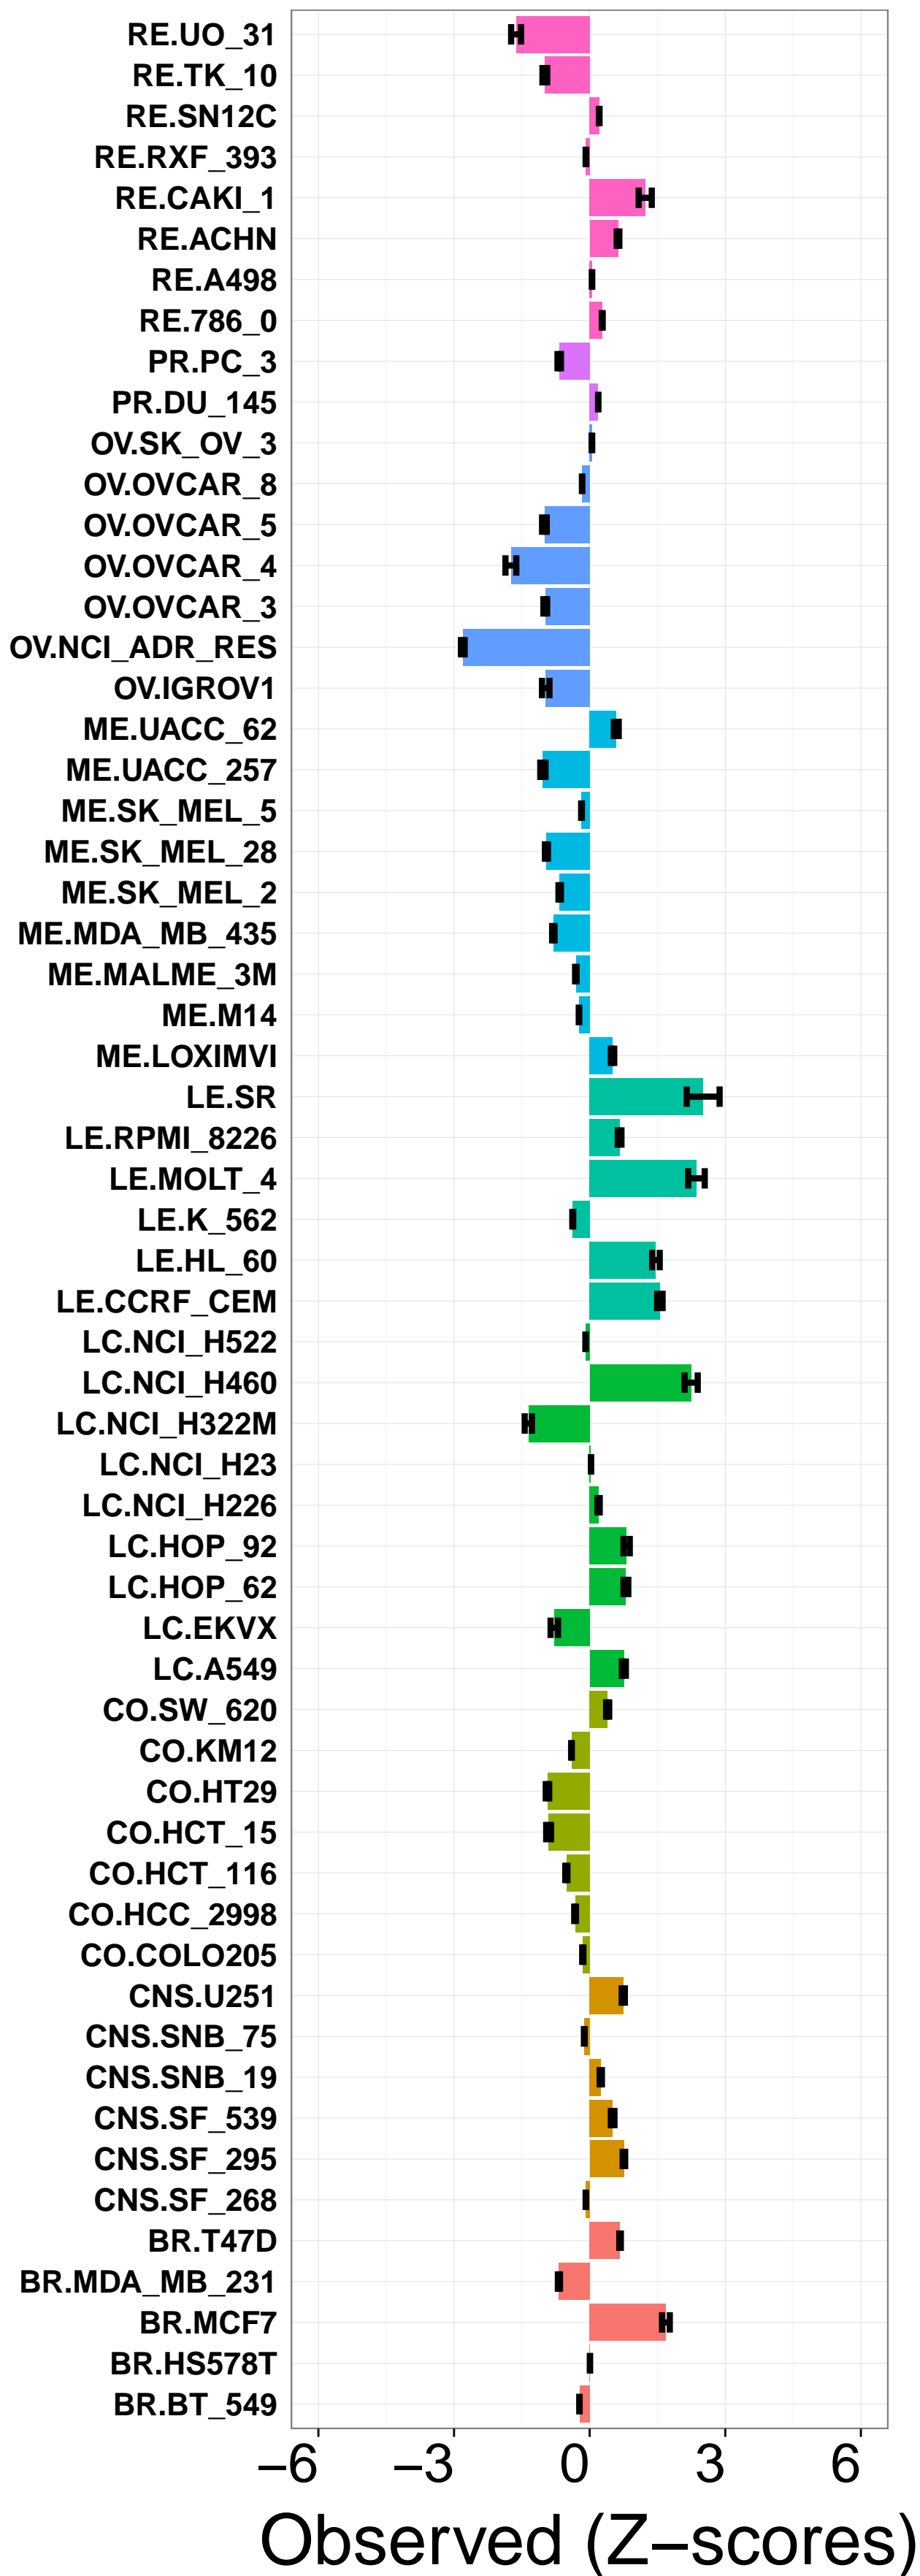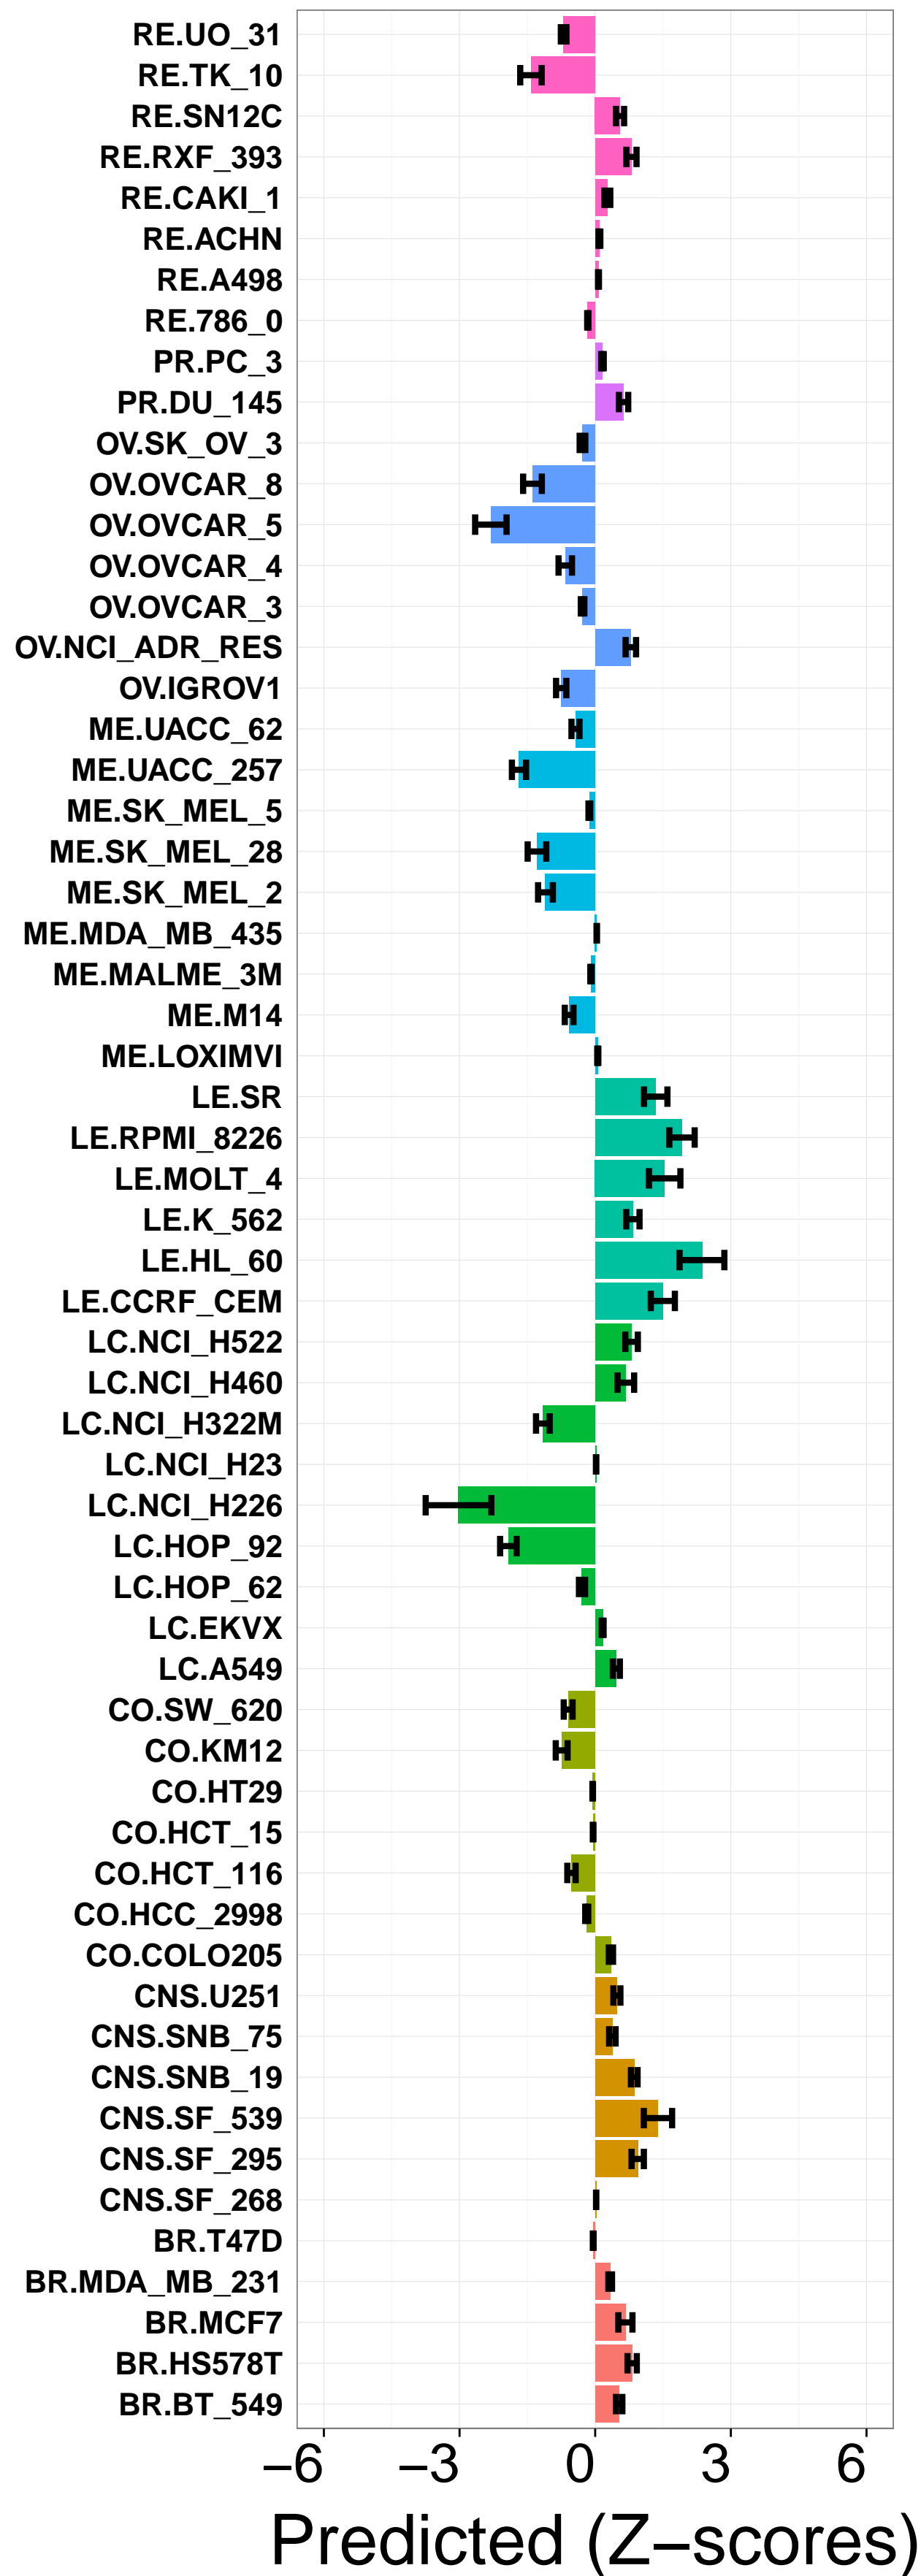

# NSC 123127, Doxorubicin\_Hydrochloride (Interpolation)

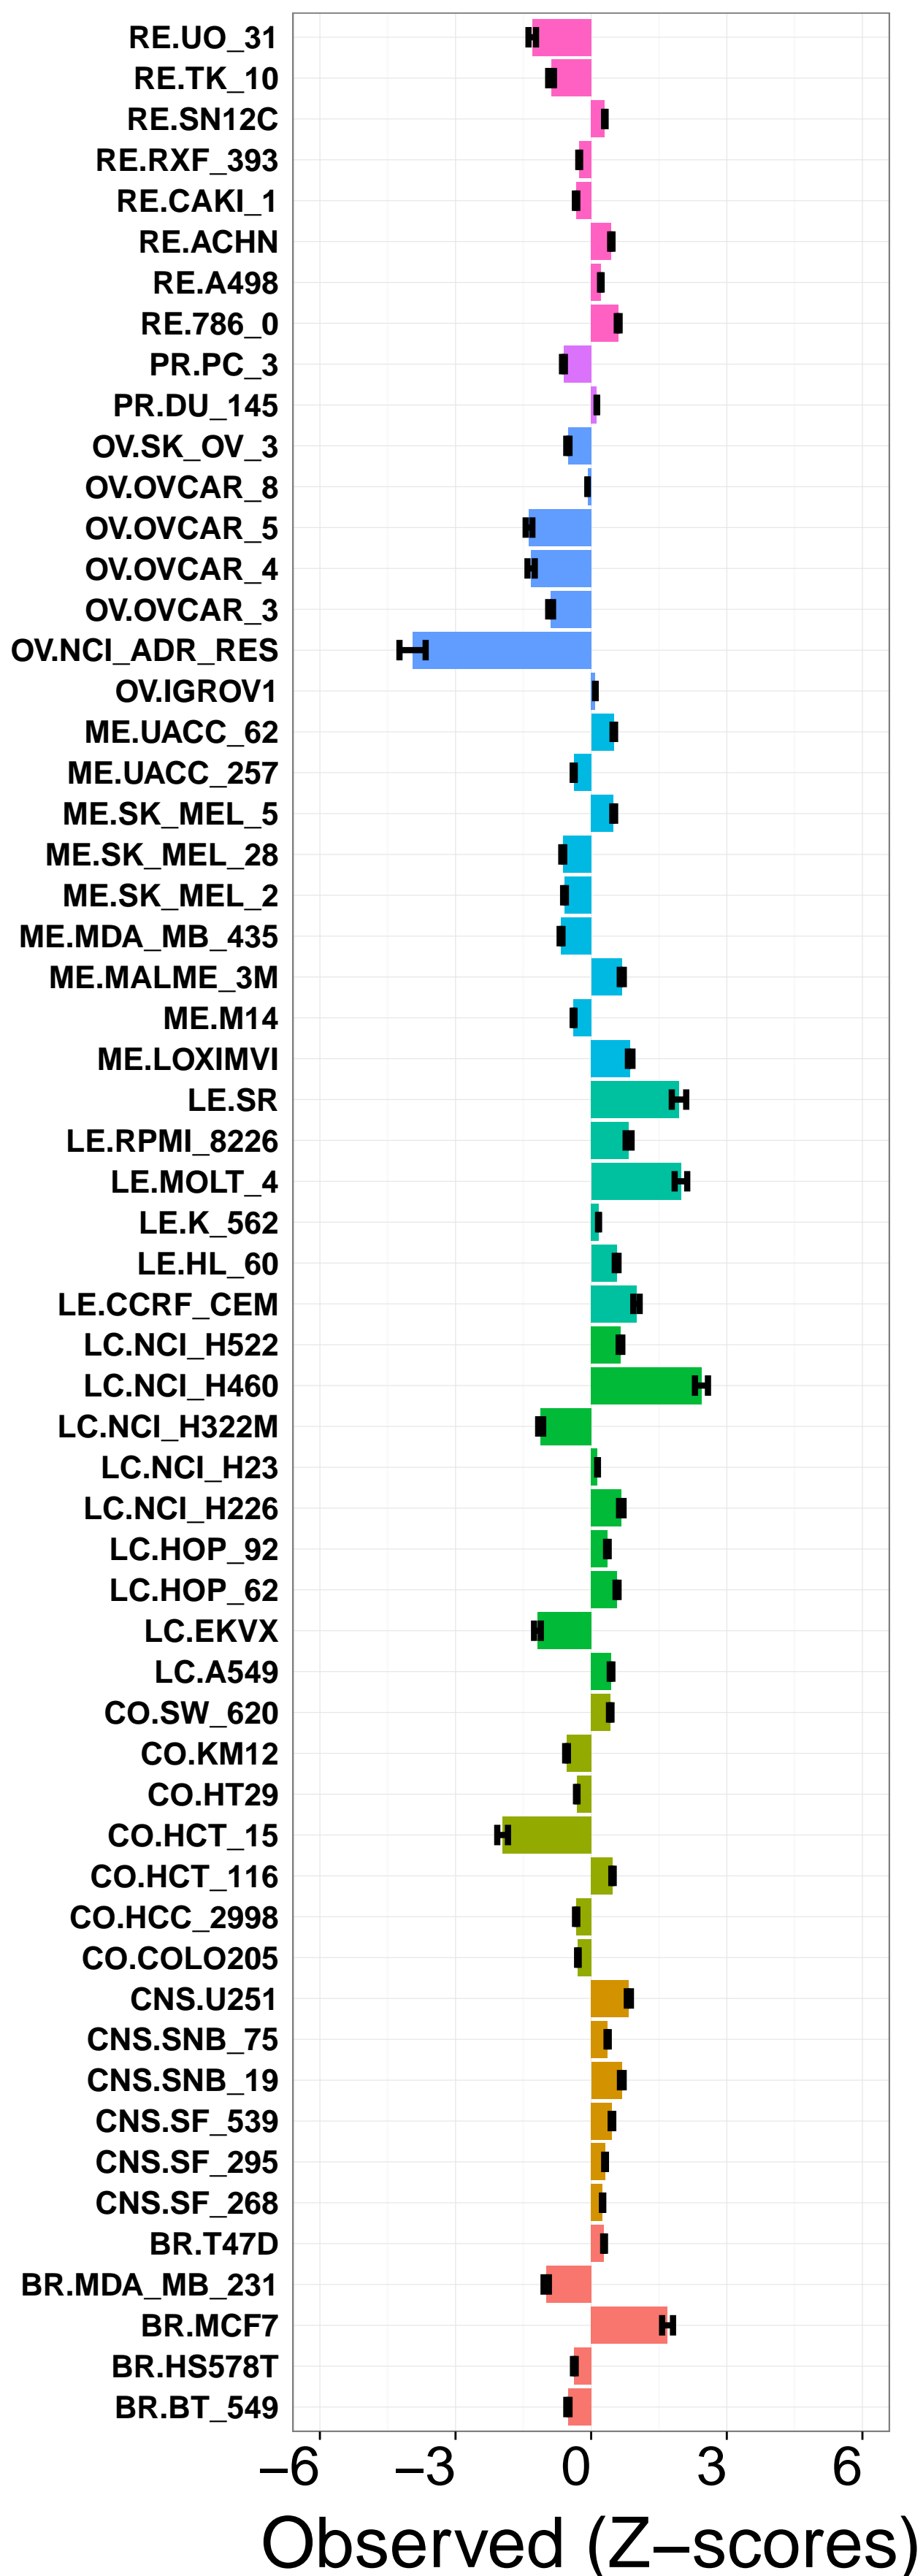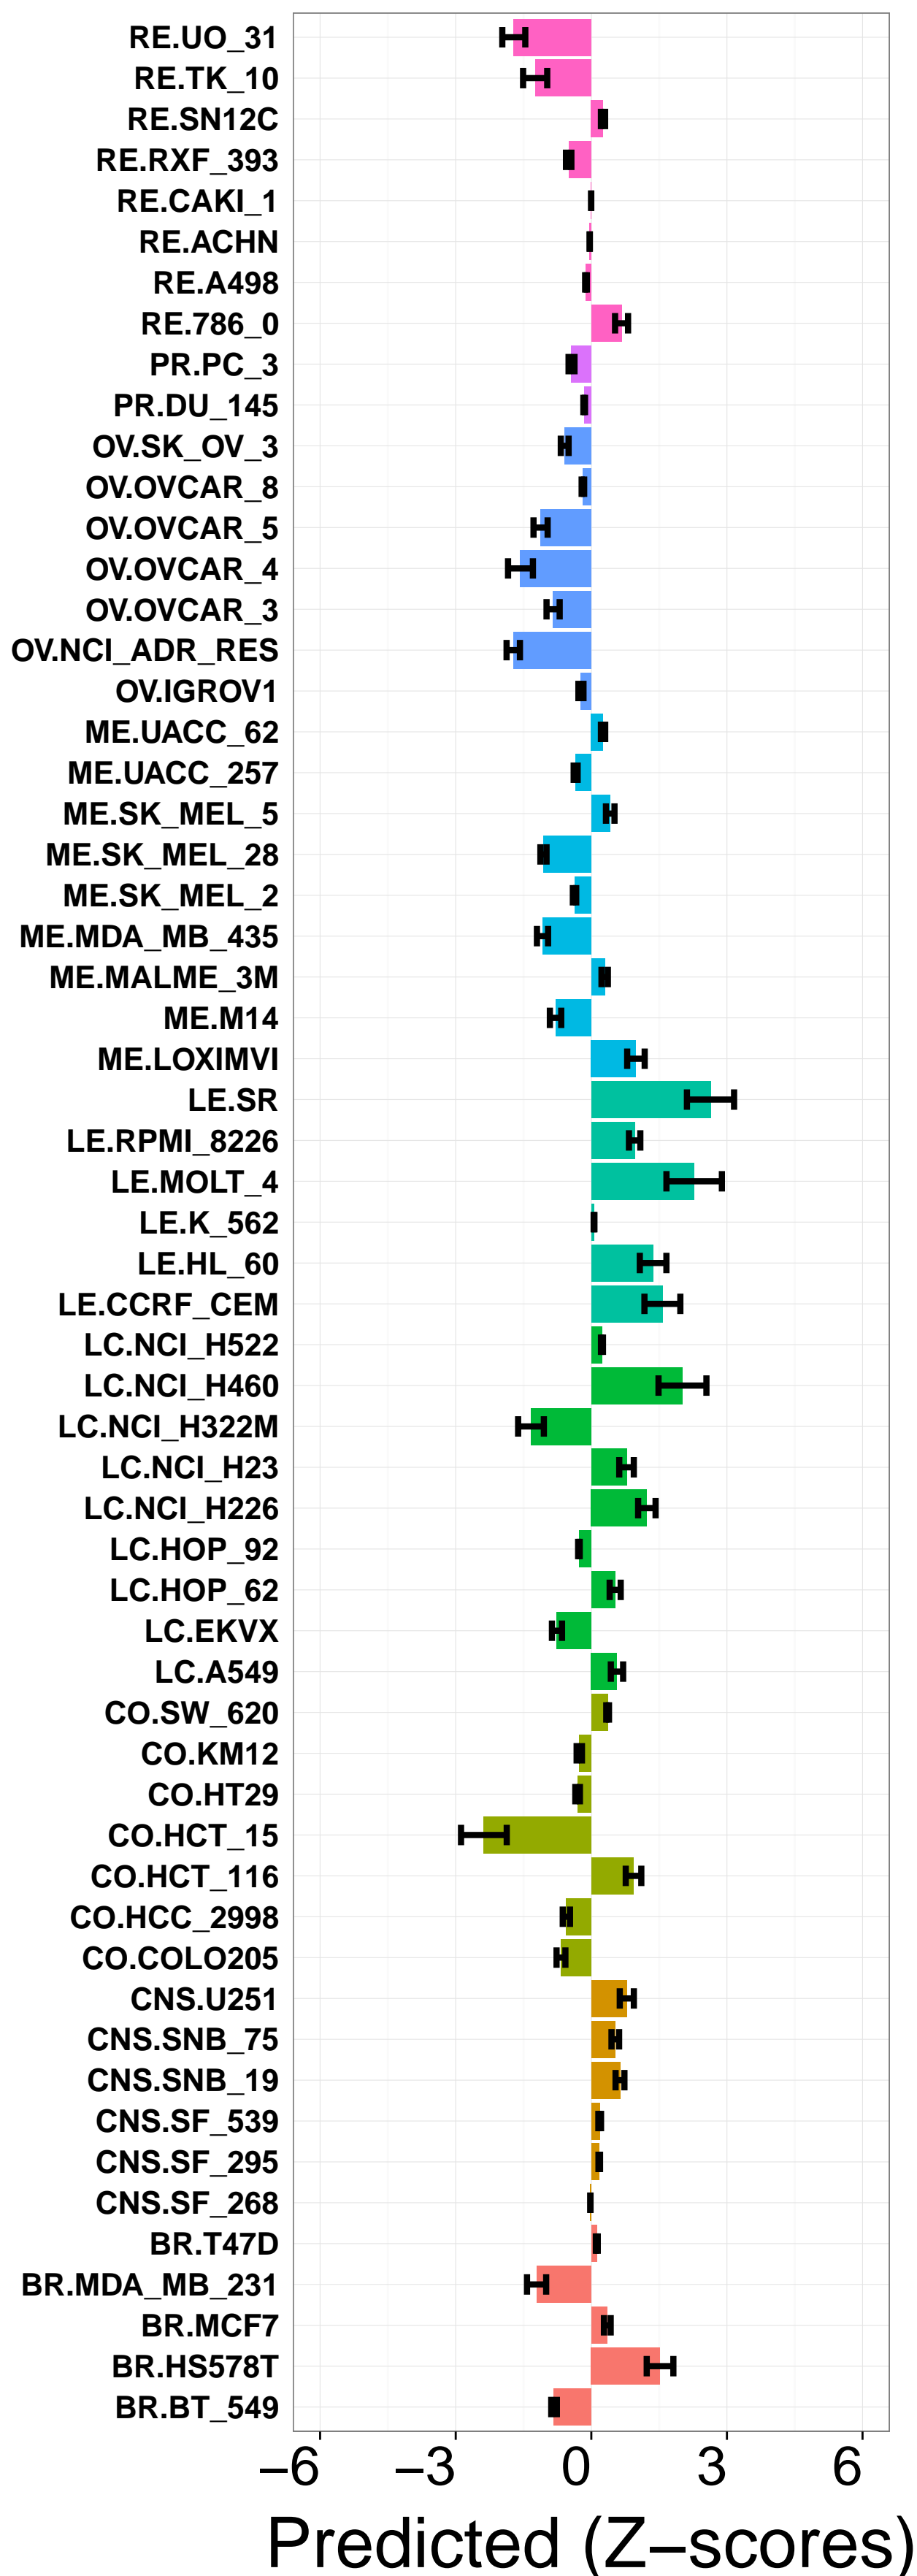

# NSC 125973, (Interpolation)

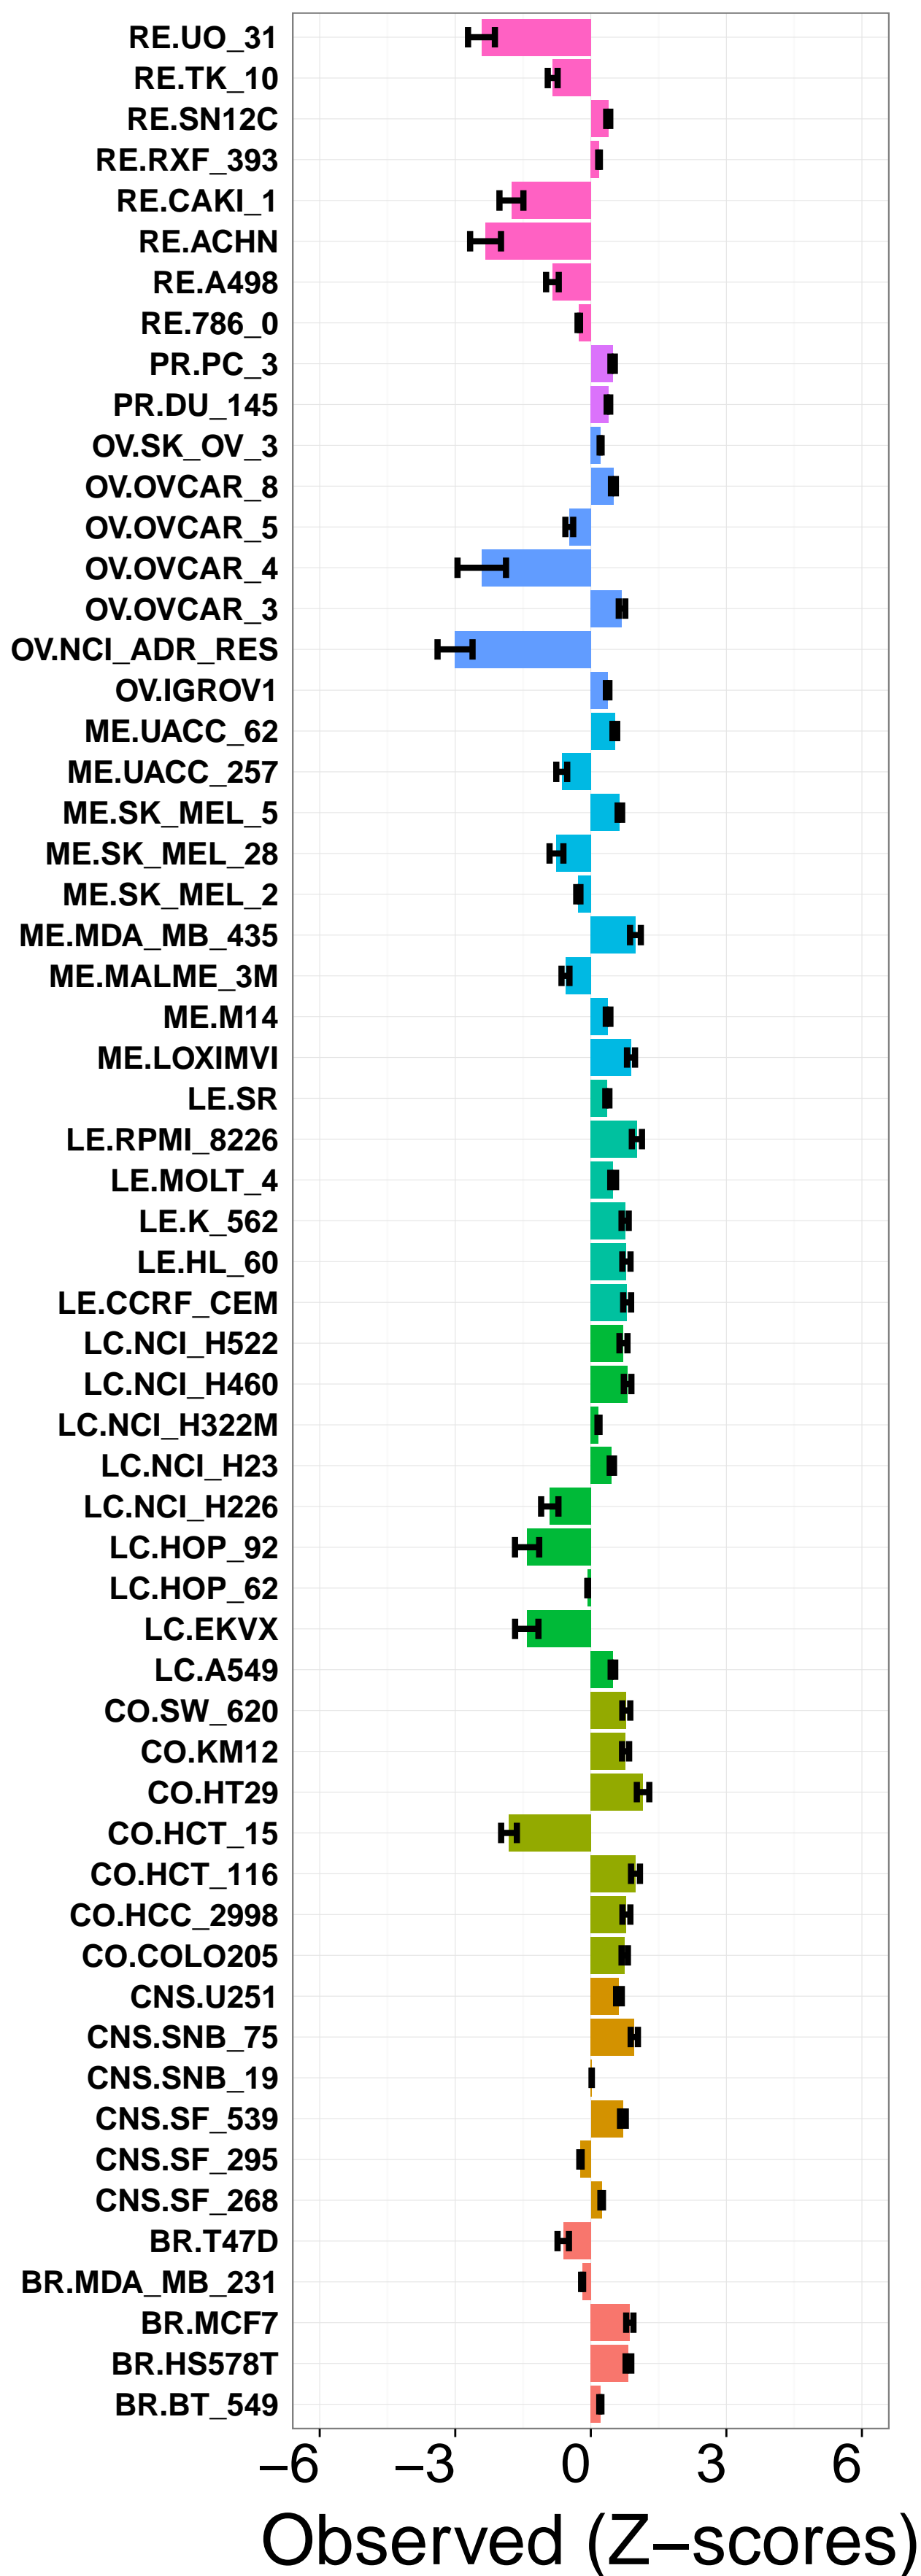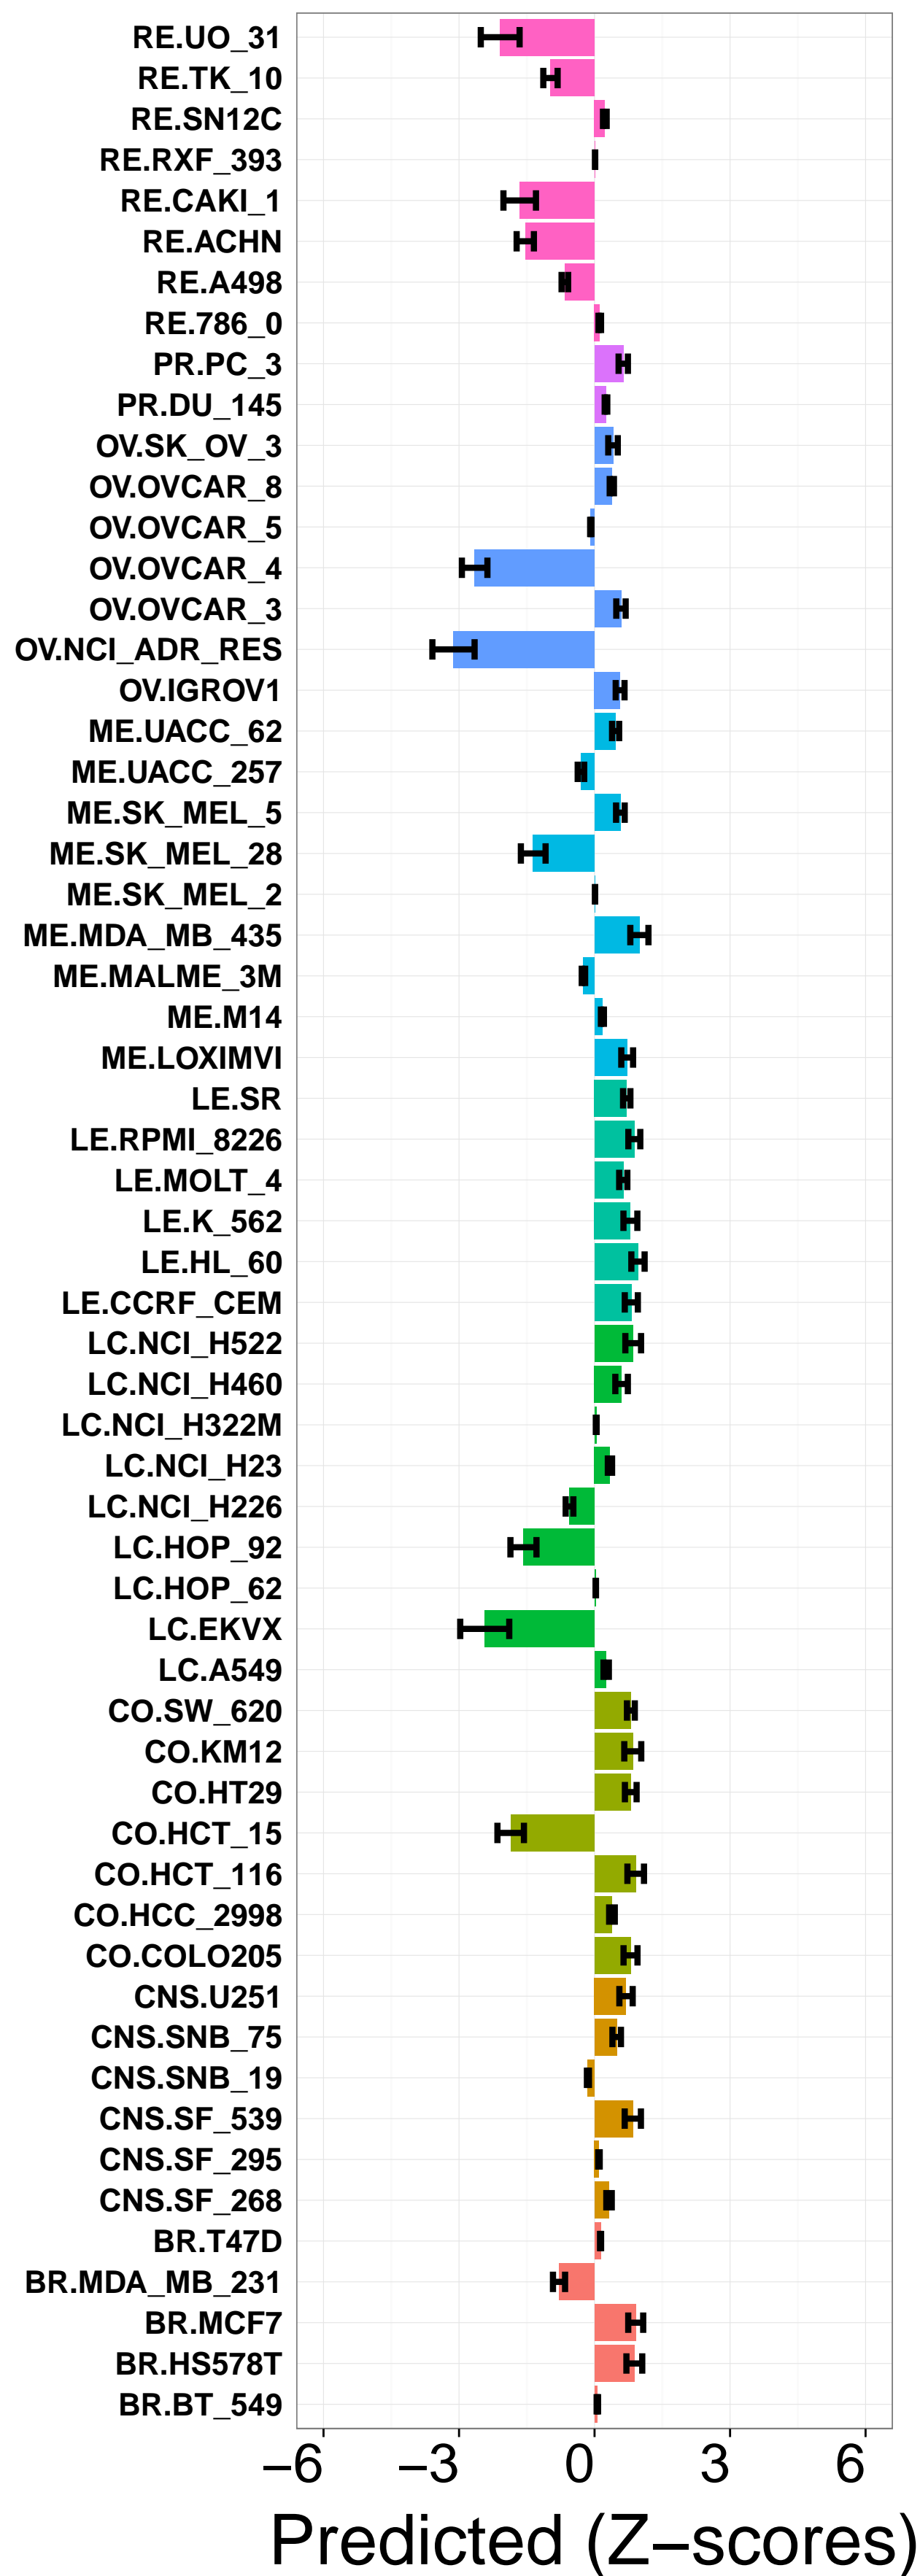



# NSC 127716, Decitabine (Interpolation)

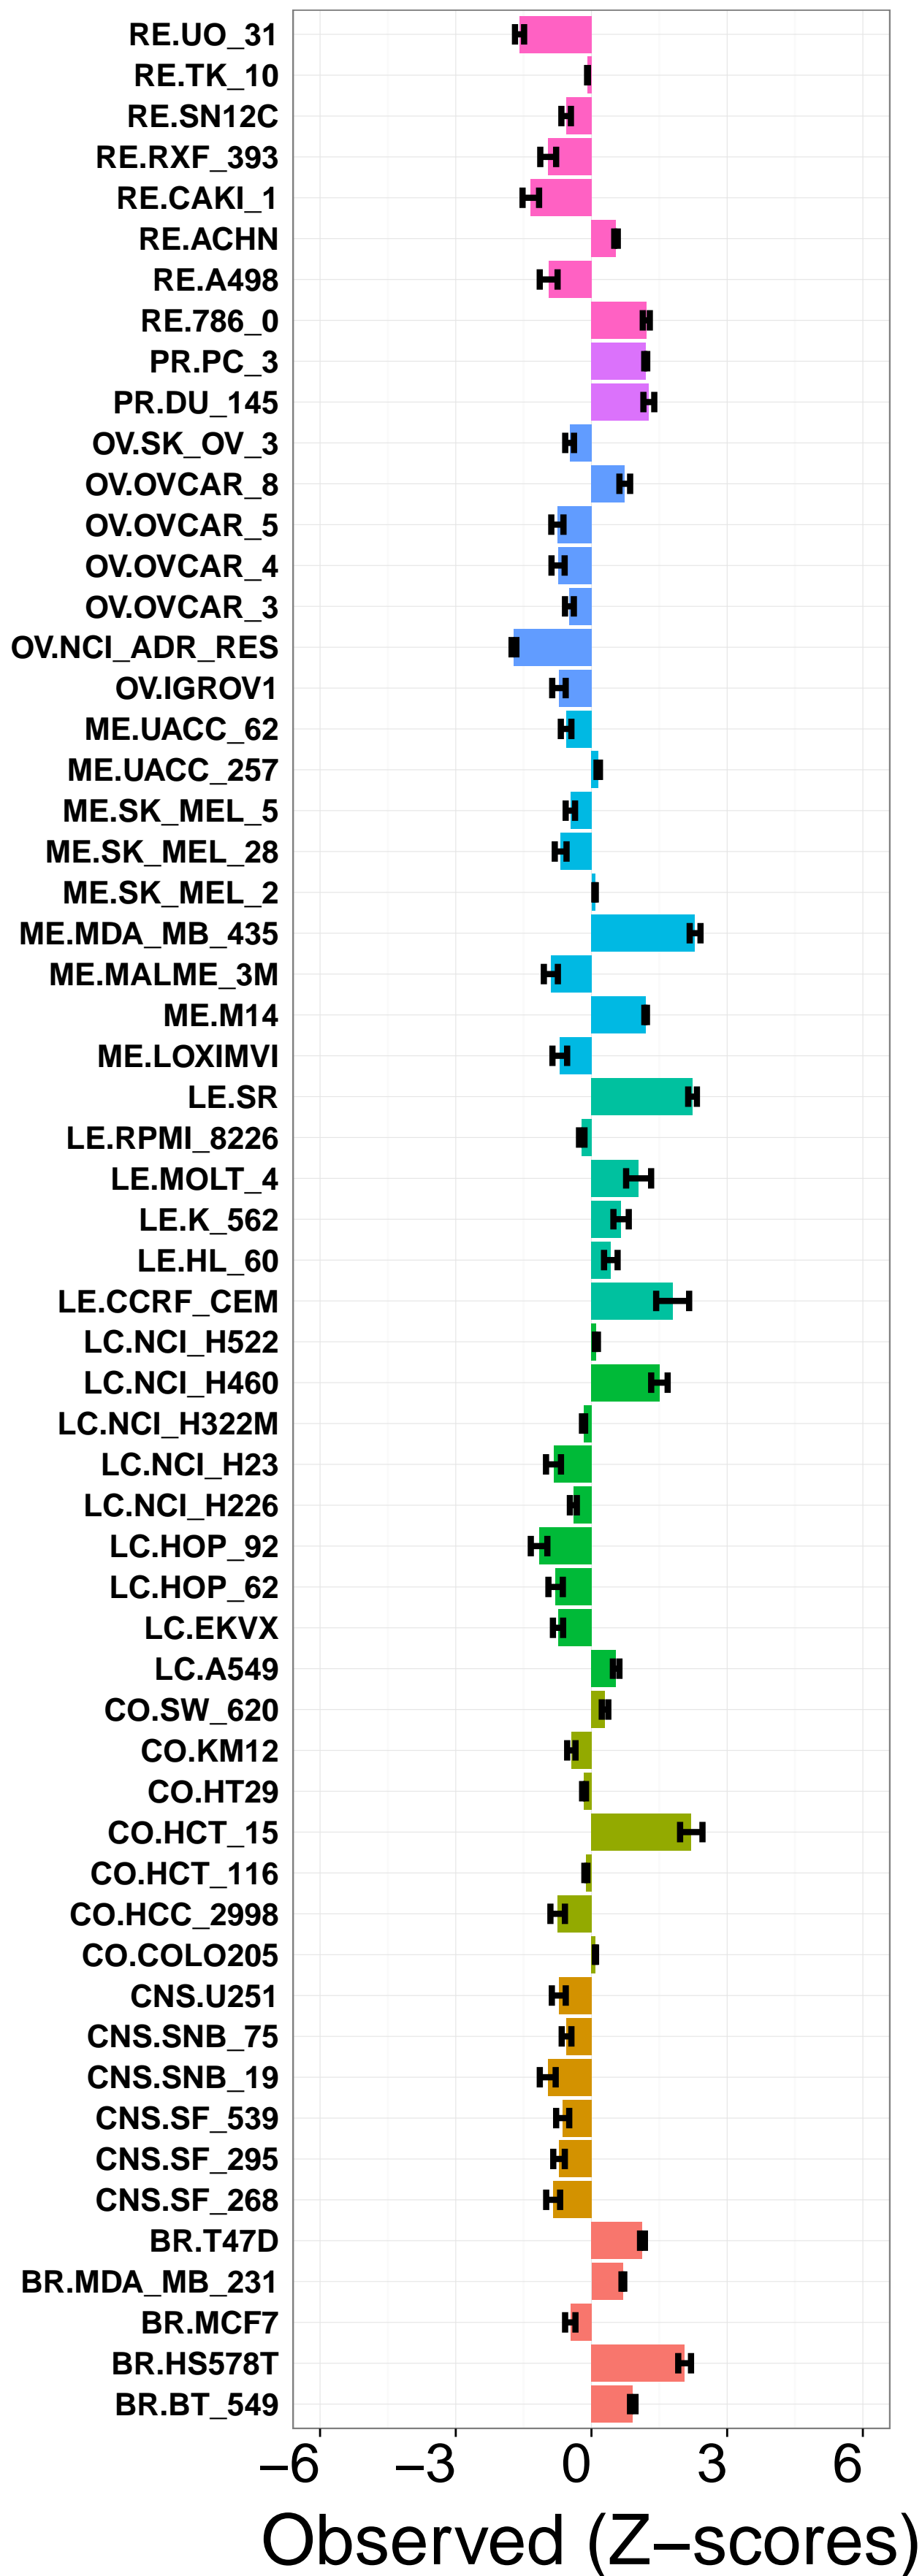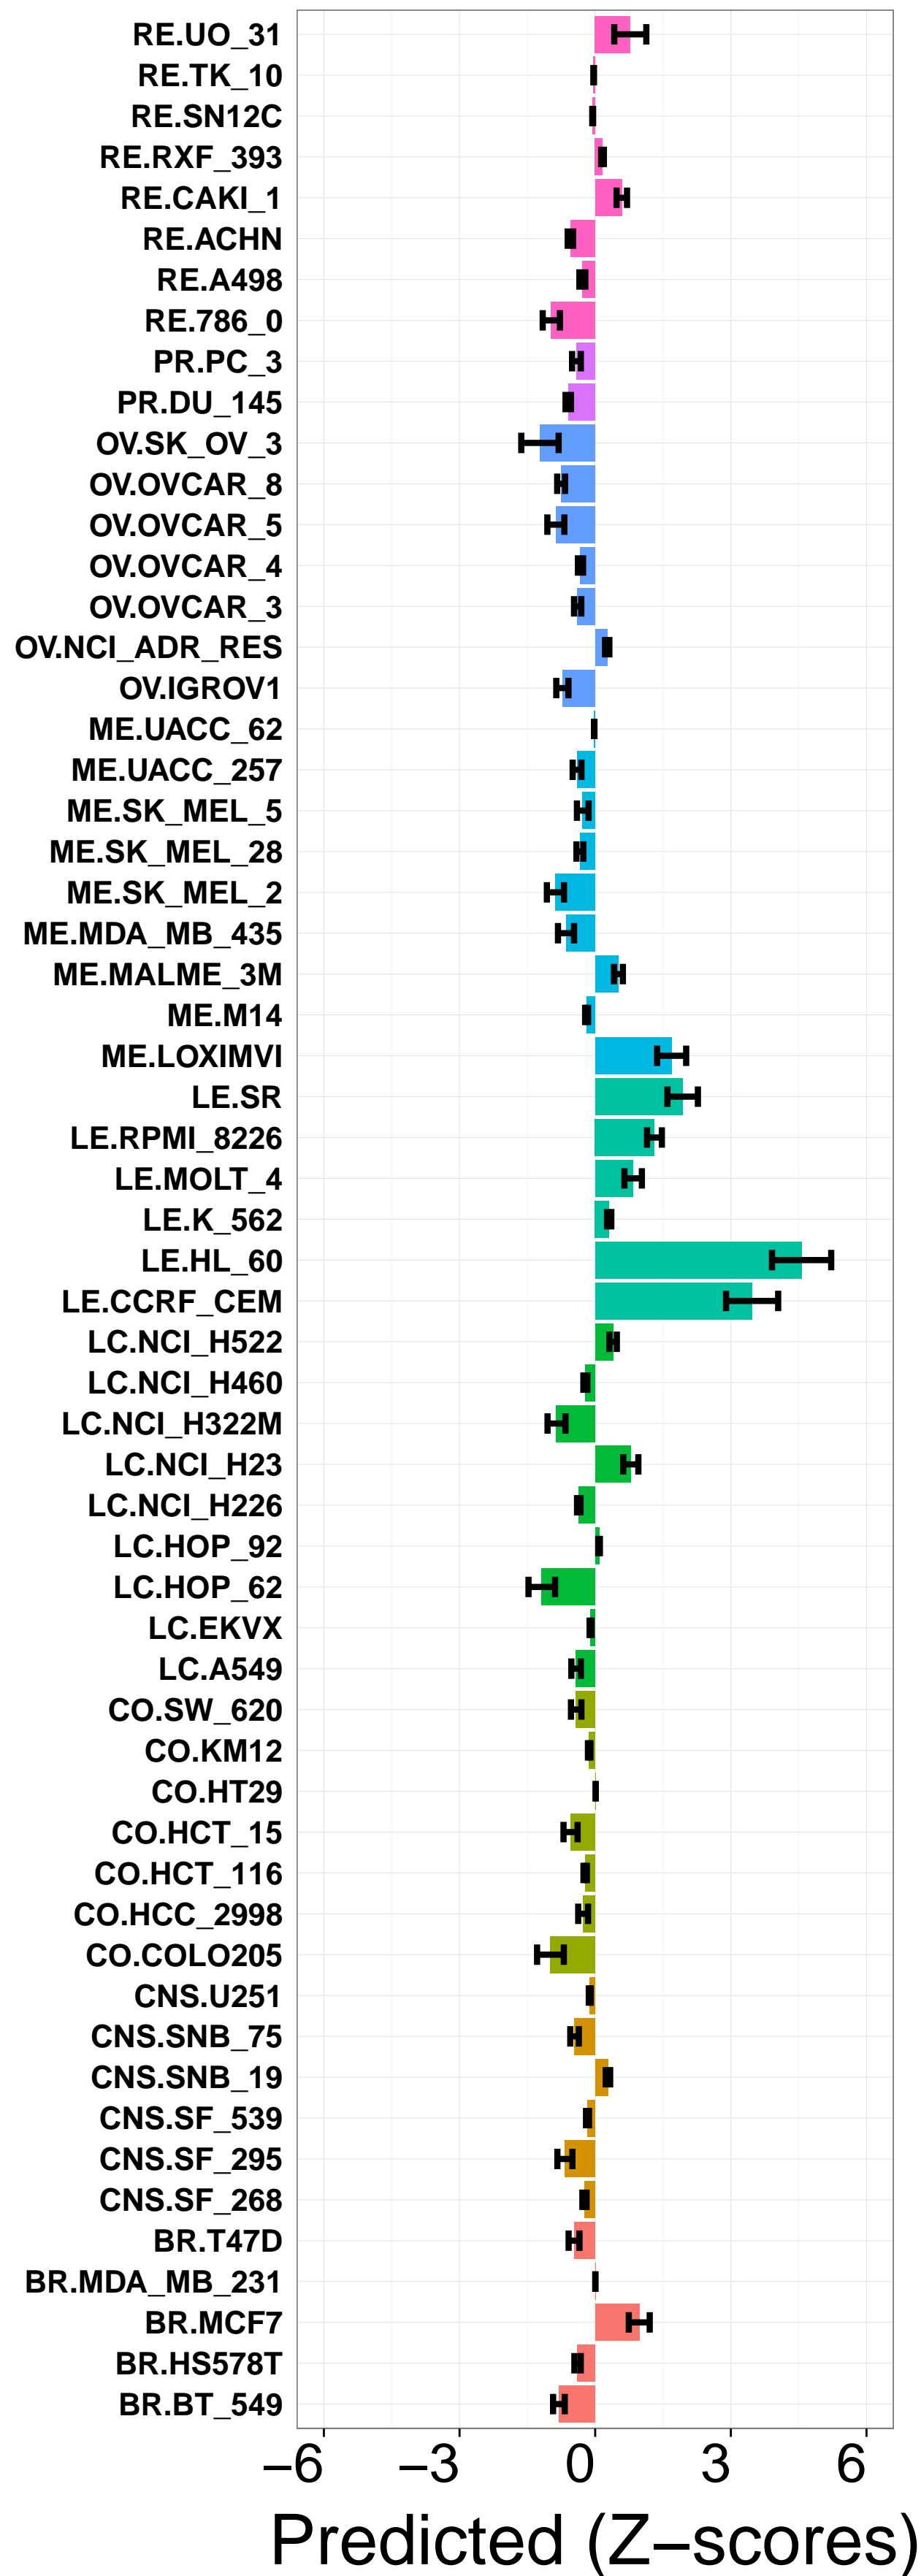

# NSC 141540, (Interpolation)

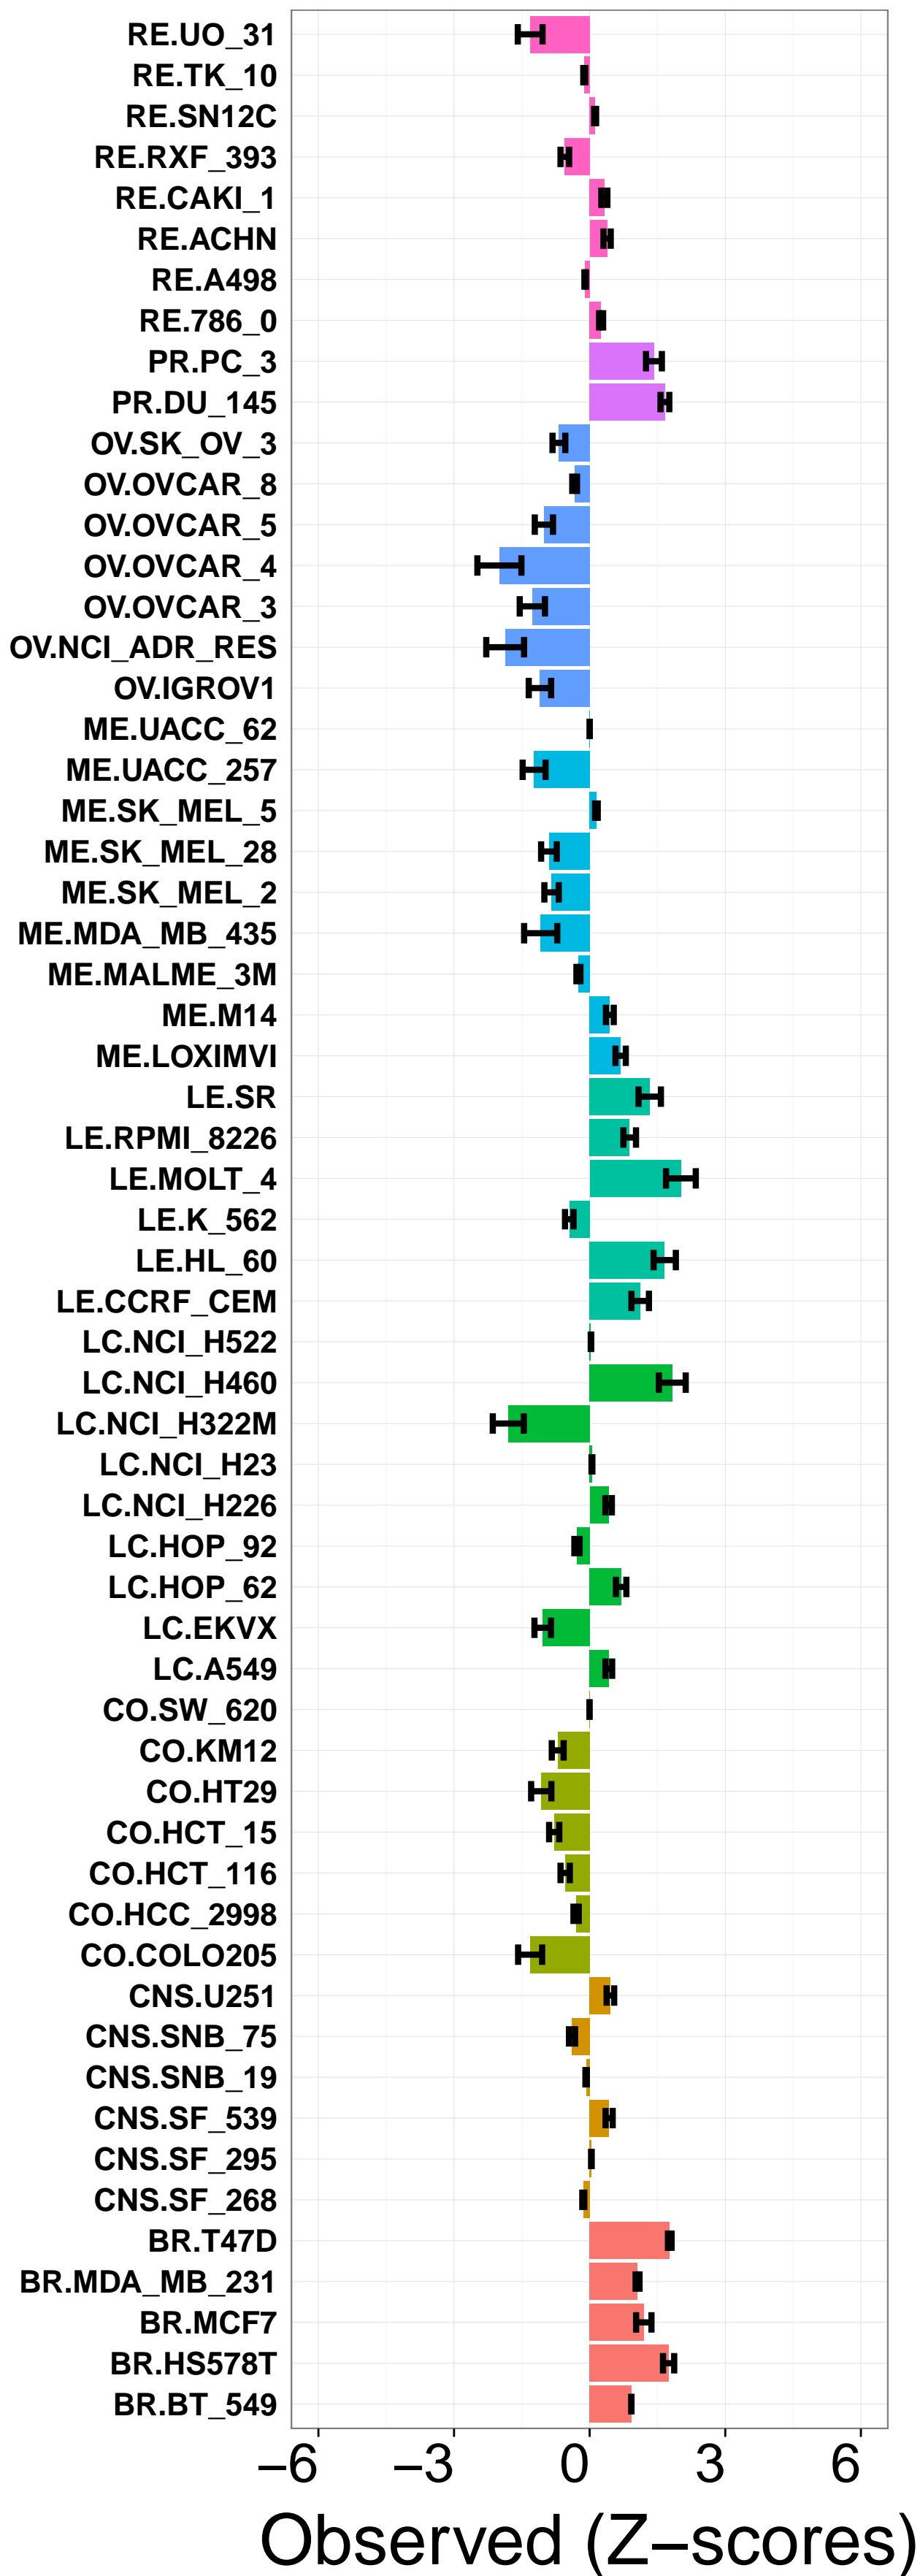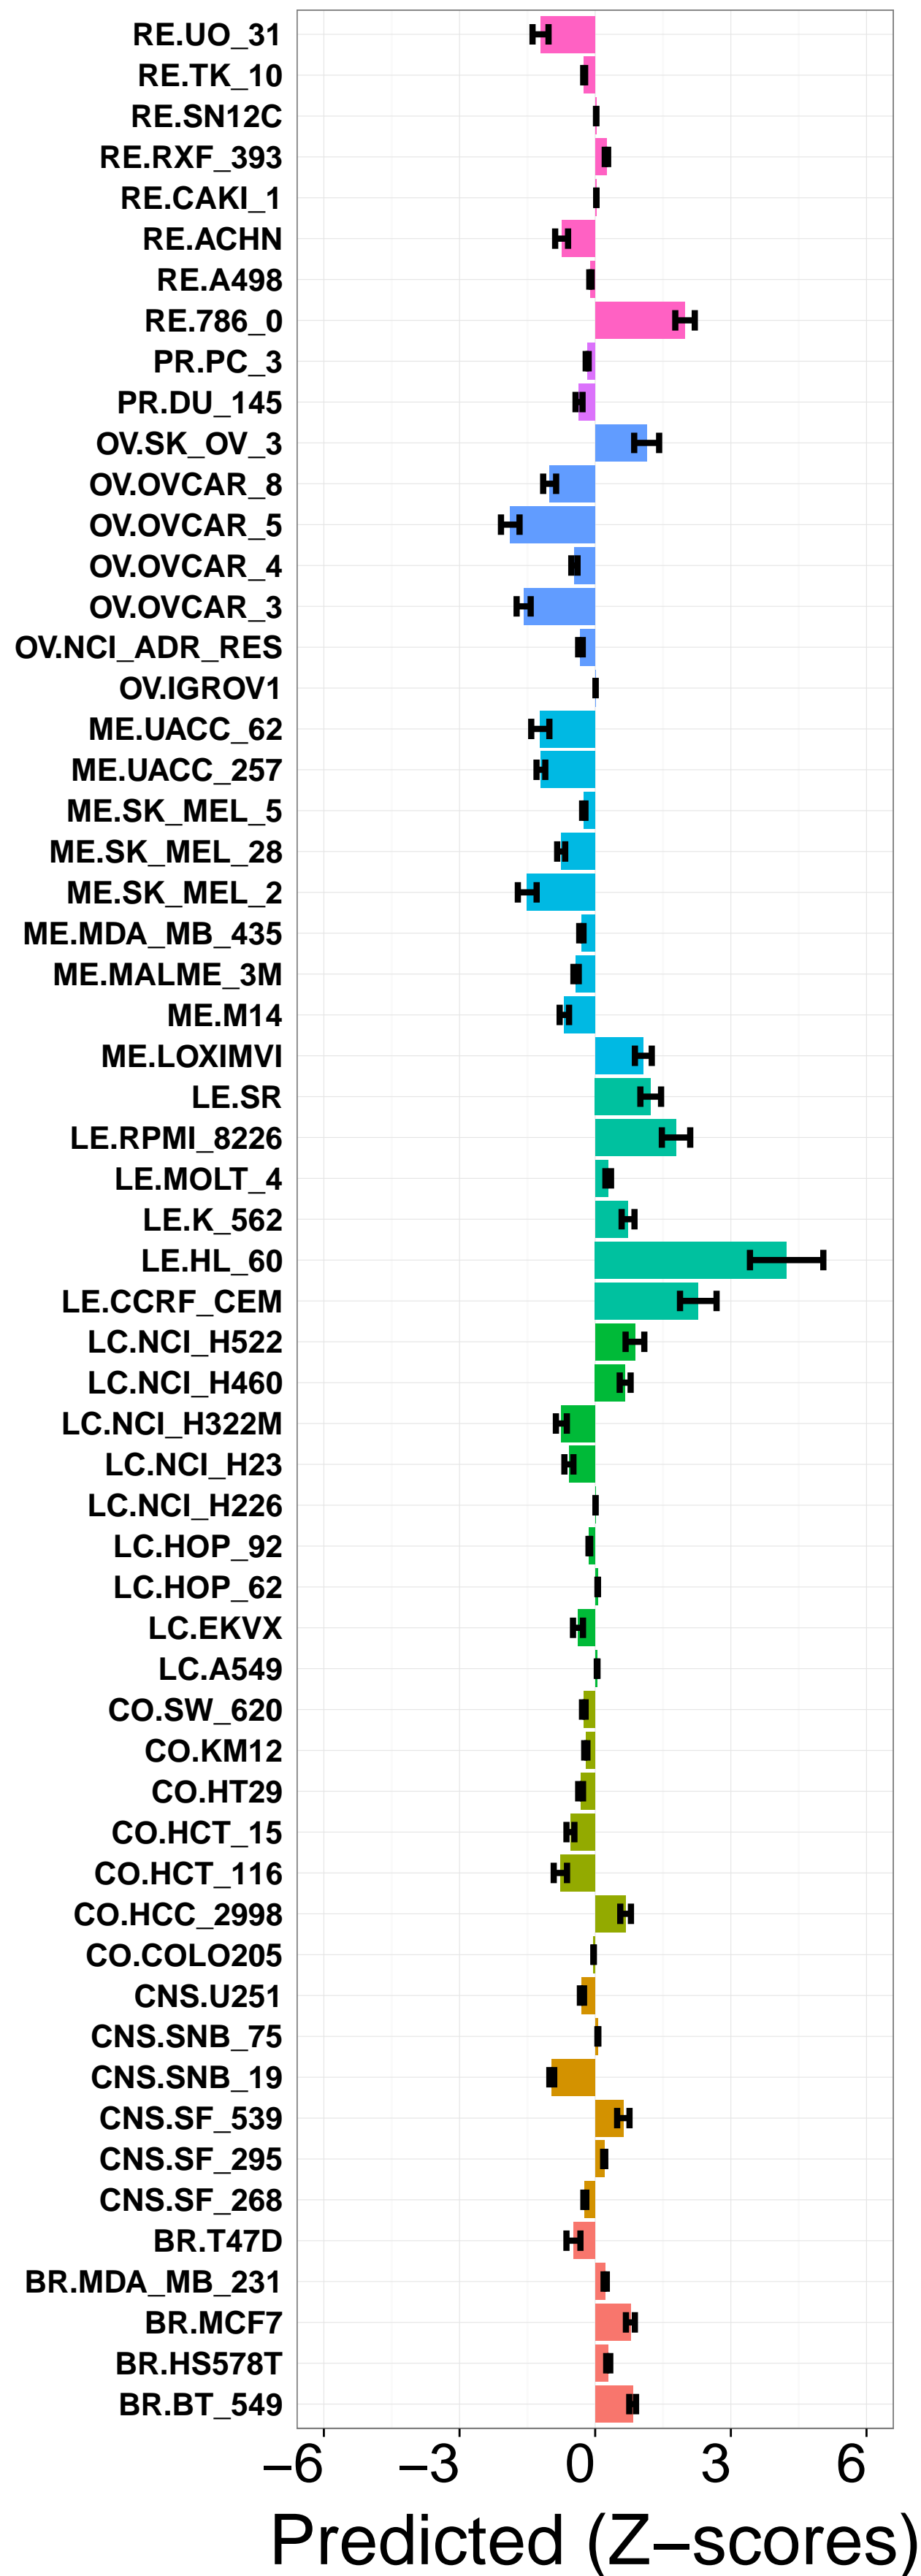

# NSC 141633, (Interpolation)

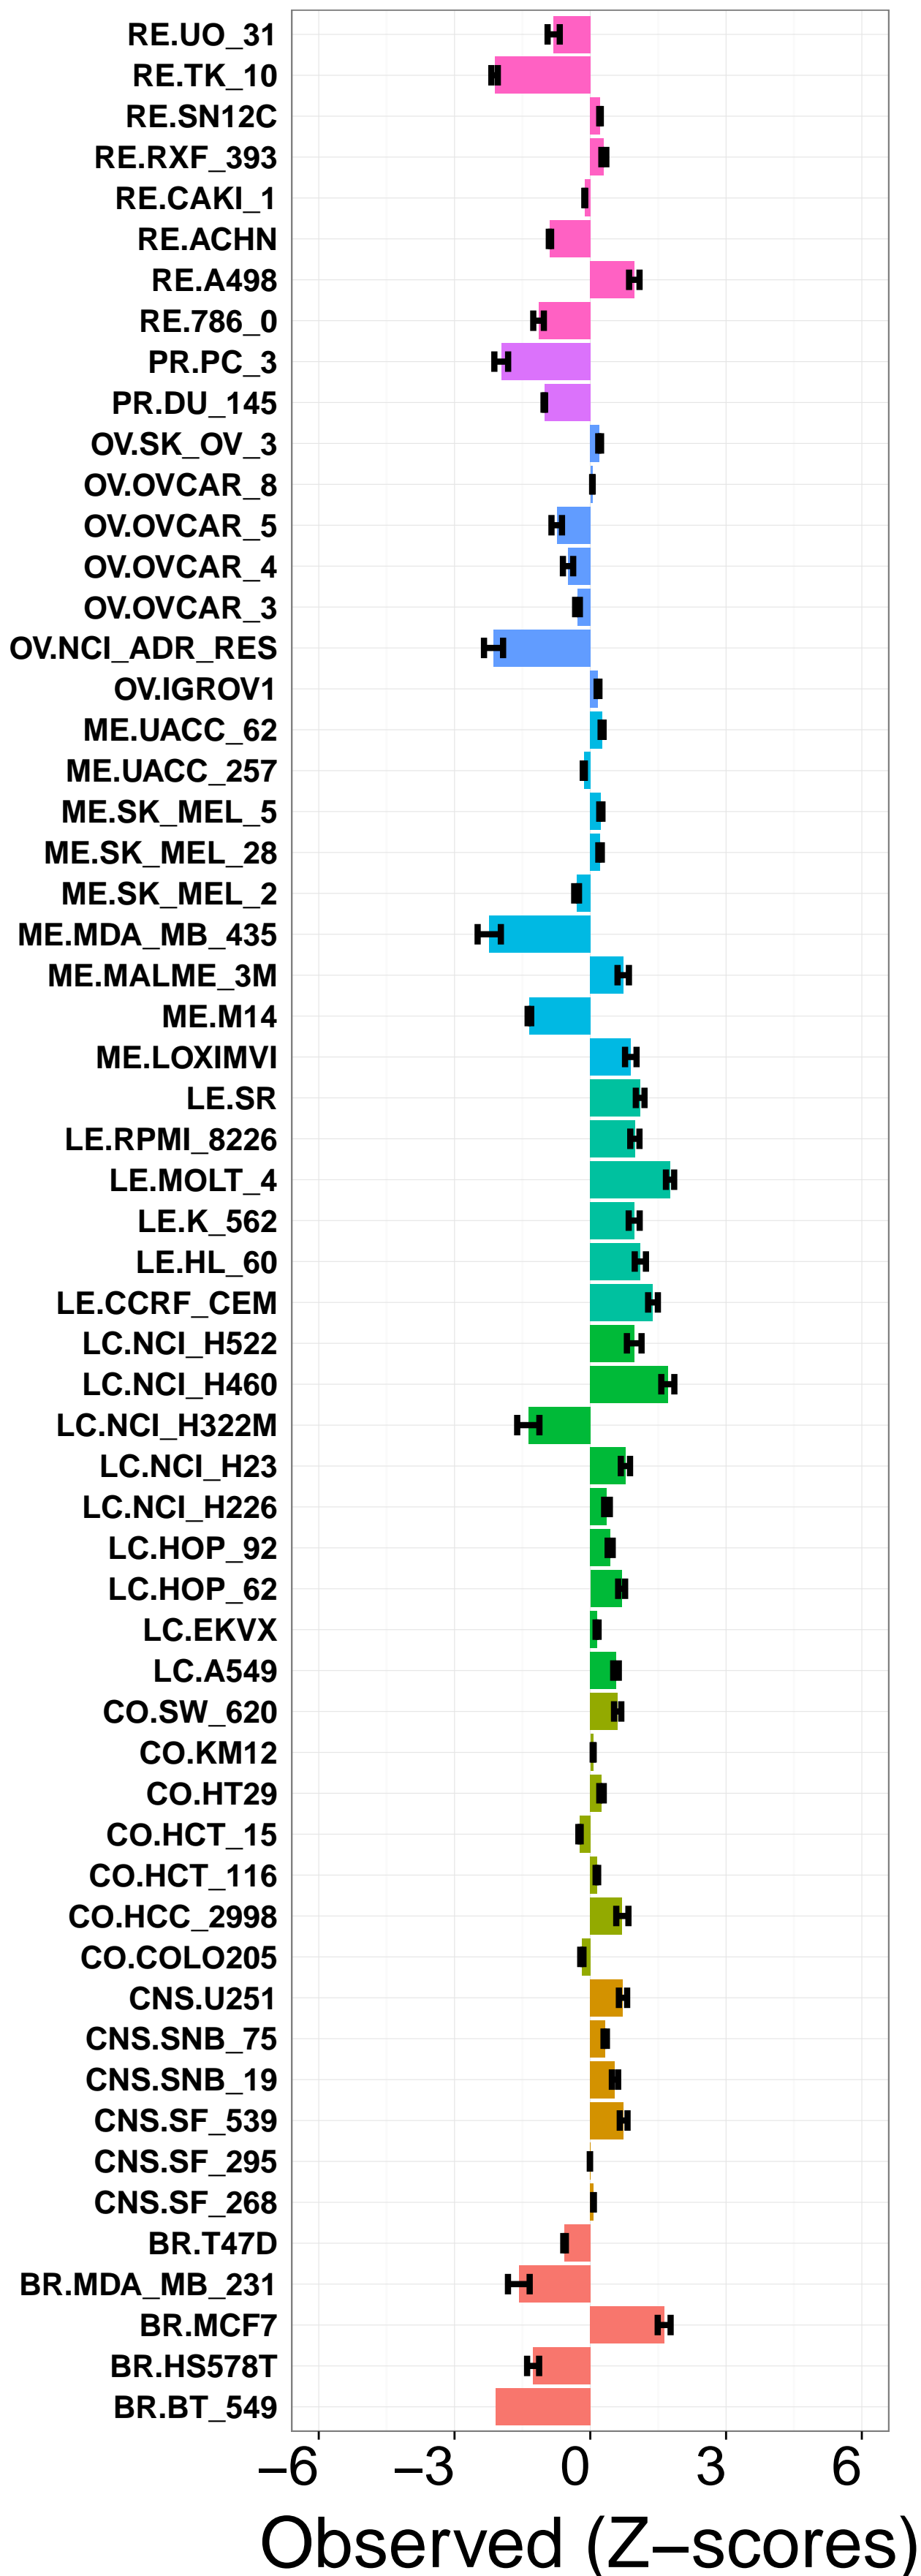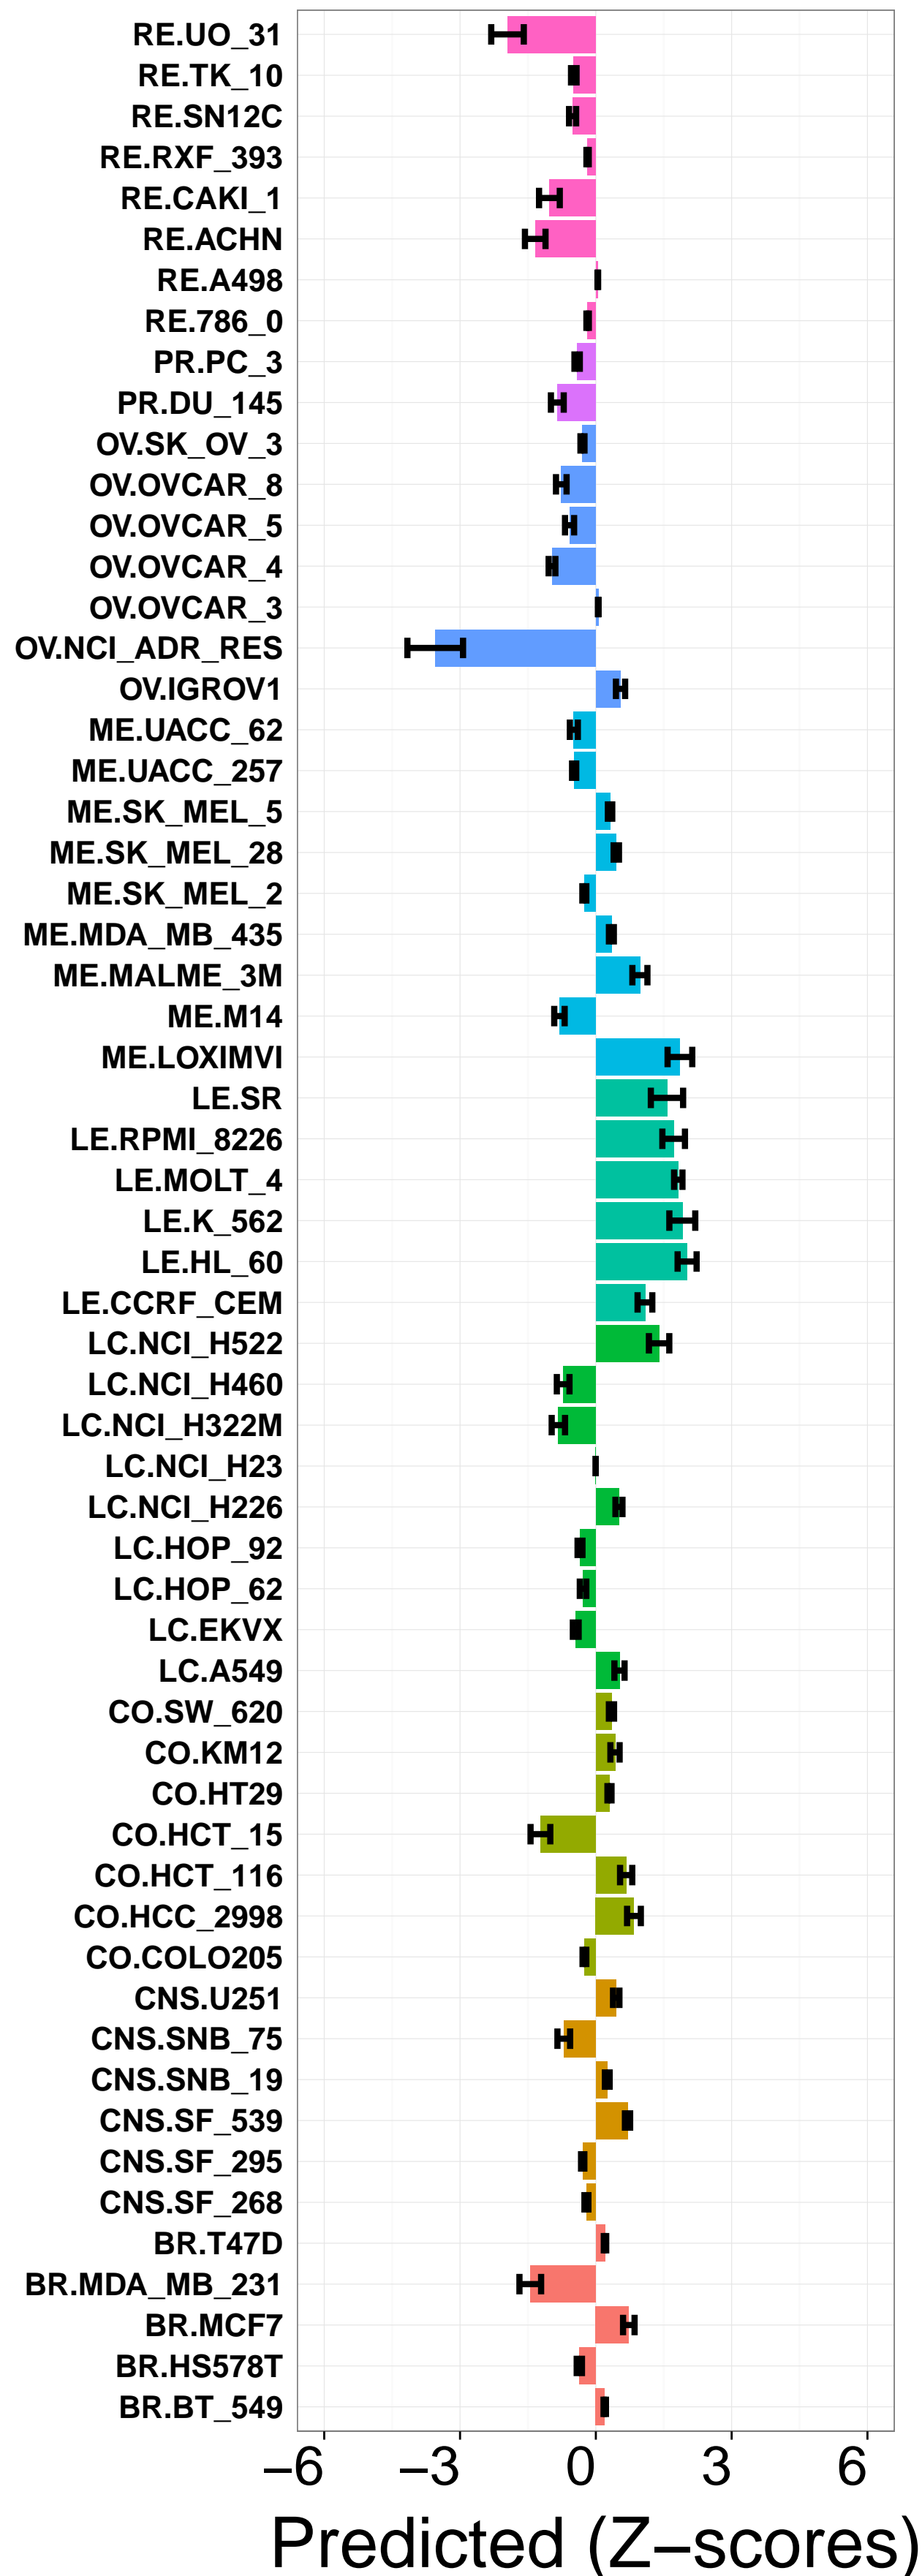



# NSC 174939, (Interpolation)

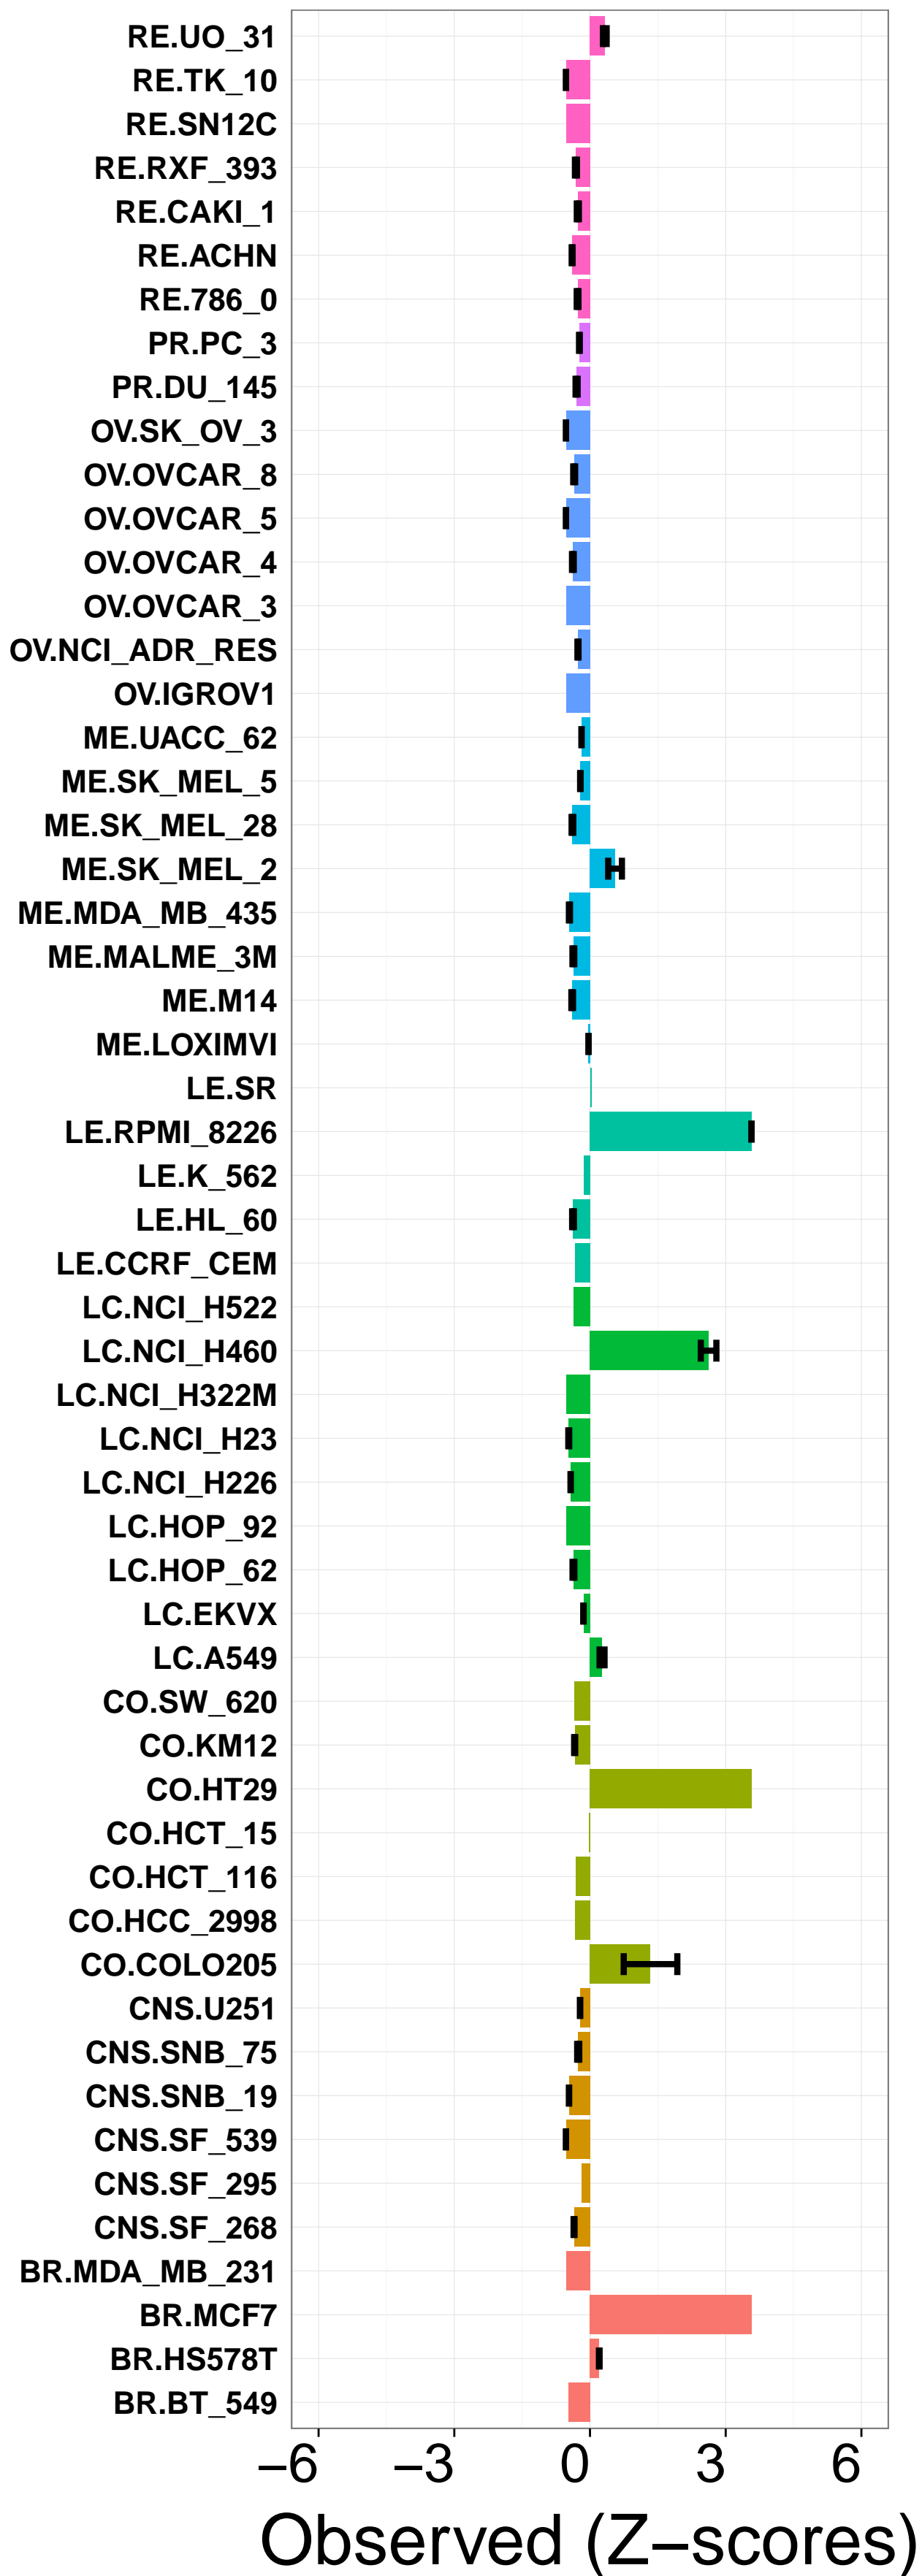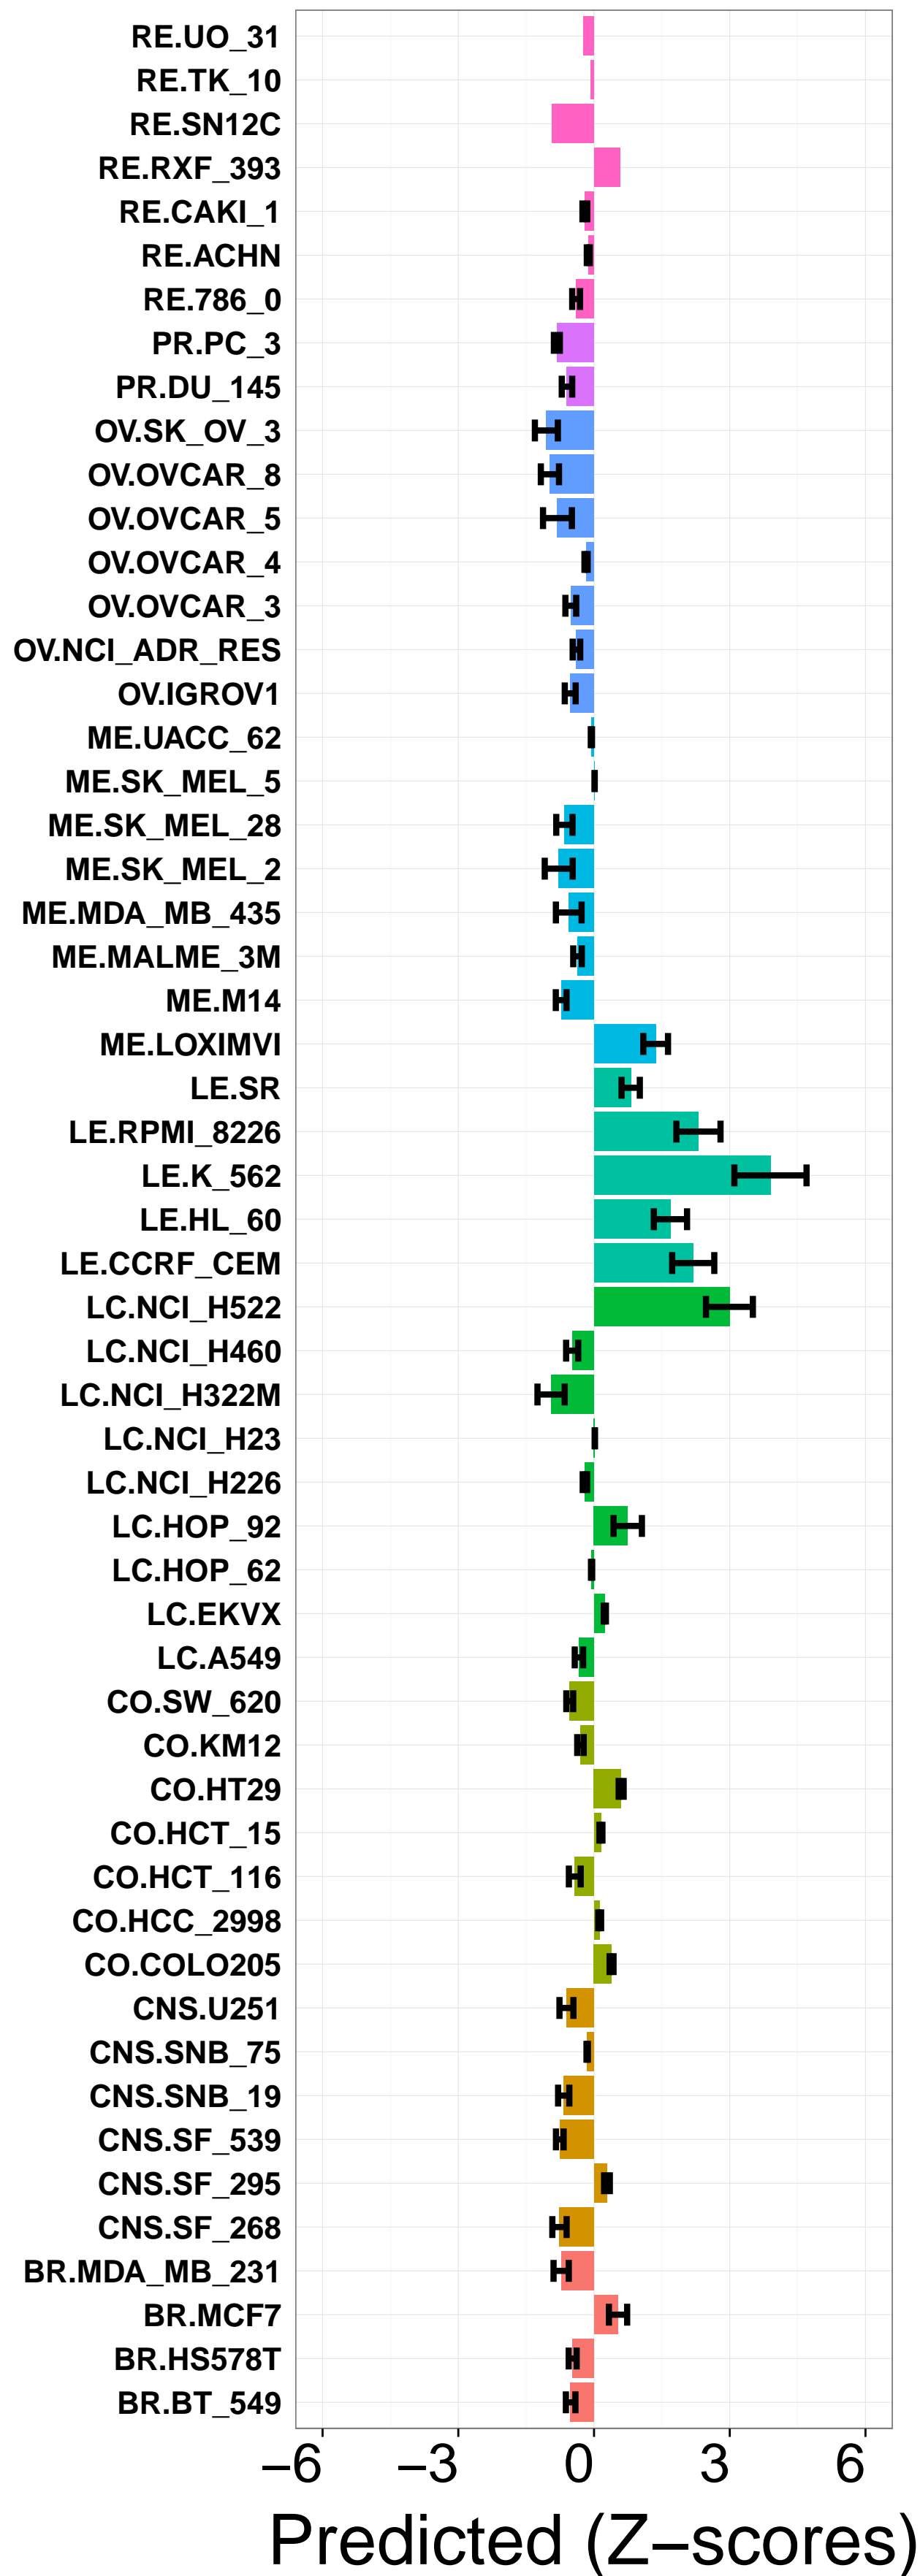

# NSC 19893, Fluorouracil (Interpolation)

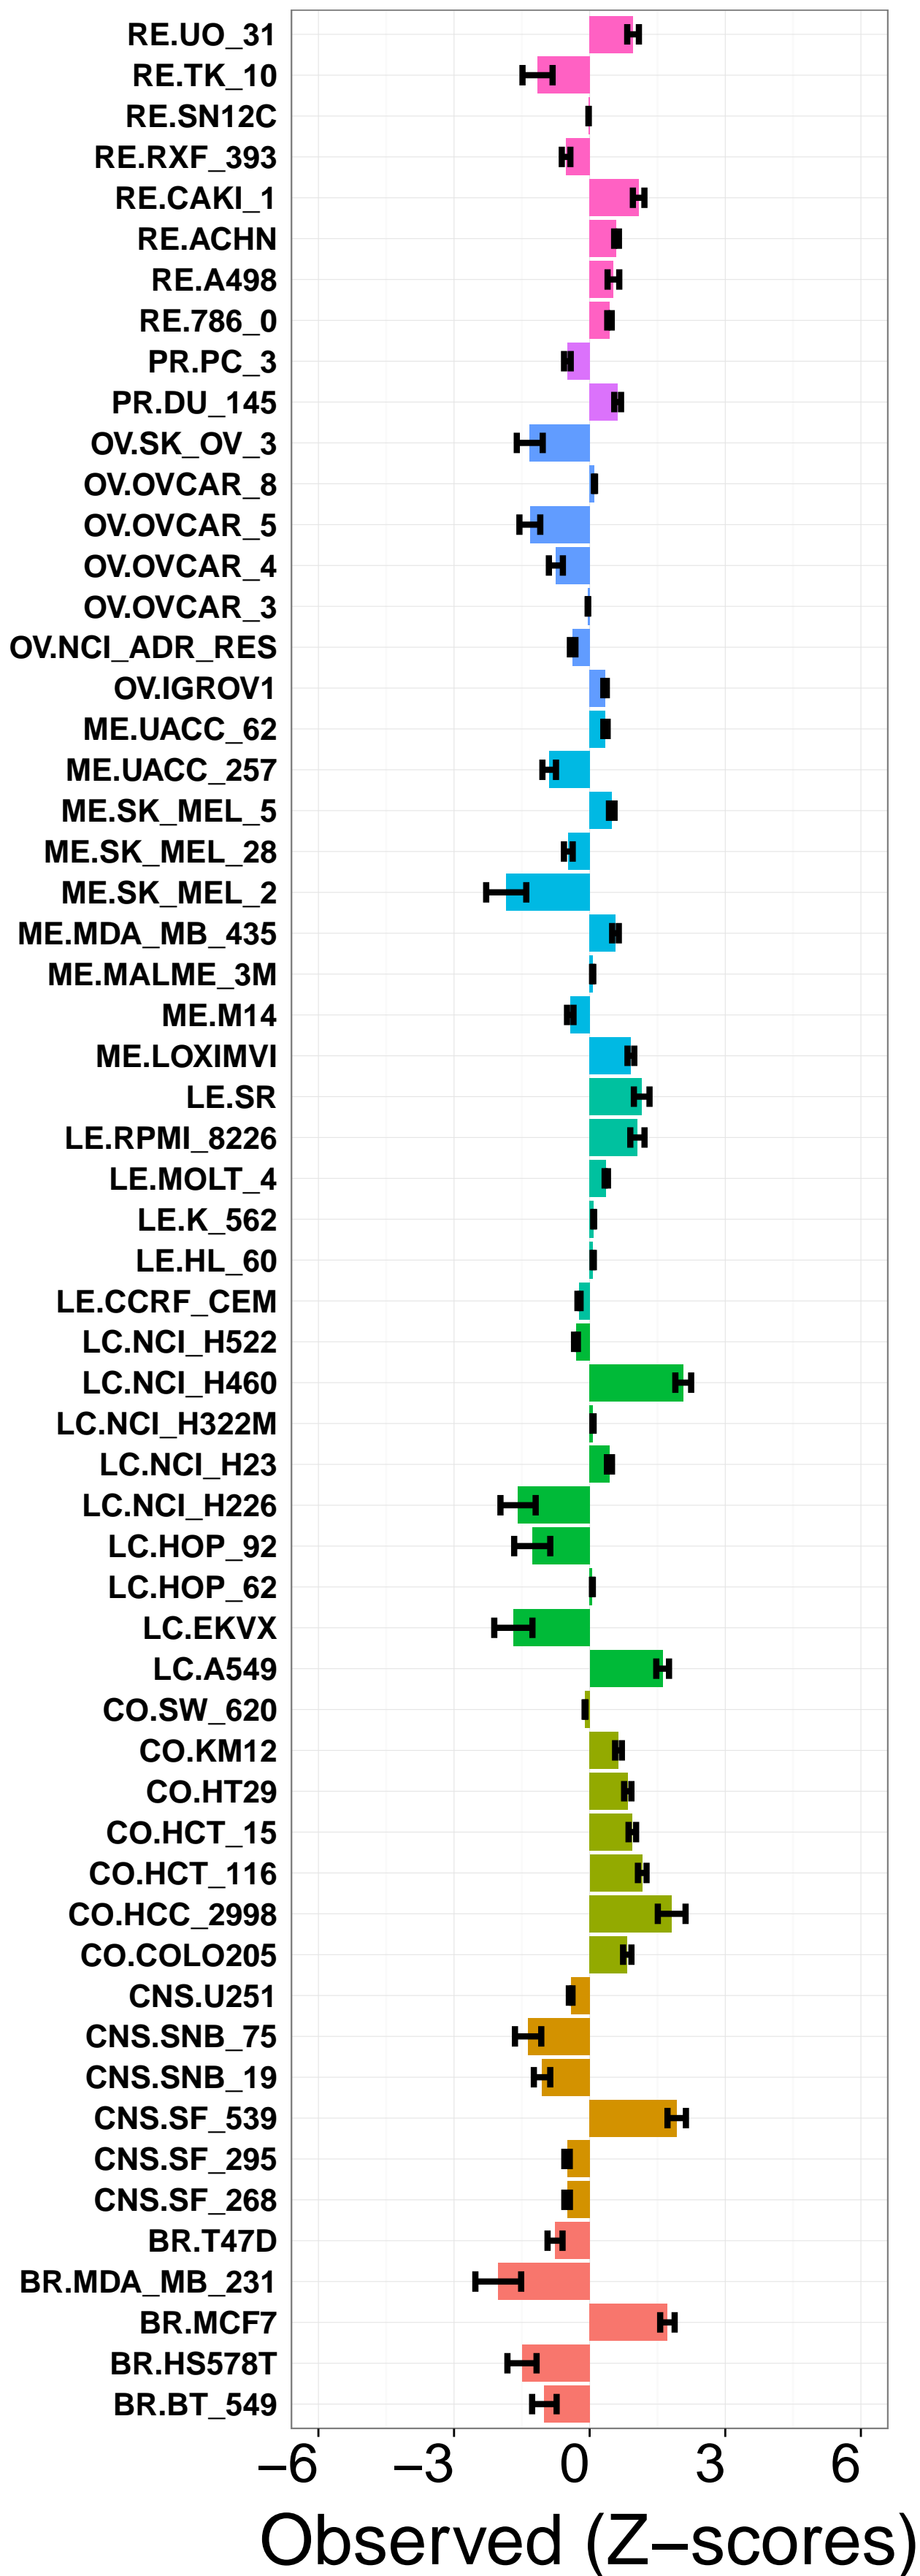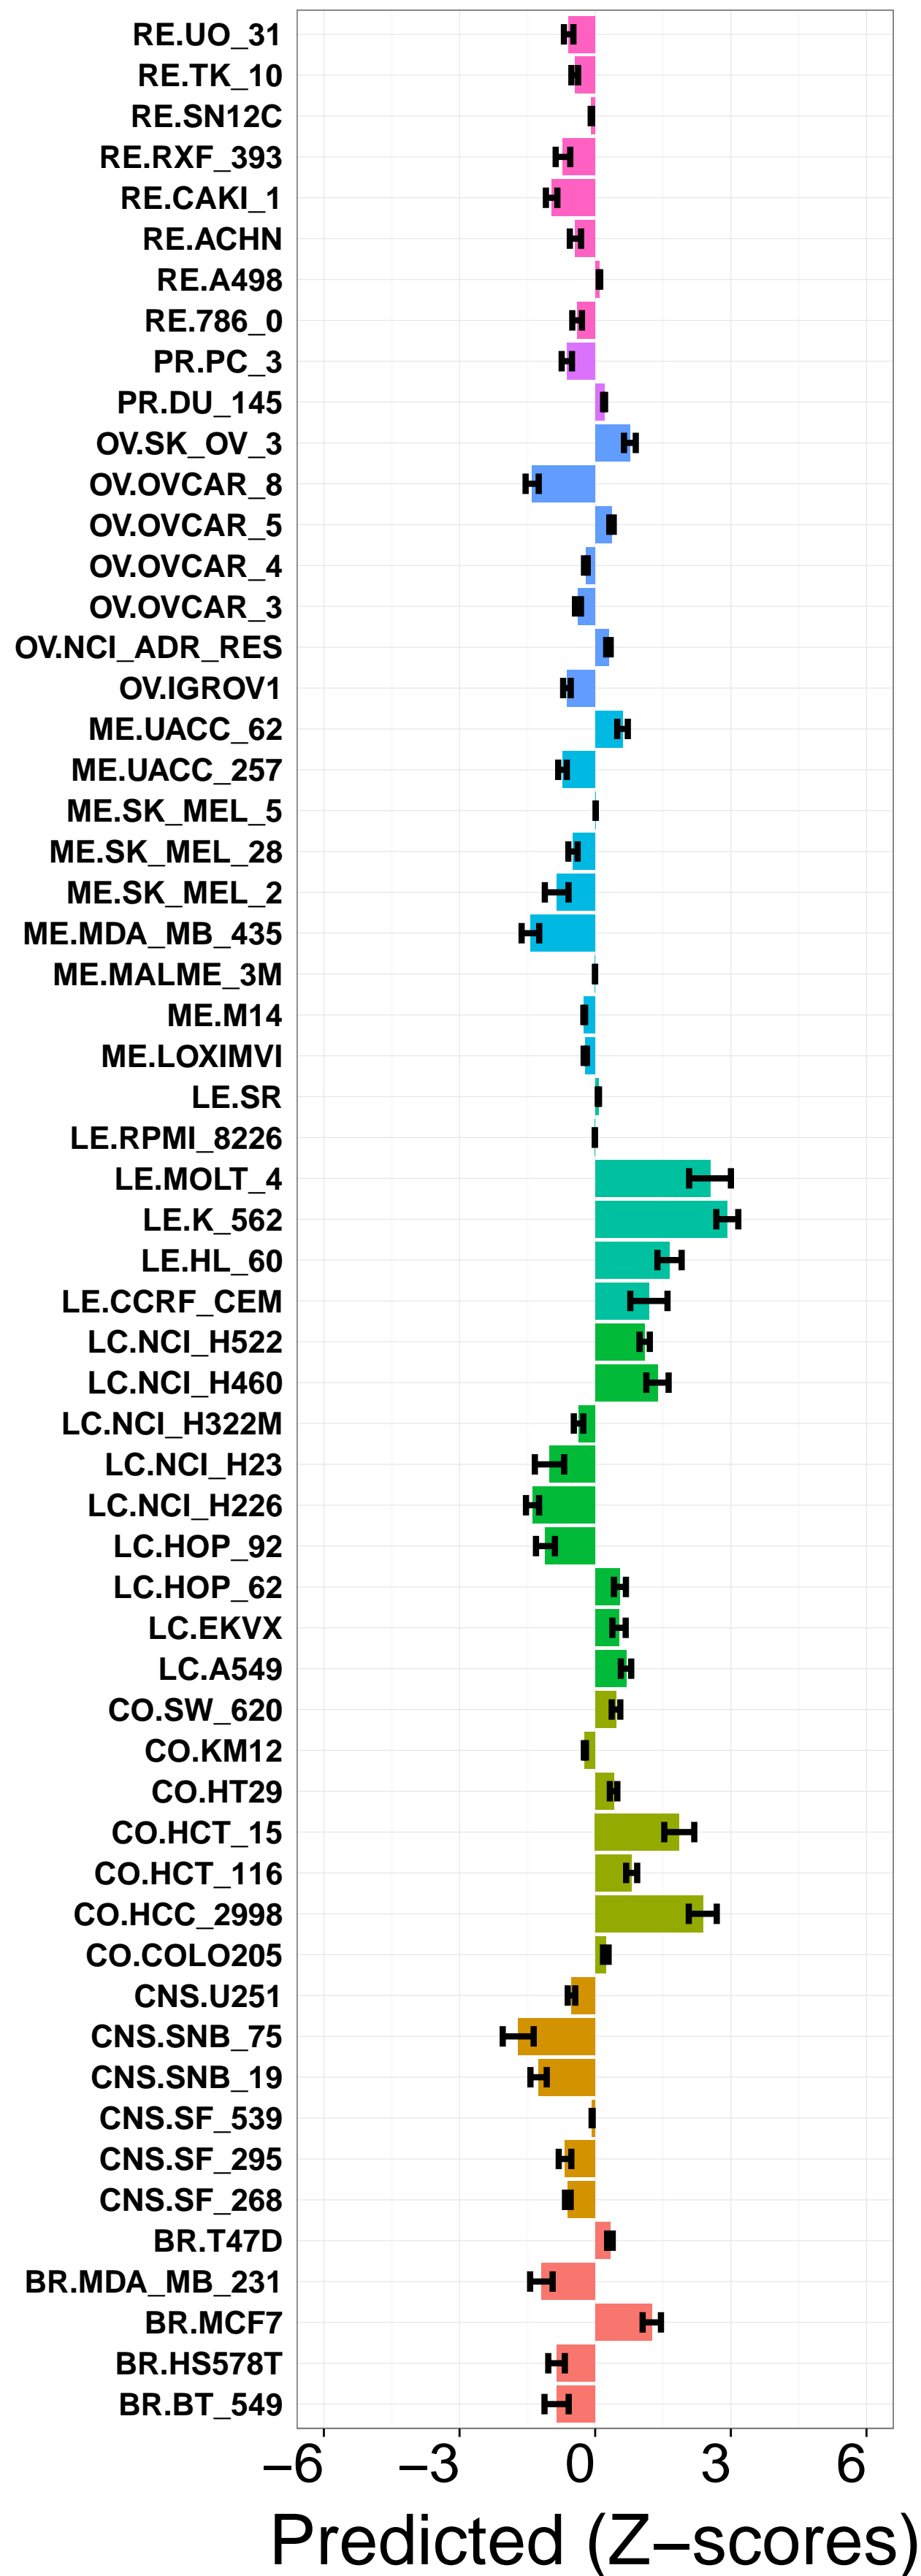

# NSC 221019, (Interpolation)

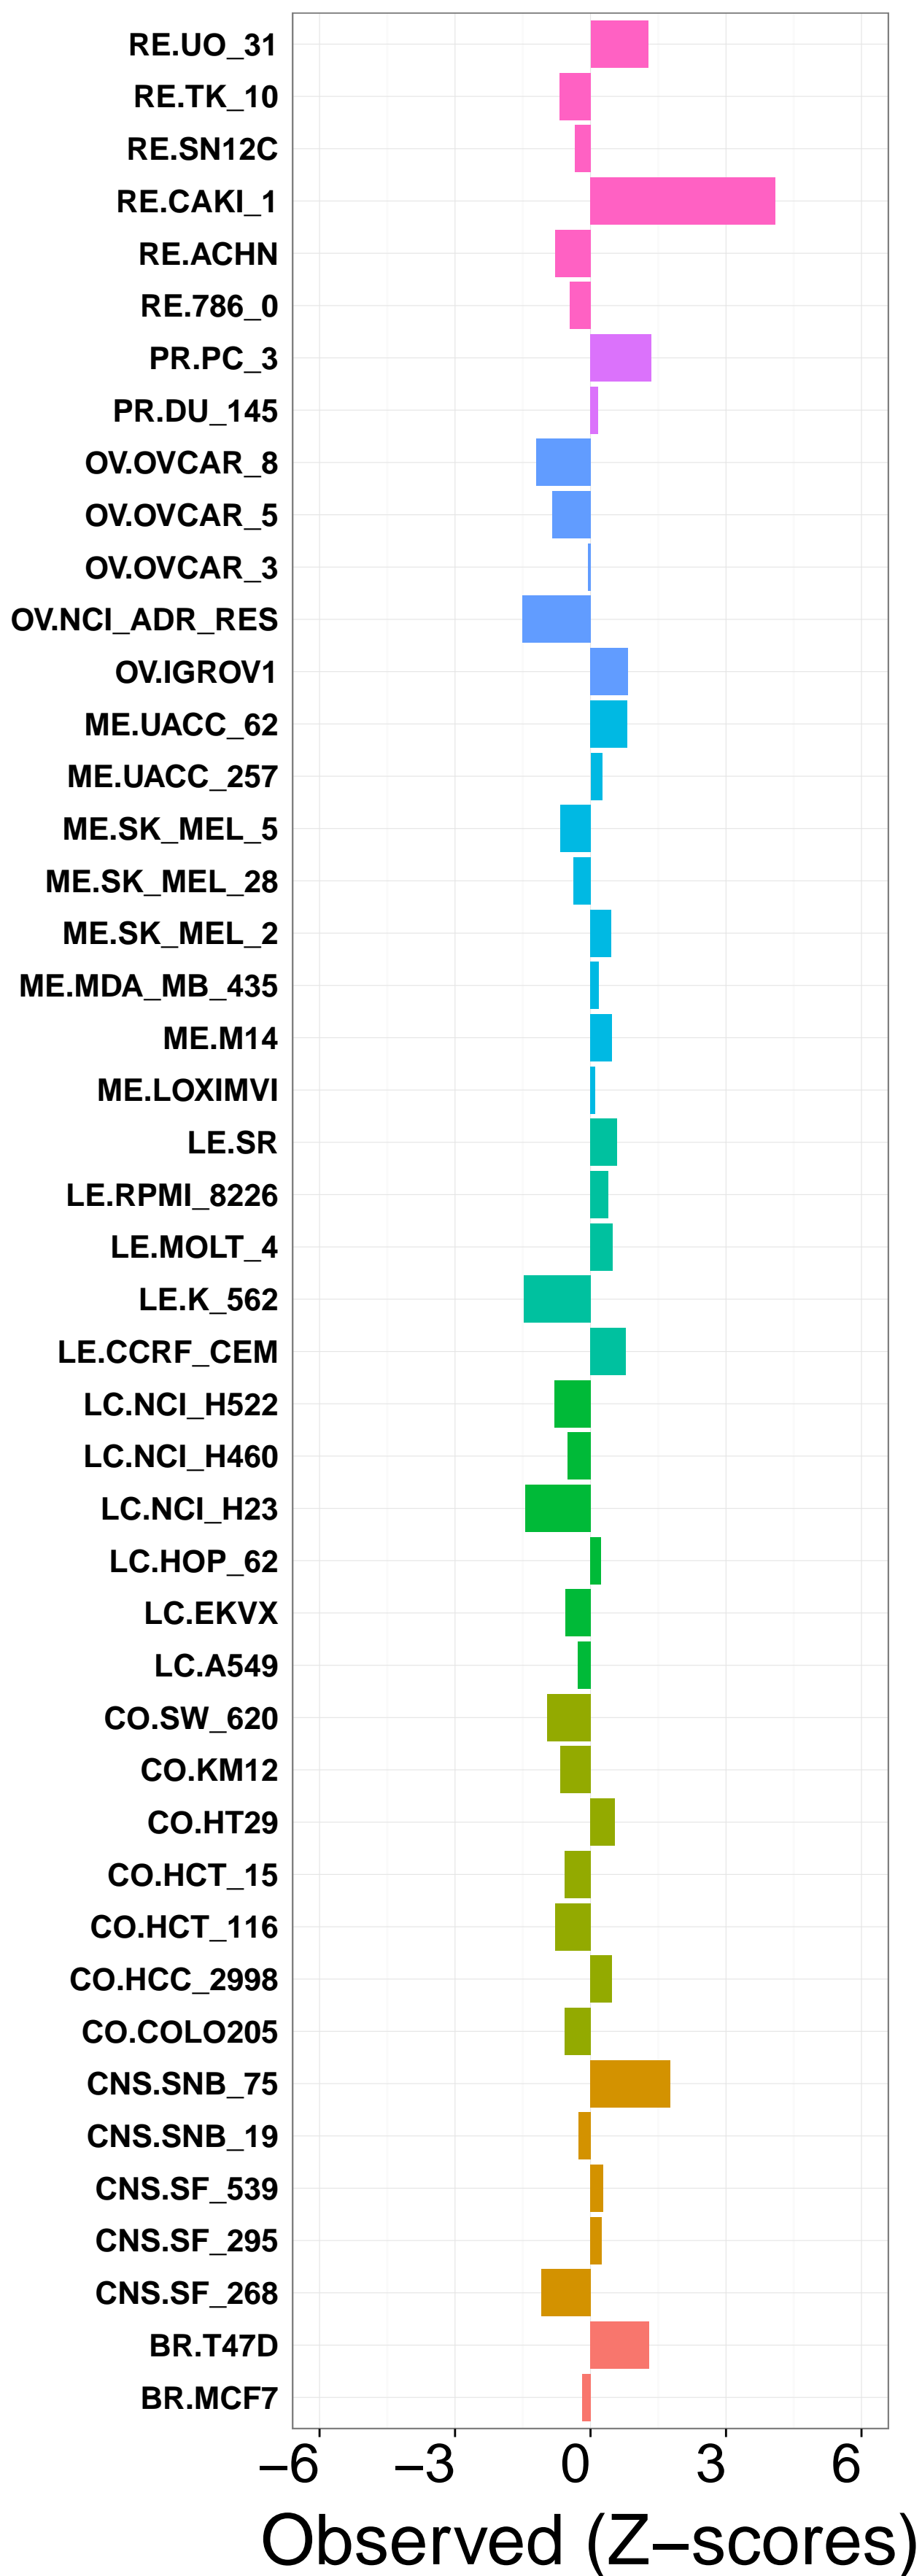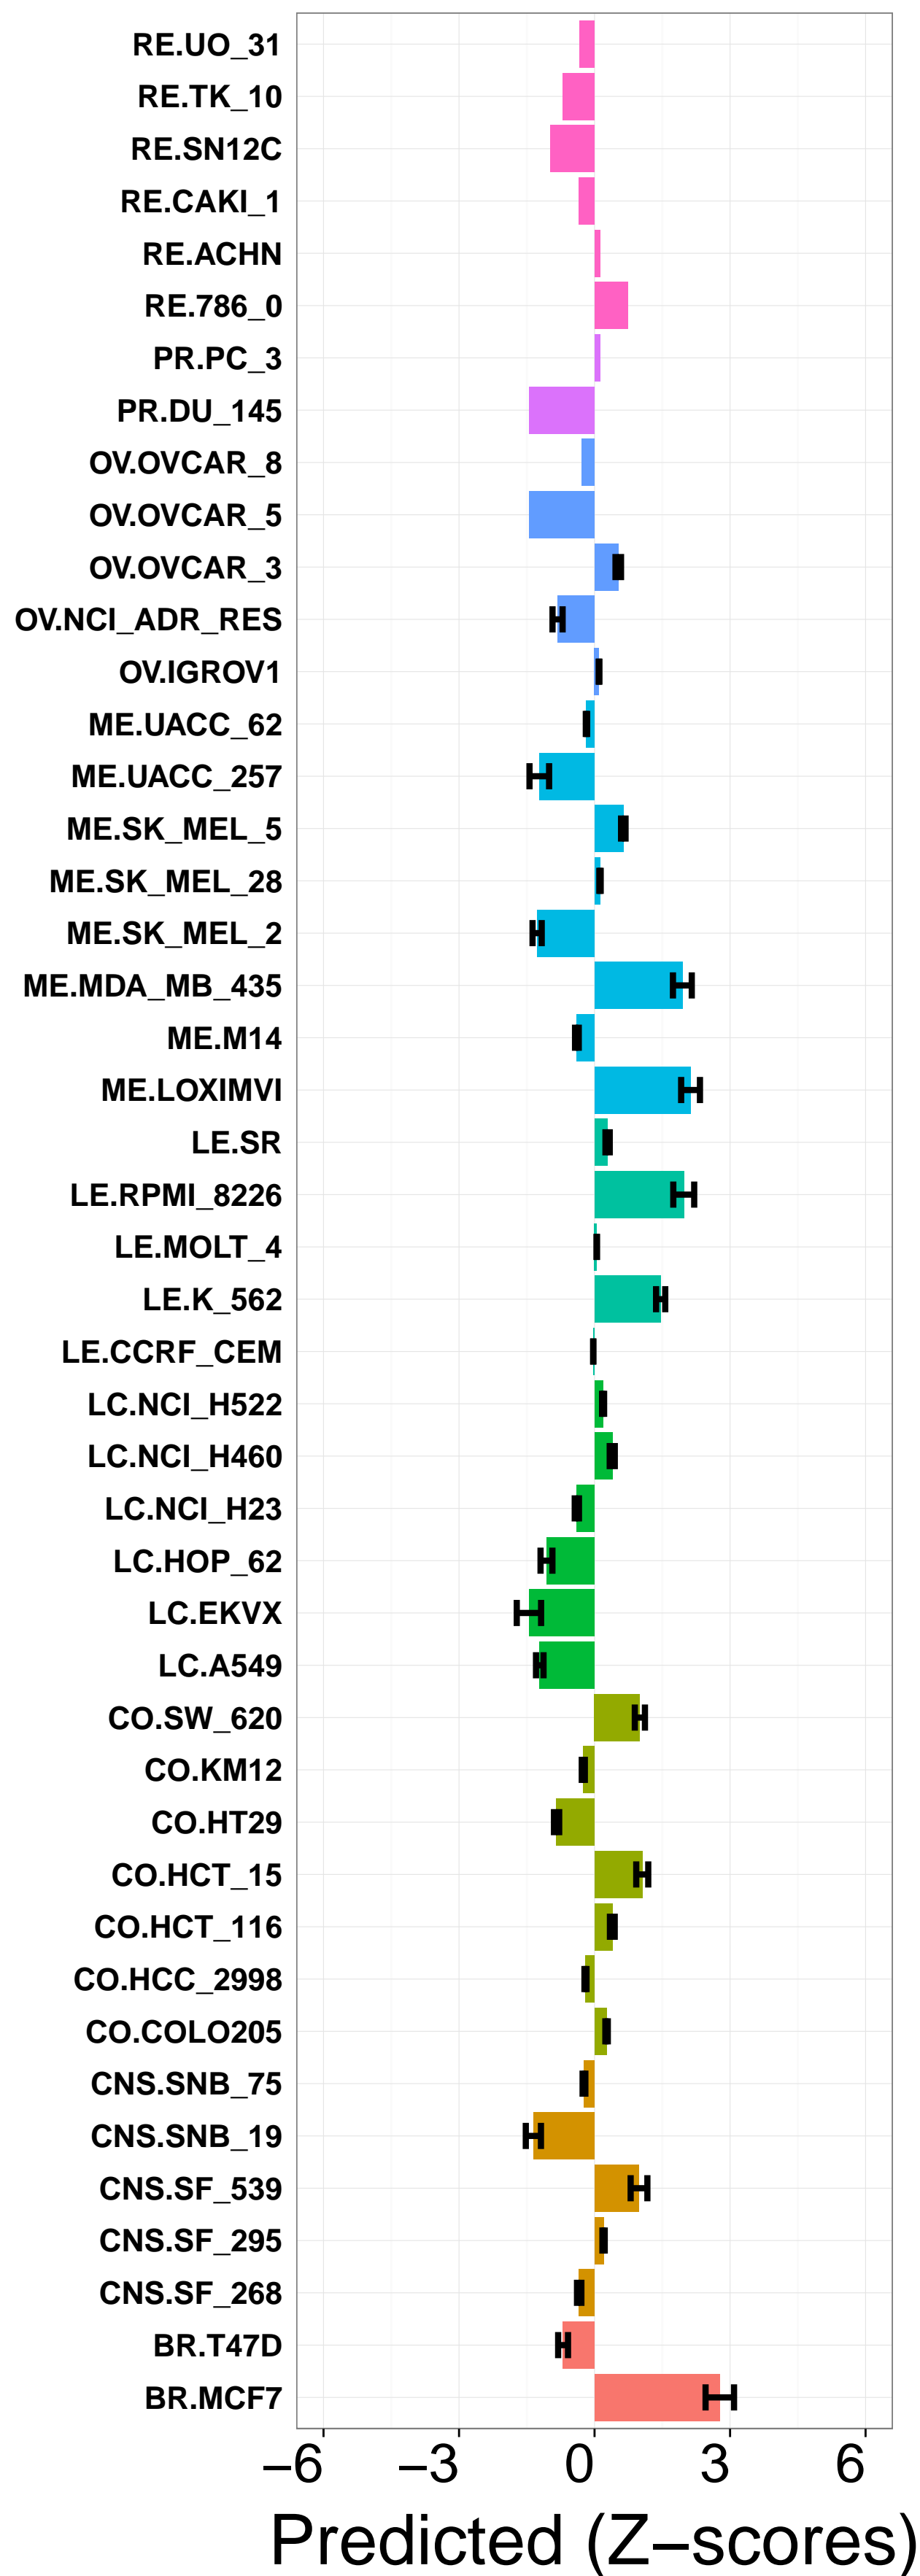

# NSC 246131, (Interpolation)

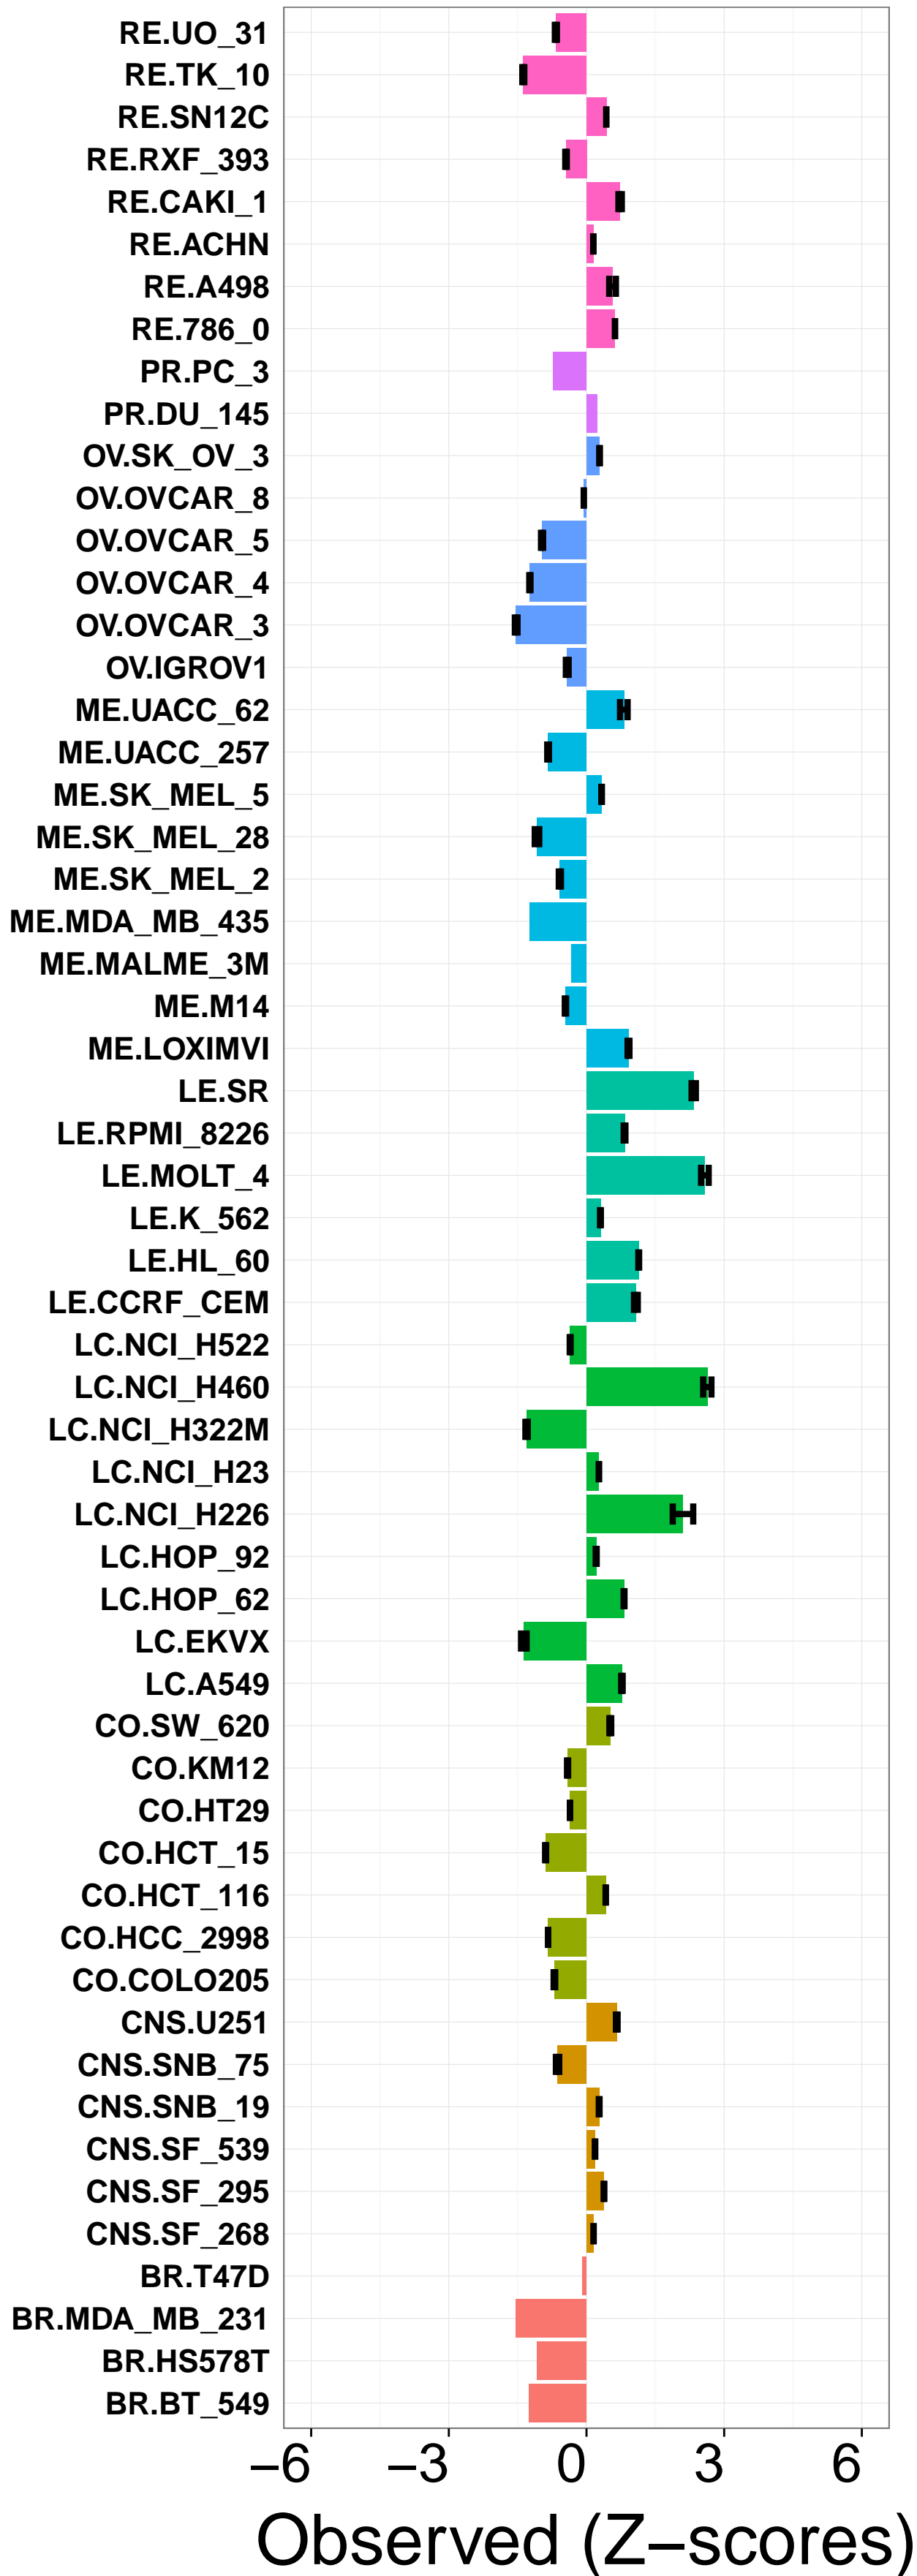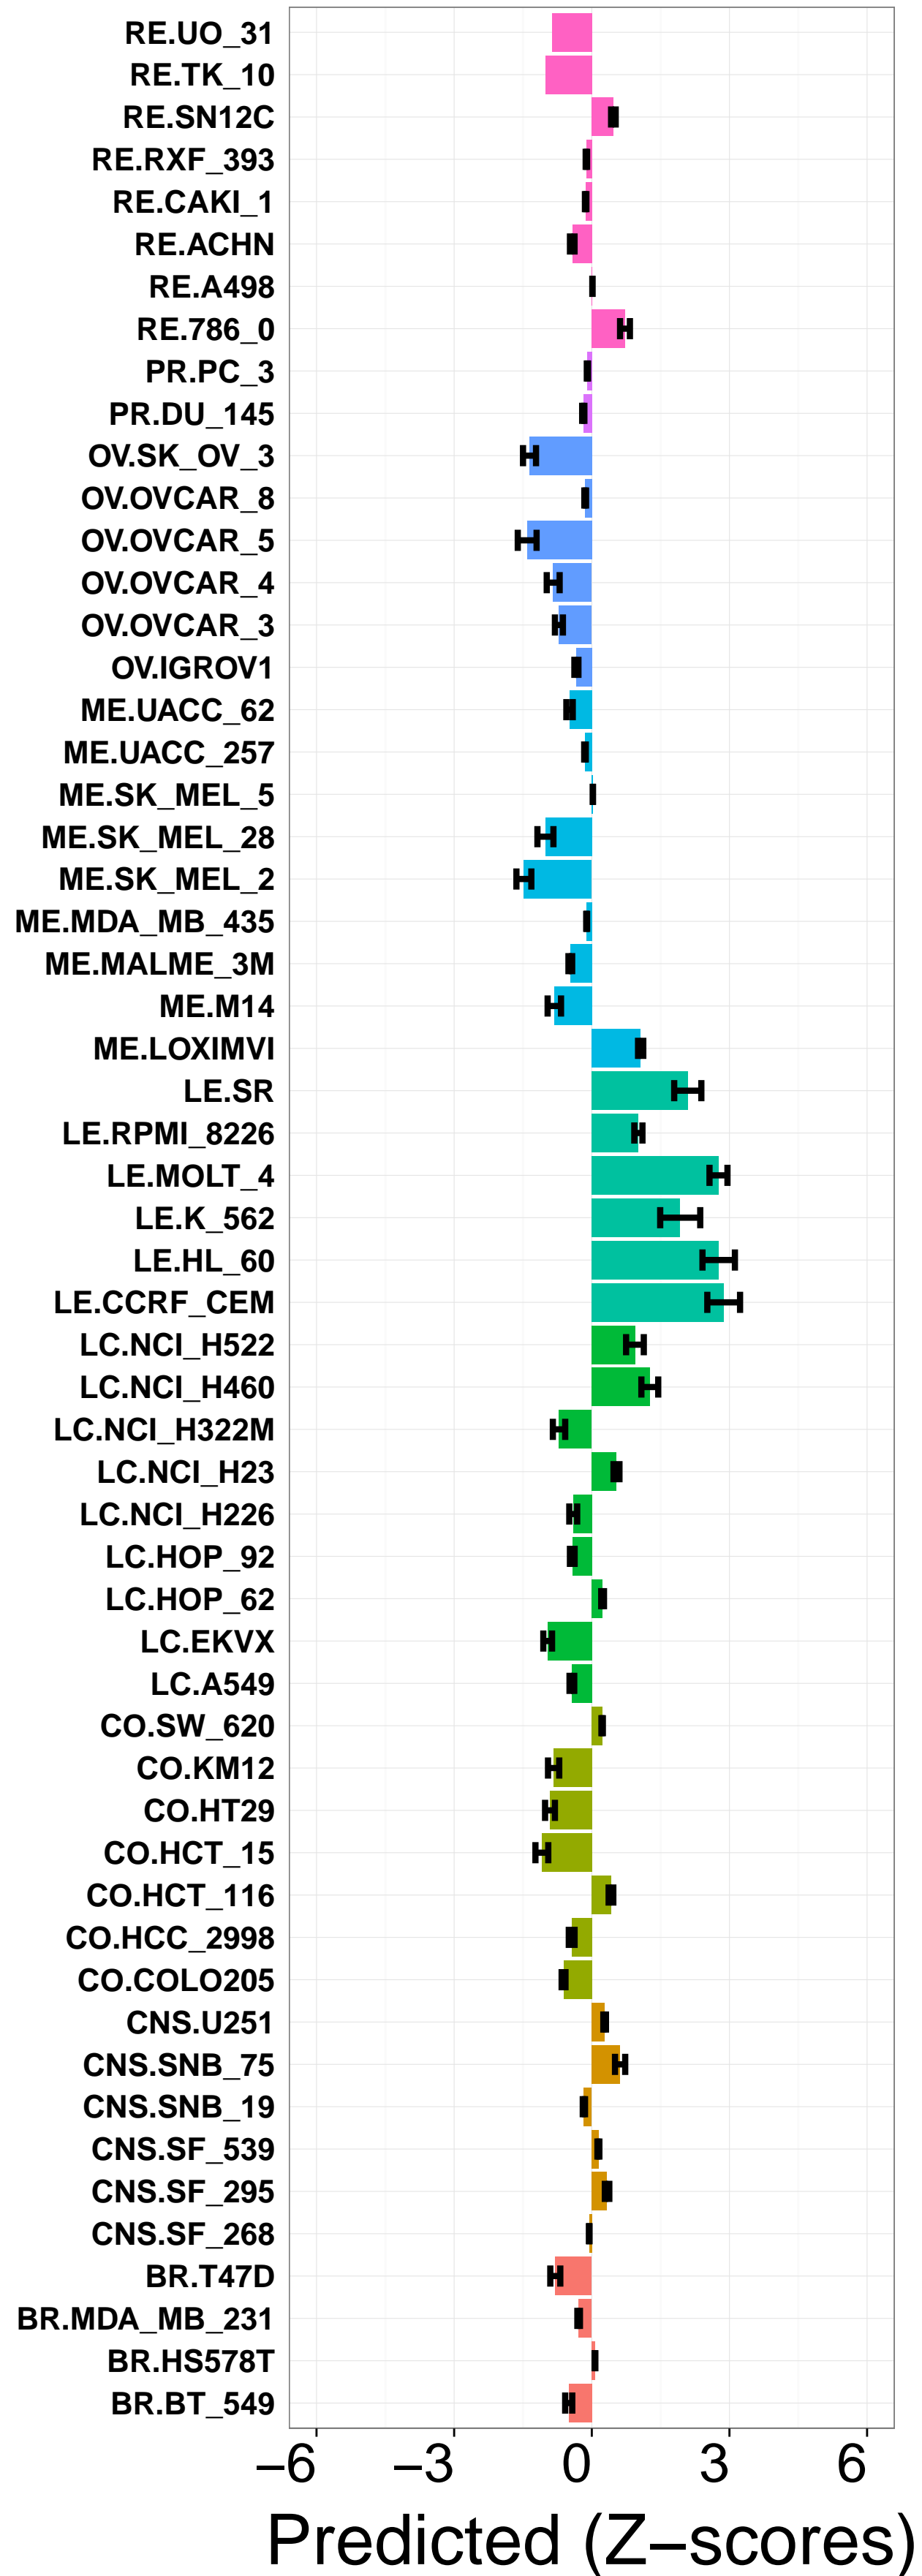

# NSC 255109, (Interpolation)

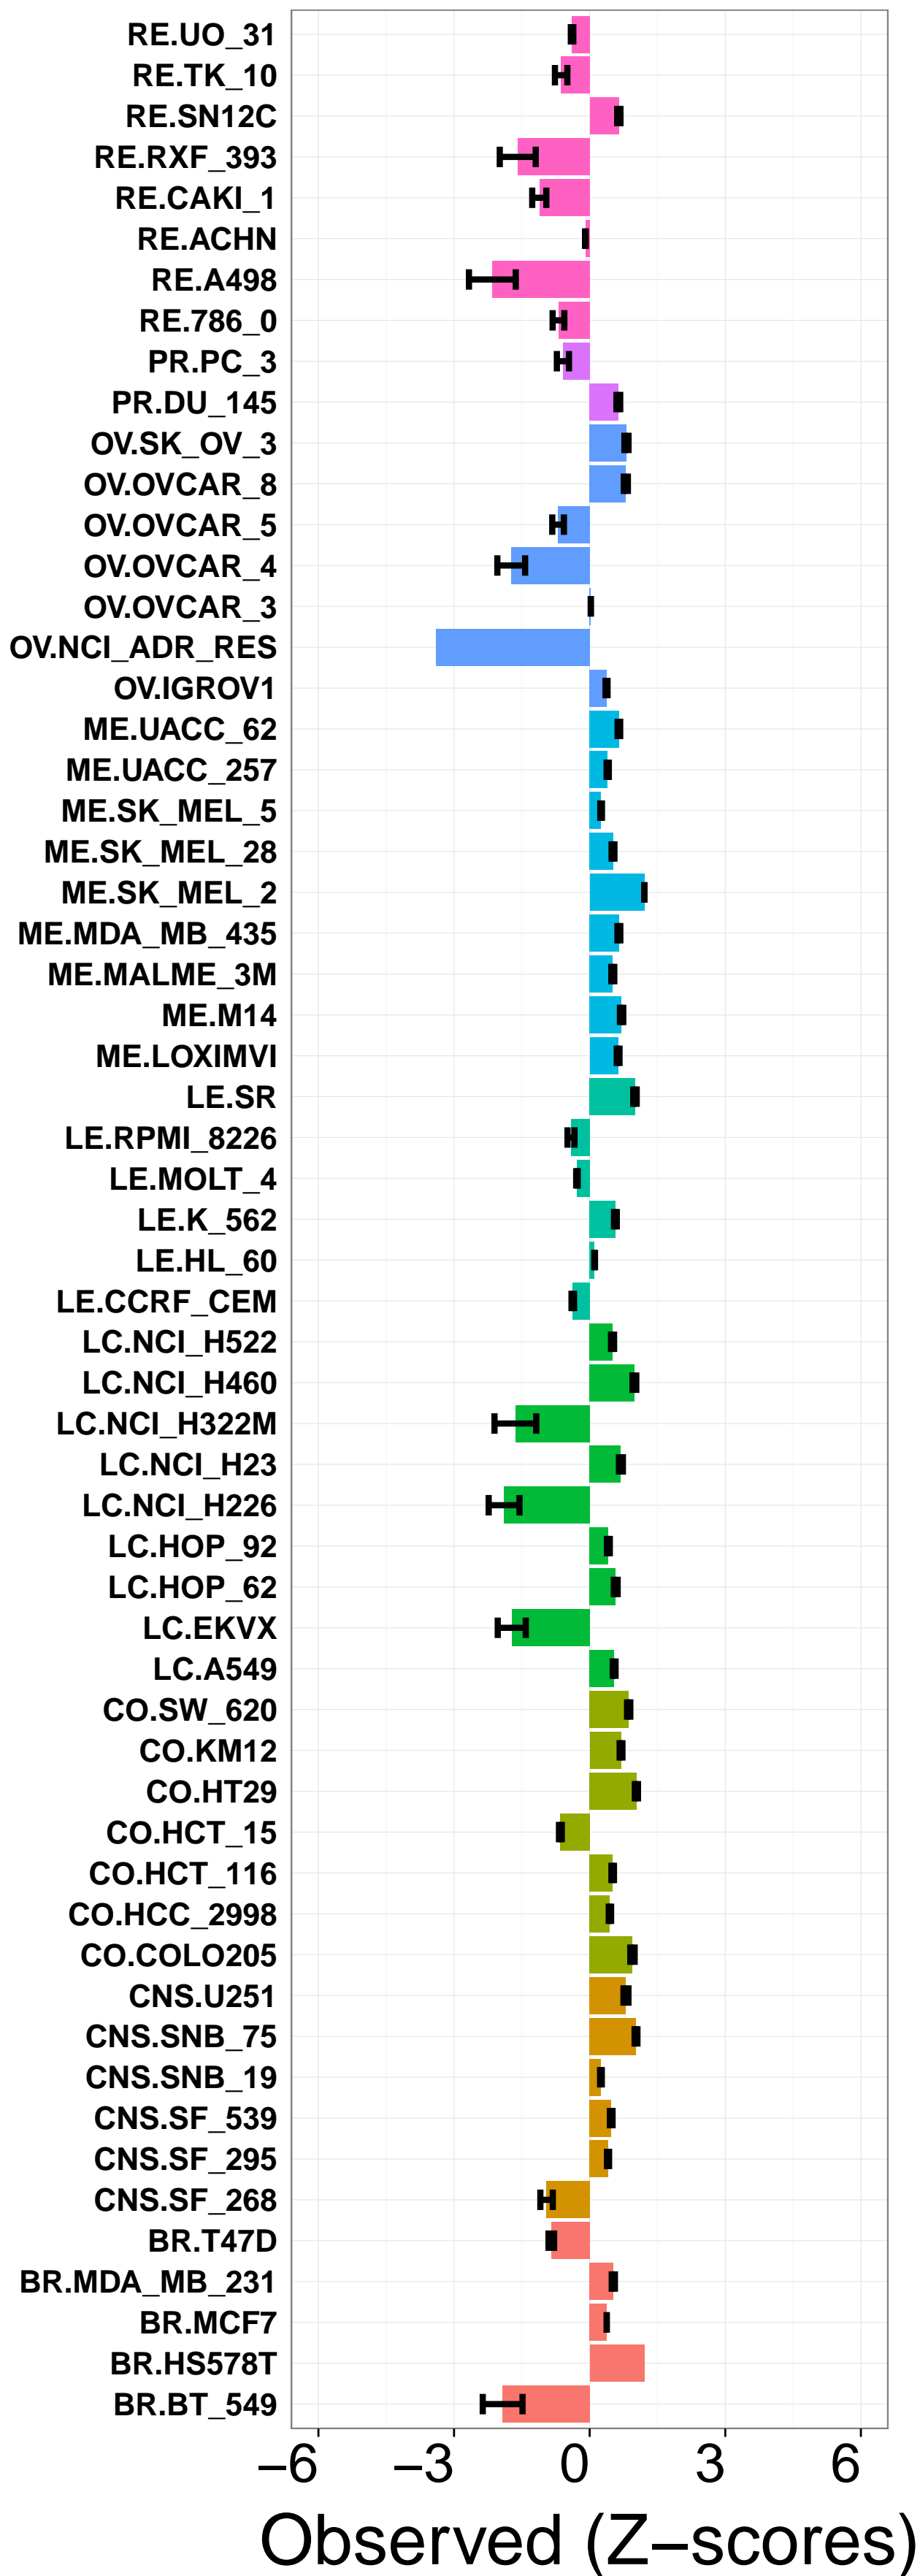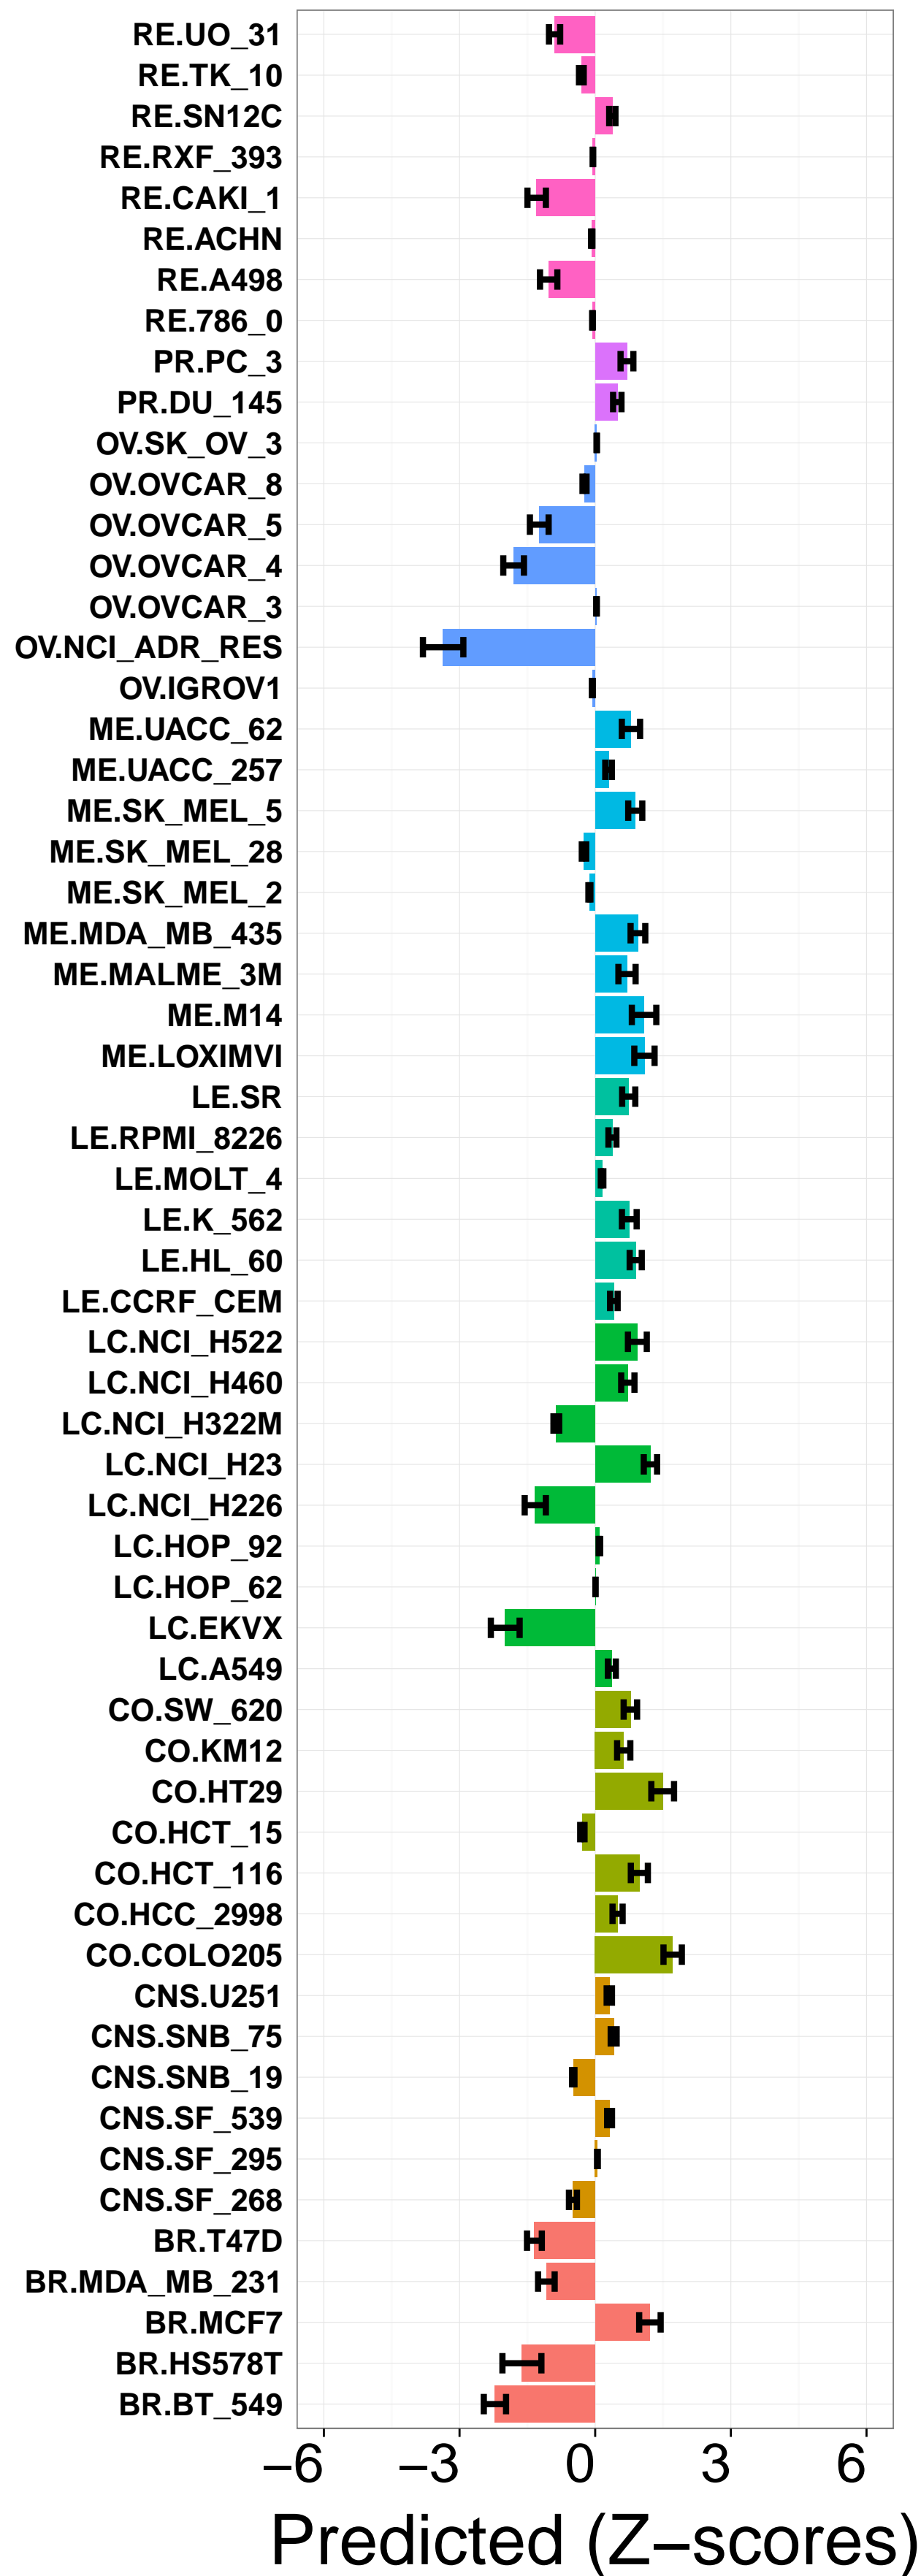



# NSC 256942, (Interpolation)

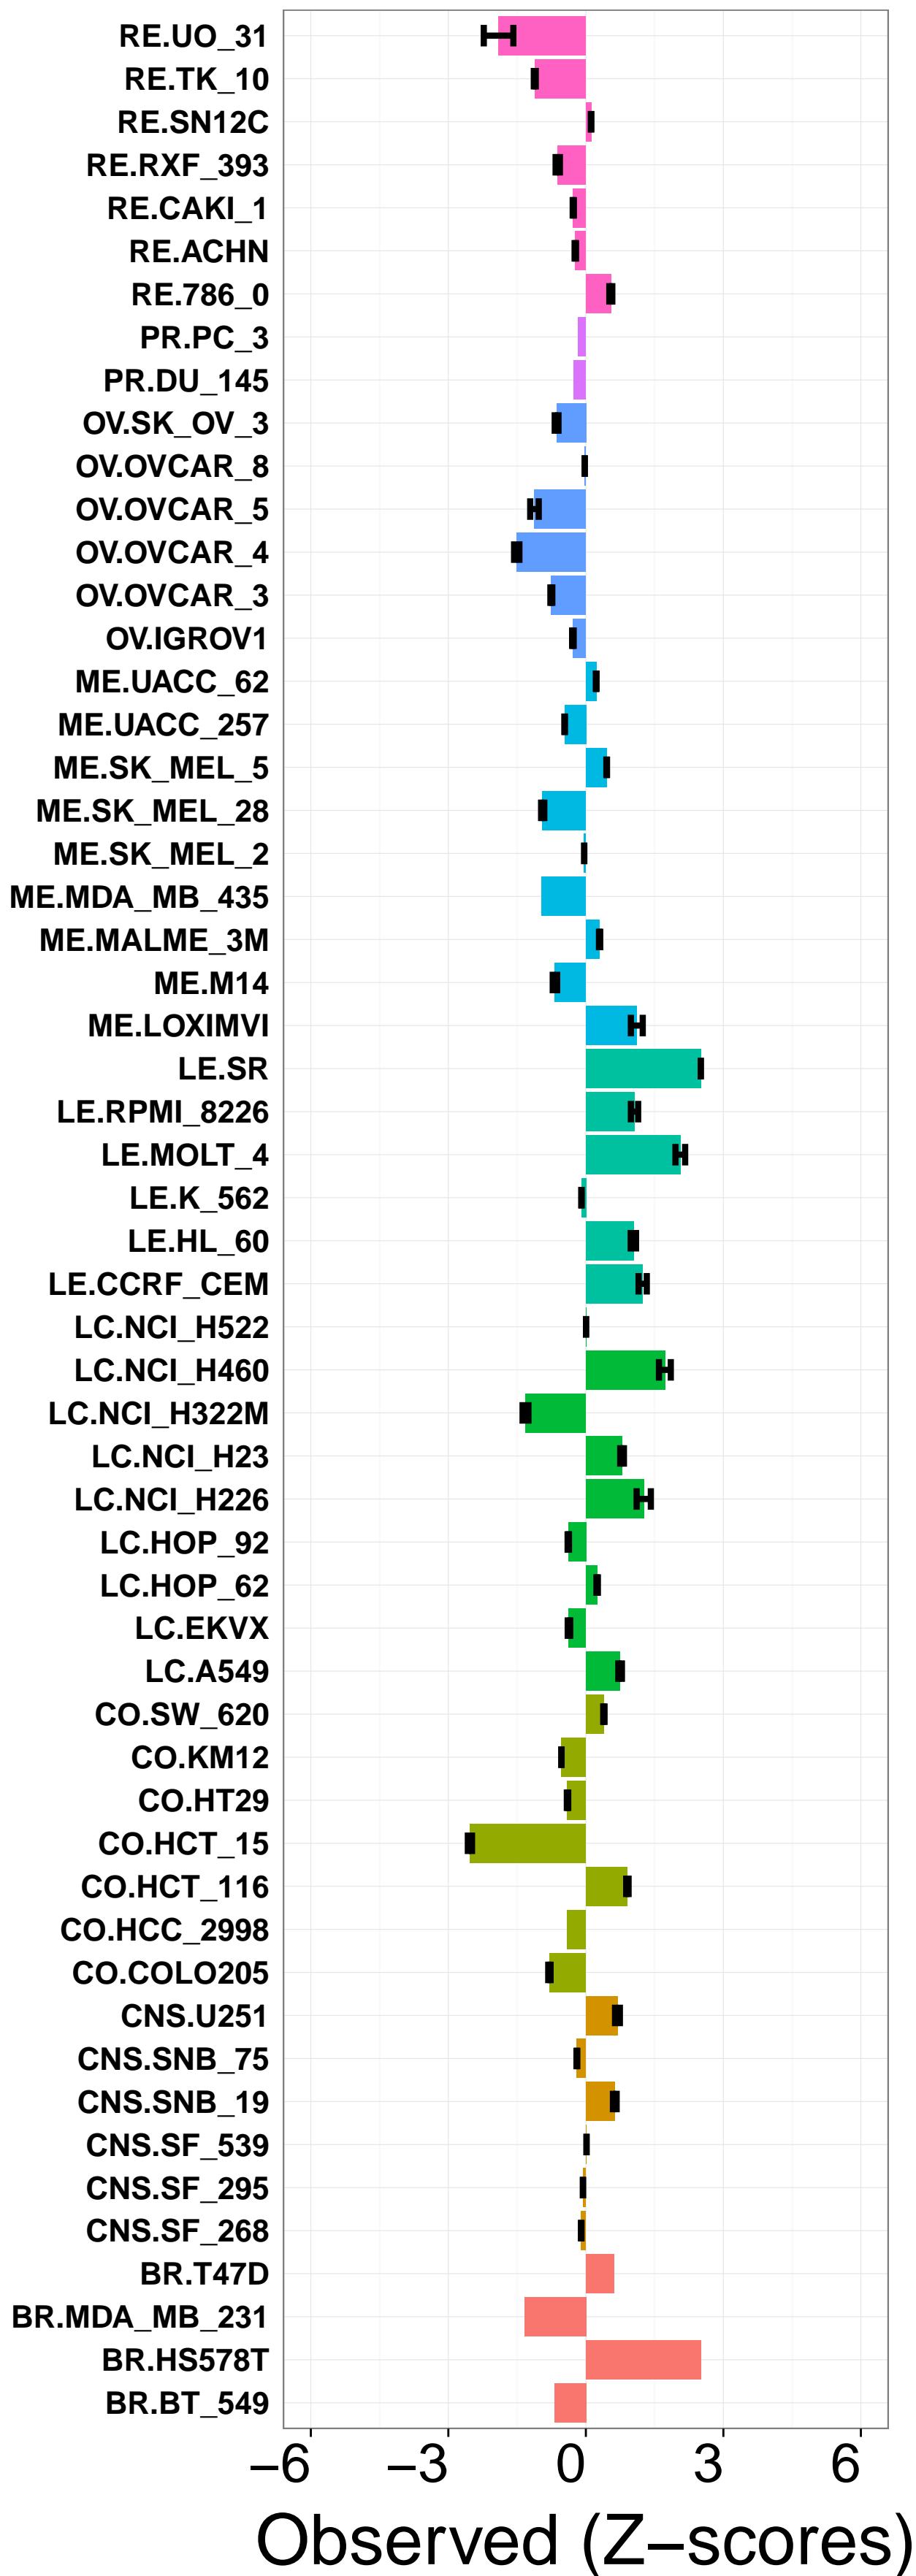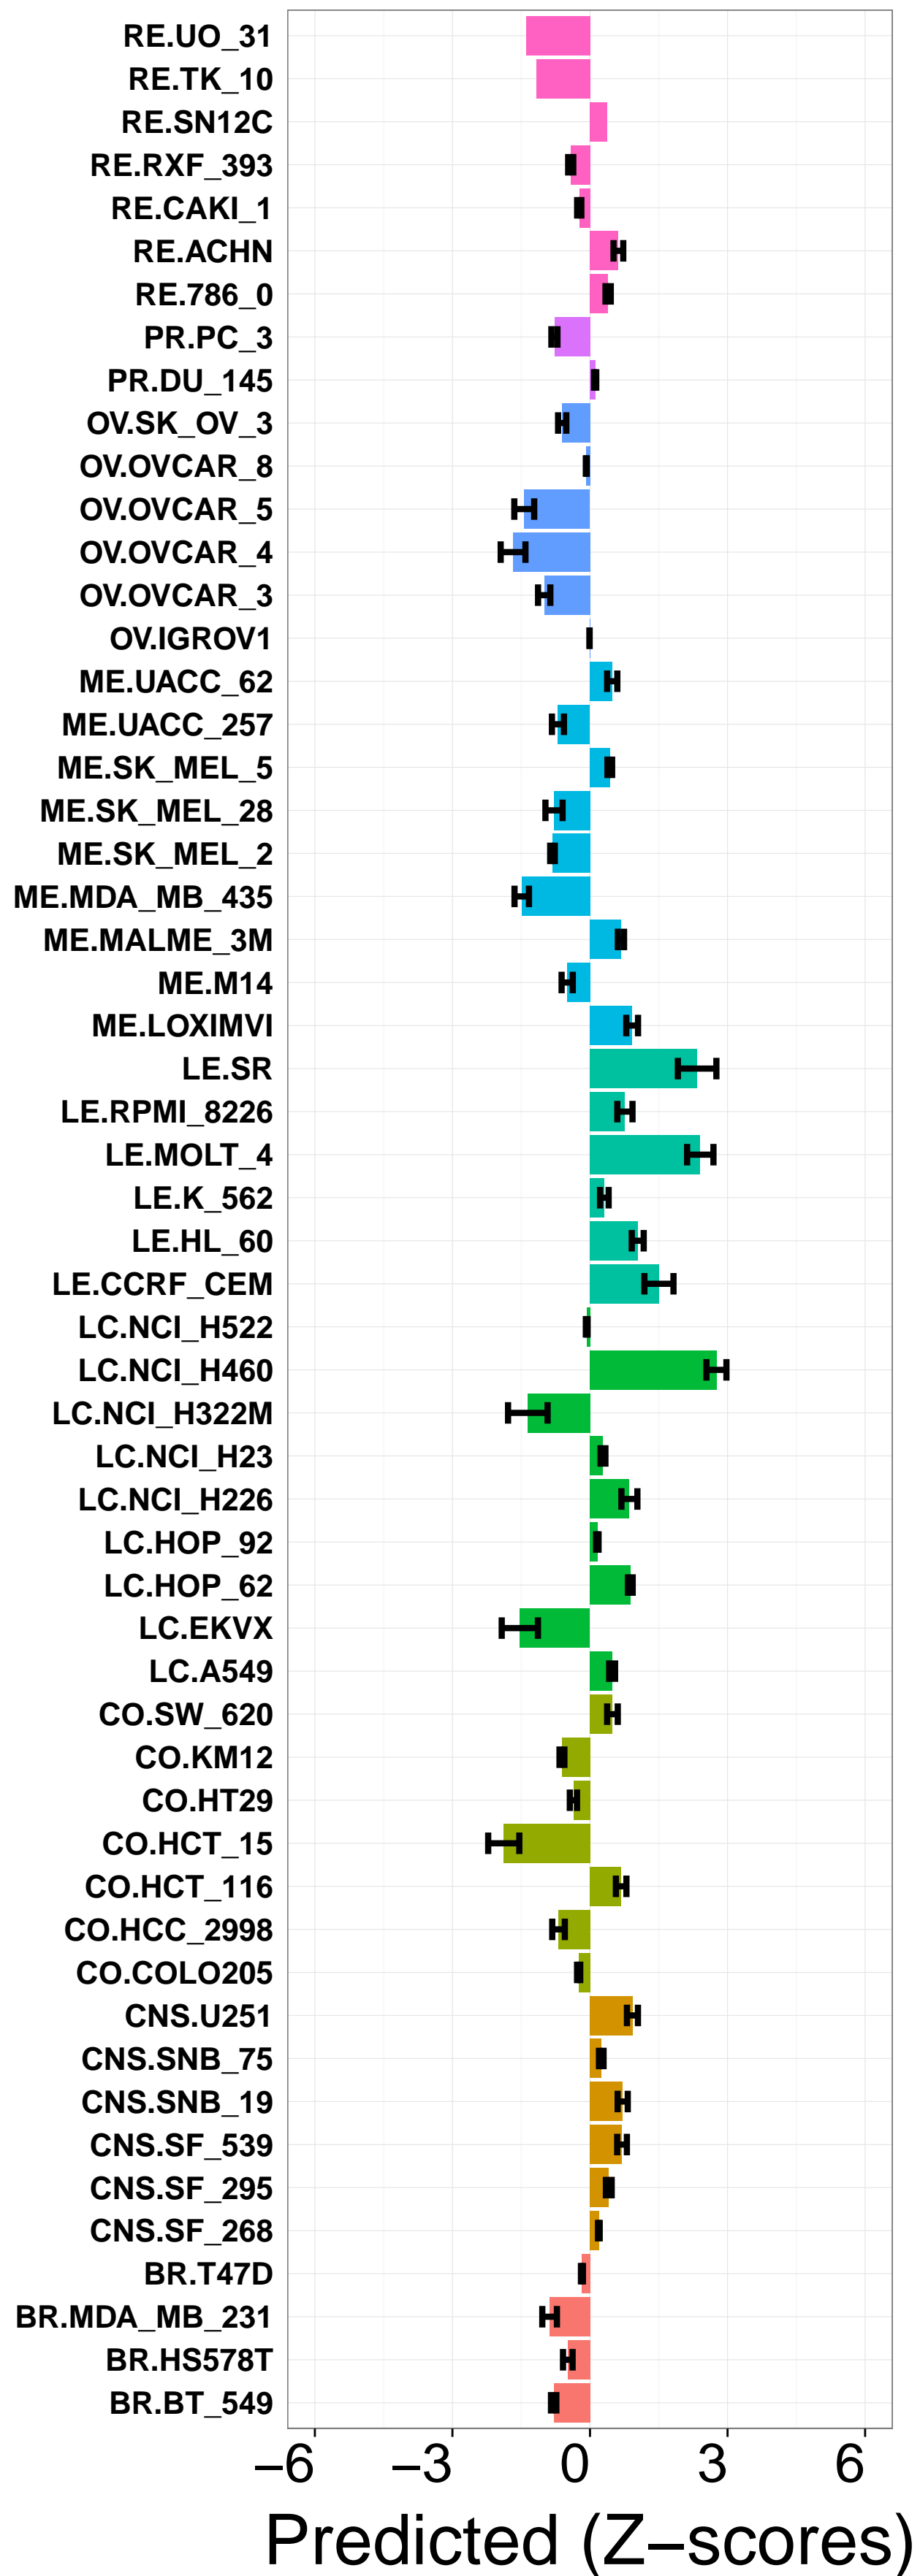

# NSC 26980, Mitomycin (Interpolation)

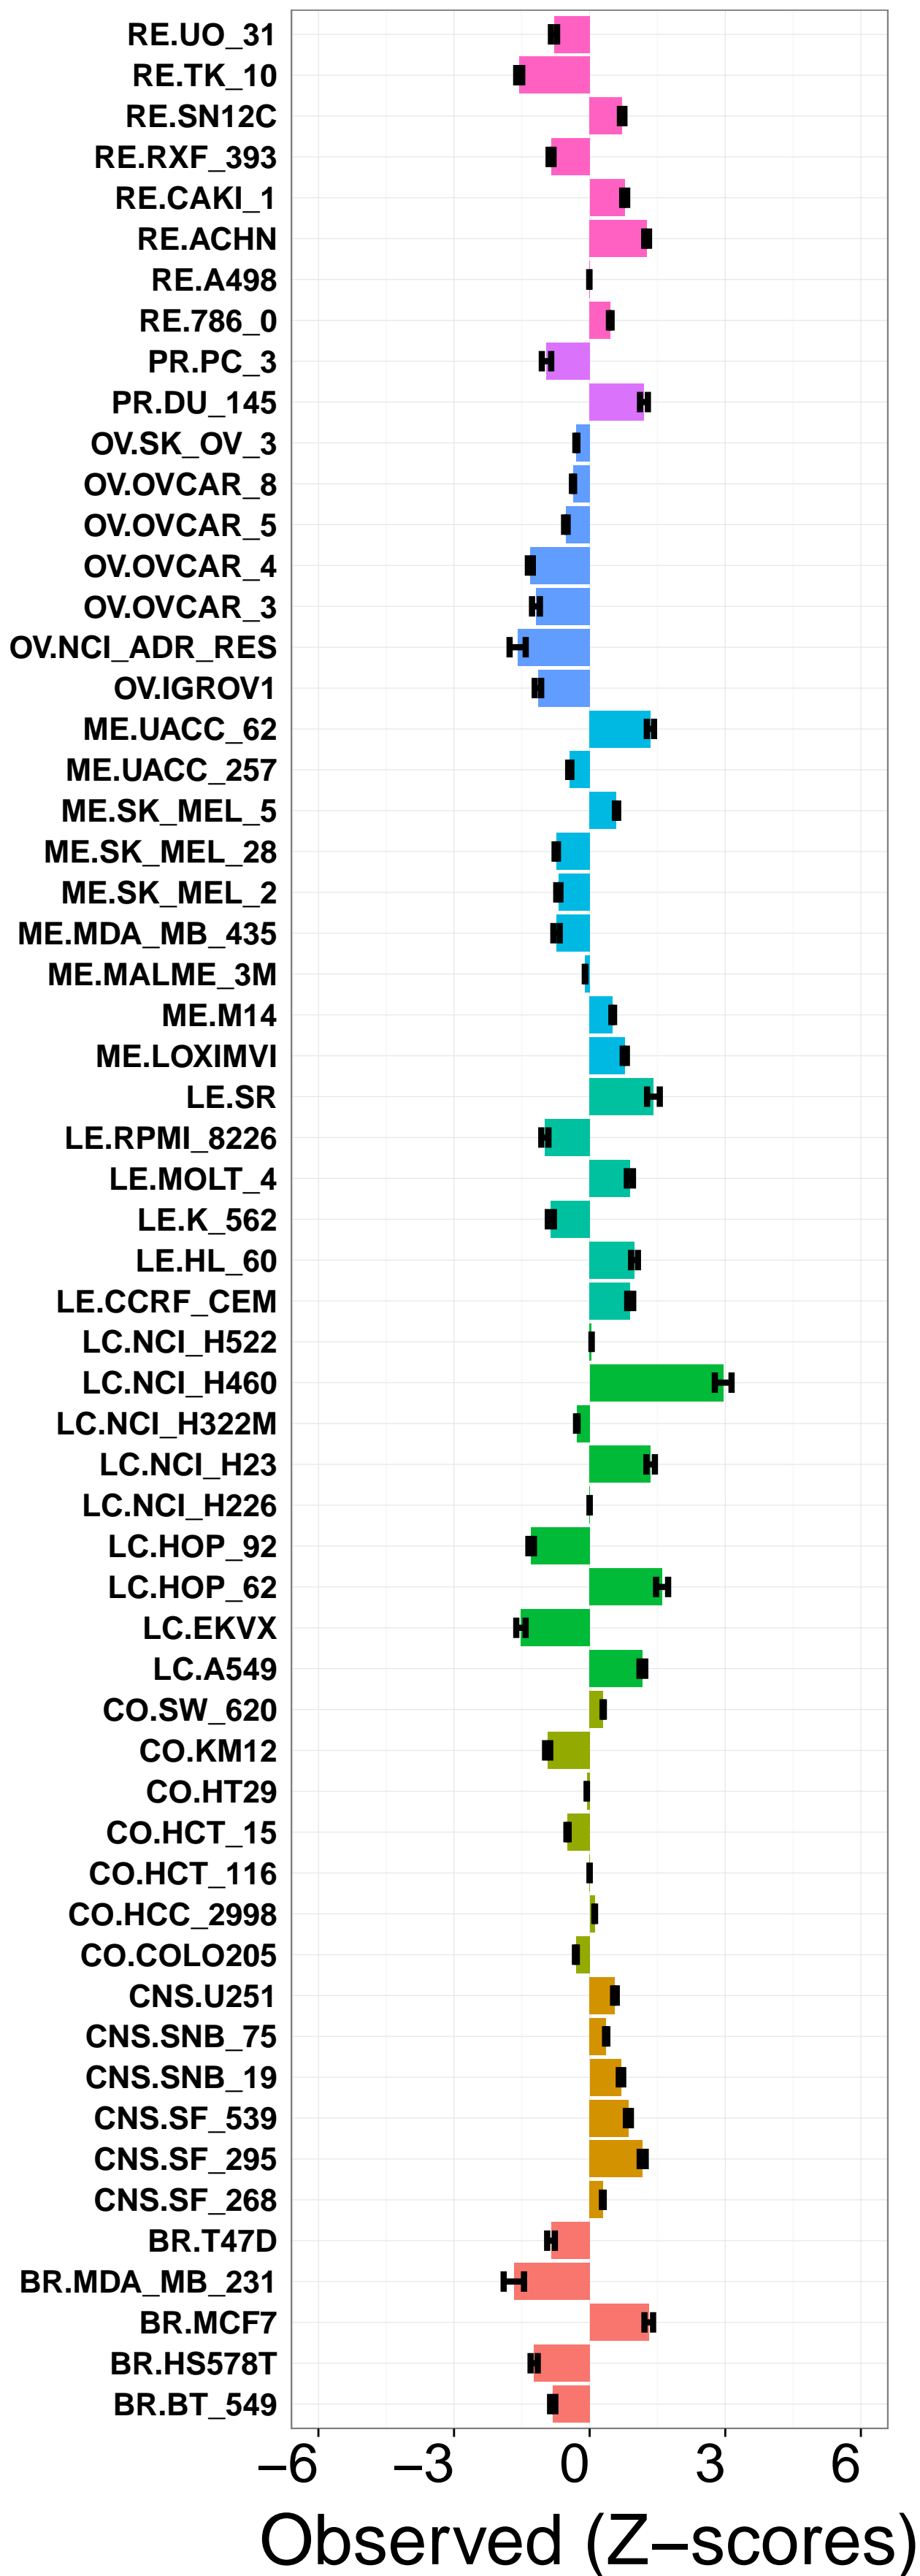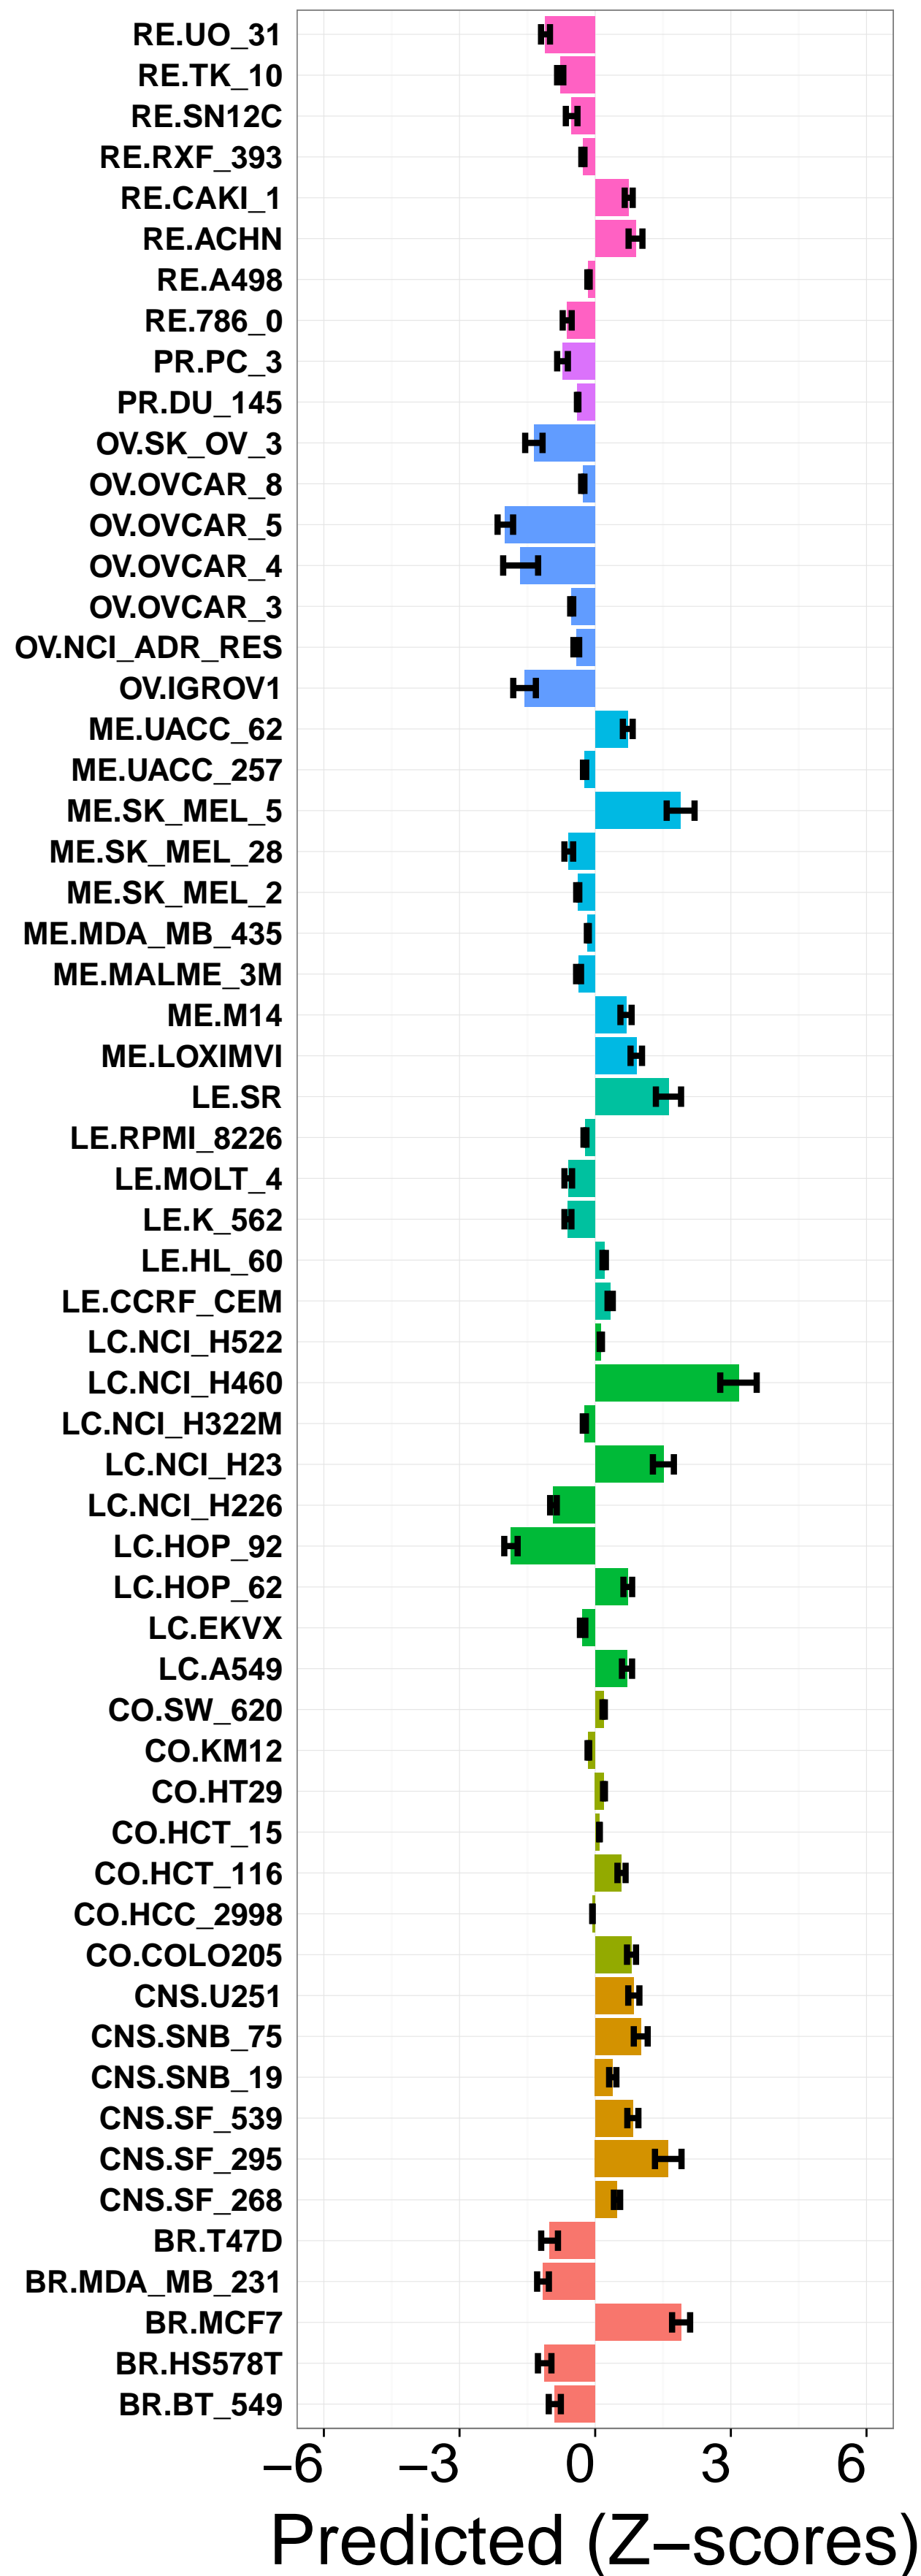

# NSC 27640, Floxuridine (Interpolation)

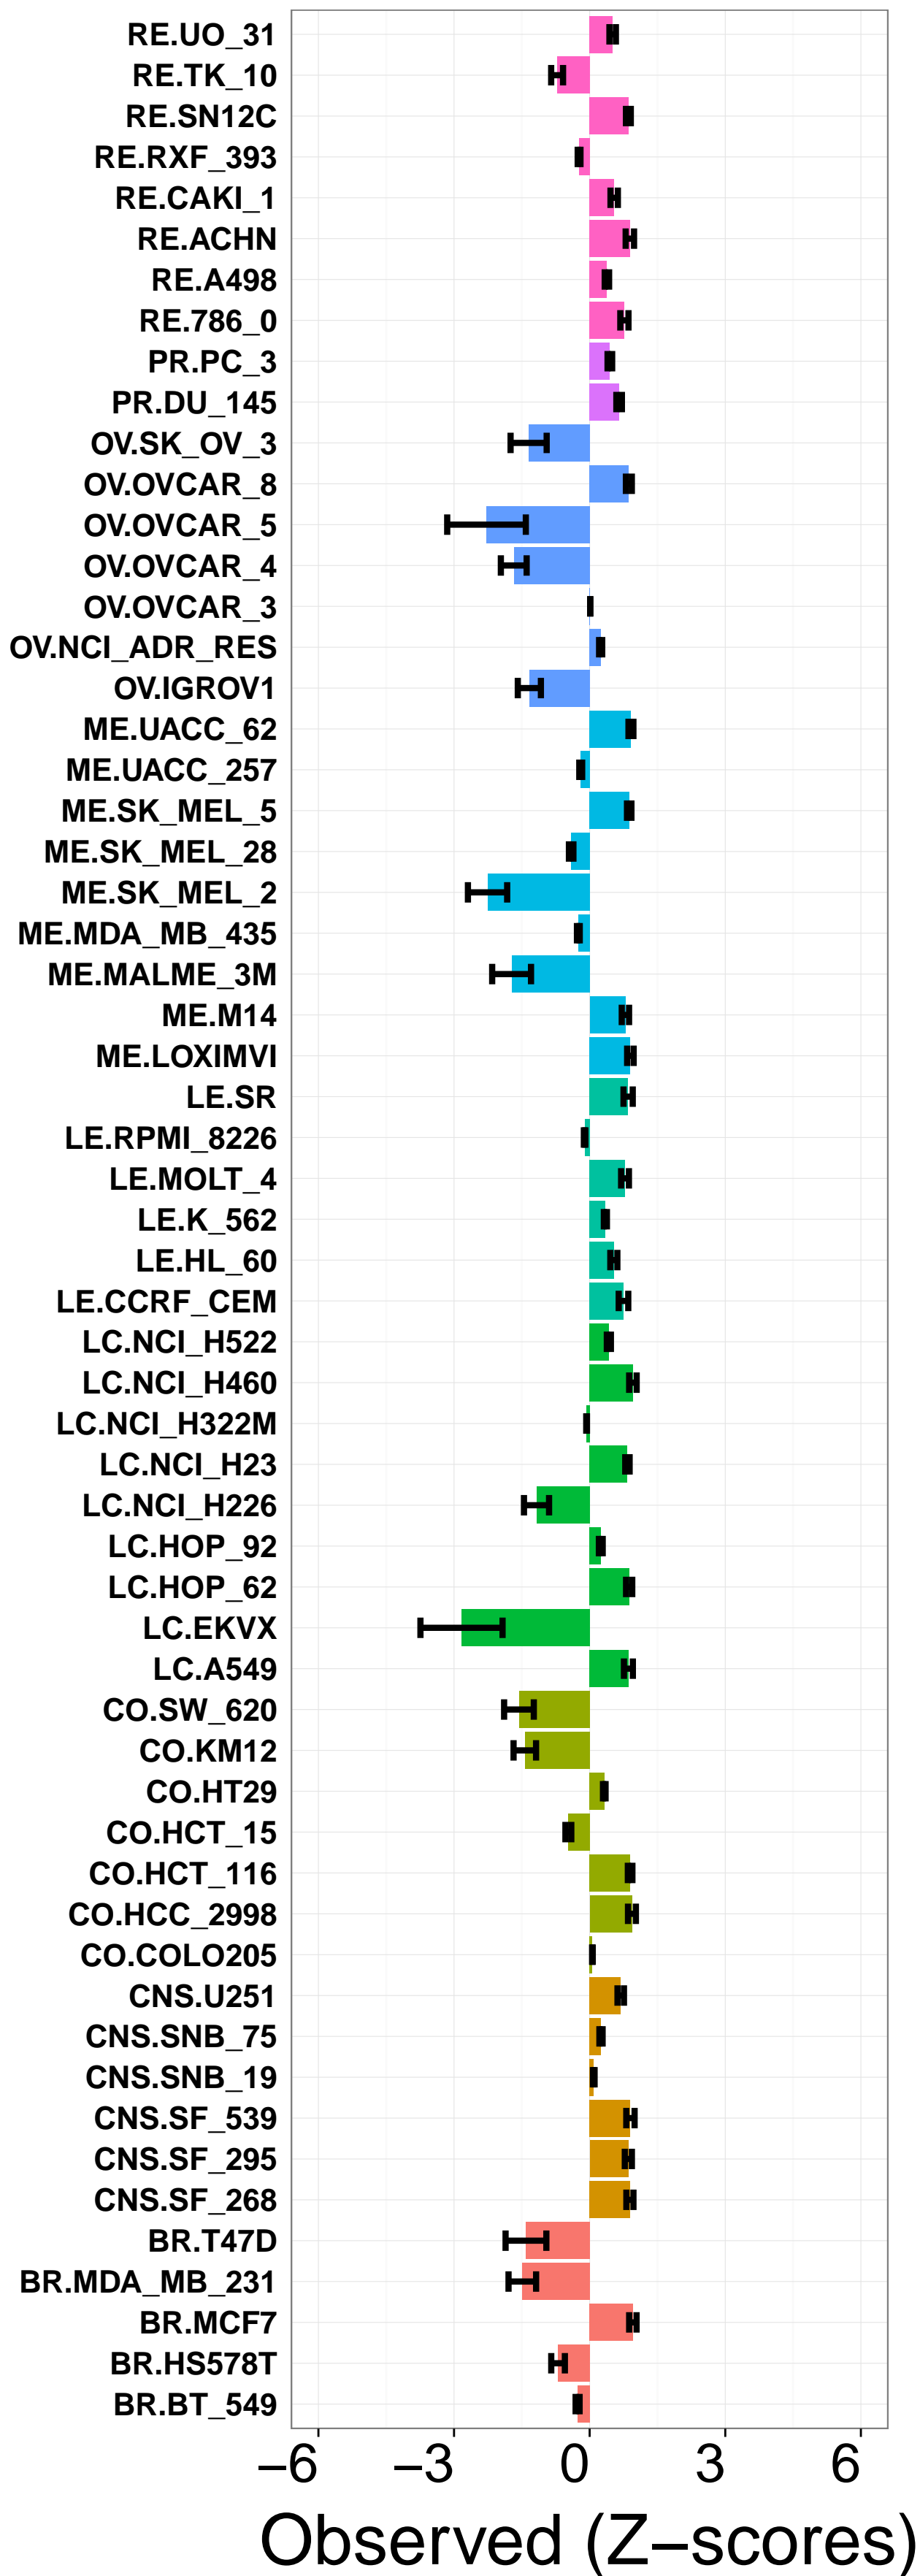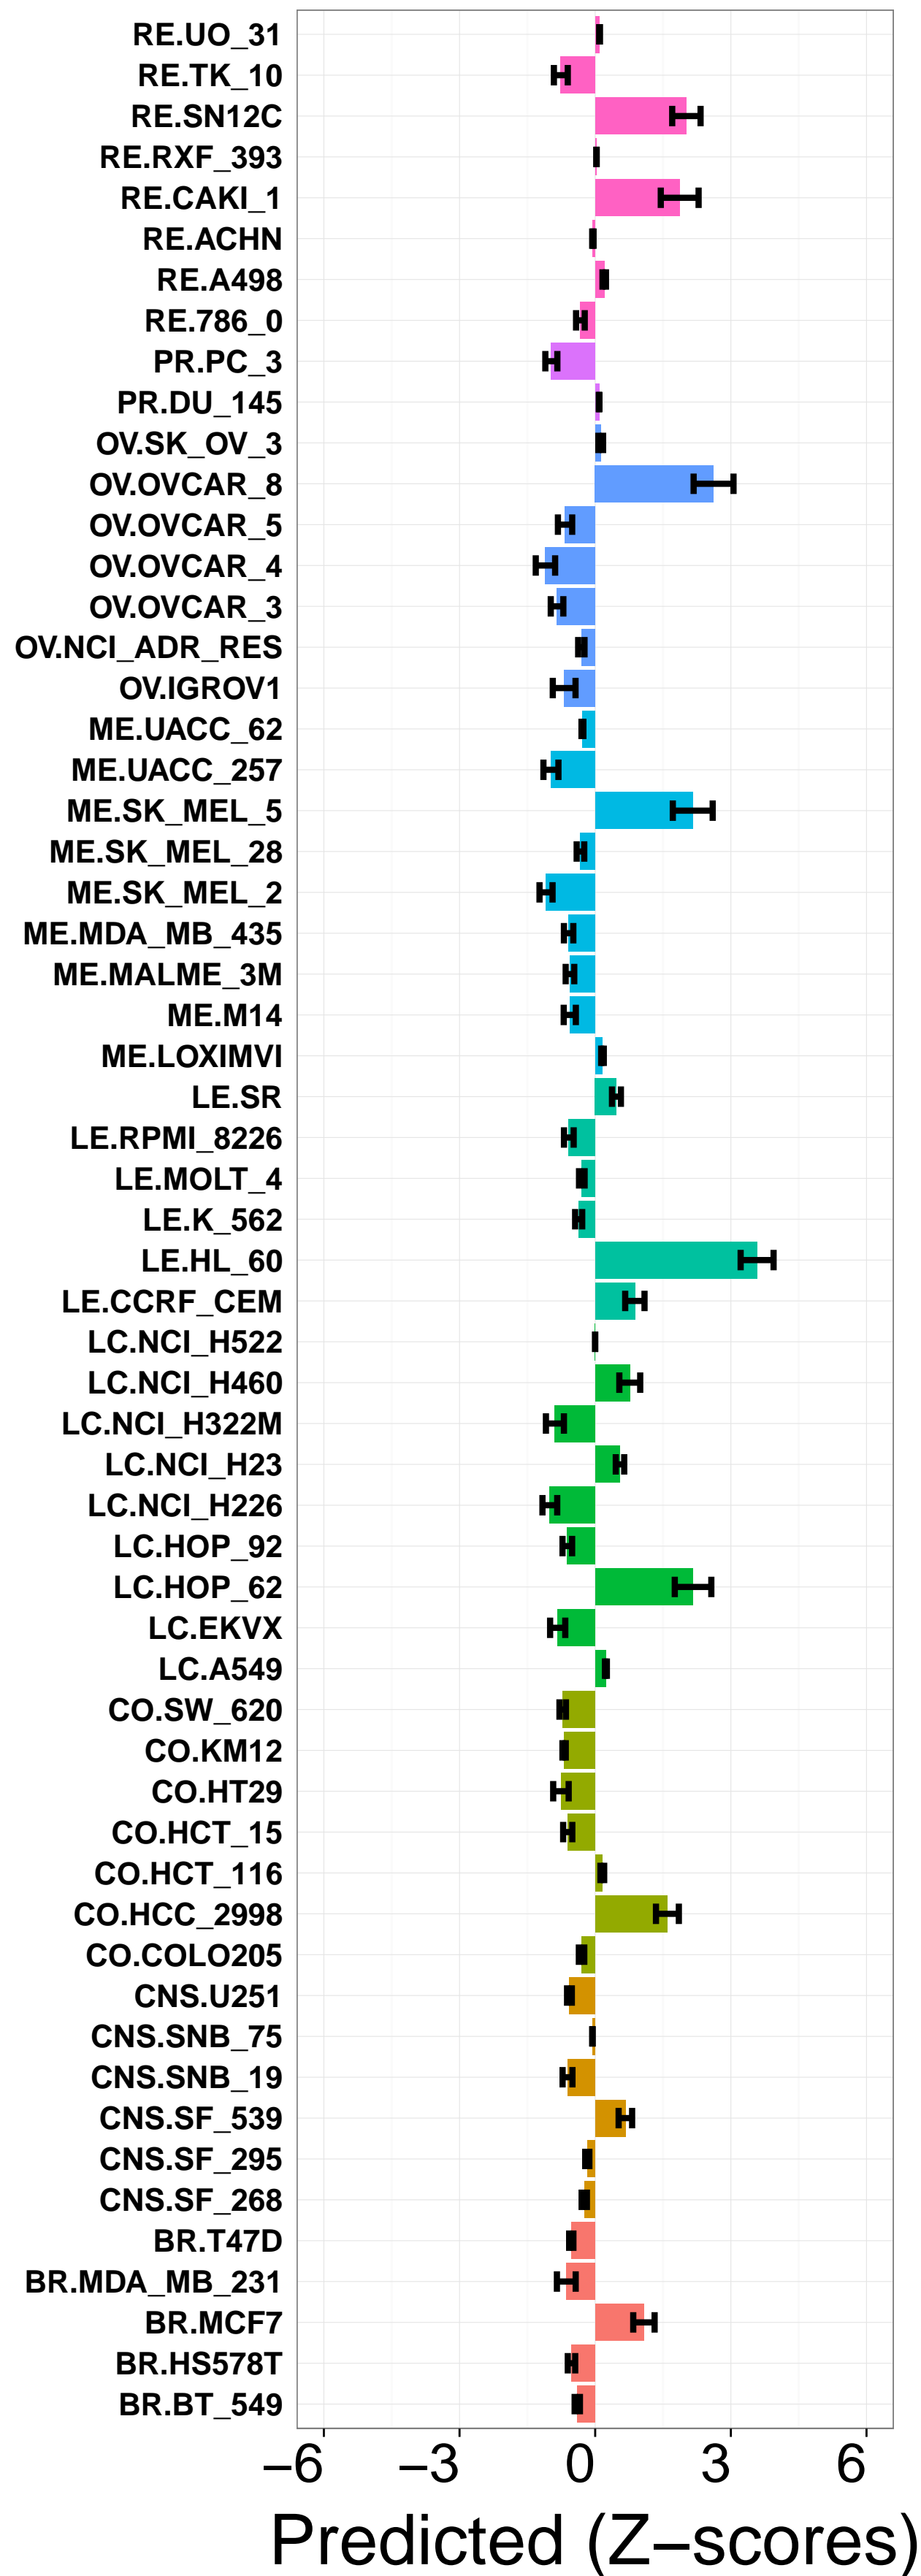

# NSC 279836, (Interpolation)

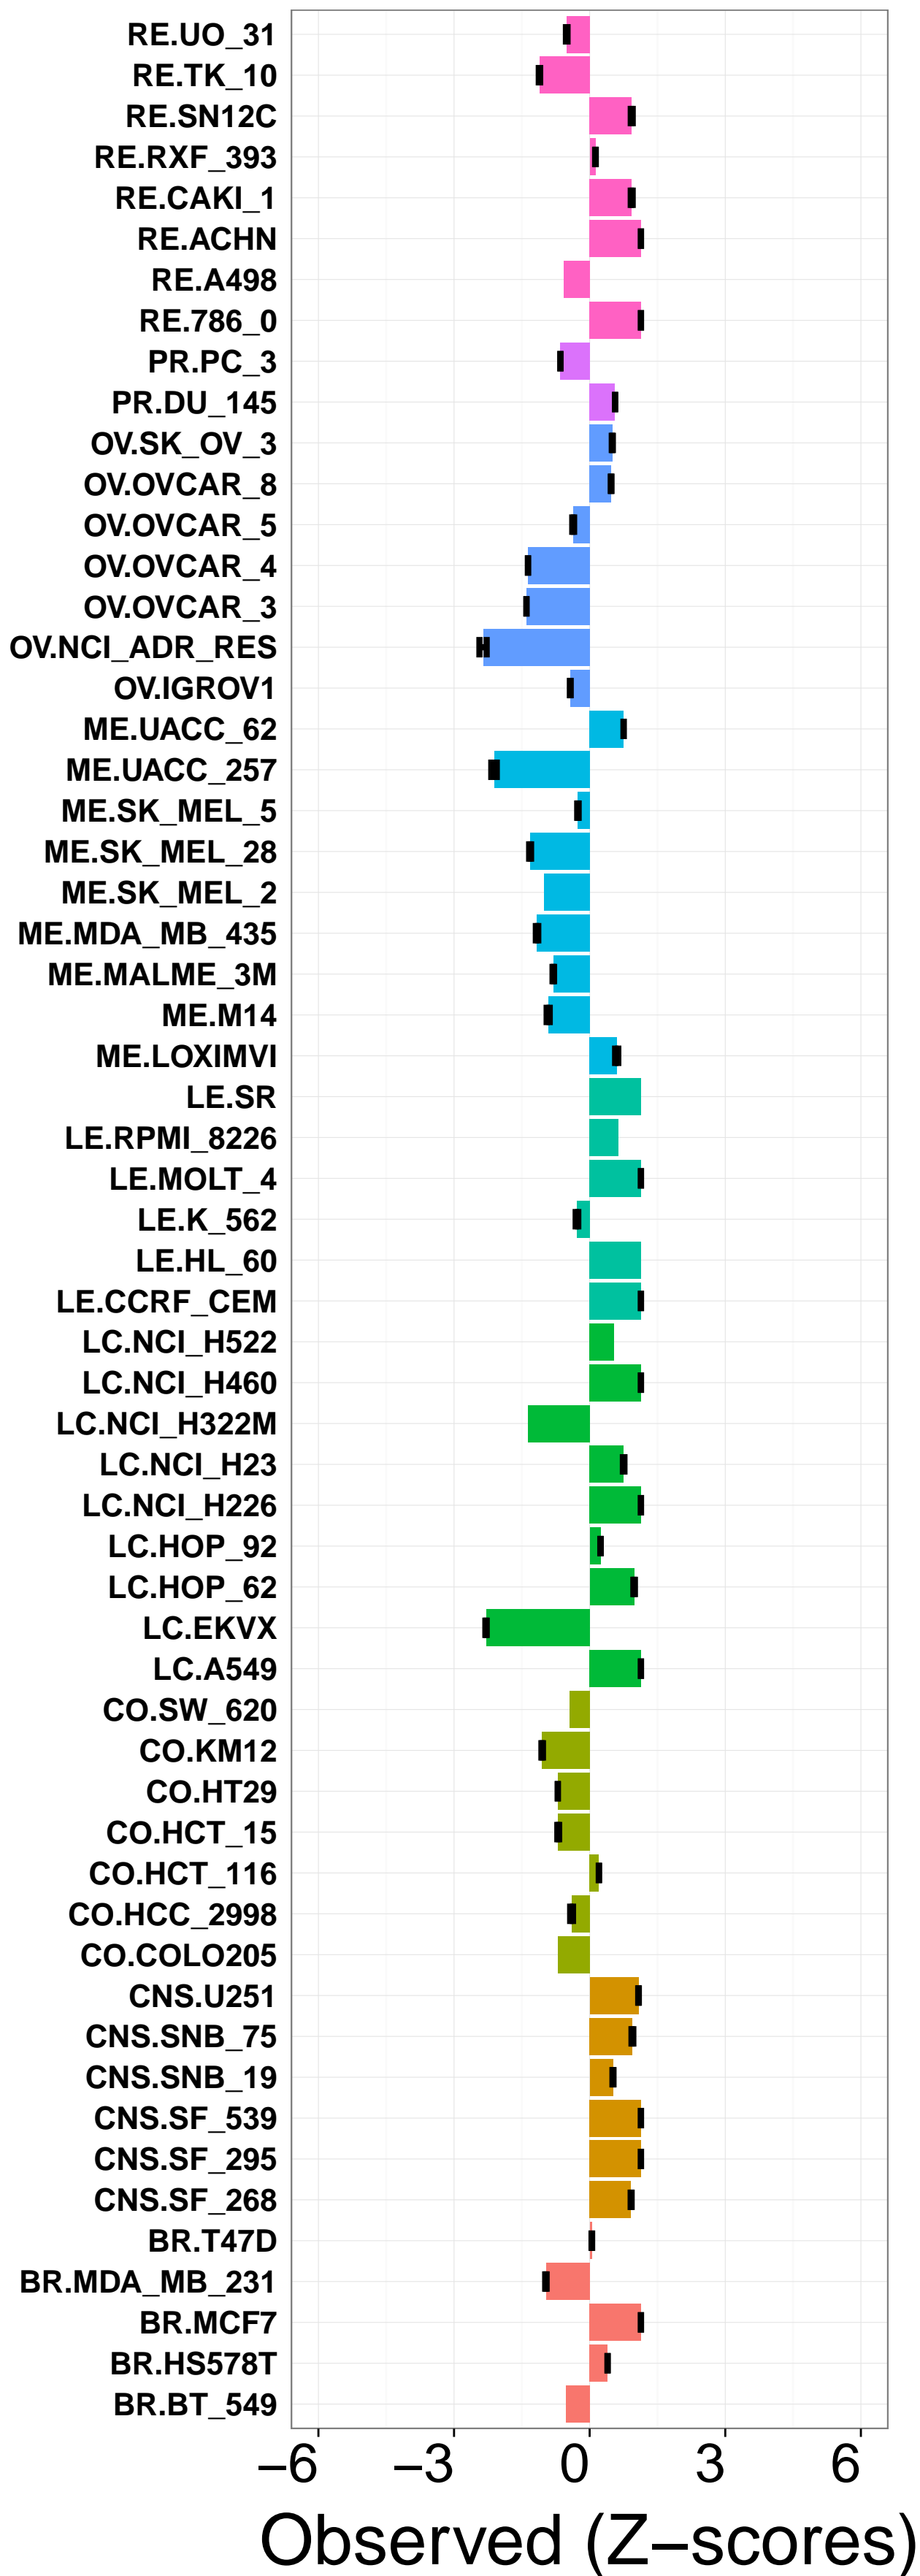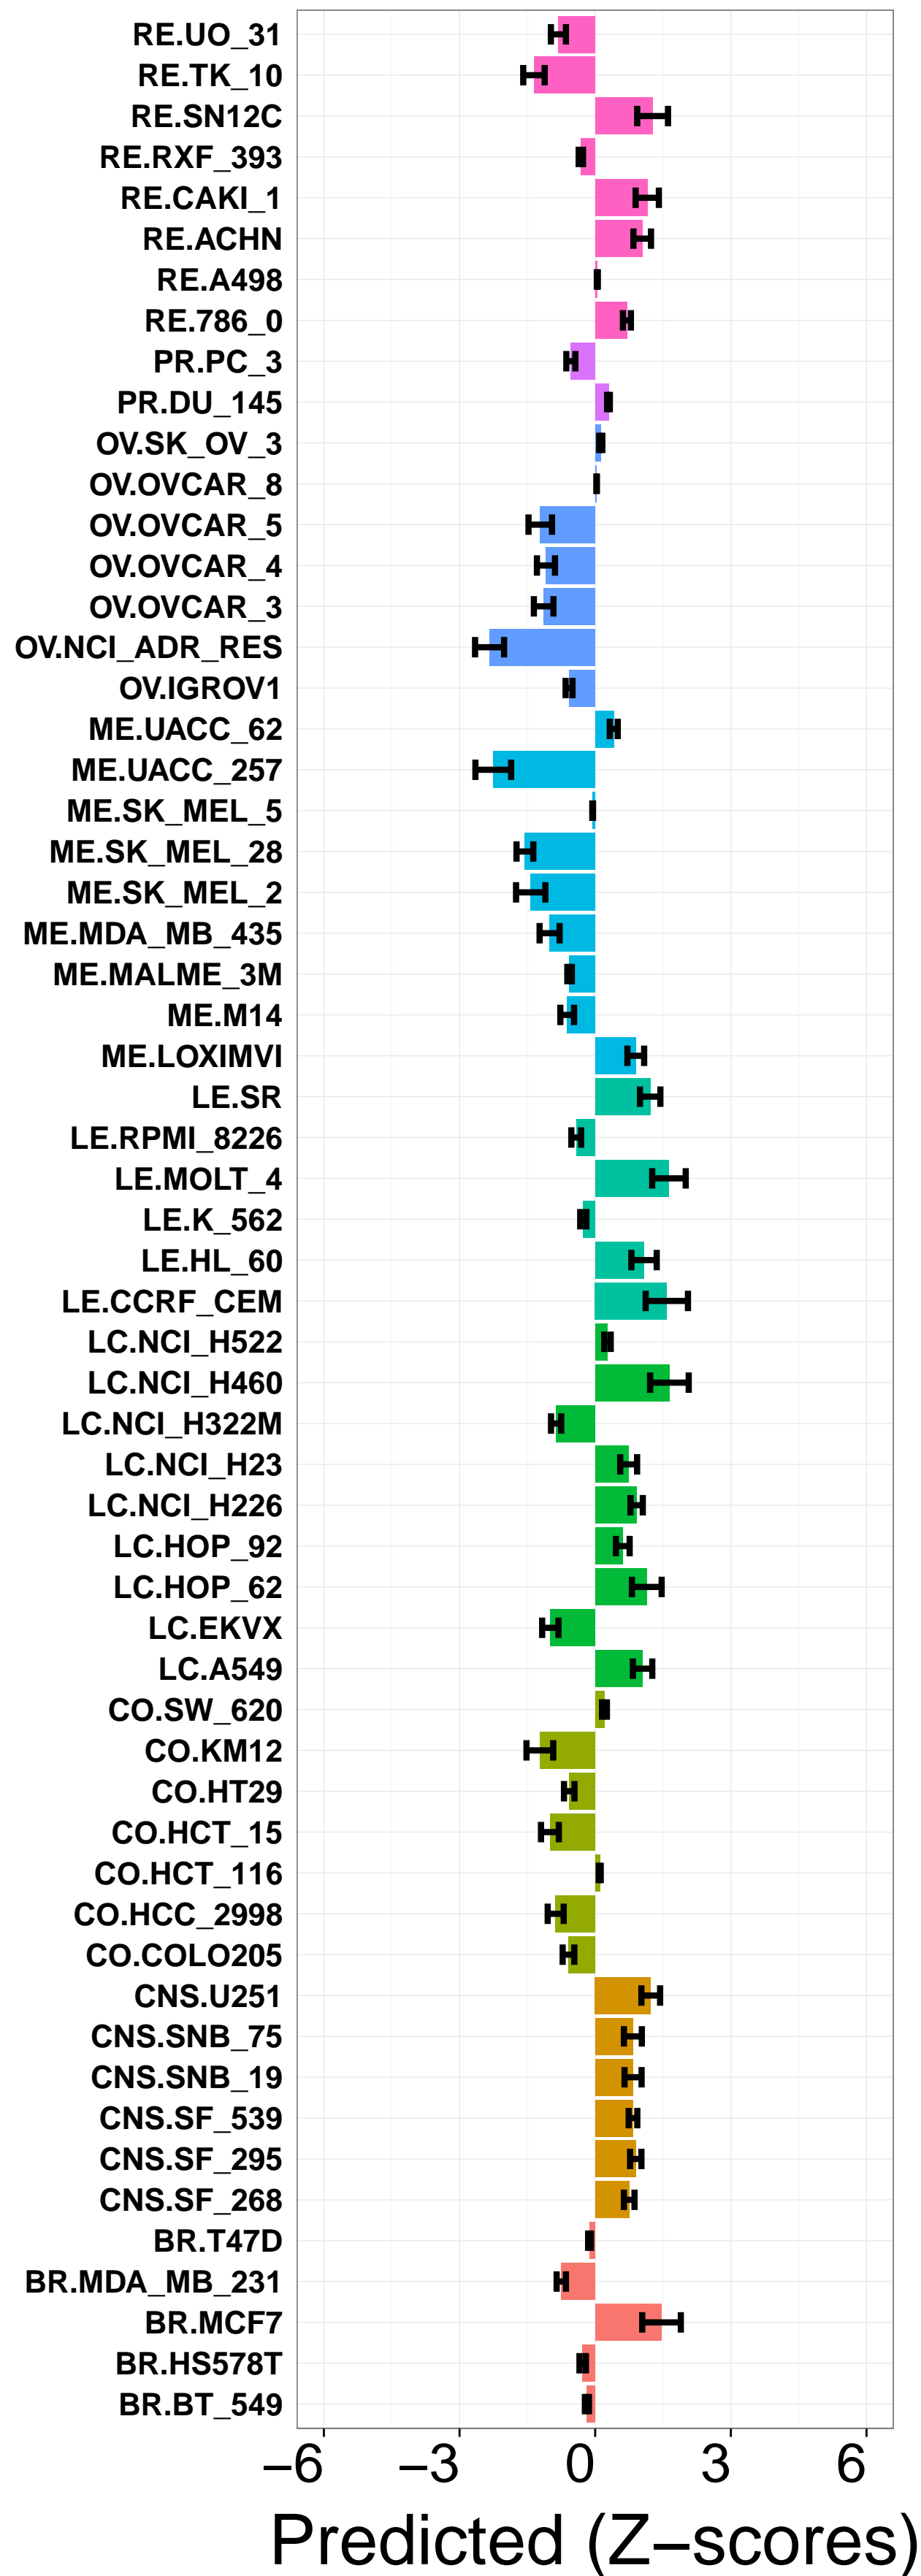

# NSC 280594, (Interpolation)

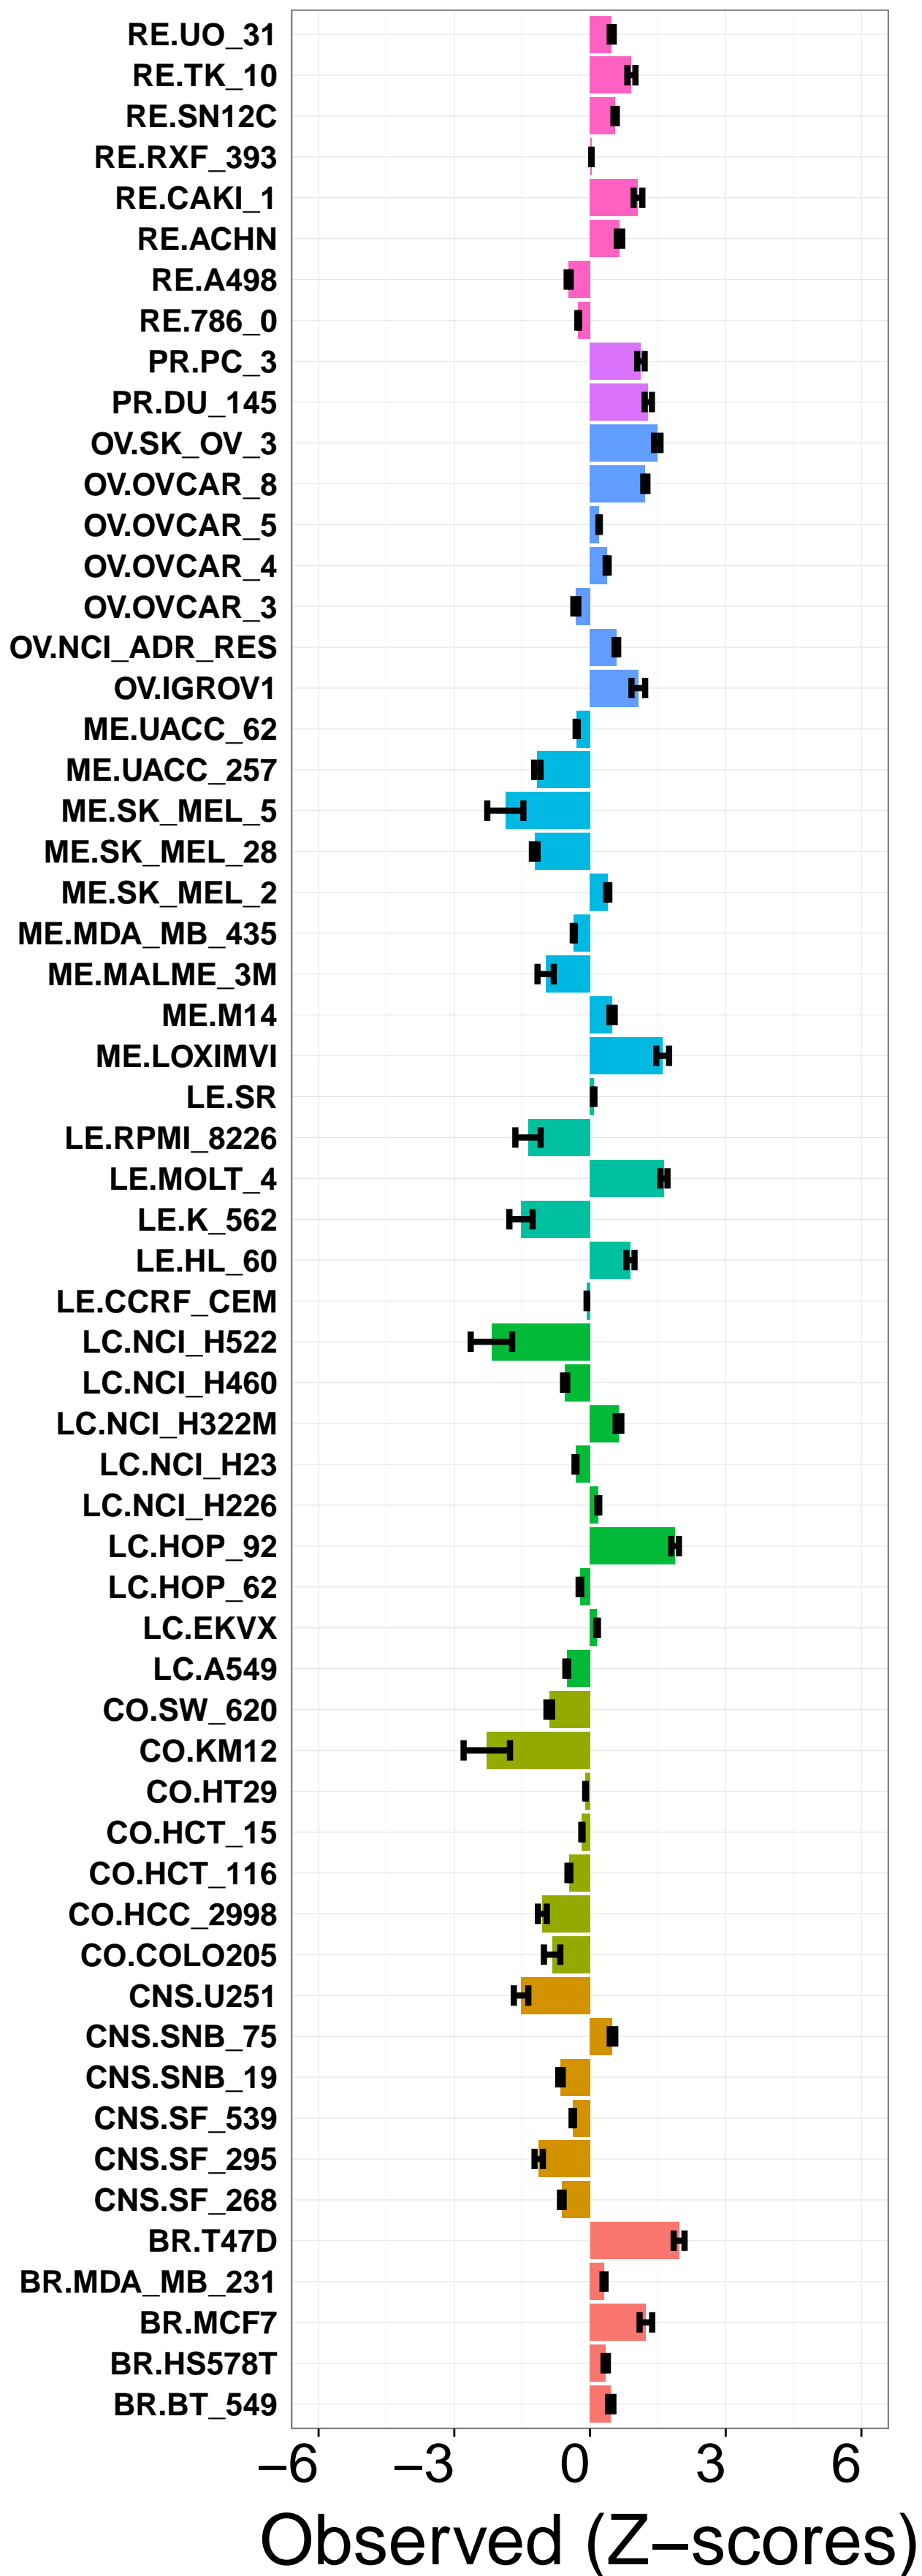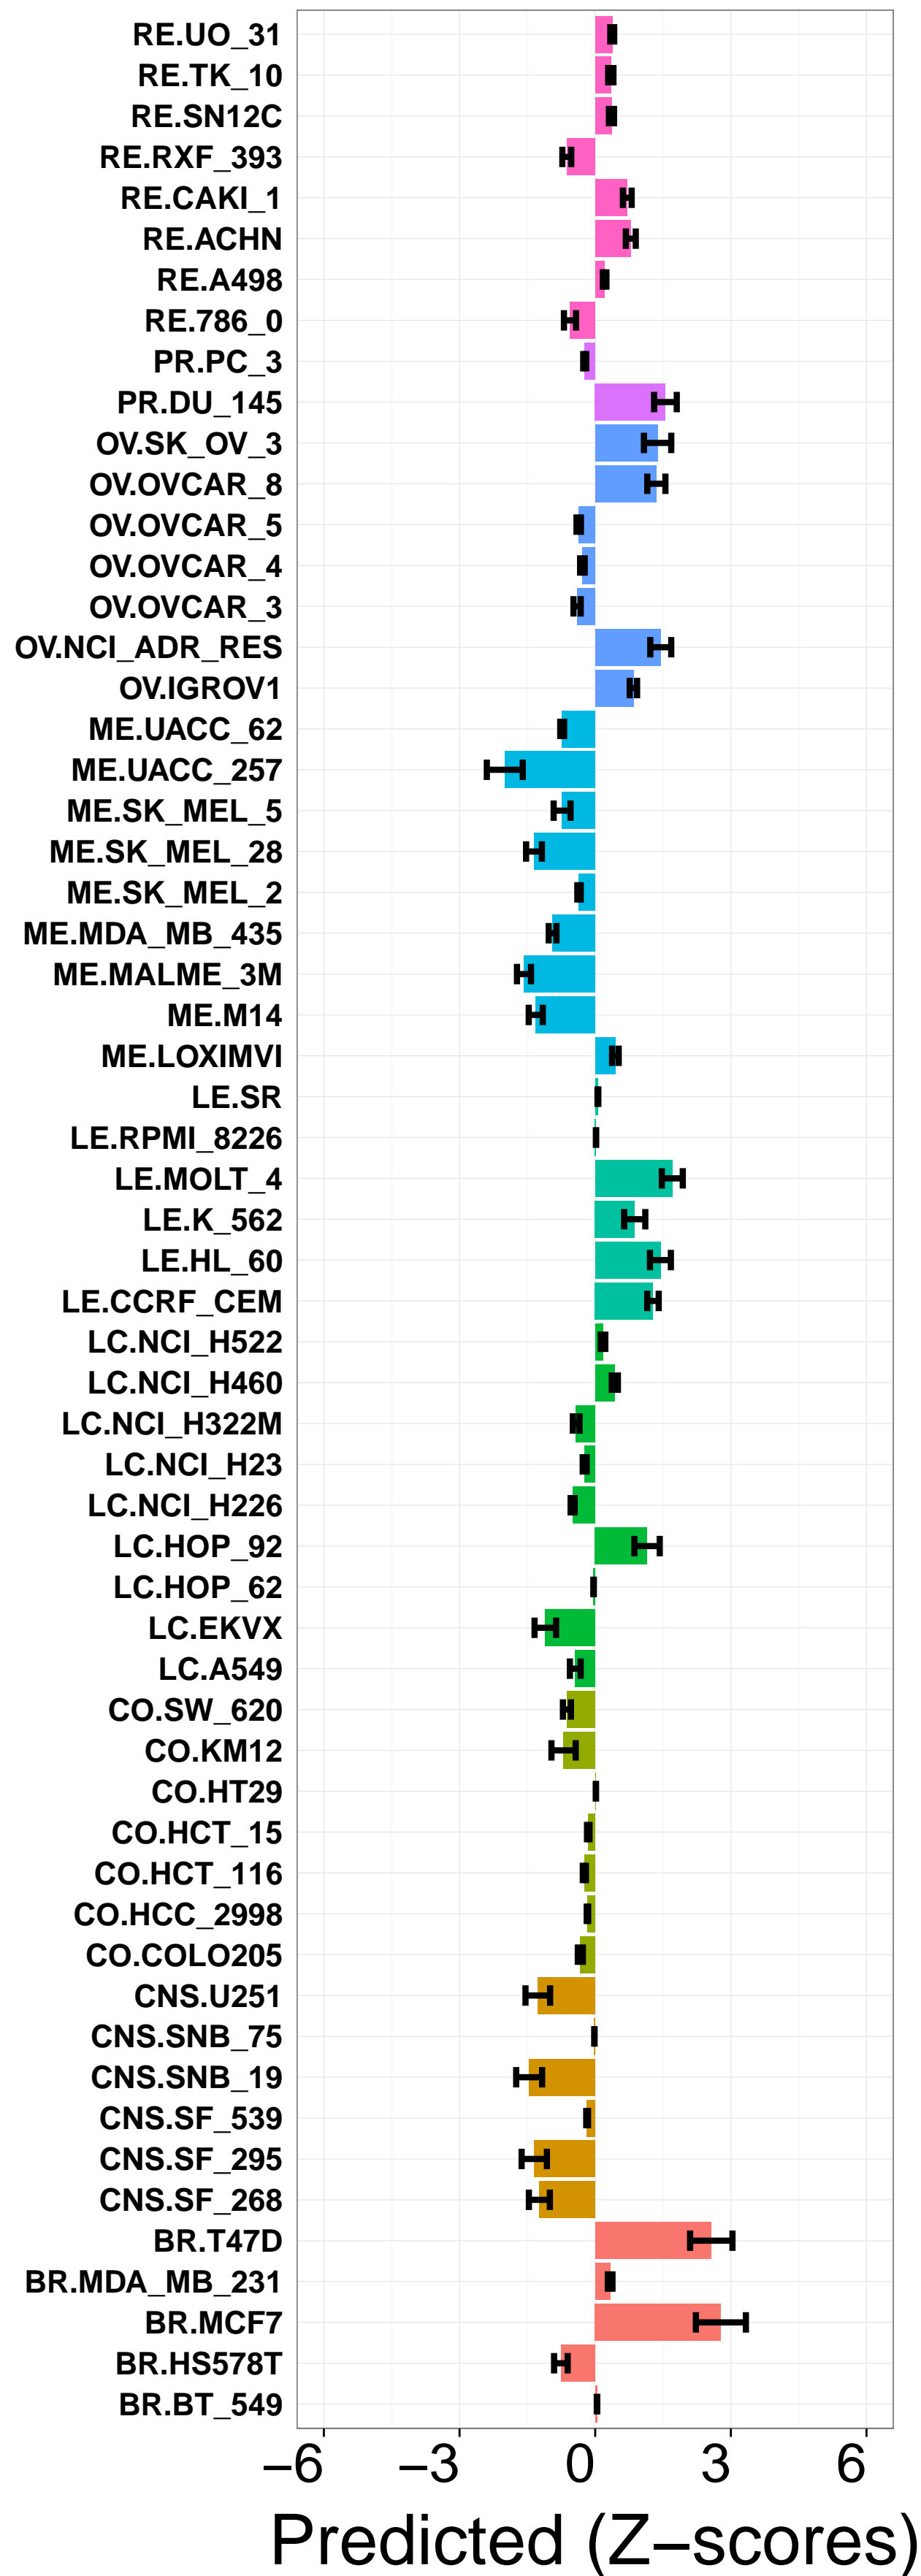



# NSC 281612, (Interpolation)

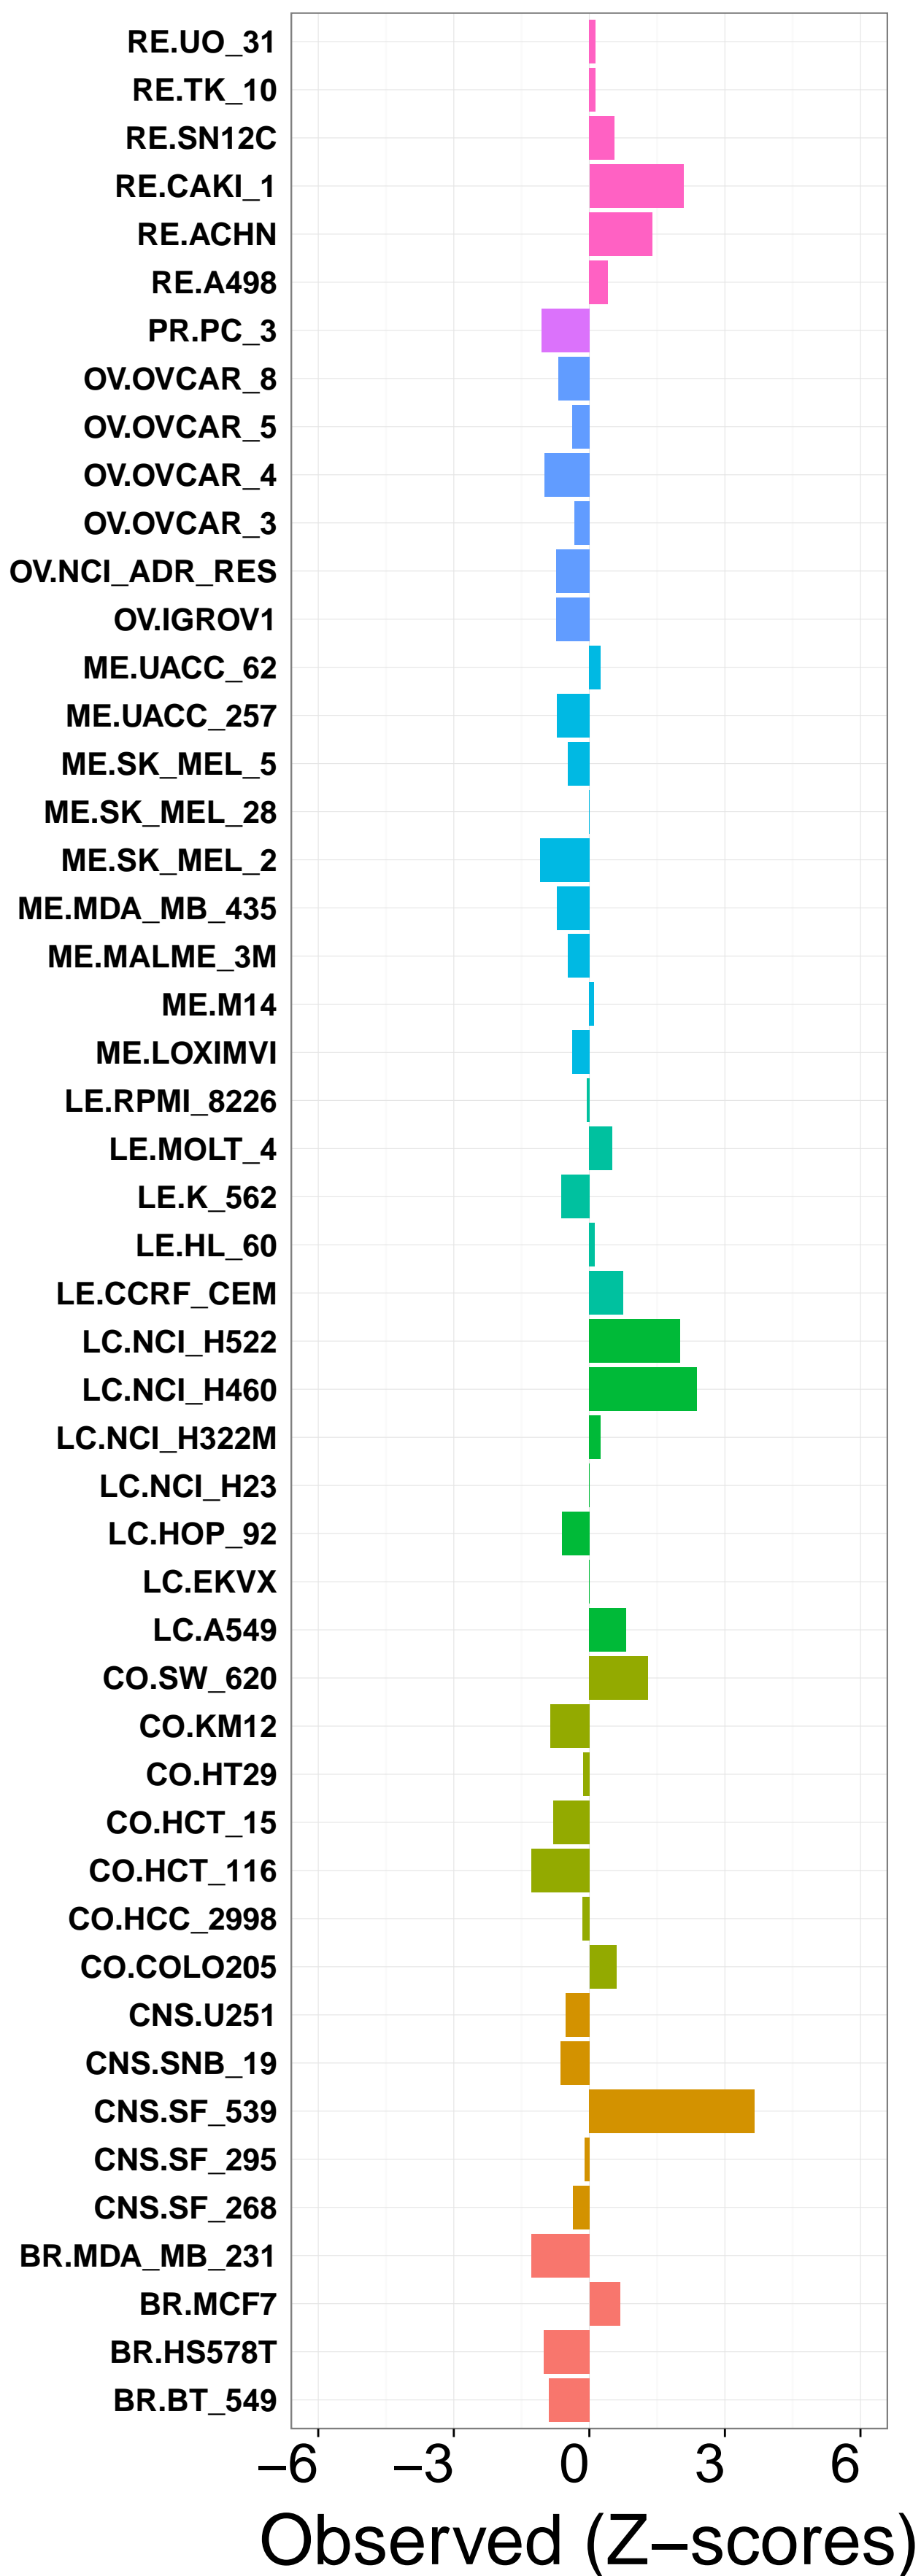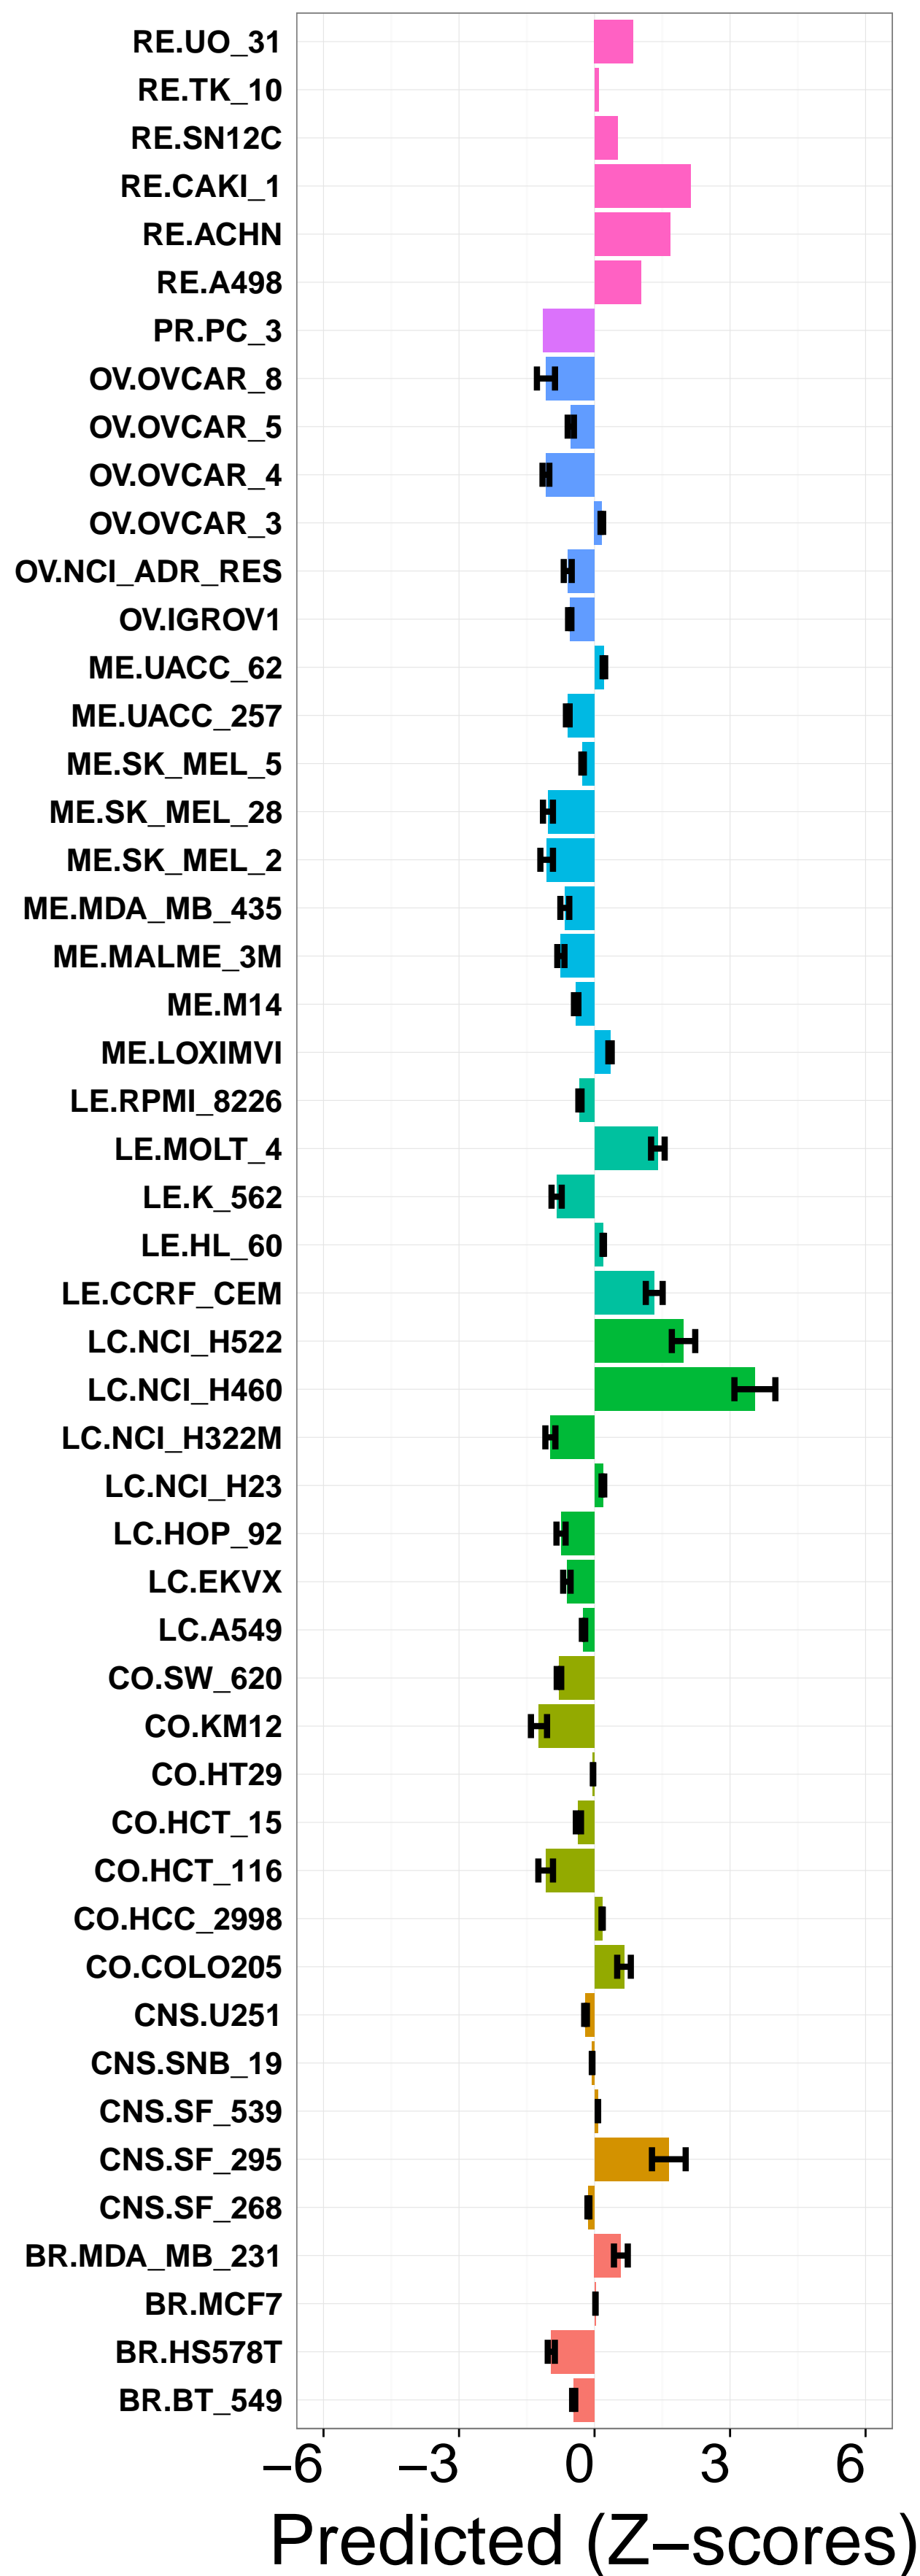

# NSC 287459, (Interpolation)

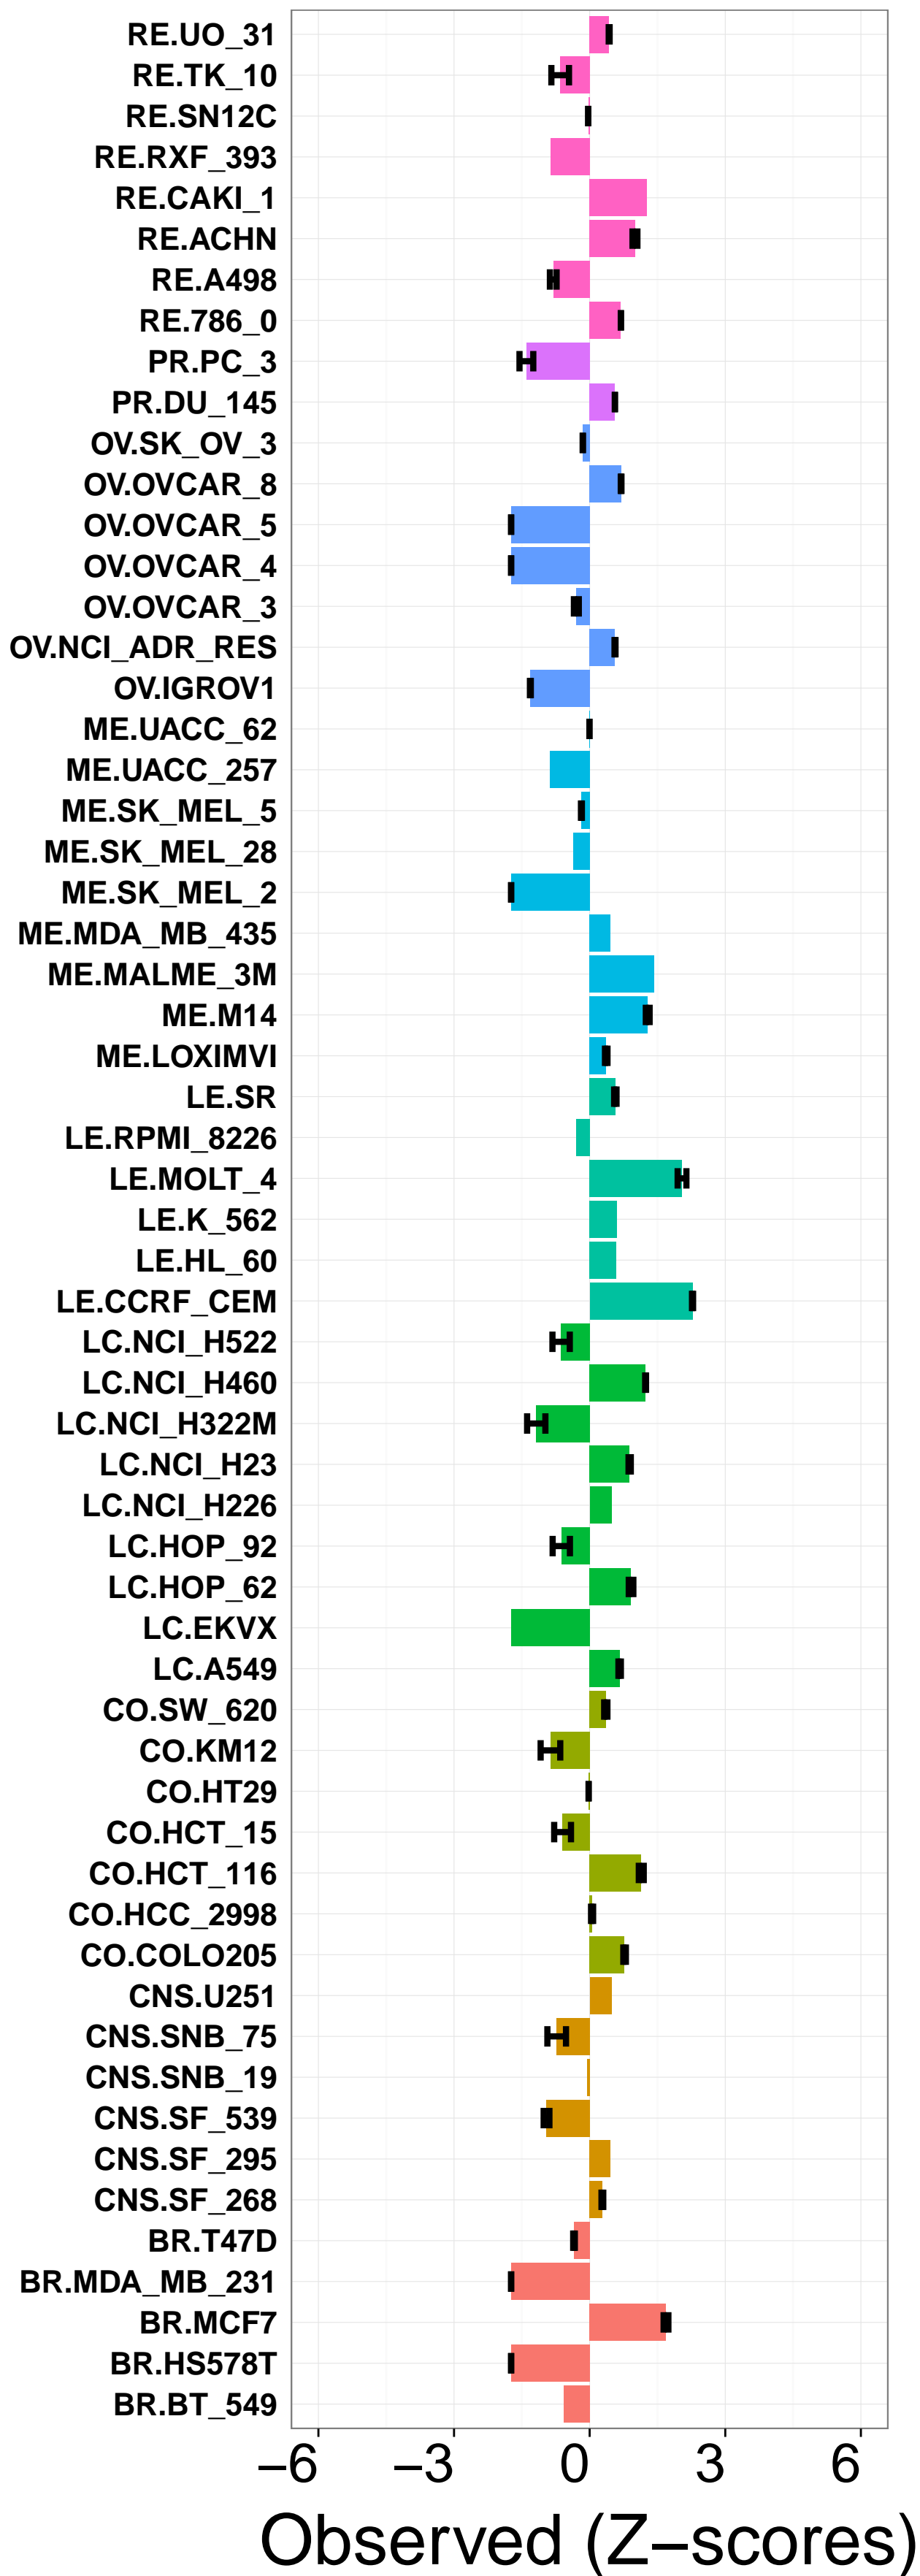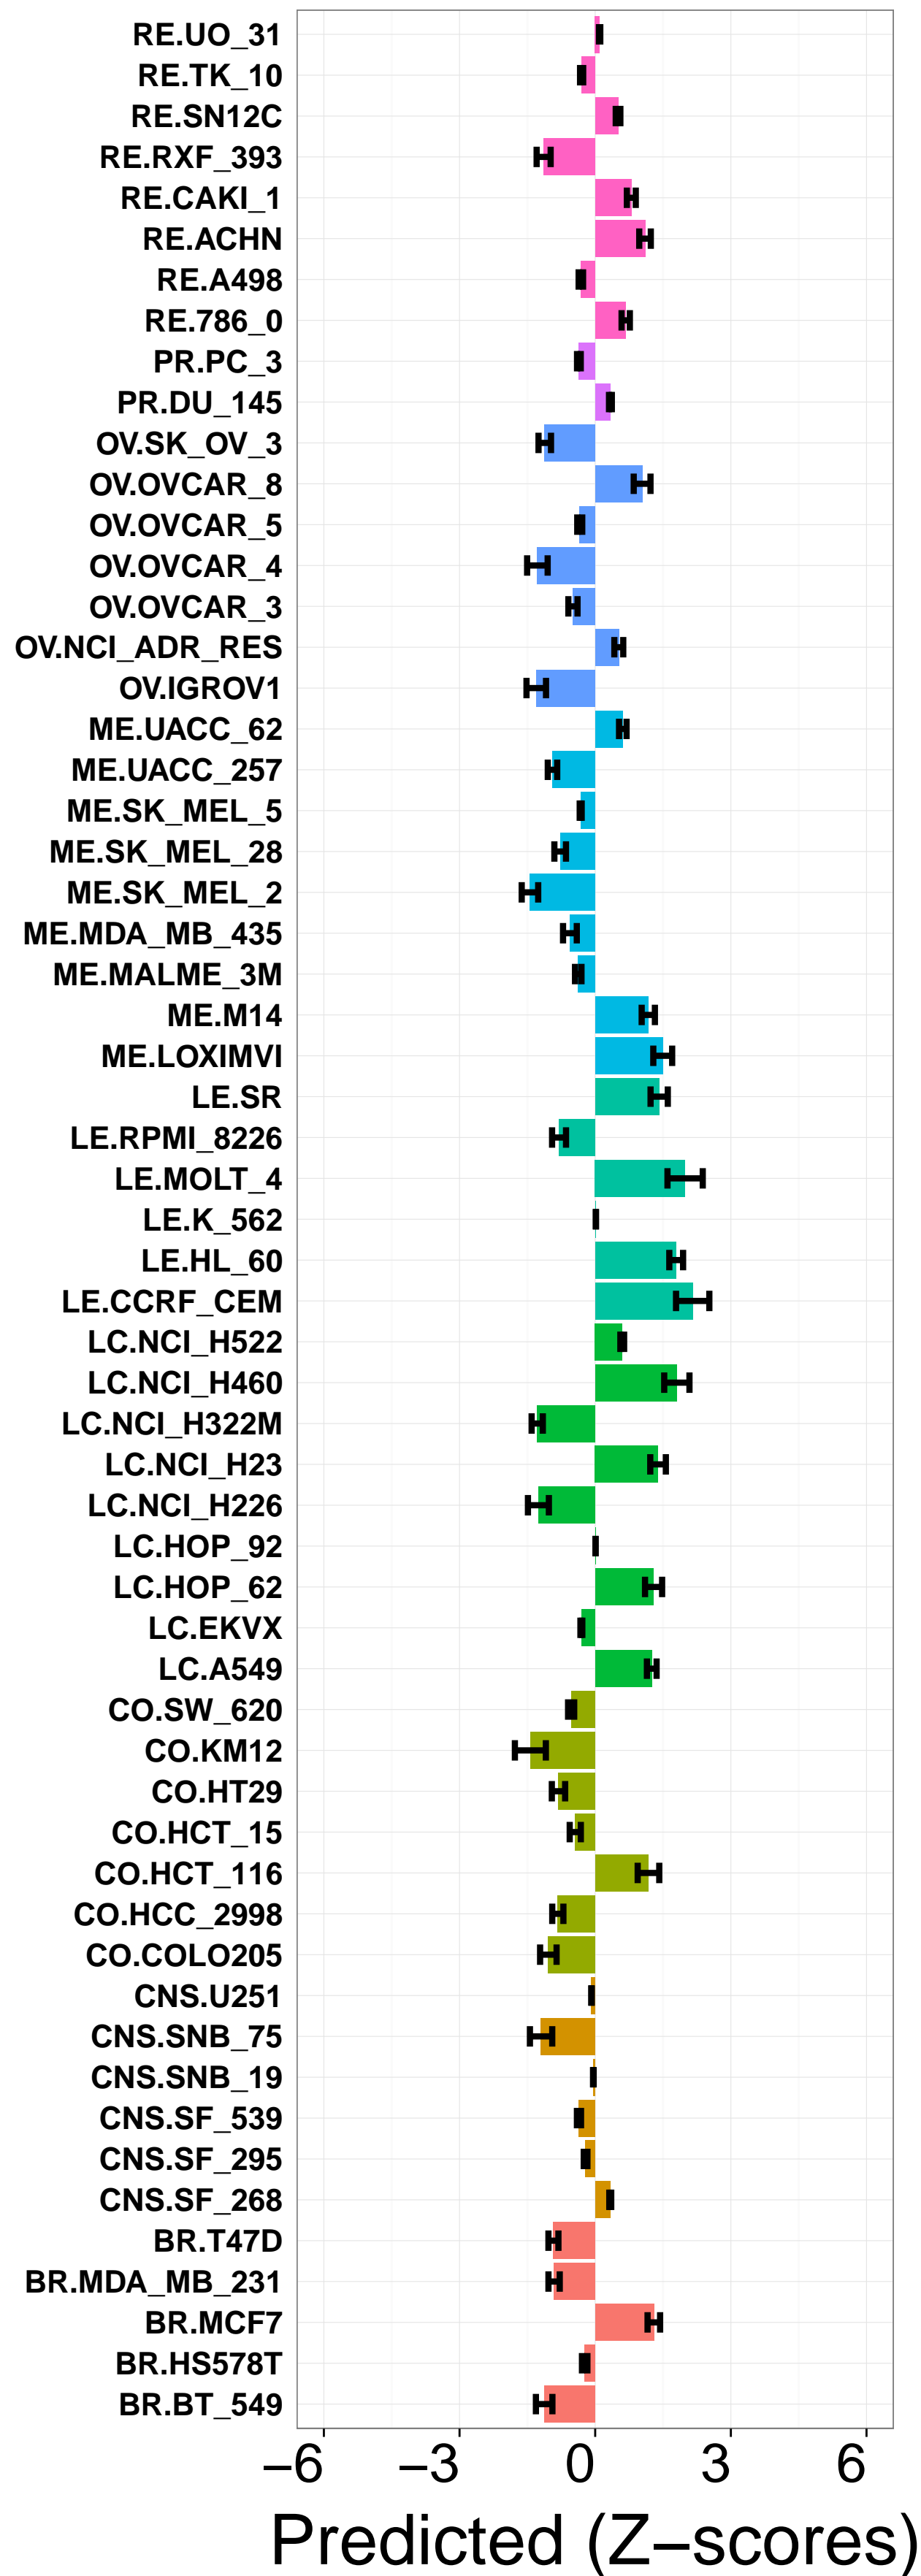

# NSC 301739, (Interpolation)

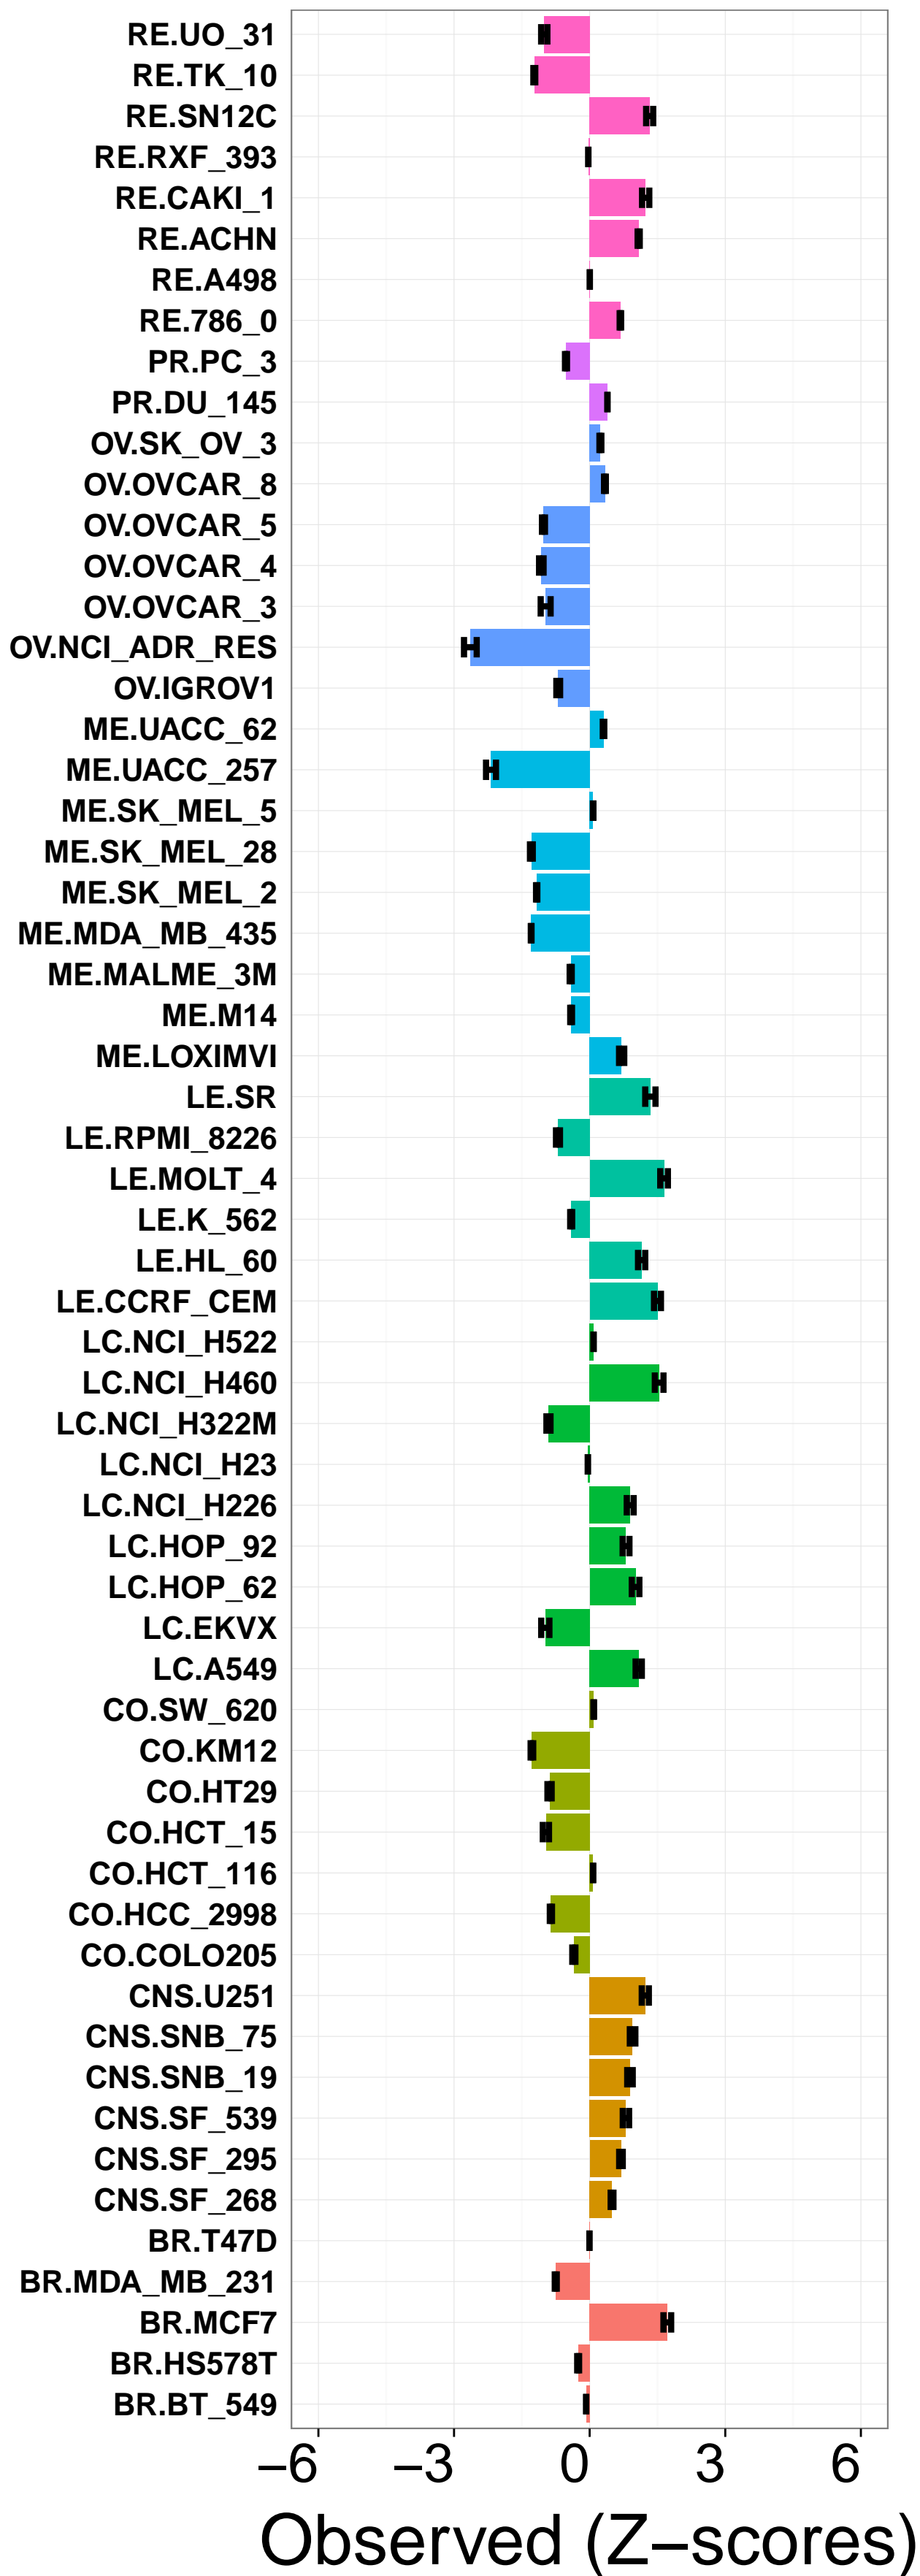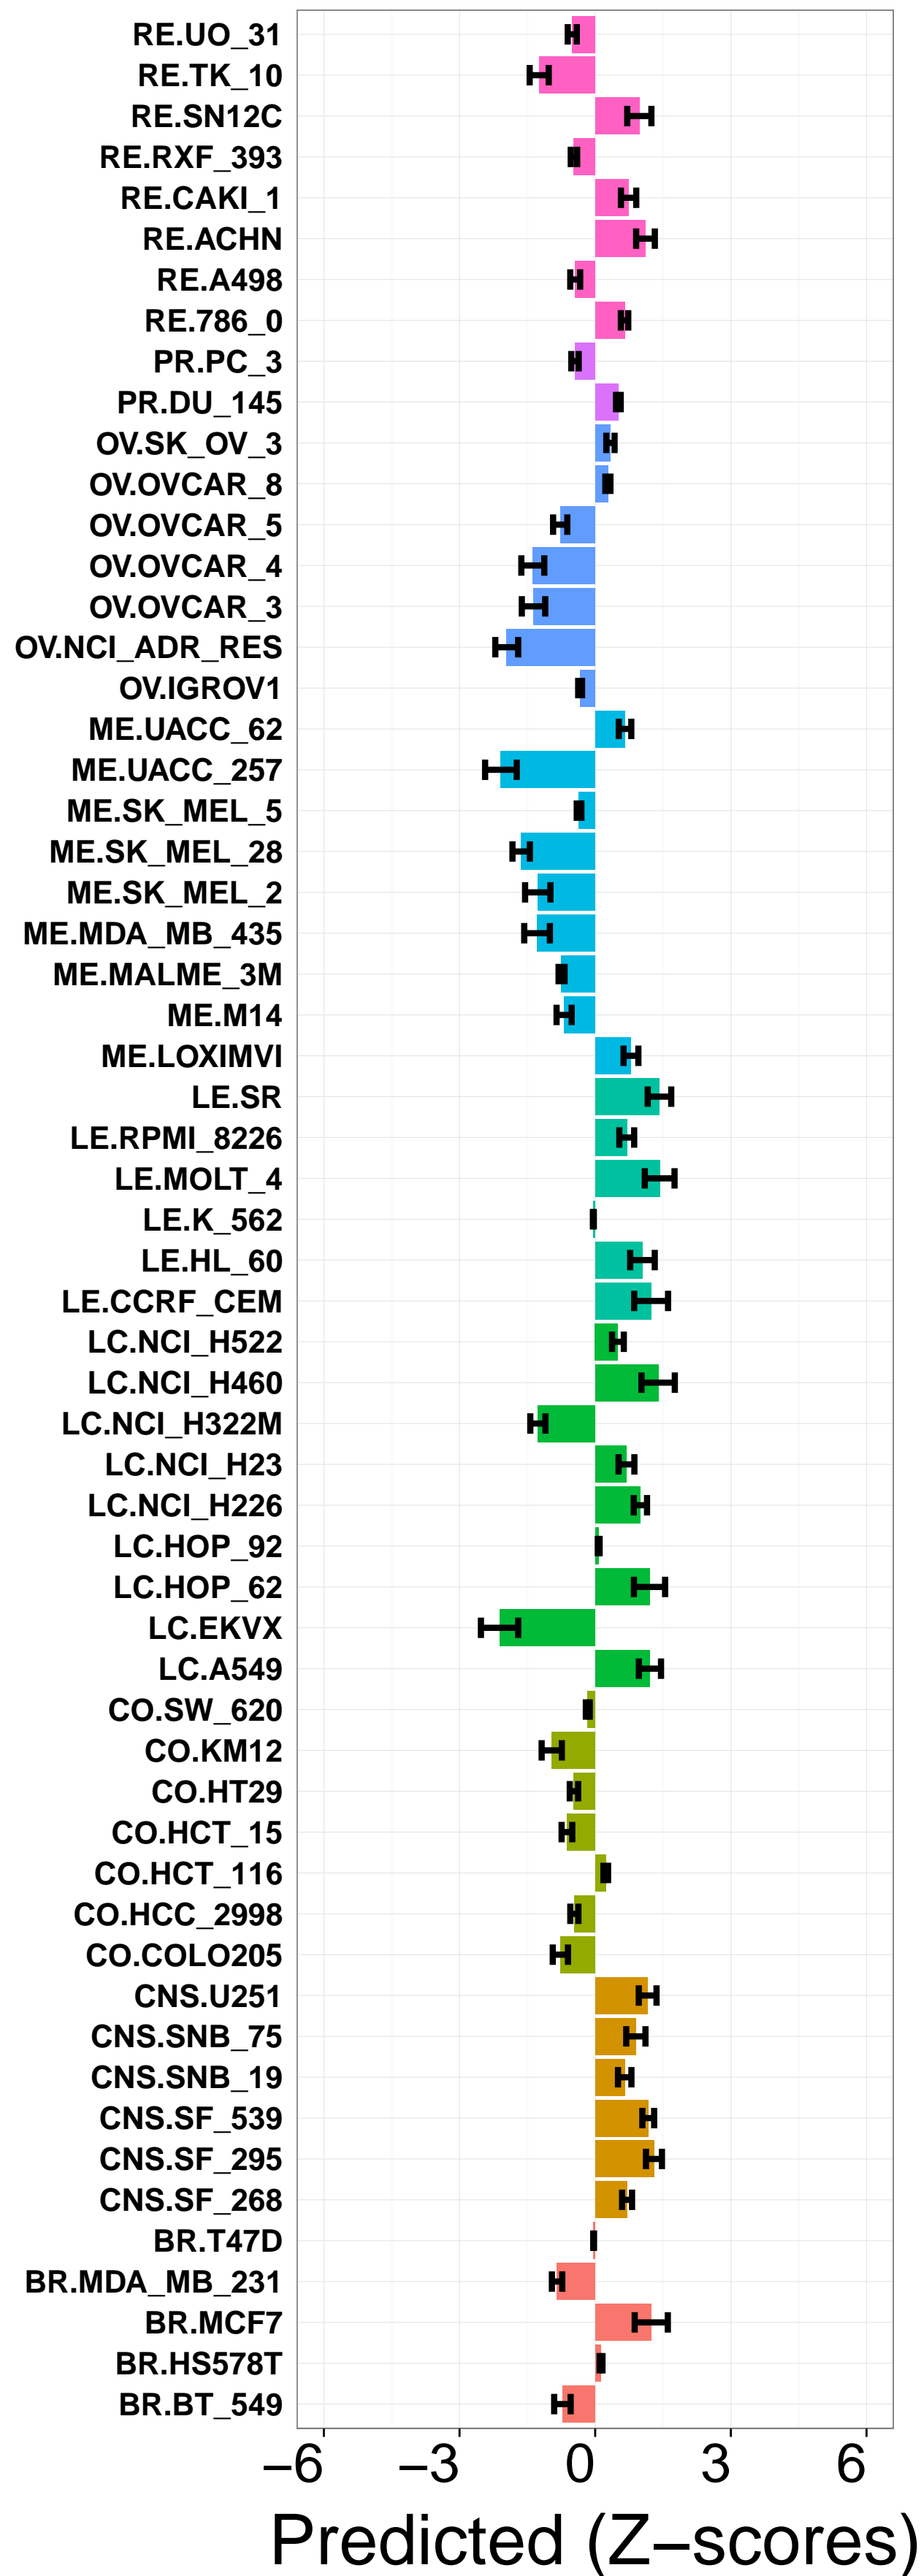

# NSC 312887, Fludarabine\_phosphate\_(USAN) (Interpolation)

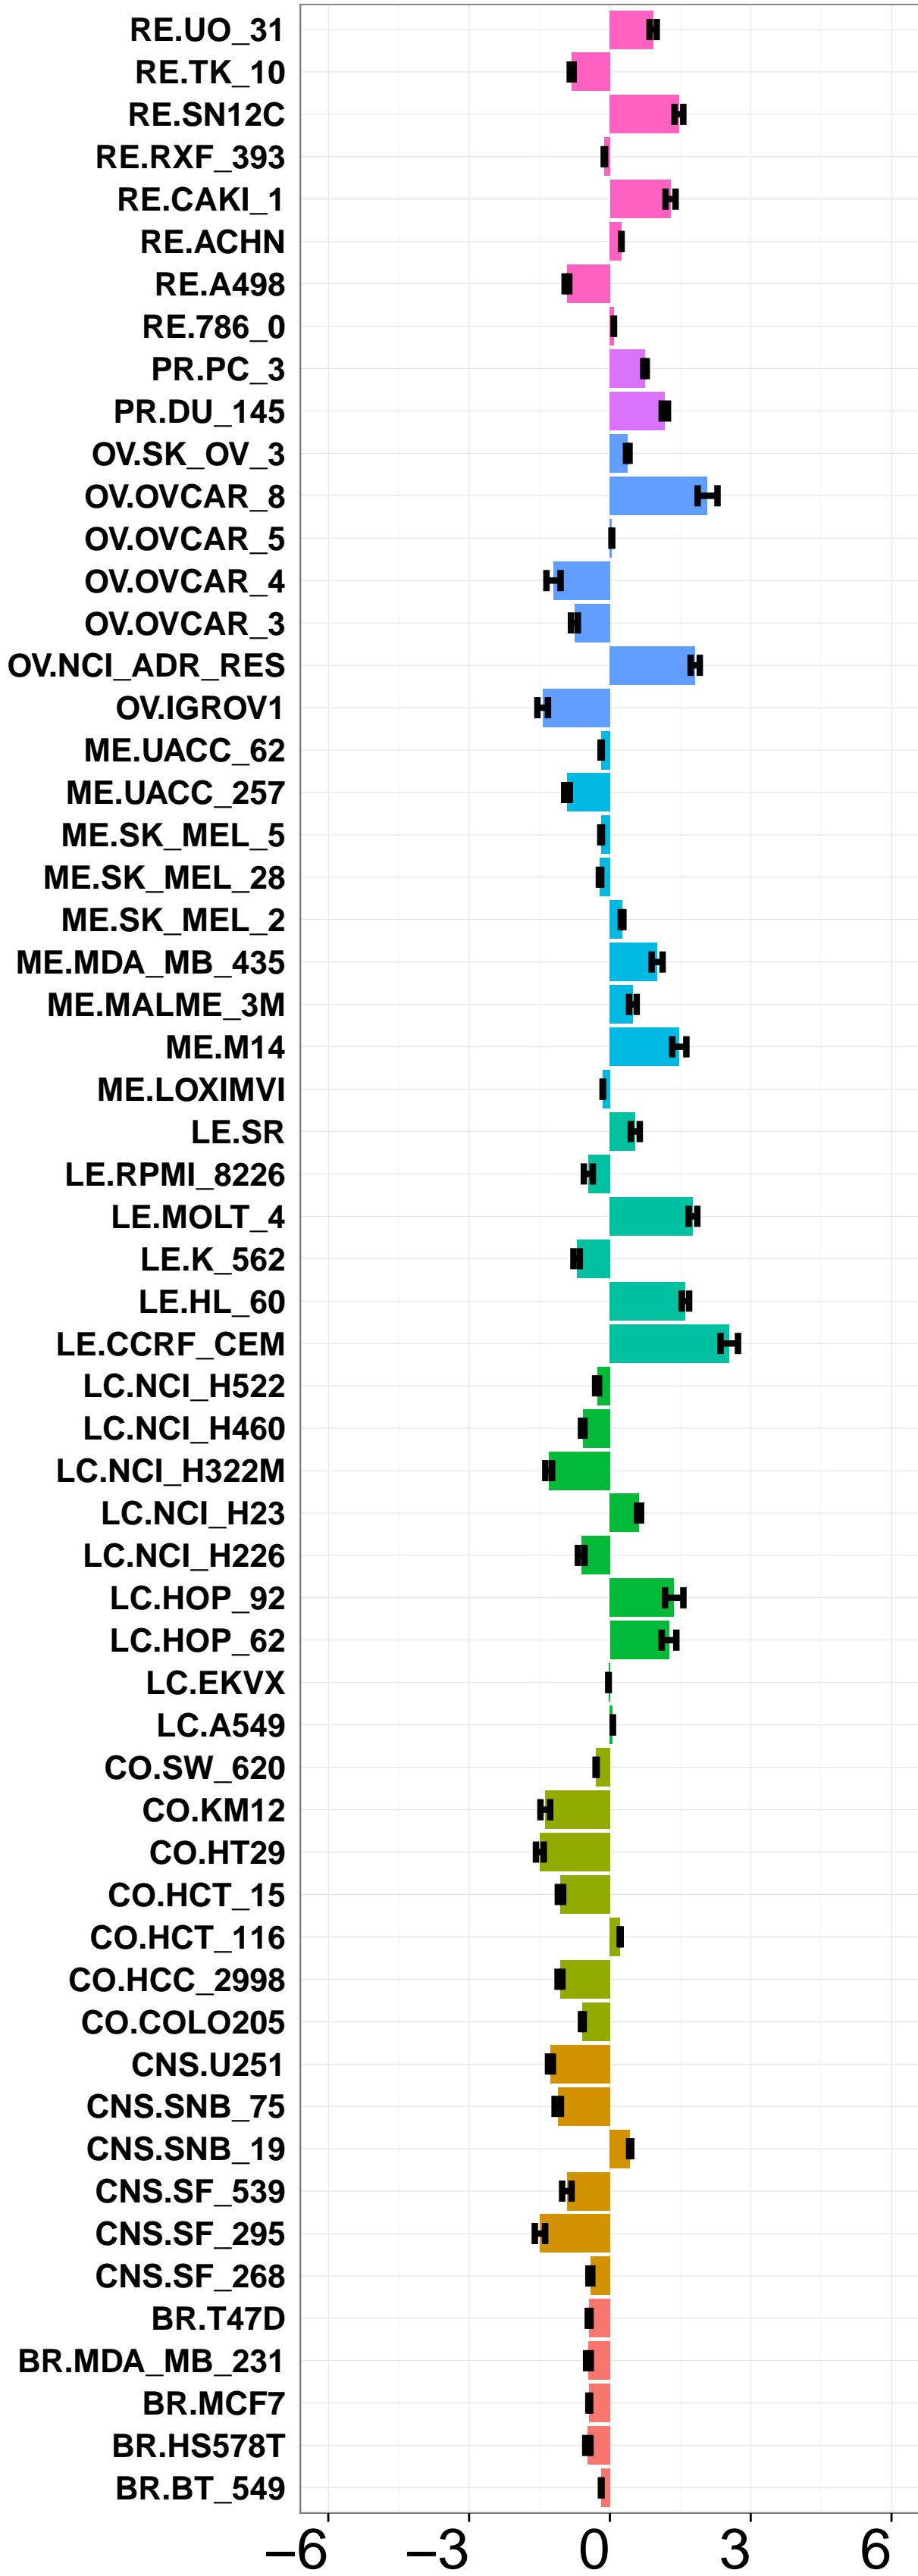

Observed (Z-scores)

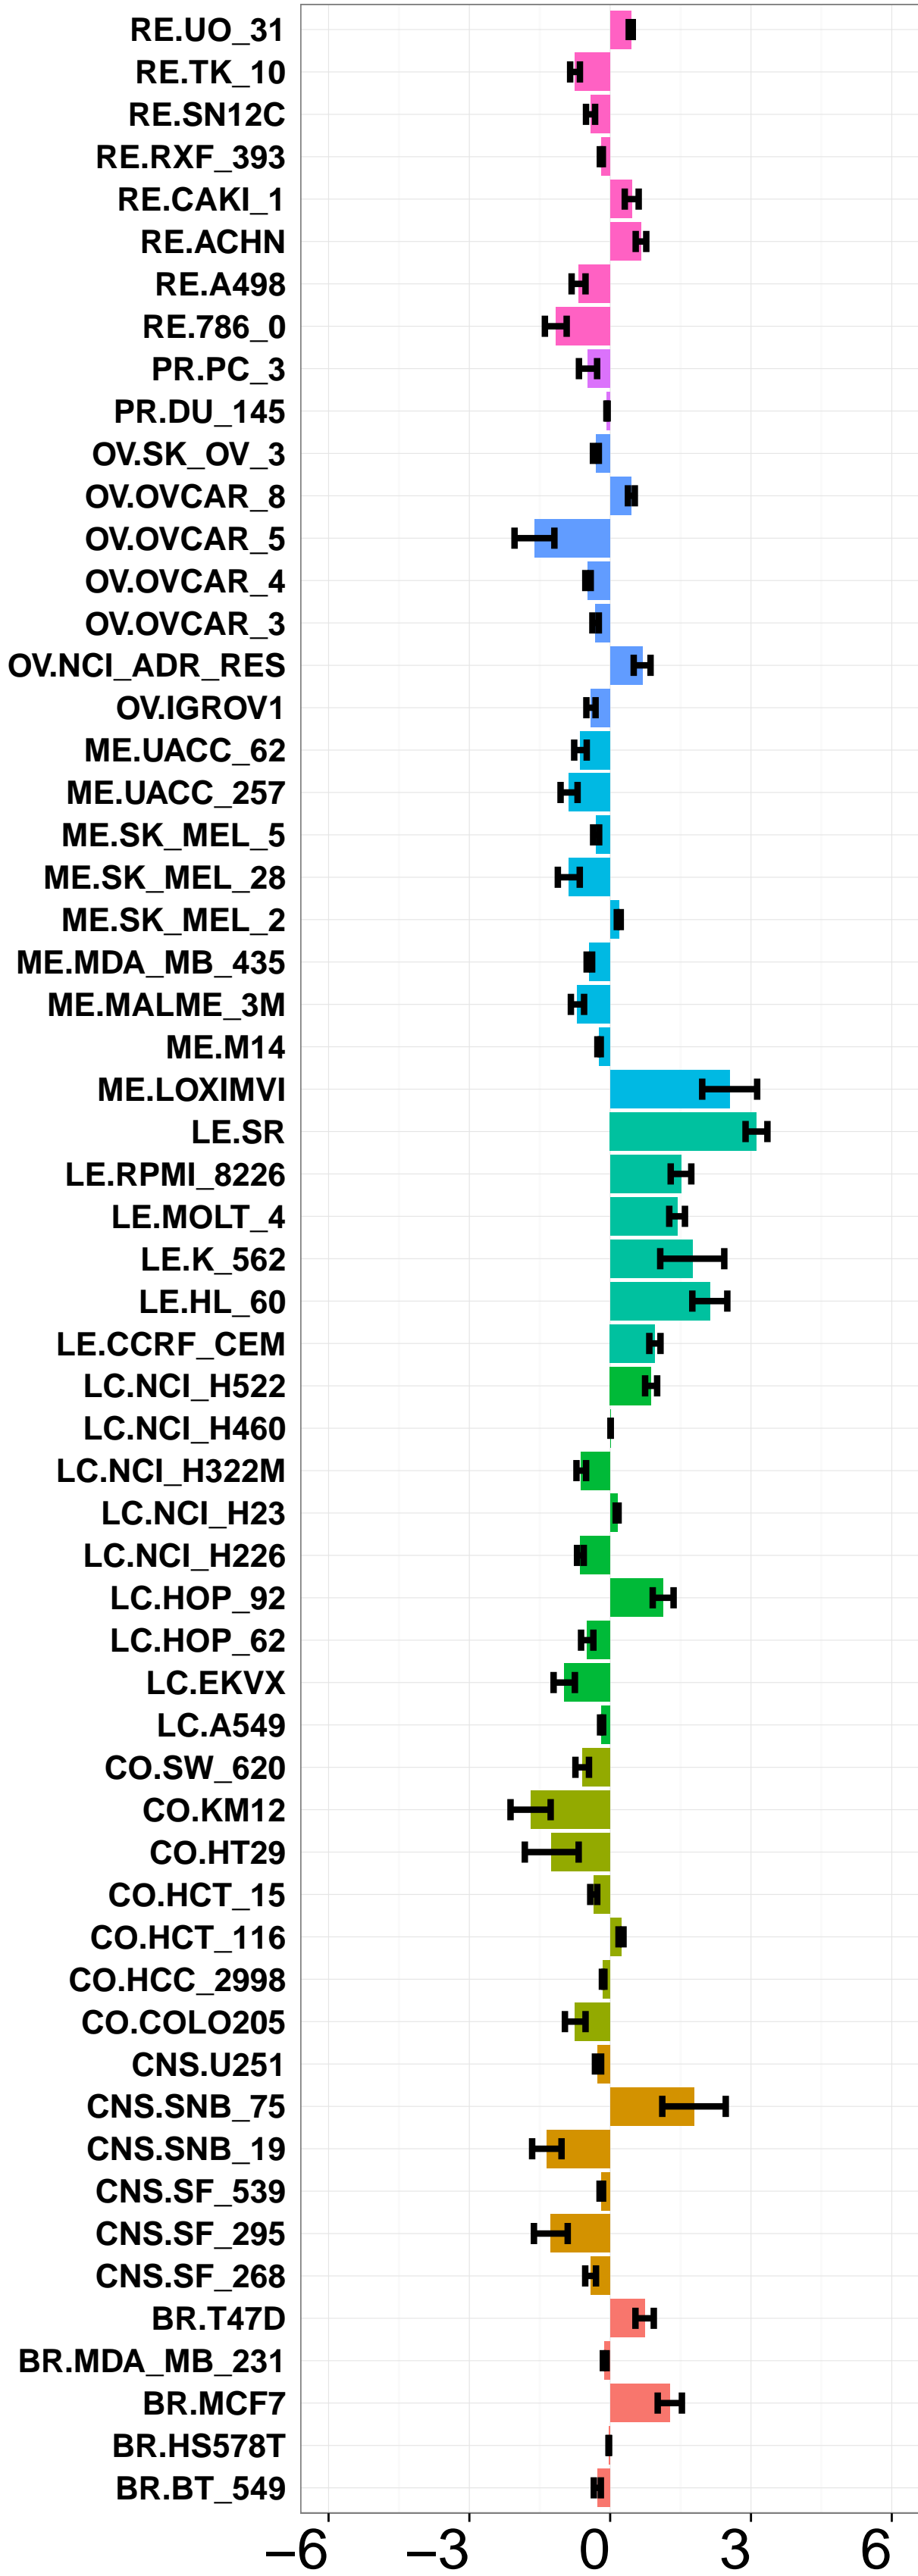

Predicted (Z-scores)

# NSC 330507, Tanespimycin (Interpolation)

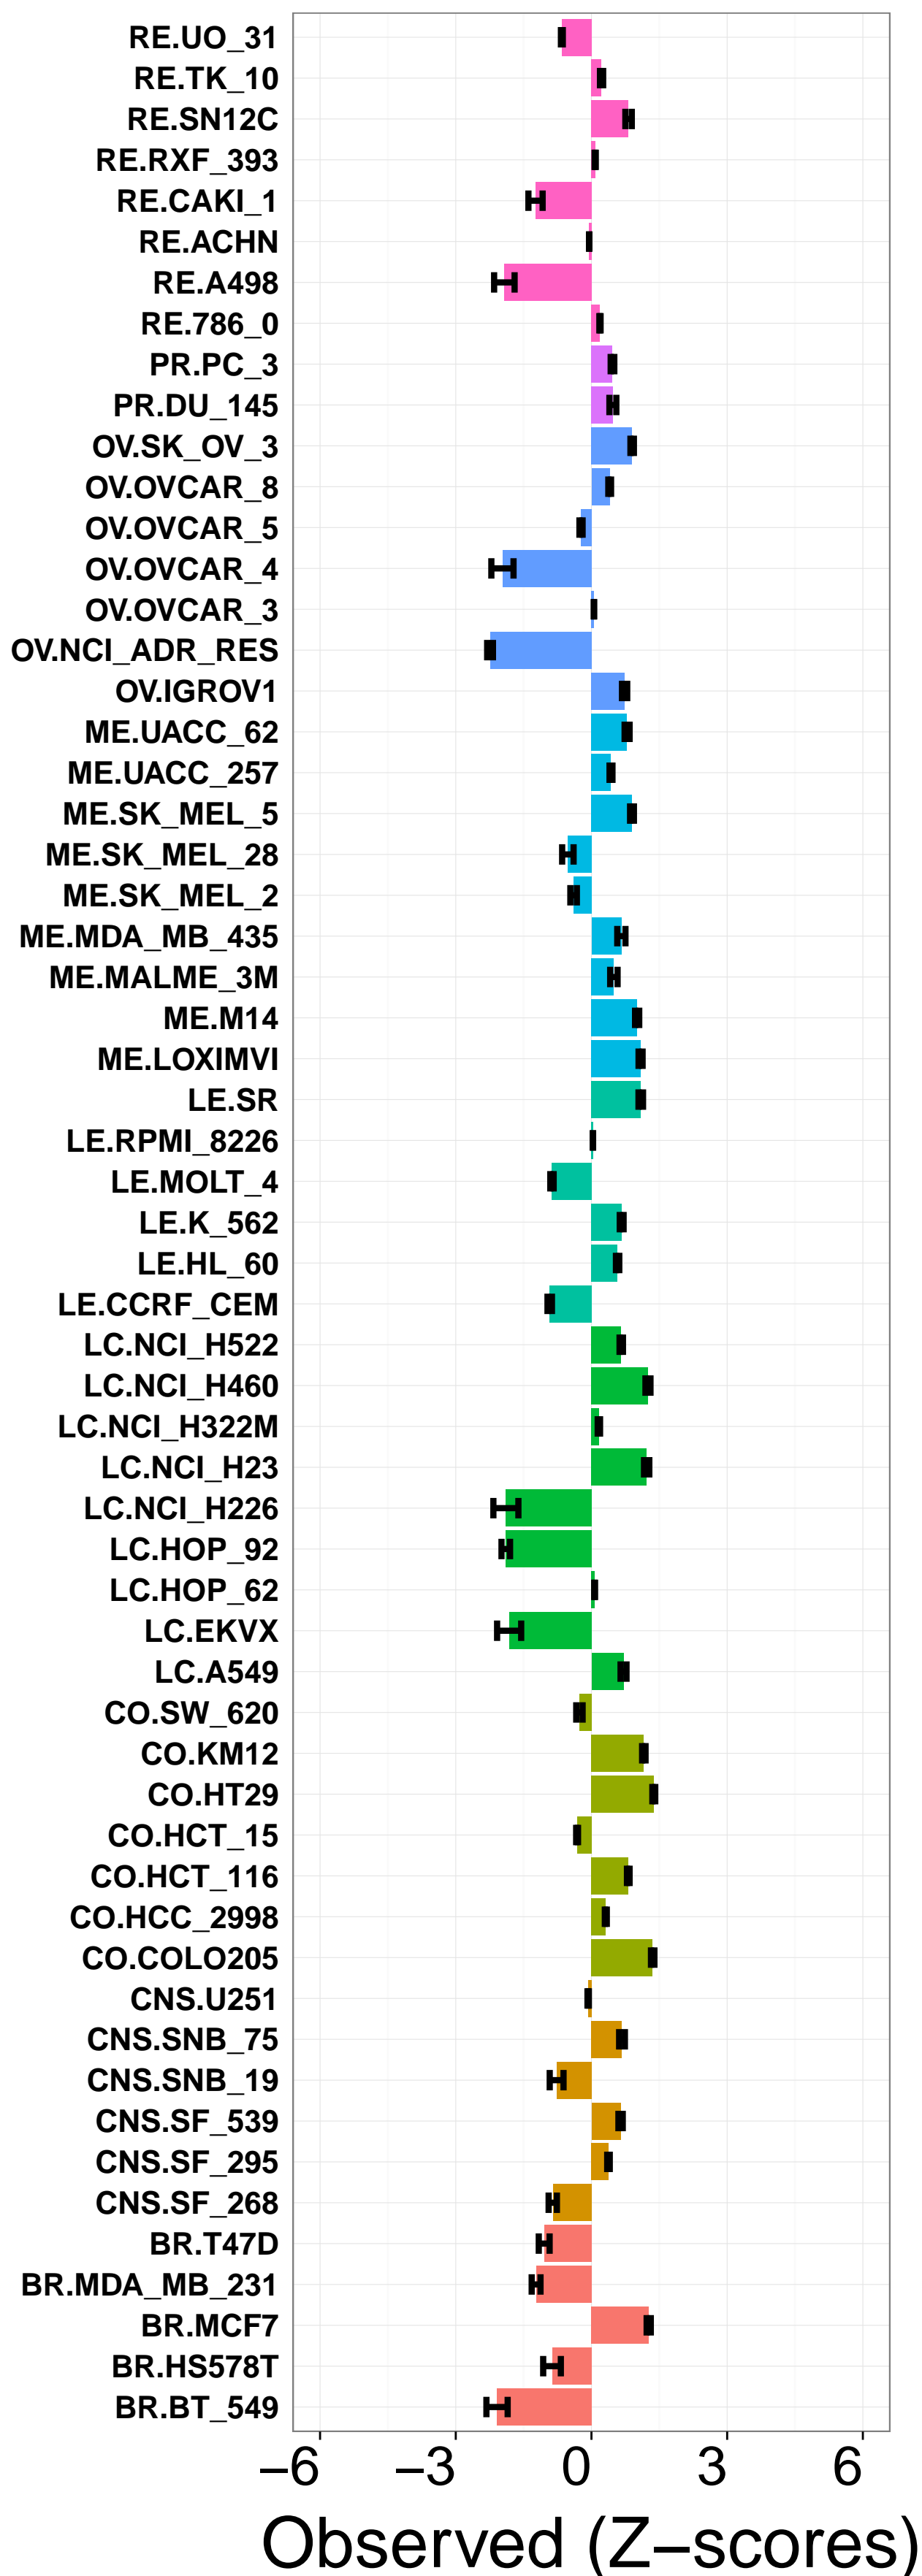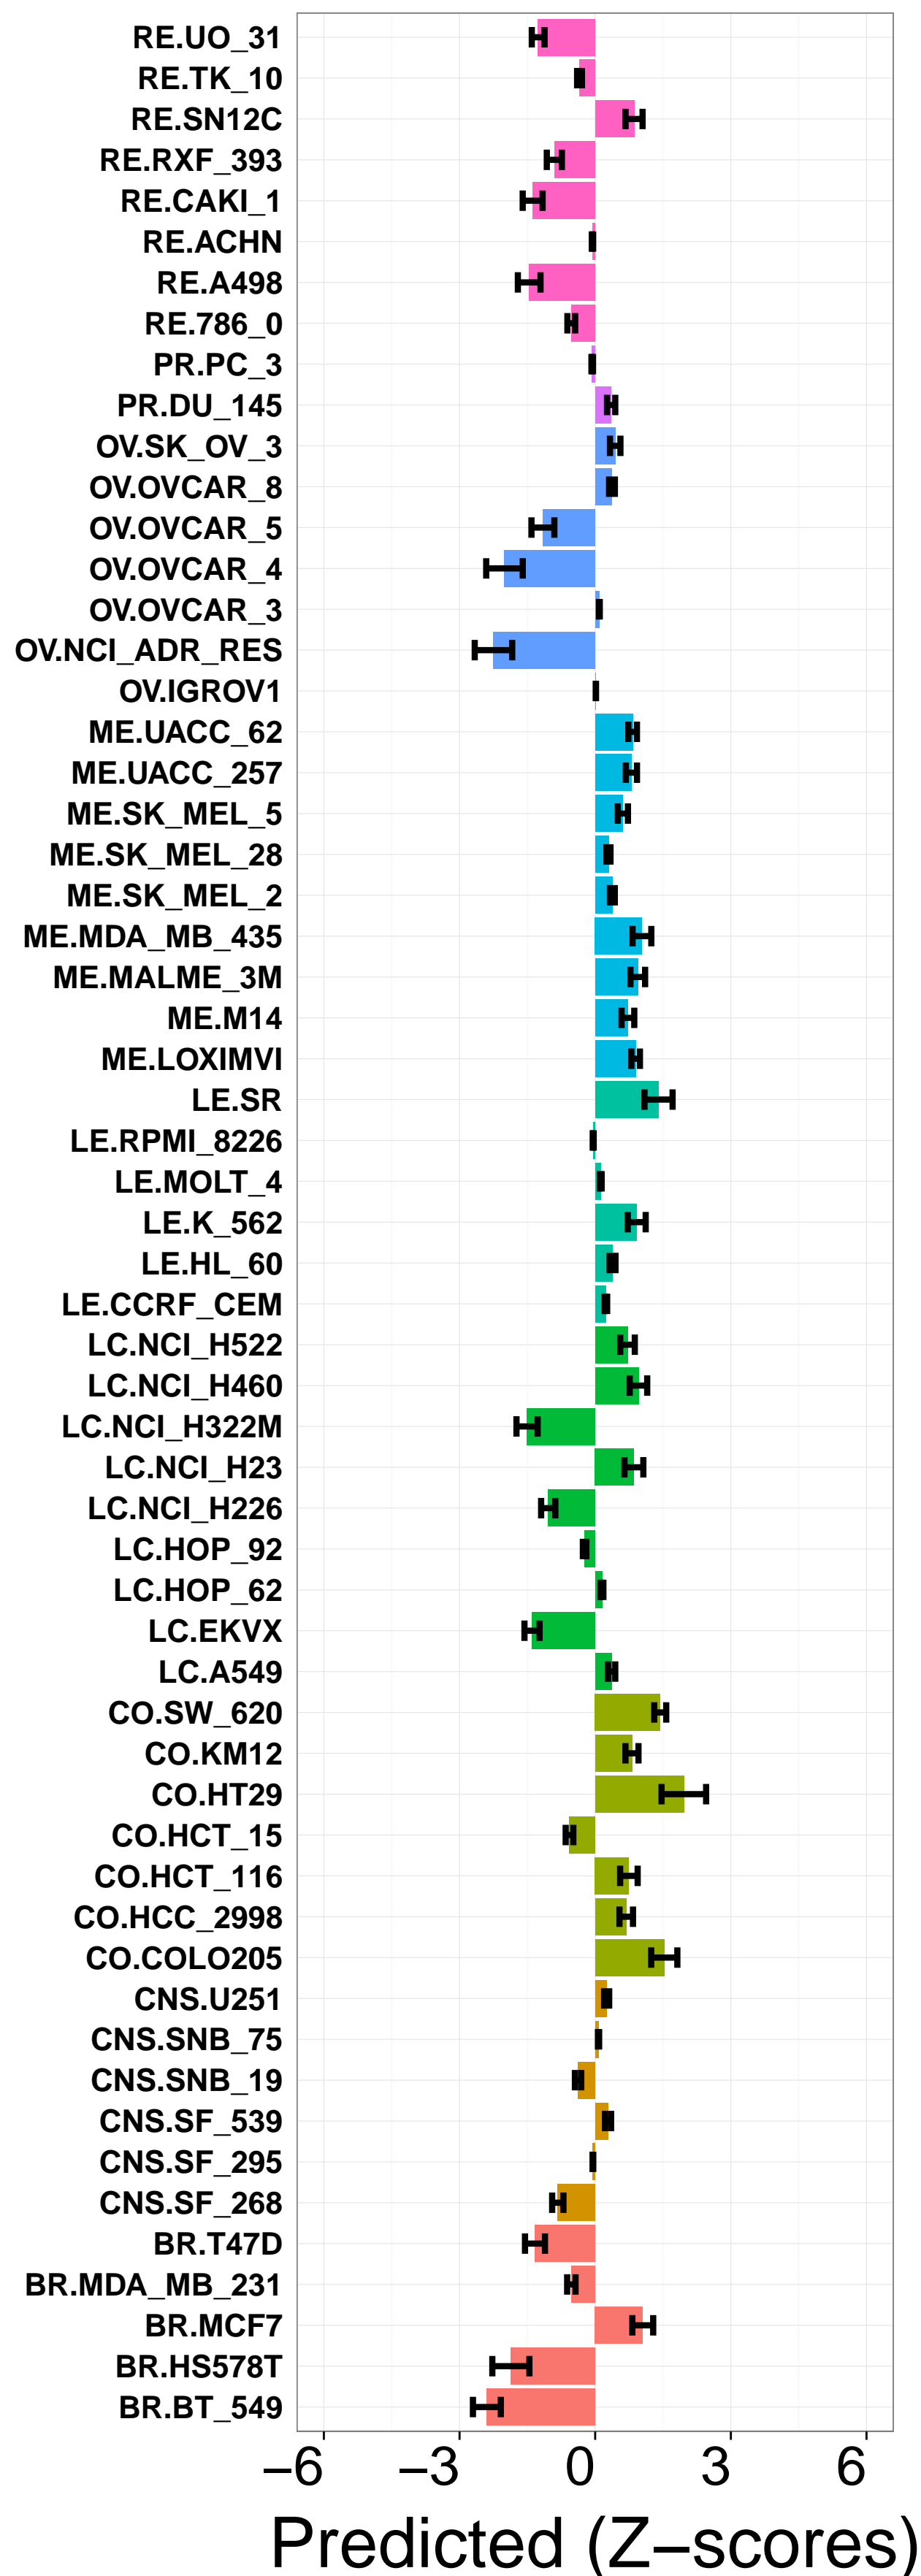



# NSC 34521, Dextromethorphan\_Hydrobromide (Interpolation)

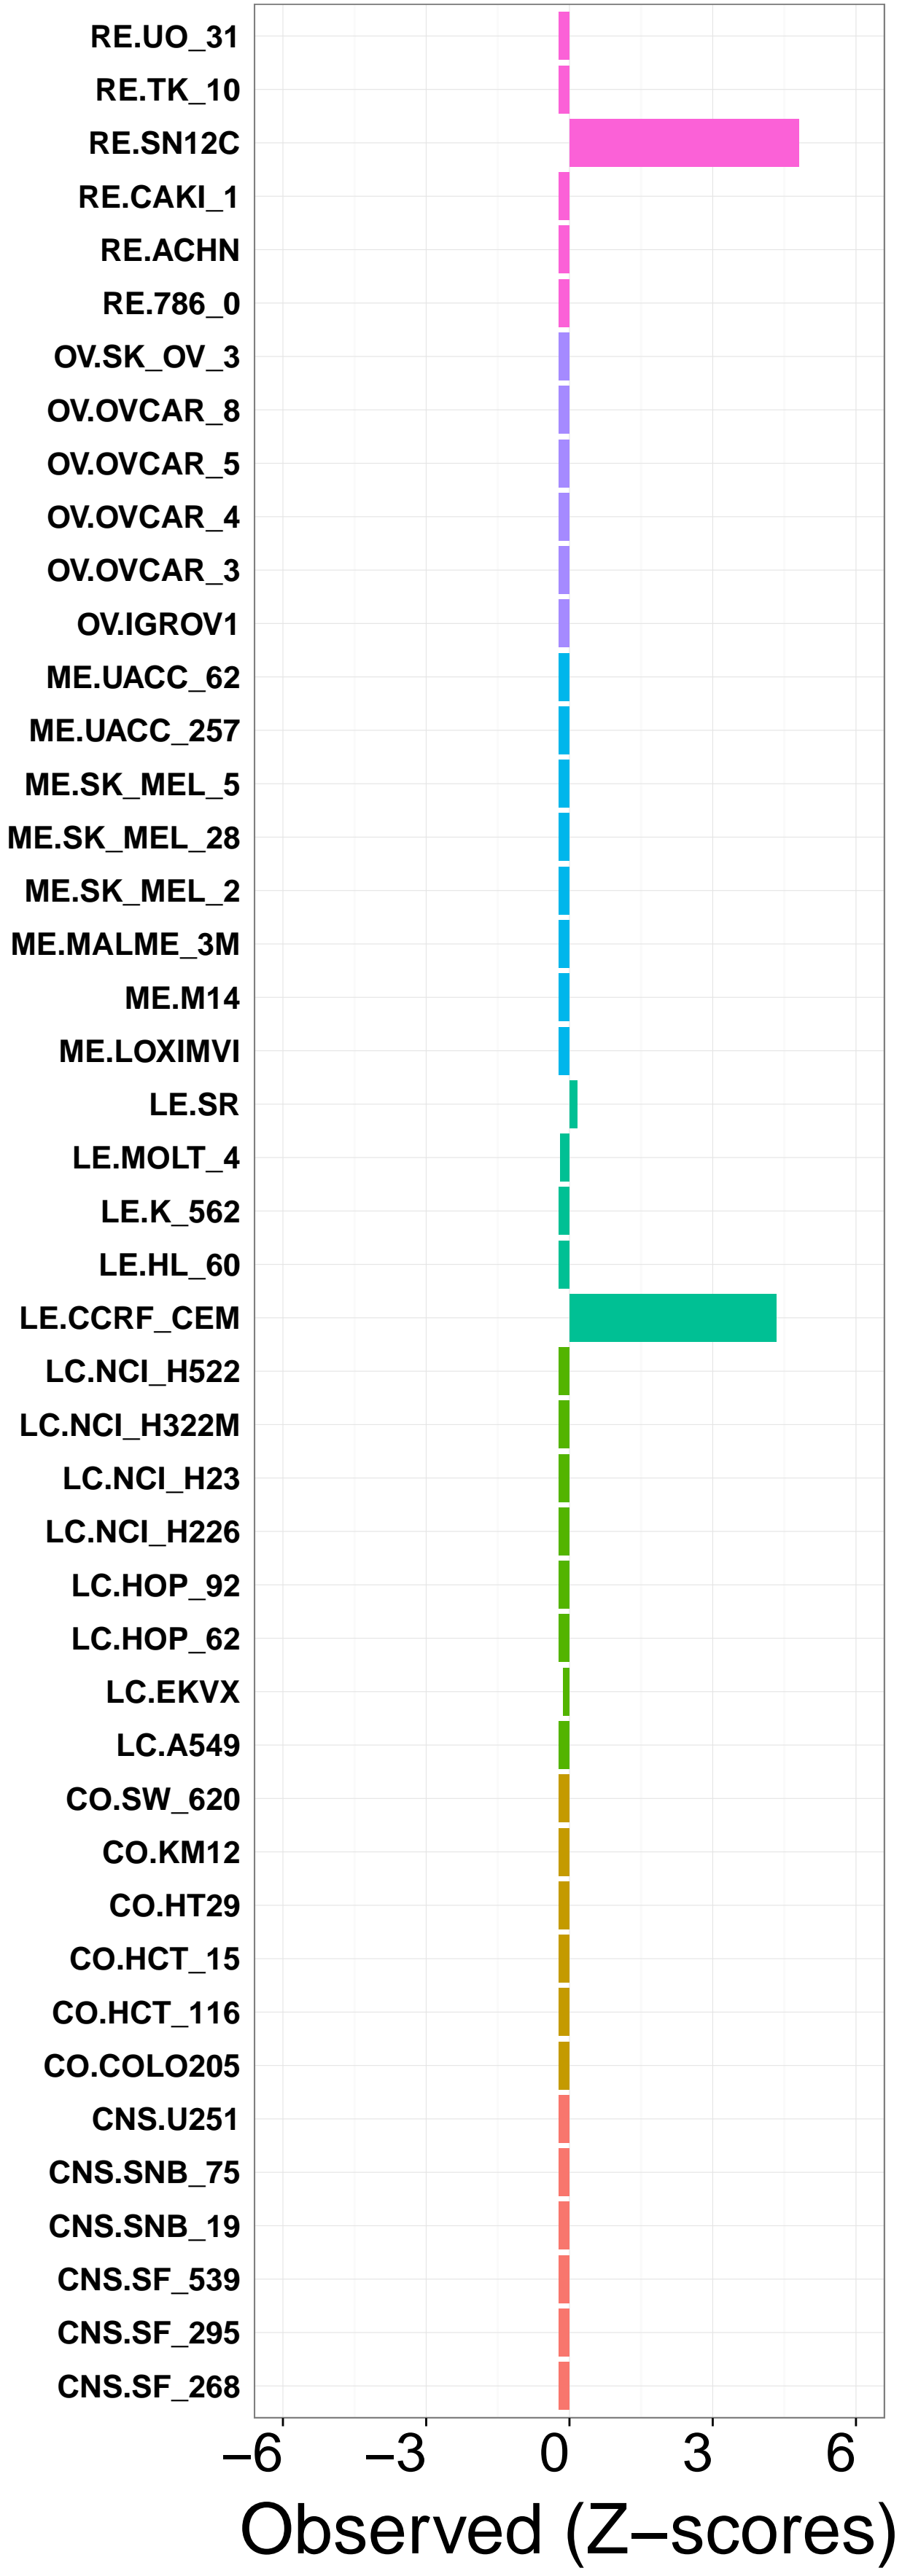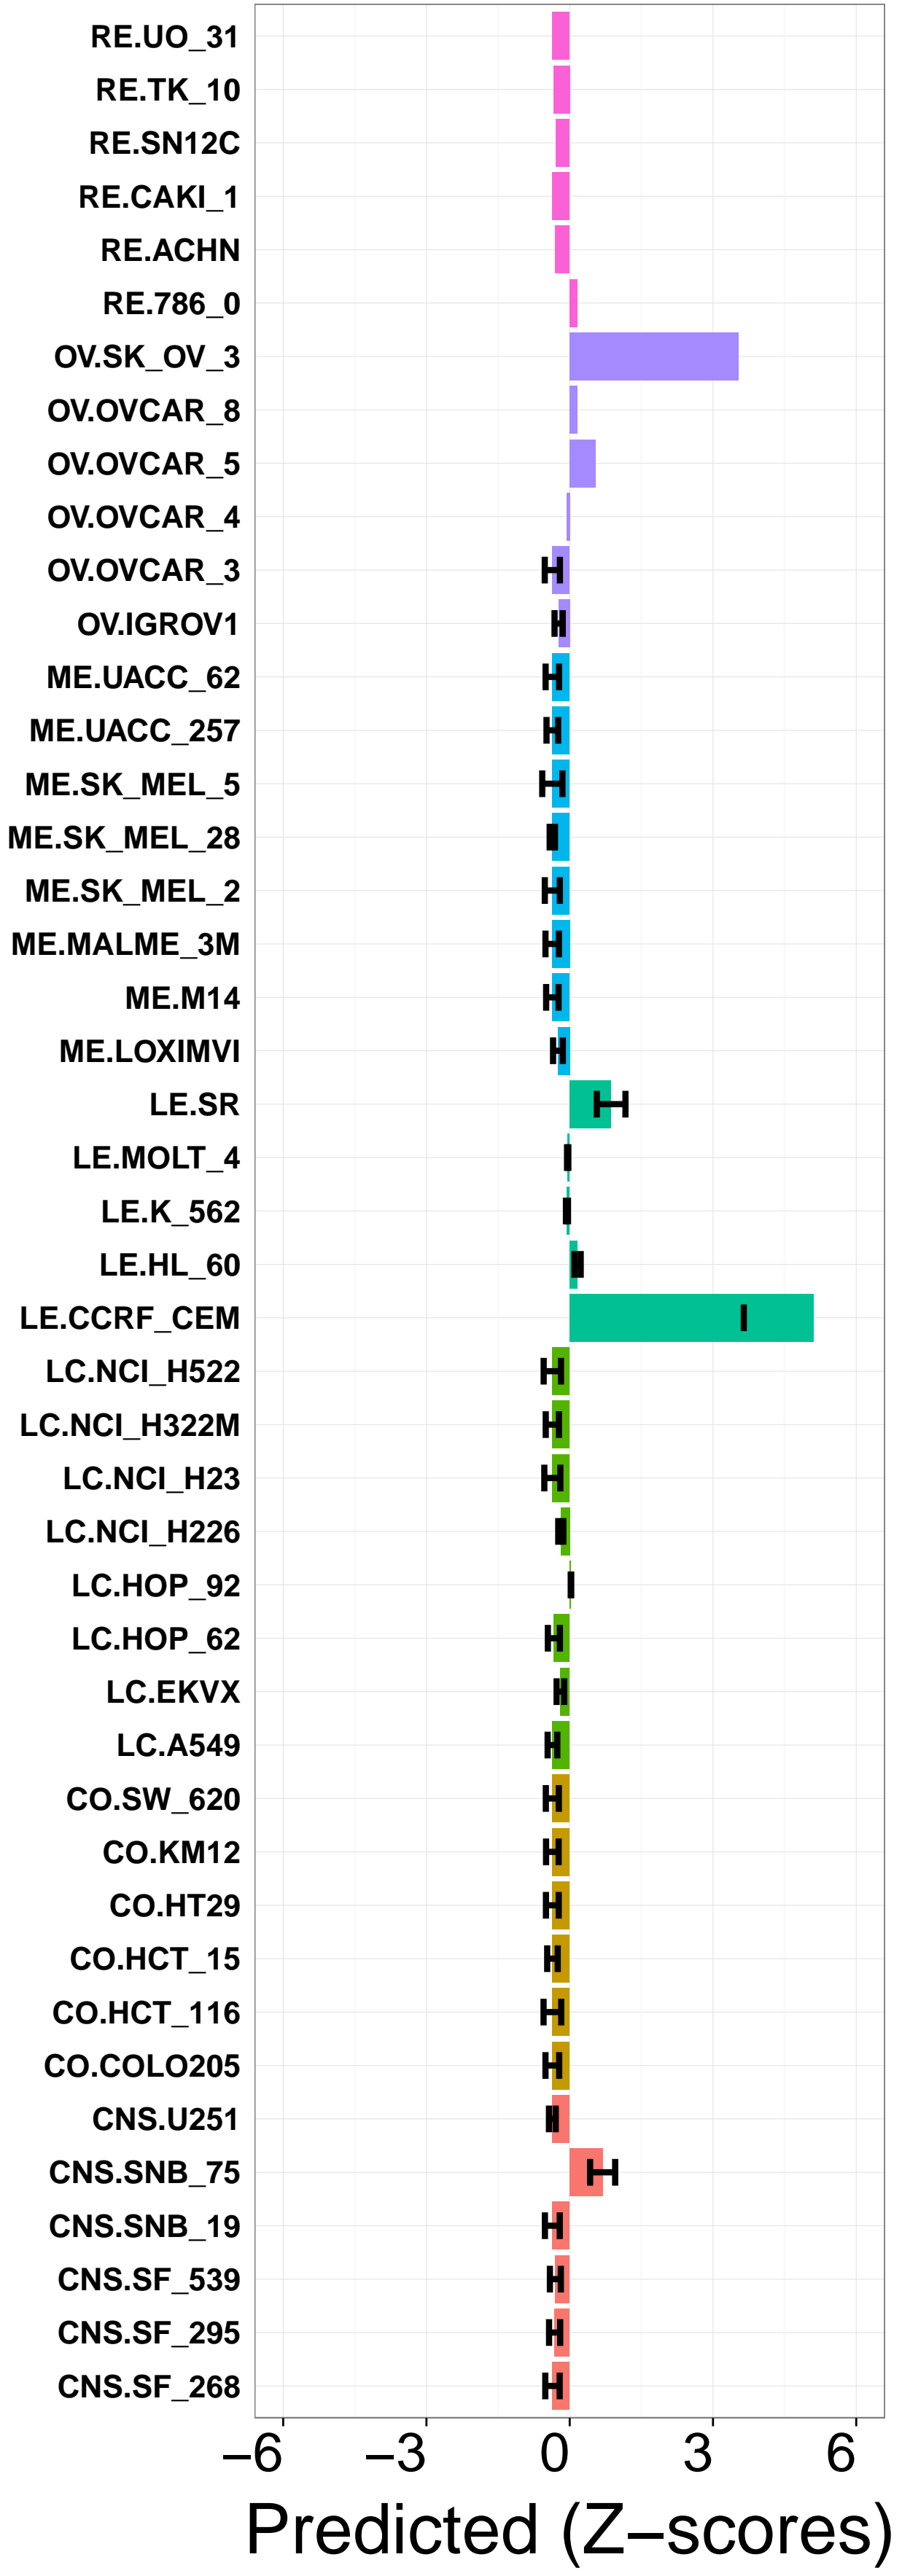

# NSC 354258, 8-Chloro-Adenosine (Interpolation)

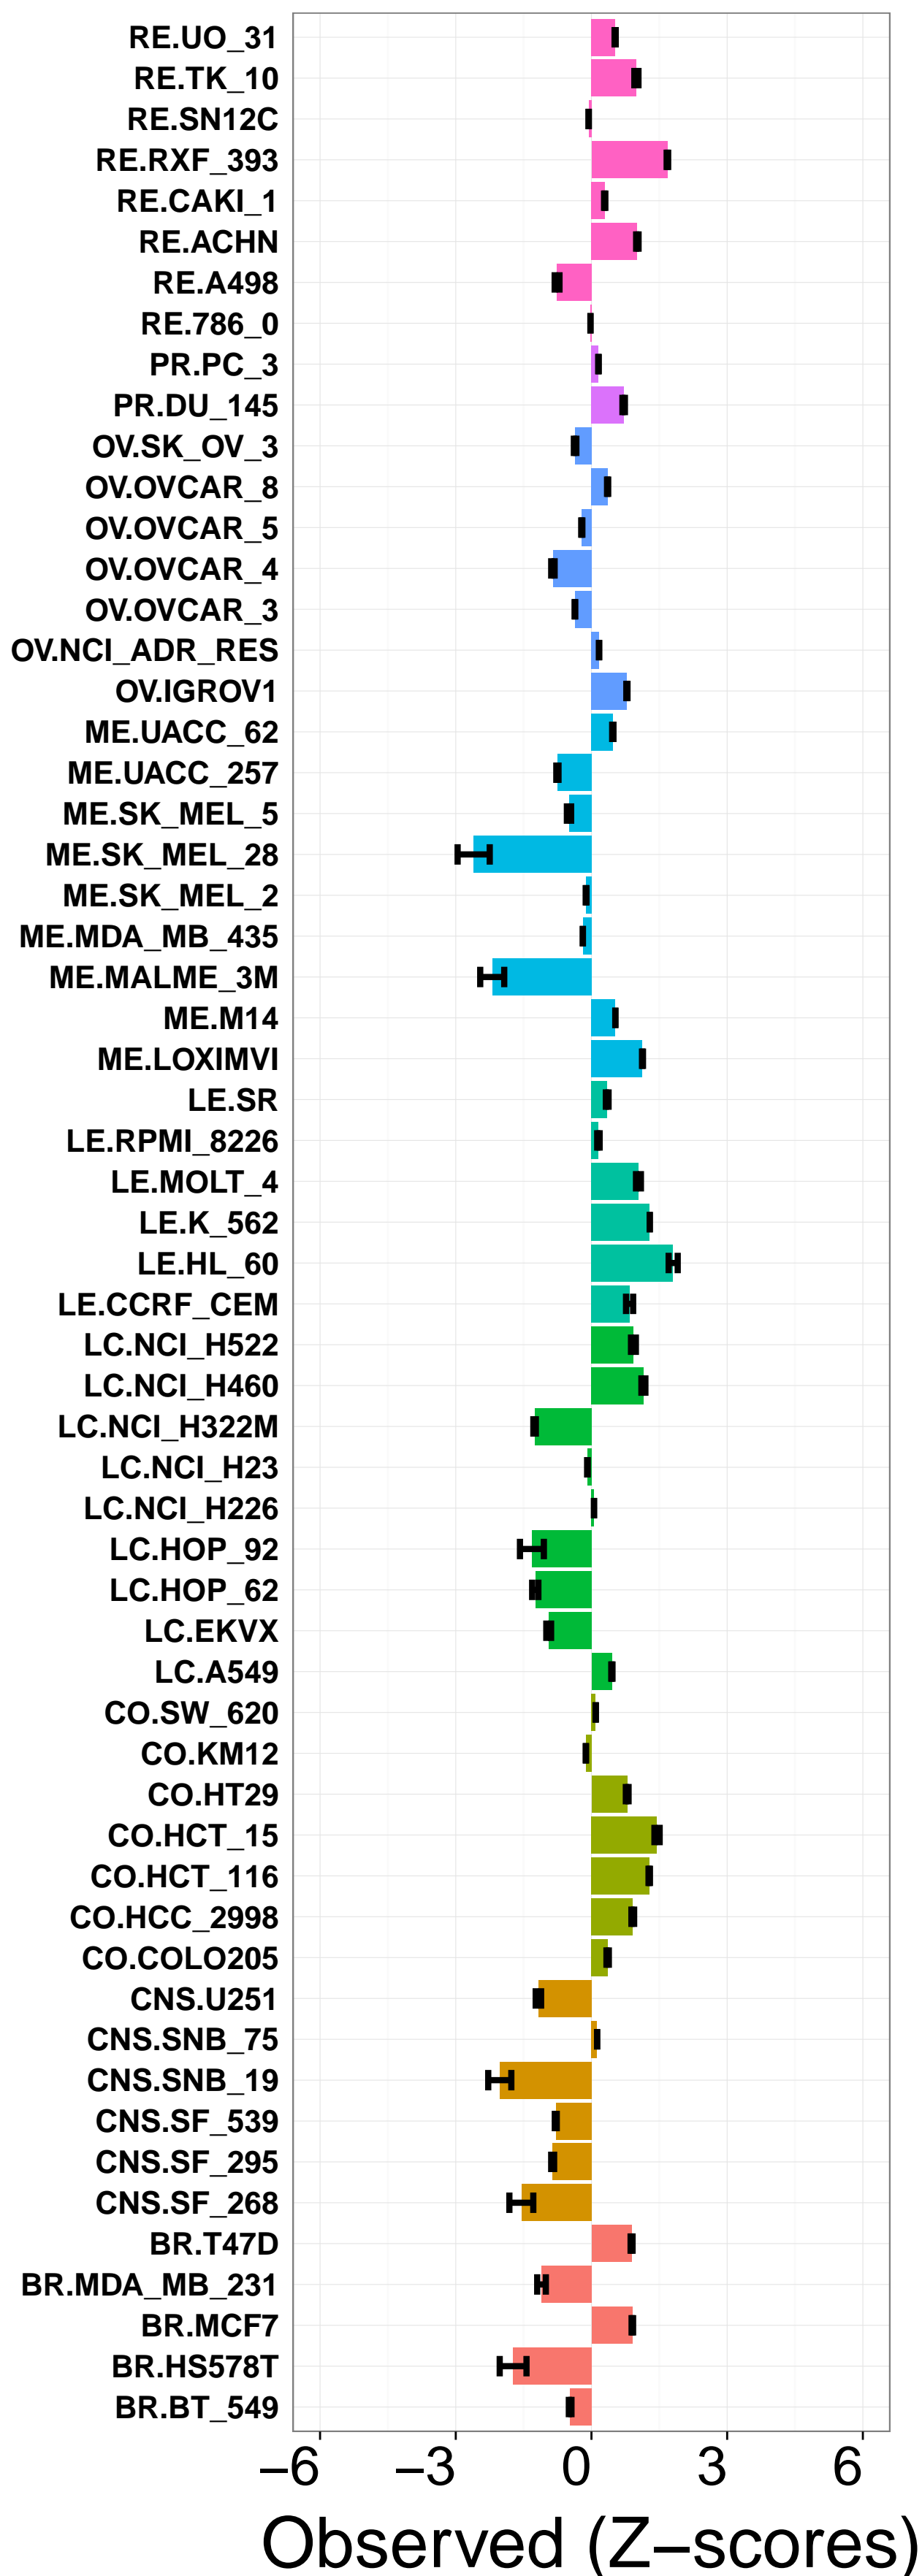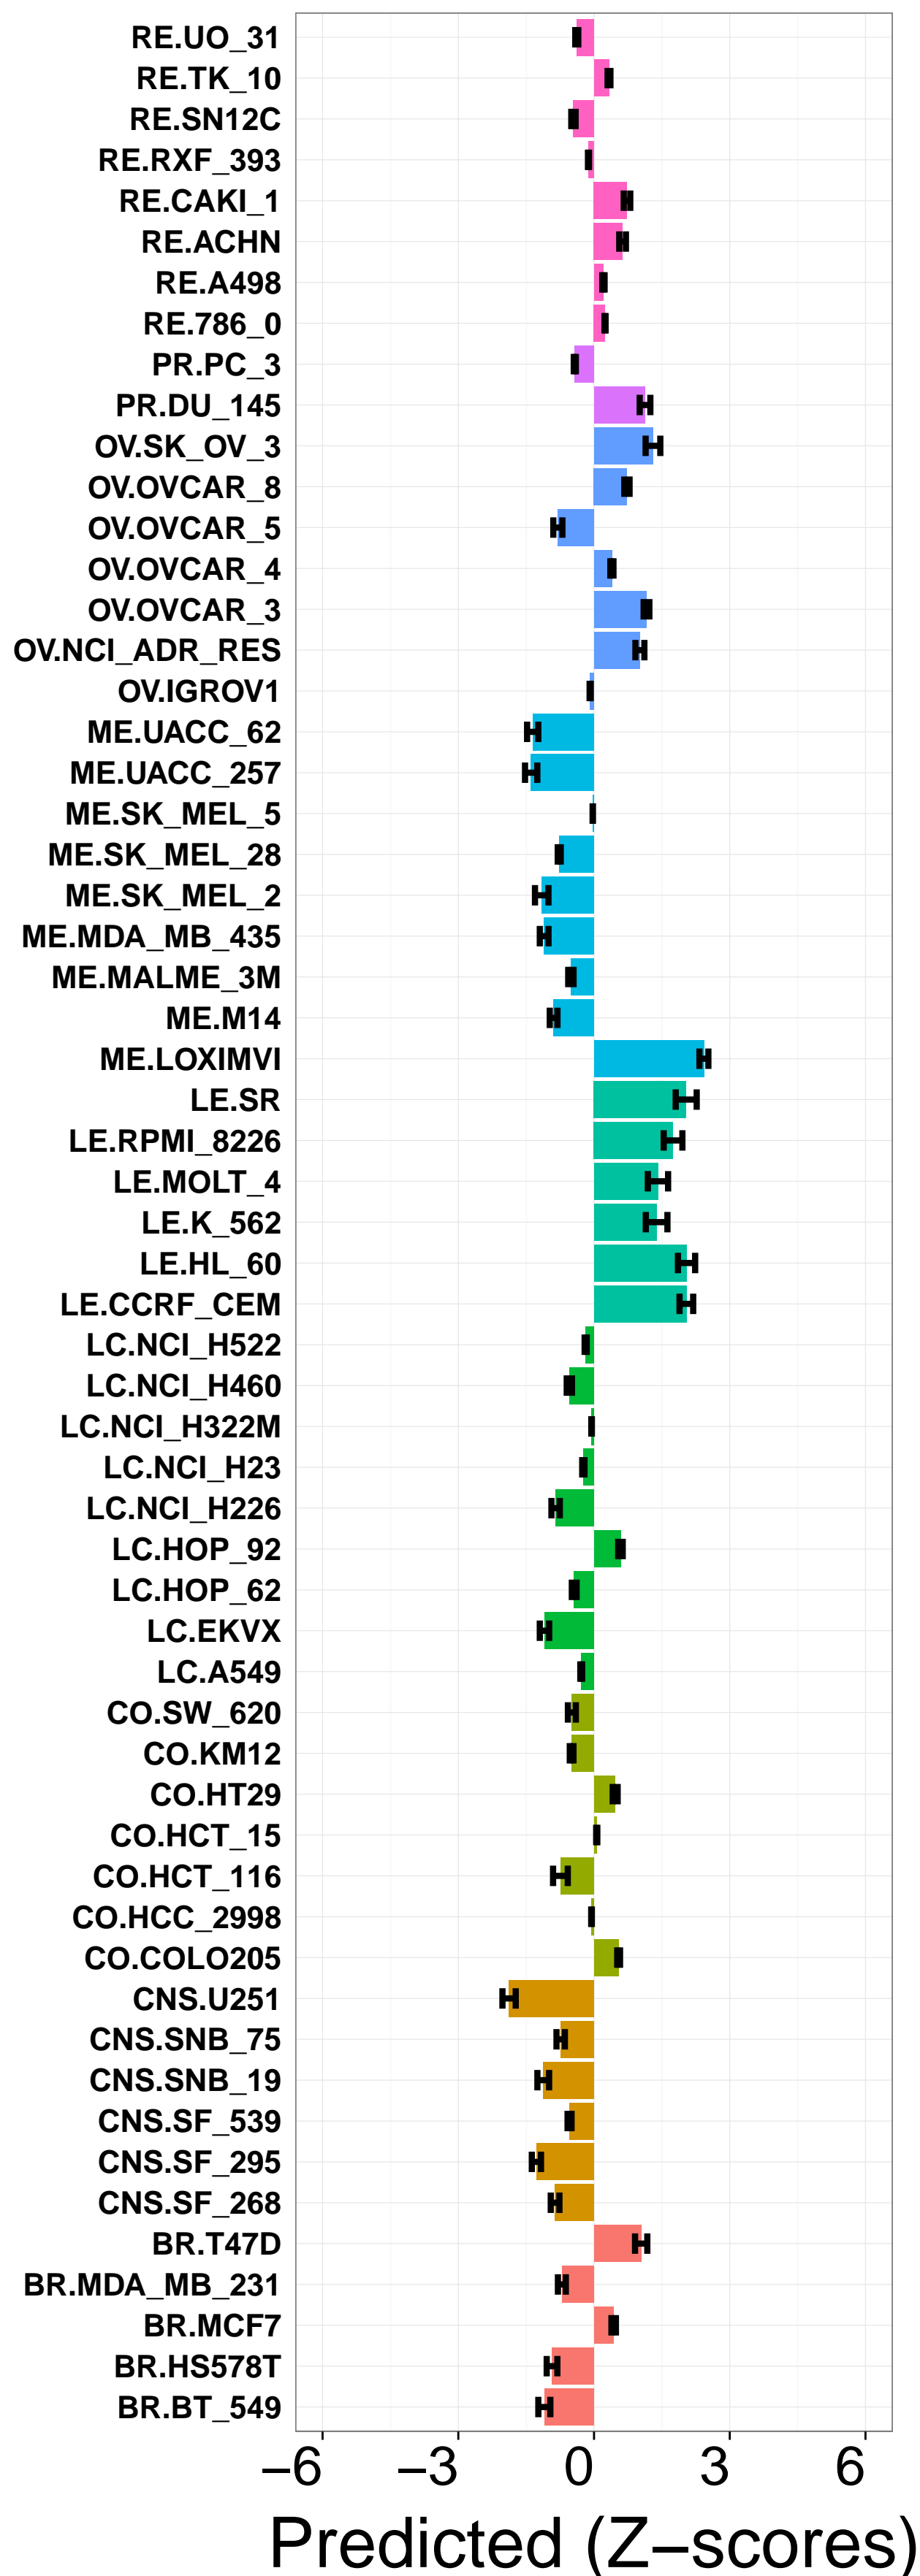

# NSC 354462, Hypothemycin (Interpolation)

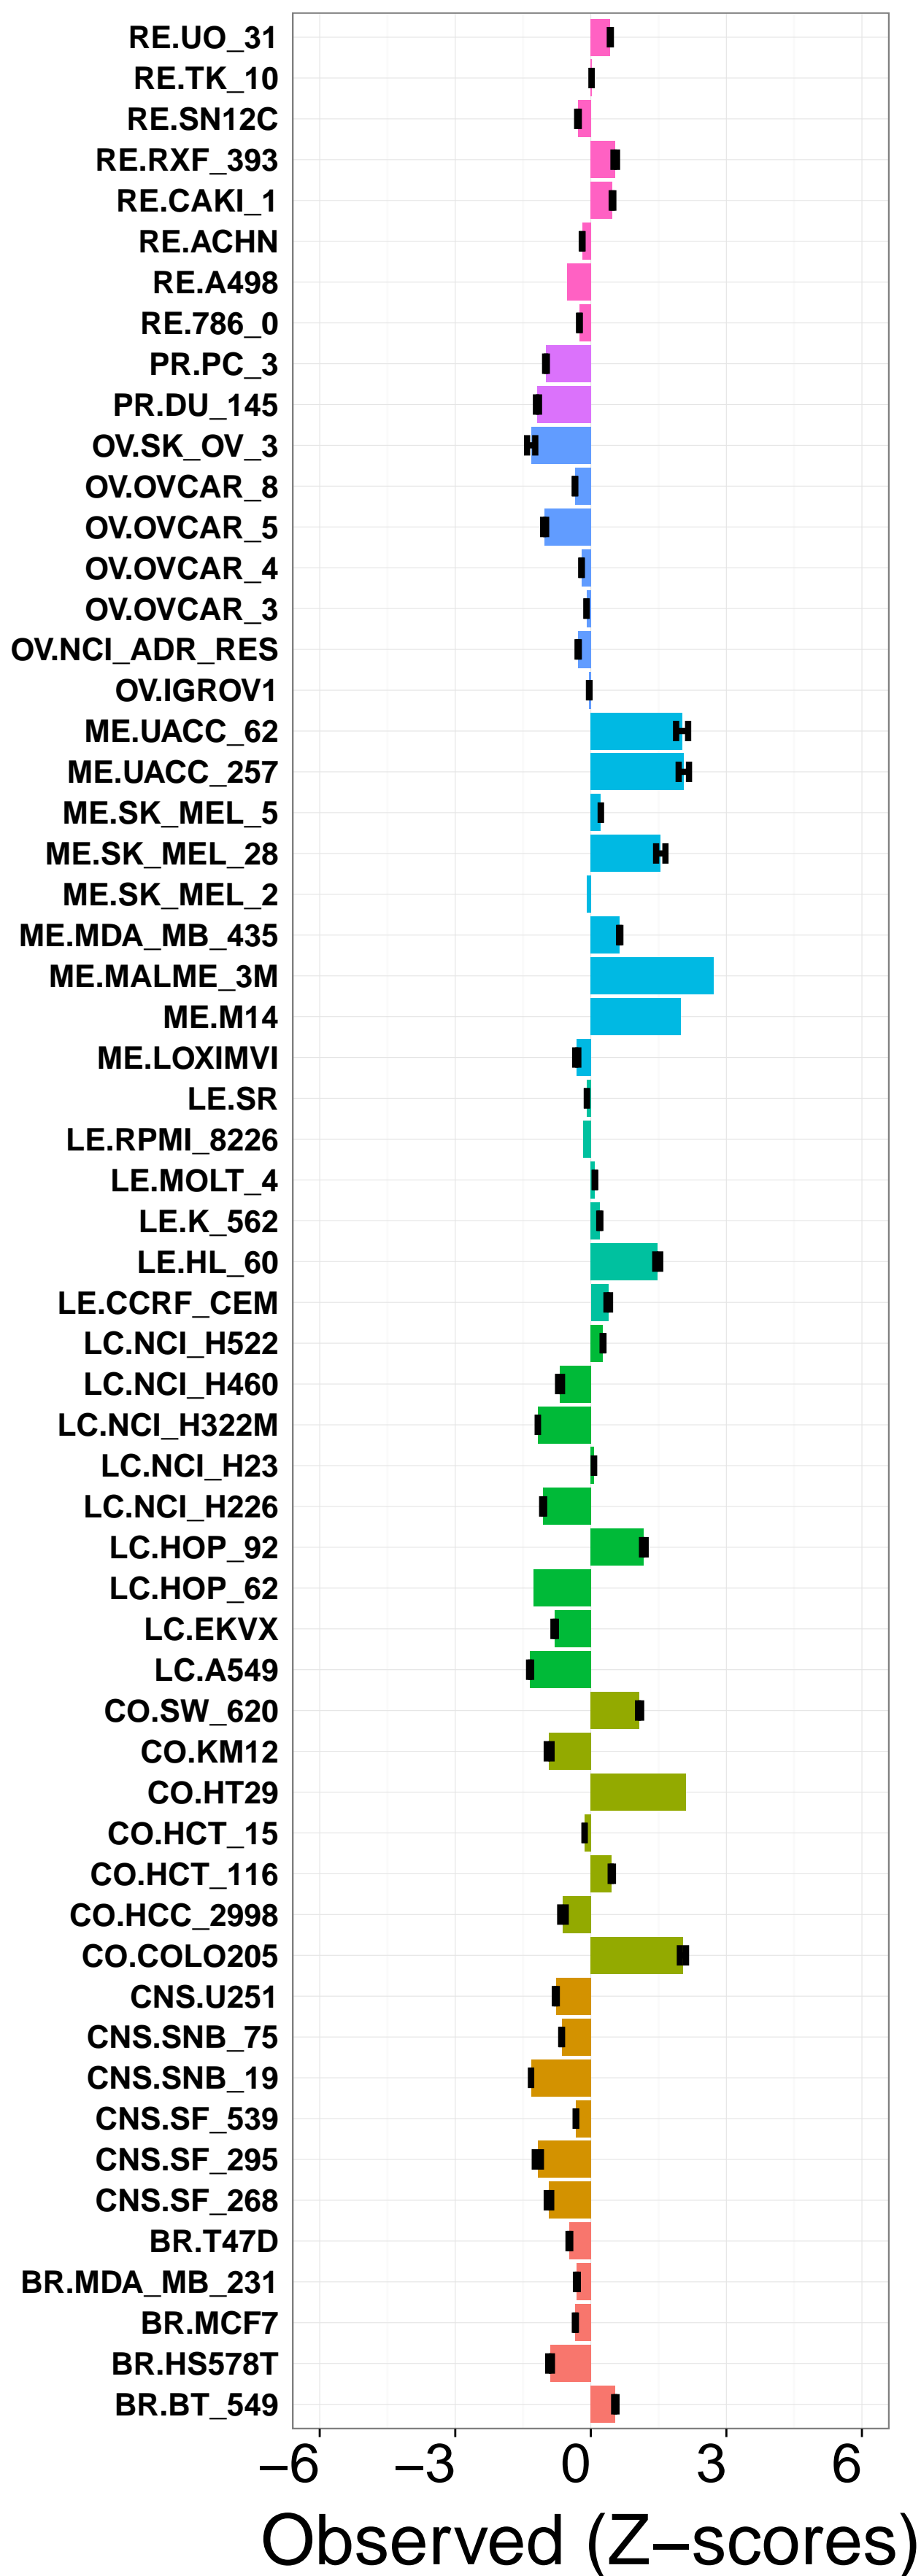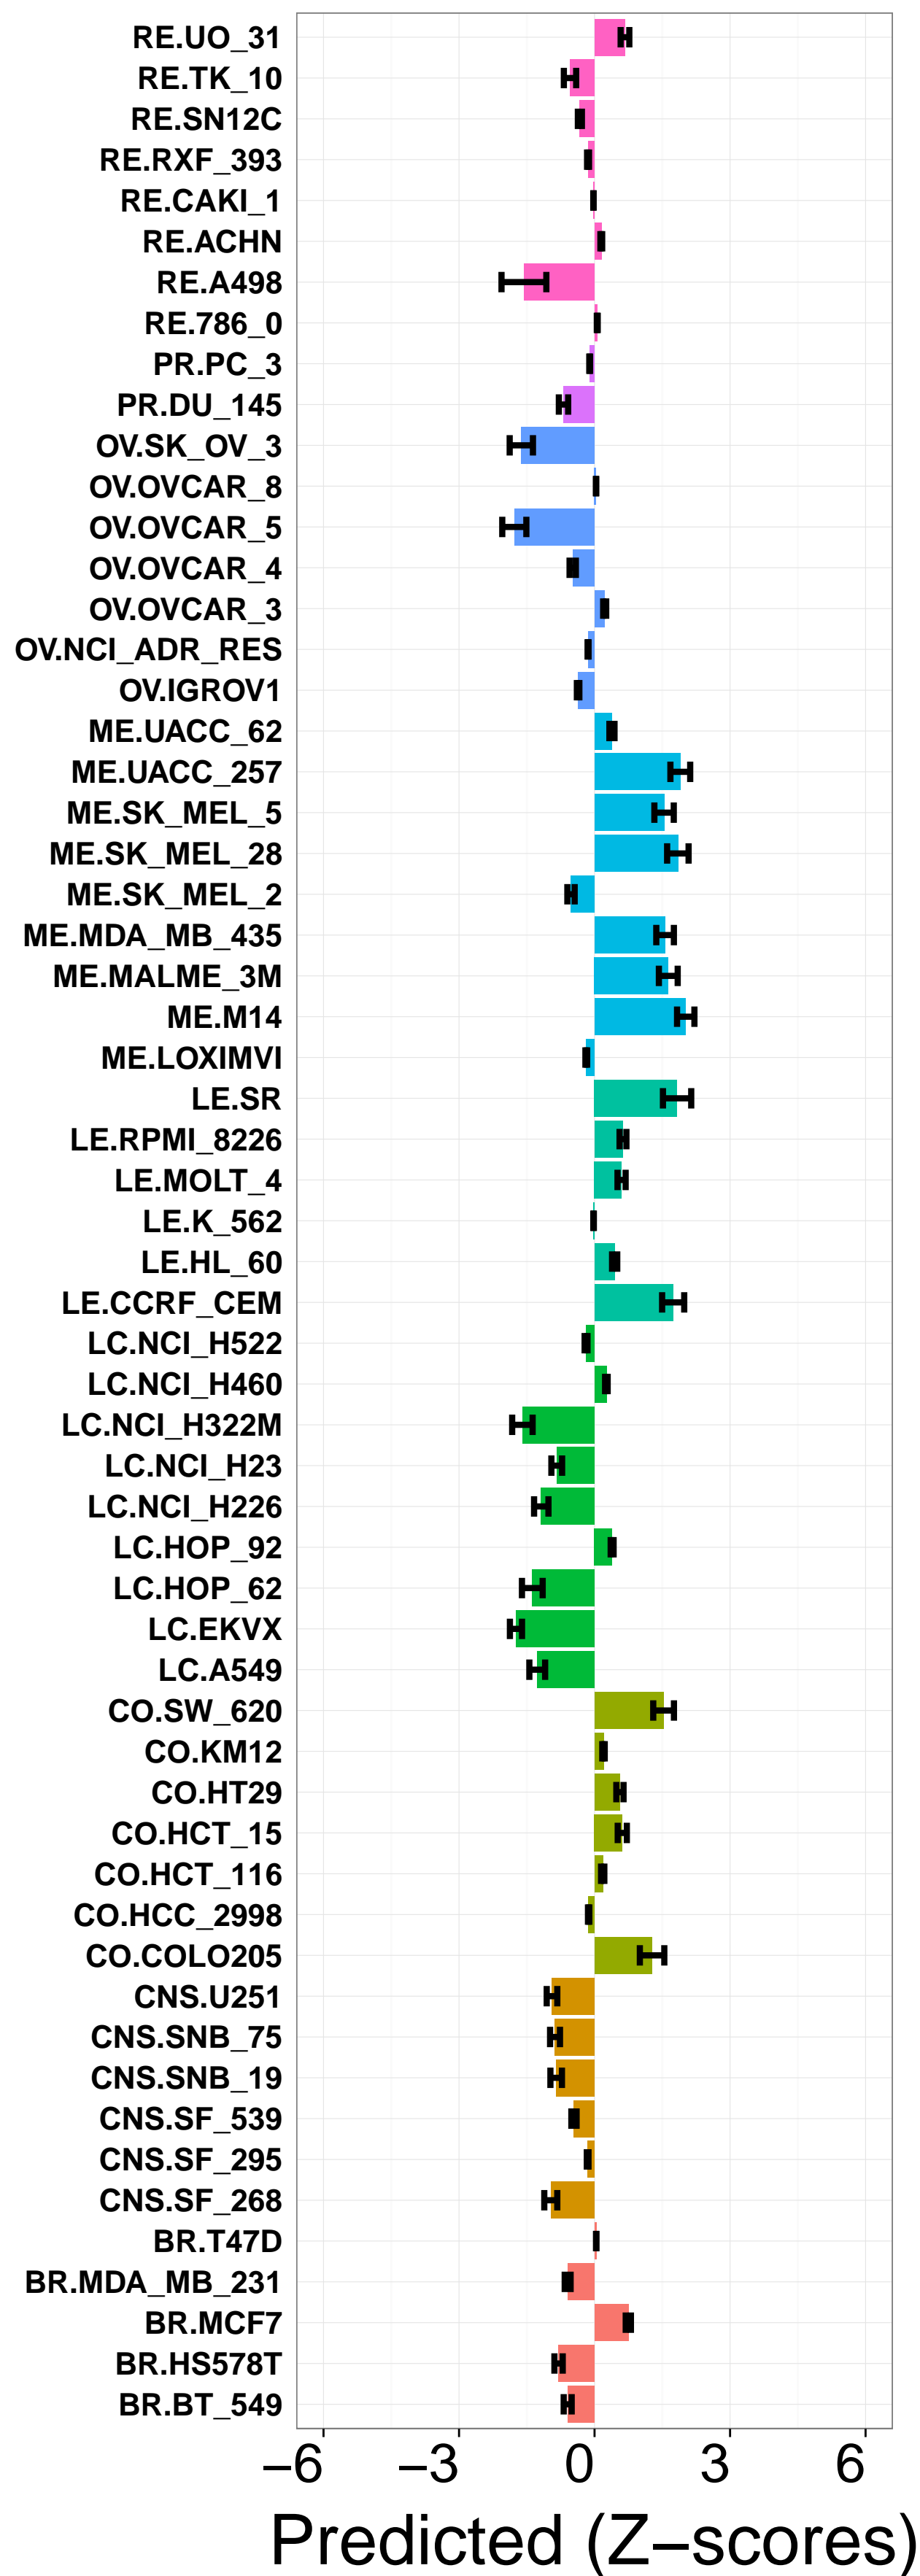

# NSC 376128, Dolastatin\_10 (Interpolation)

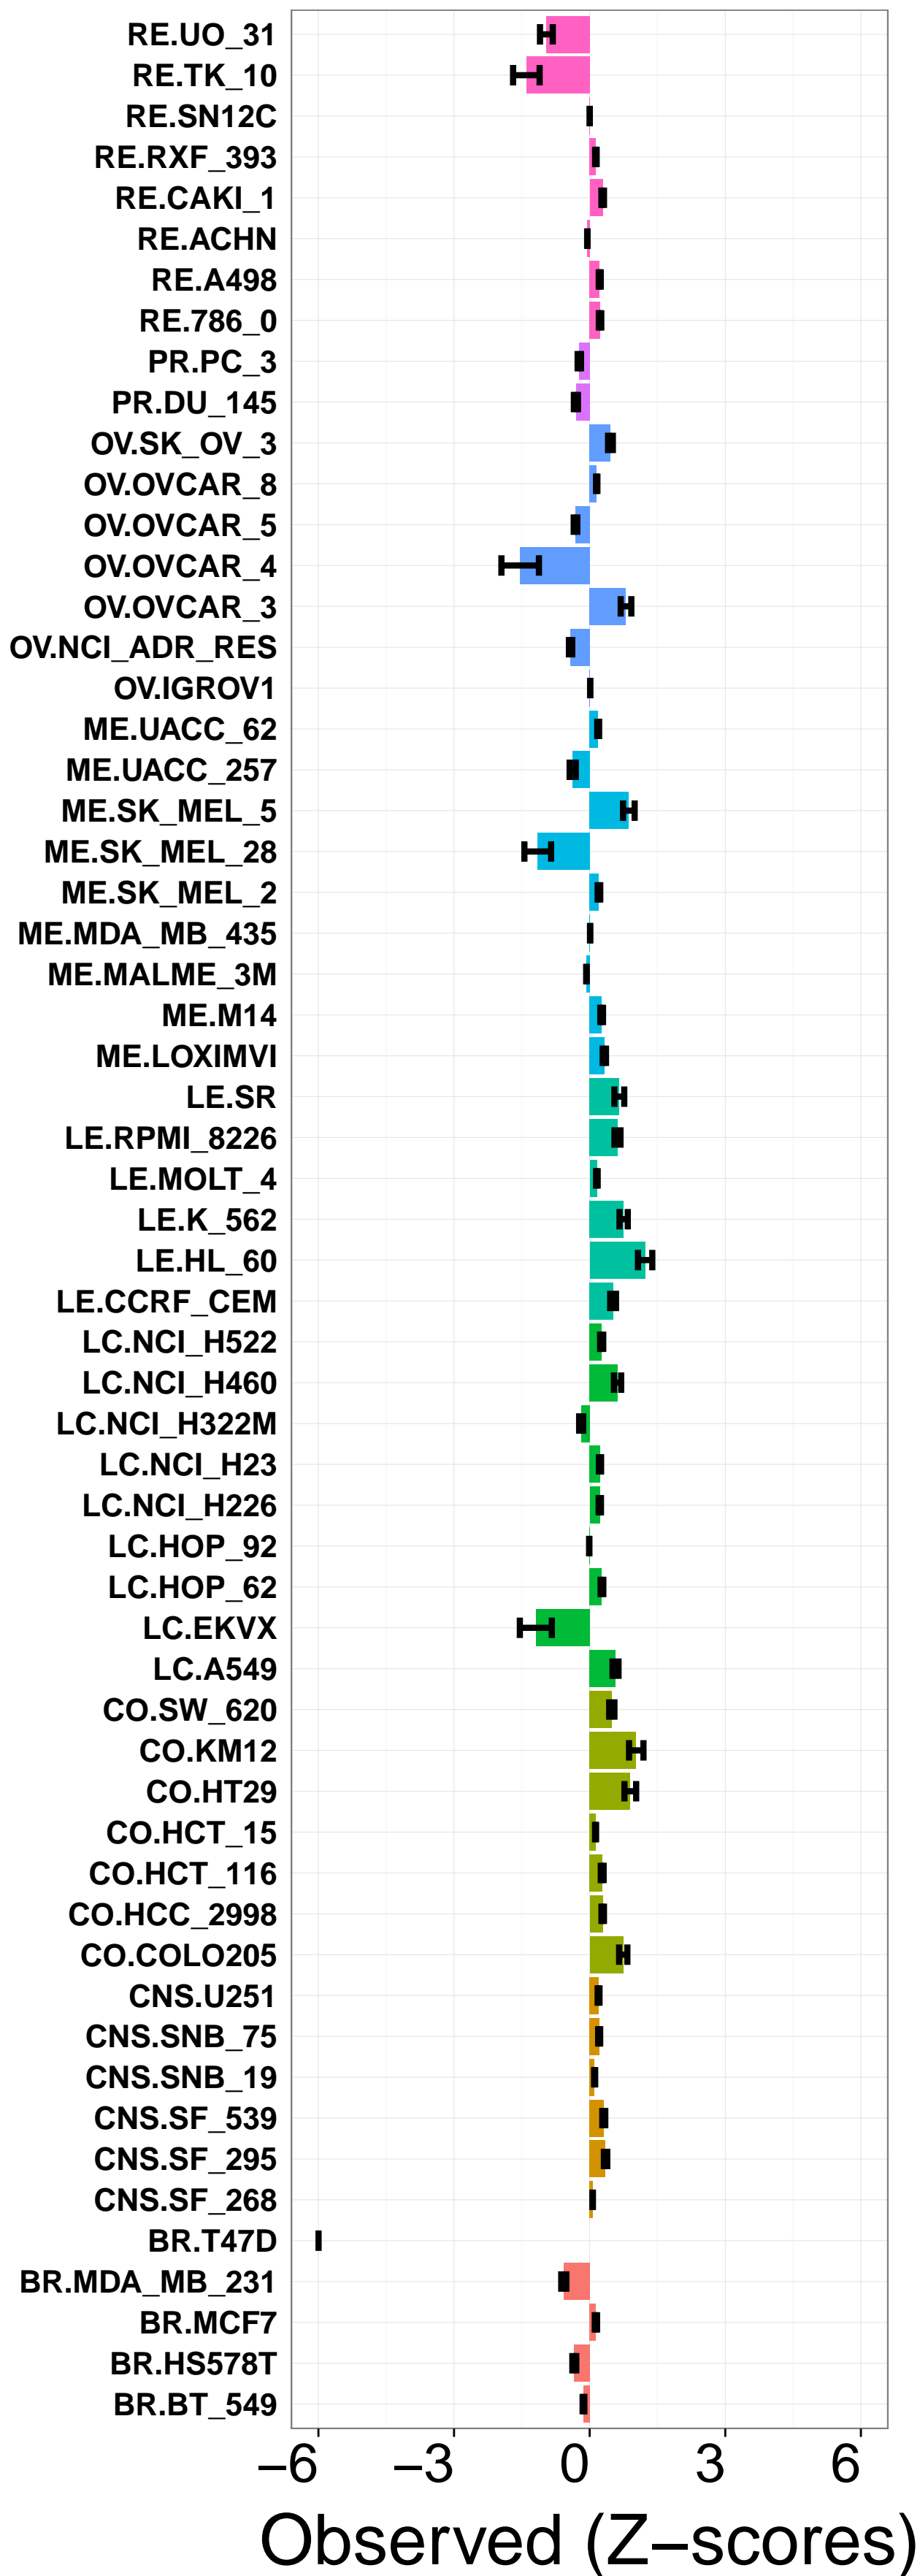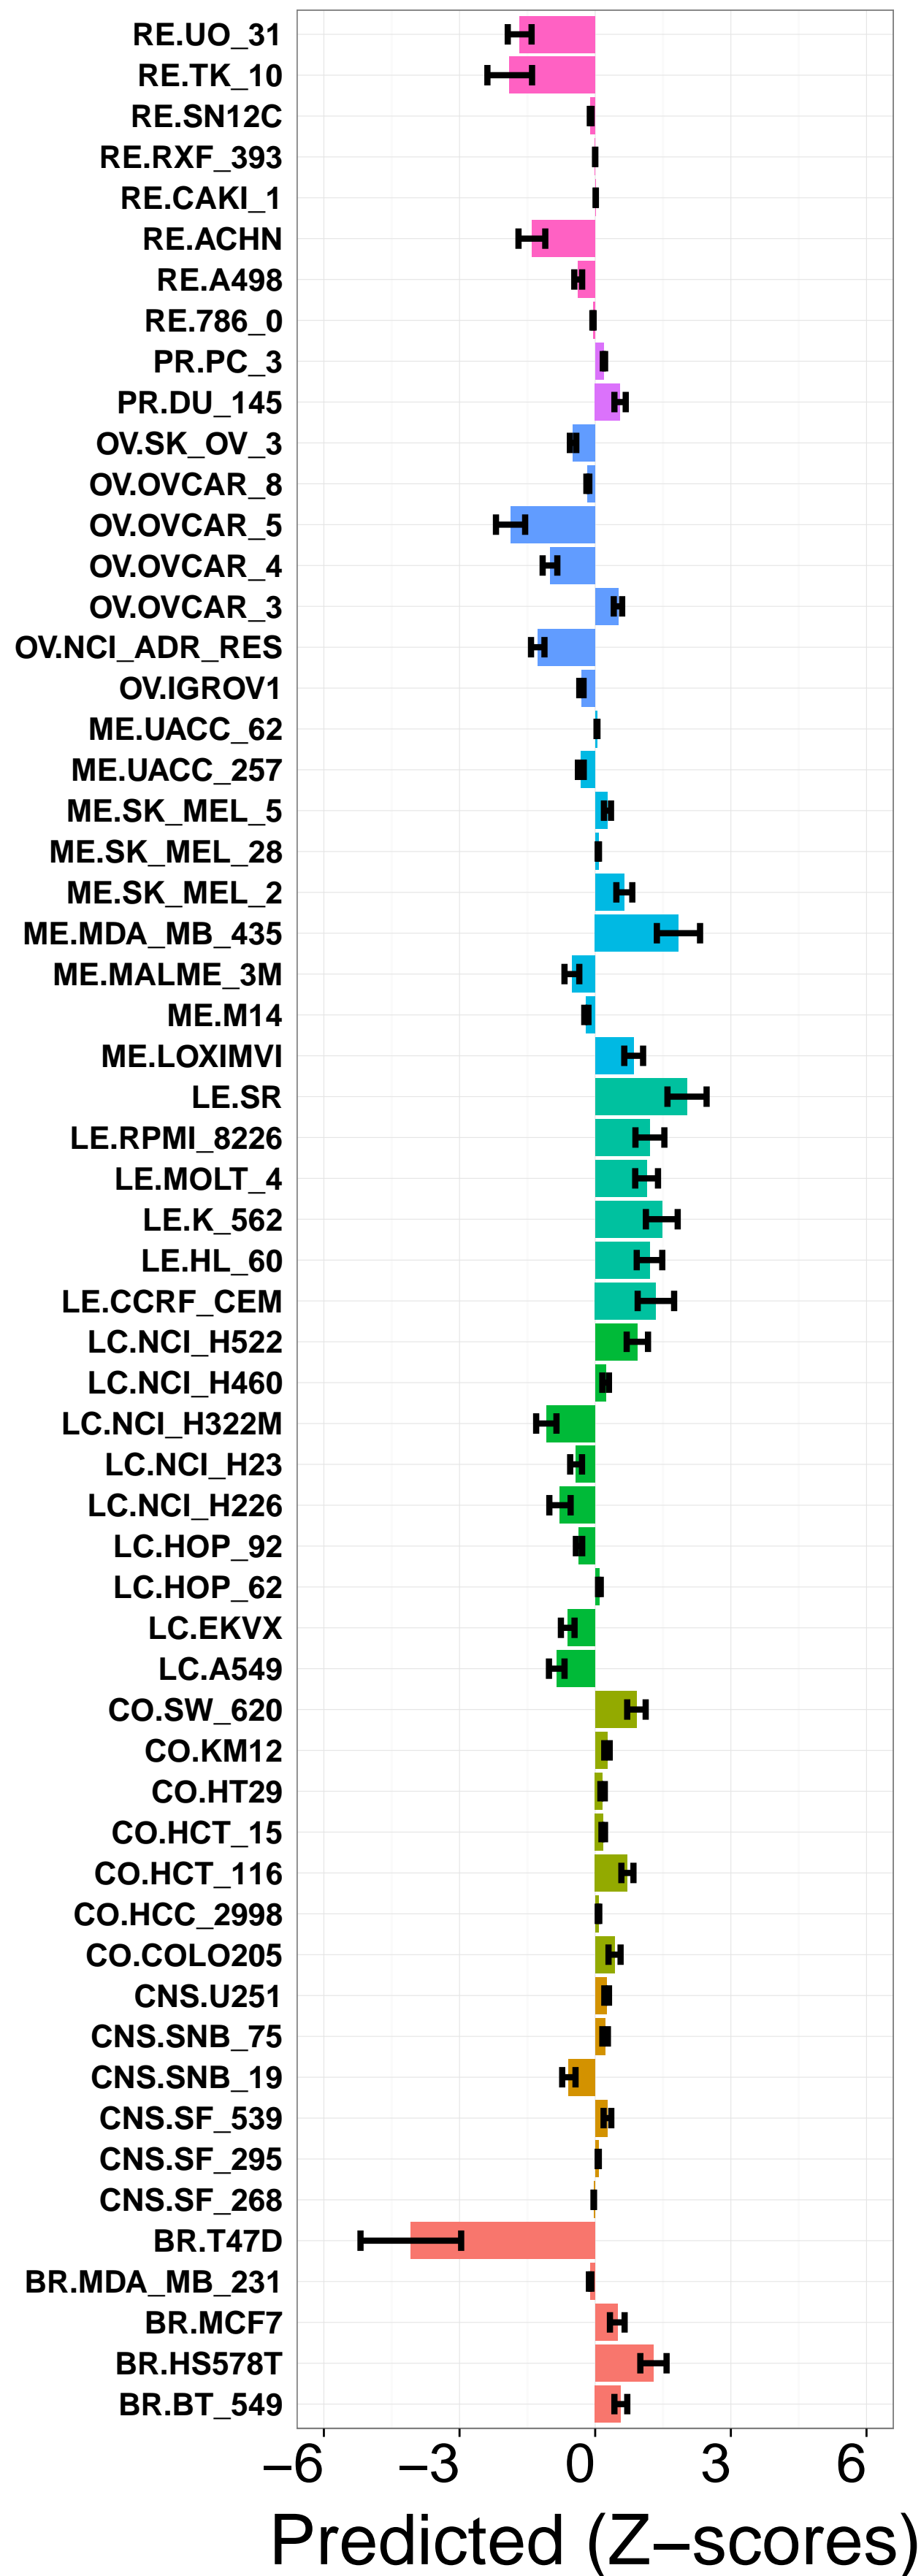

# NSC 606869, (Interpolation)

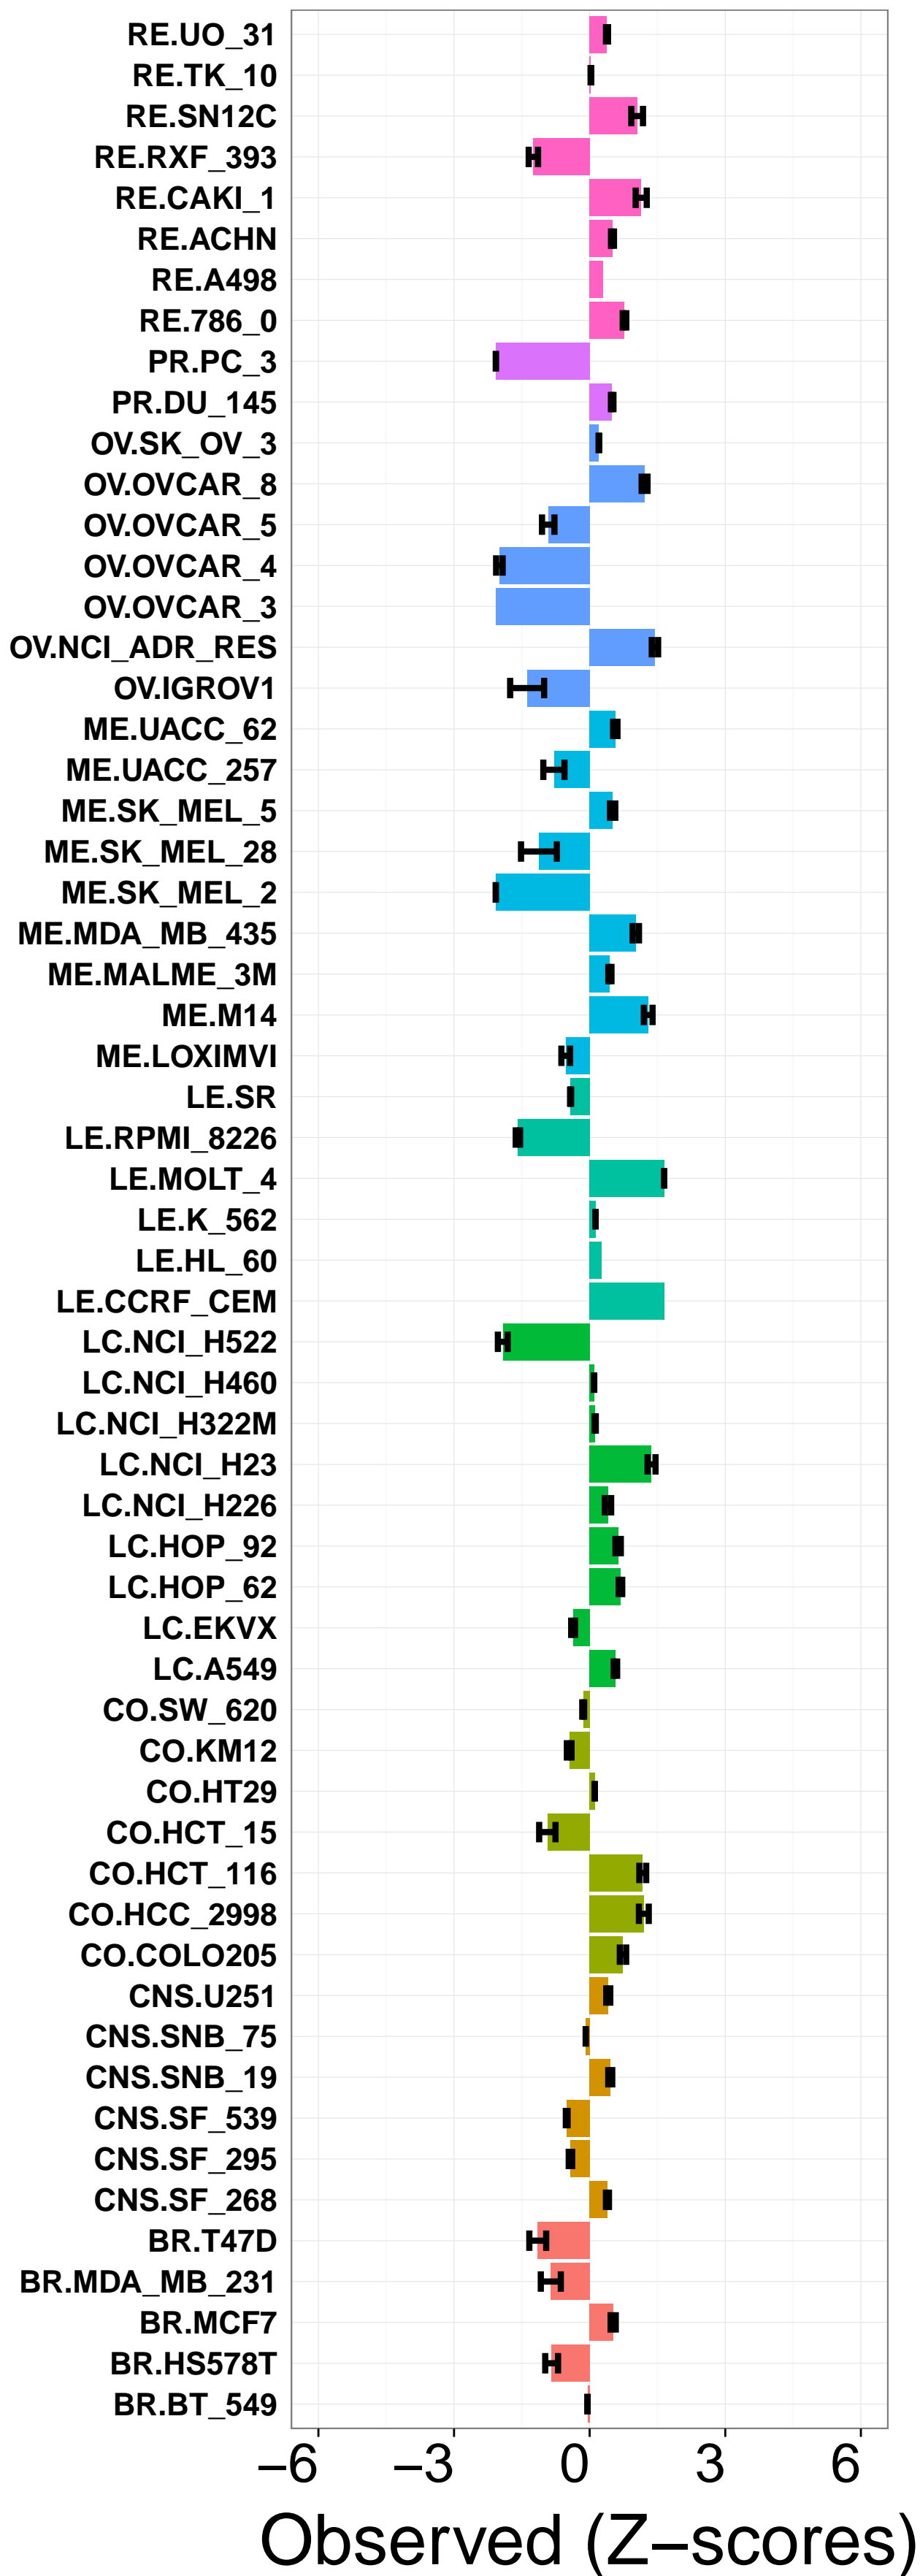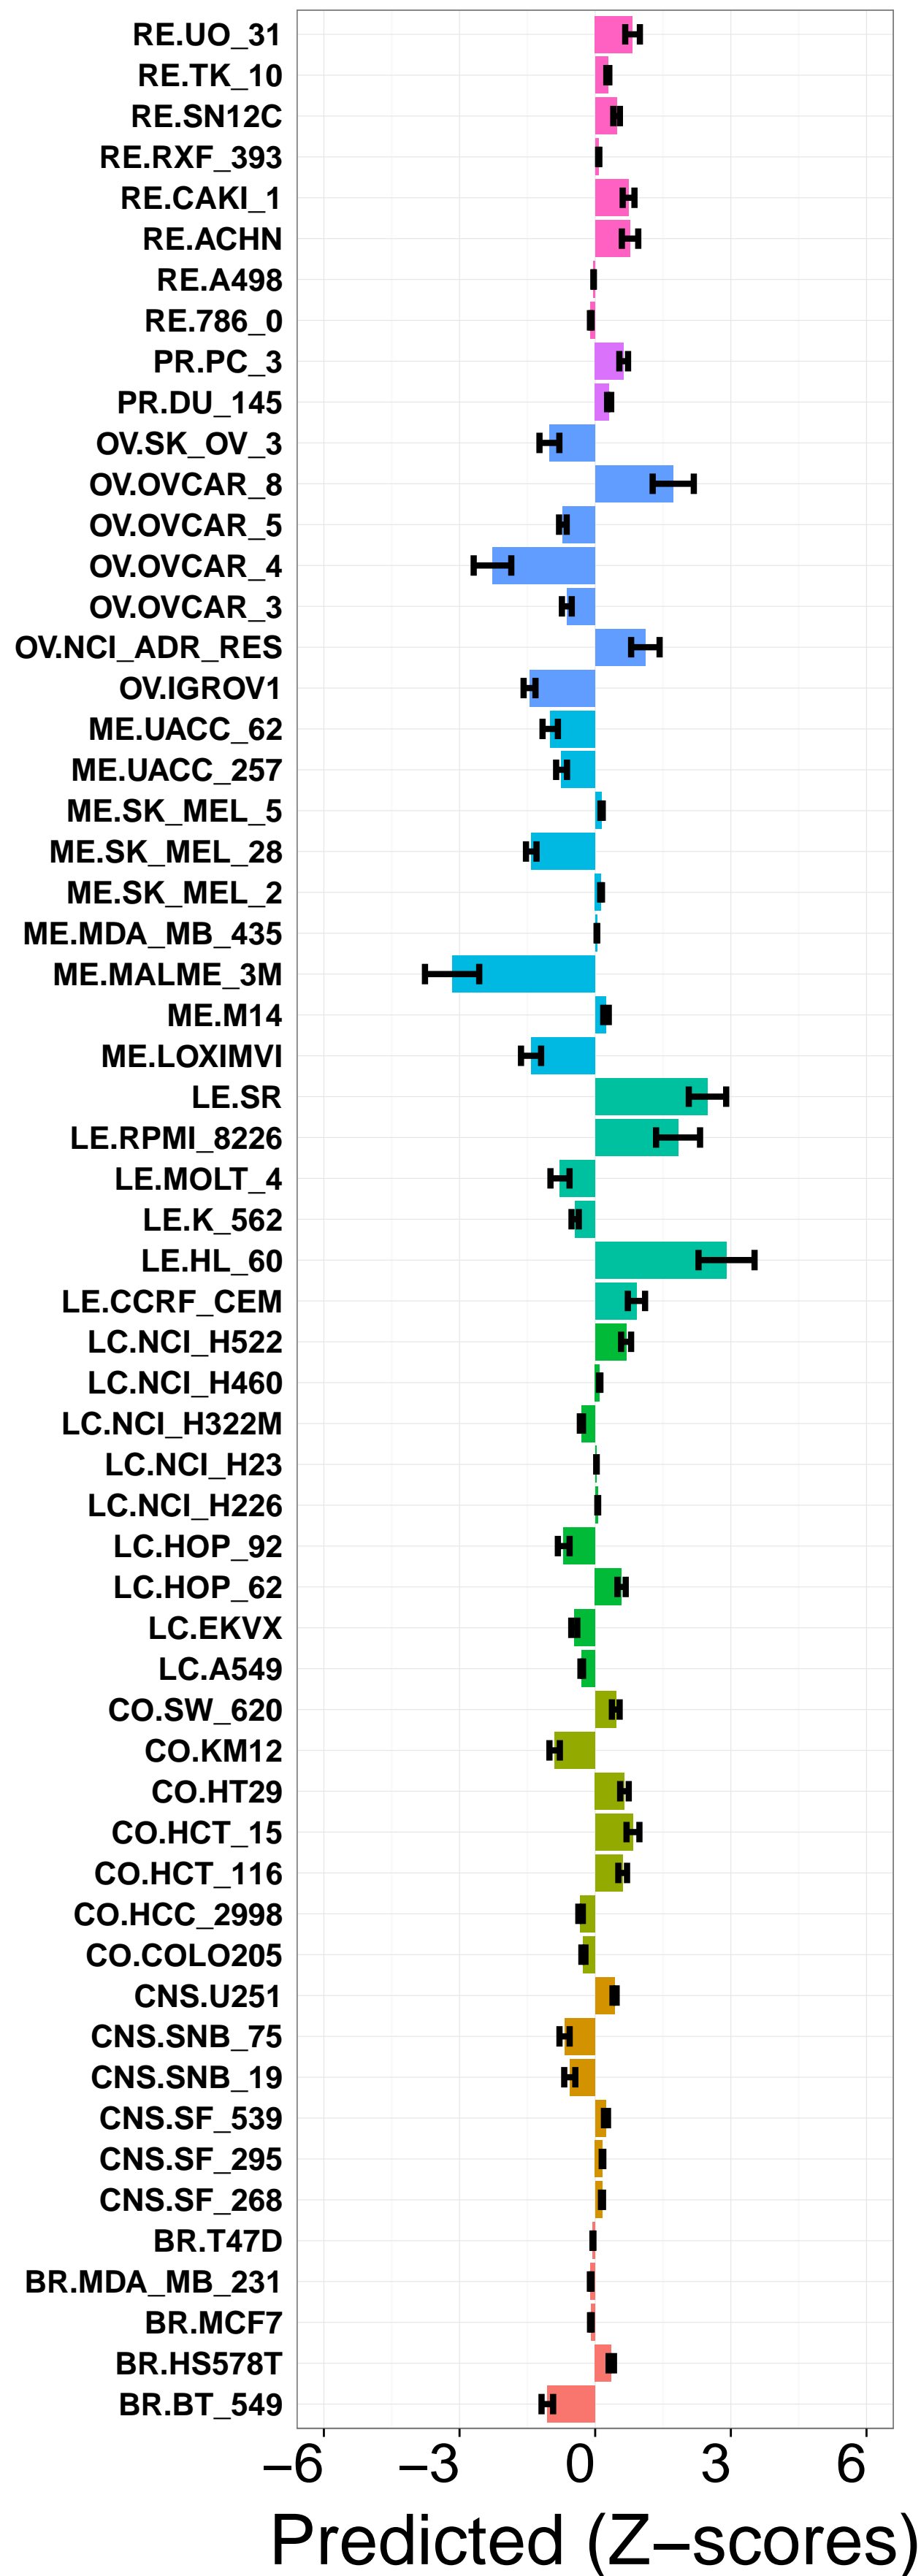



# NSC 609699, Topotecan\_Hydrochloride (Interpolation)

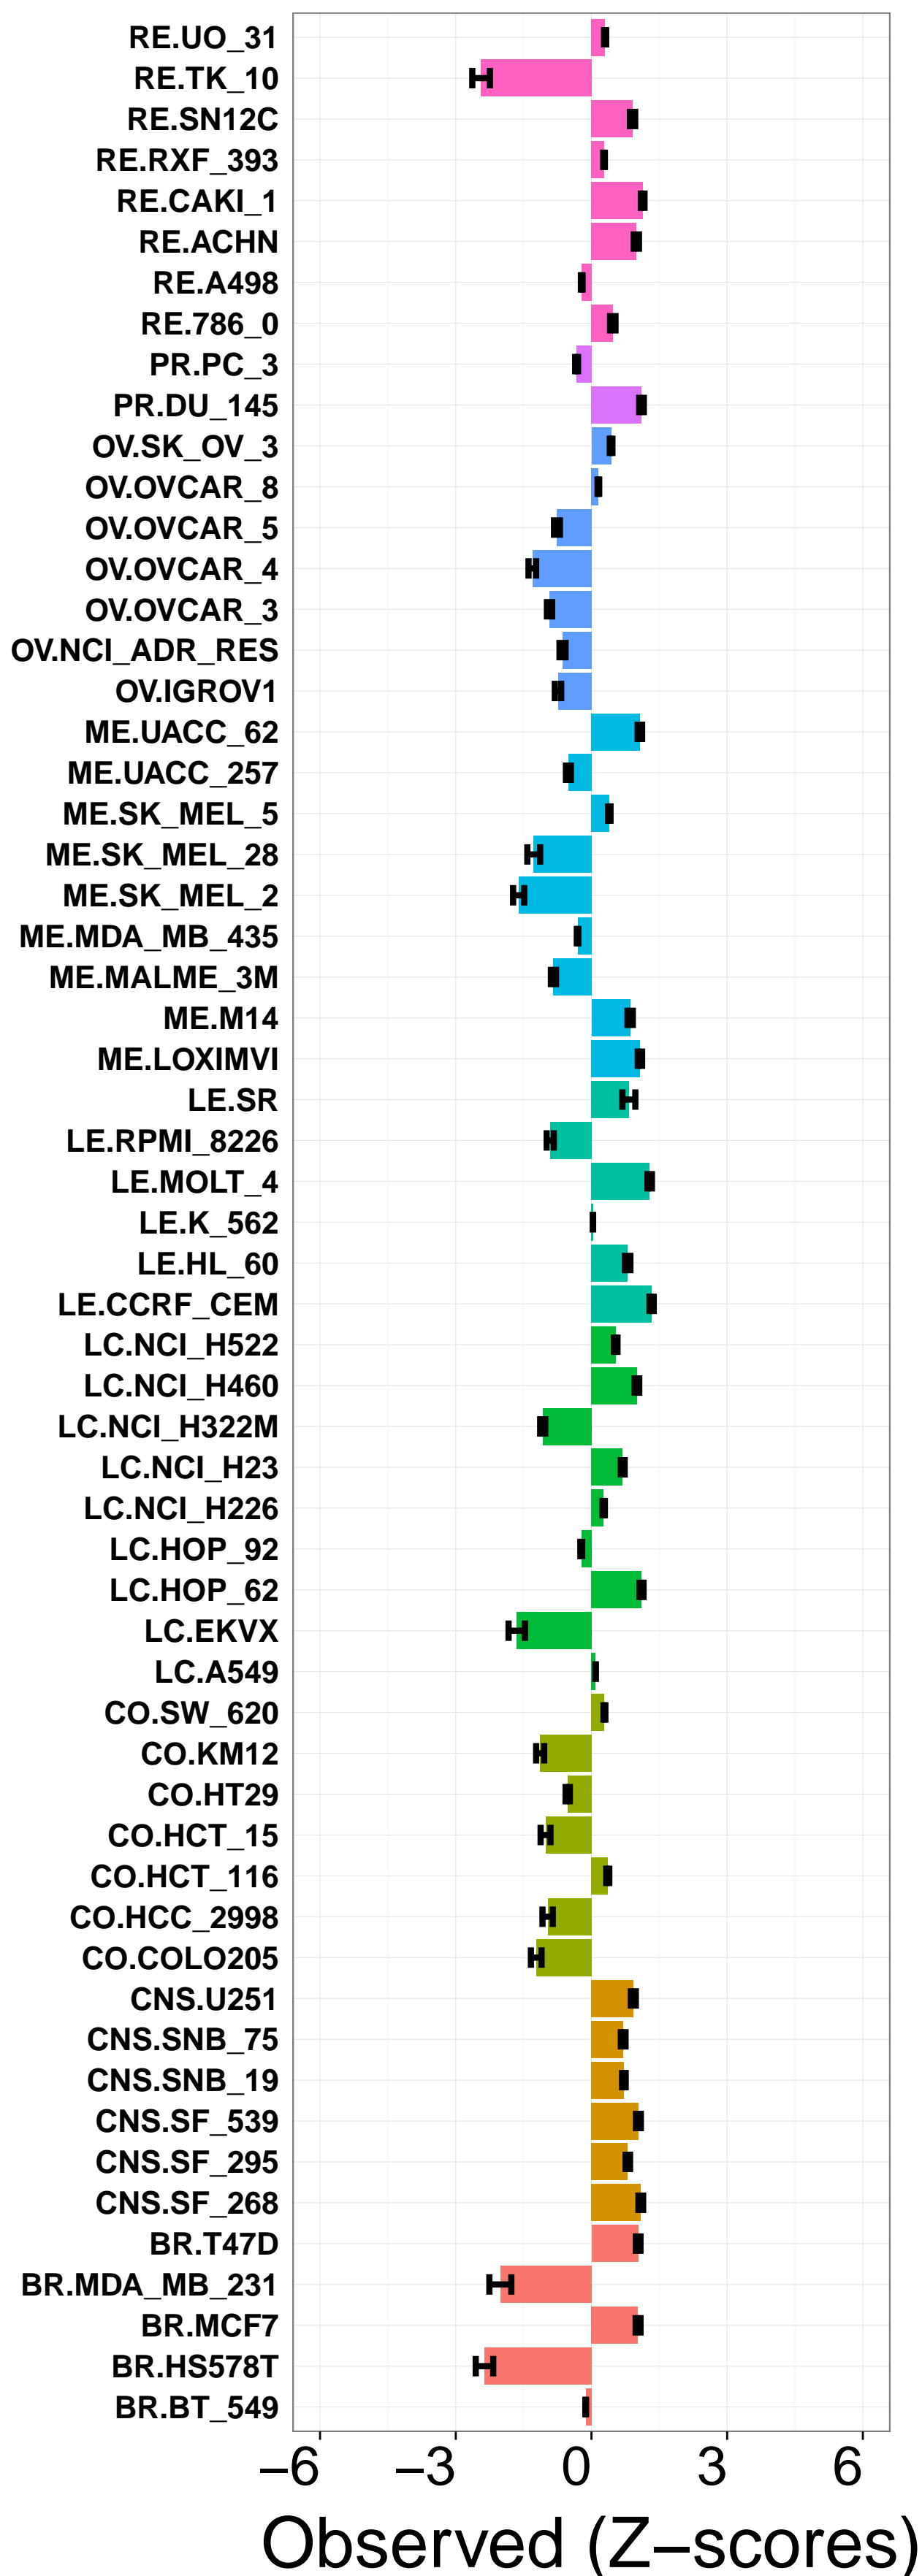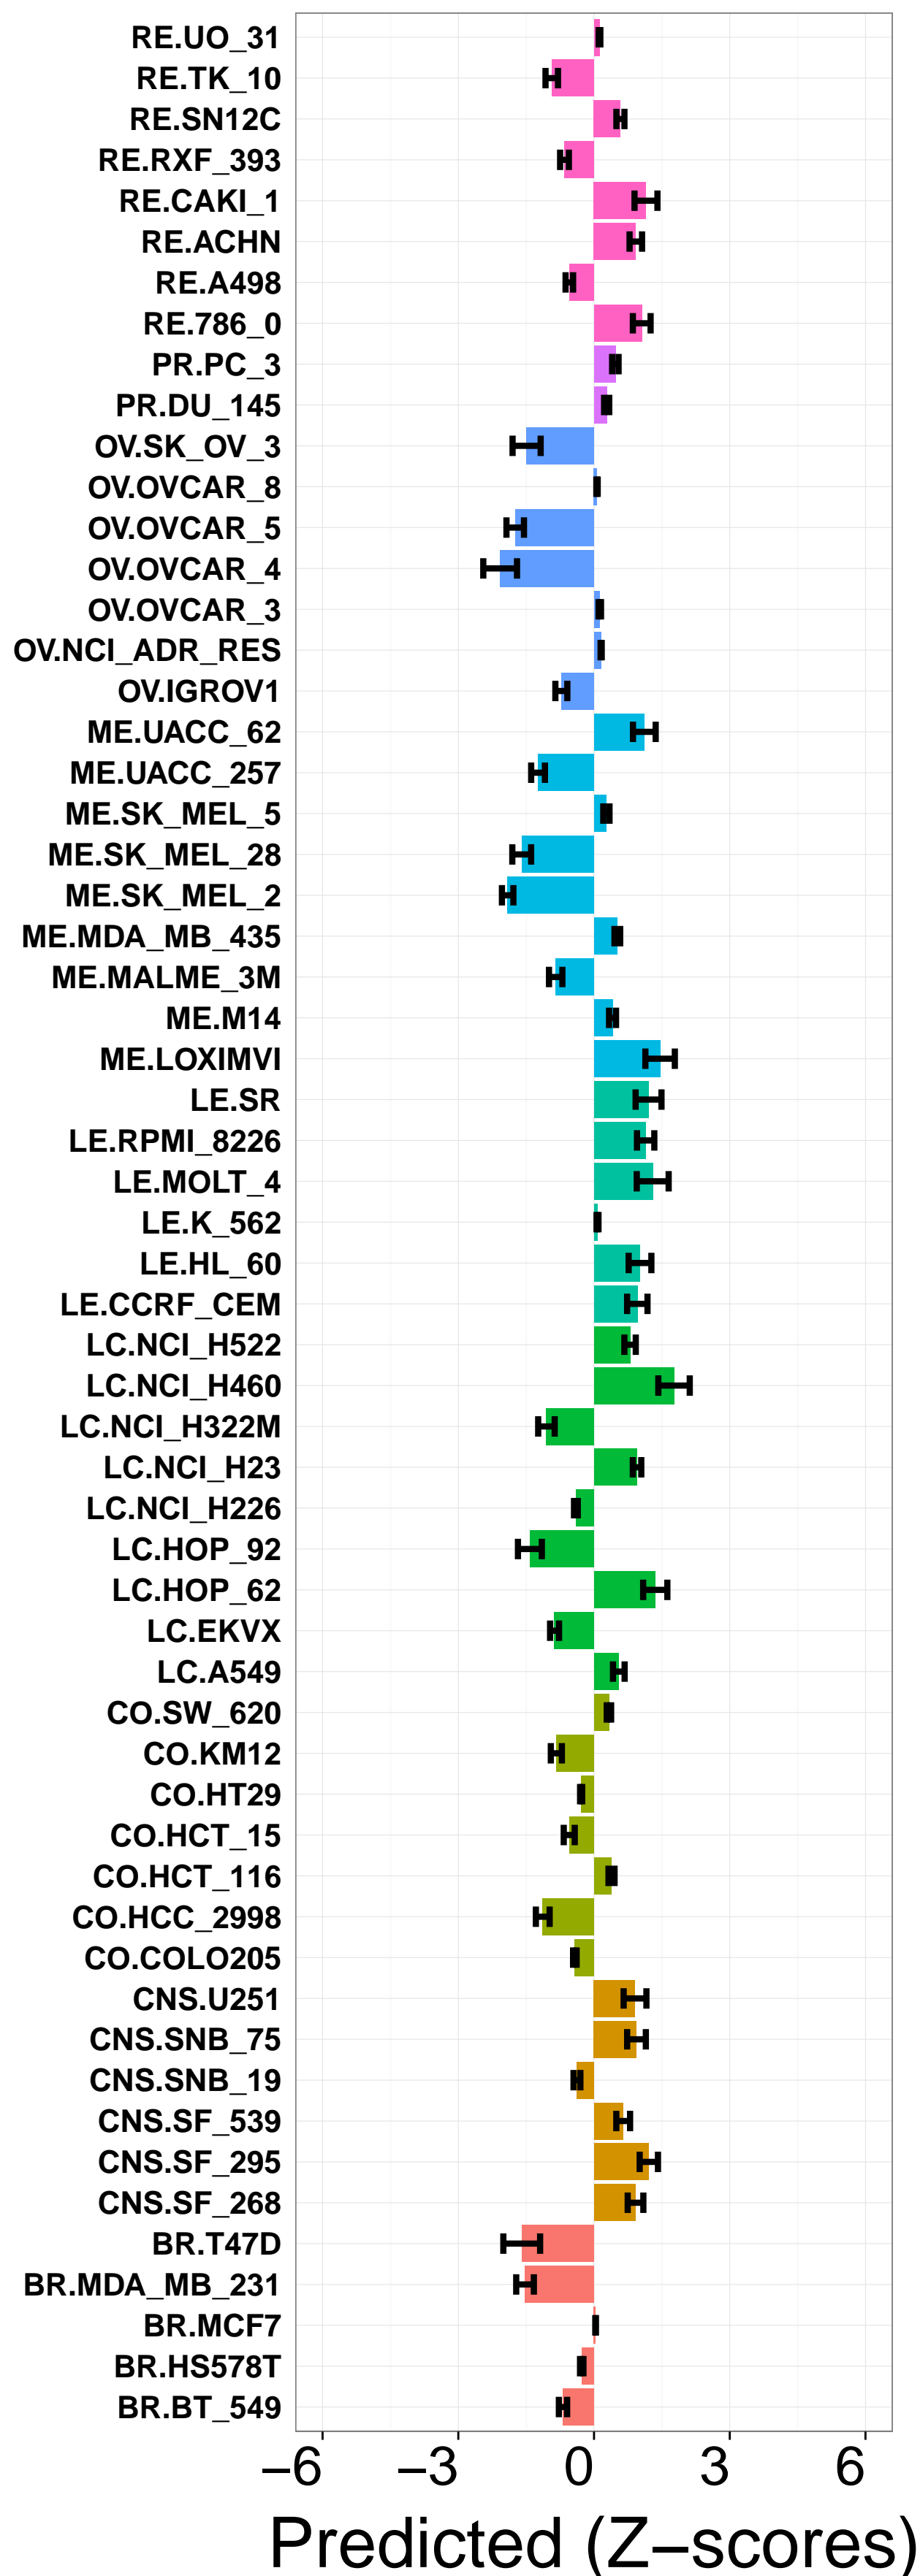

# NSC 613327, (Interpolation)

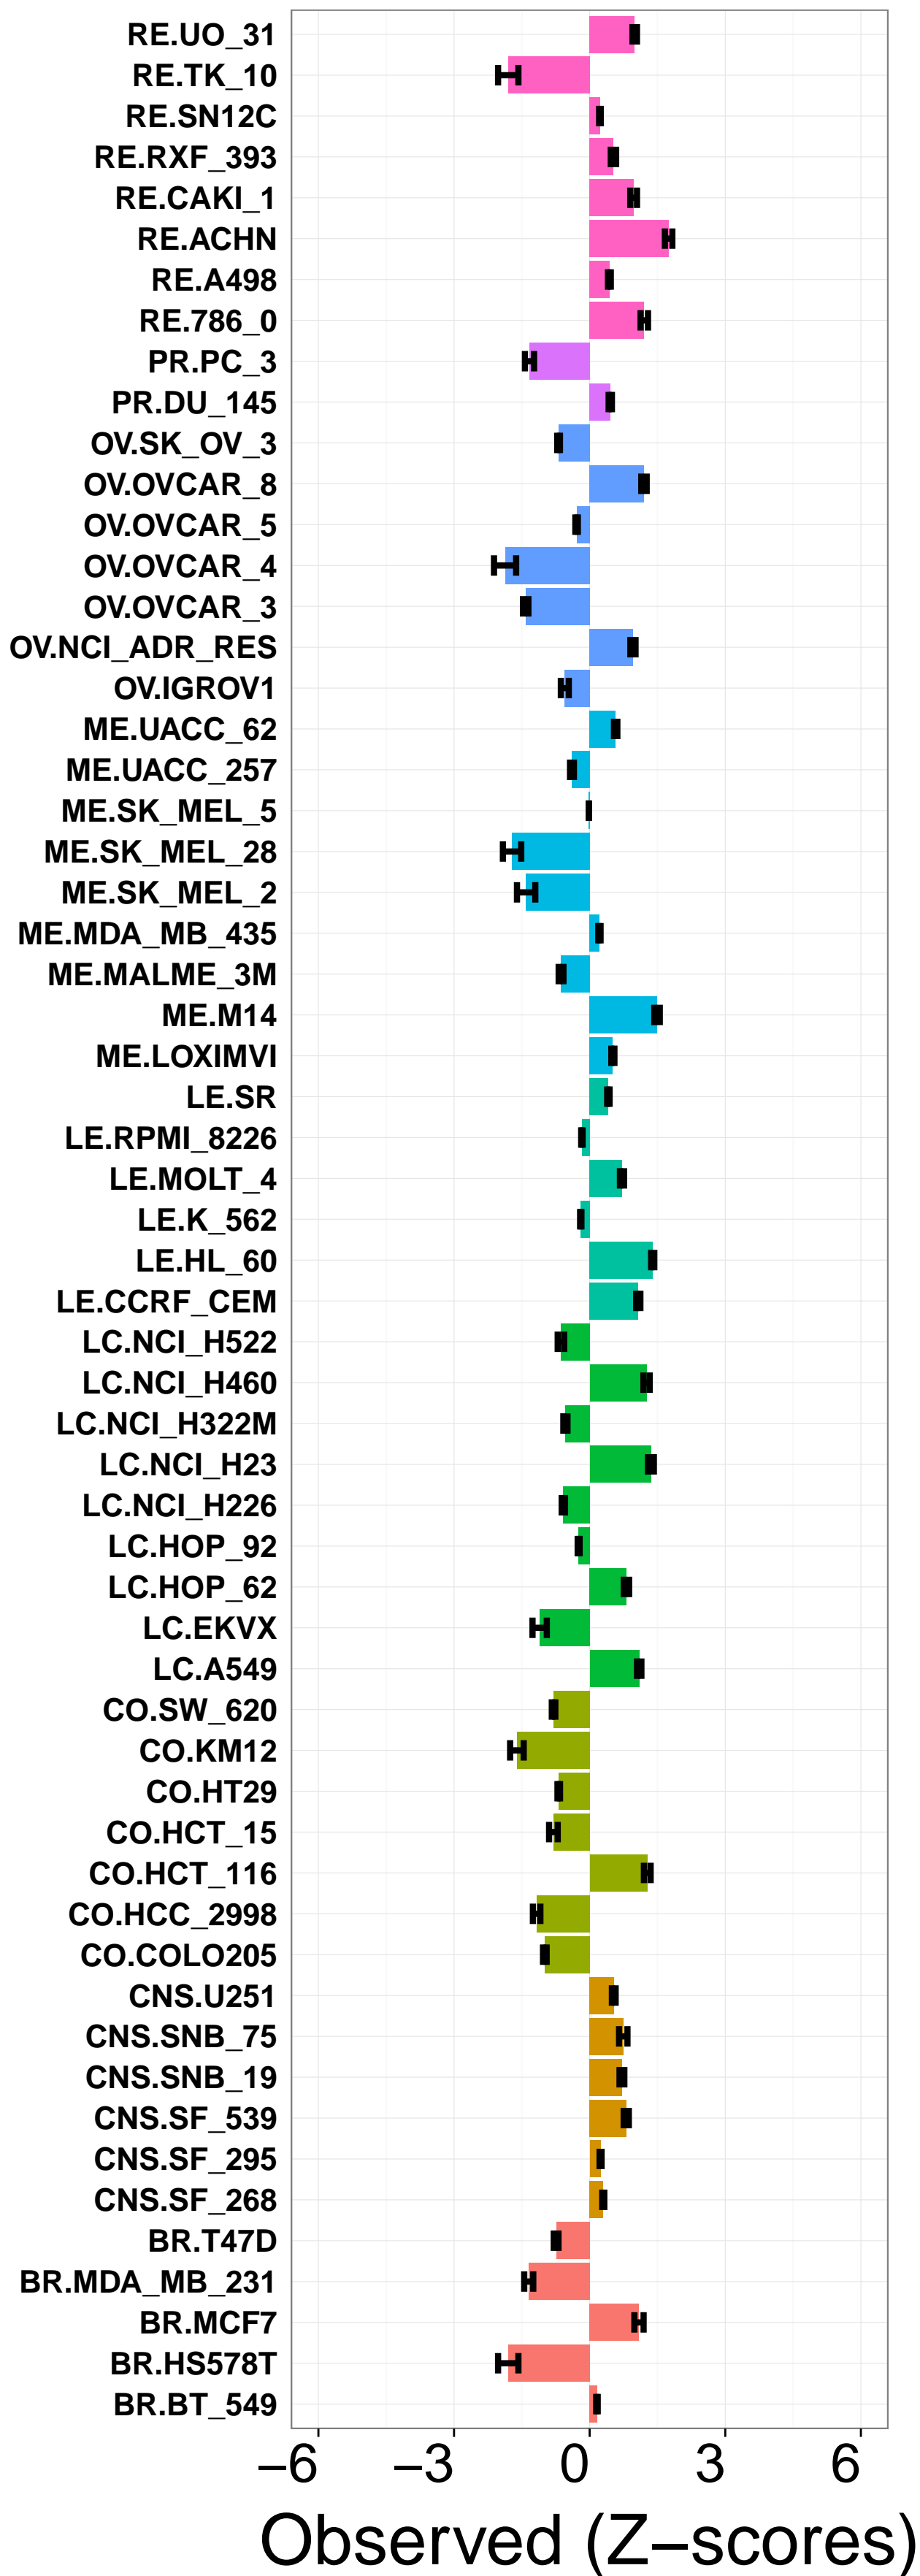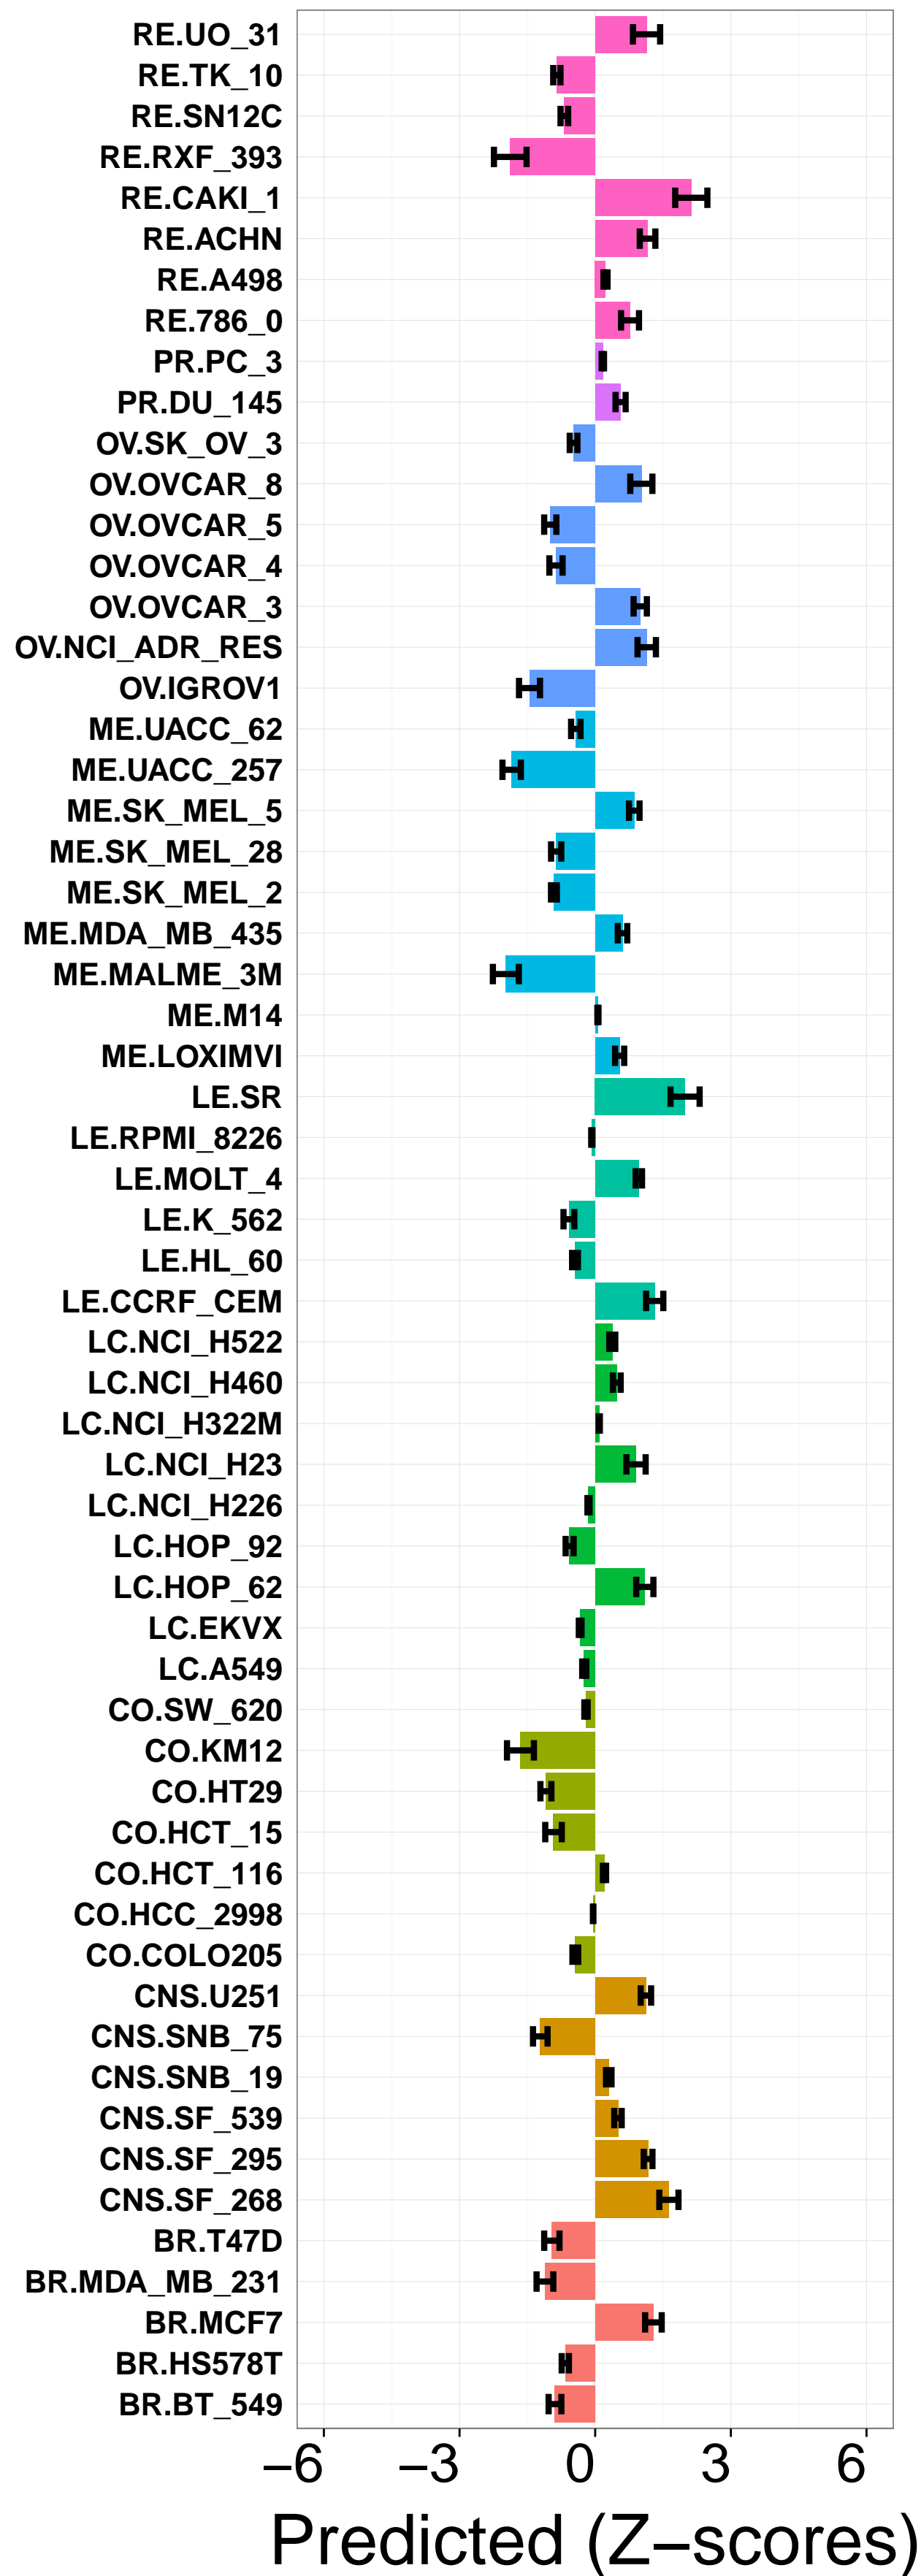

# NSC 628503, Docetaxel (Interpolation)

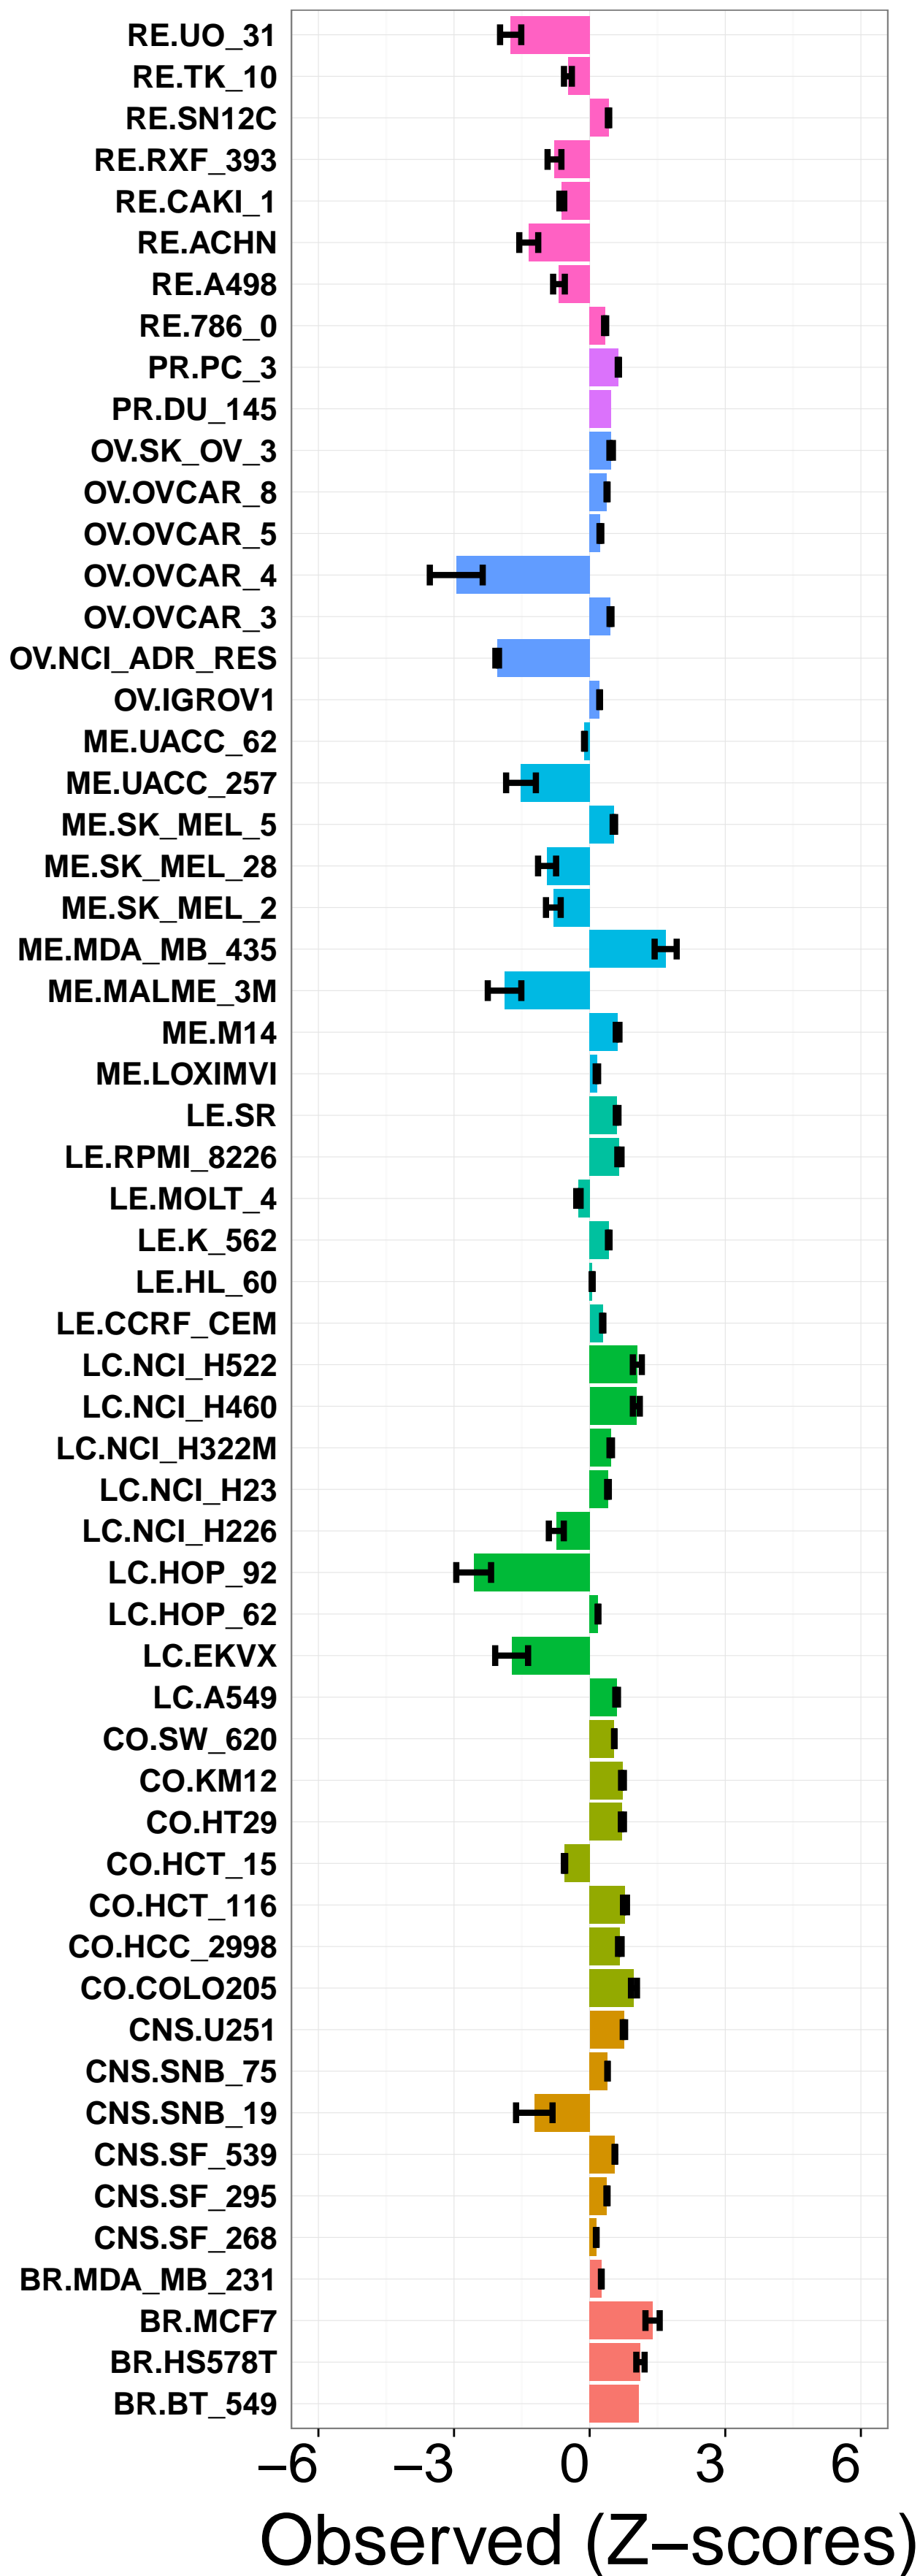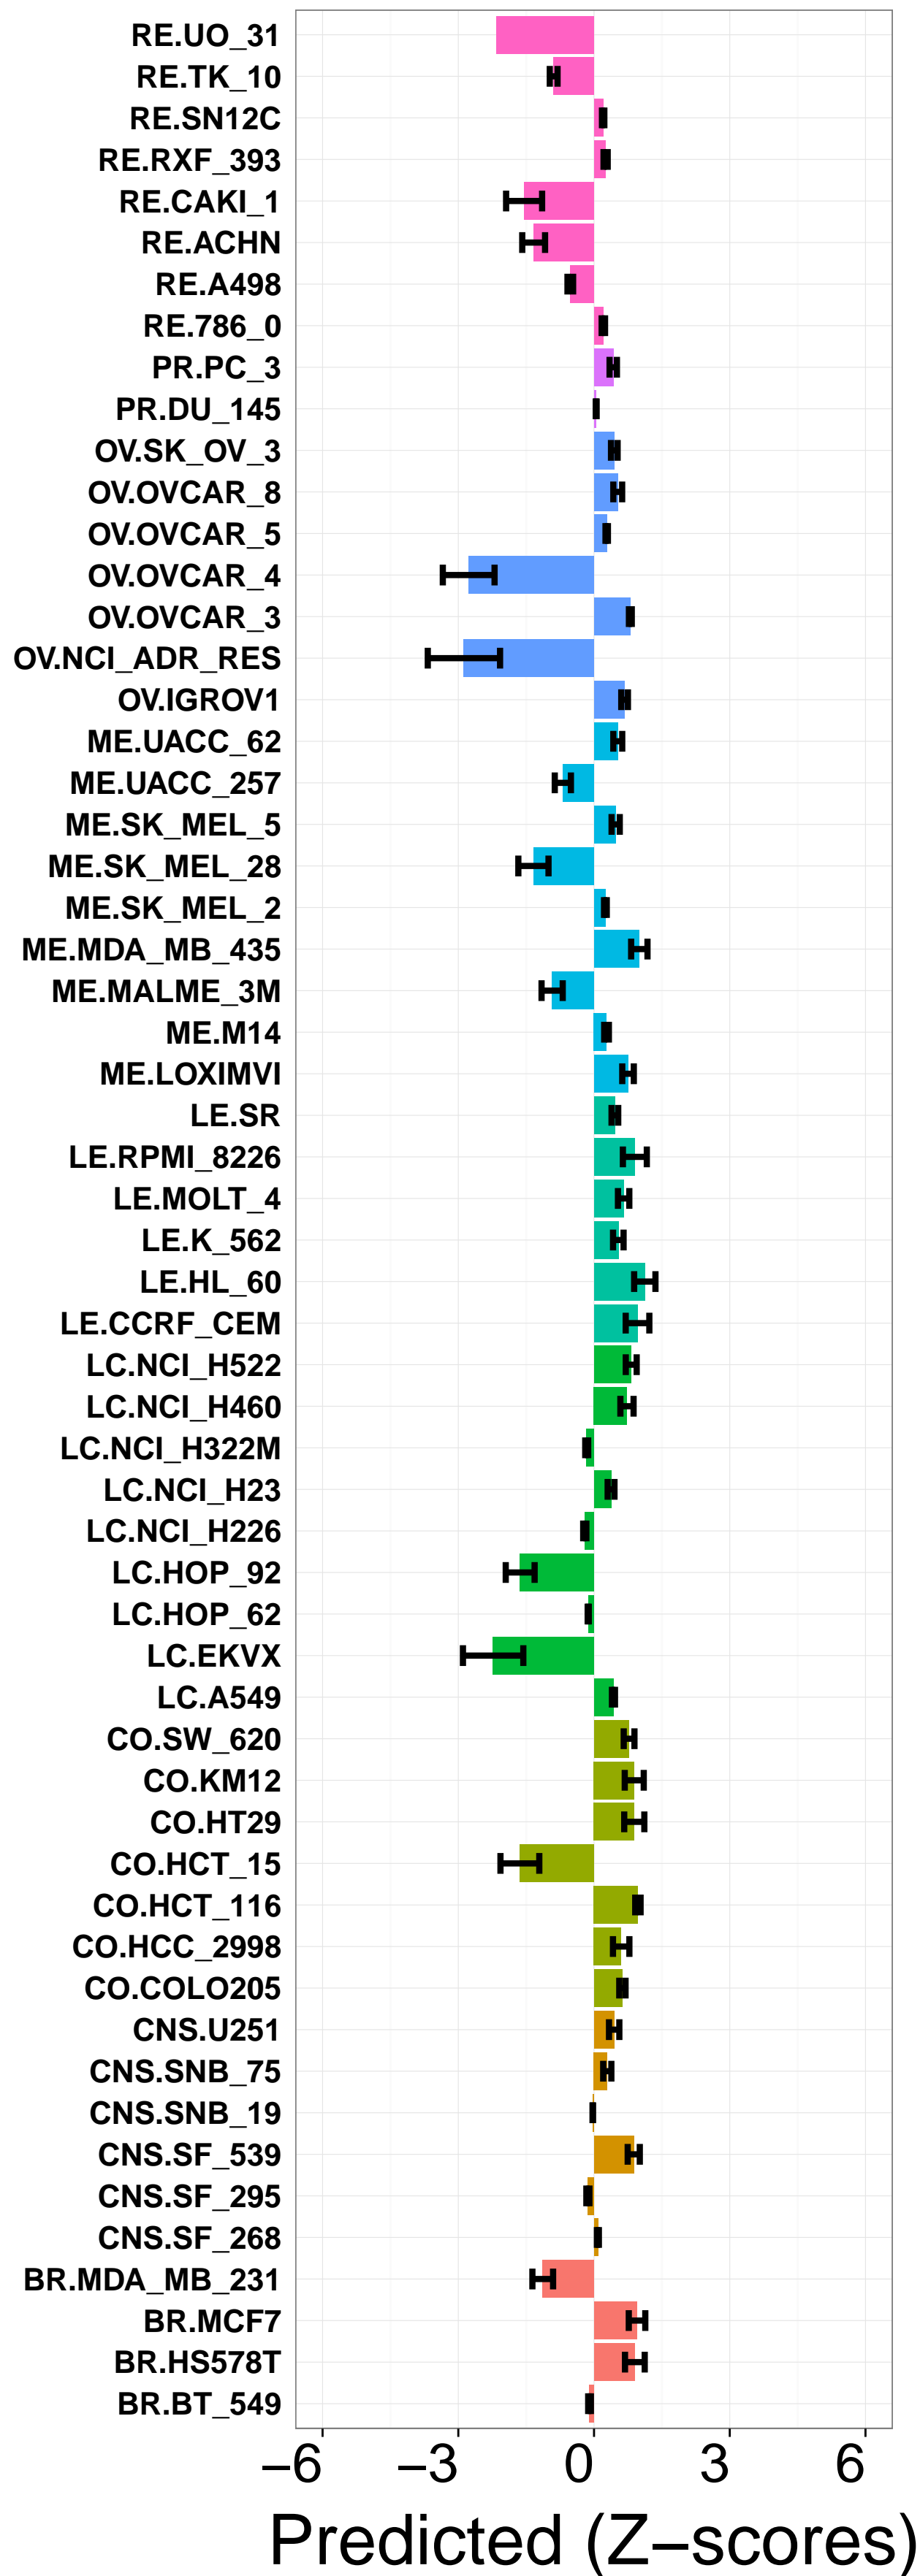

# NSC 630176, Romidepsin (Interpolation)

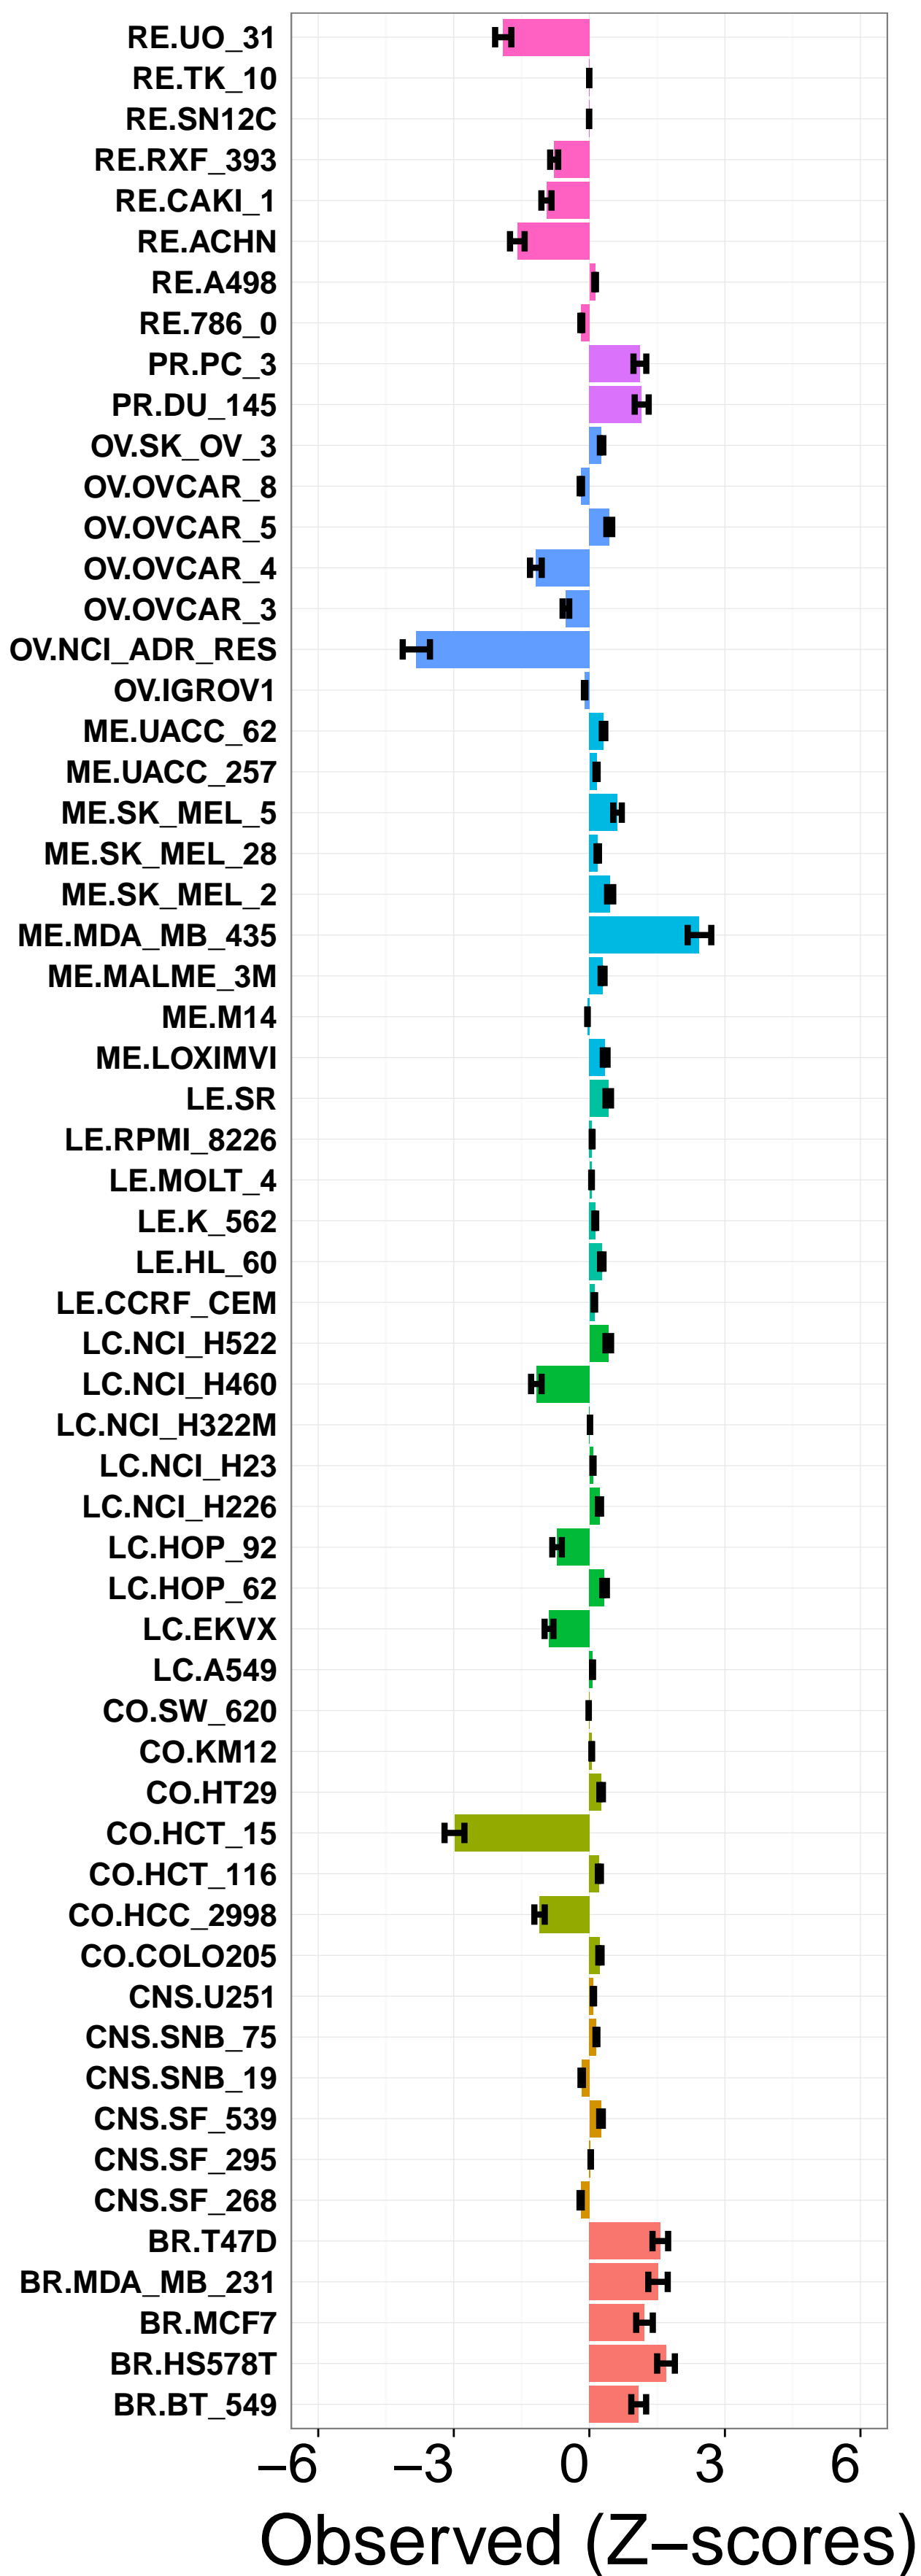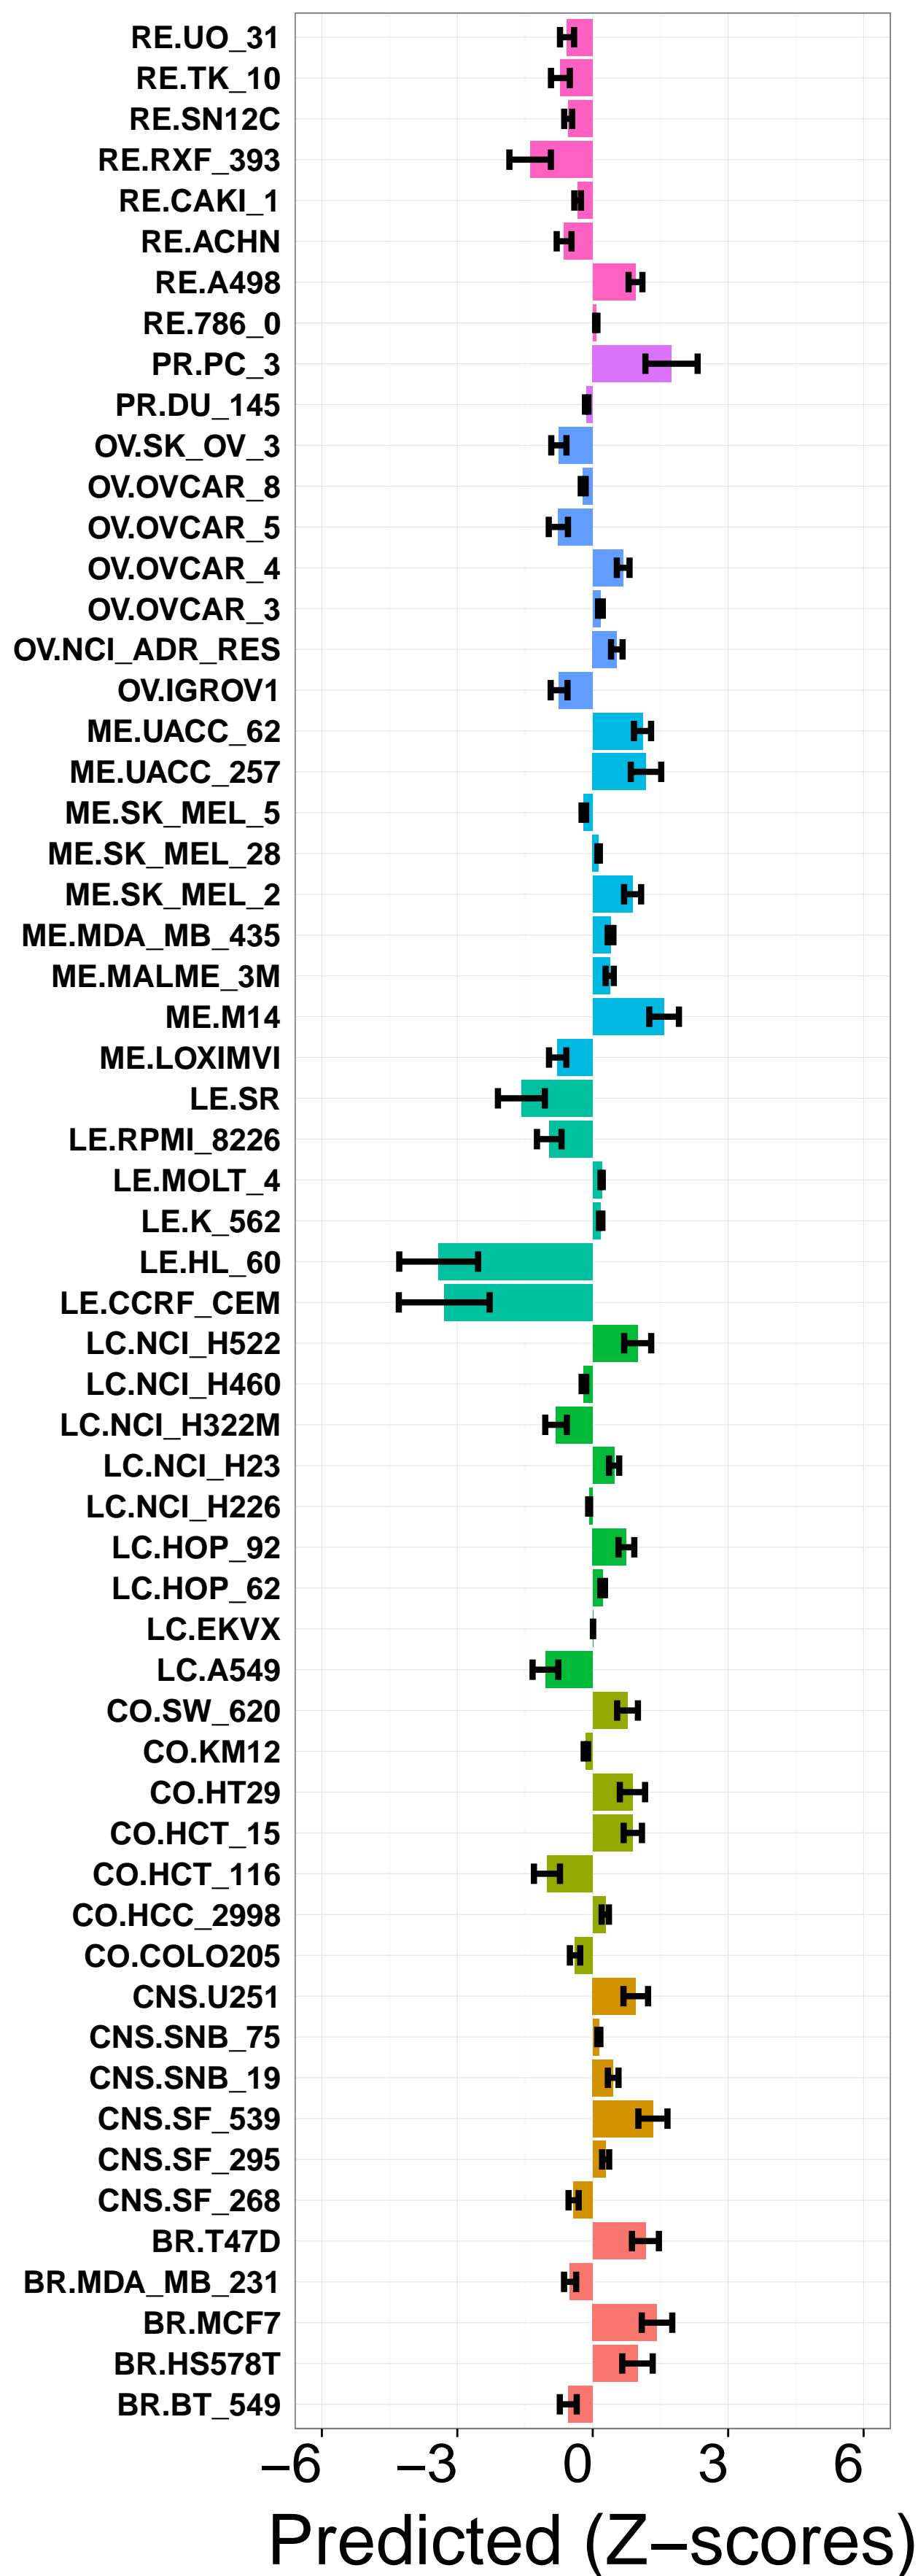

# NSC 633782, (Interpolation)

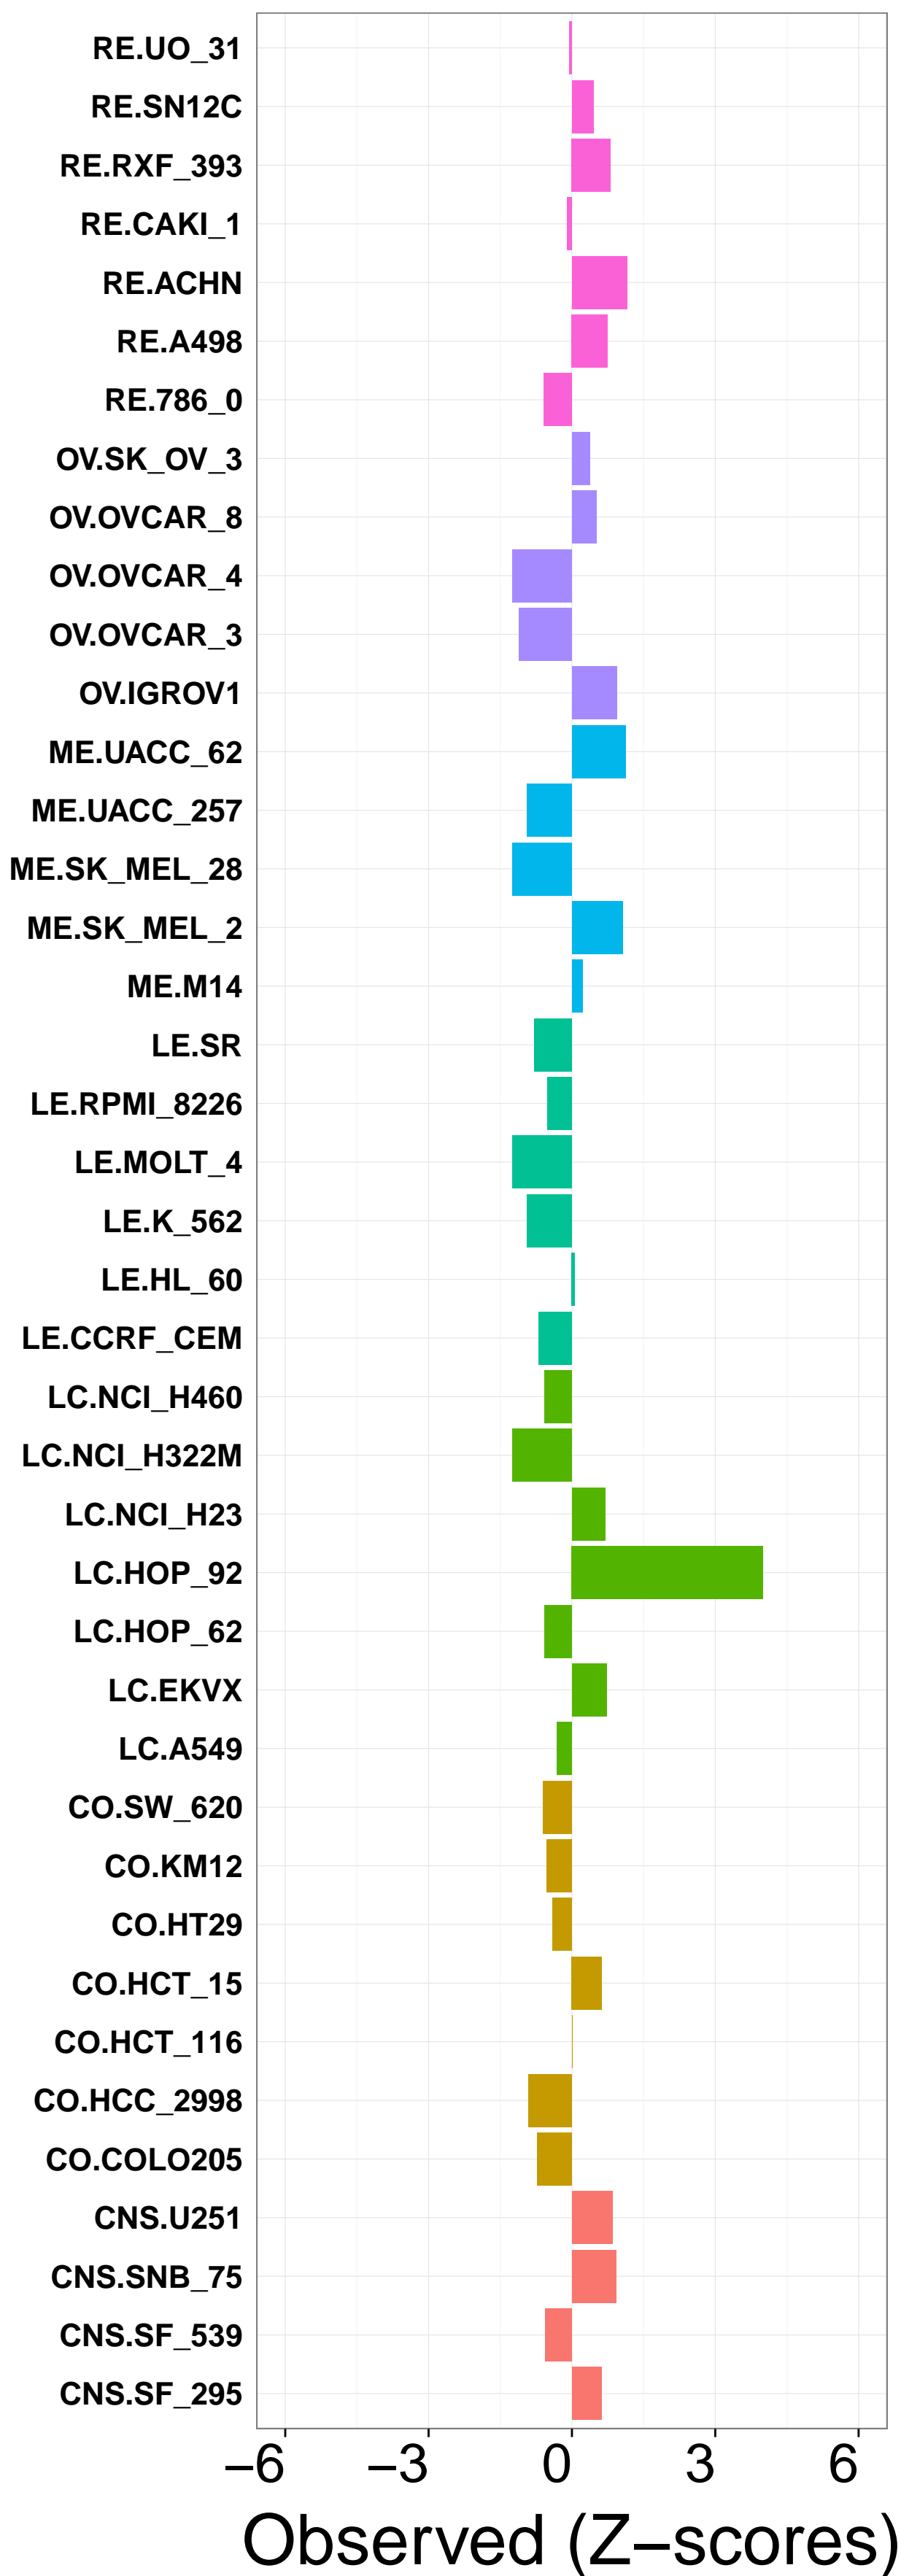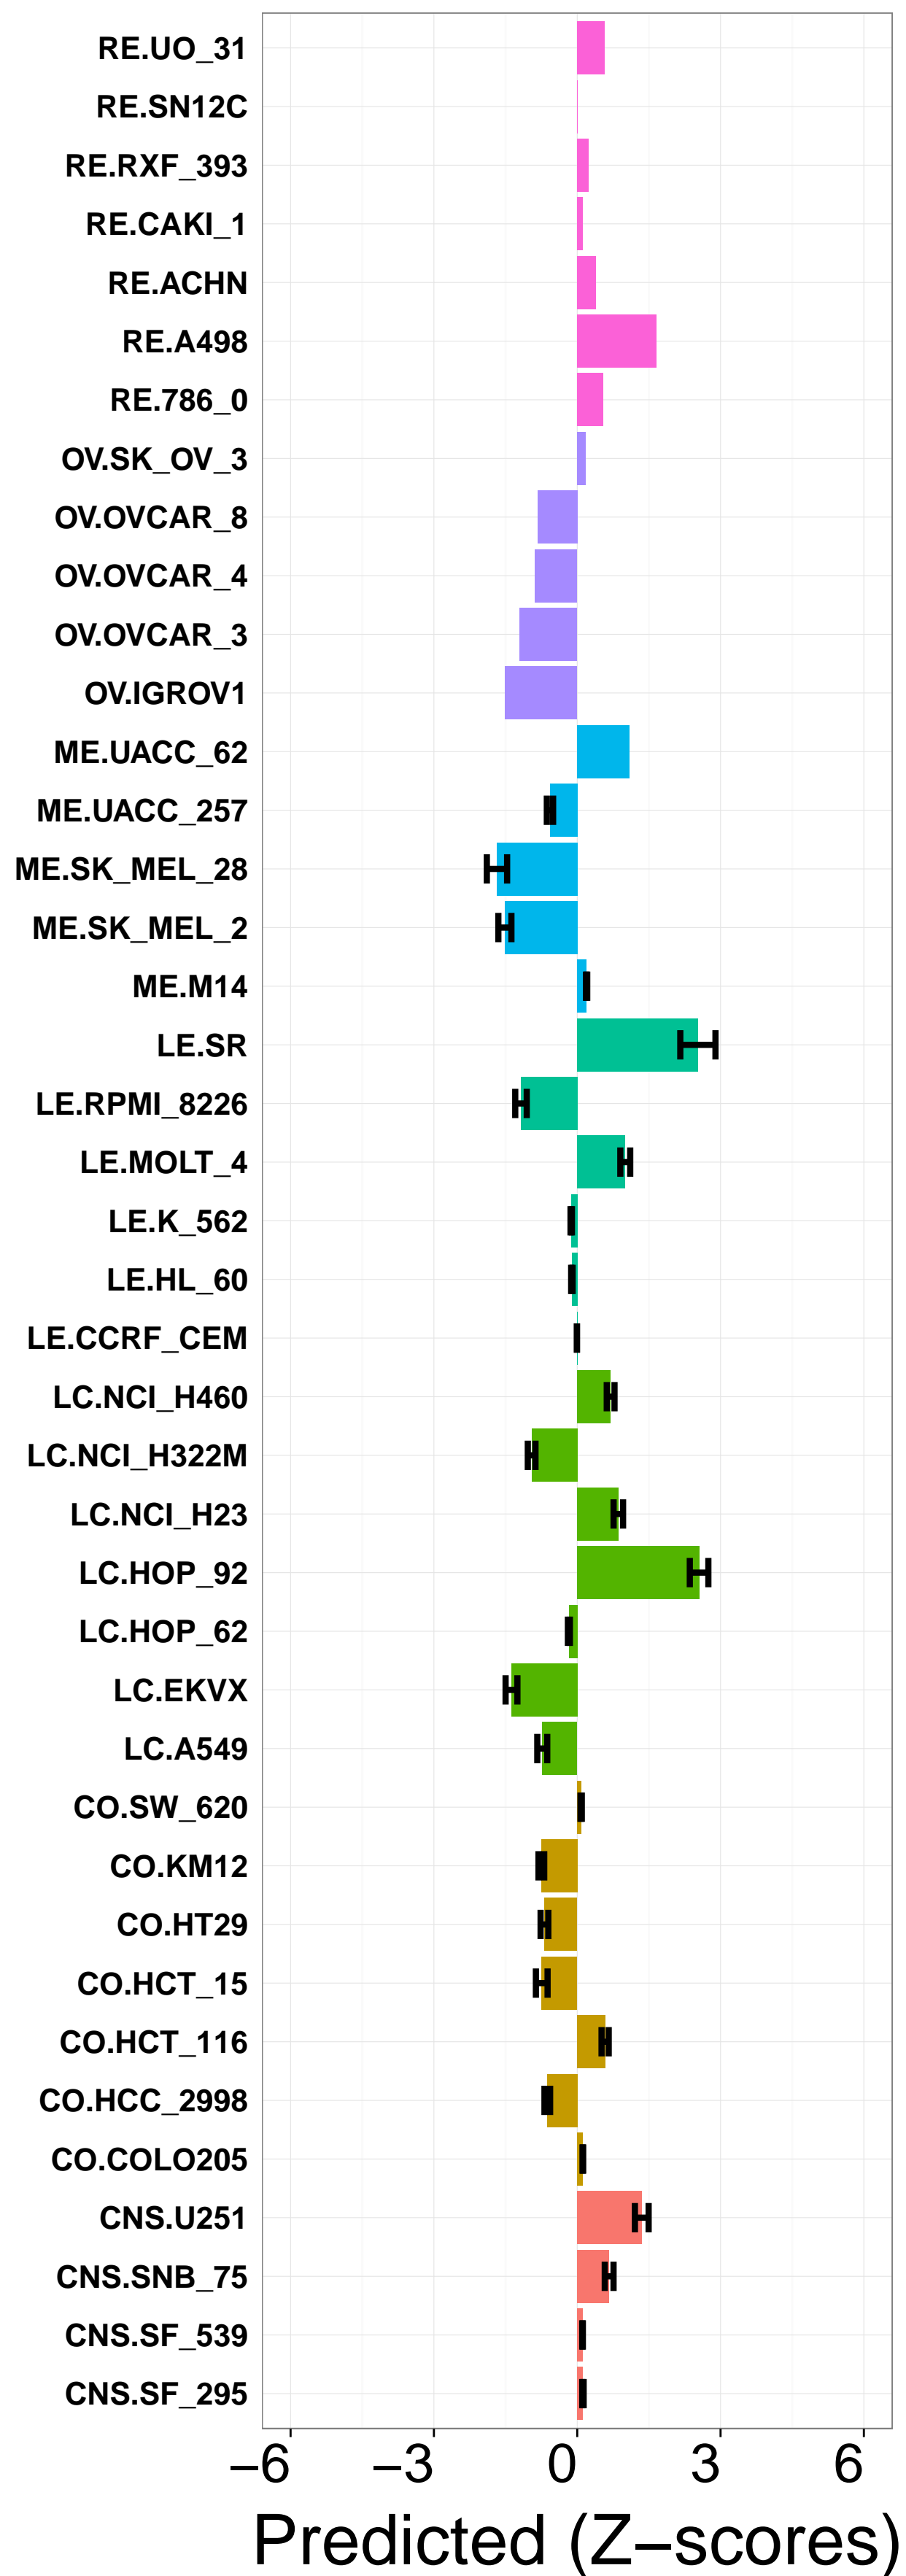



# NSC 63878, Cytarabine\_Hydrochloride (Interpolation)

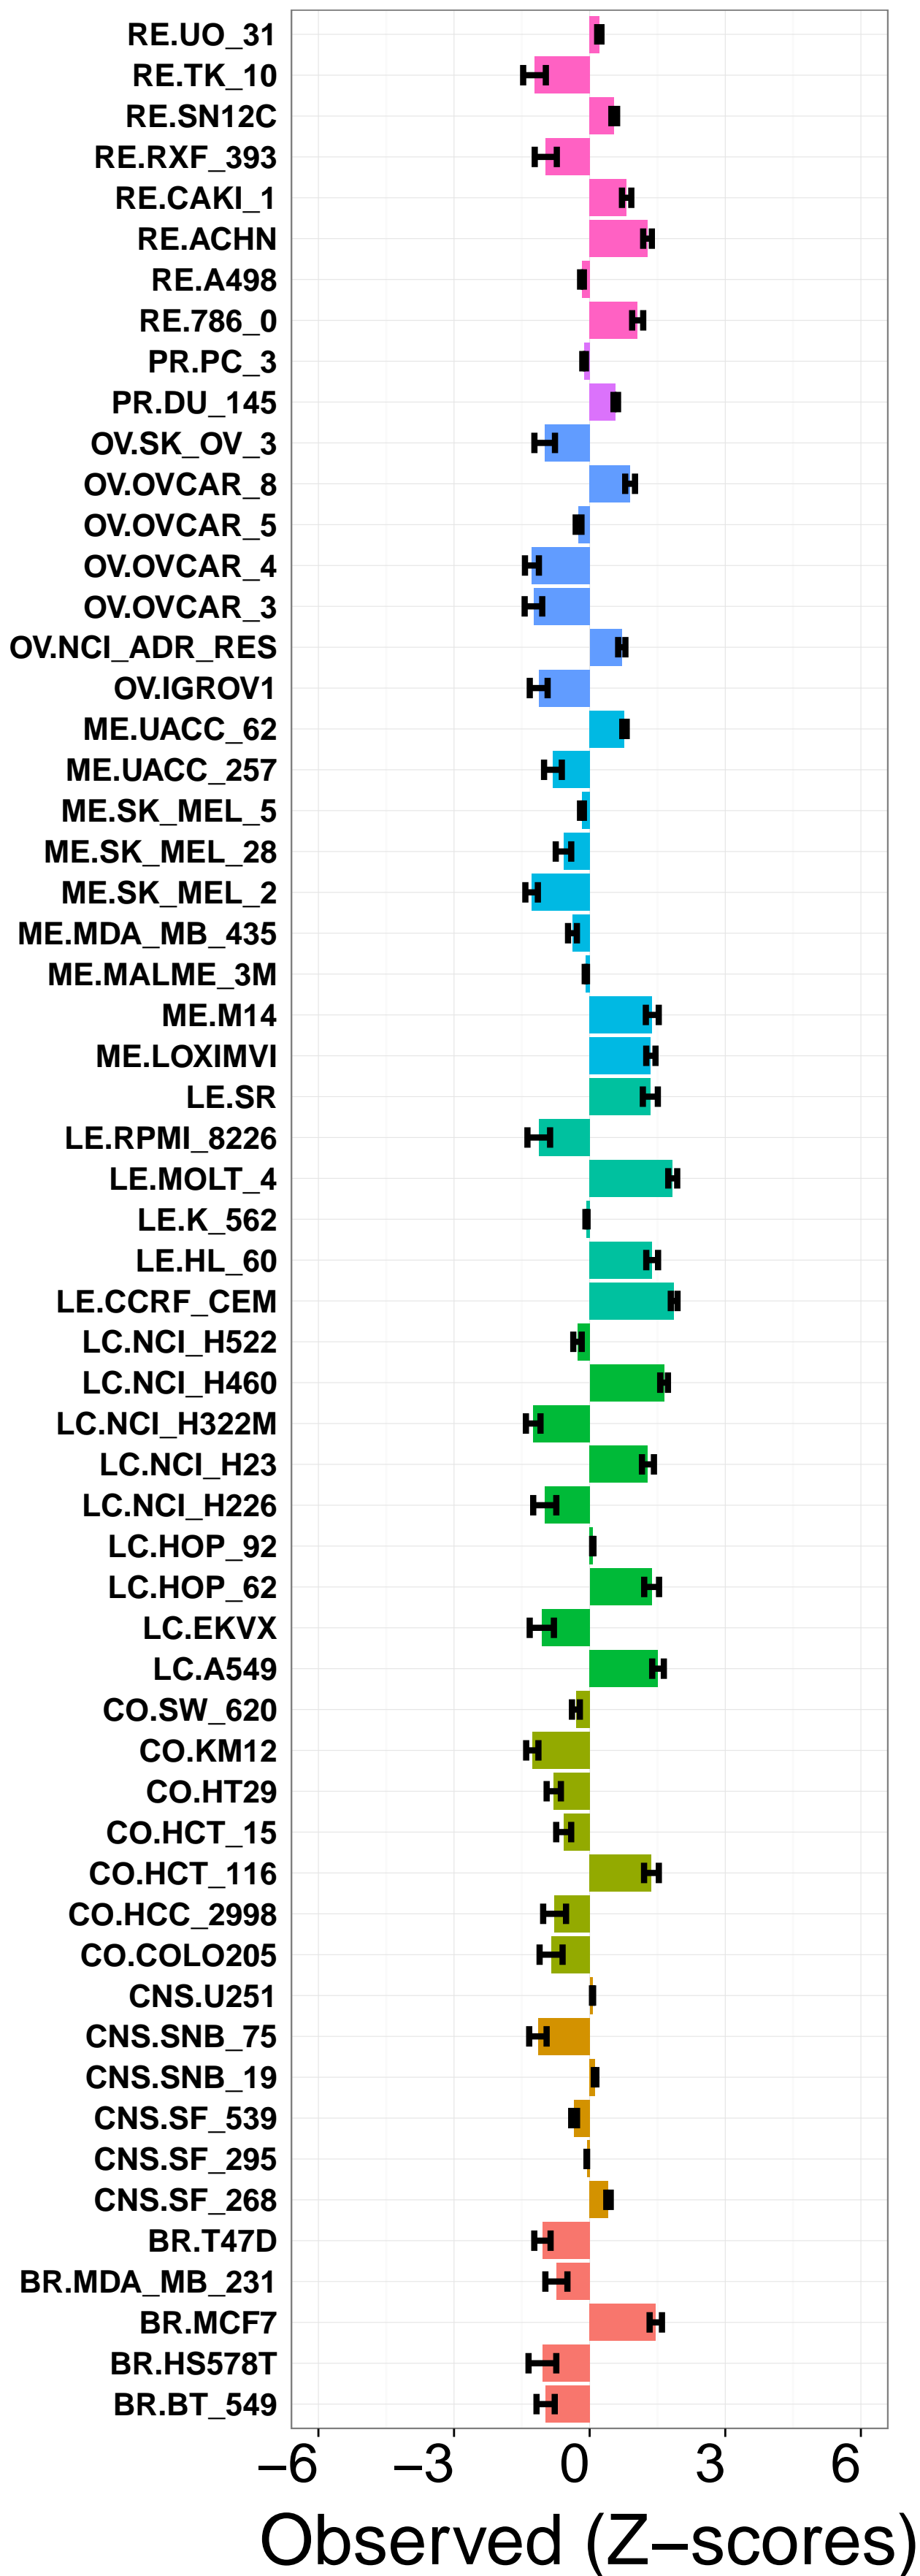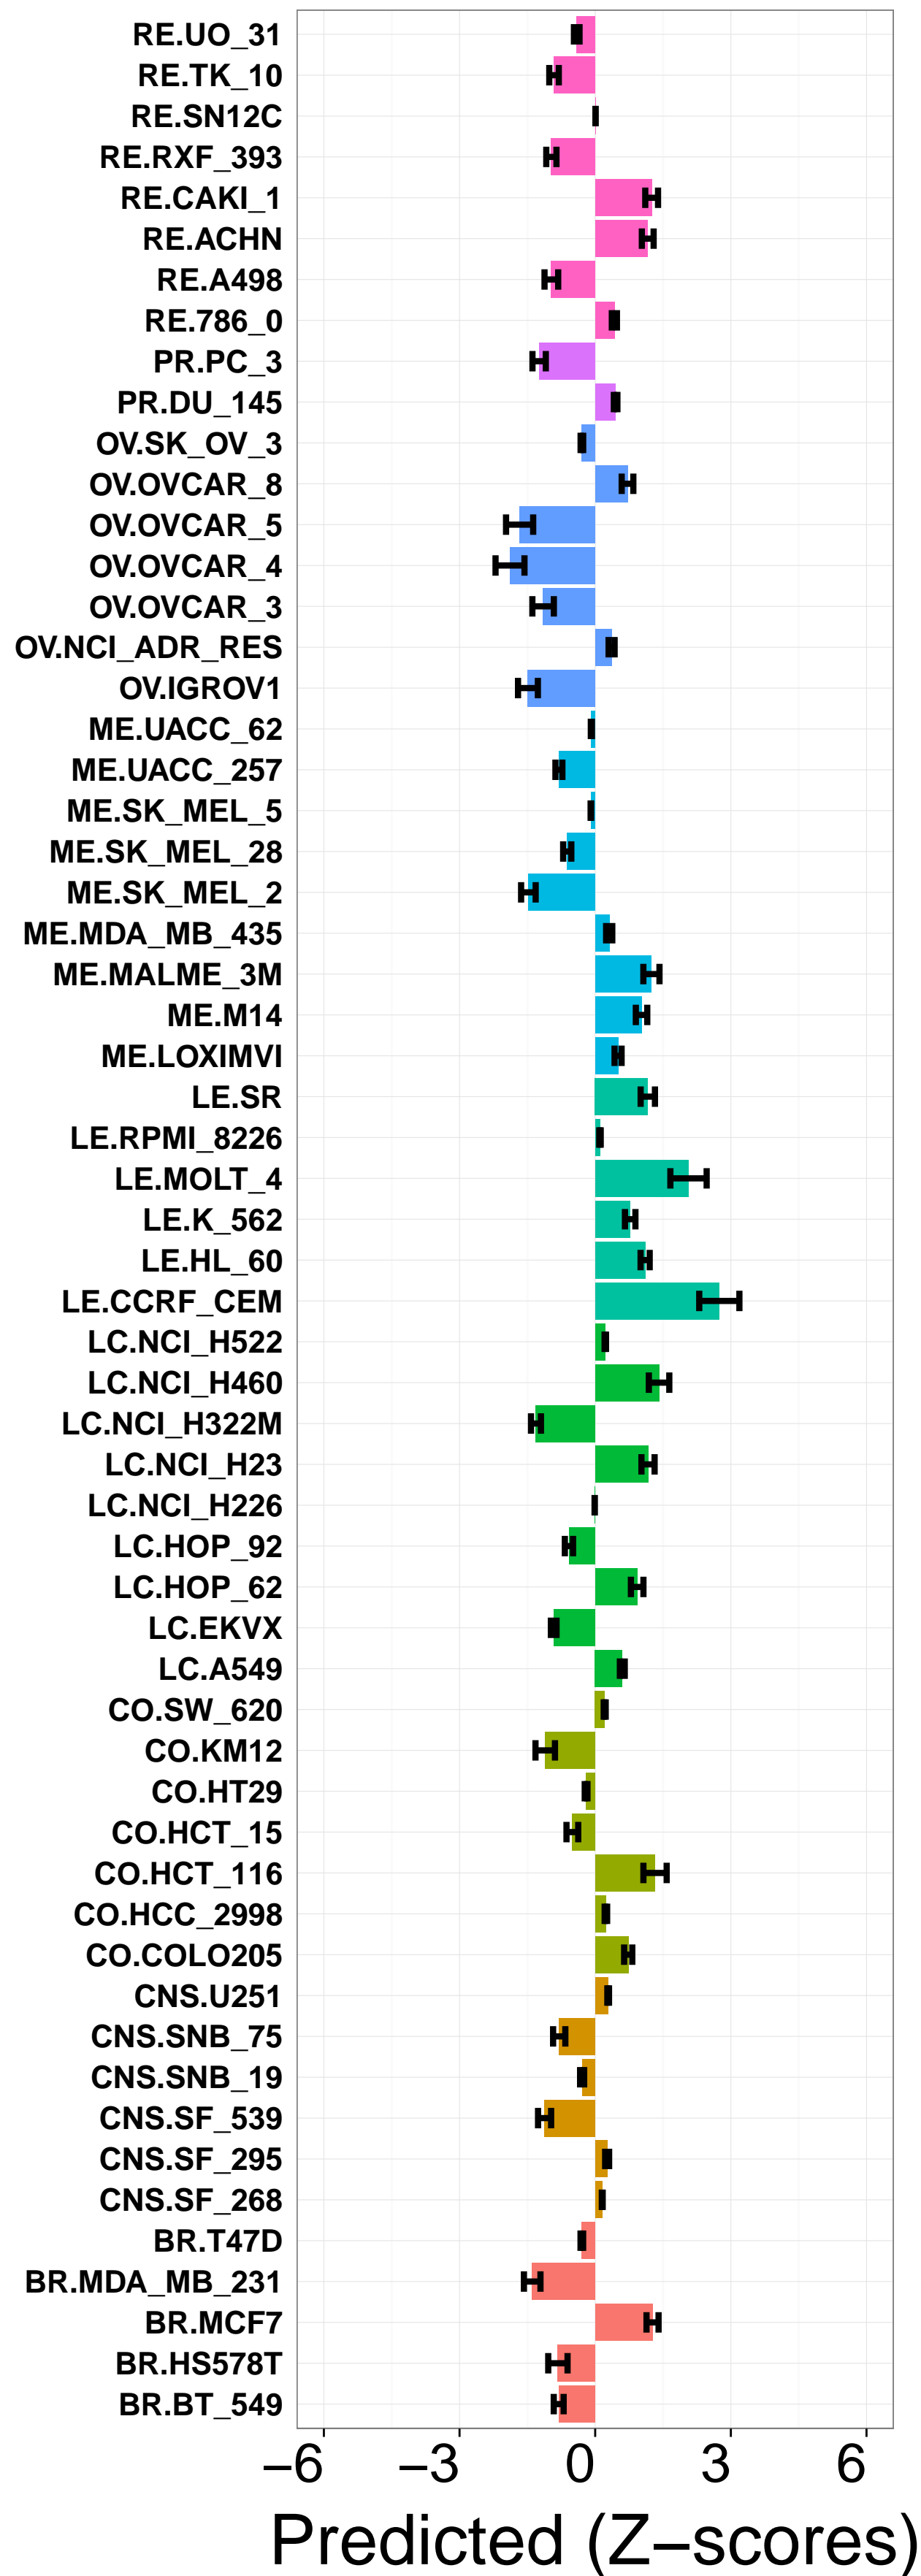

# NSC 639186, (Interpolation)

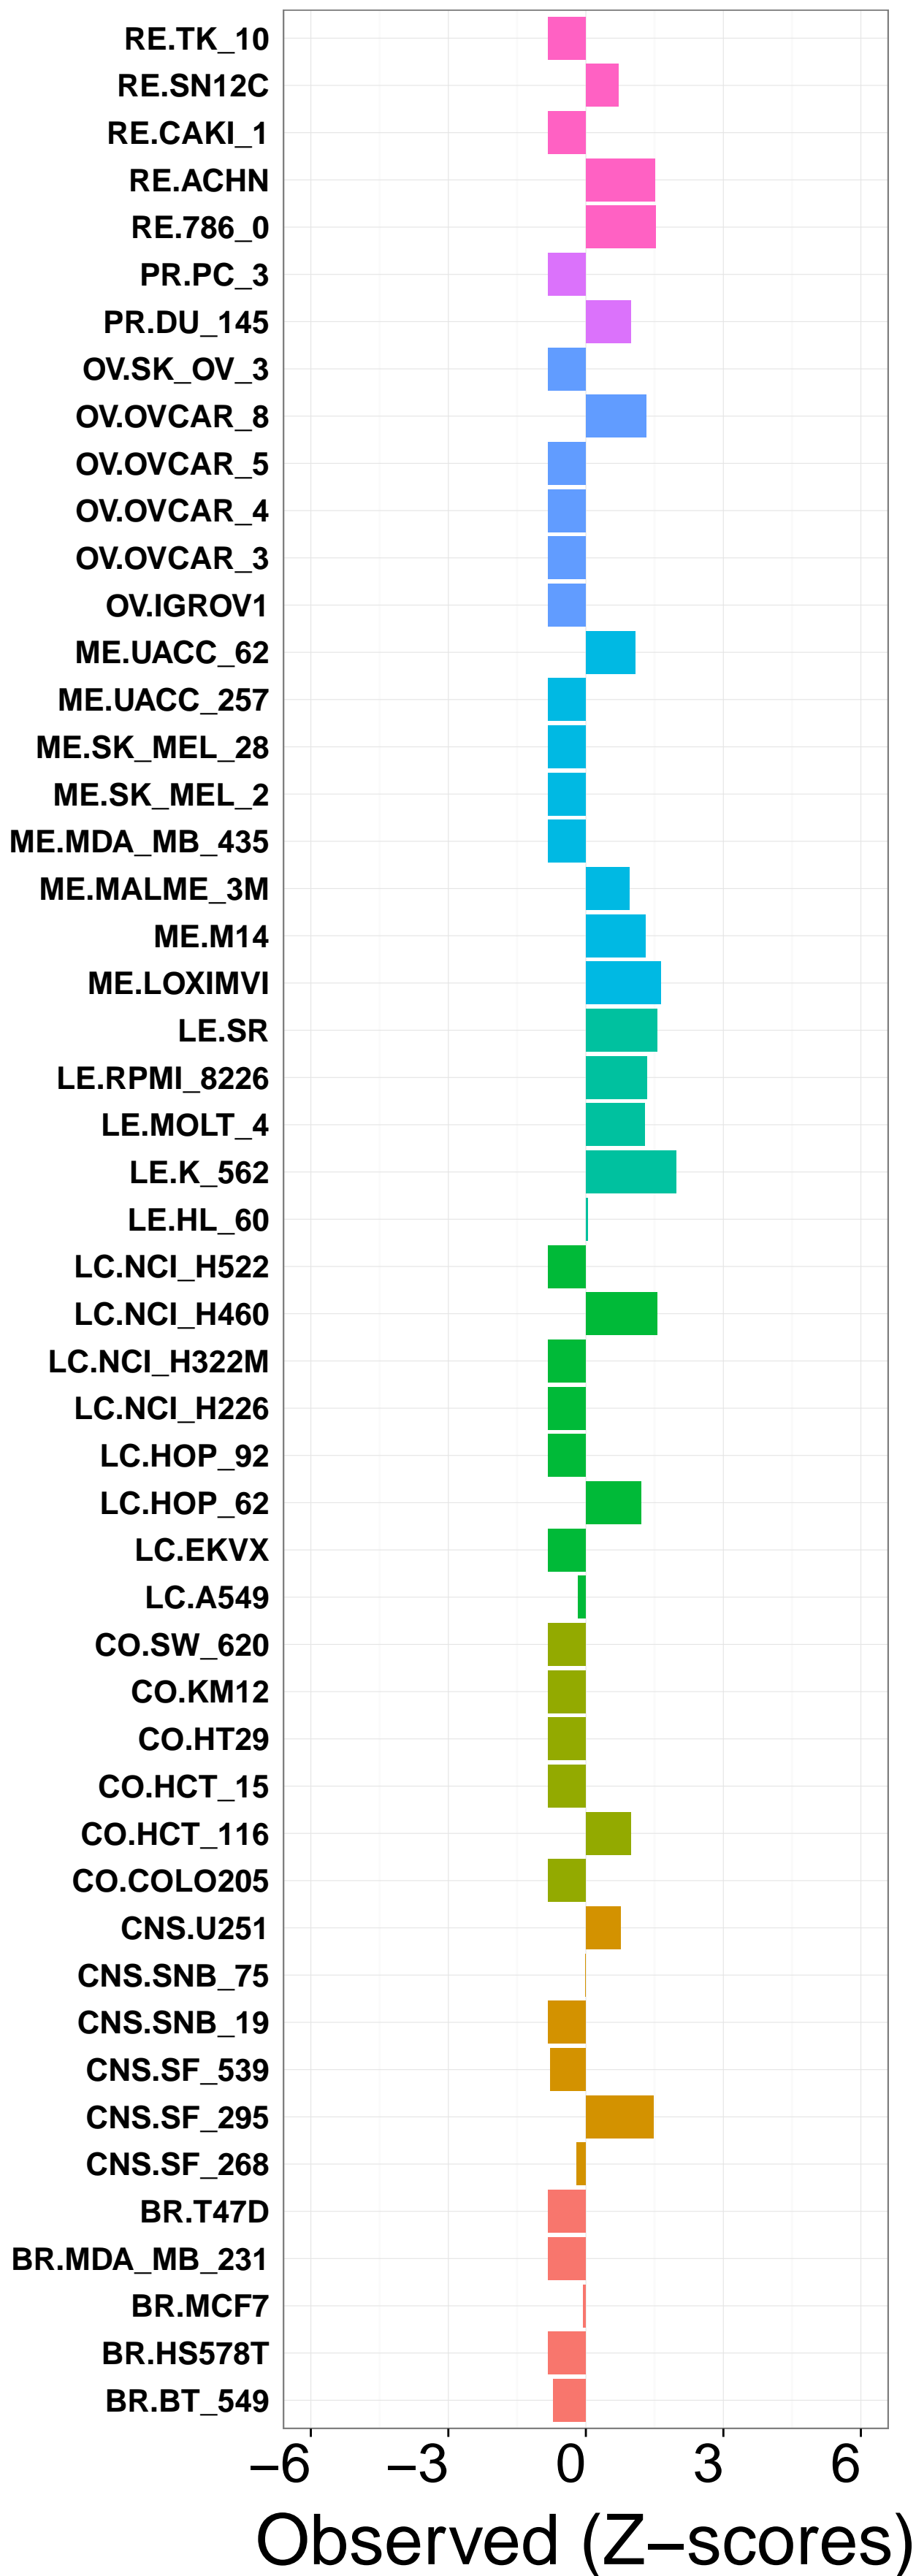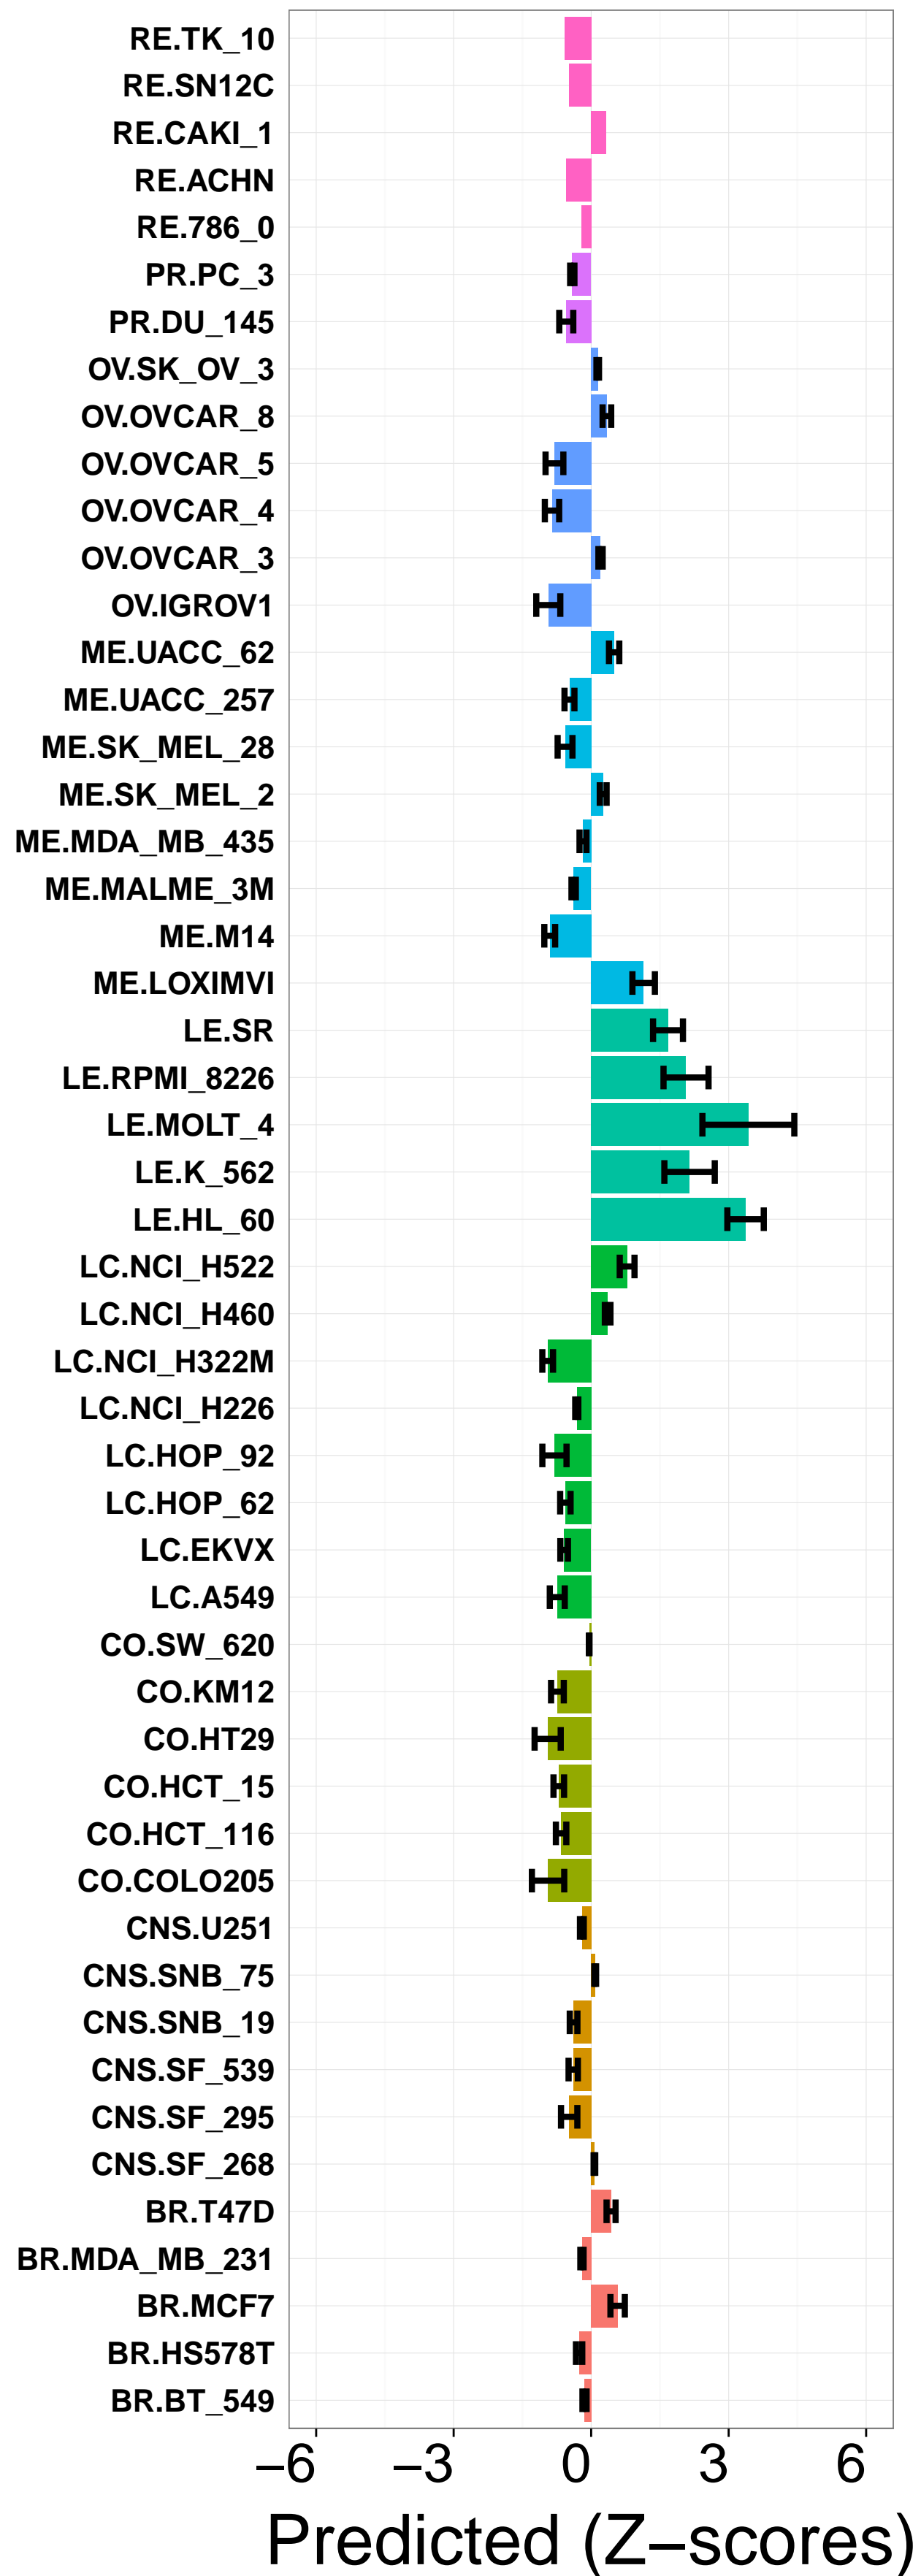

# NSC 656576, (Interpolation)

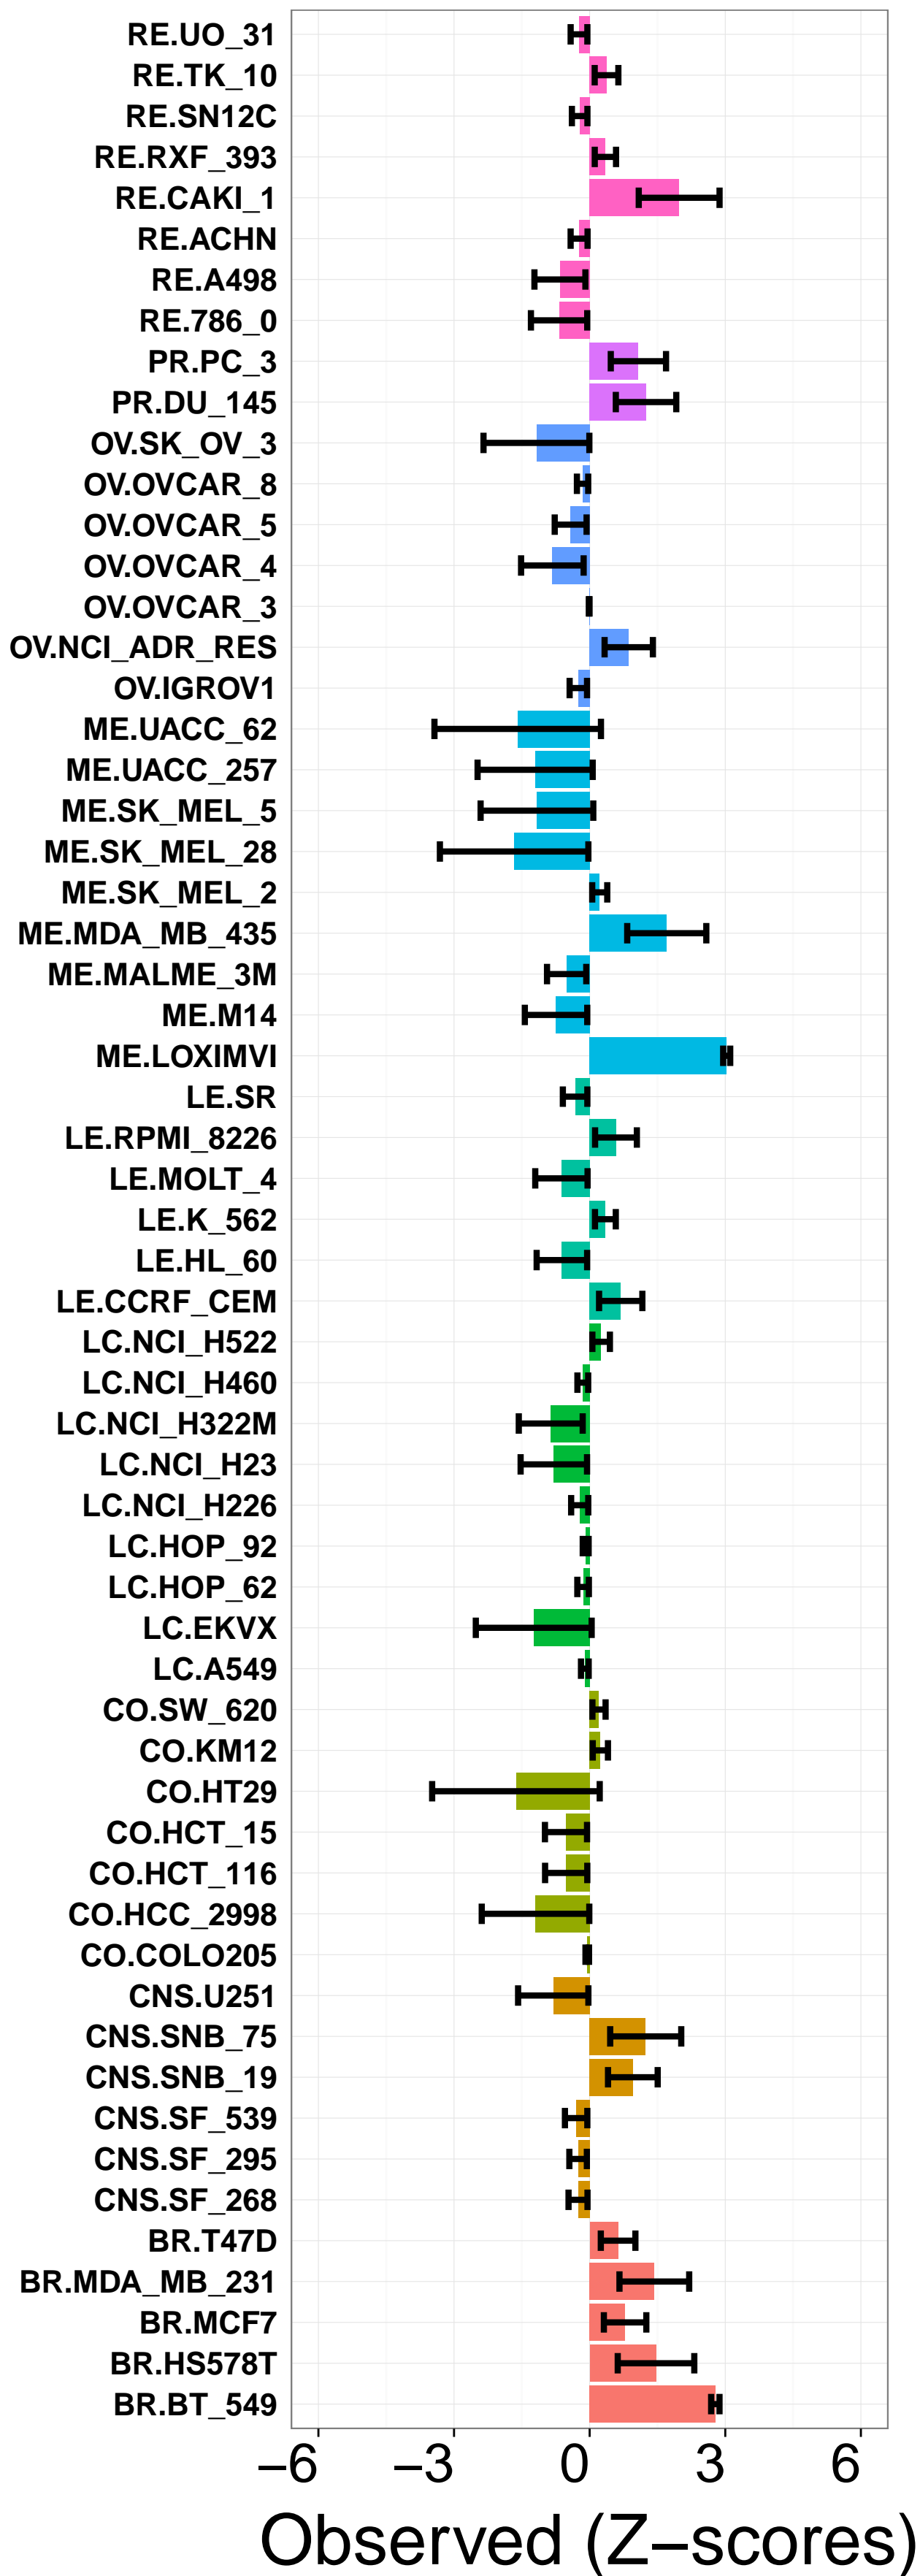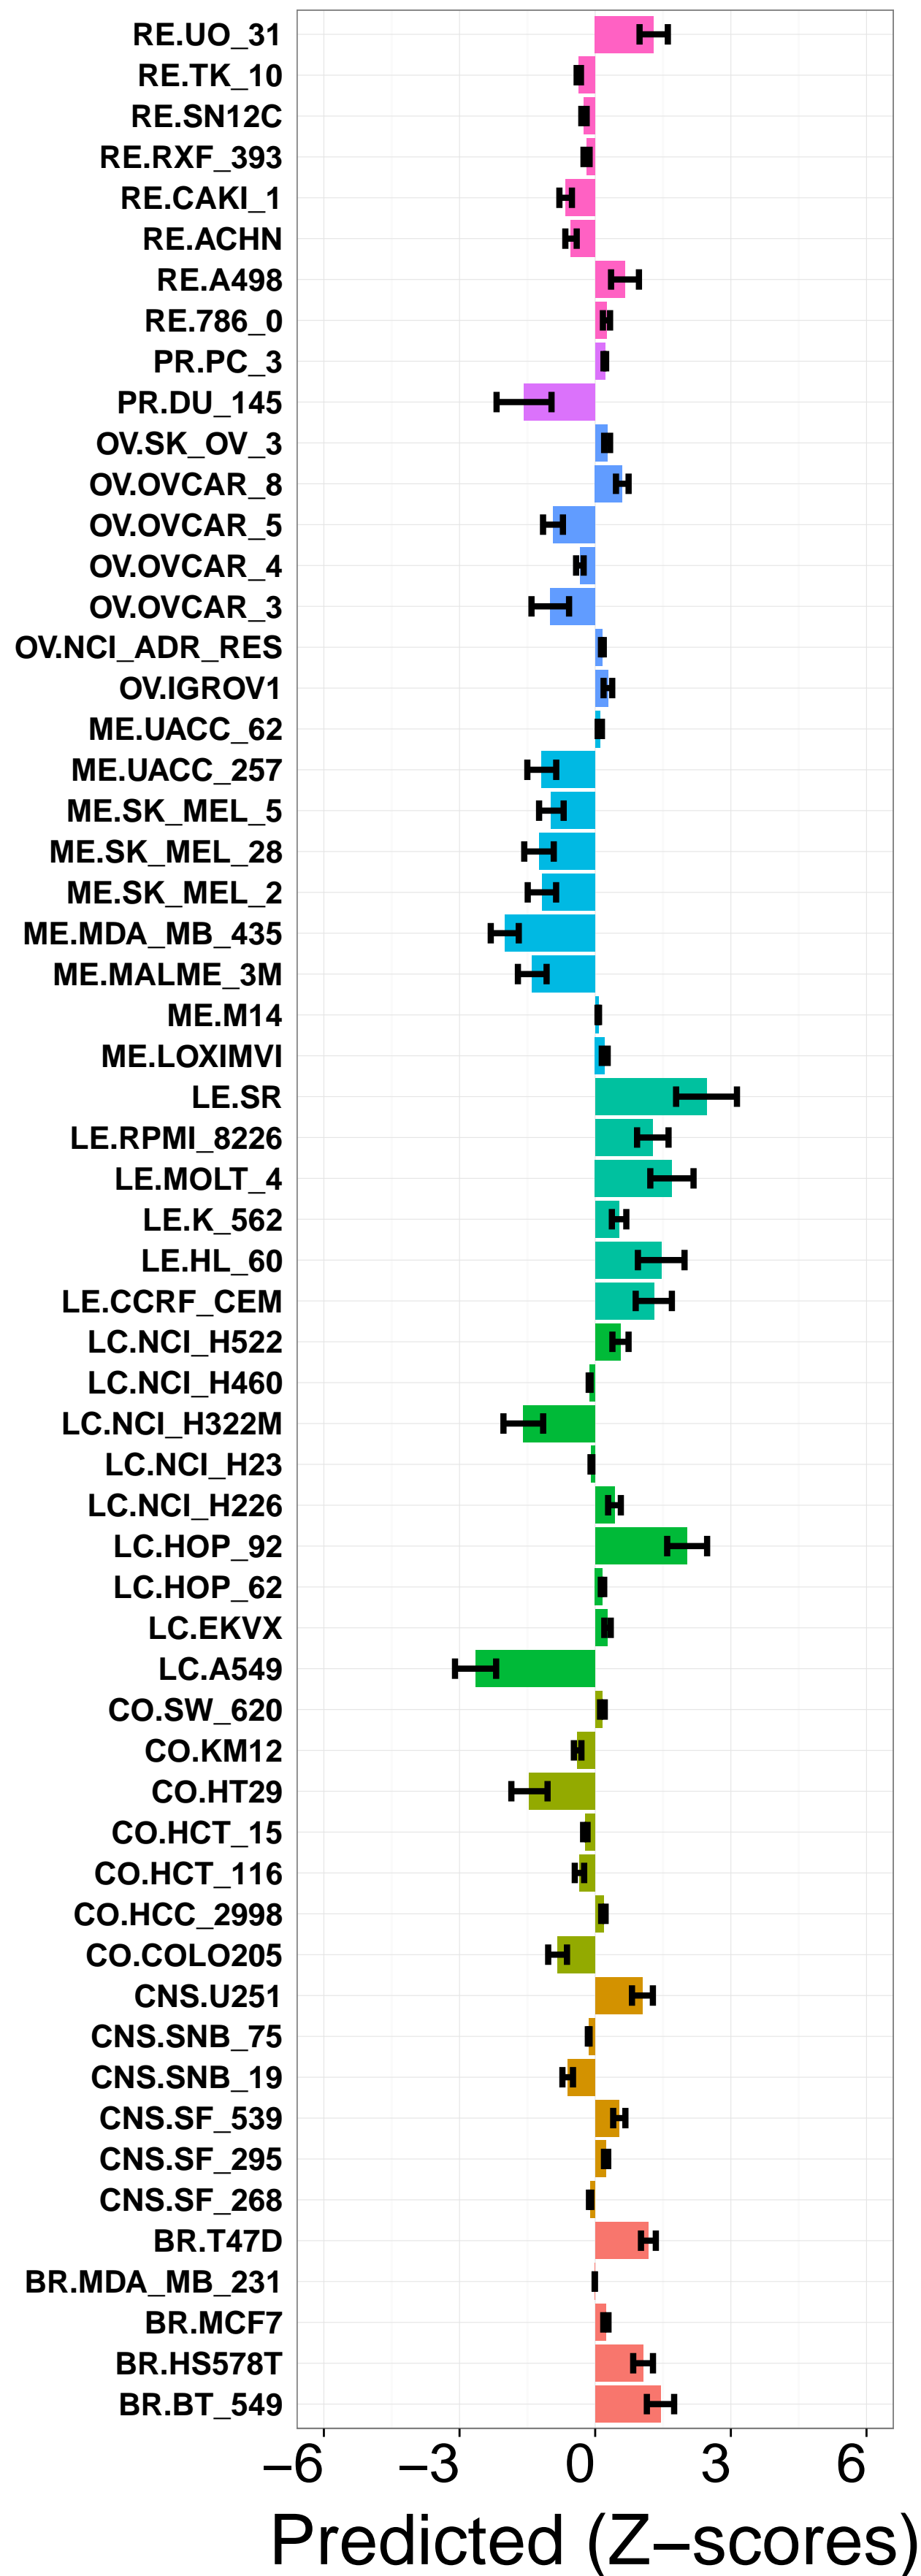

# NSC 673596, (Interpolation)

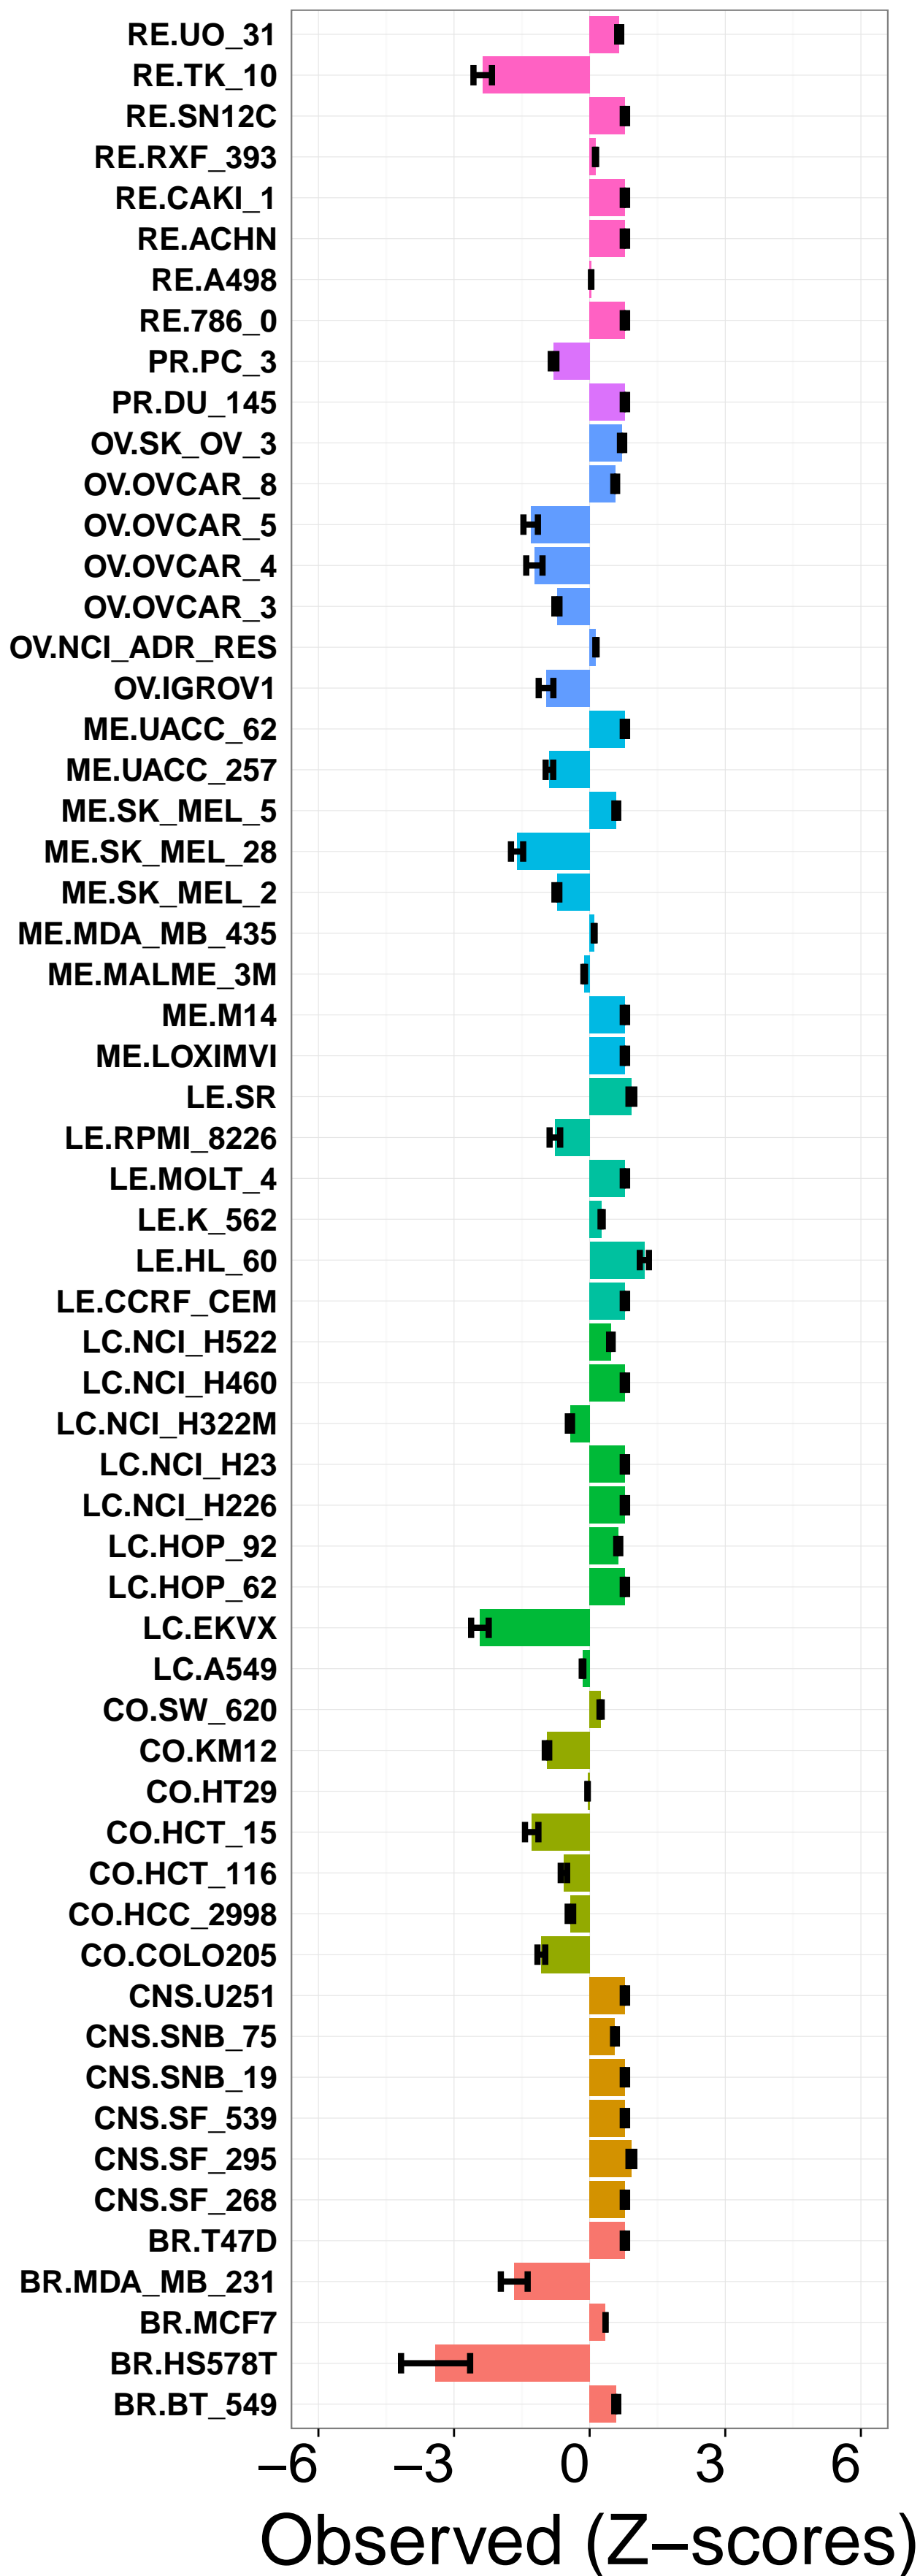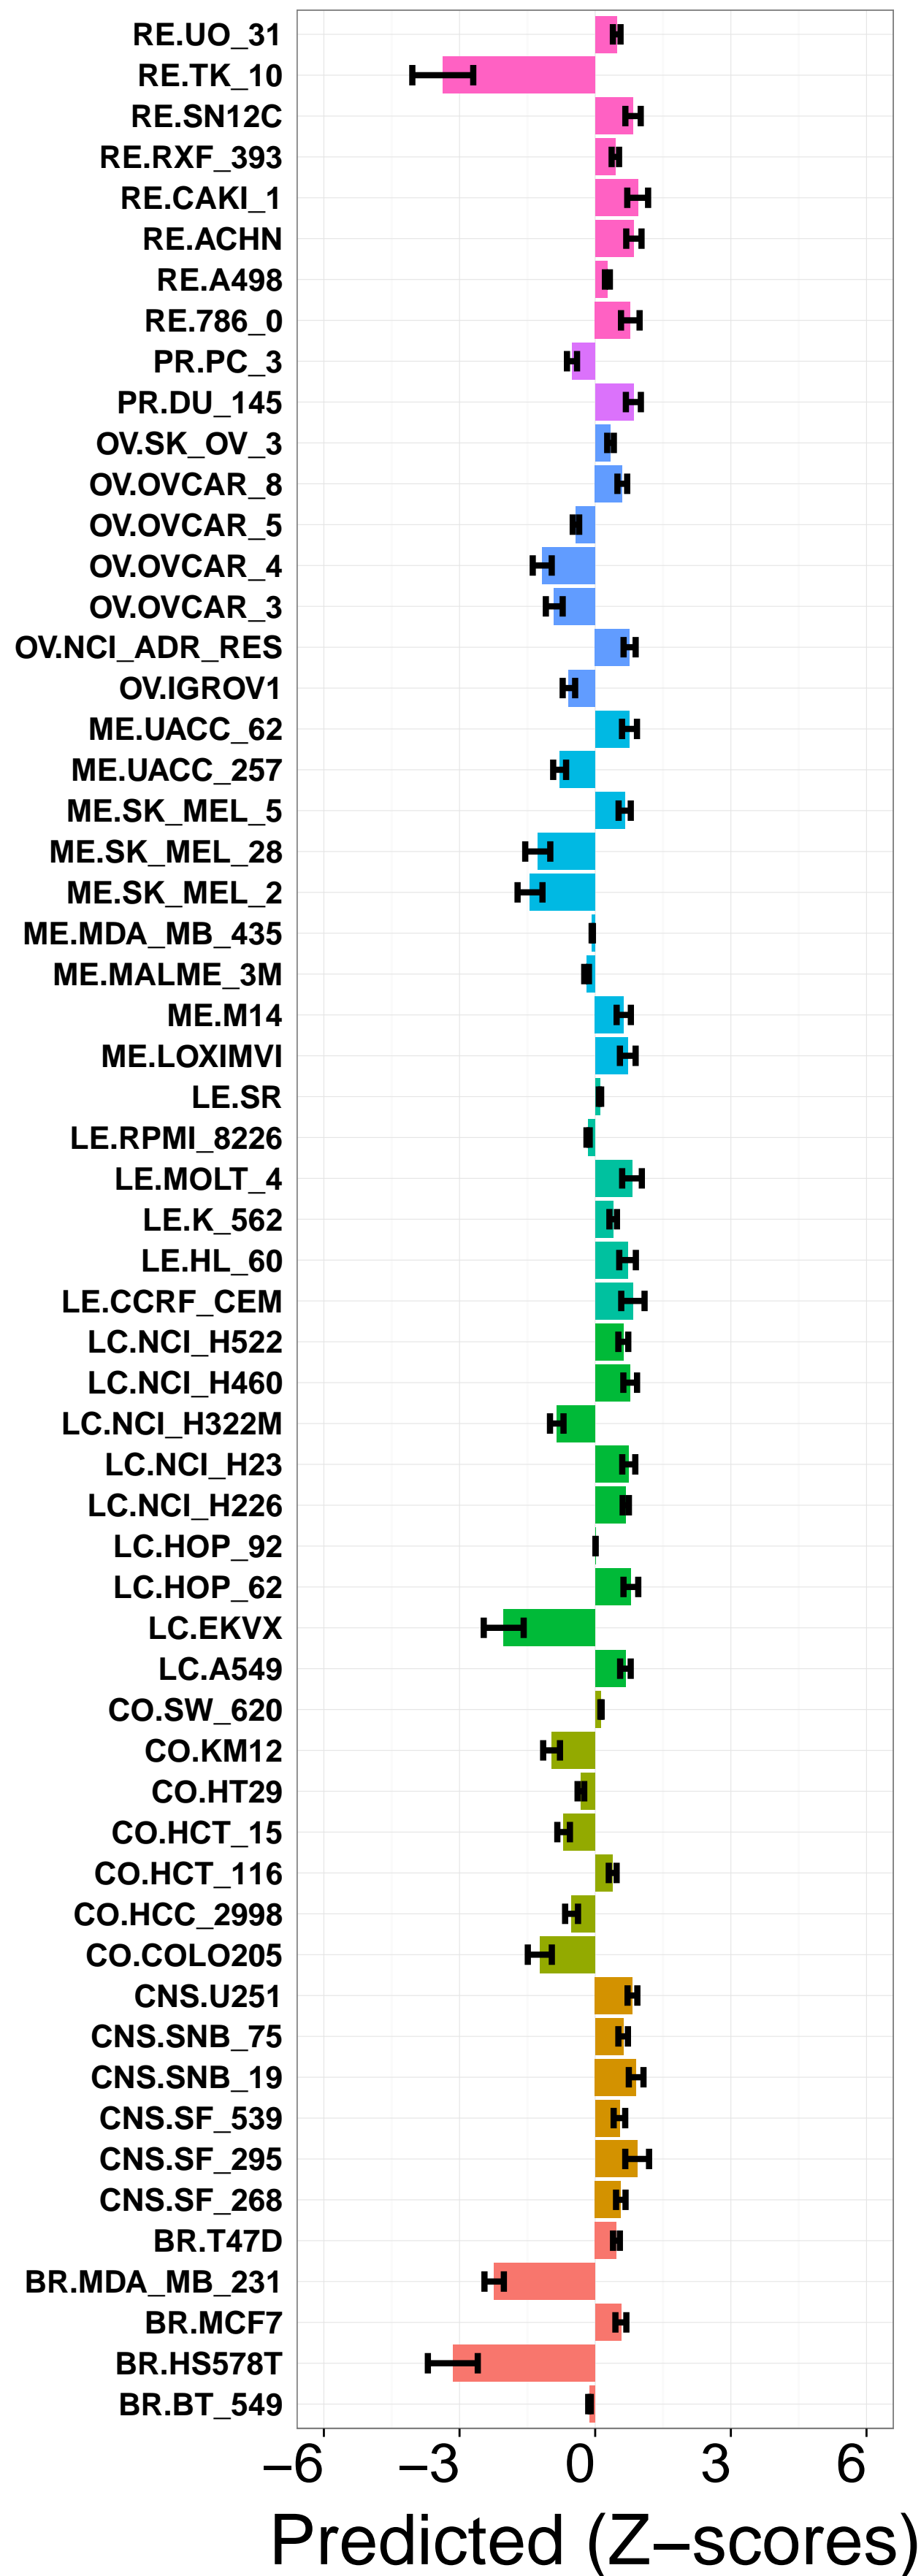

# NSC 686288, (Interpolation)

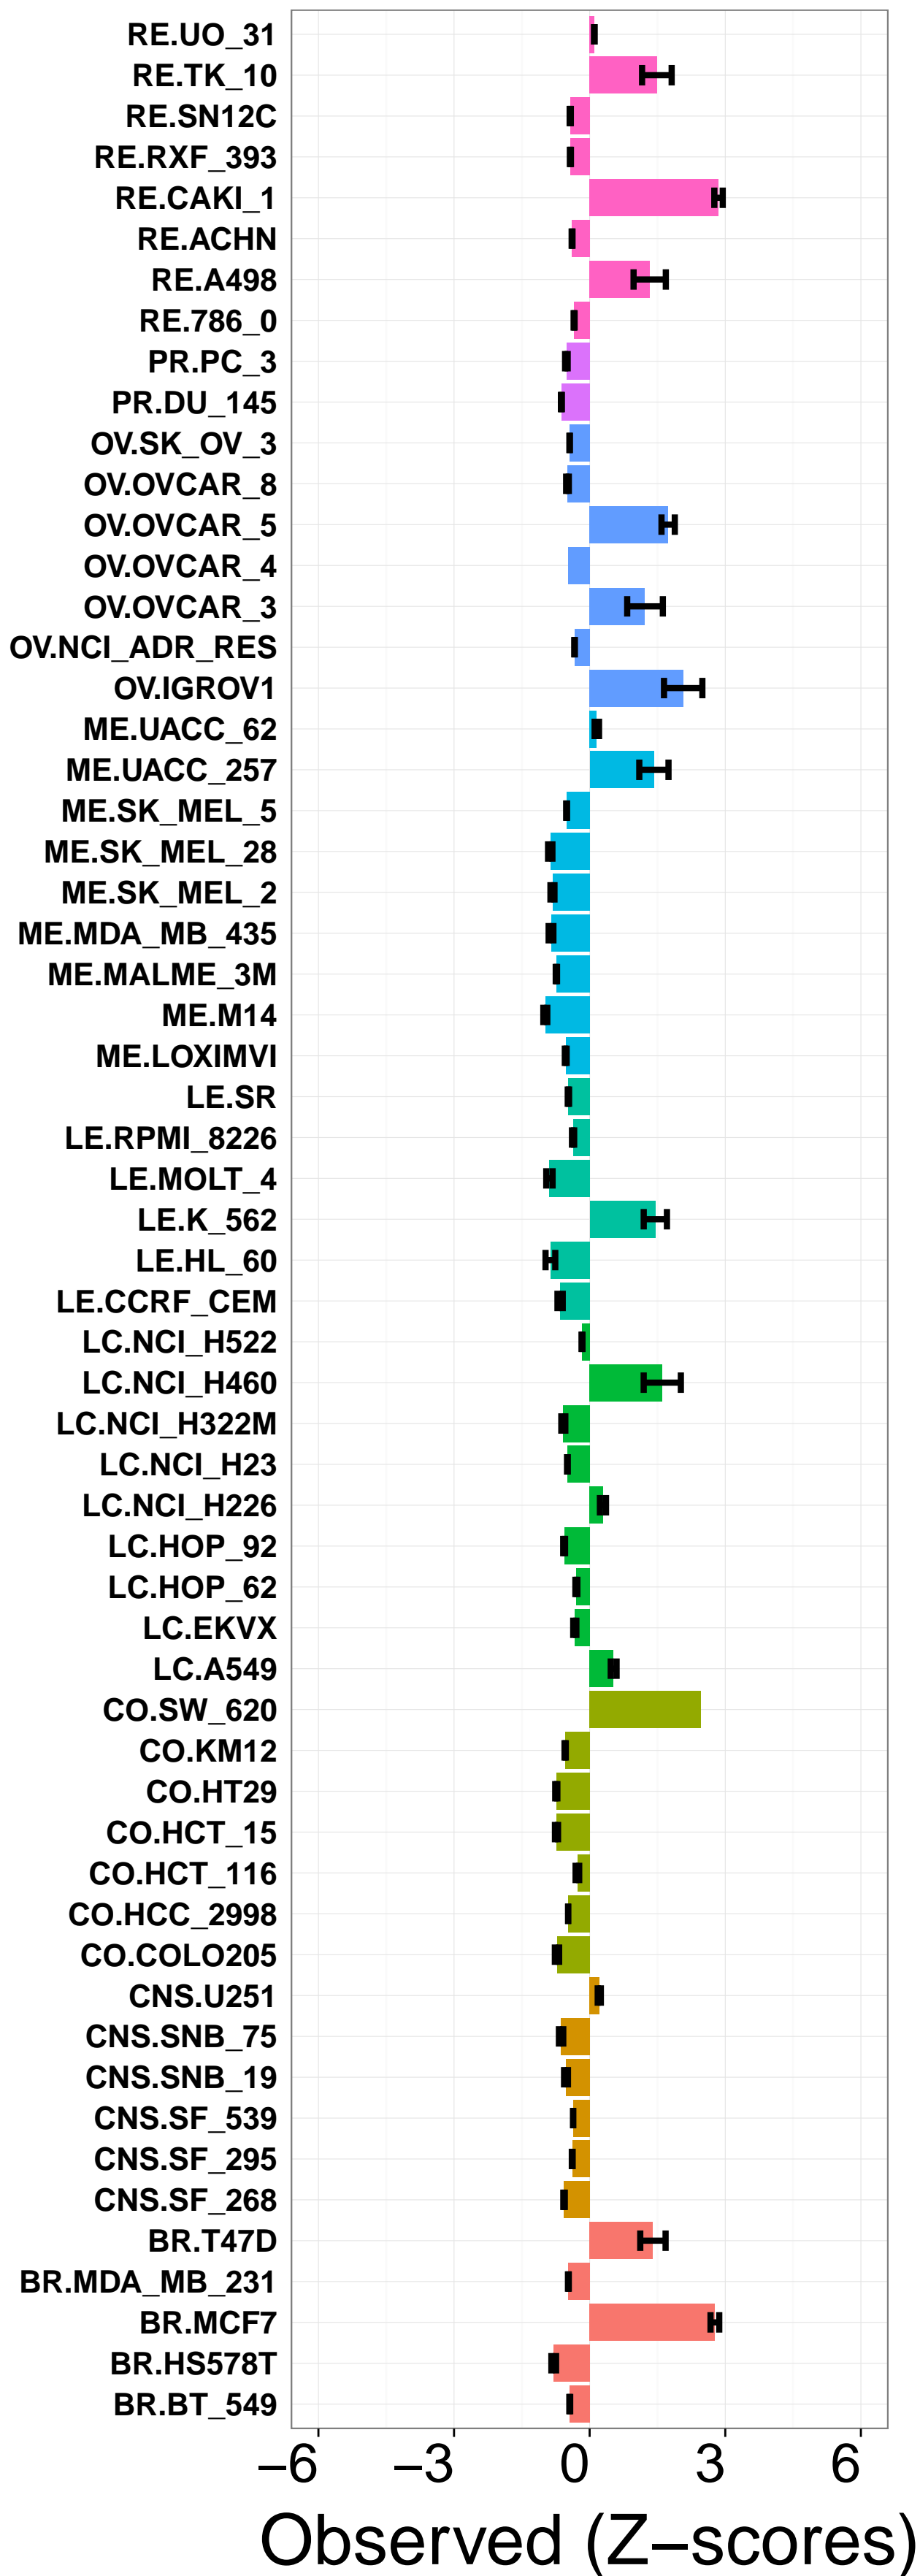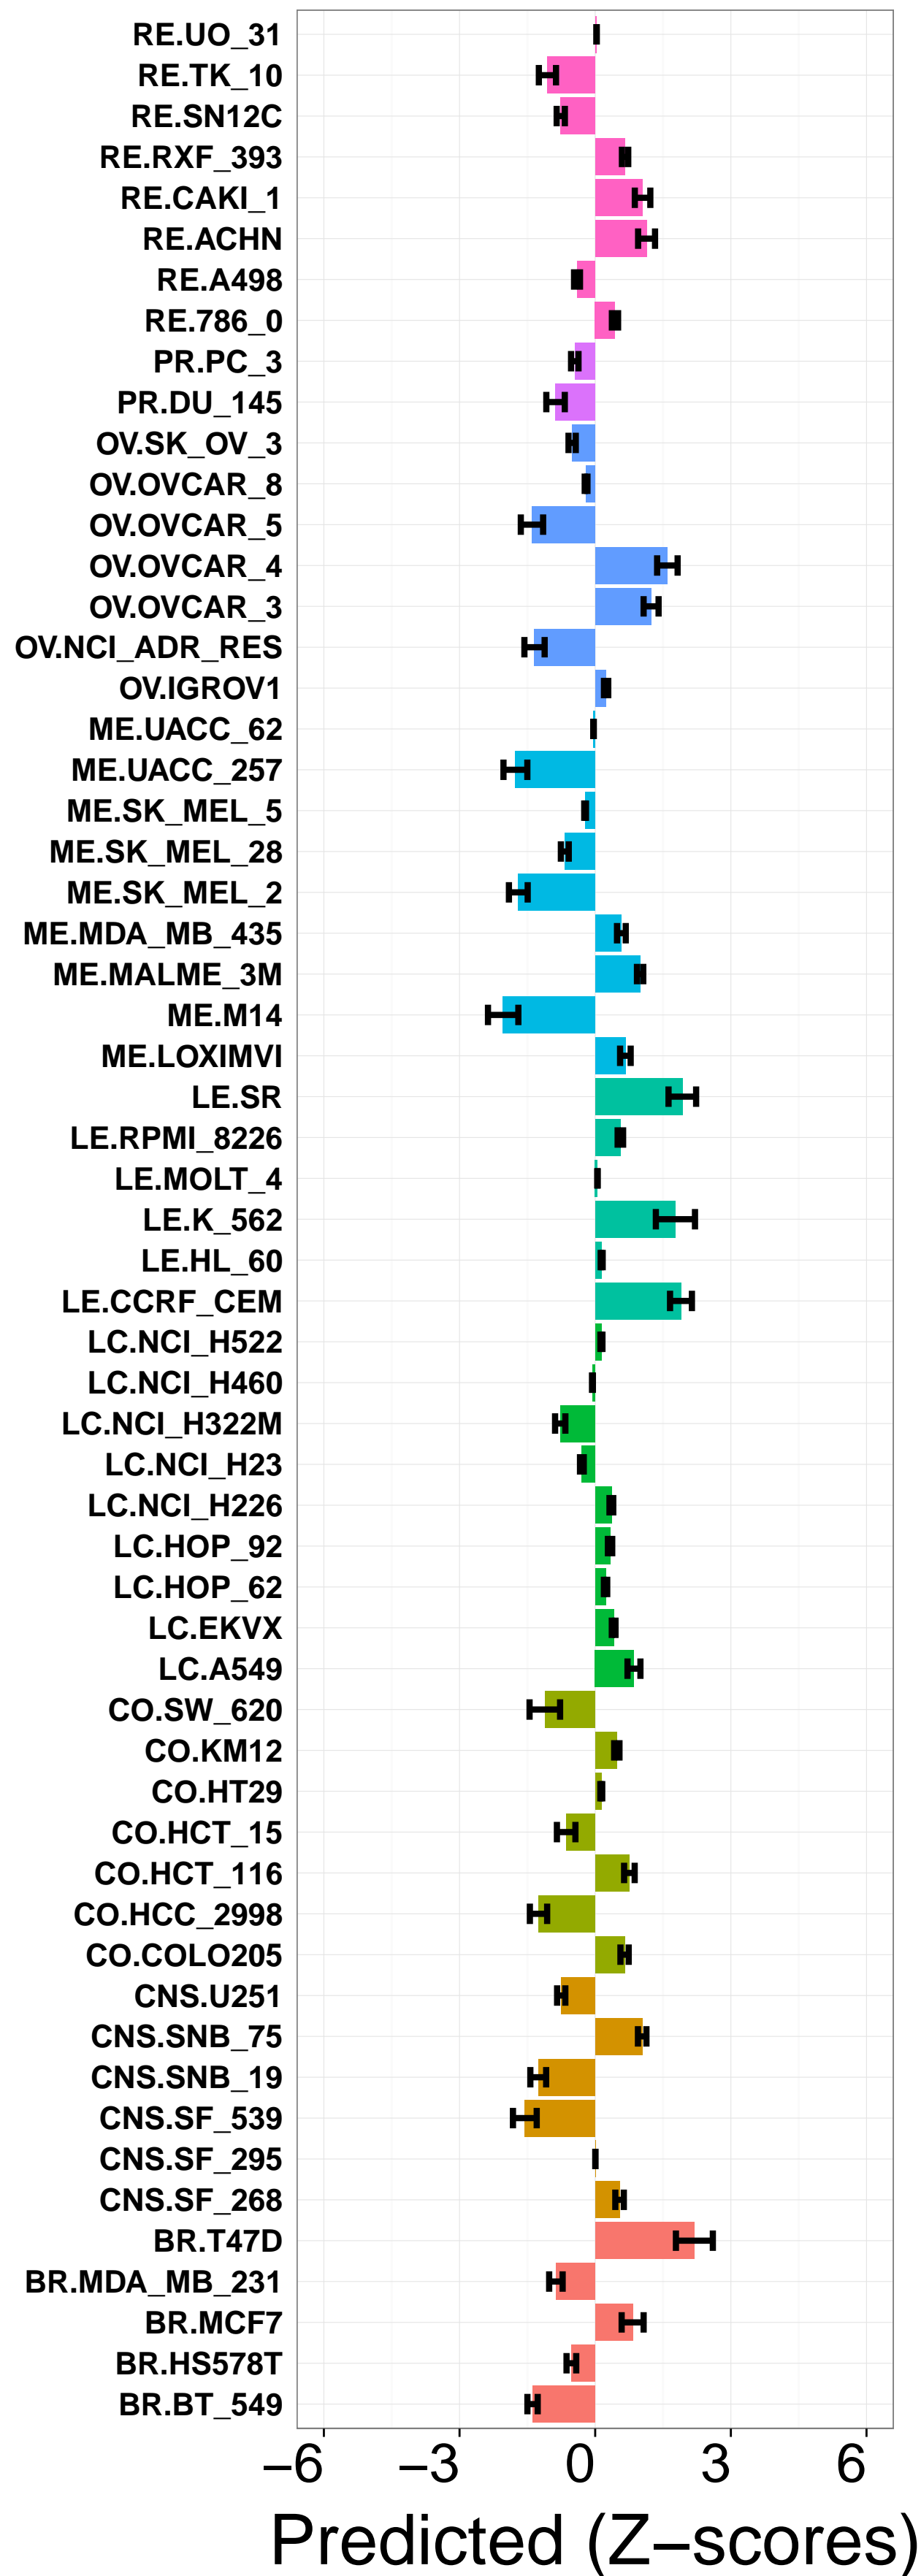



# NSC 698037, (Interpolation)

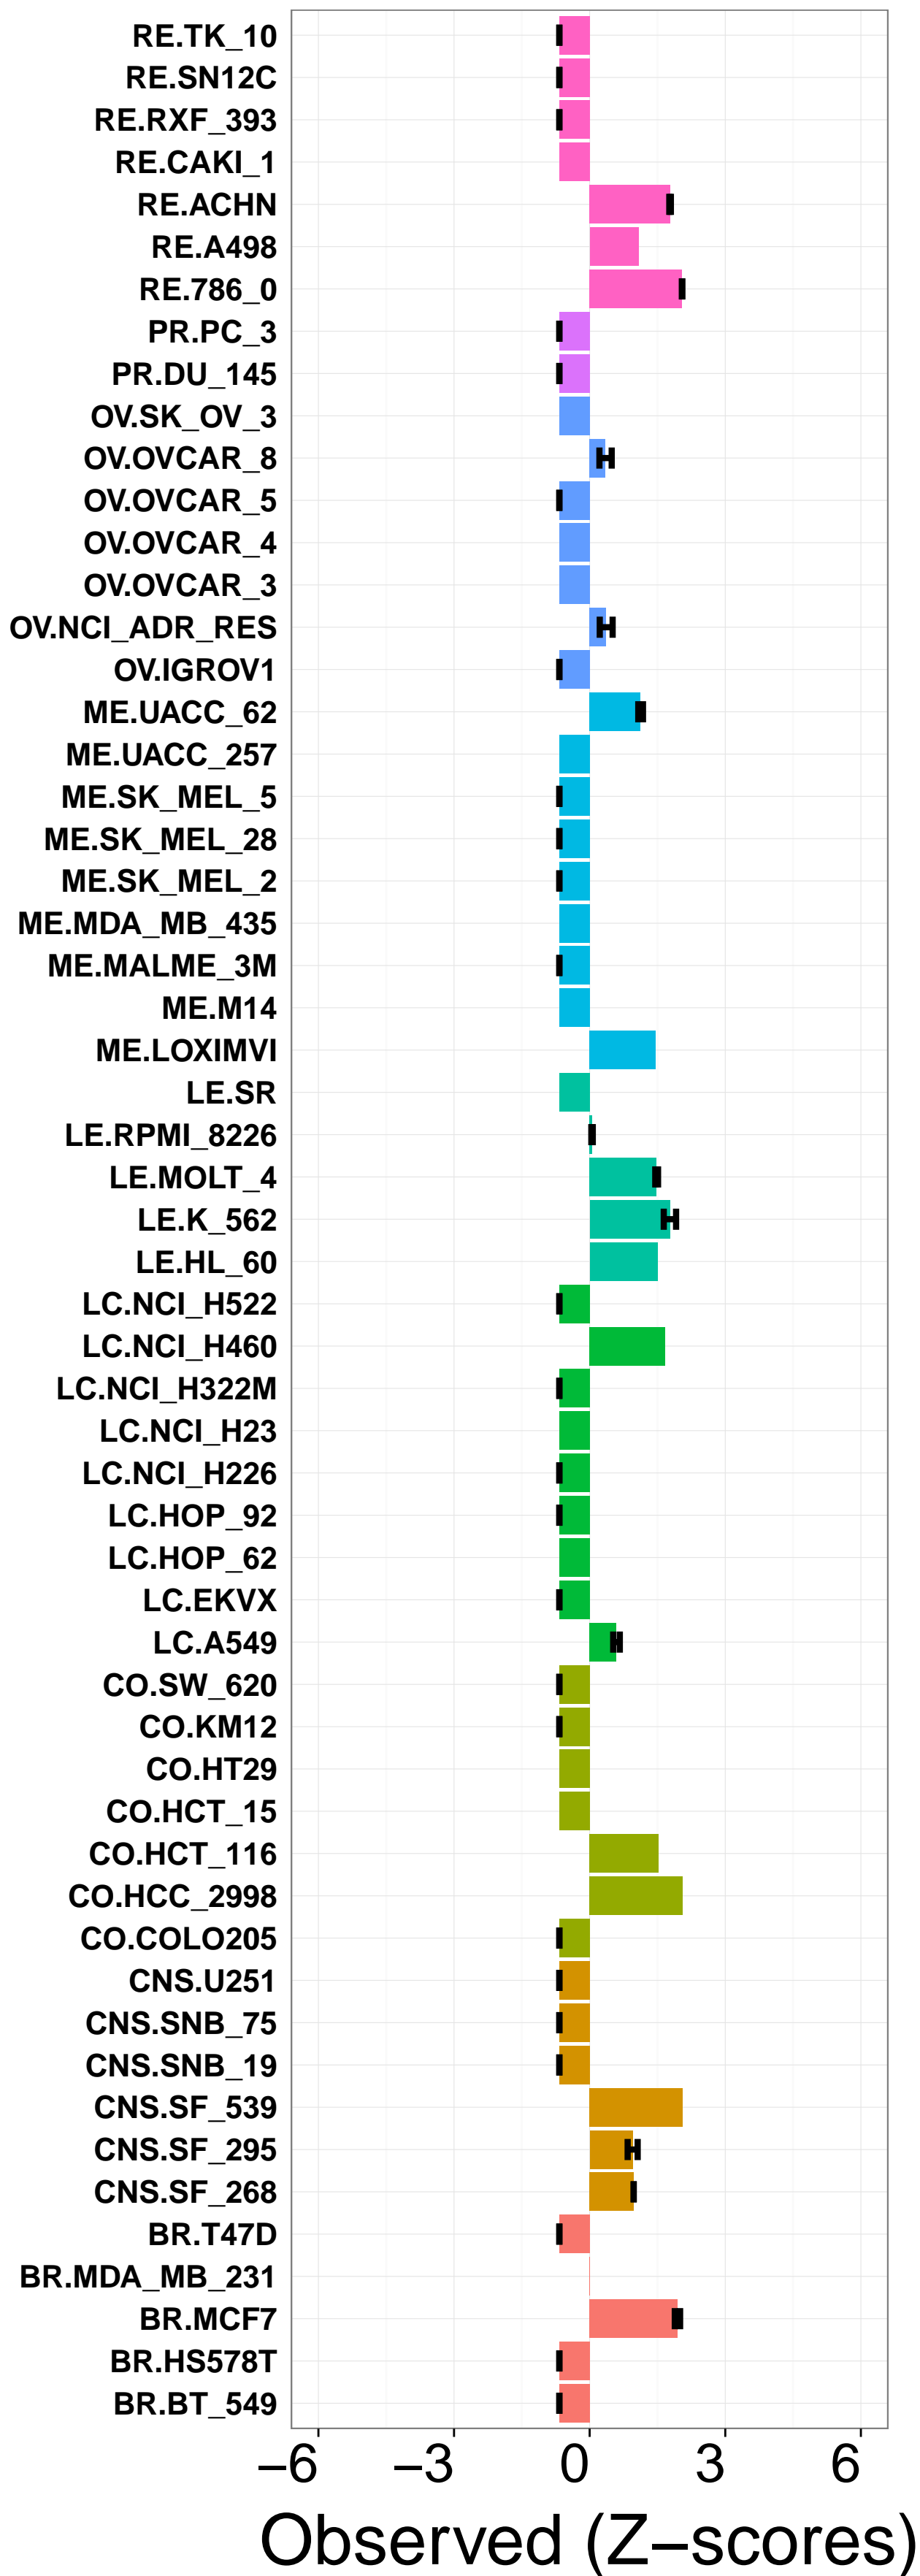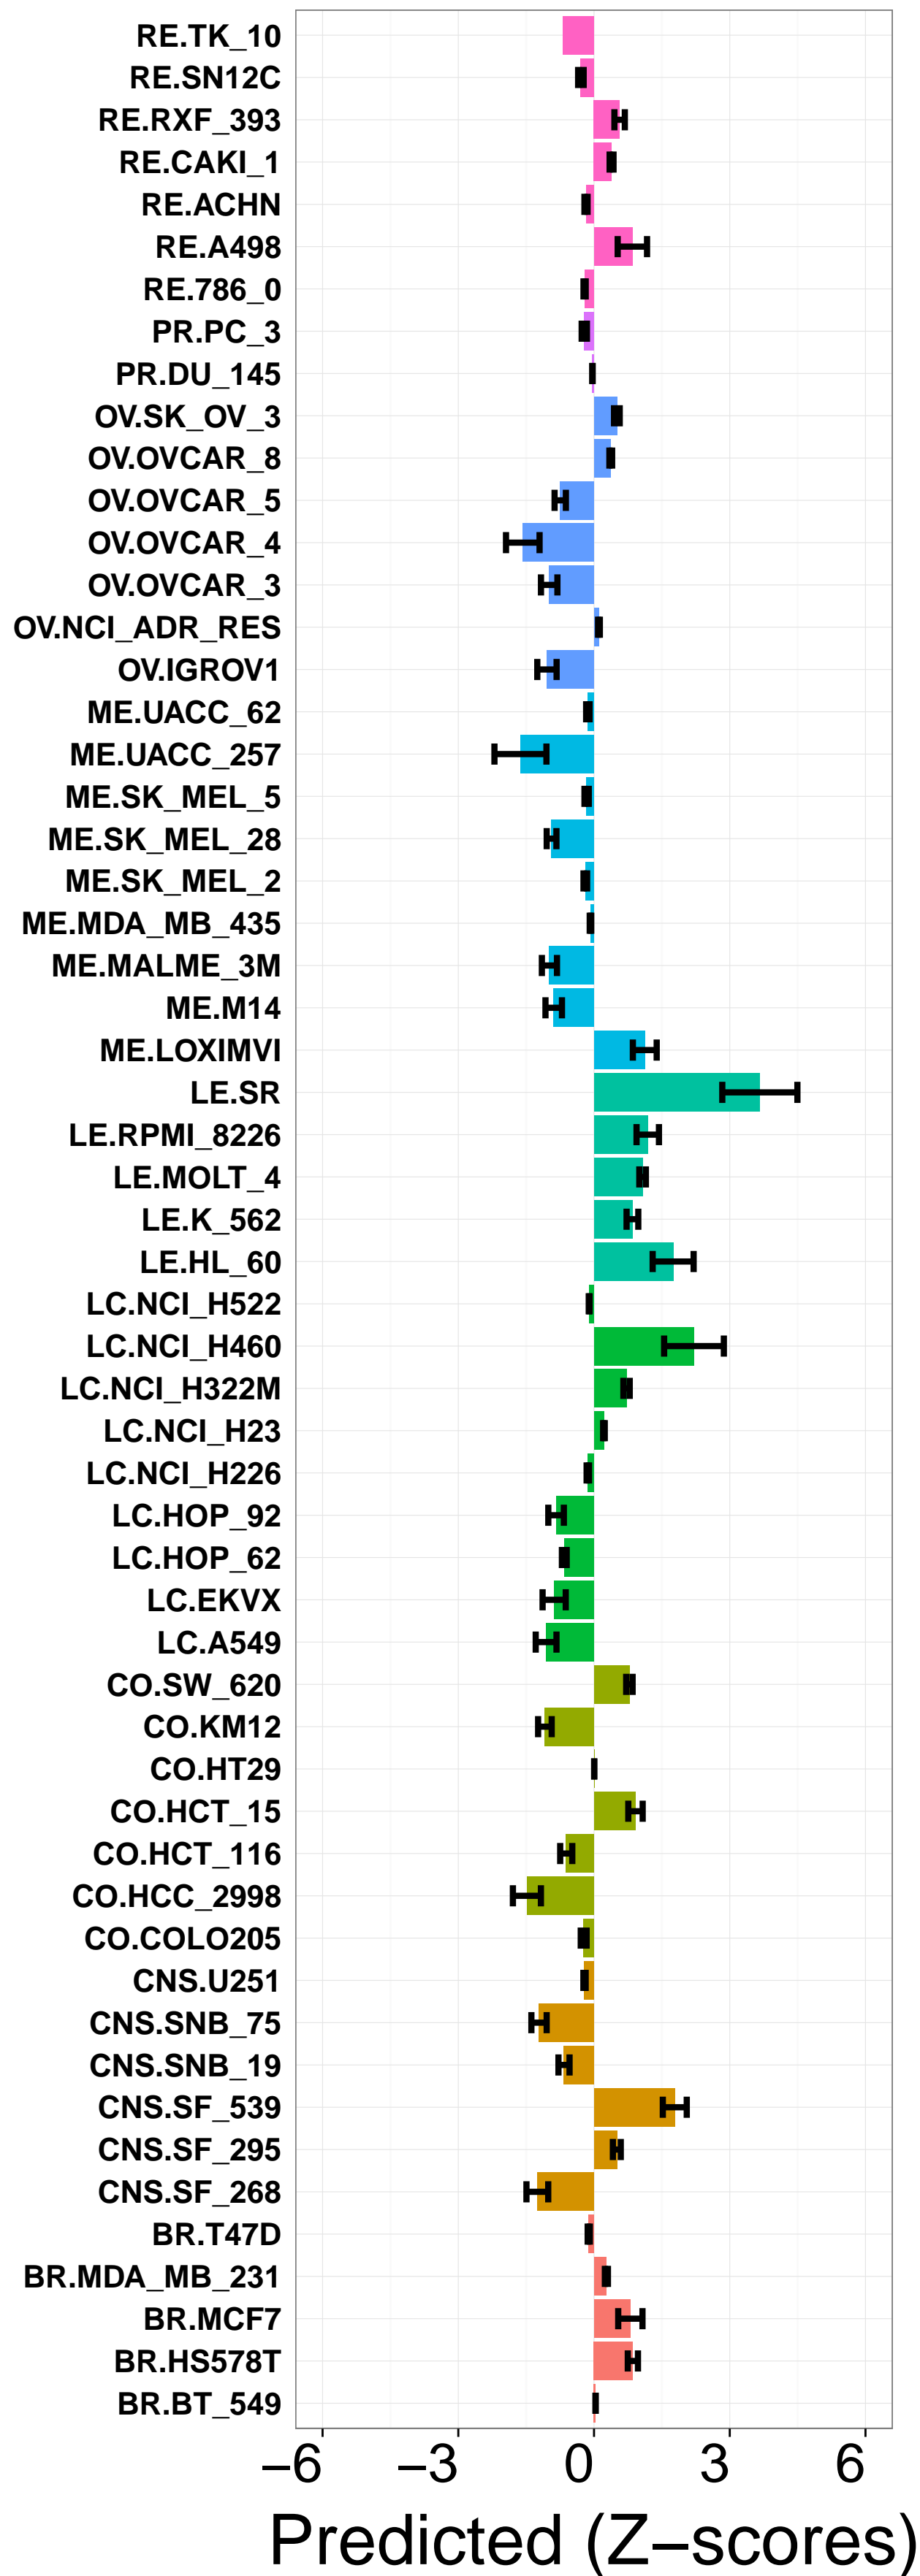

# NSC 707545, Alvespimycin (Interpolation)

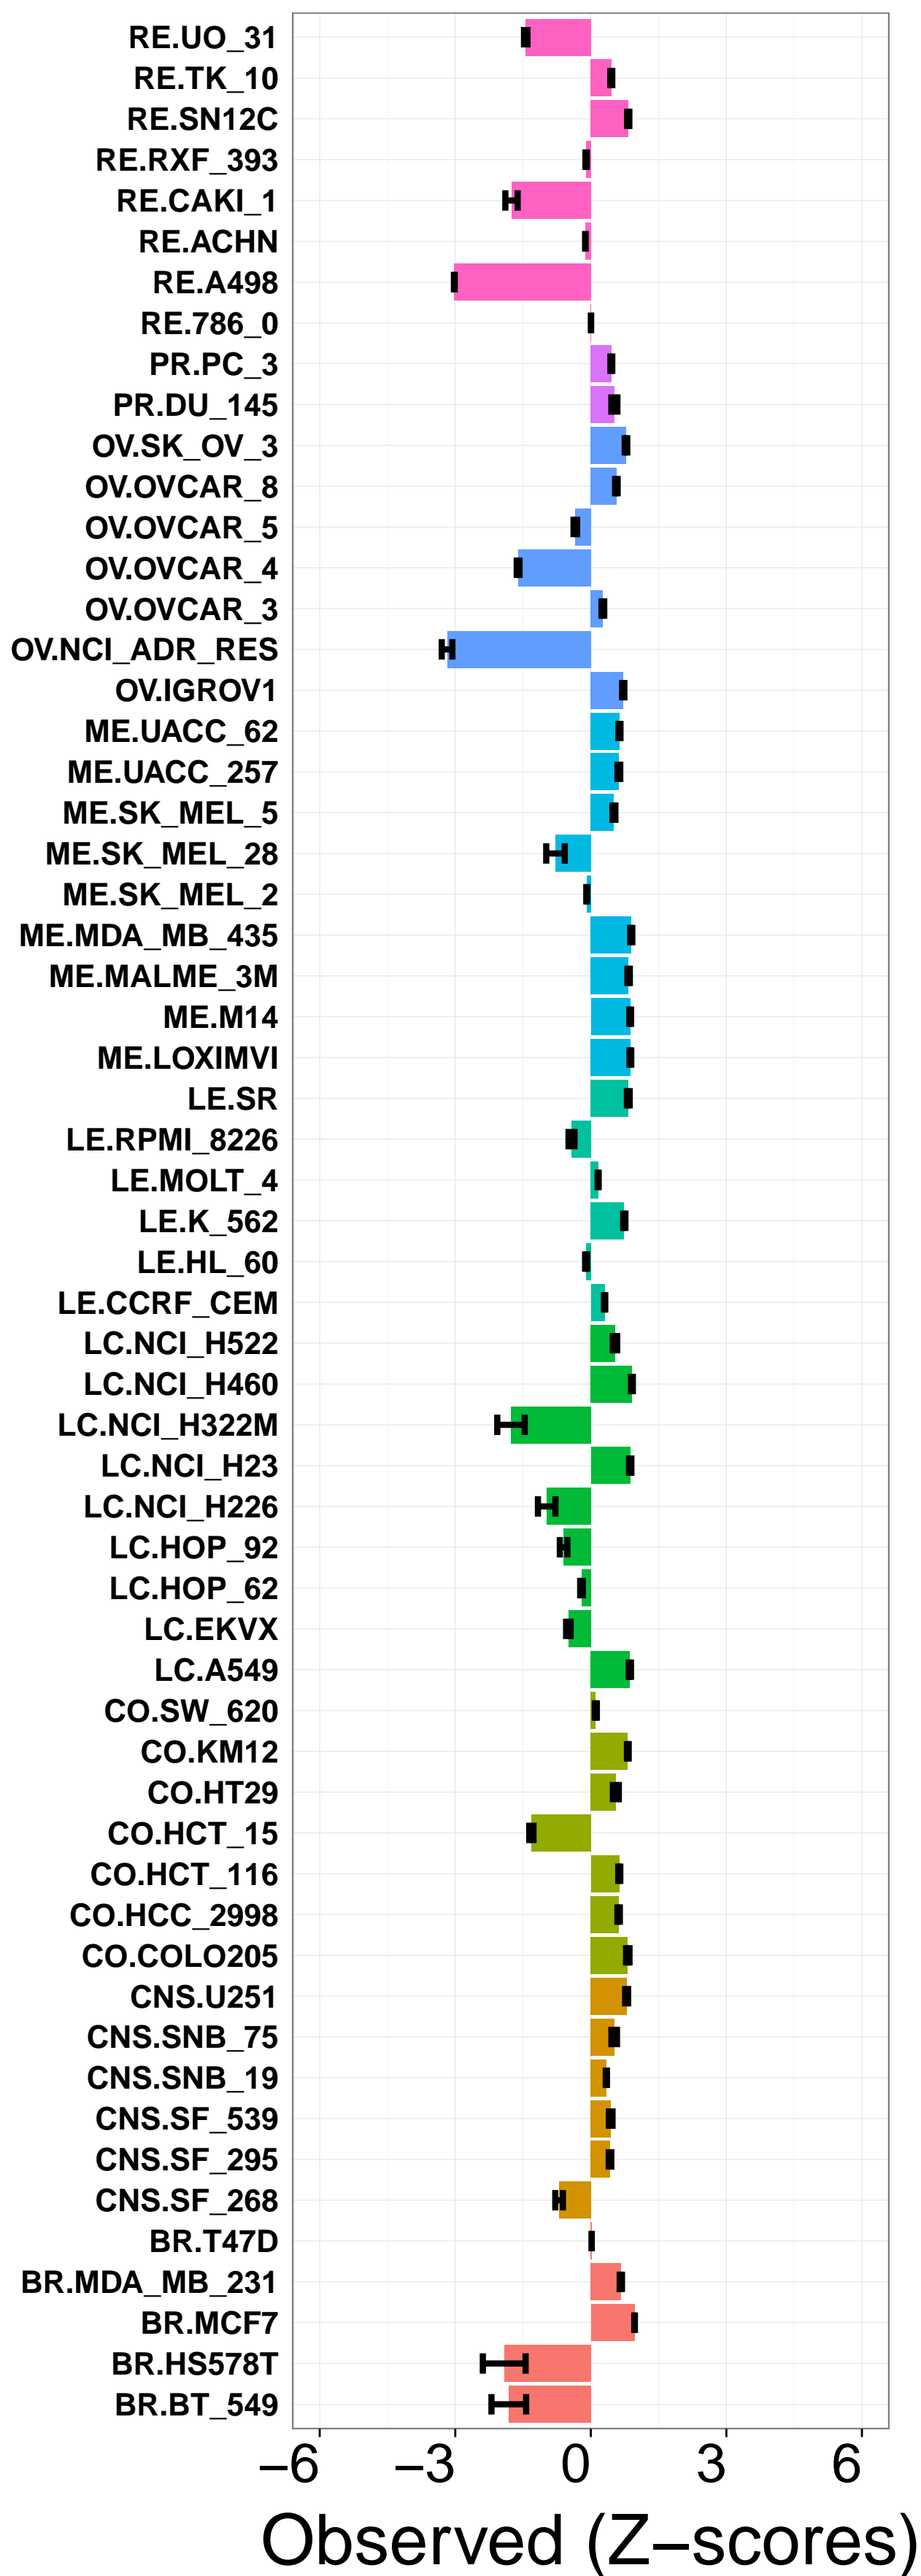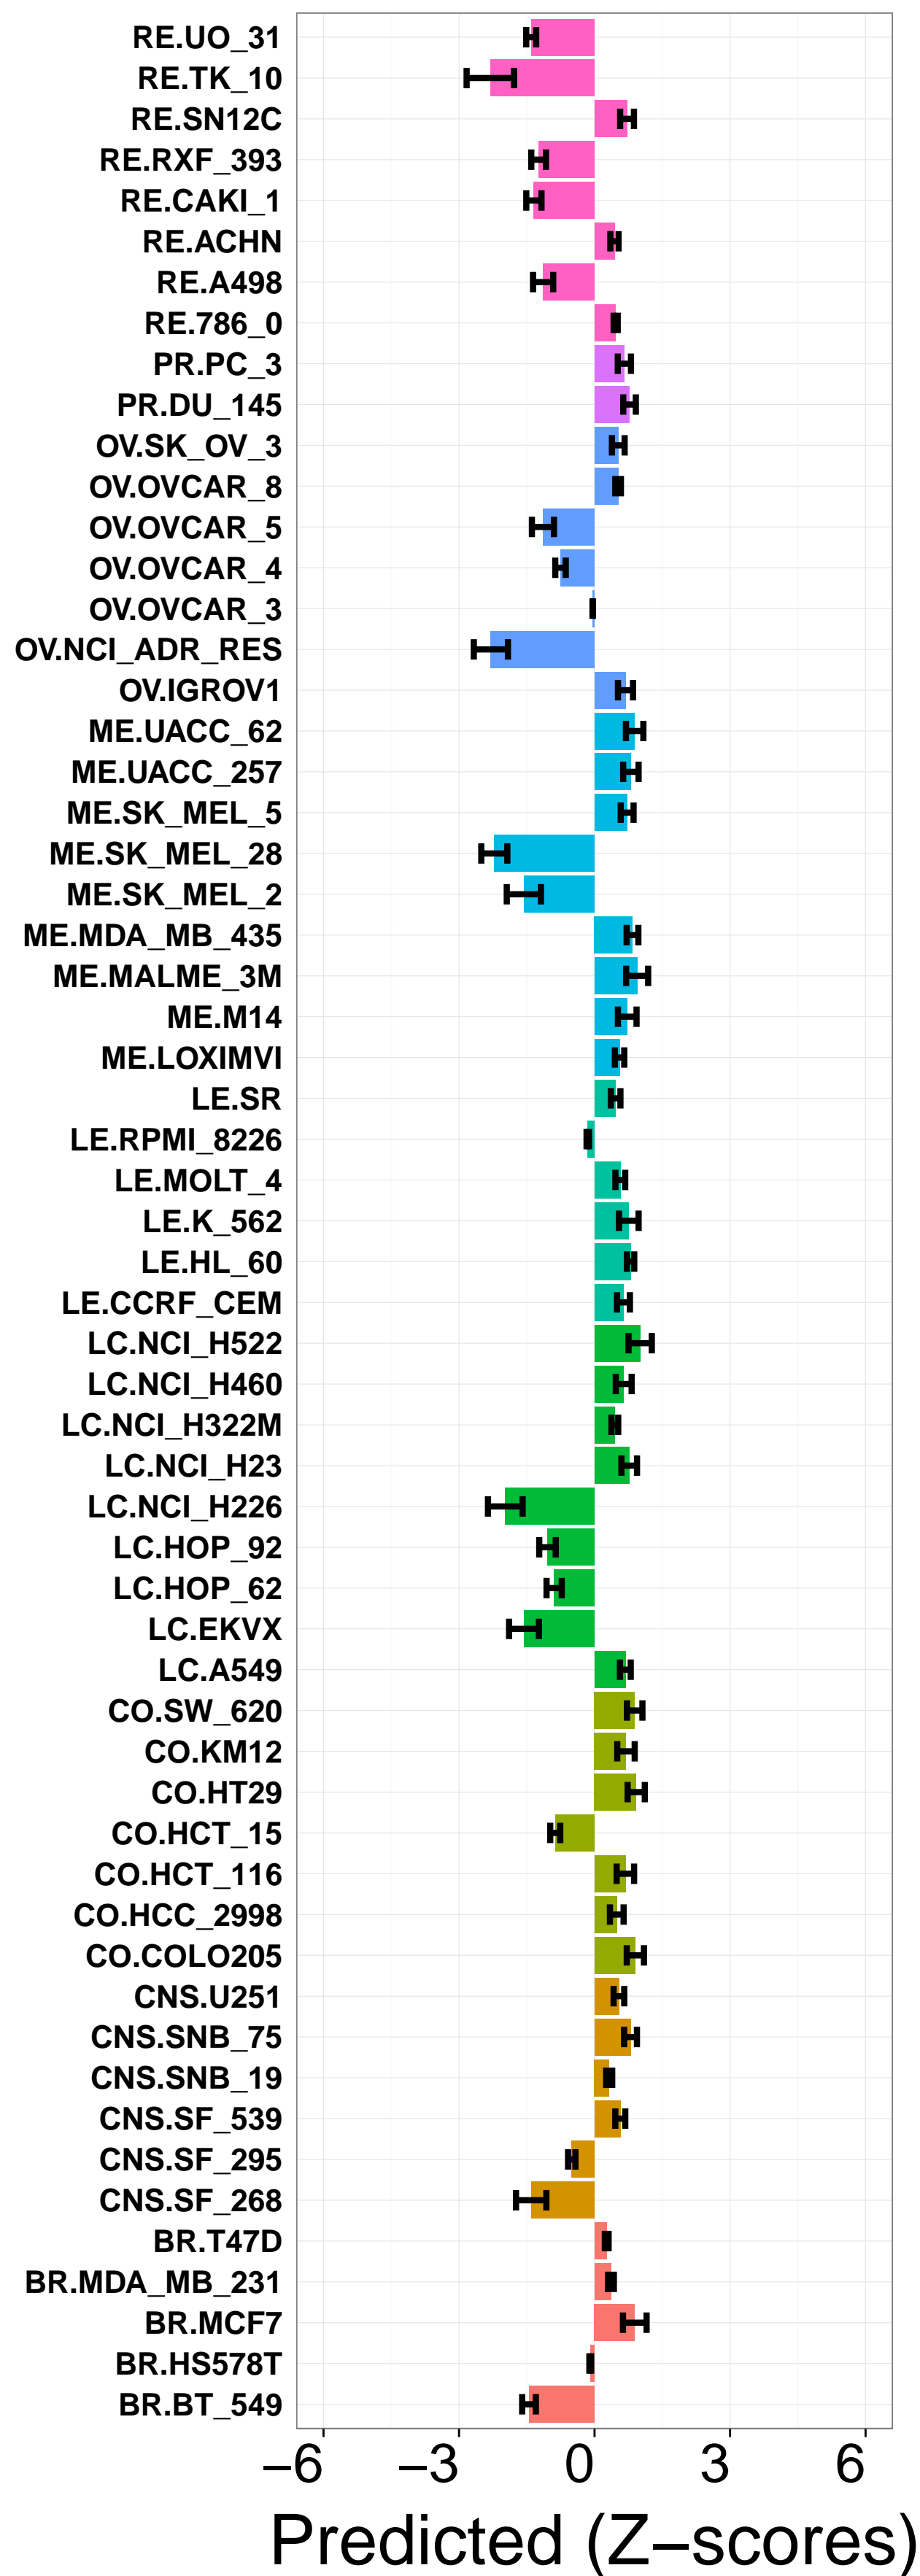

# NSC 710297, OMDPI (Interpolation)

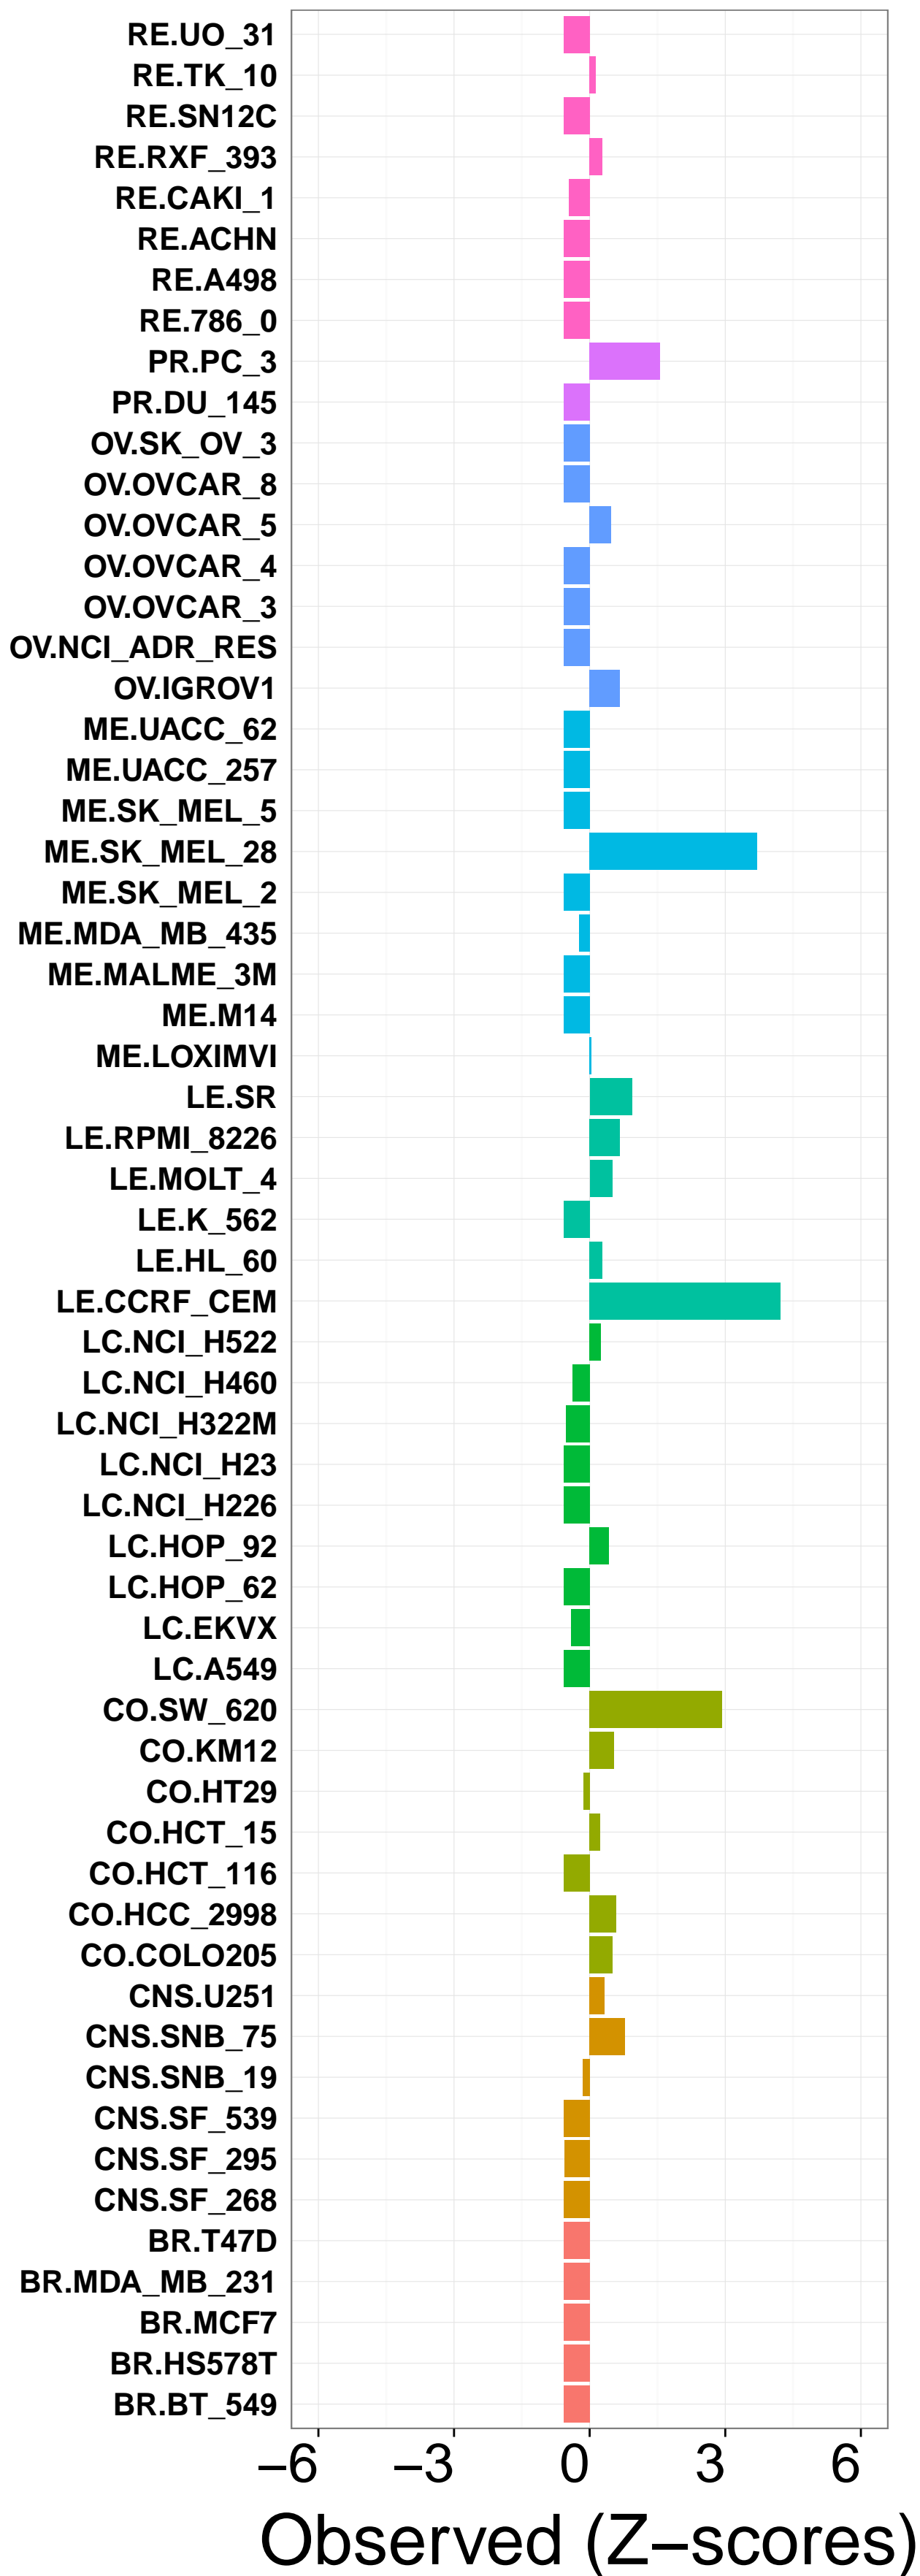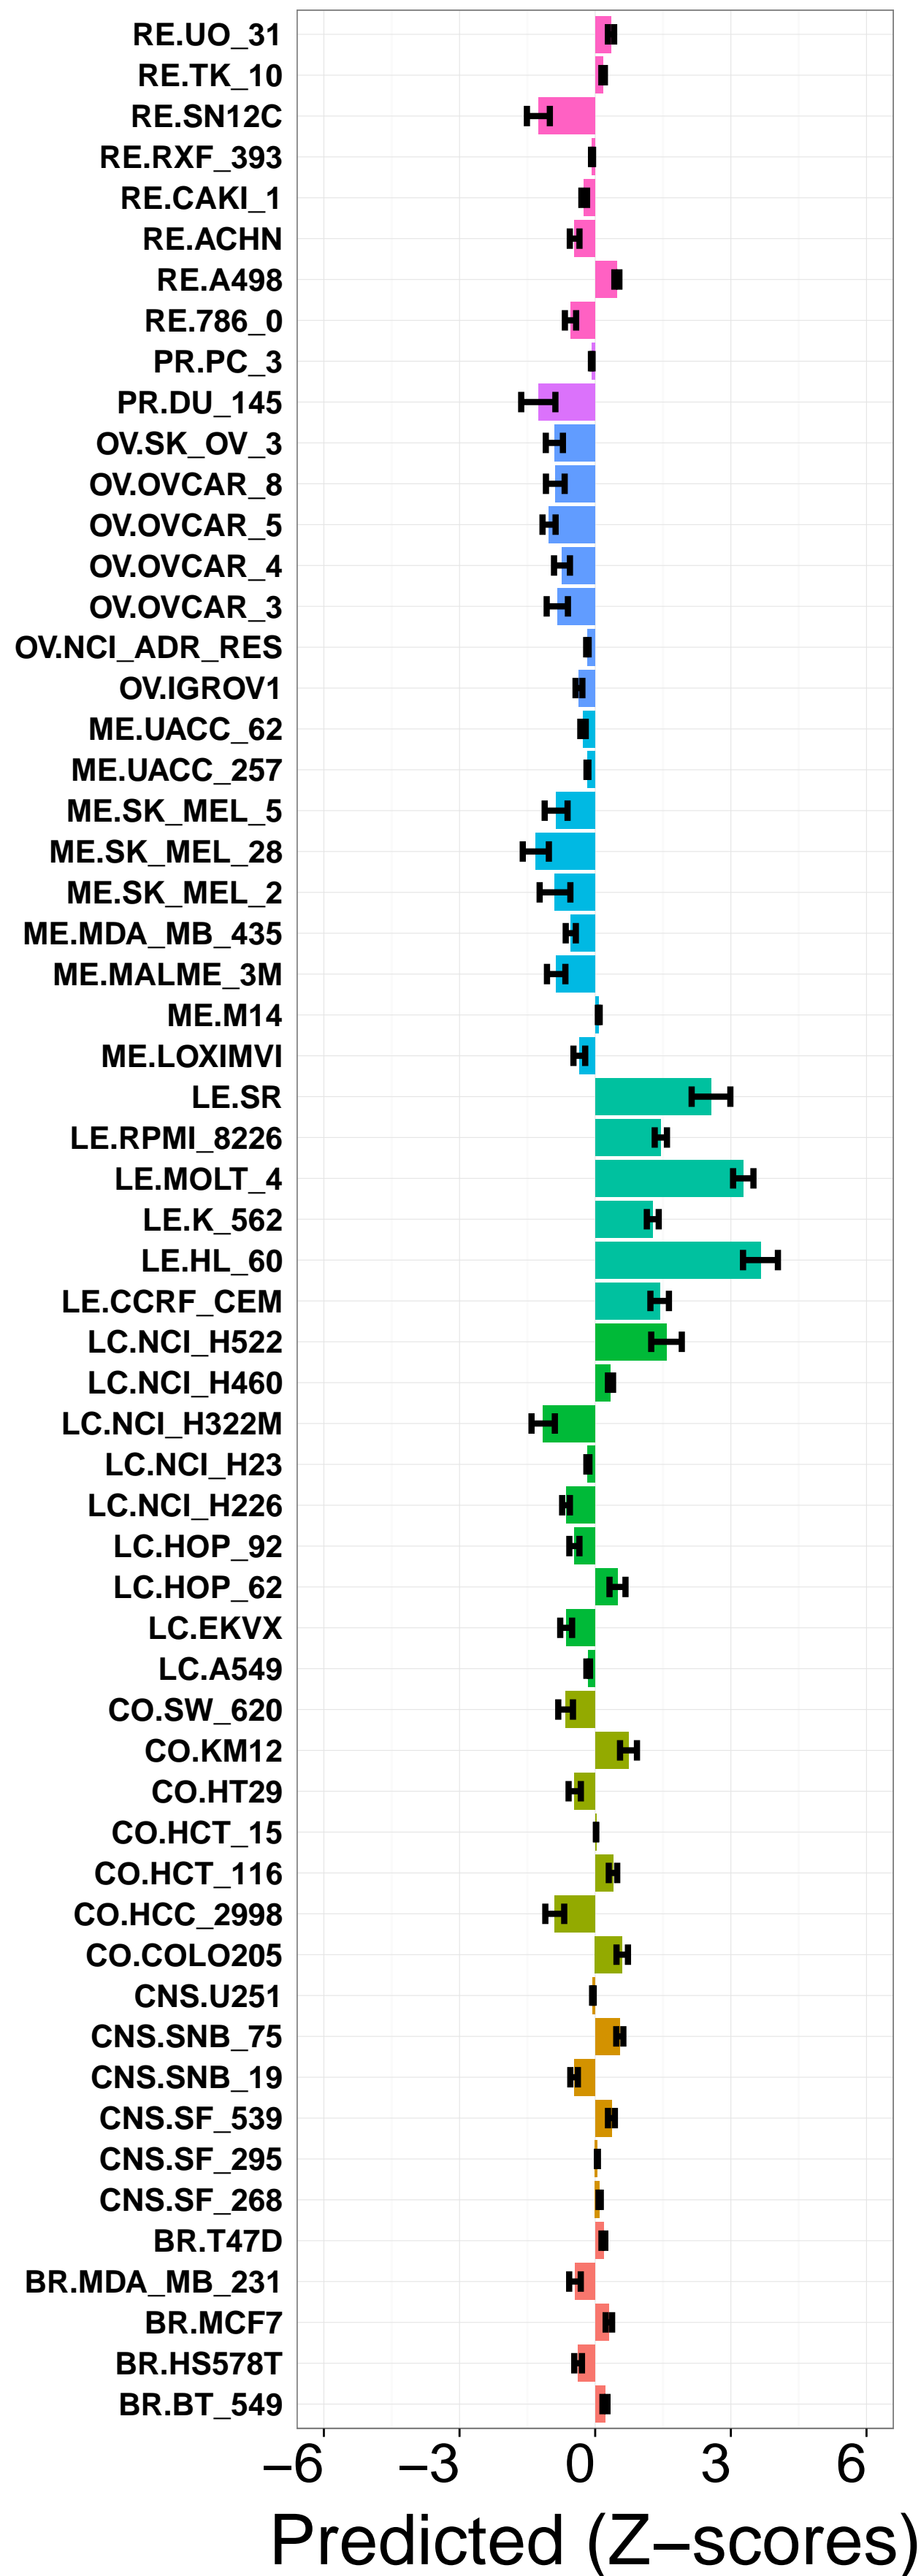

# NSC 710464, (Interpolation)

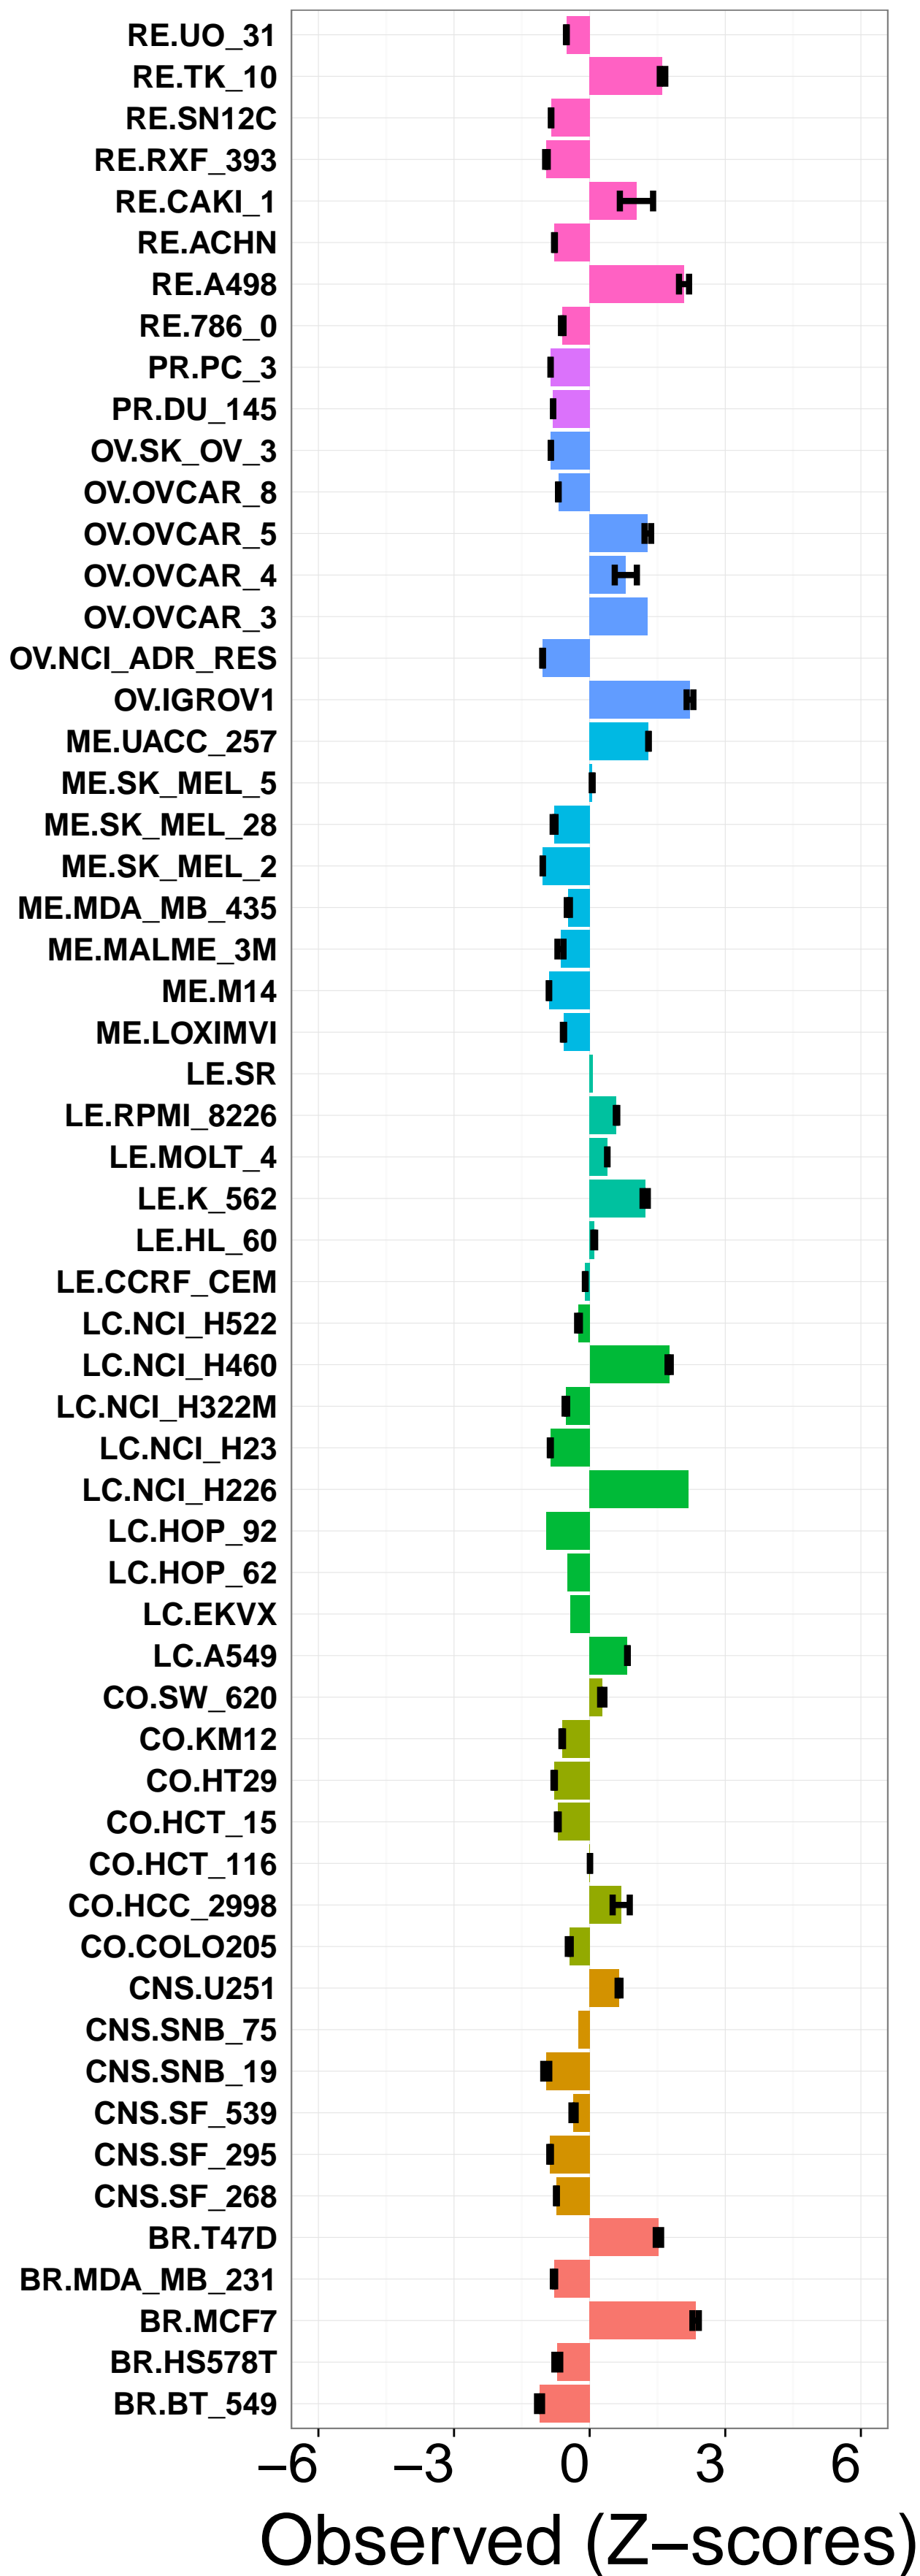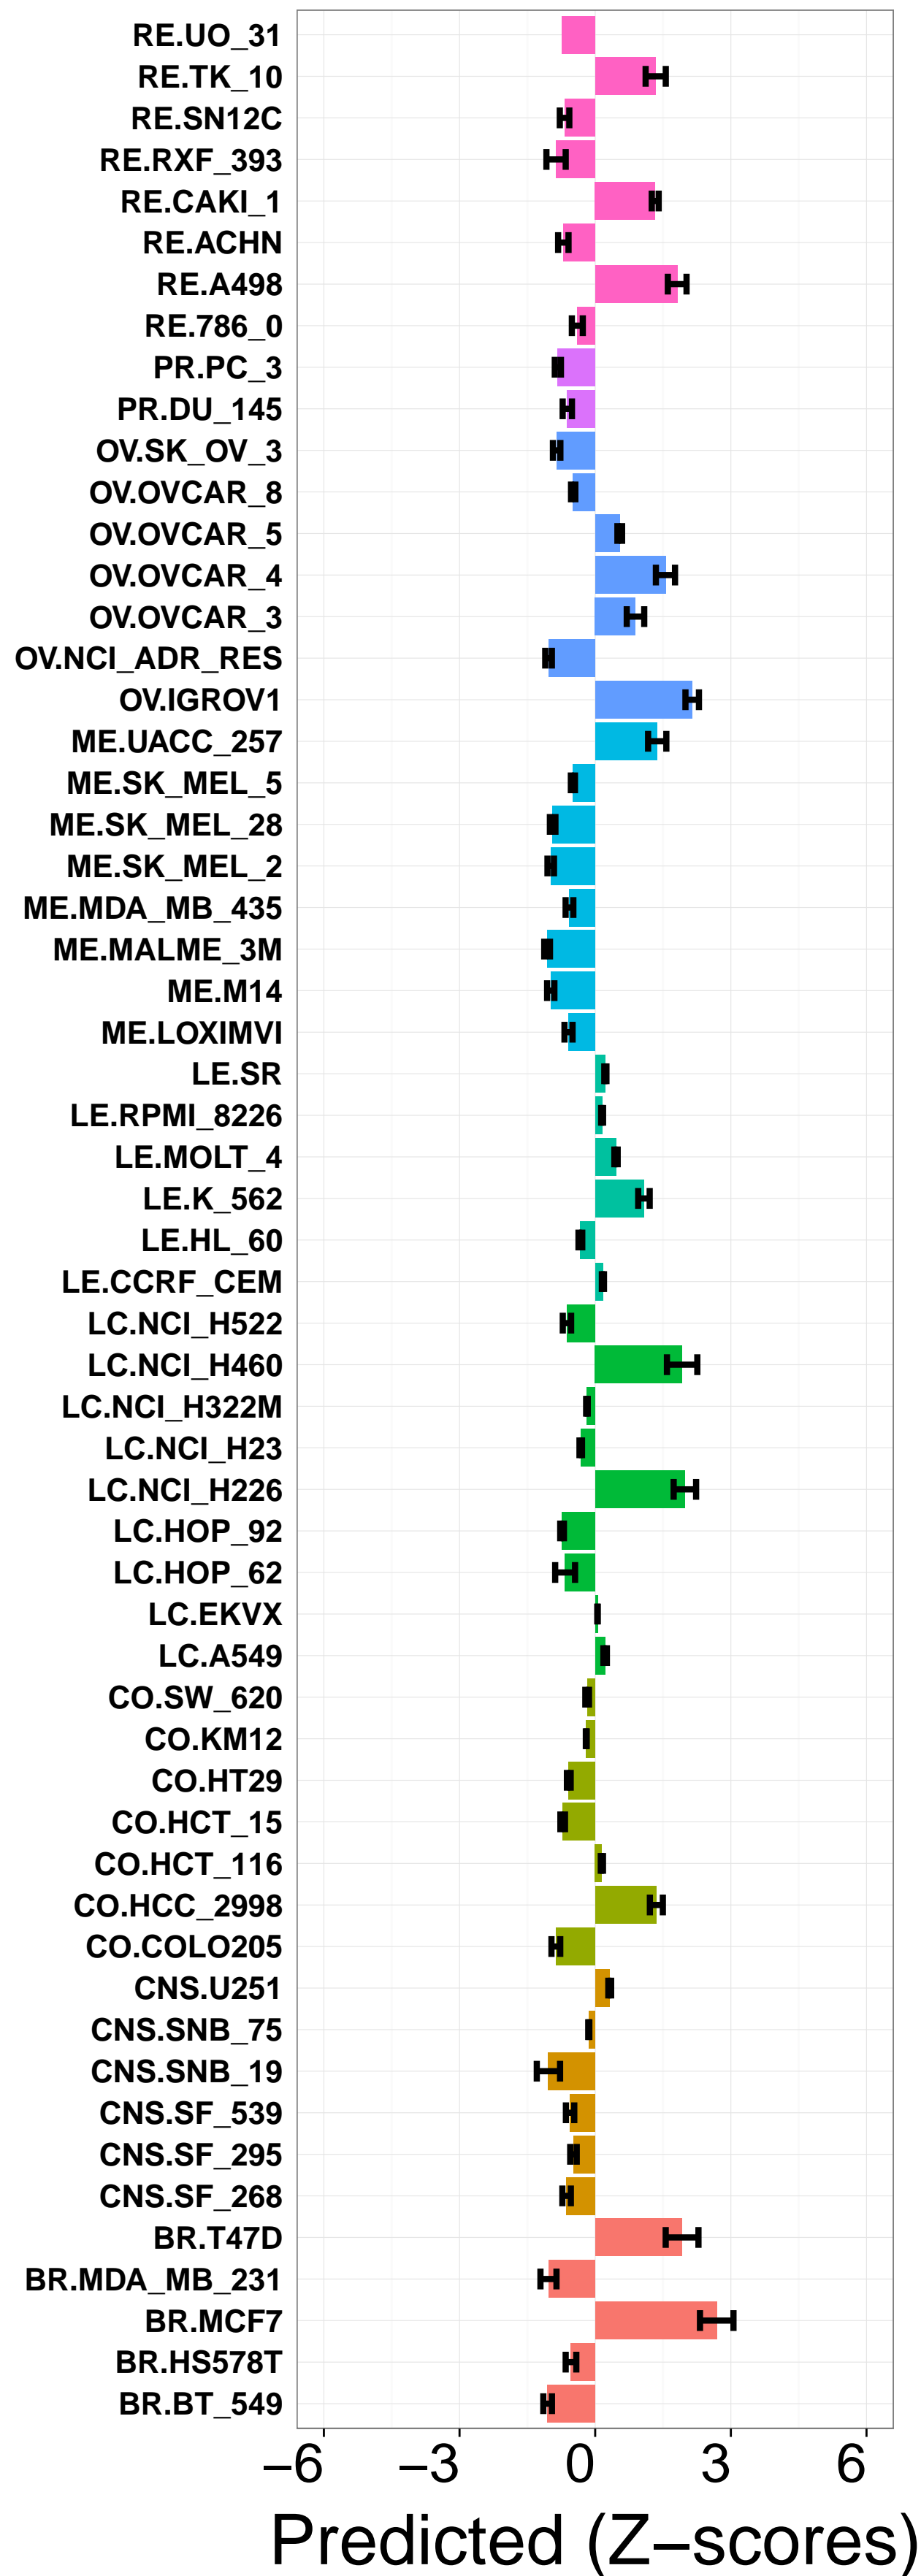

# NSC 715055, Gefitinib (Interpolation)

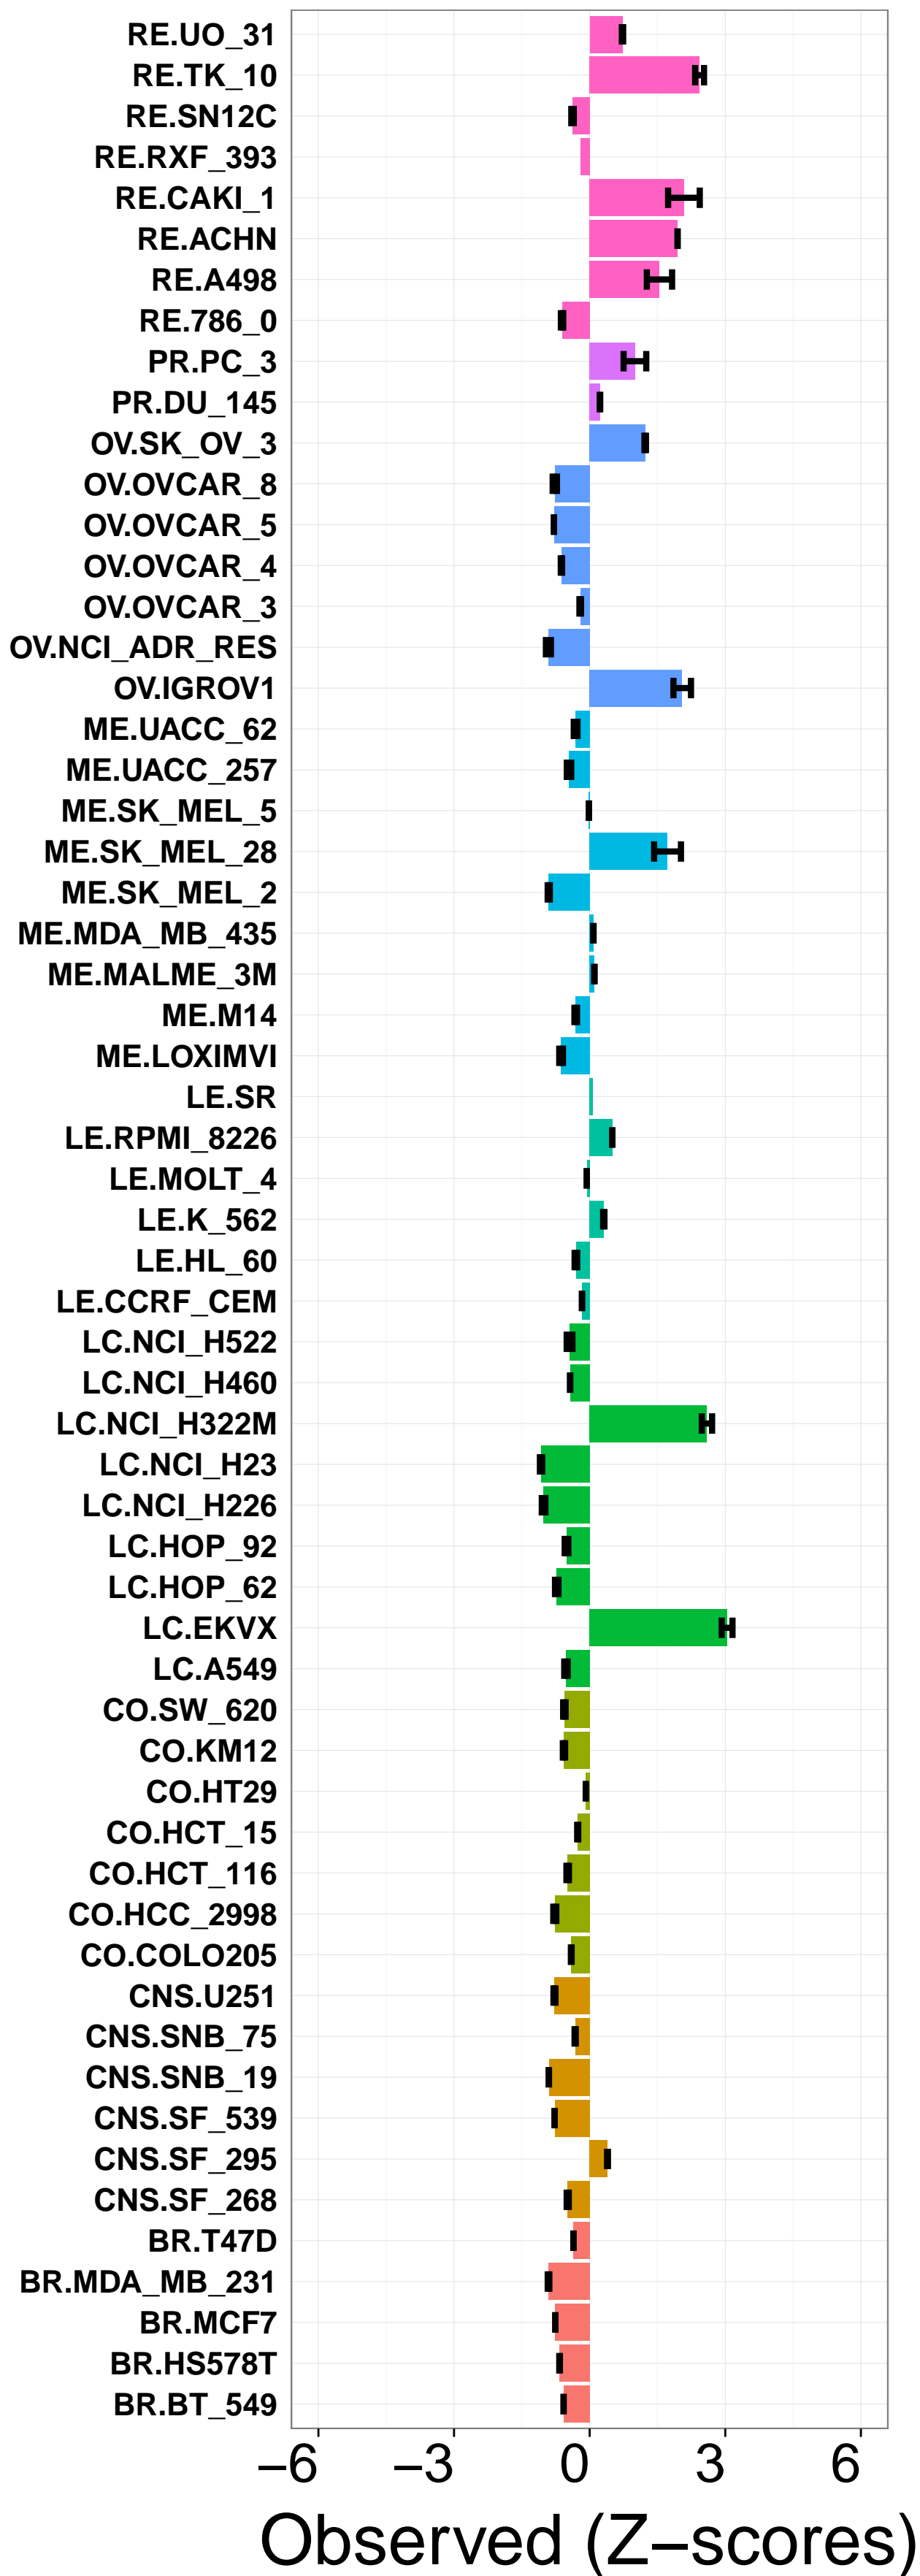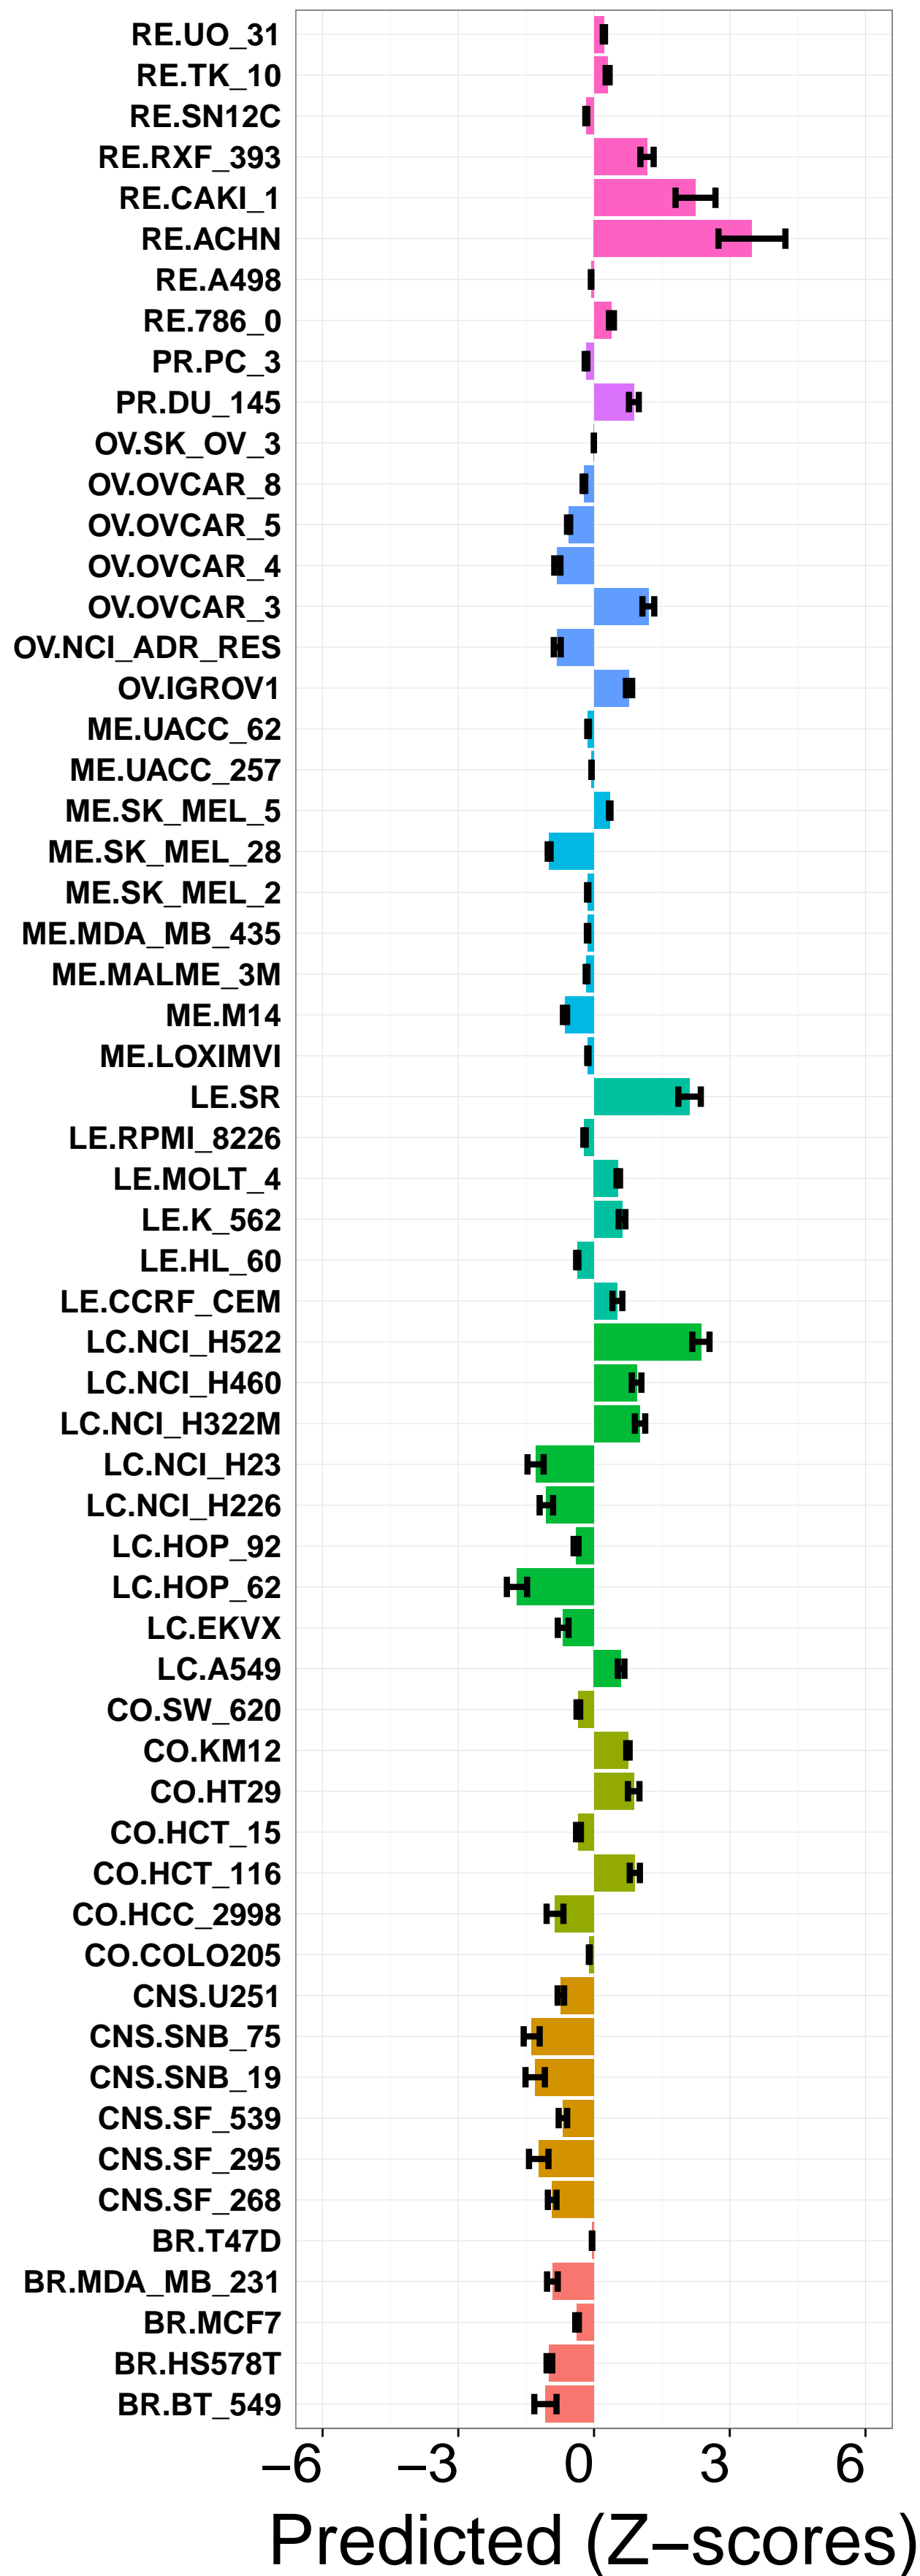



# NSC 718781, (Interpolation)

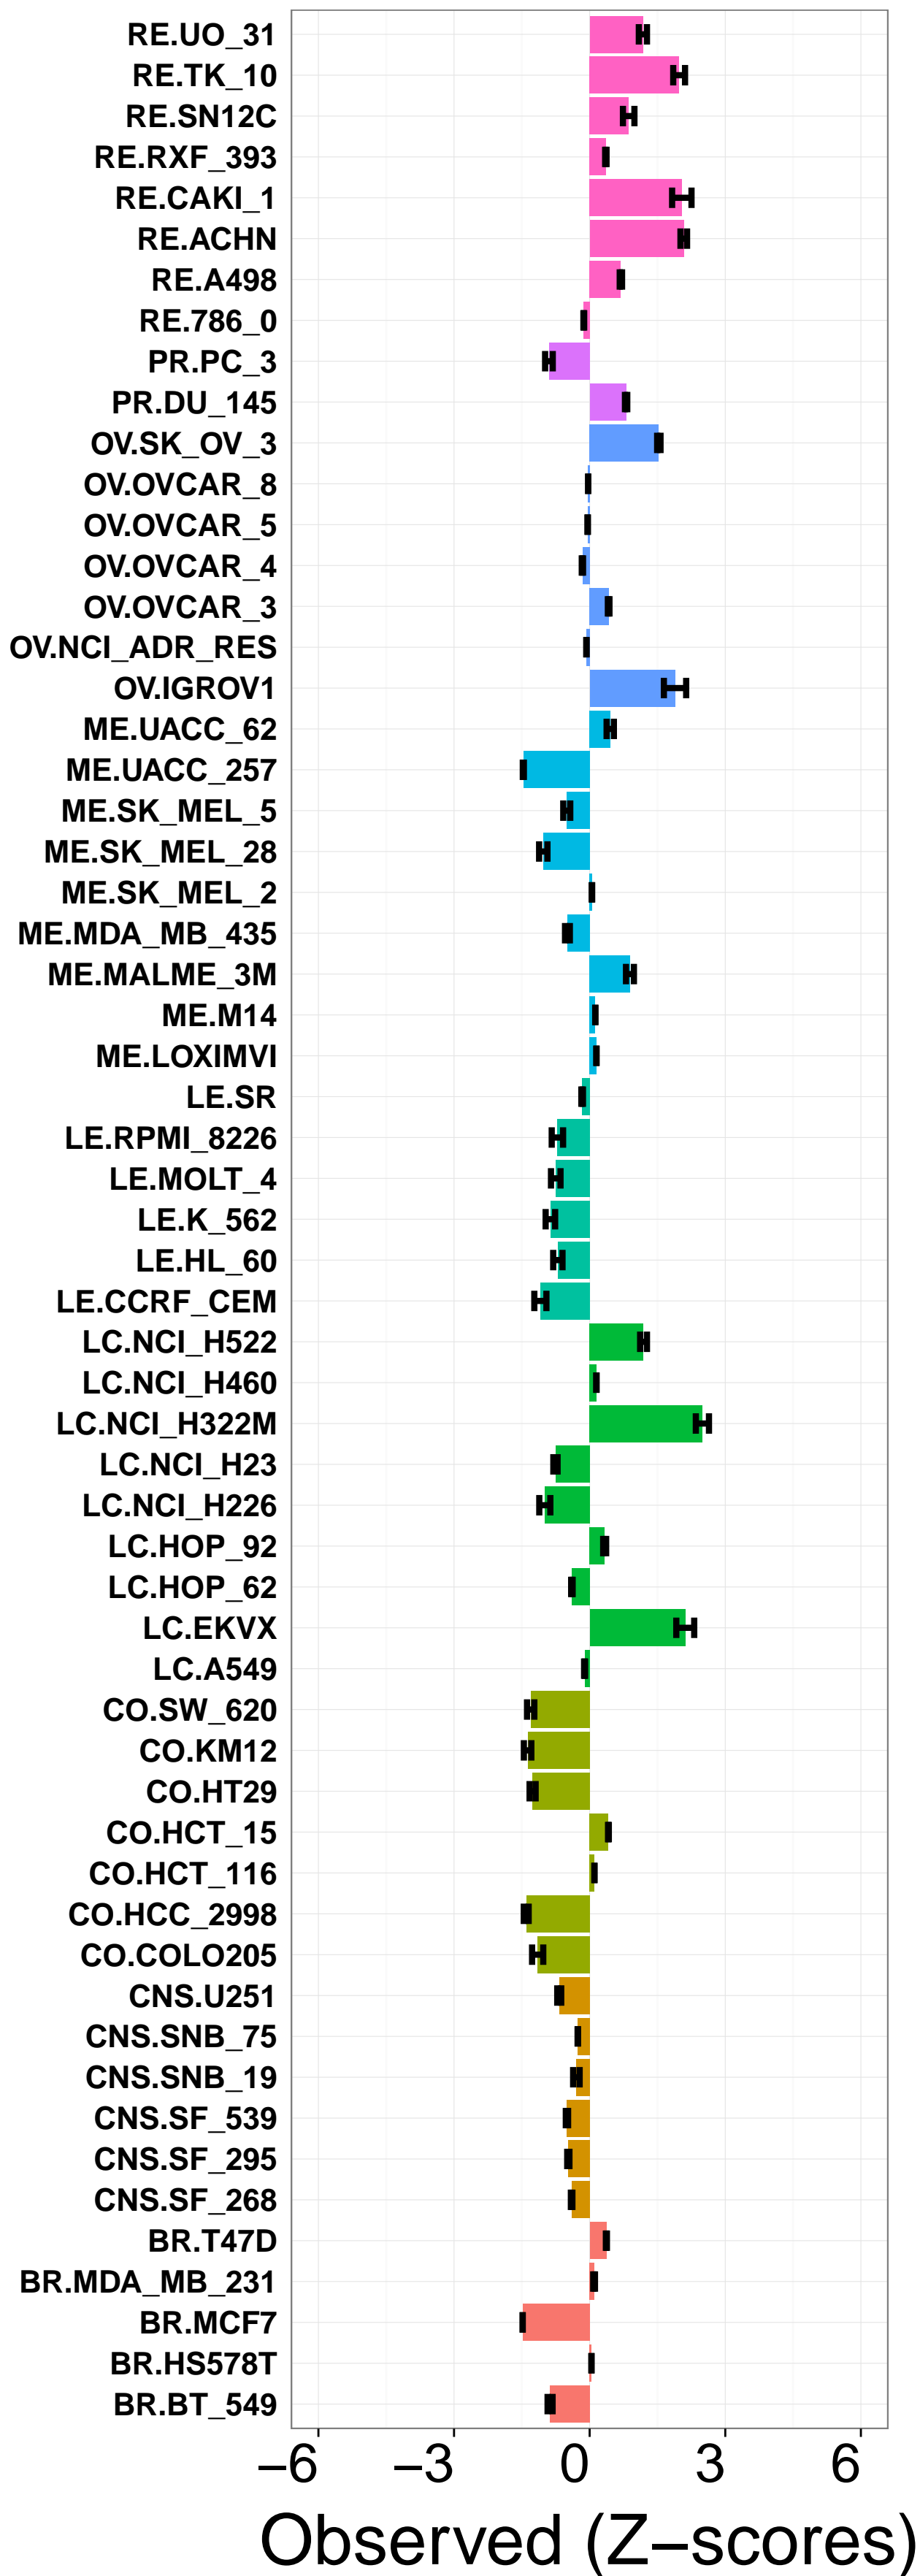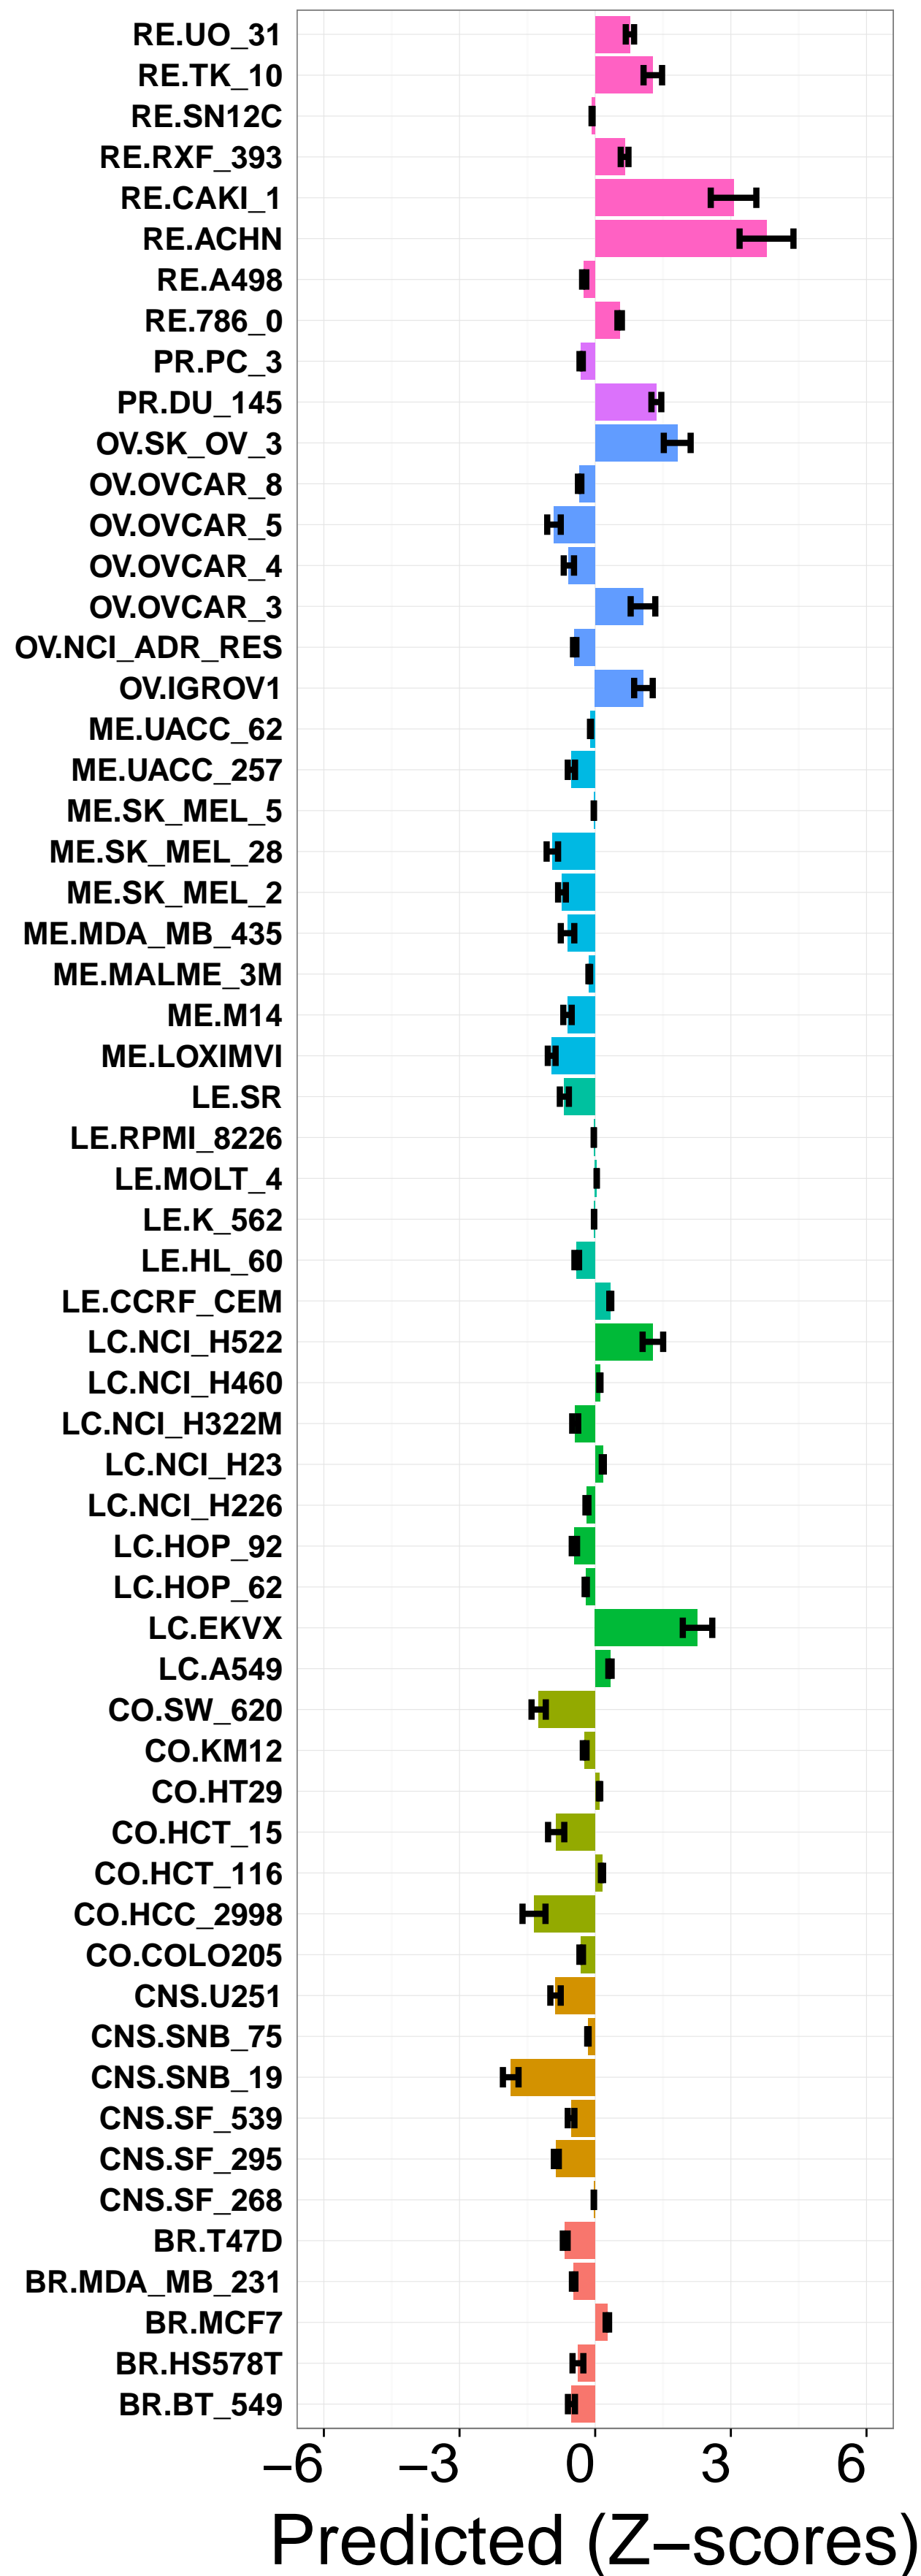

# NSC 719239, (Interpolation)

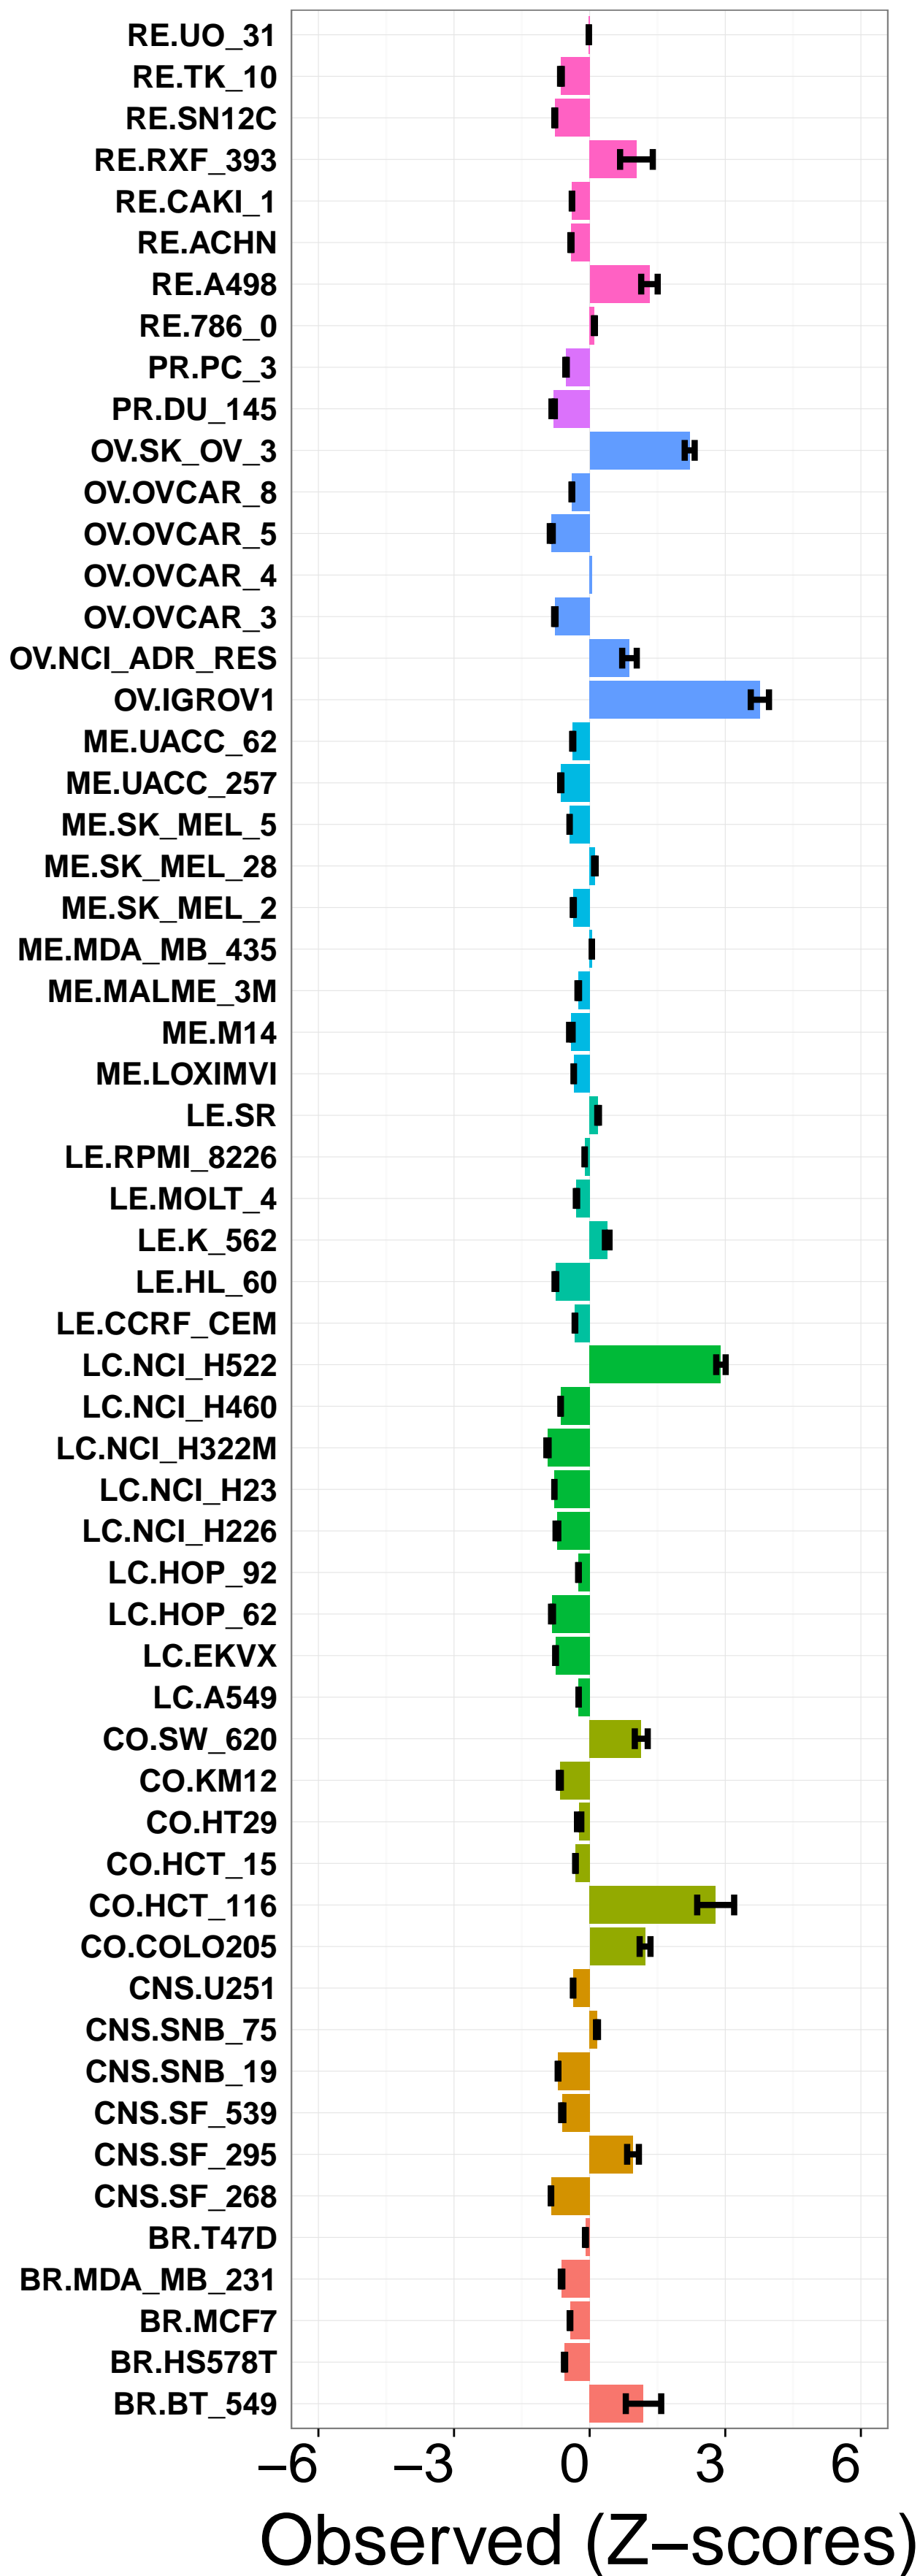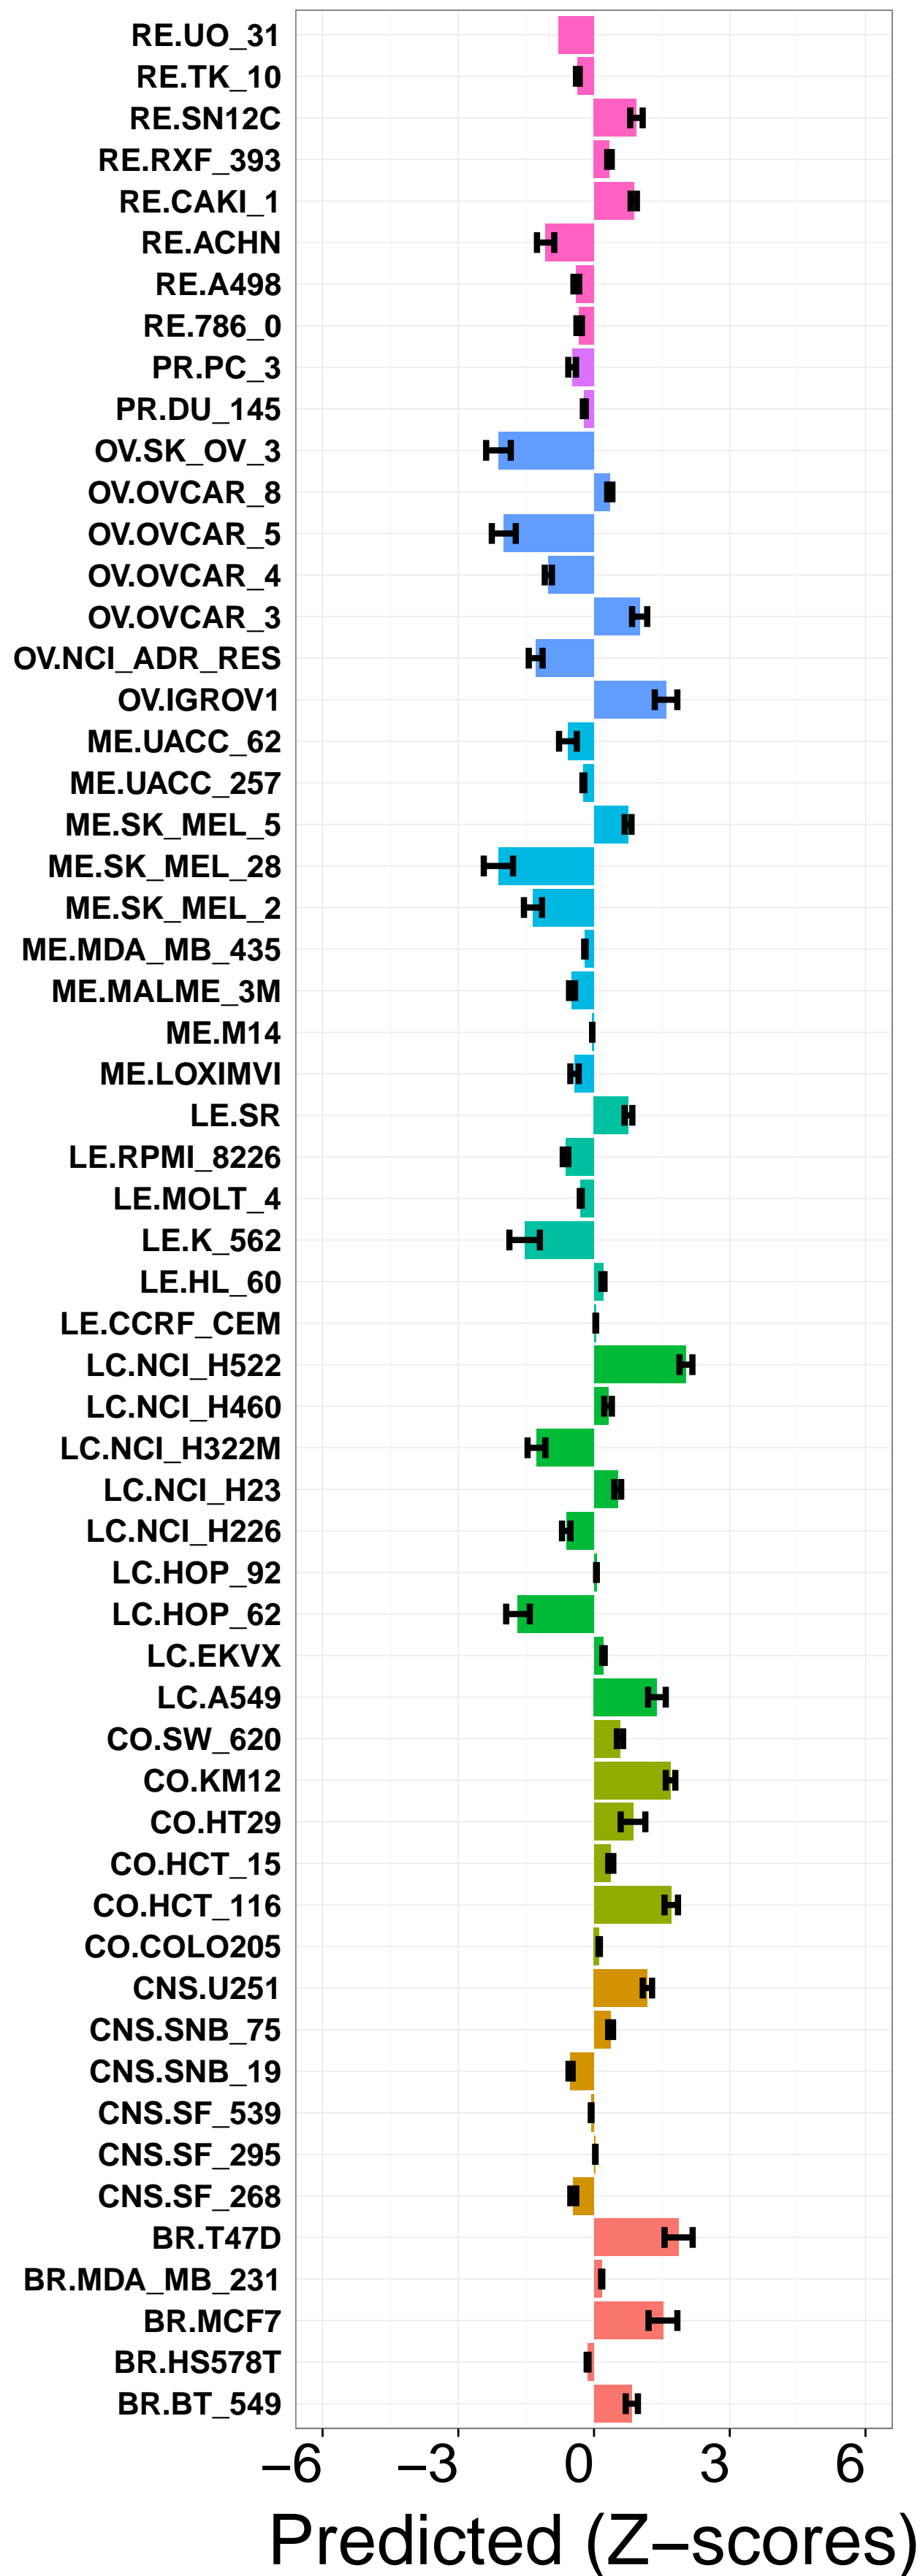

# NSC 724998, (Interpolation)

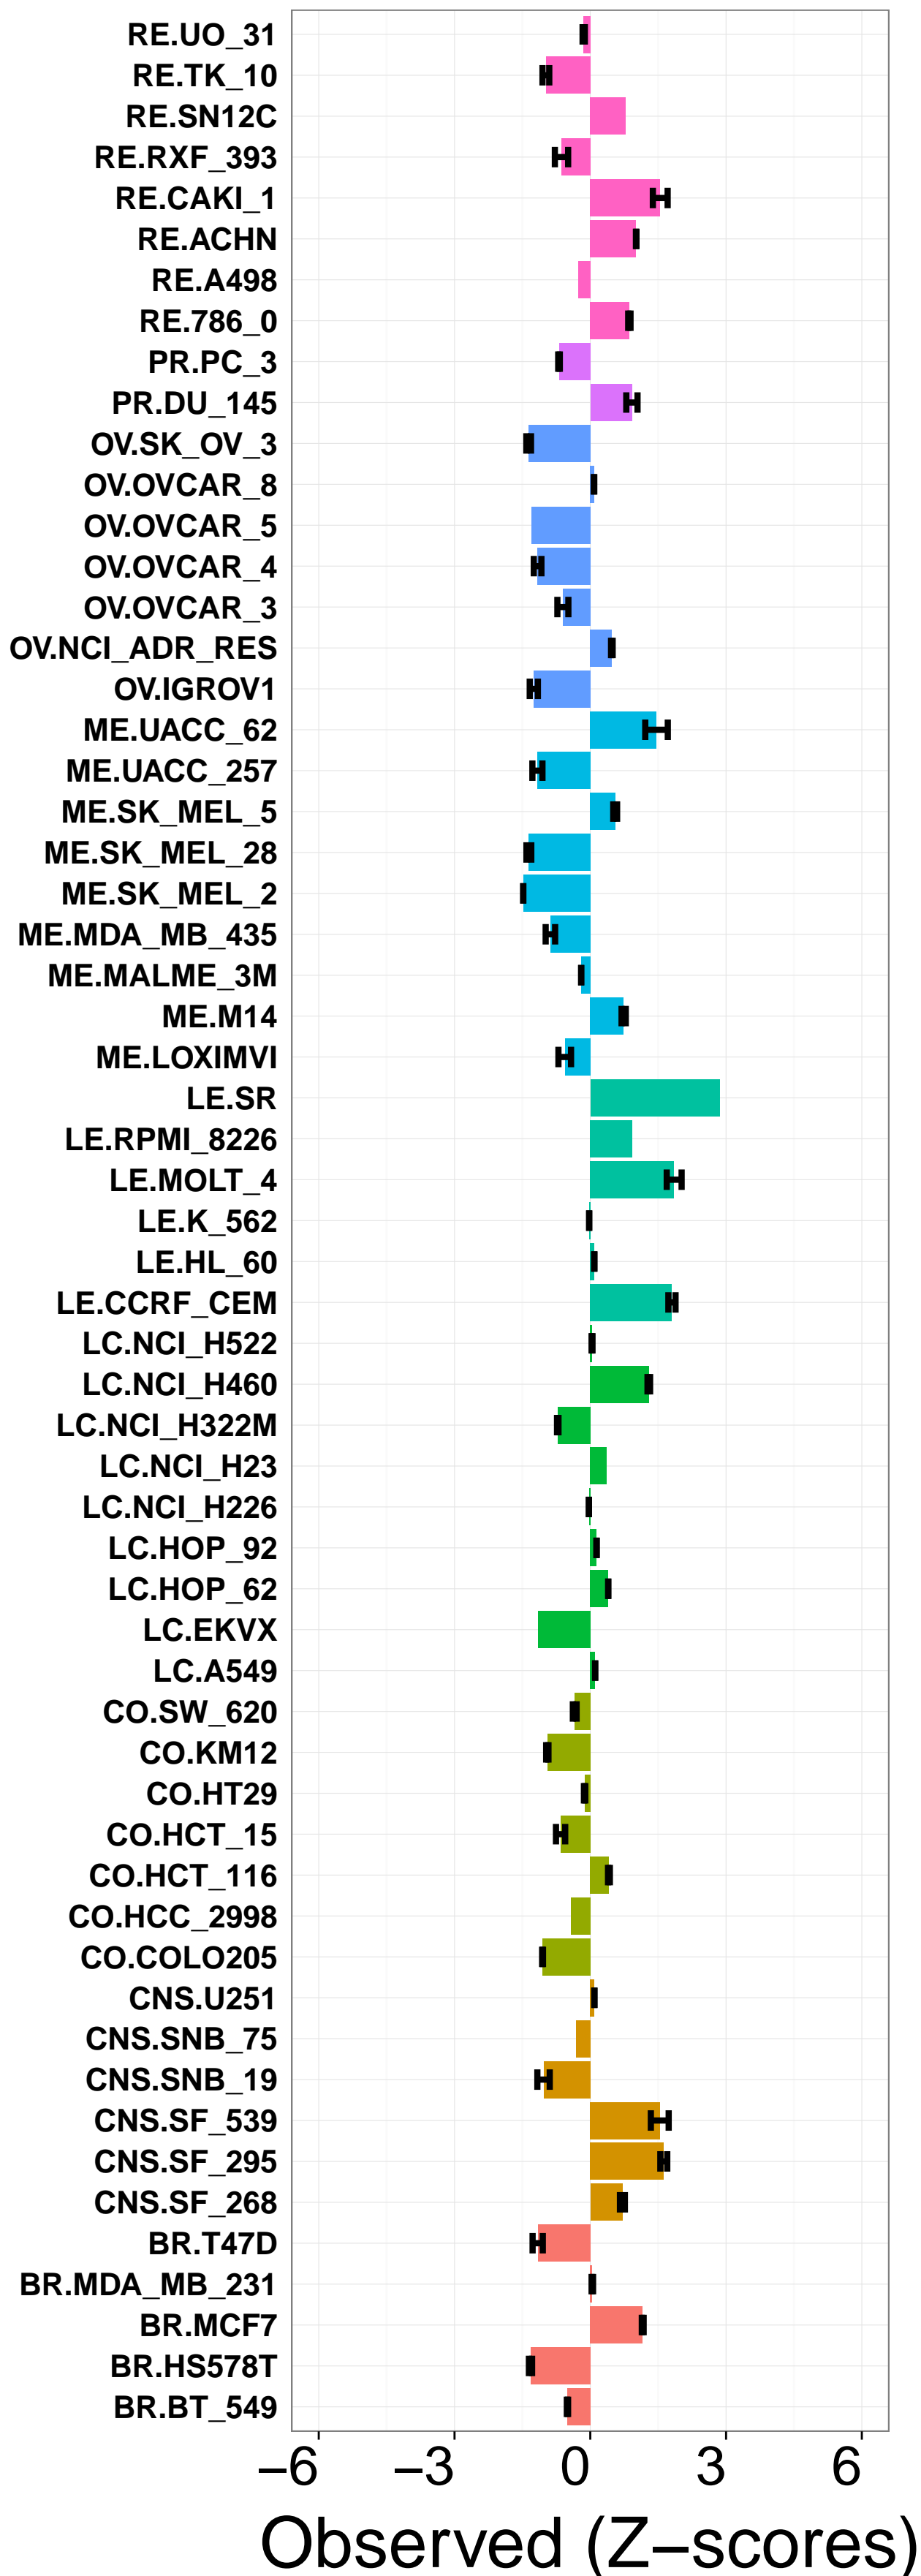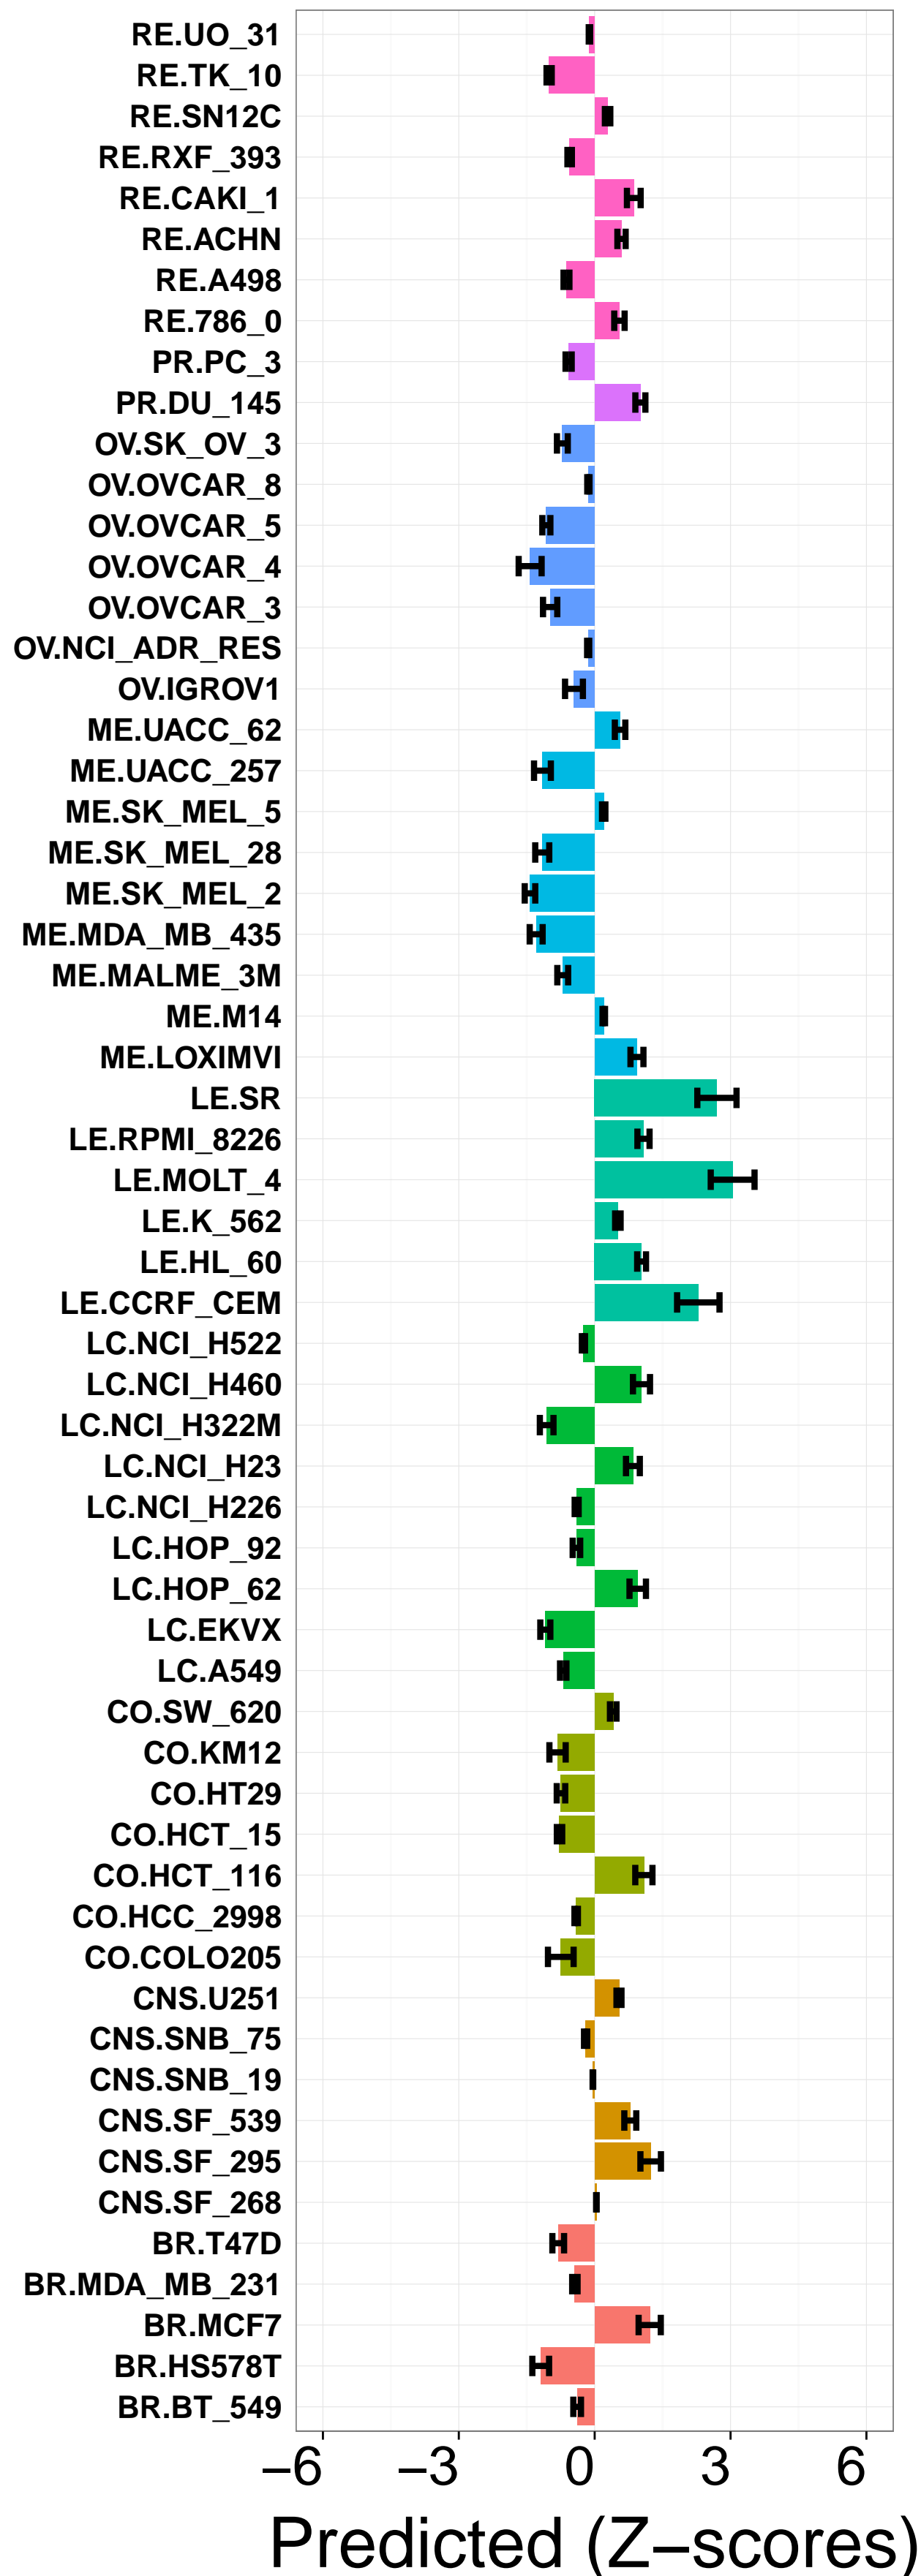

# NSC 725776, (Interpolation)

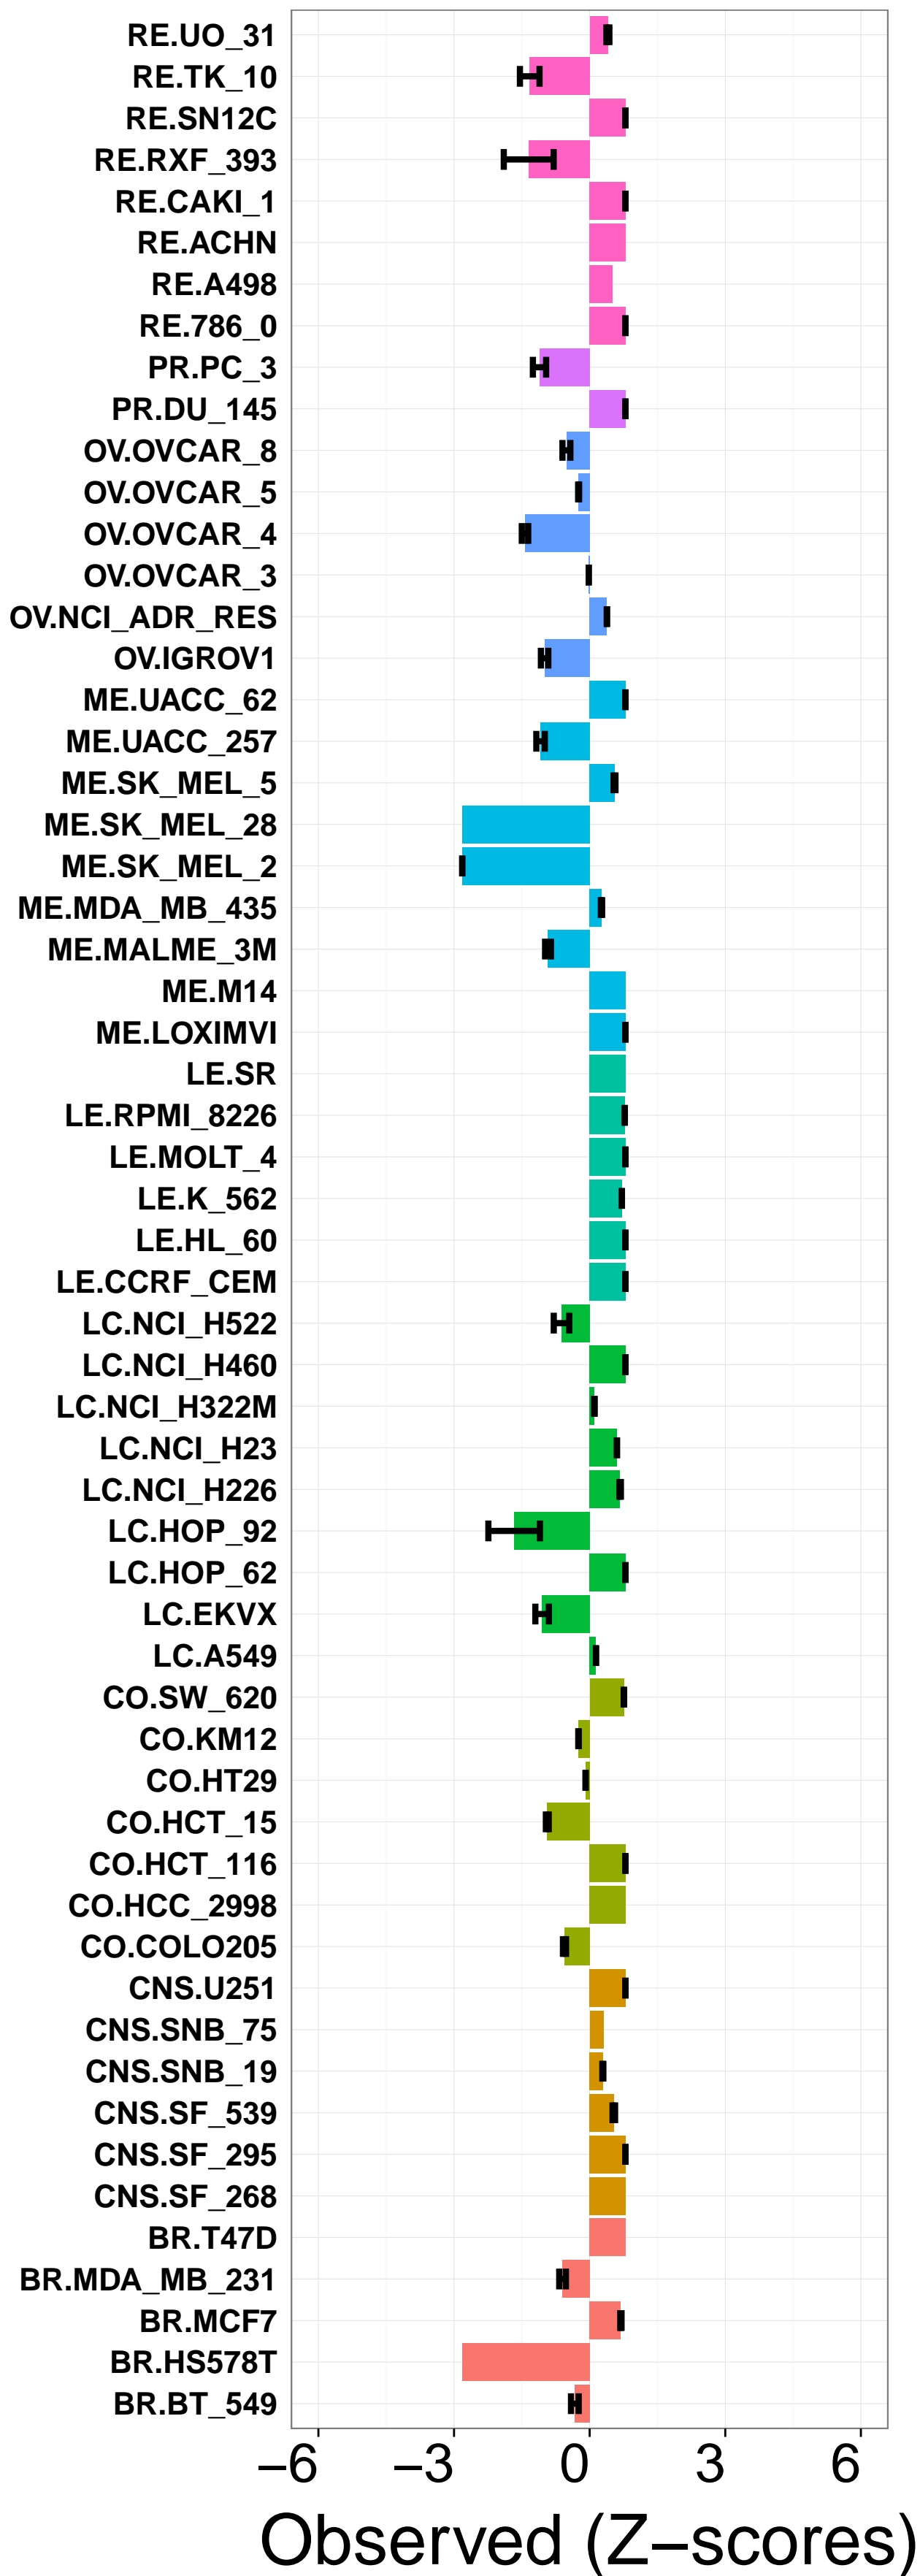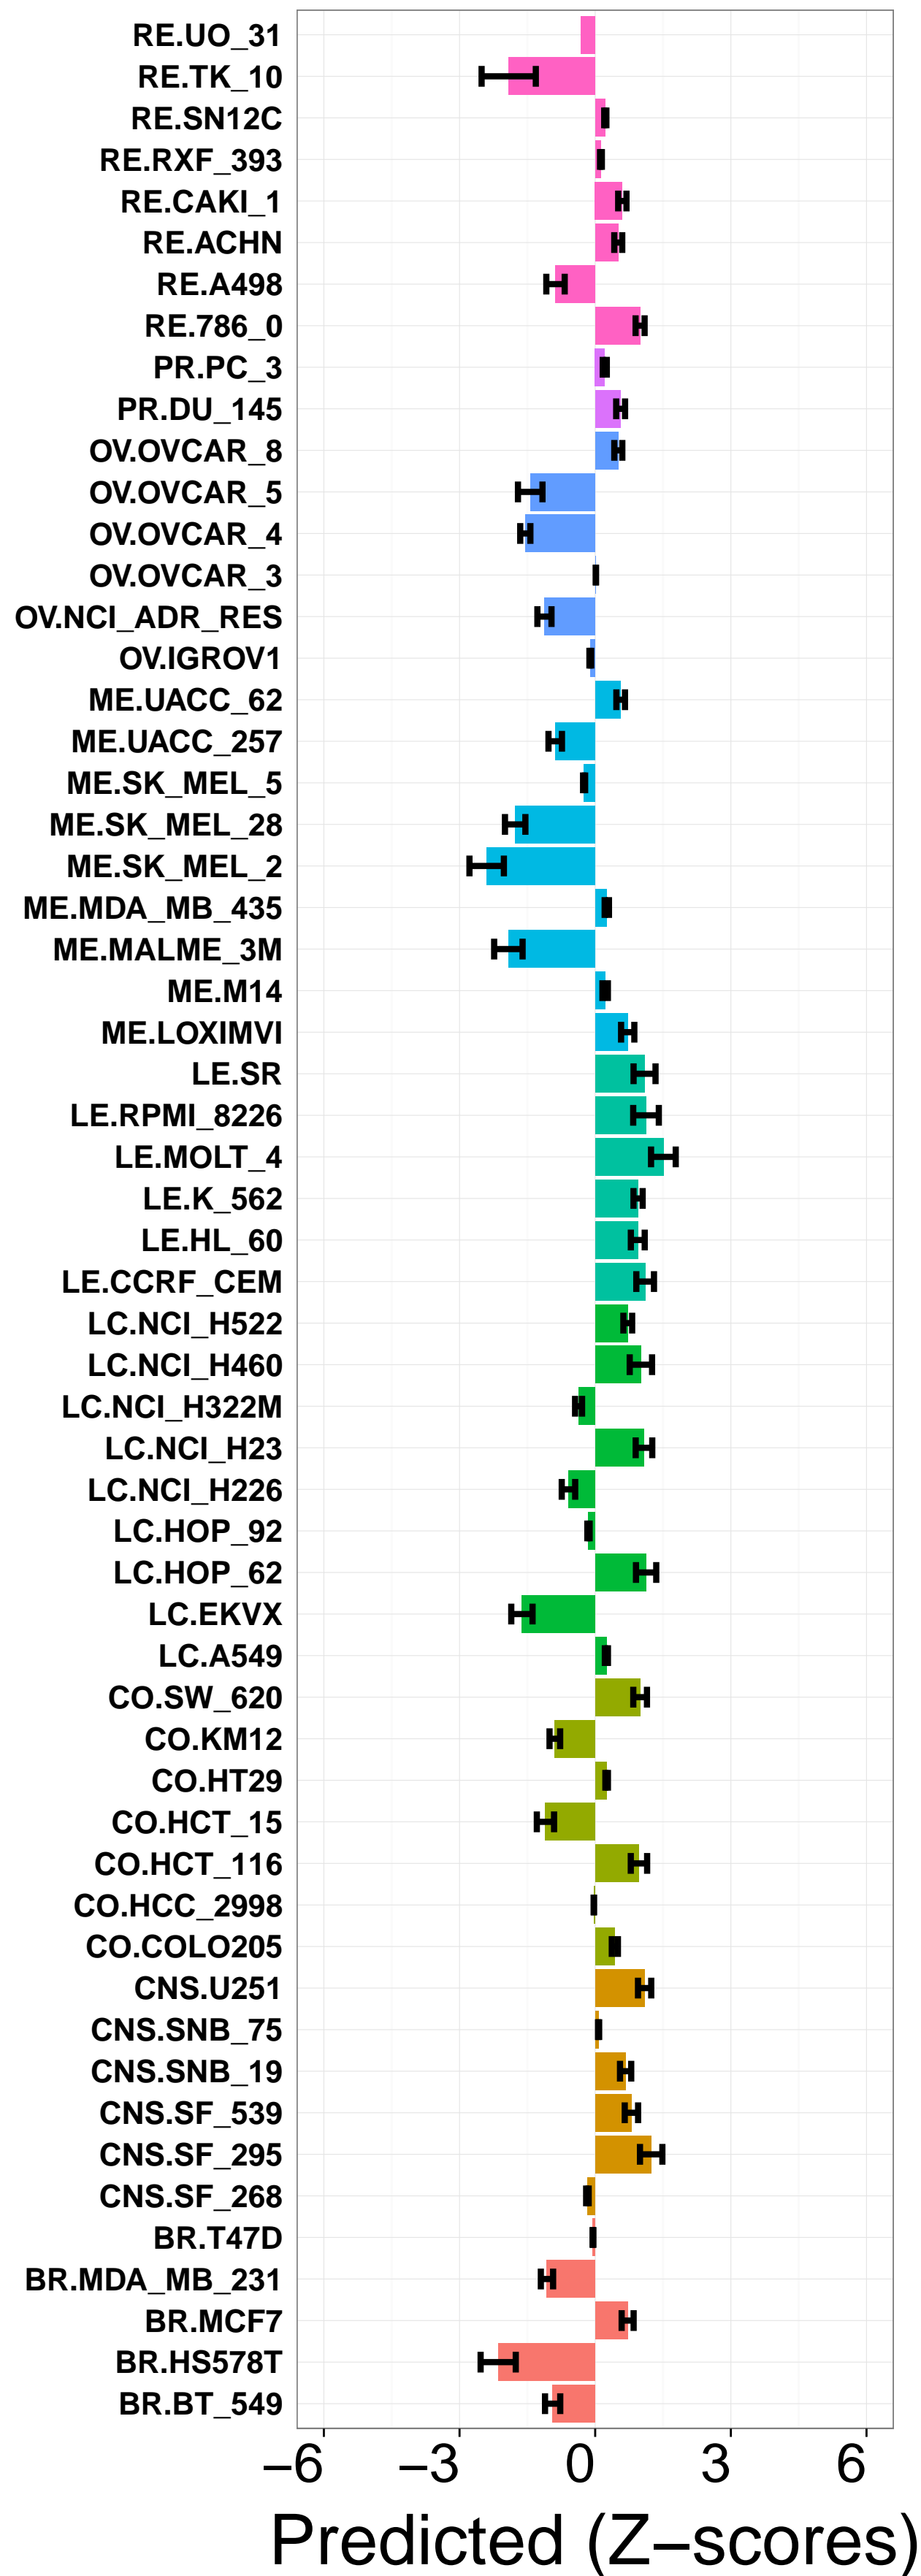

# NSC 726630, (Interpolation)

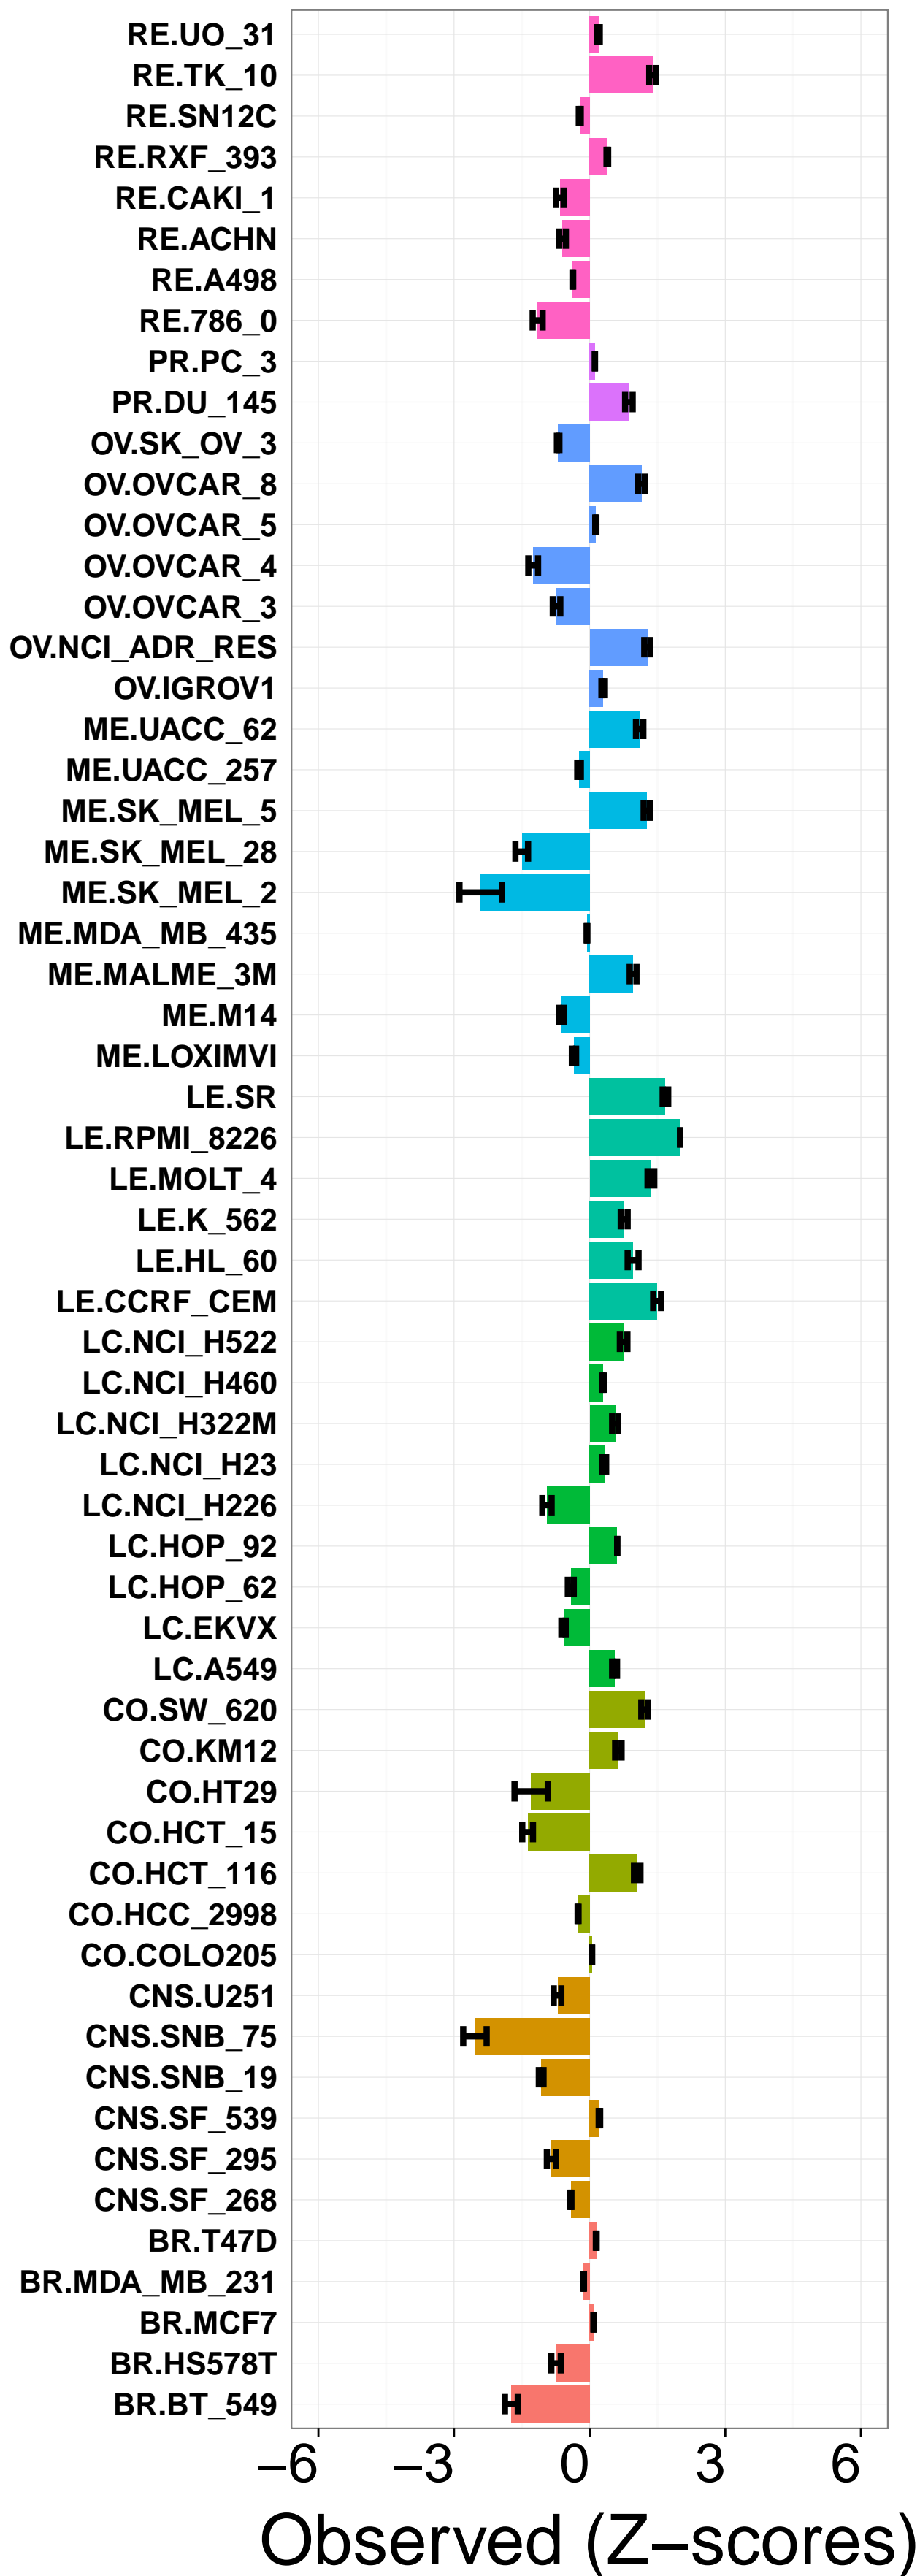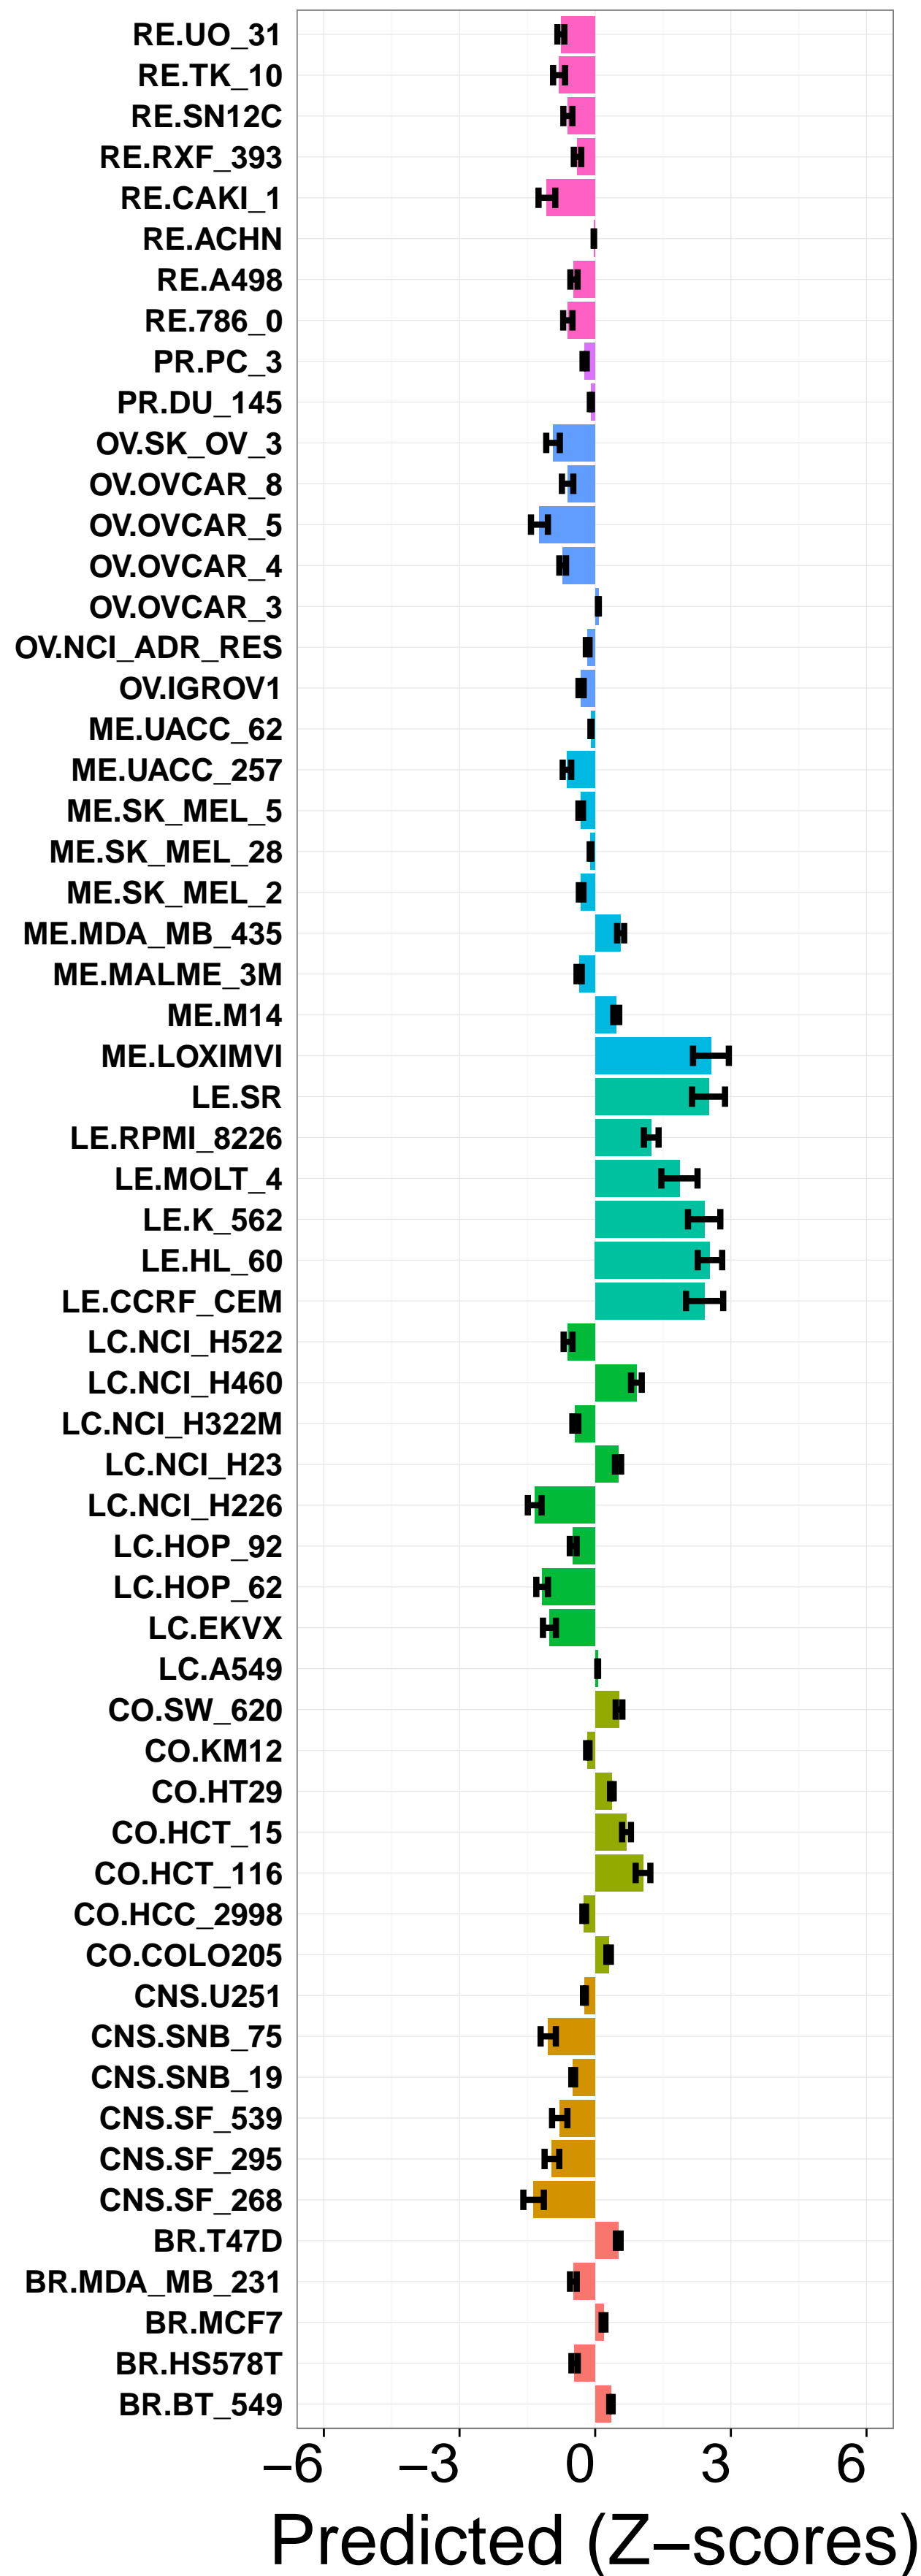



# NSC 728073, (Interpolation)

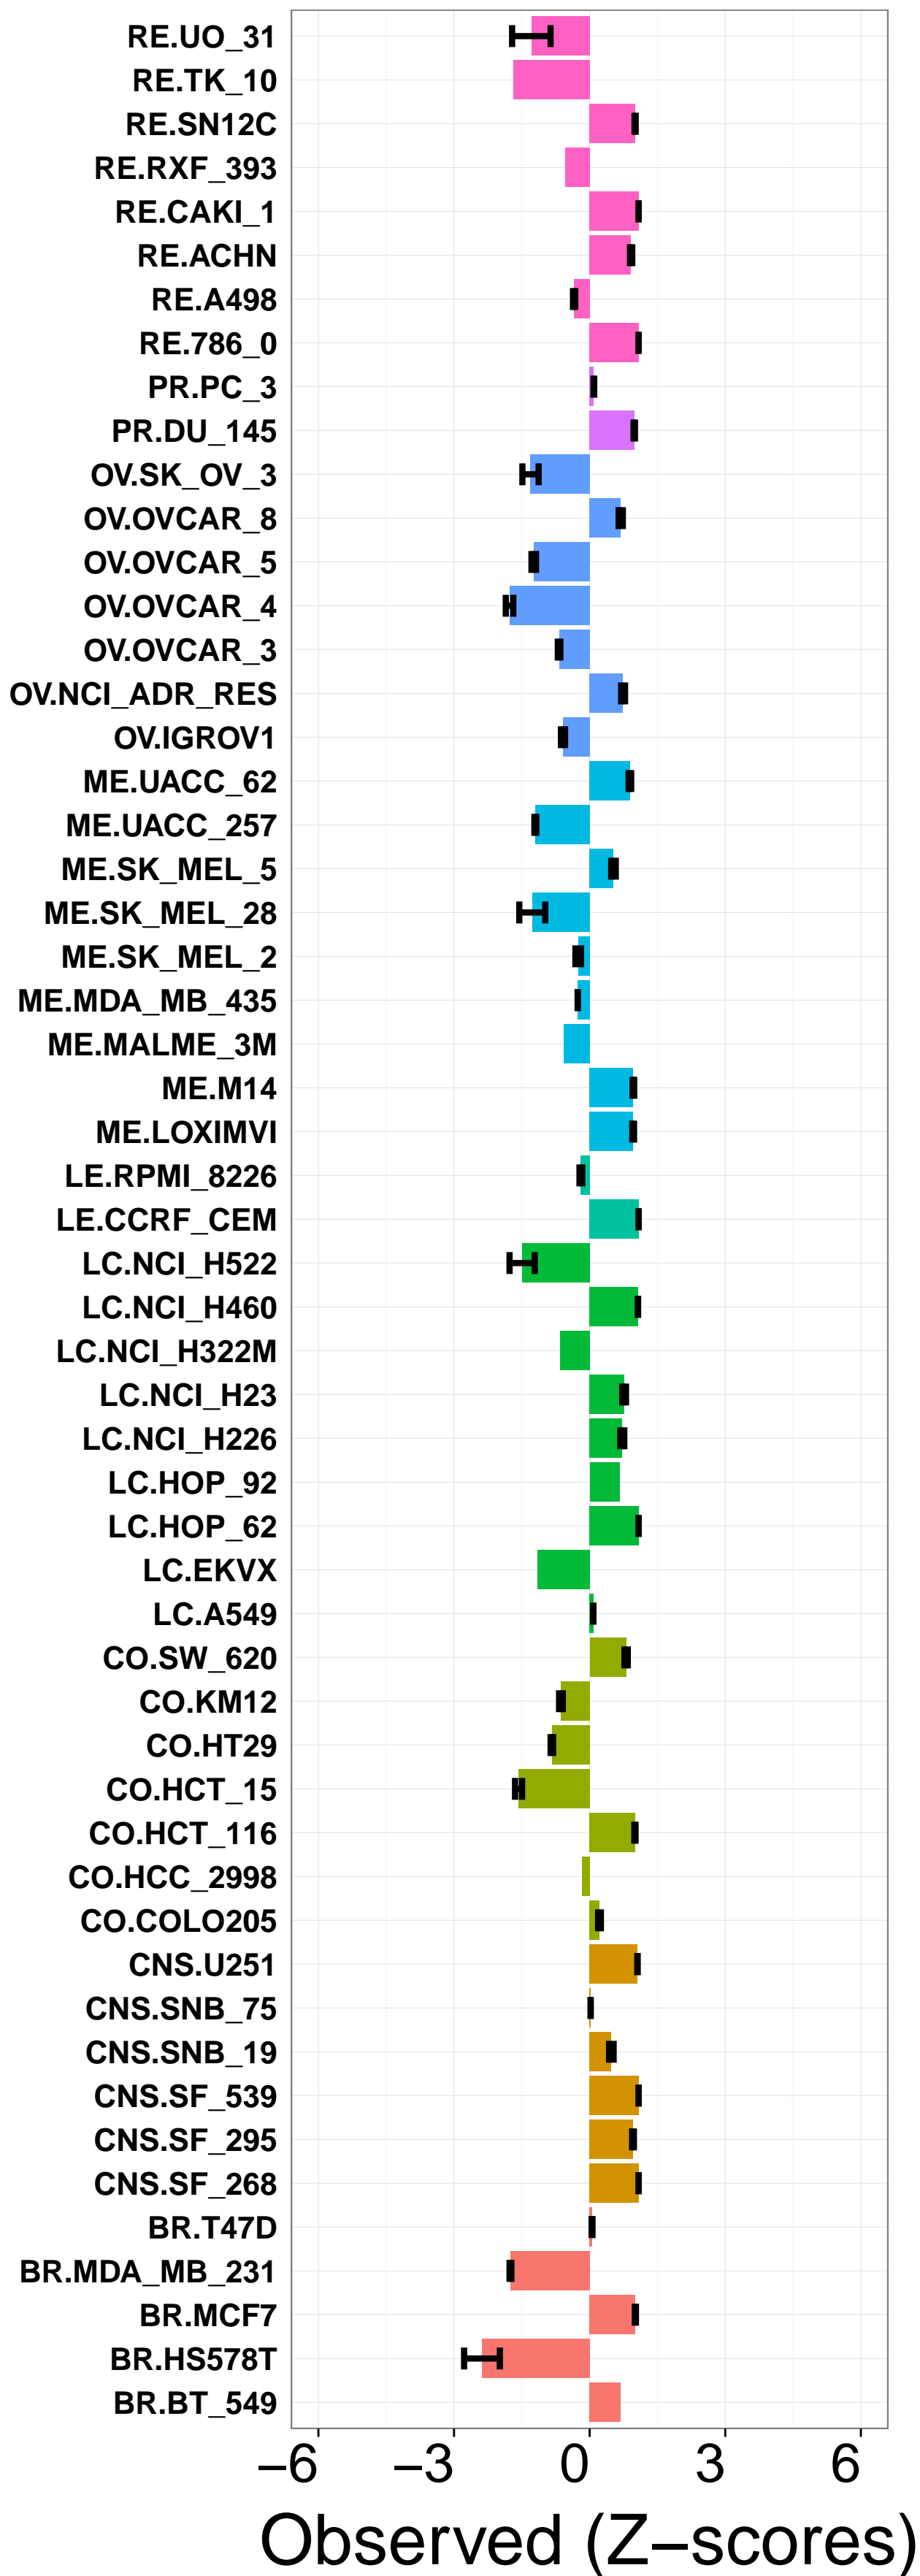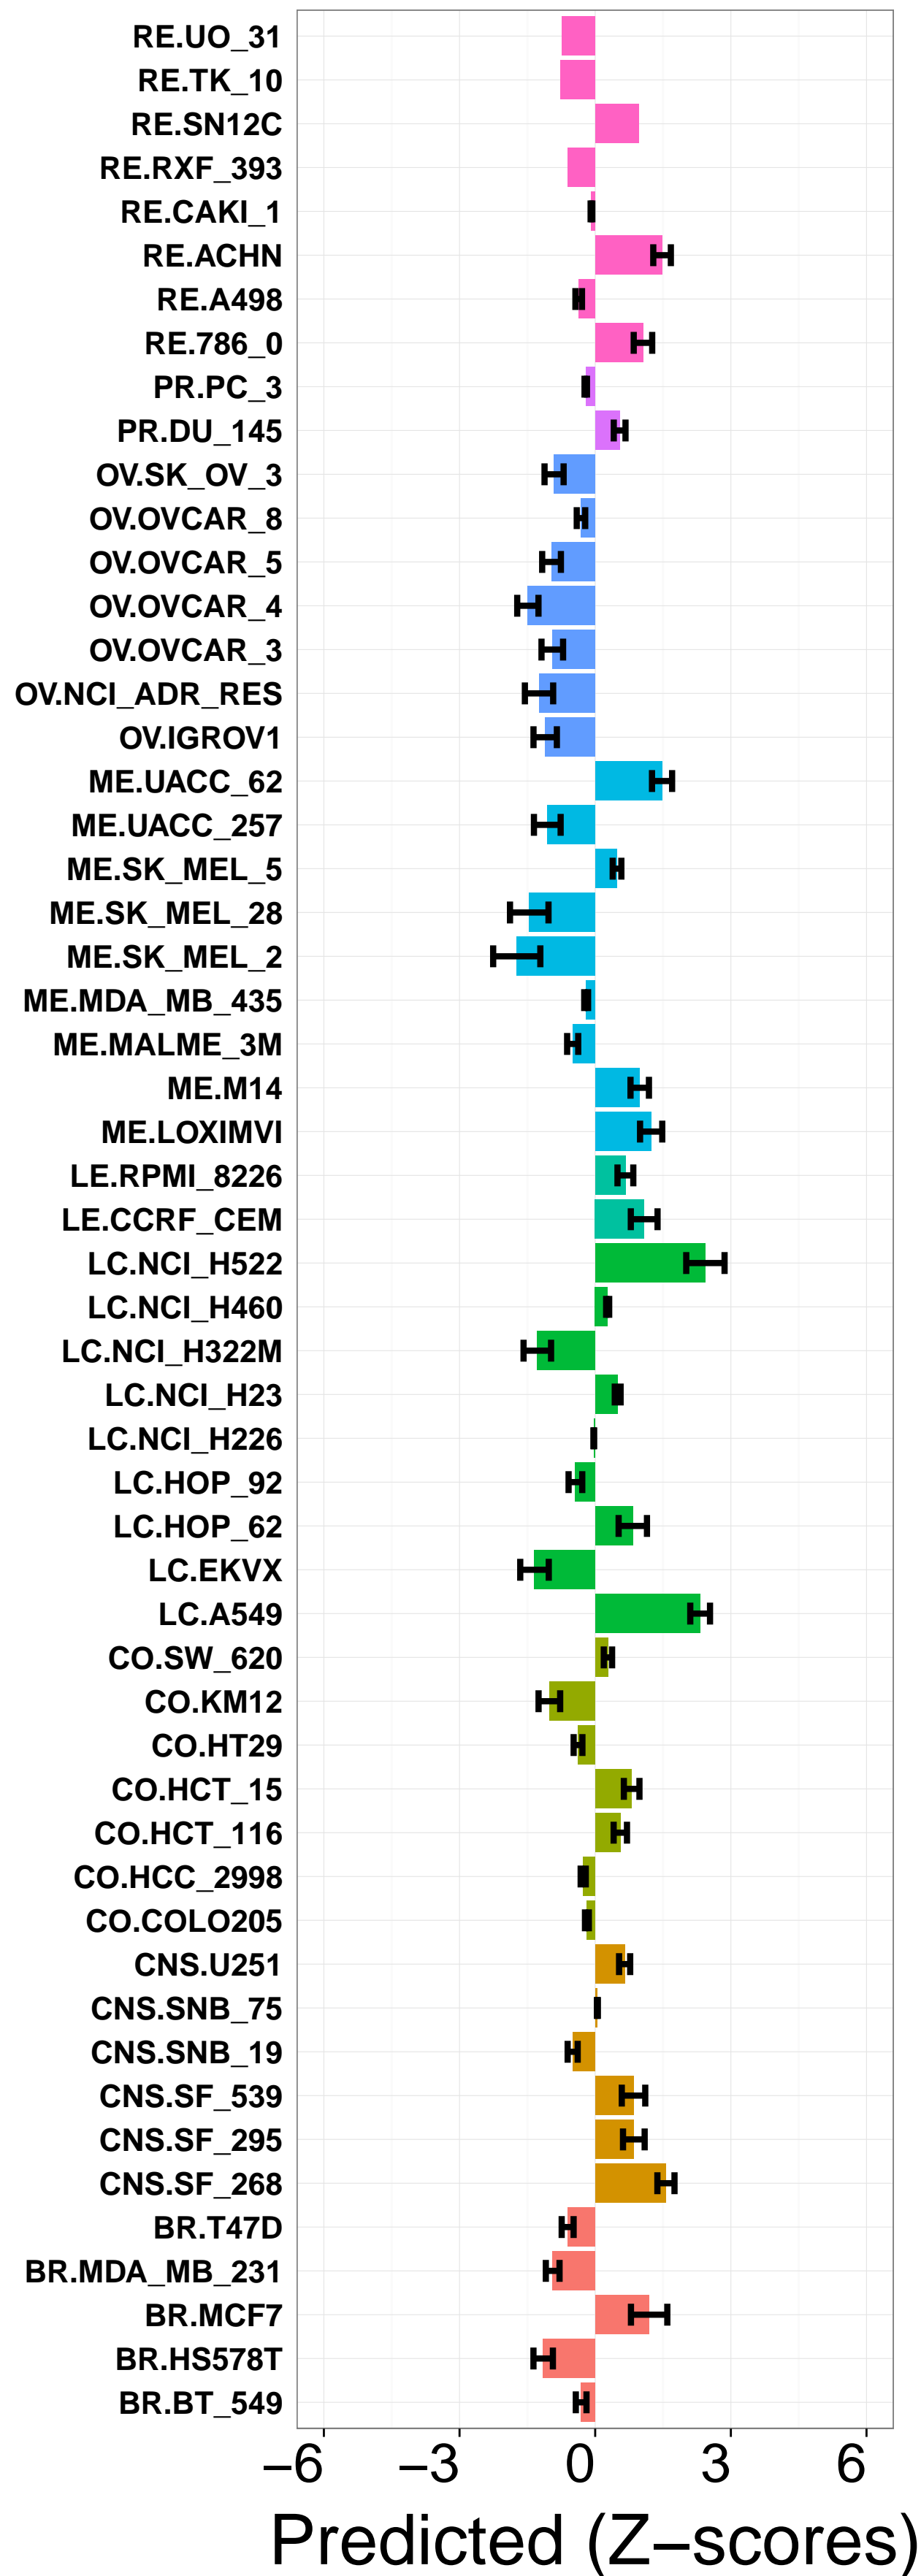

# NSC 732517, (Interpolation)

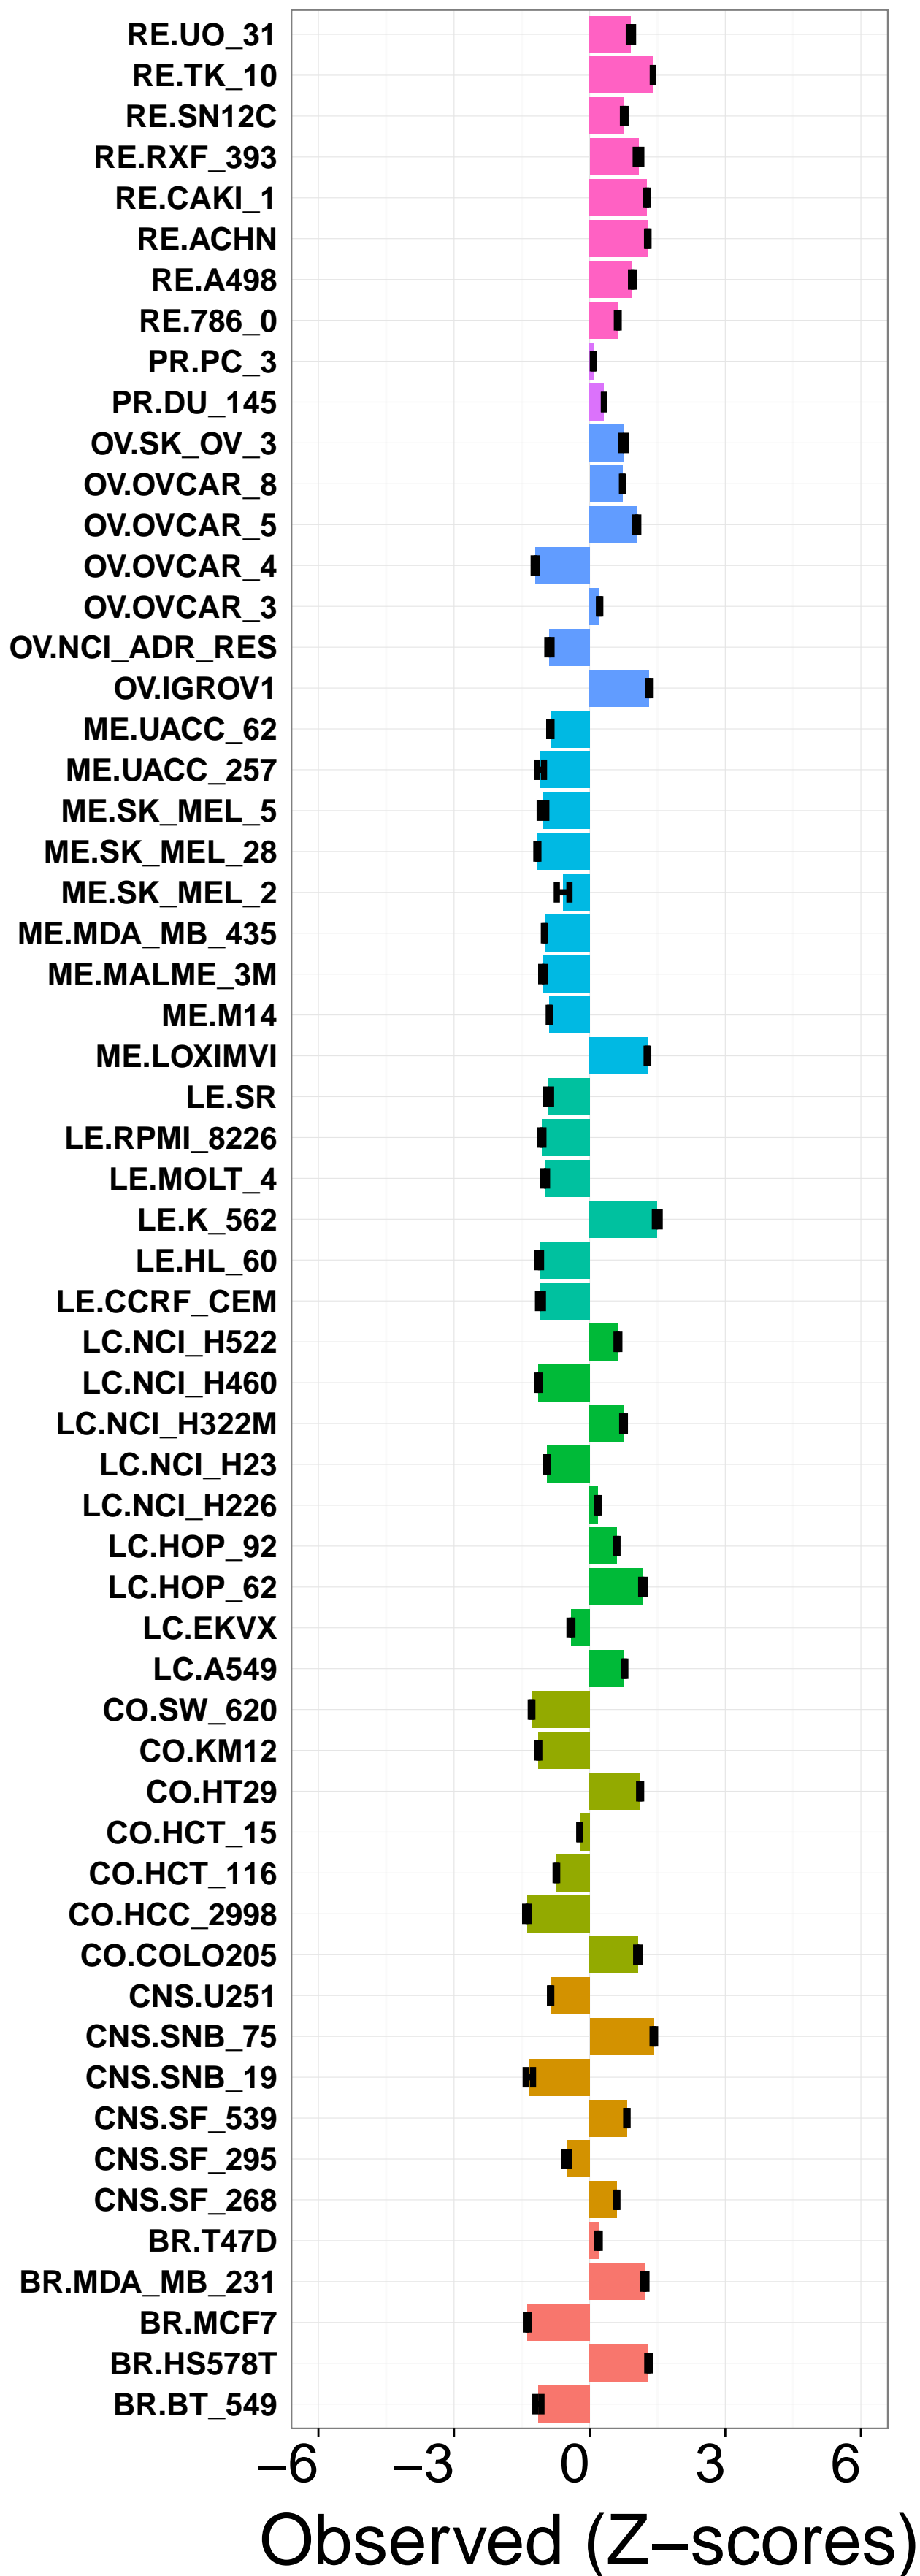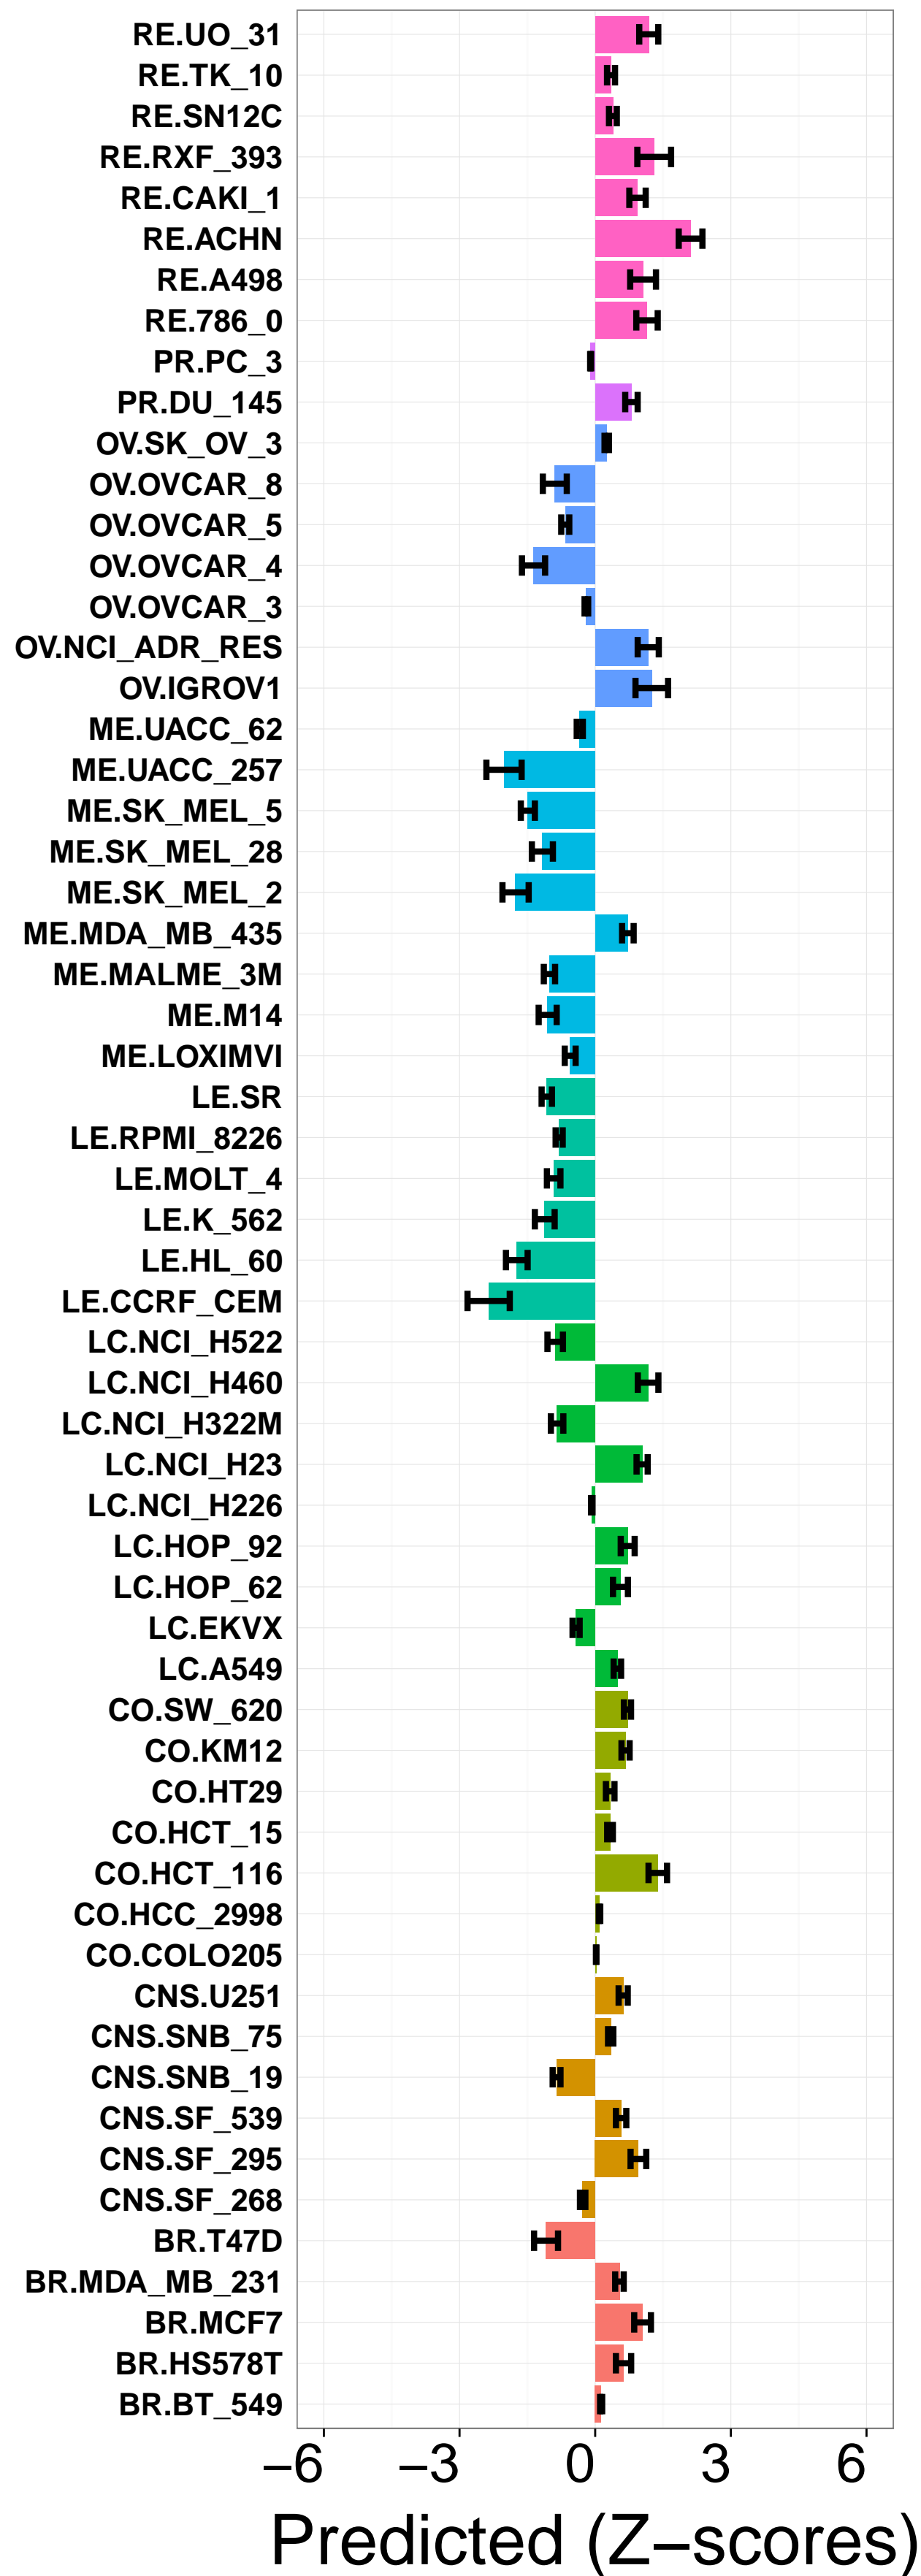

# NSC 740, Methotrexate (Interpolation)

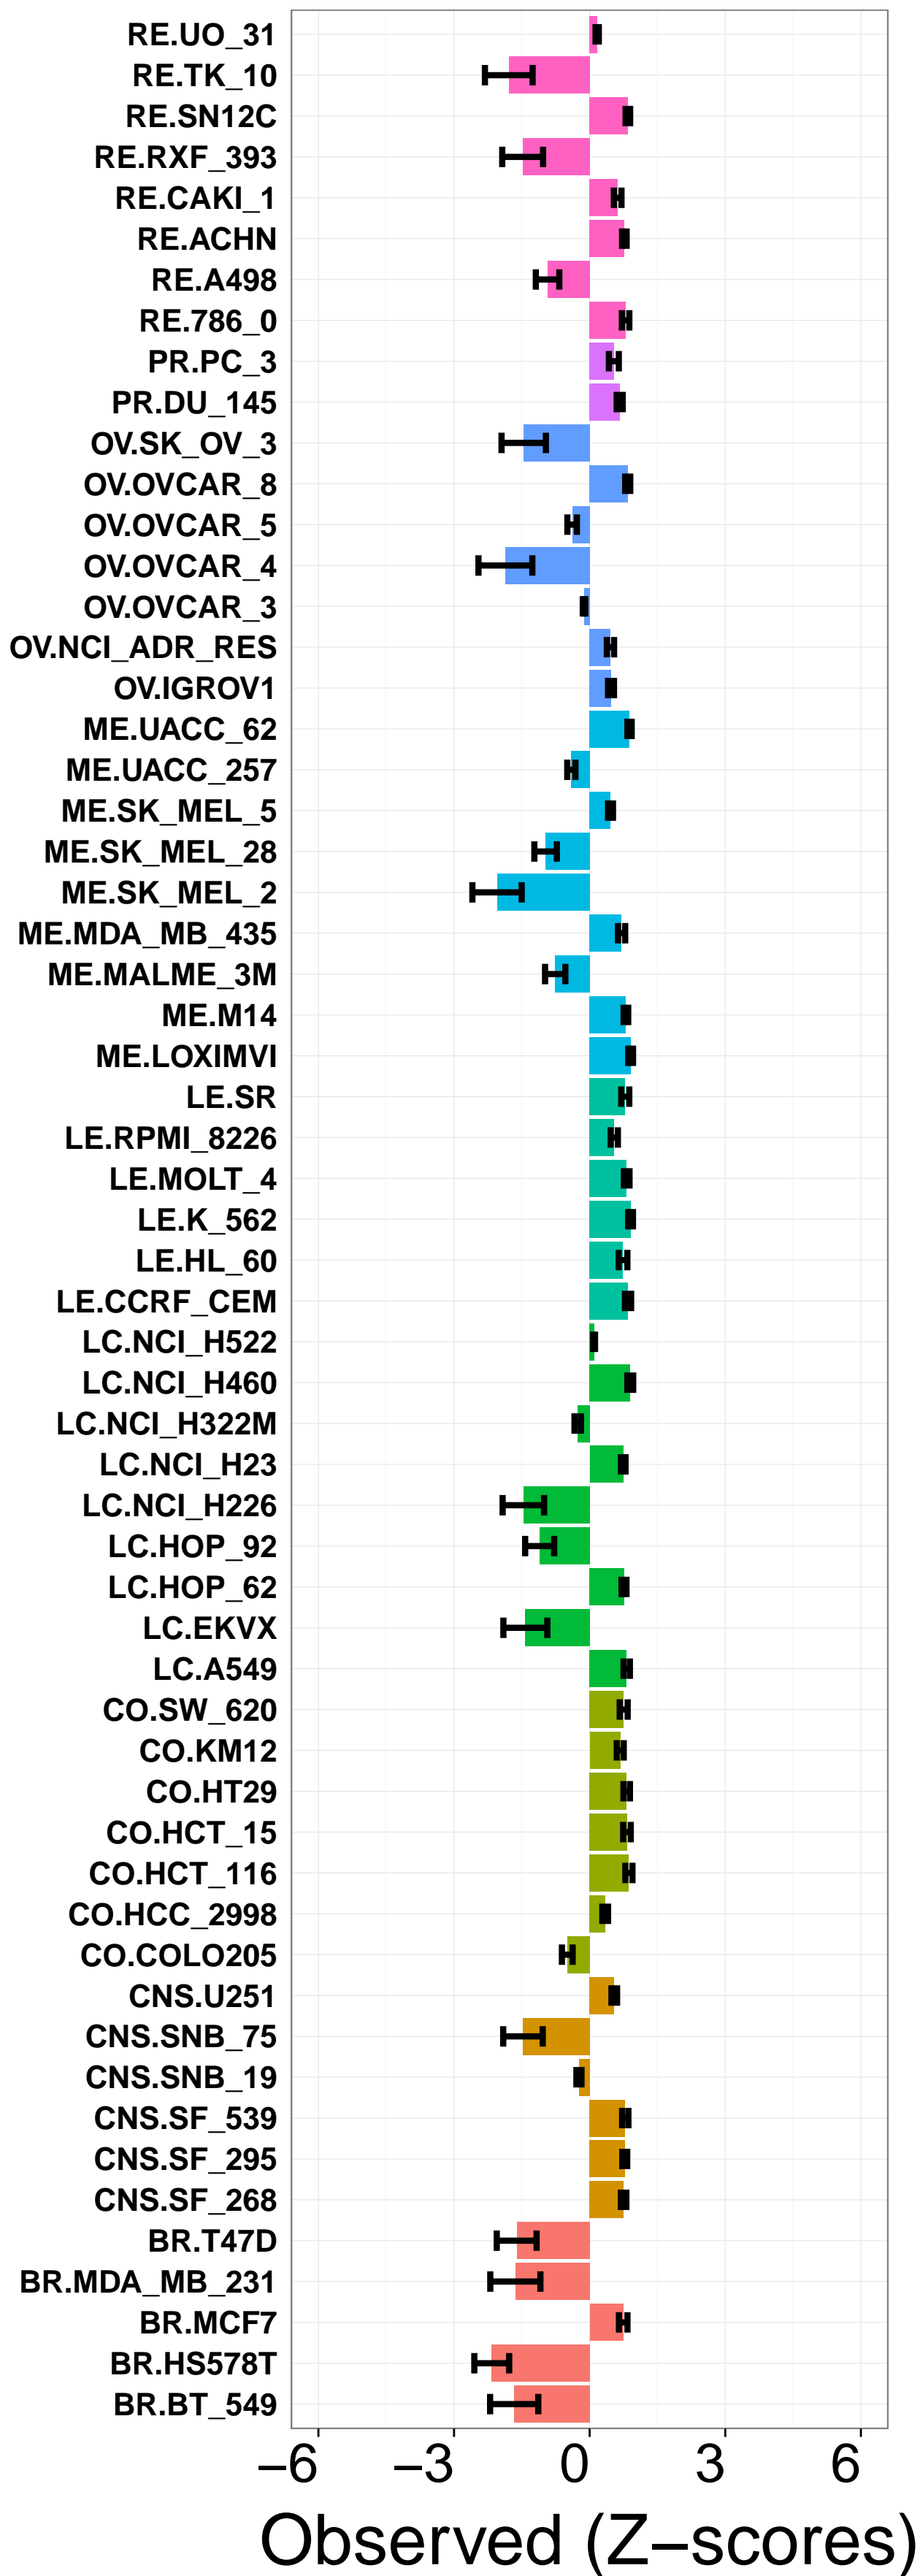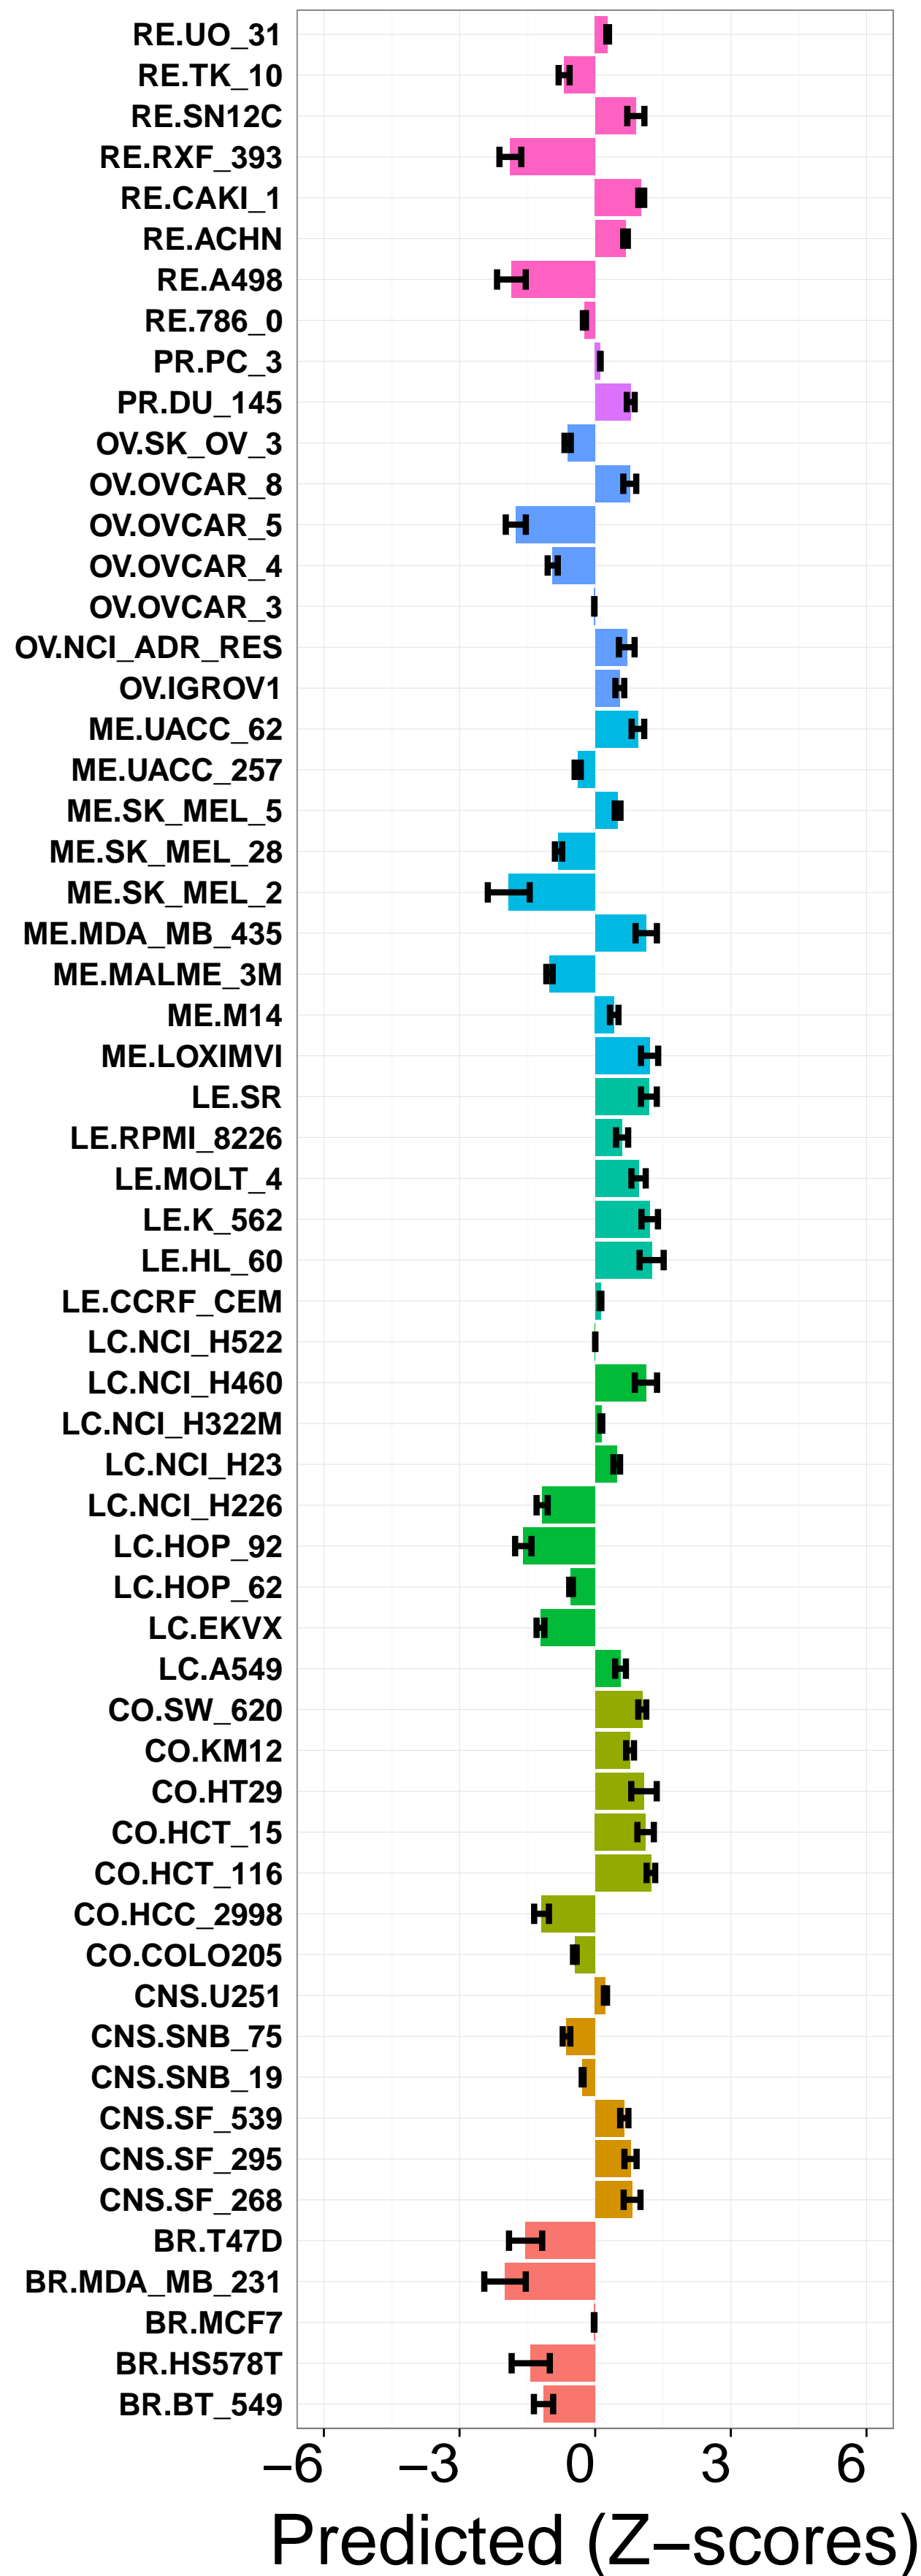

# NSC 741078, selumetinib (Interpolation)

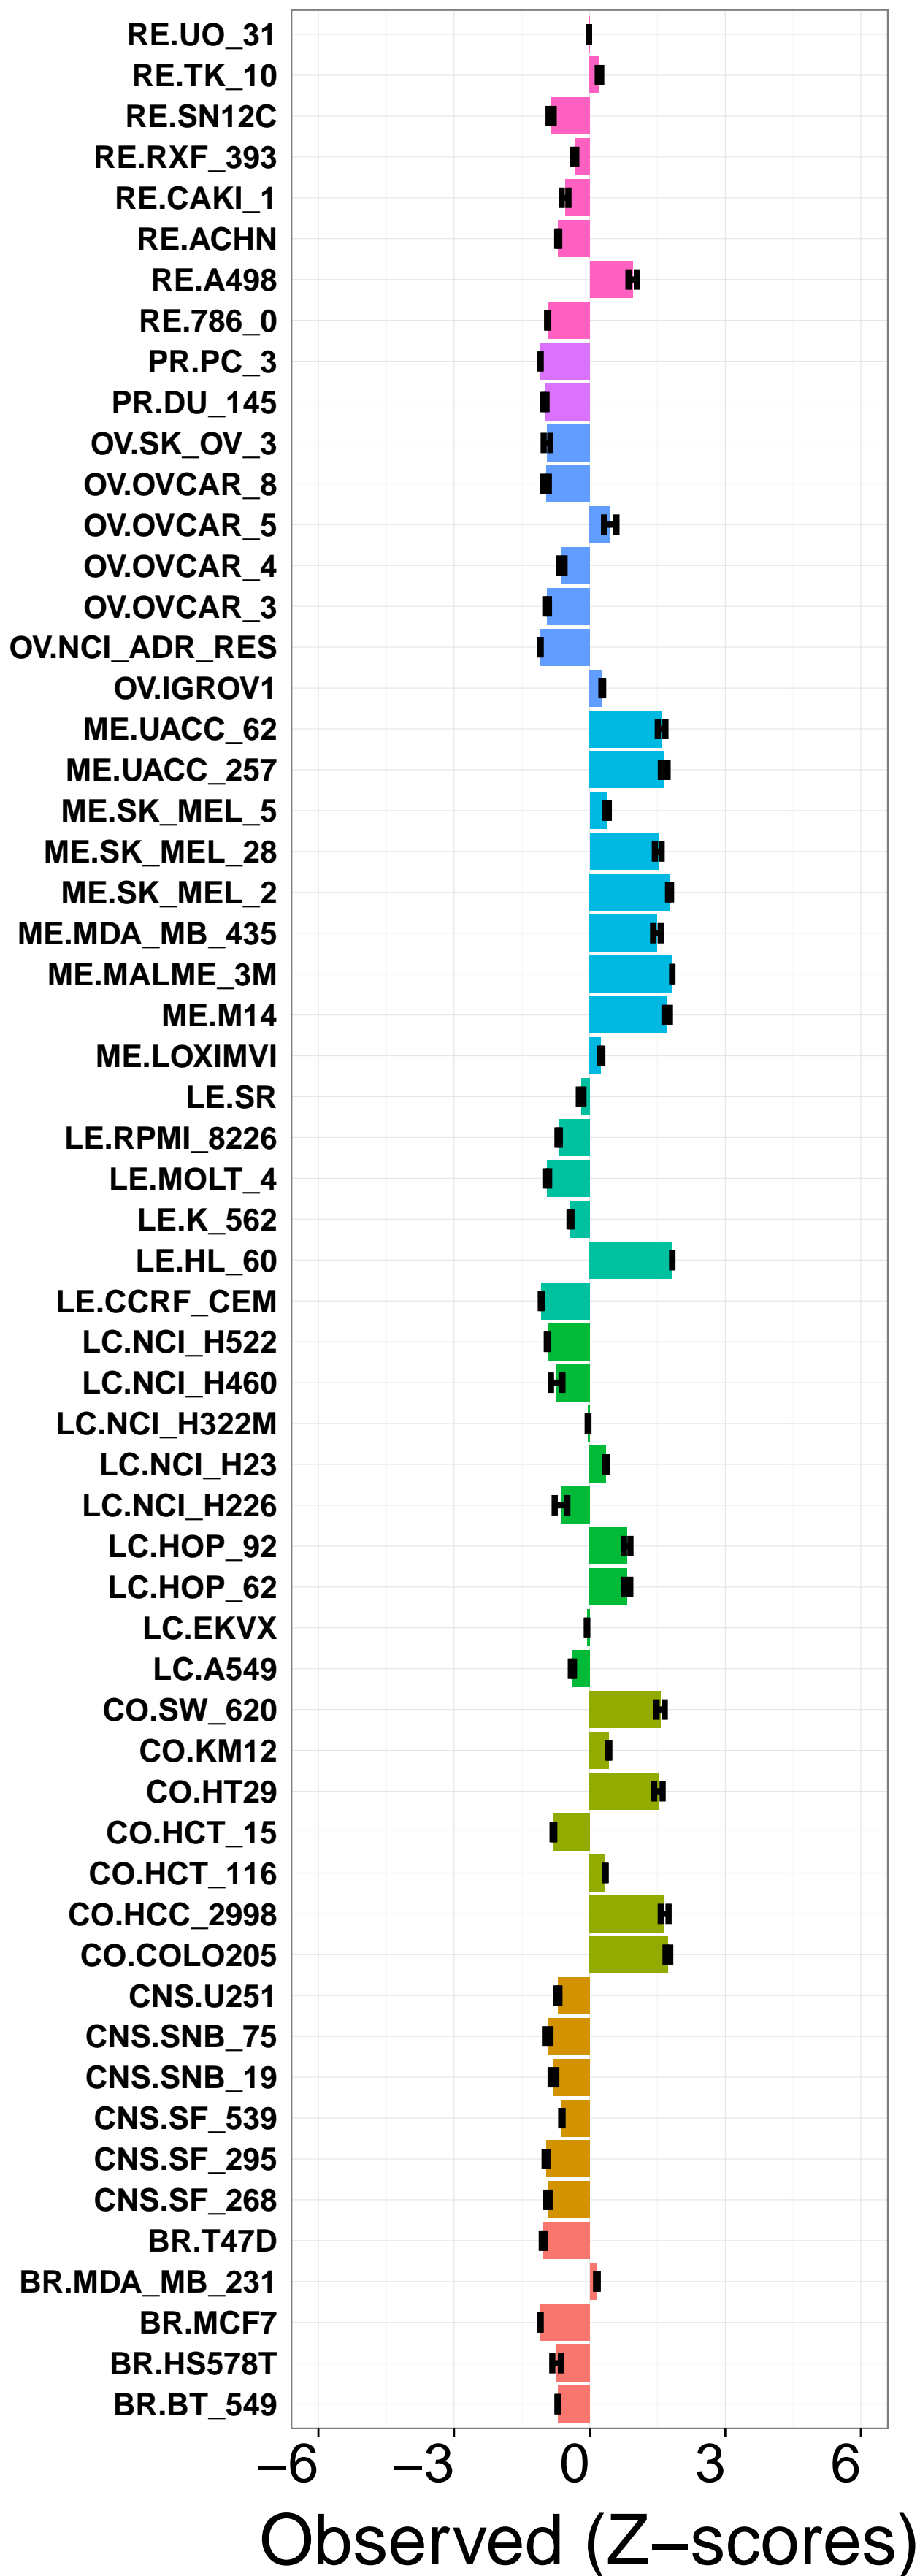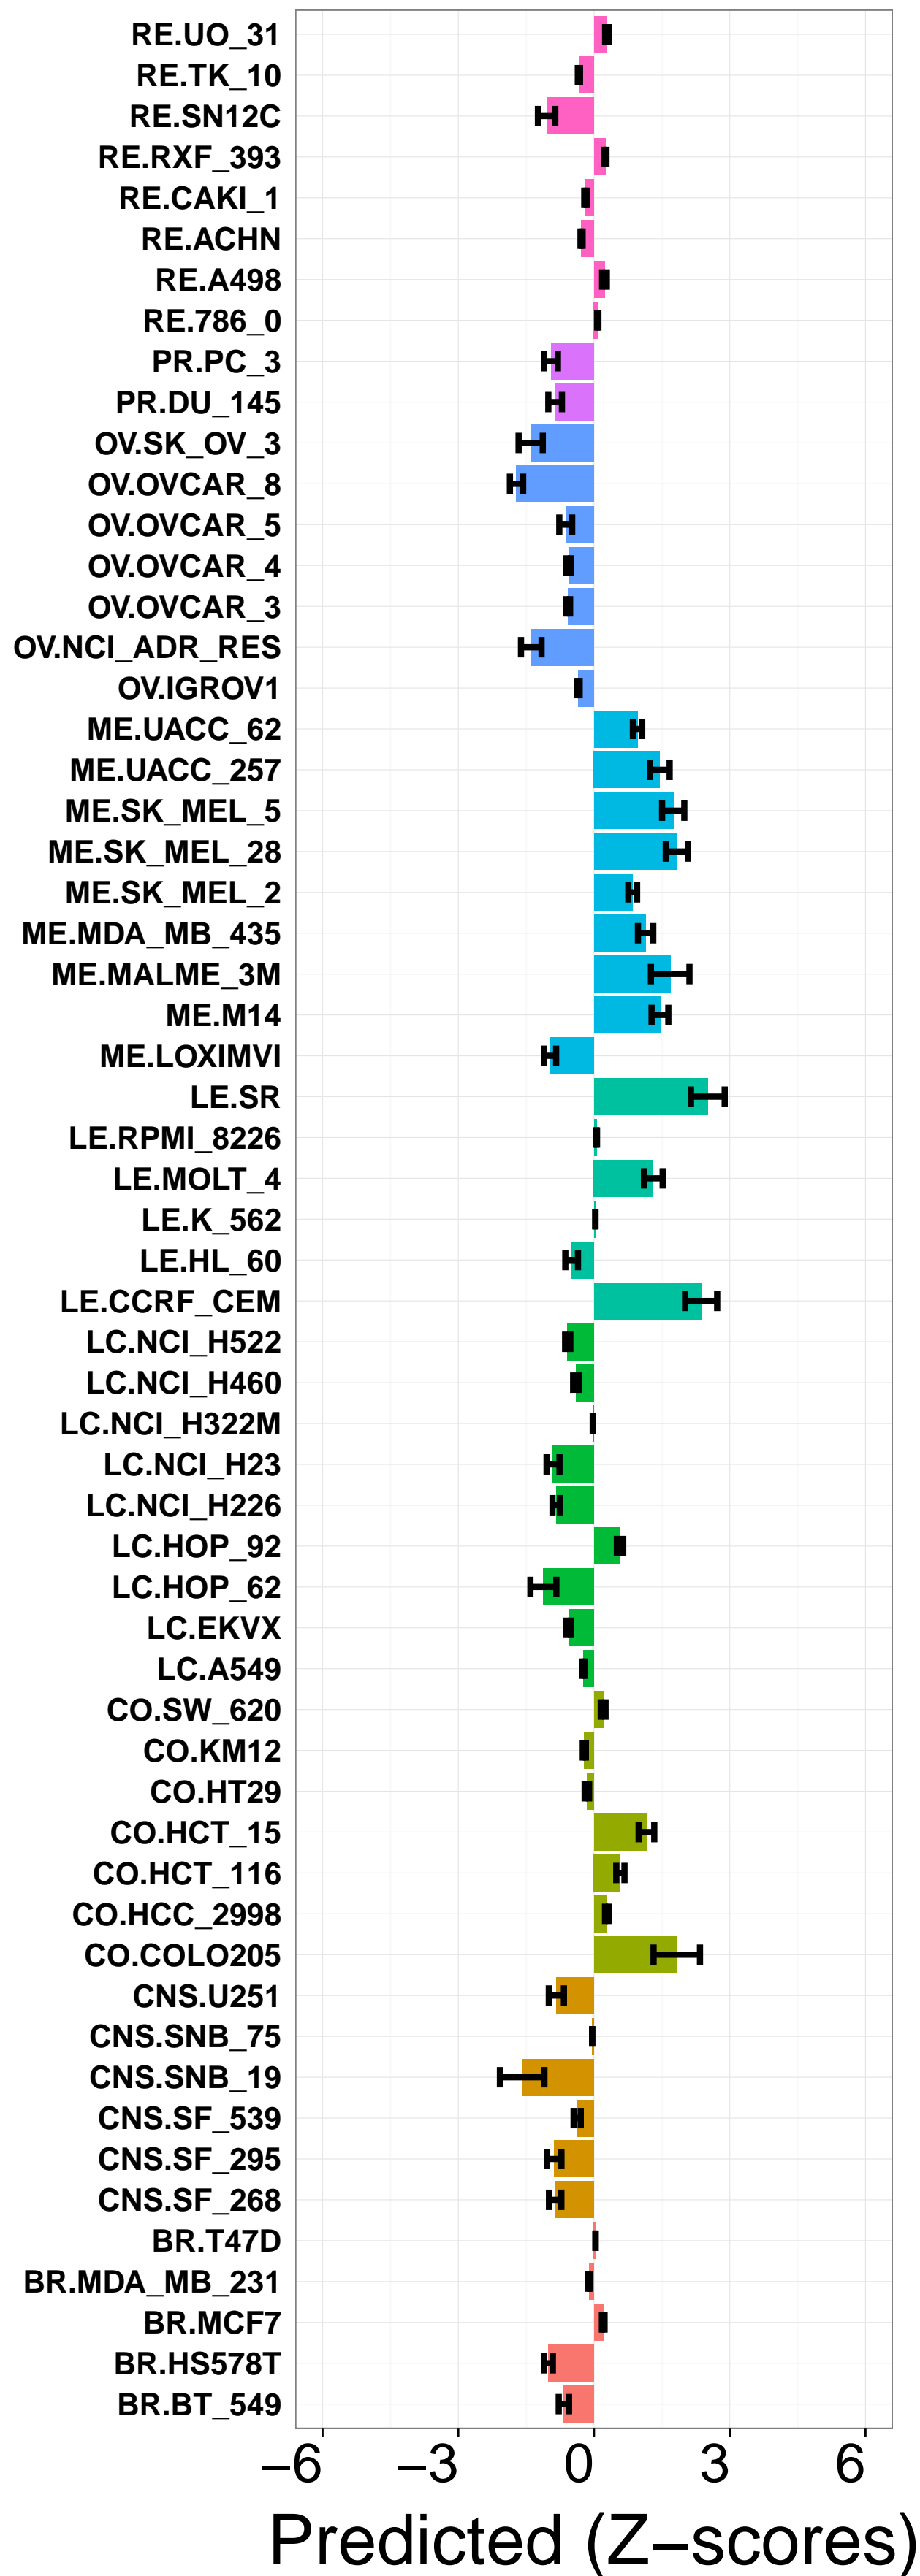

# NSC 745750, Tykerb (Interpolation)

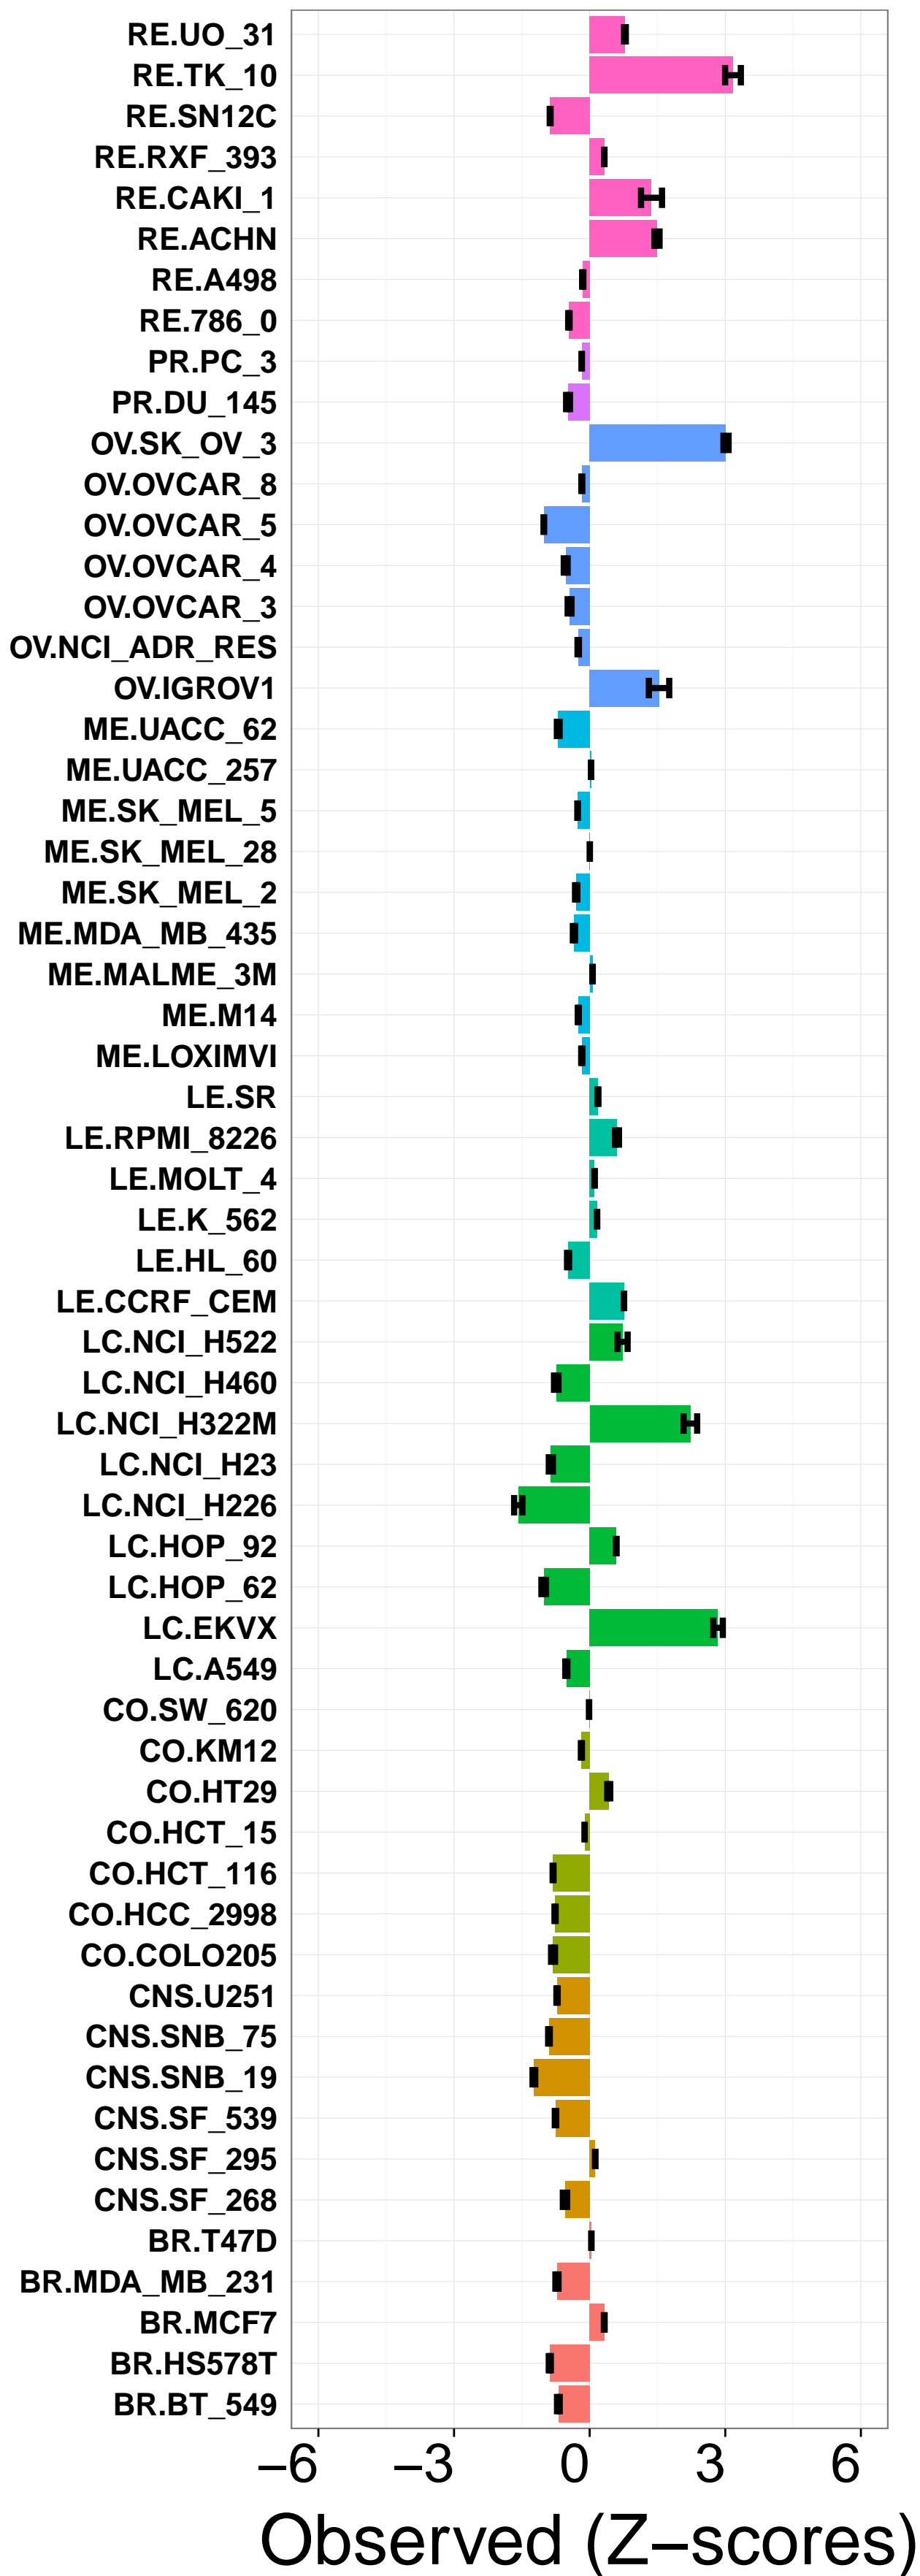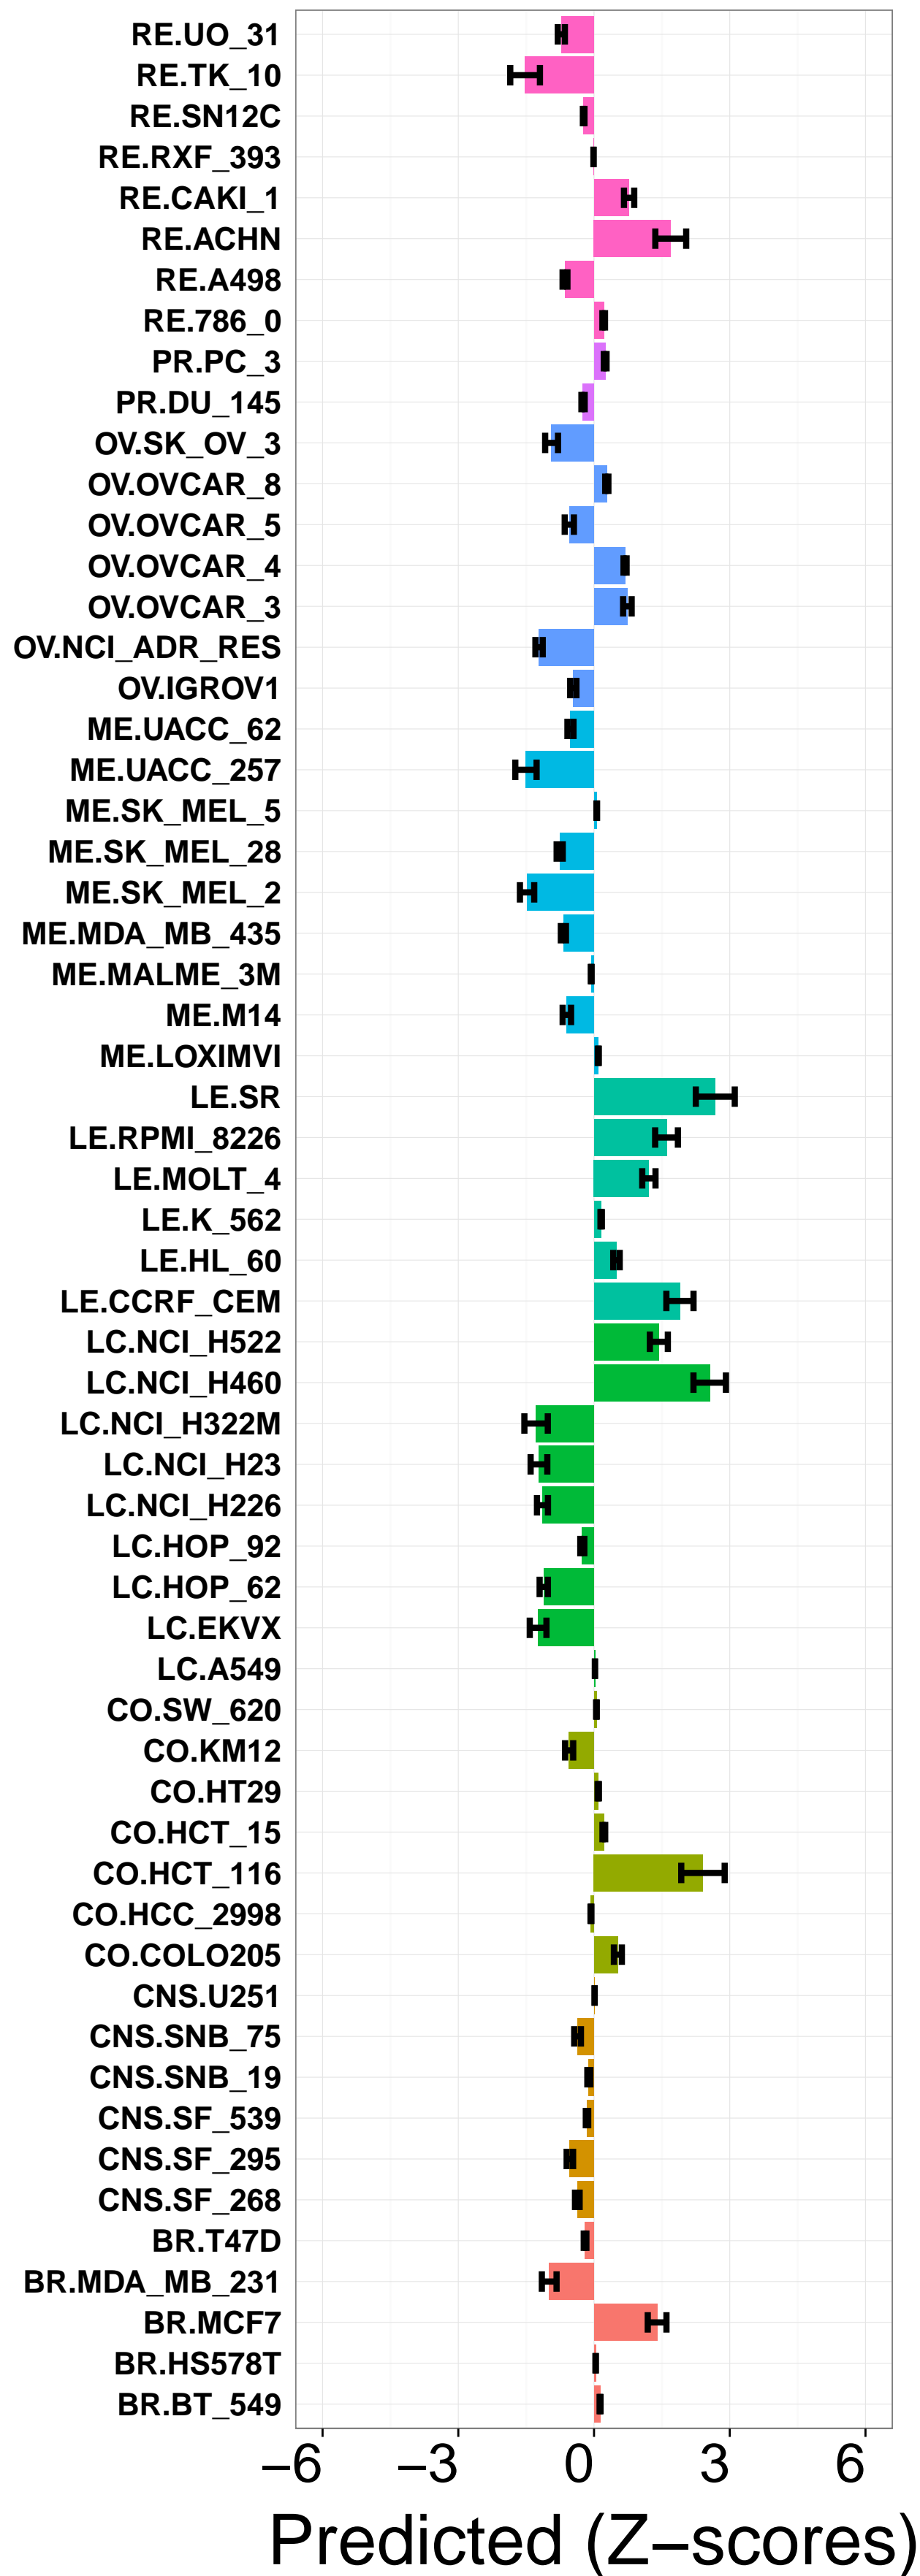



# NSC 749226, (Interpolation)

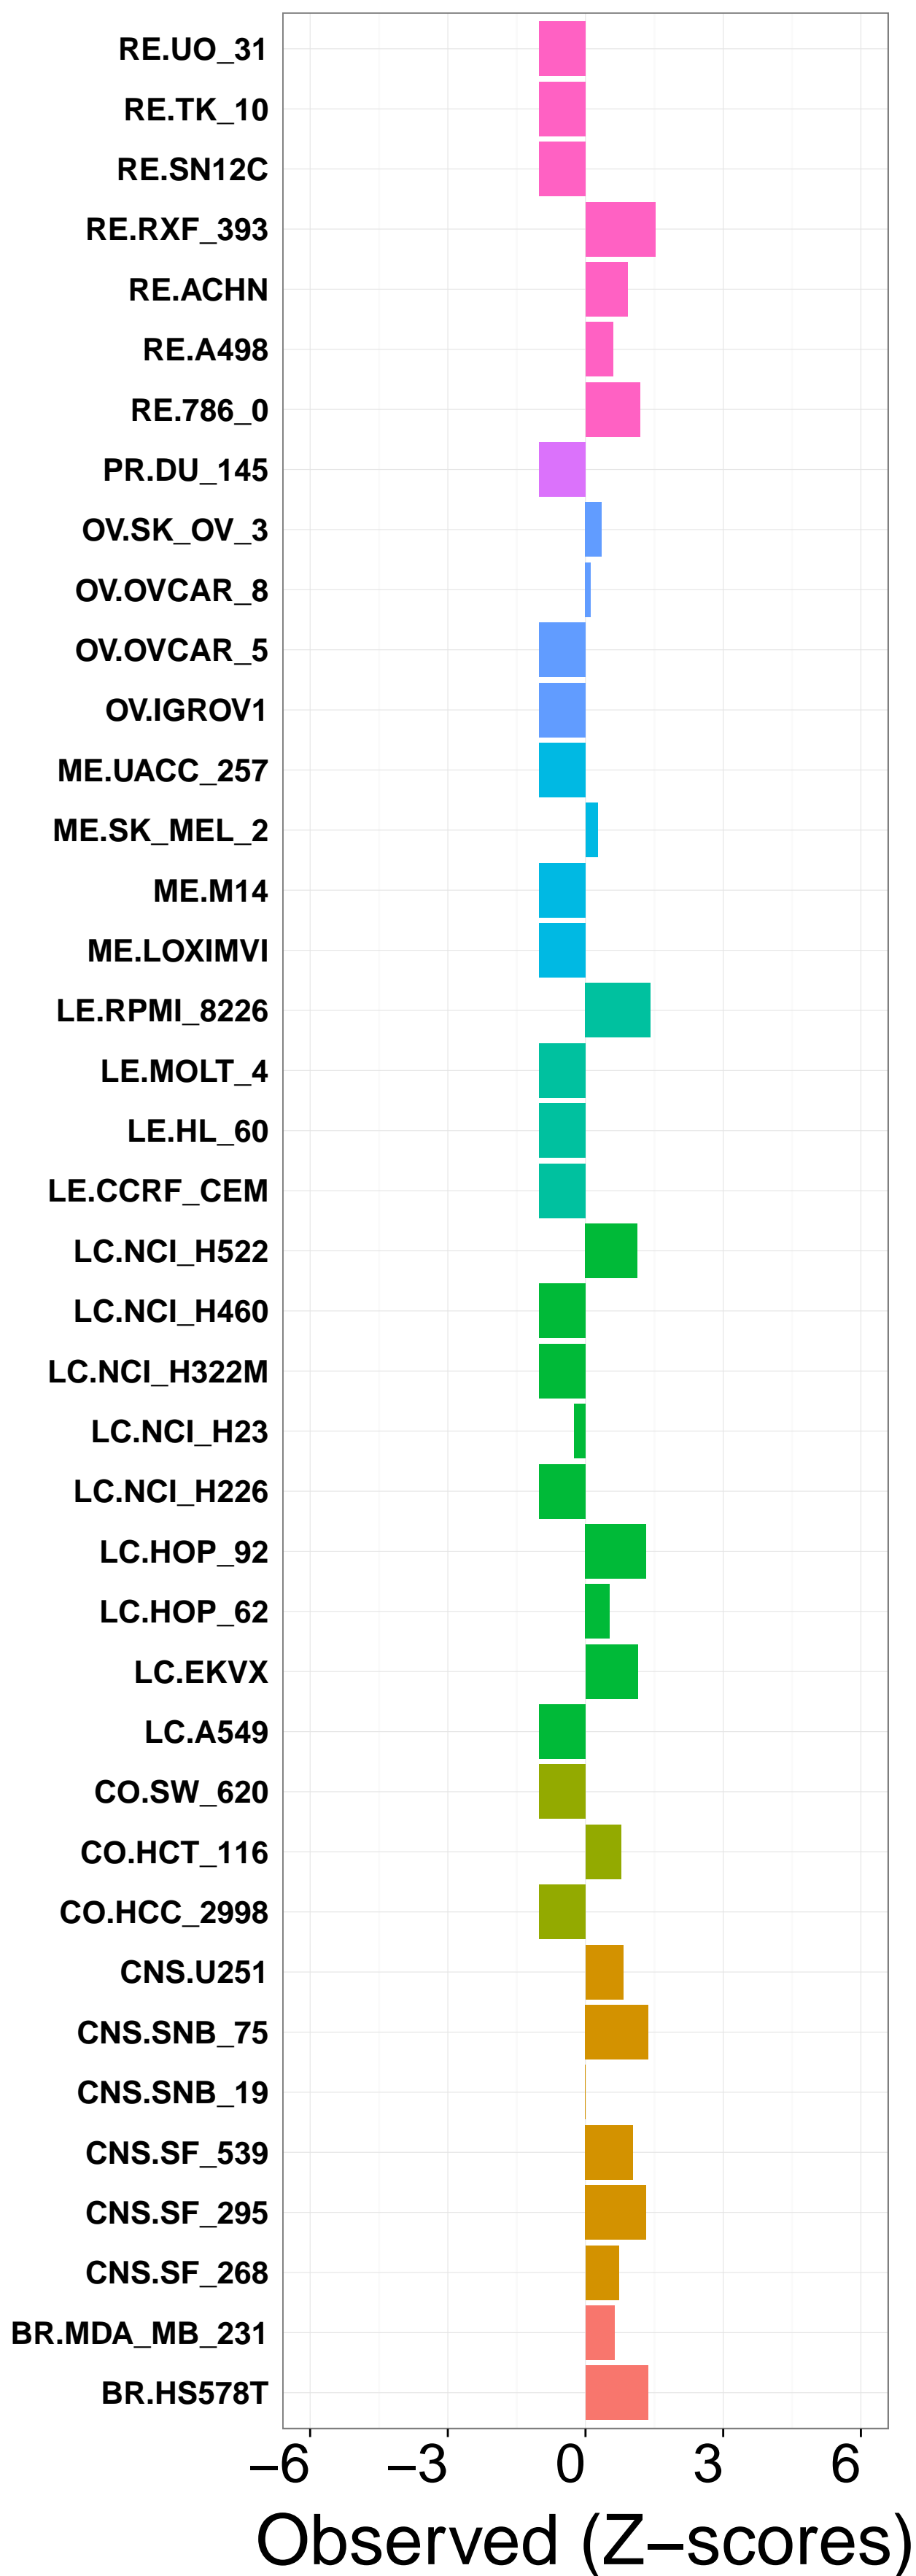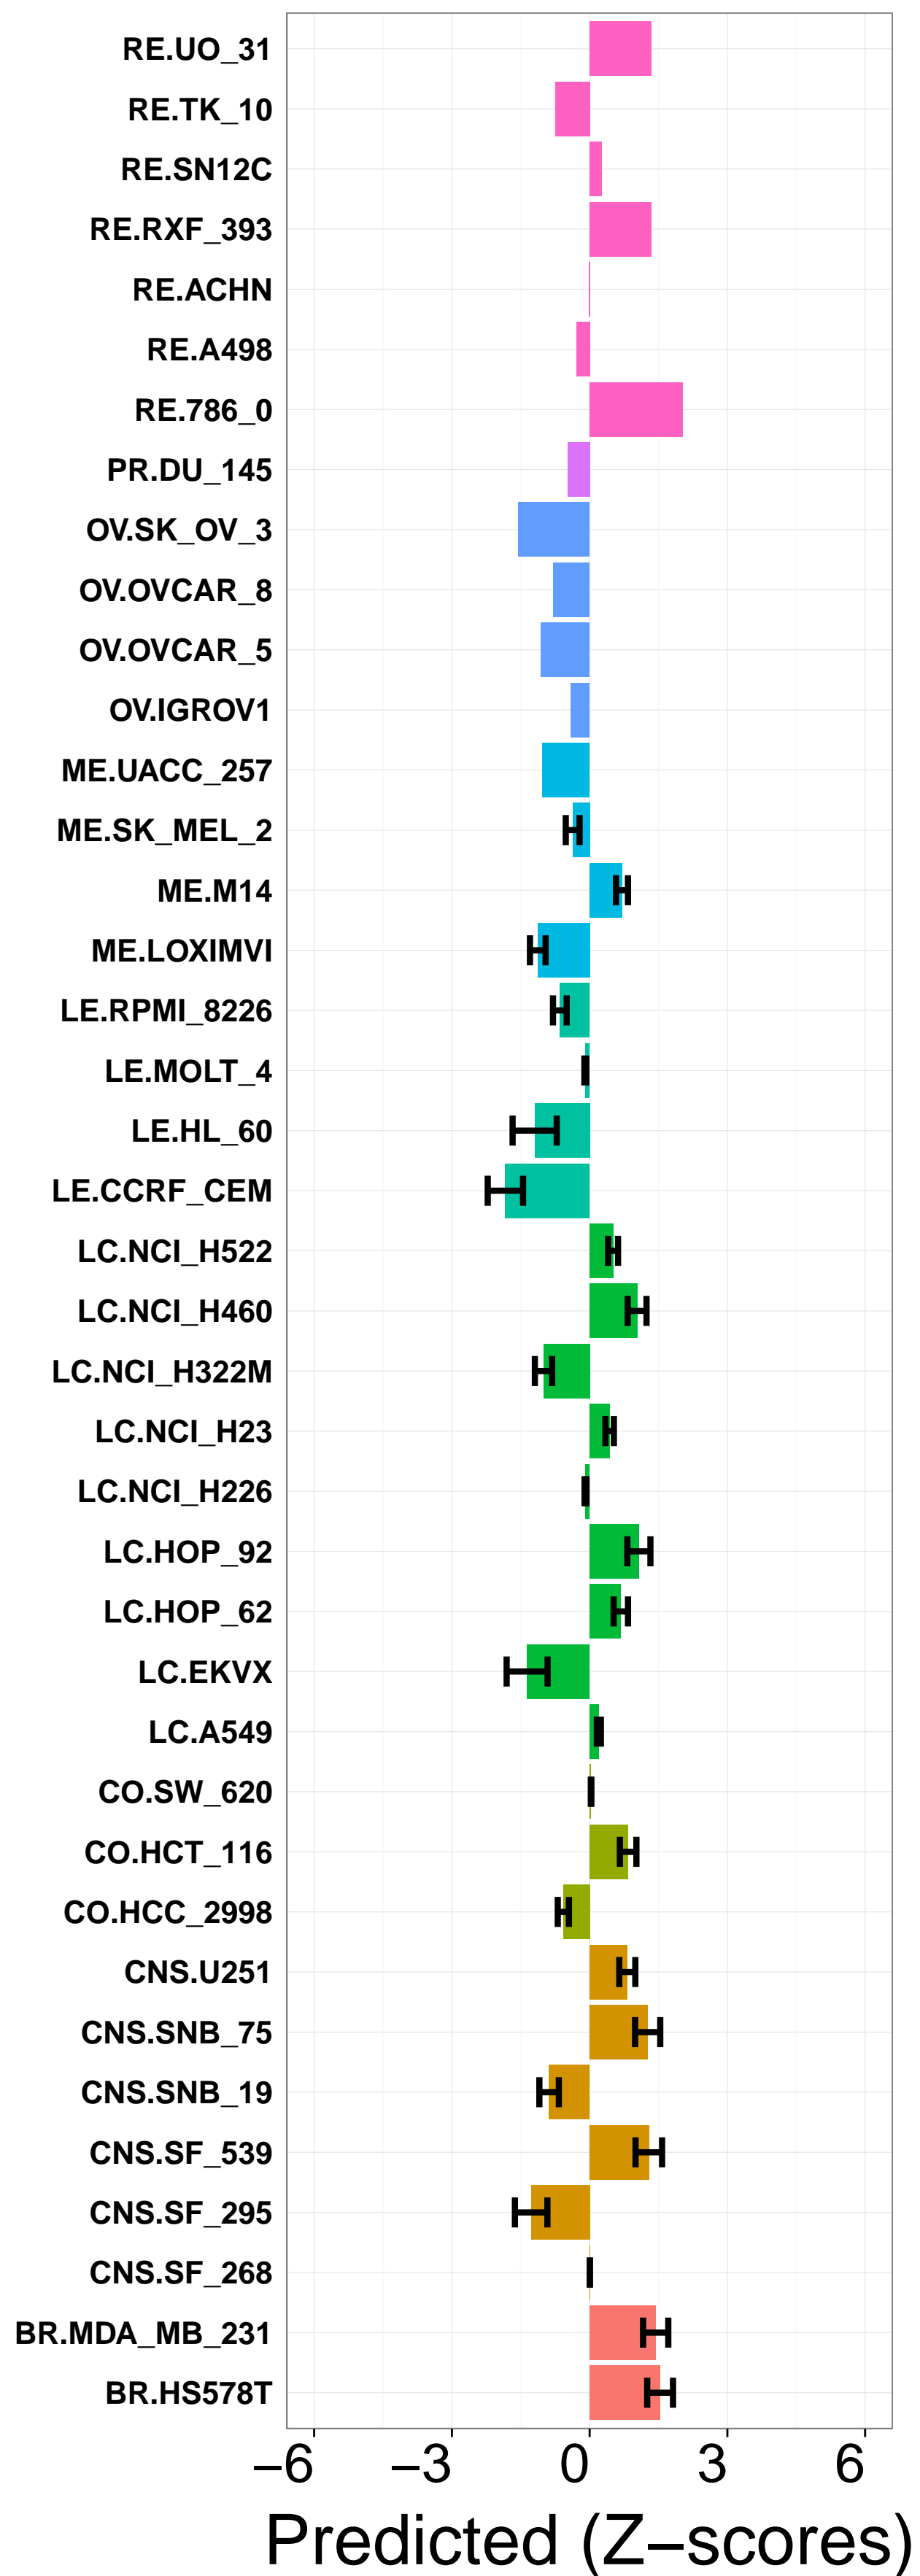

# NSC 755, Mercaptopurine (Interpolation)

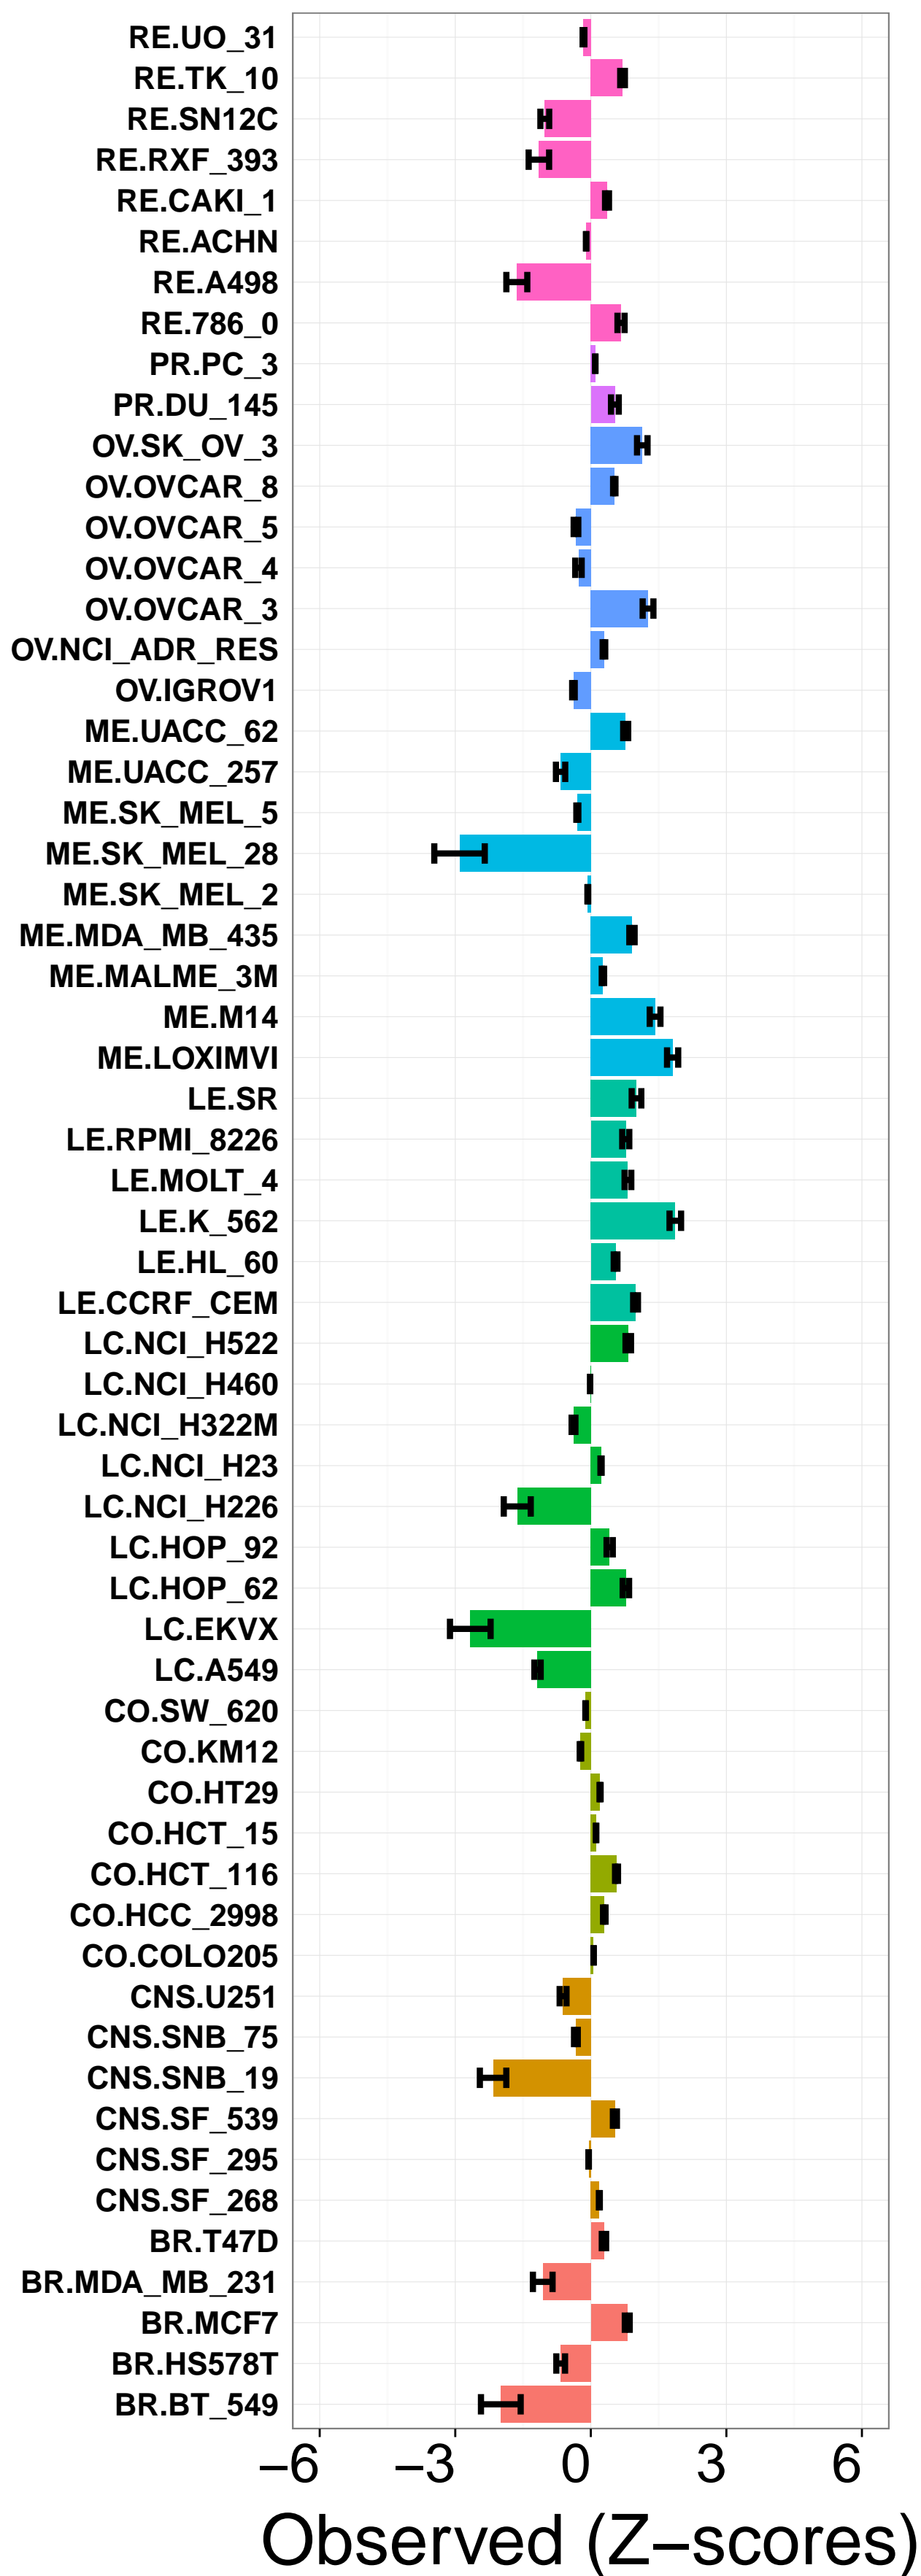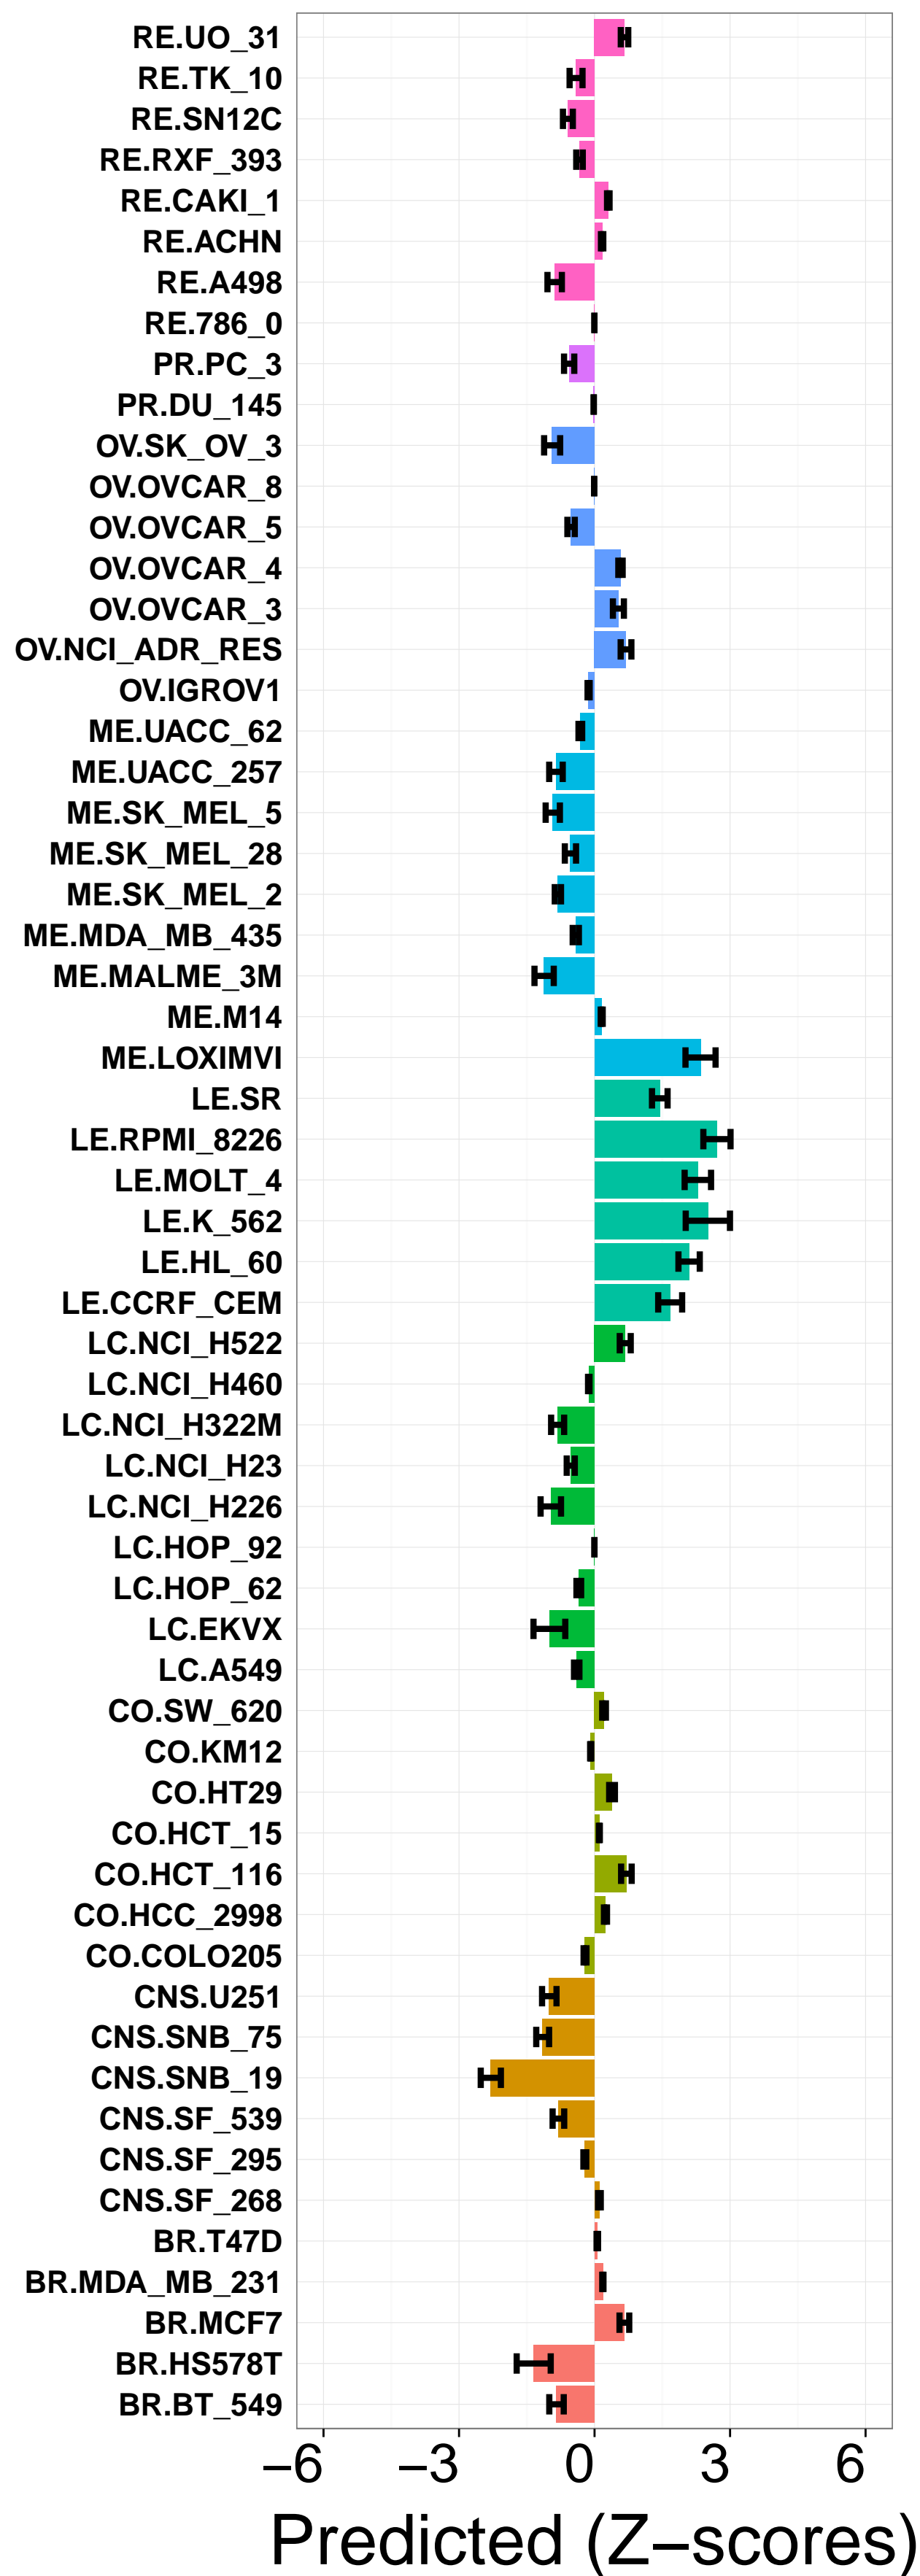

# NSC 762, Mechlorethamine\_Hydrochloride (Interpolation)

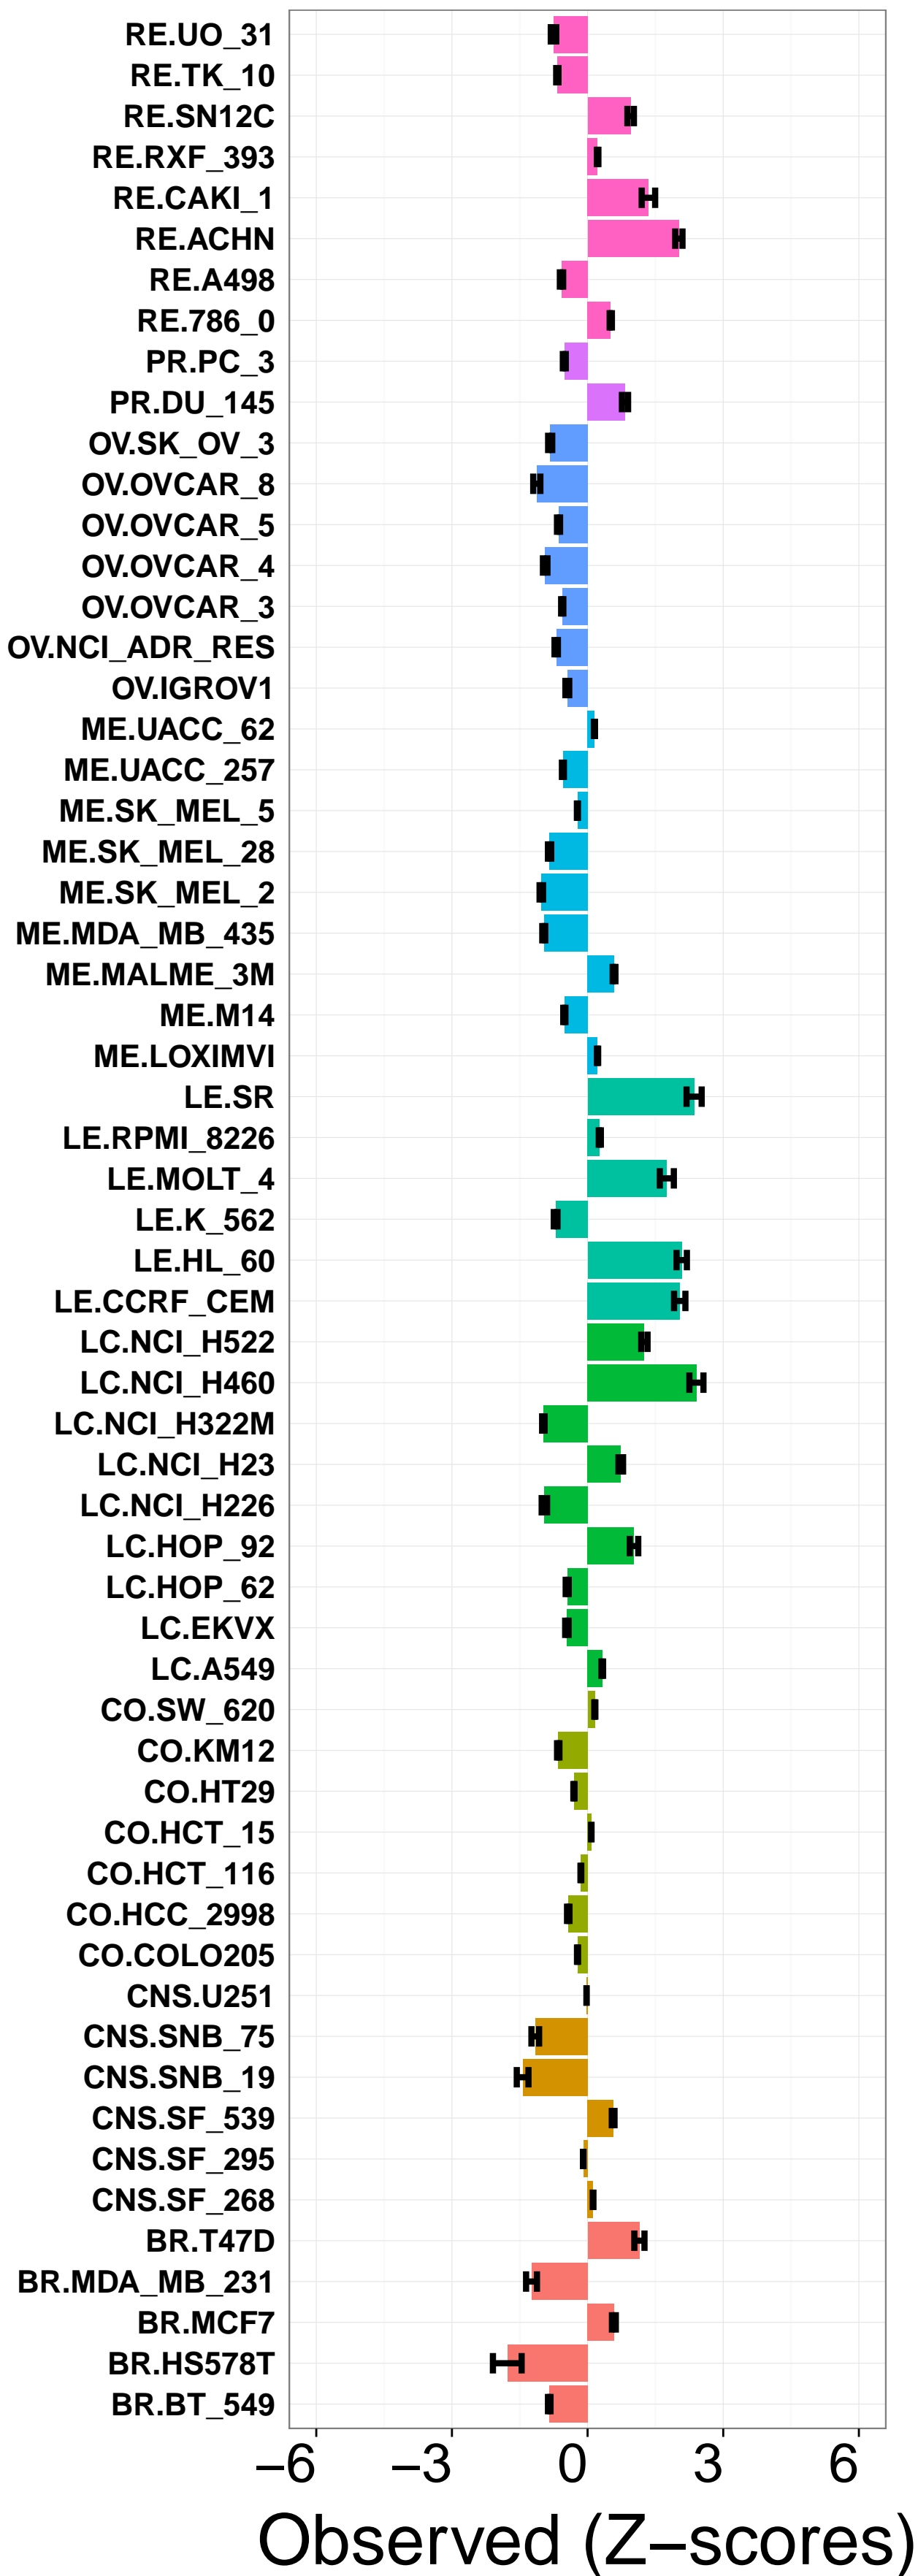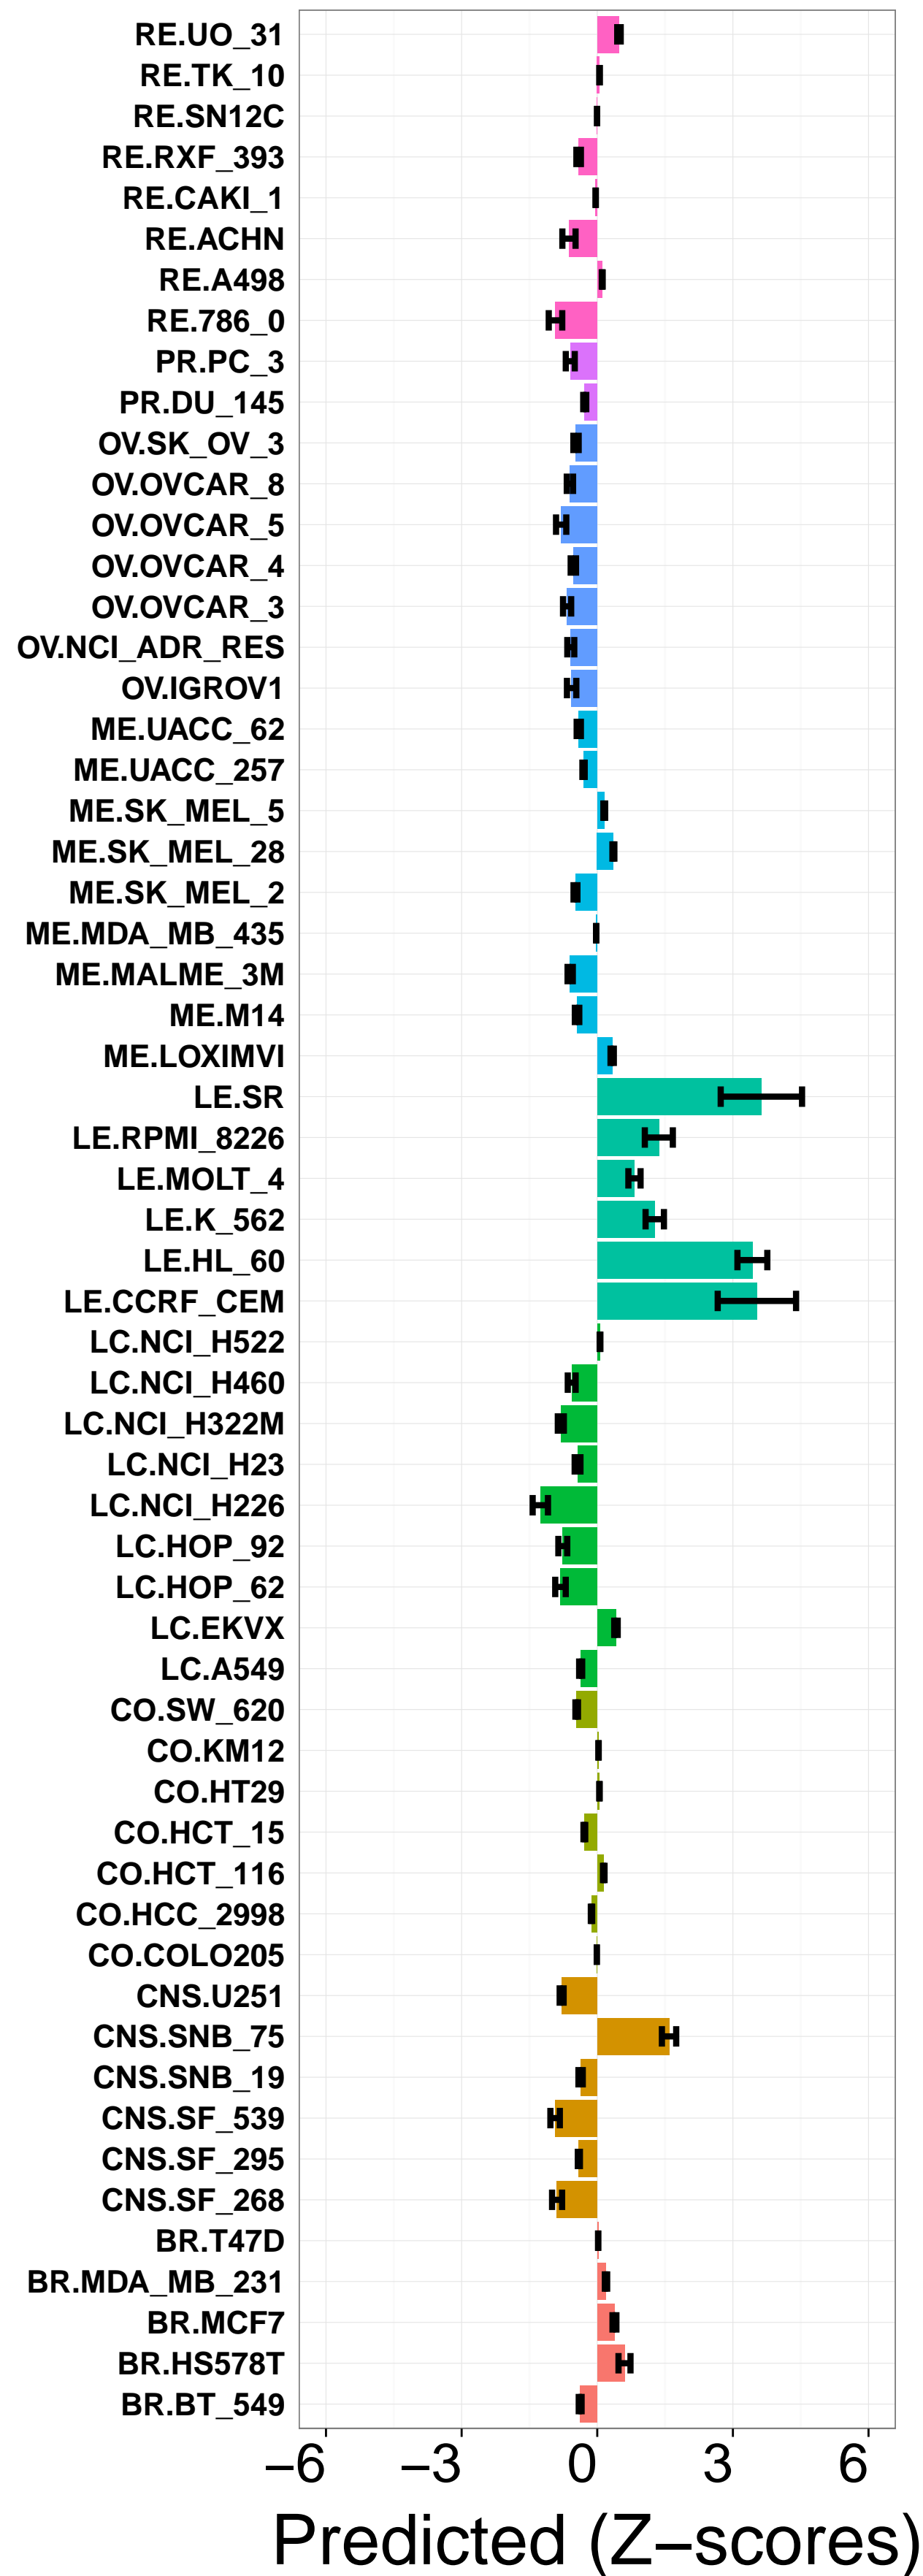

# NSC 105014, Cladribine (LOCCO)

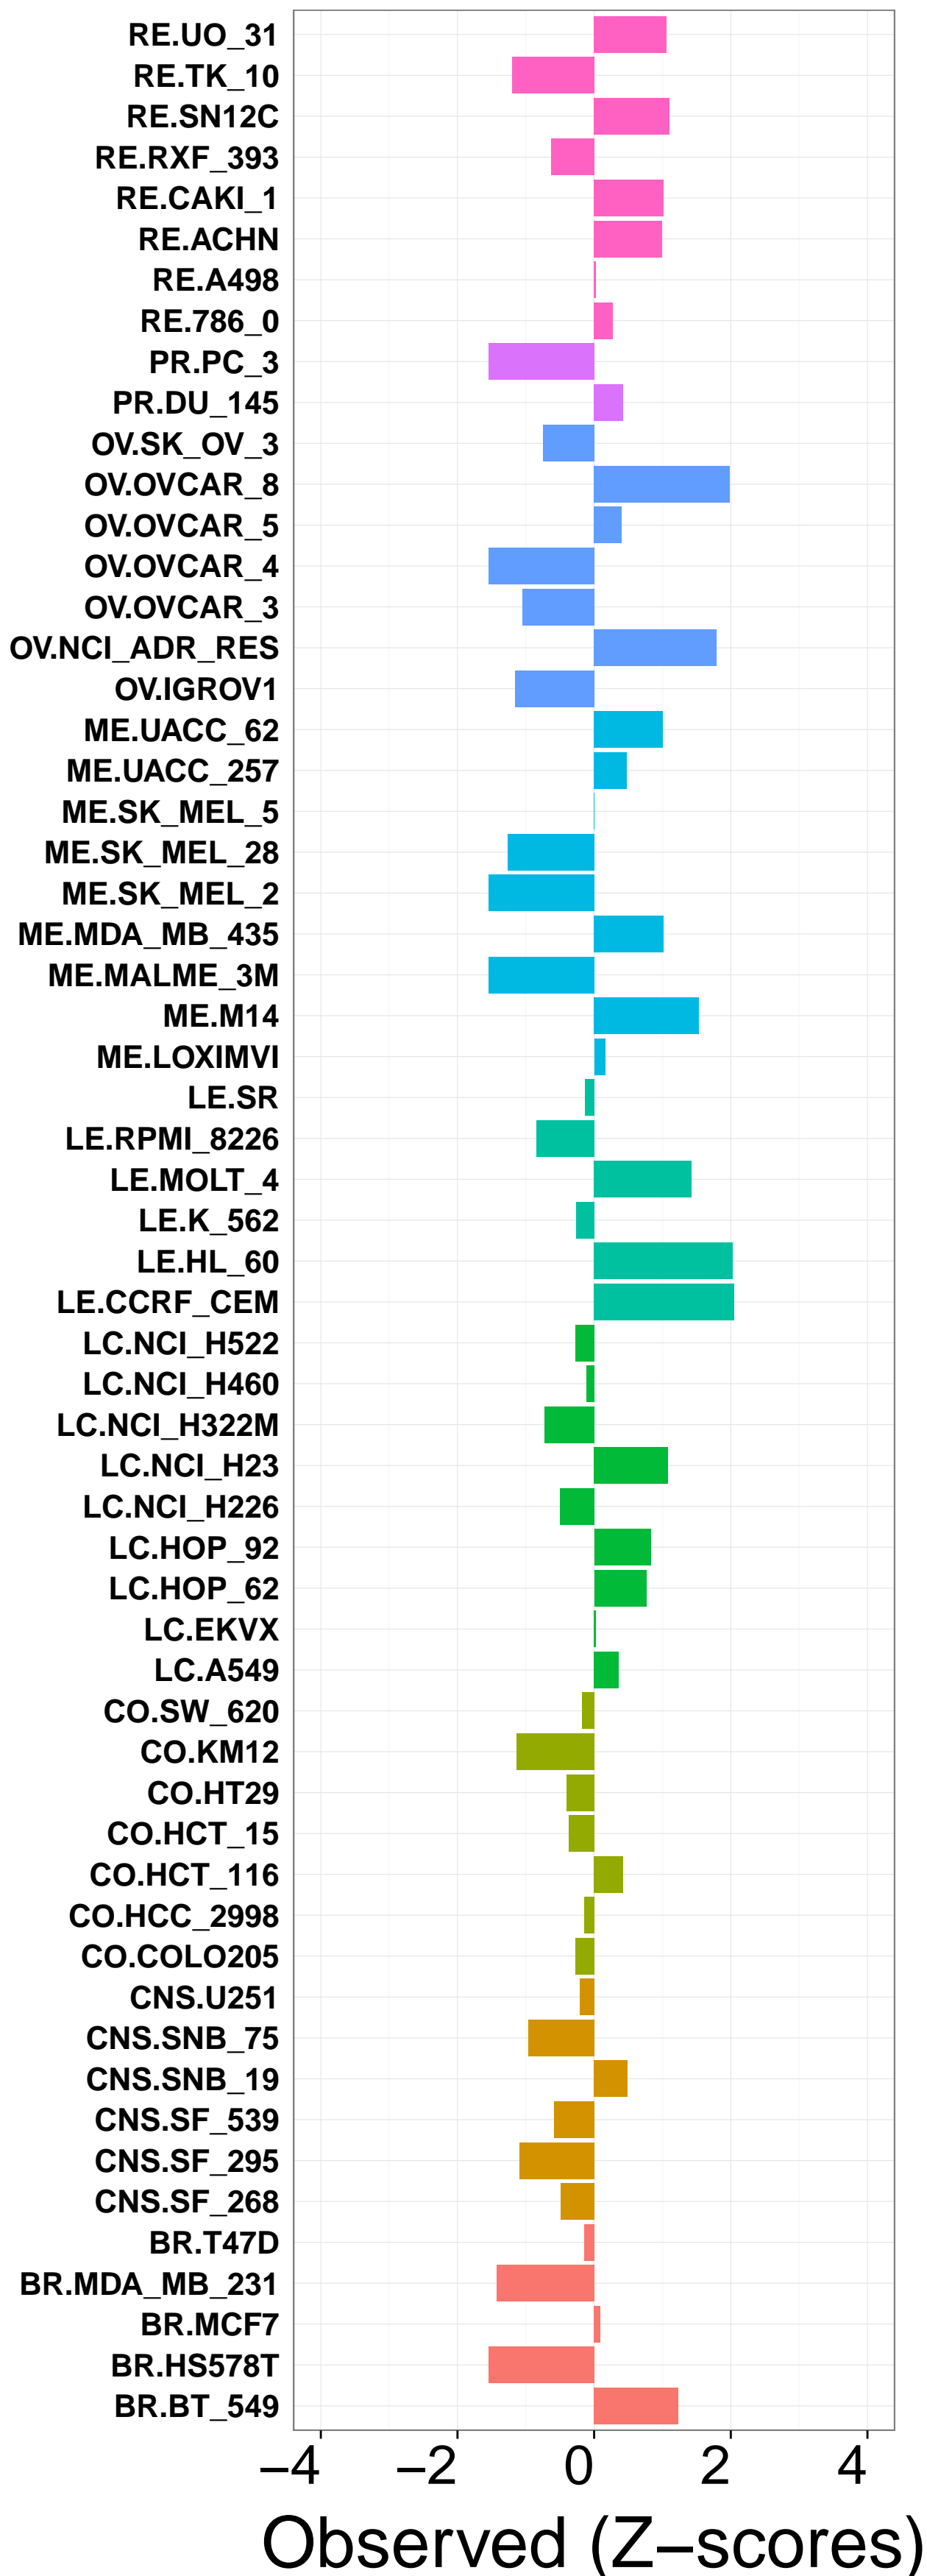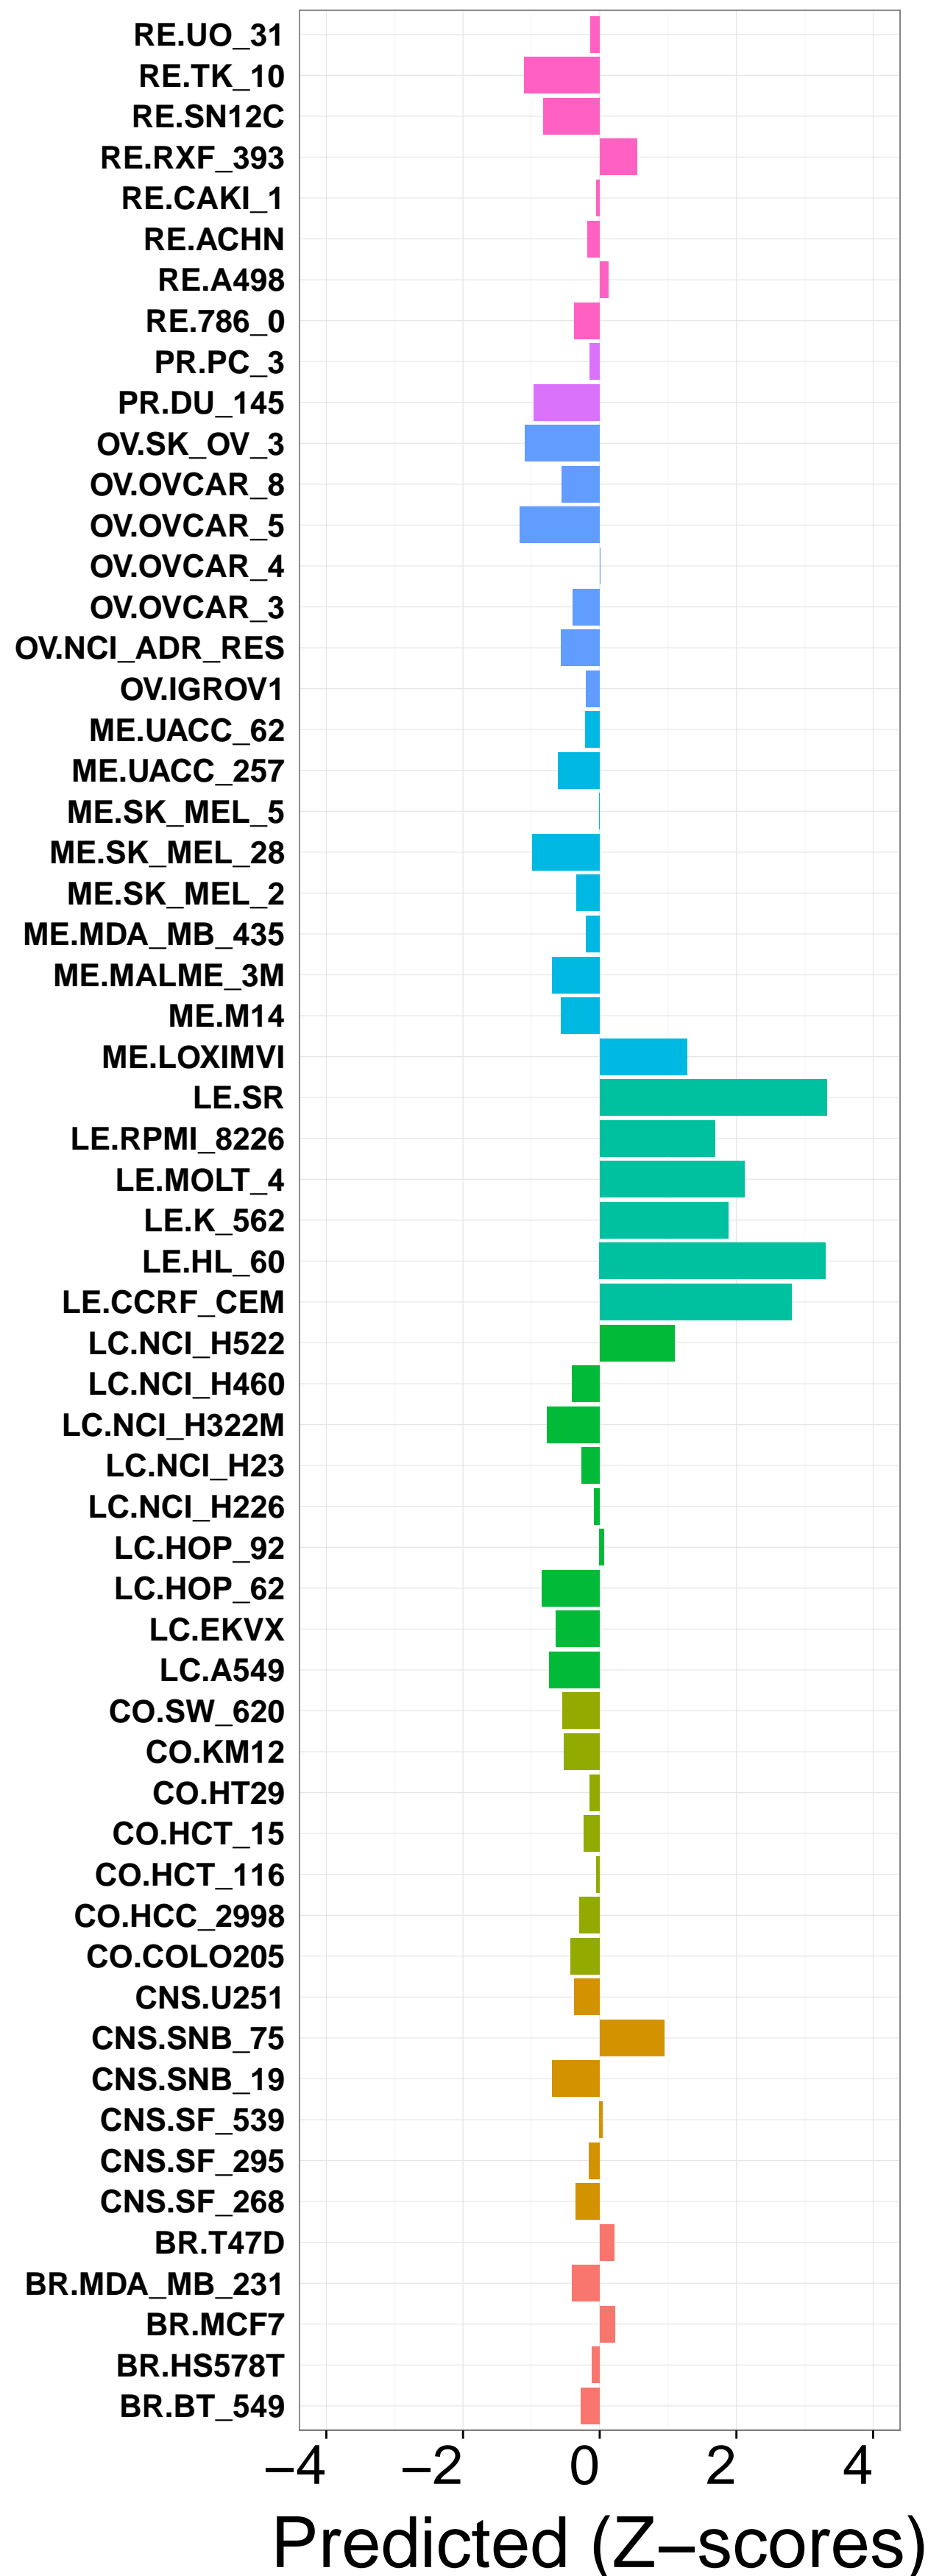

# NSC 118218, Fludarabine (LOCCO)

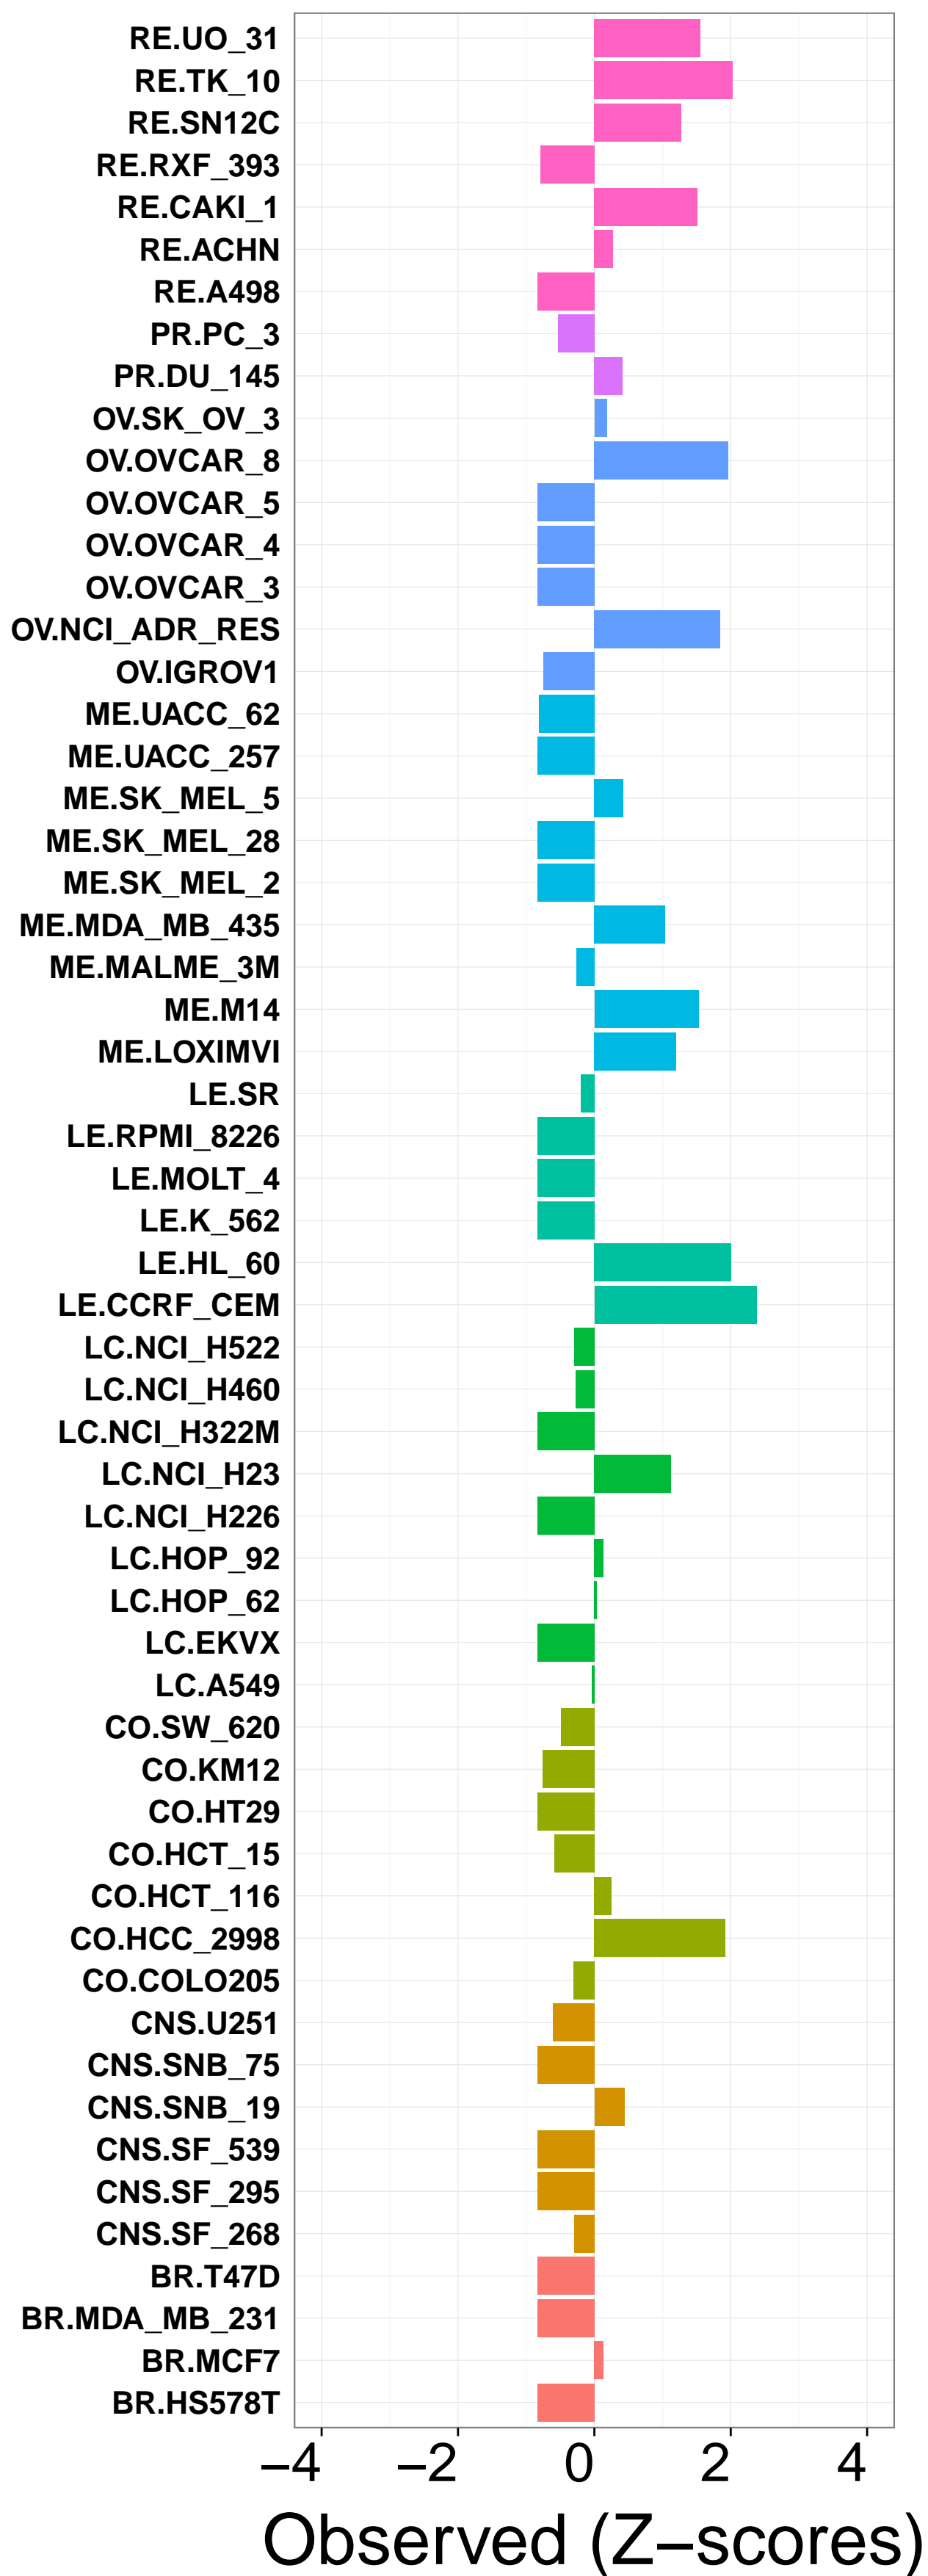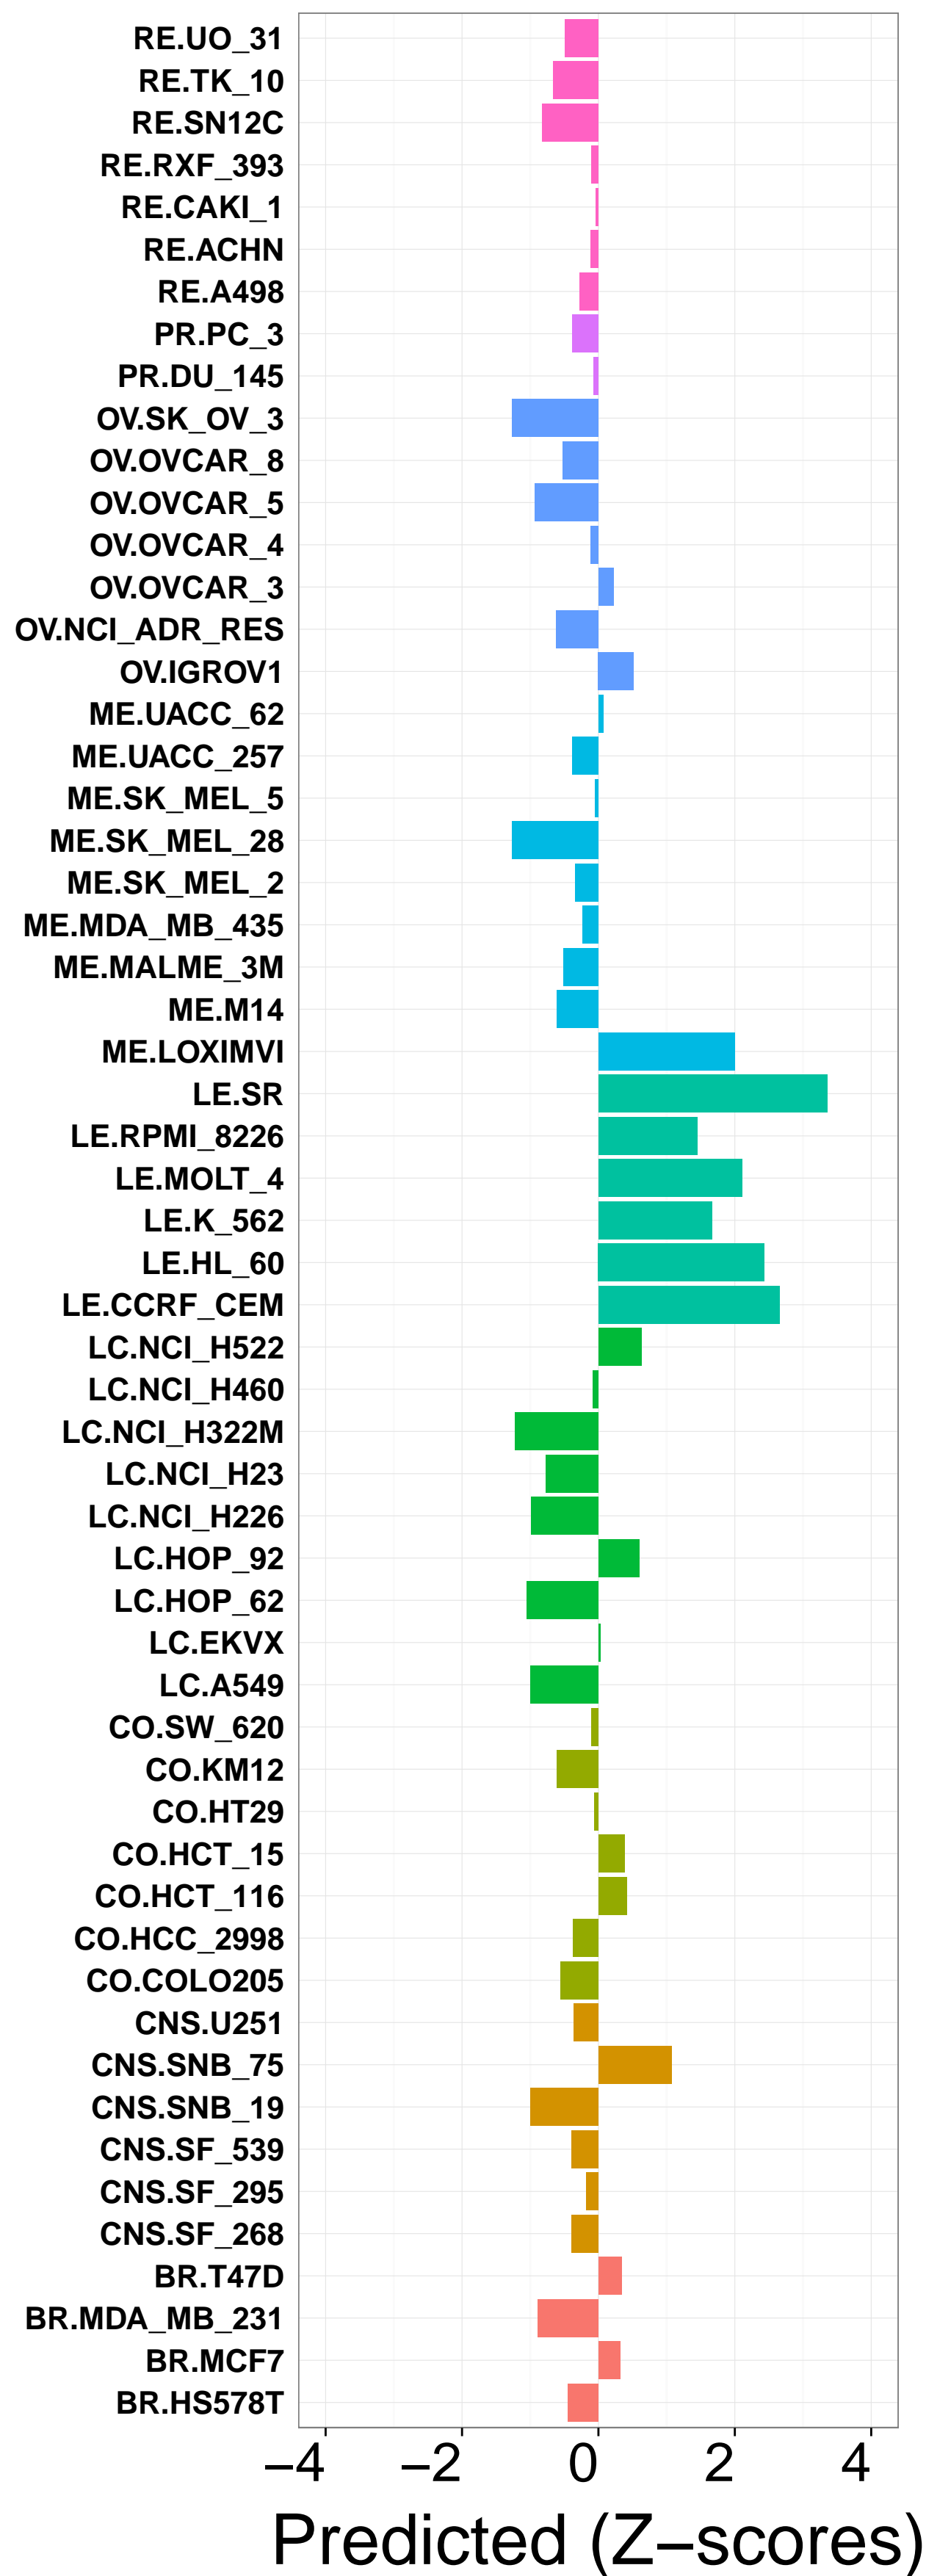



# NSC 122819, Teniposide (LOCCO)

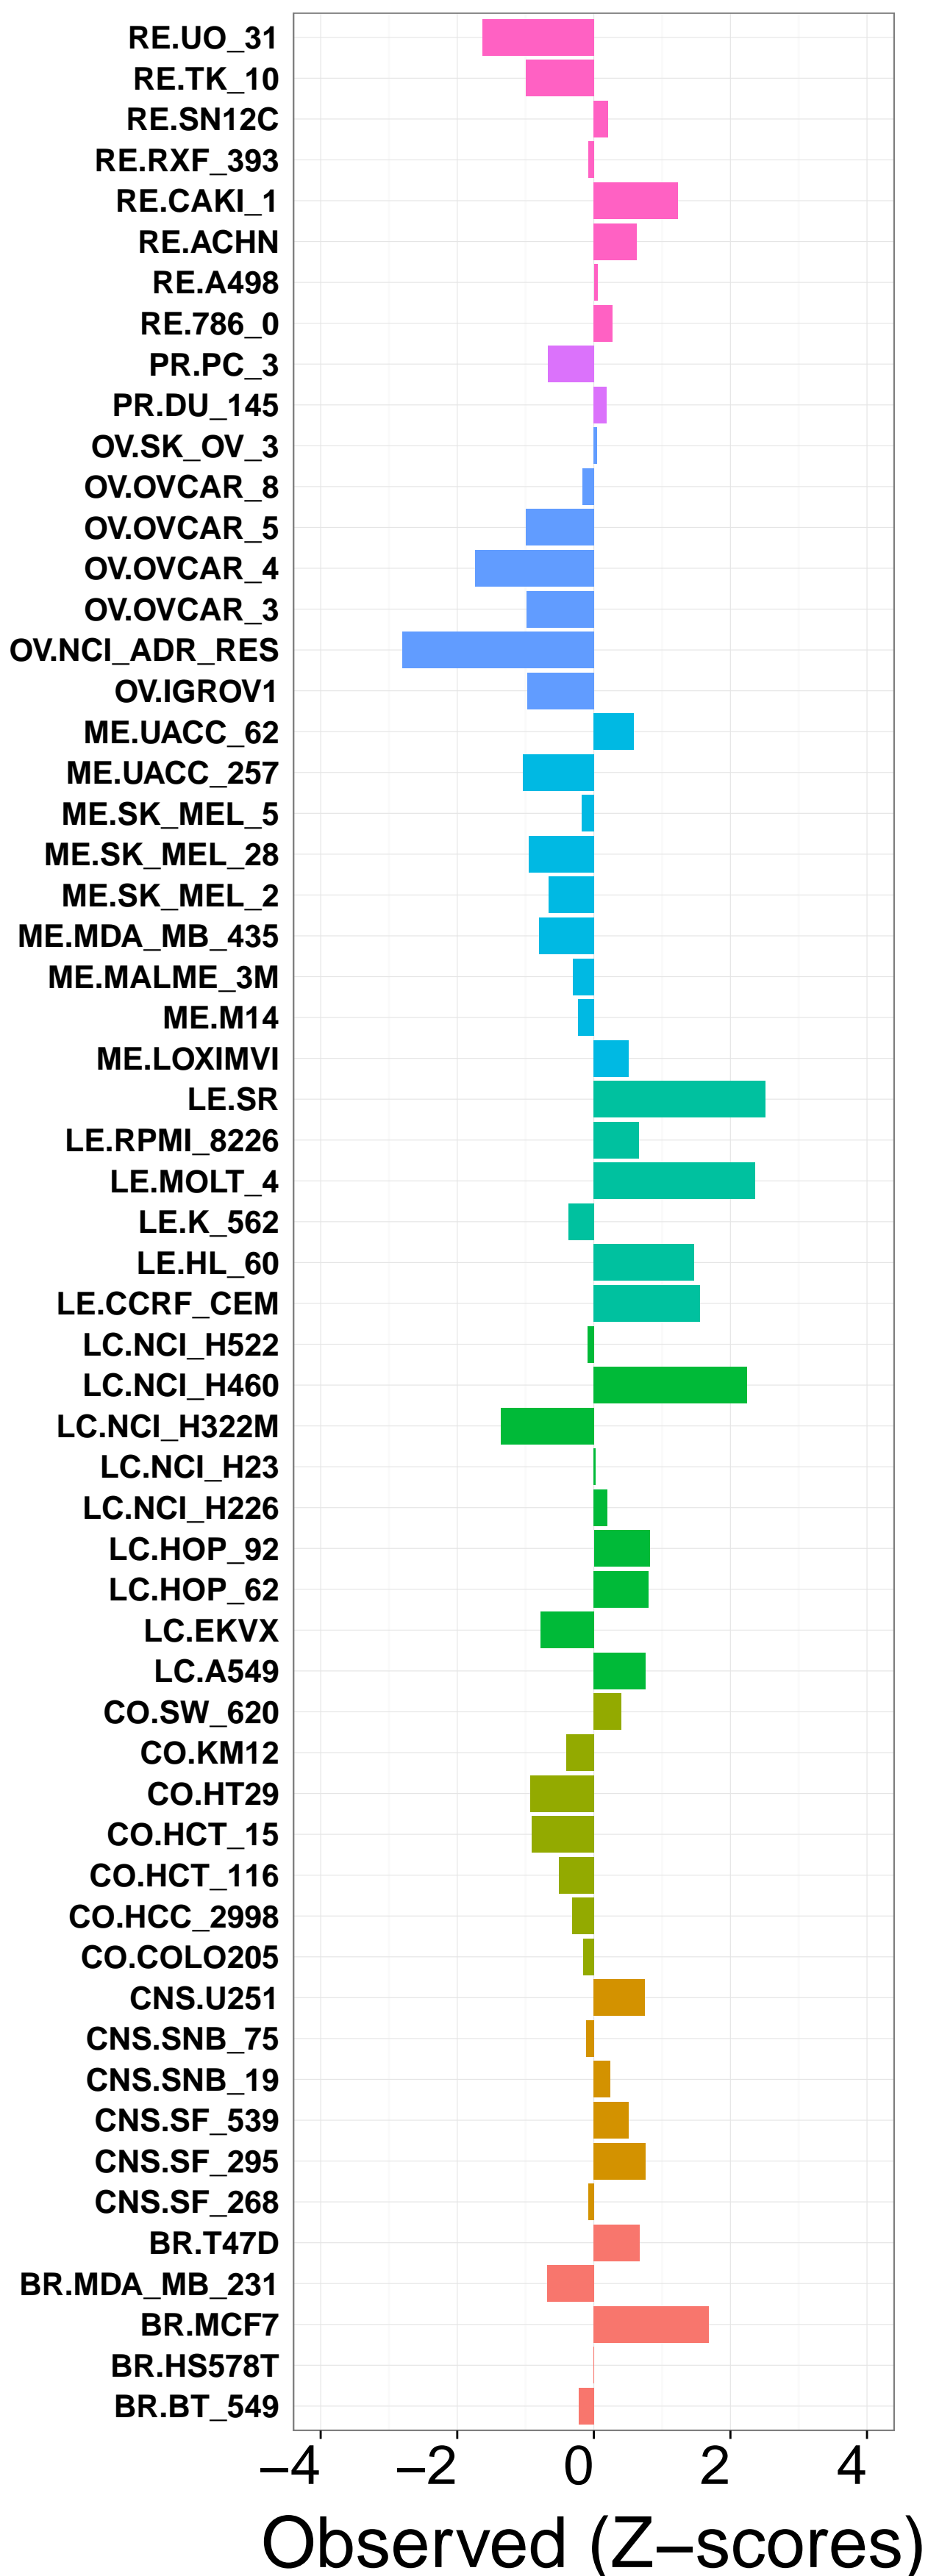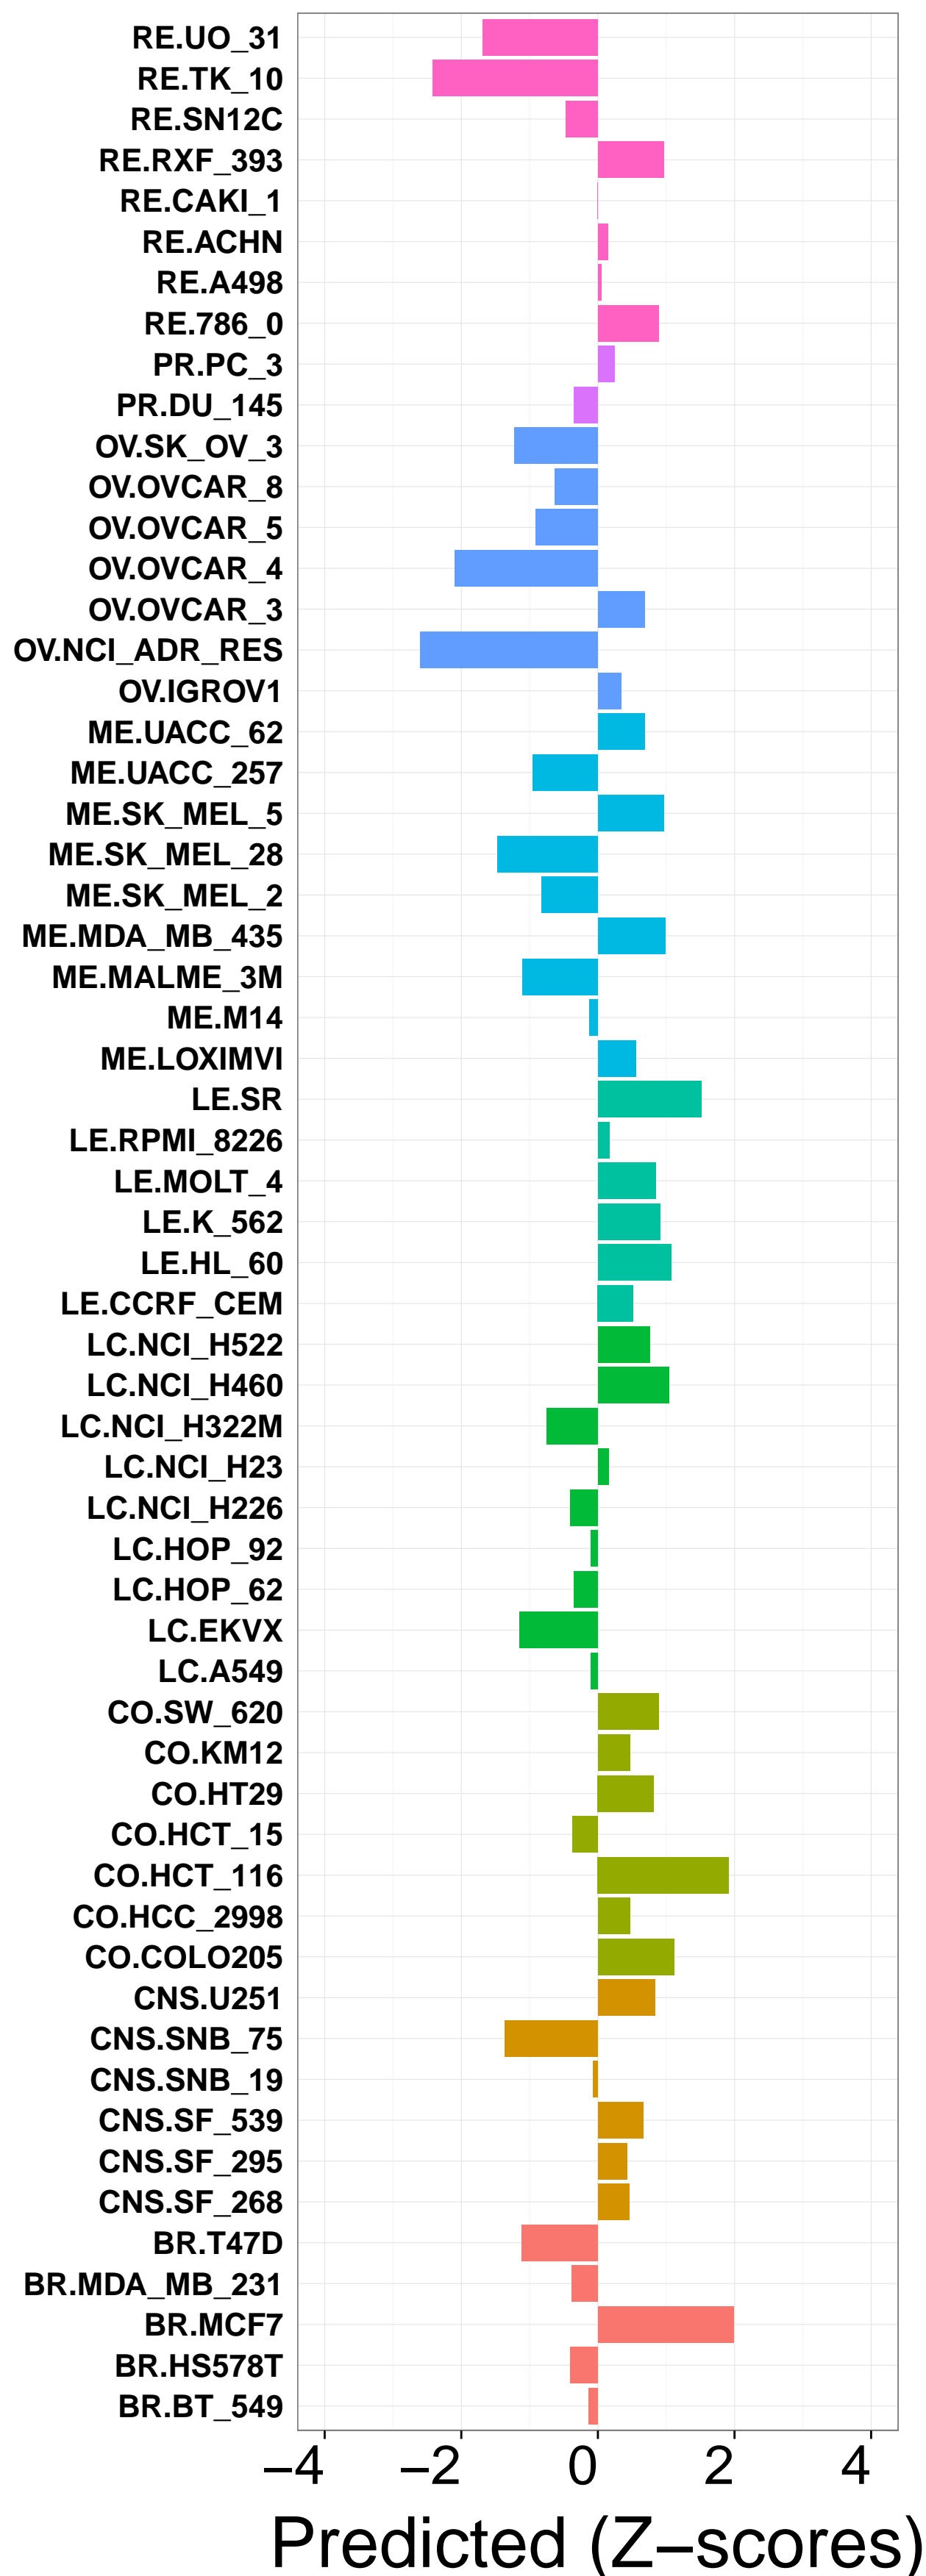

# NSC 123127, Doxorubicin\_Hydrochloride (LOCCO)

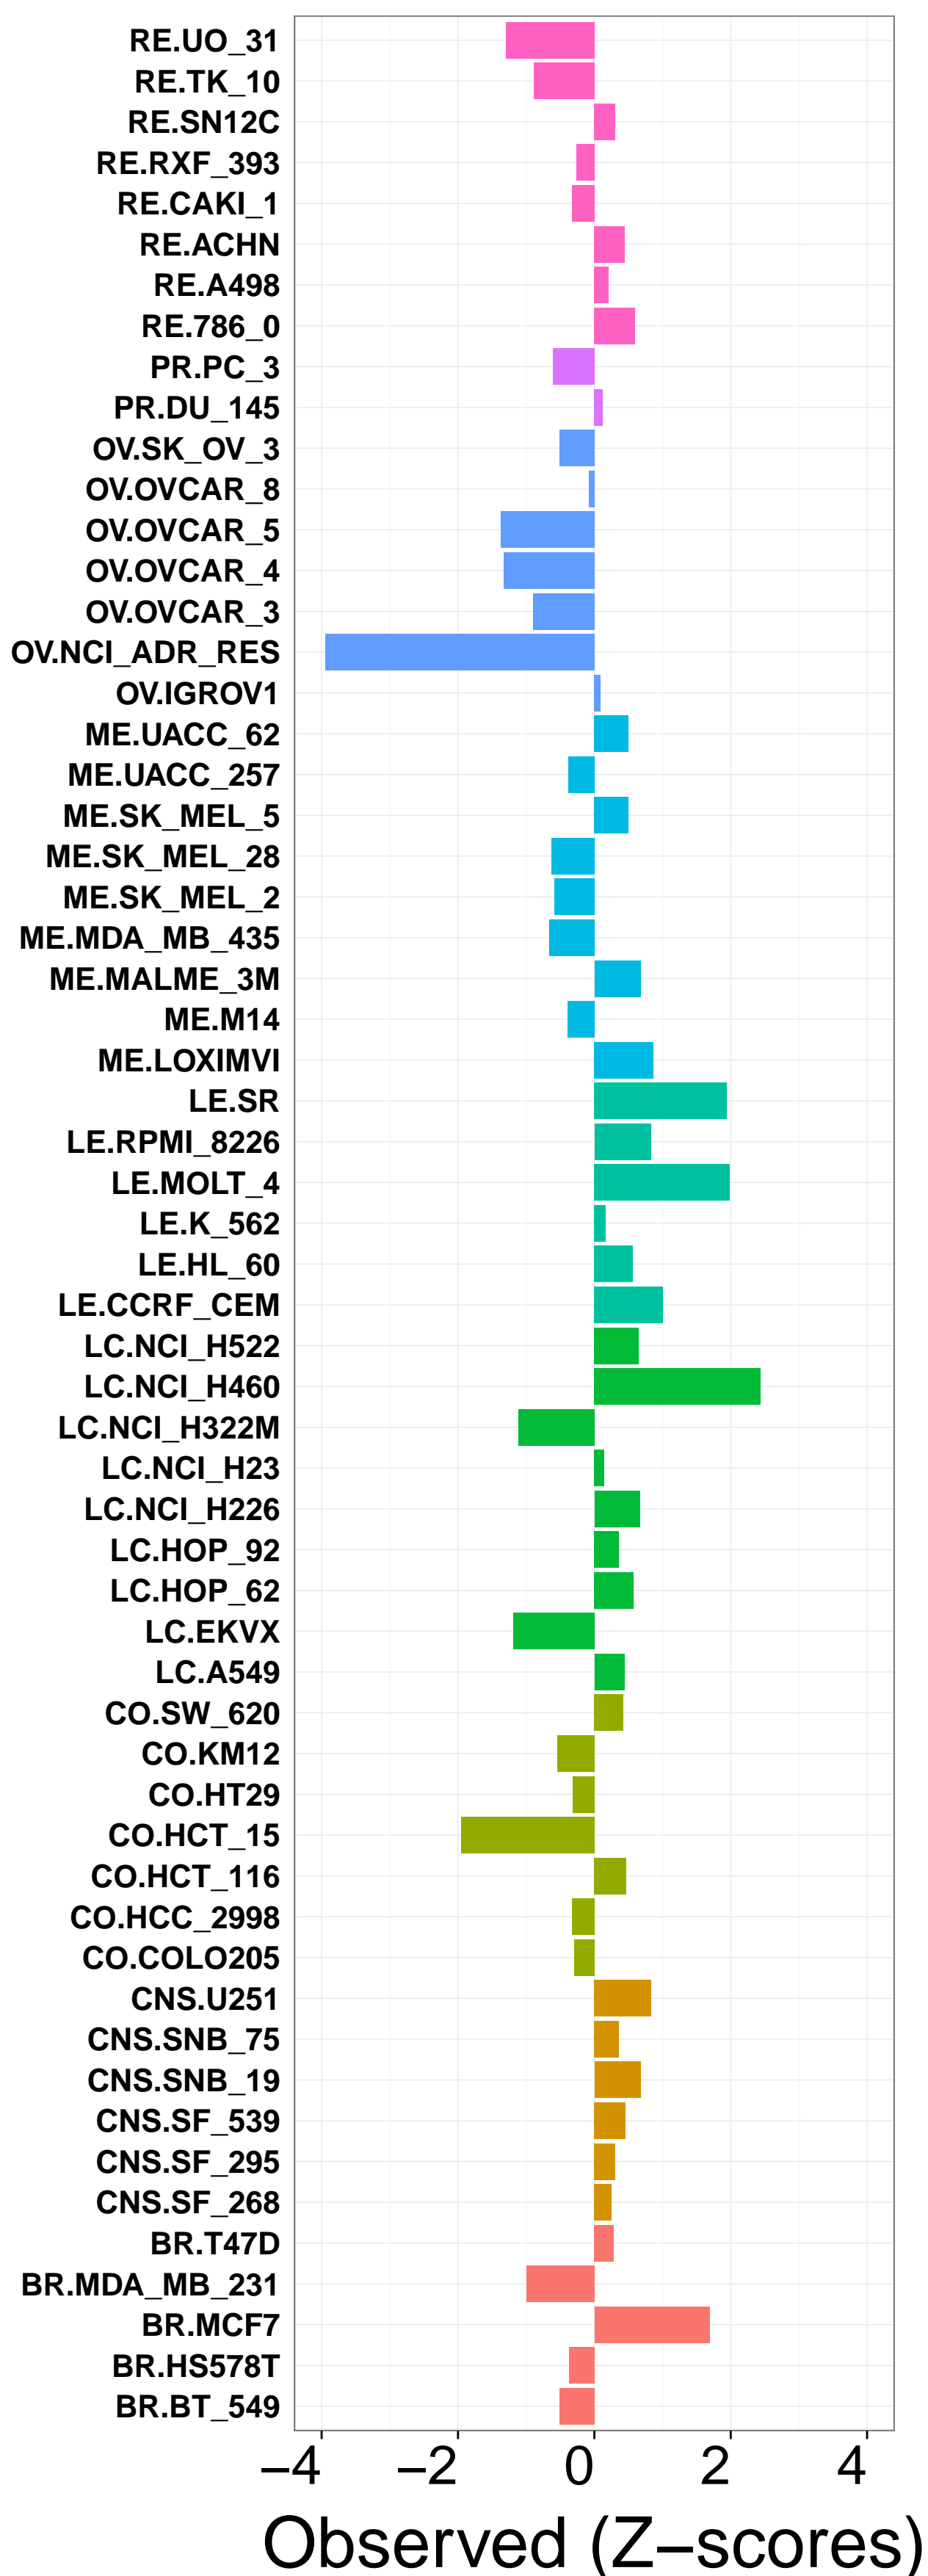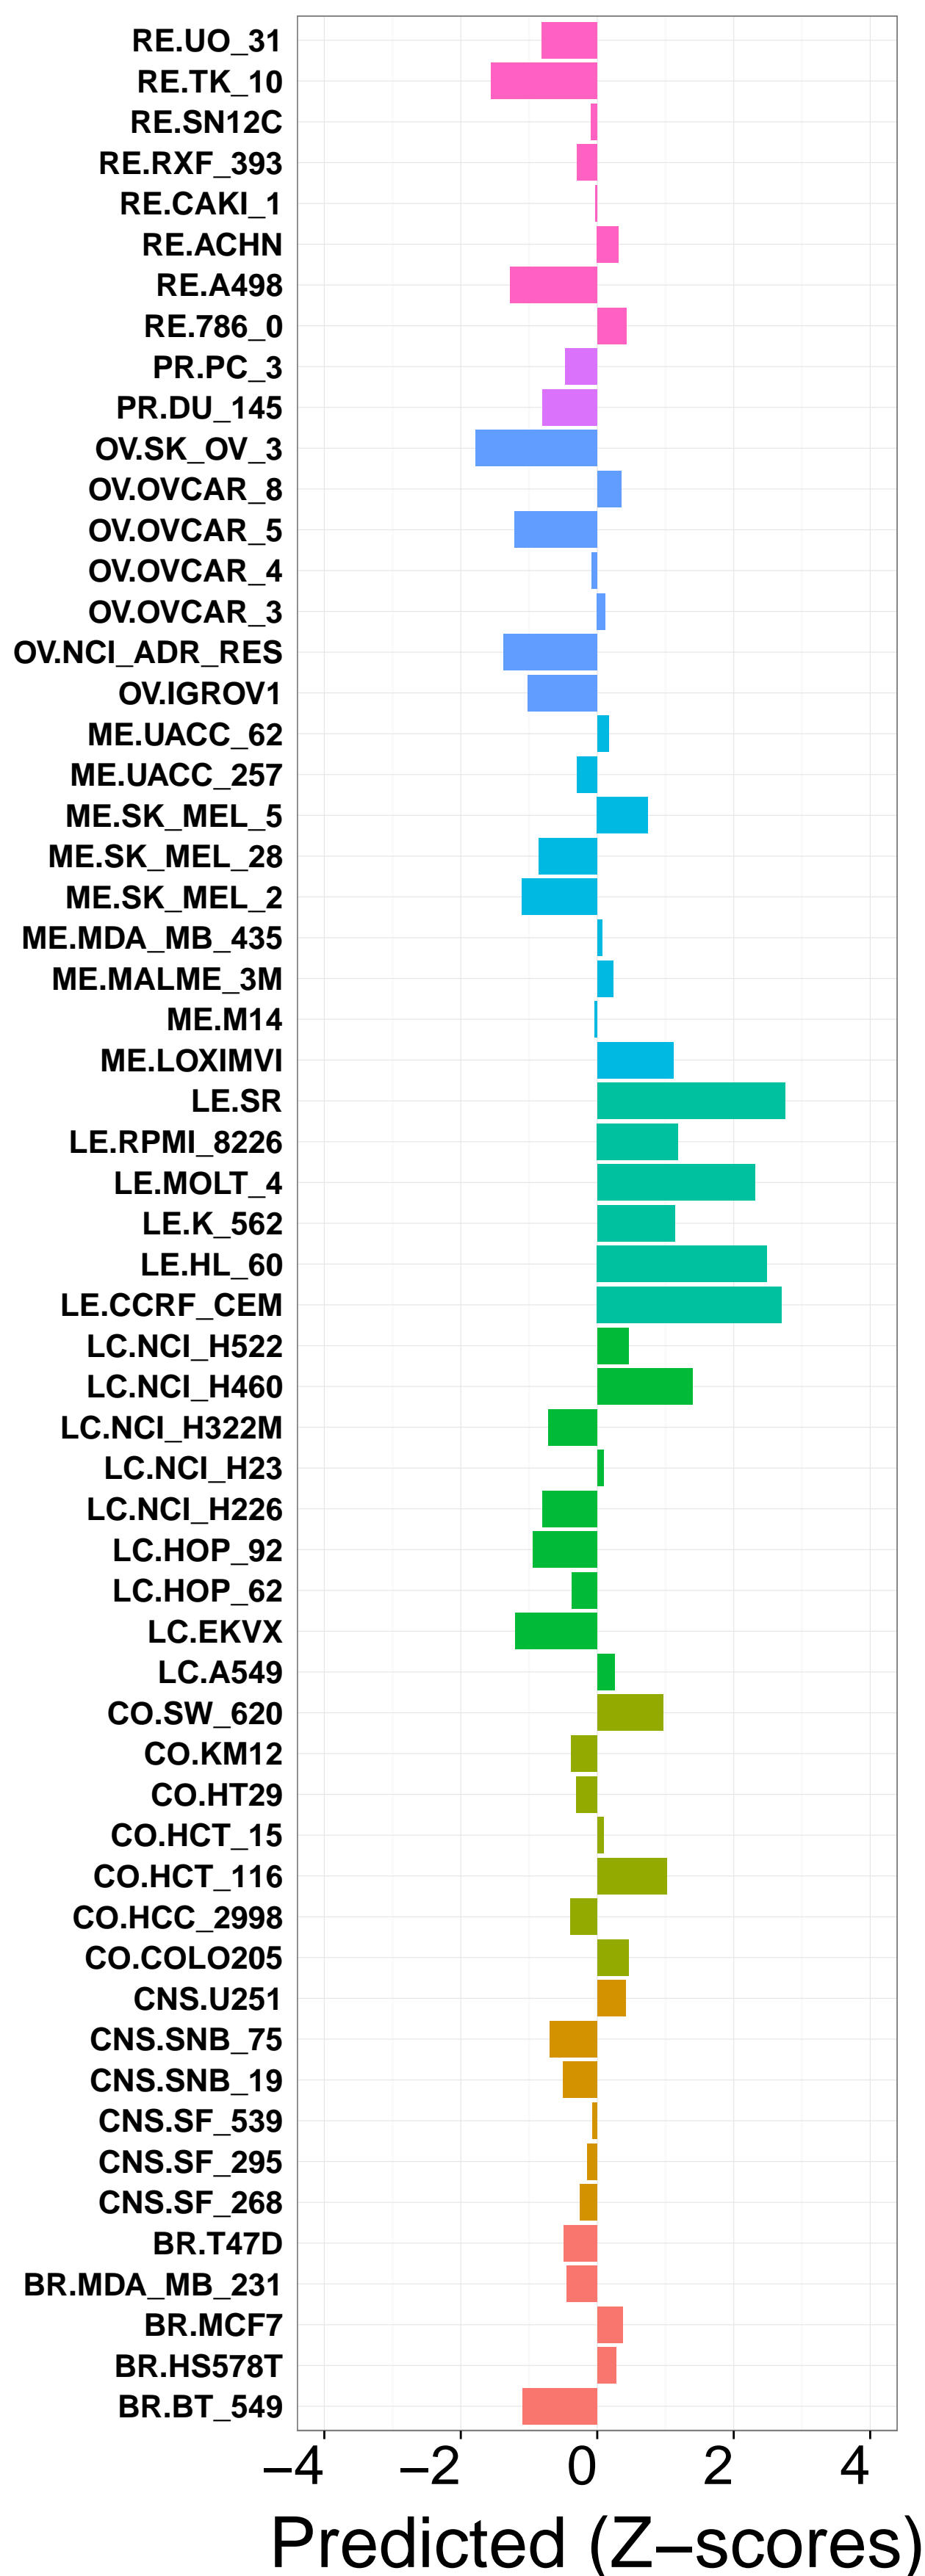

# NSC 125973, (LOCCO)

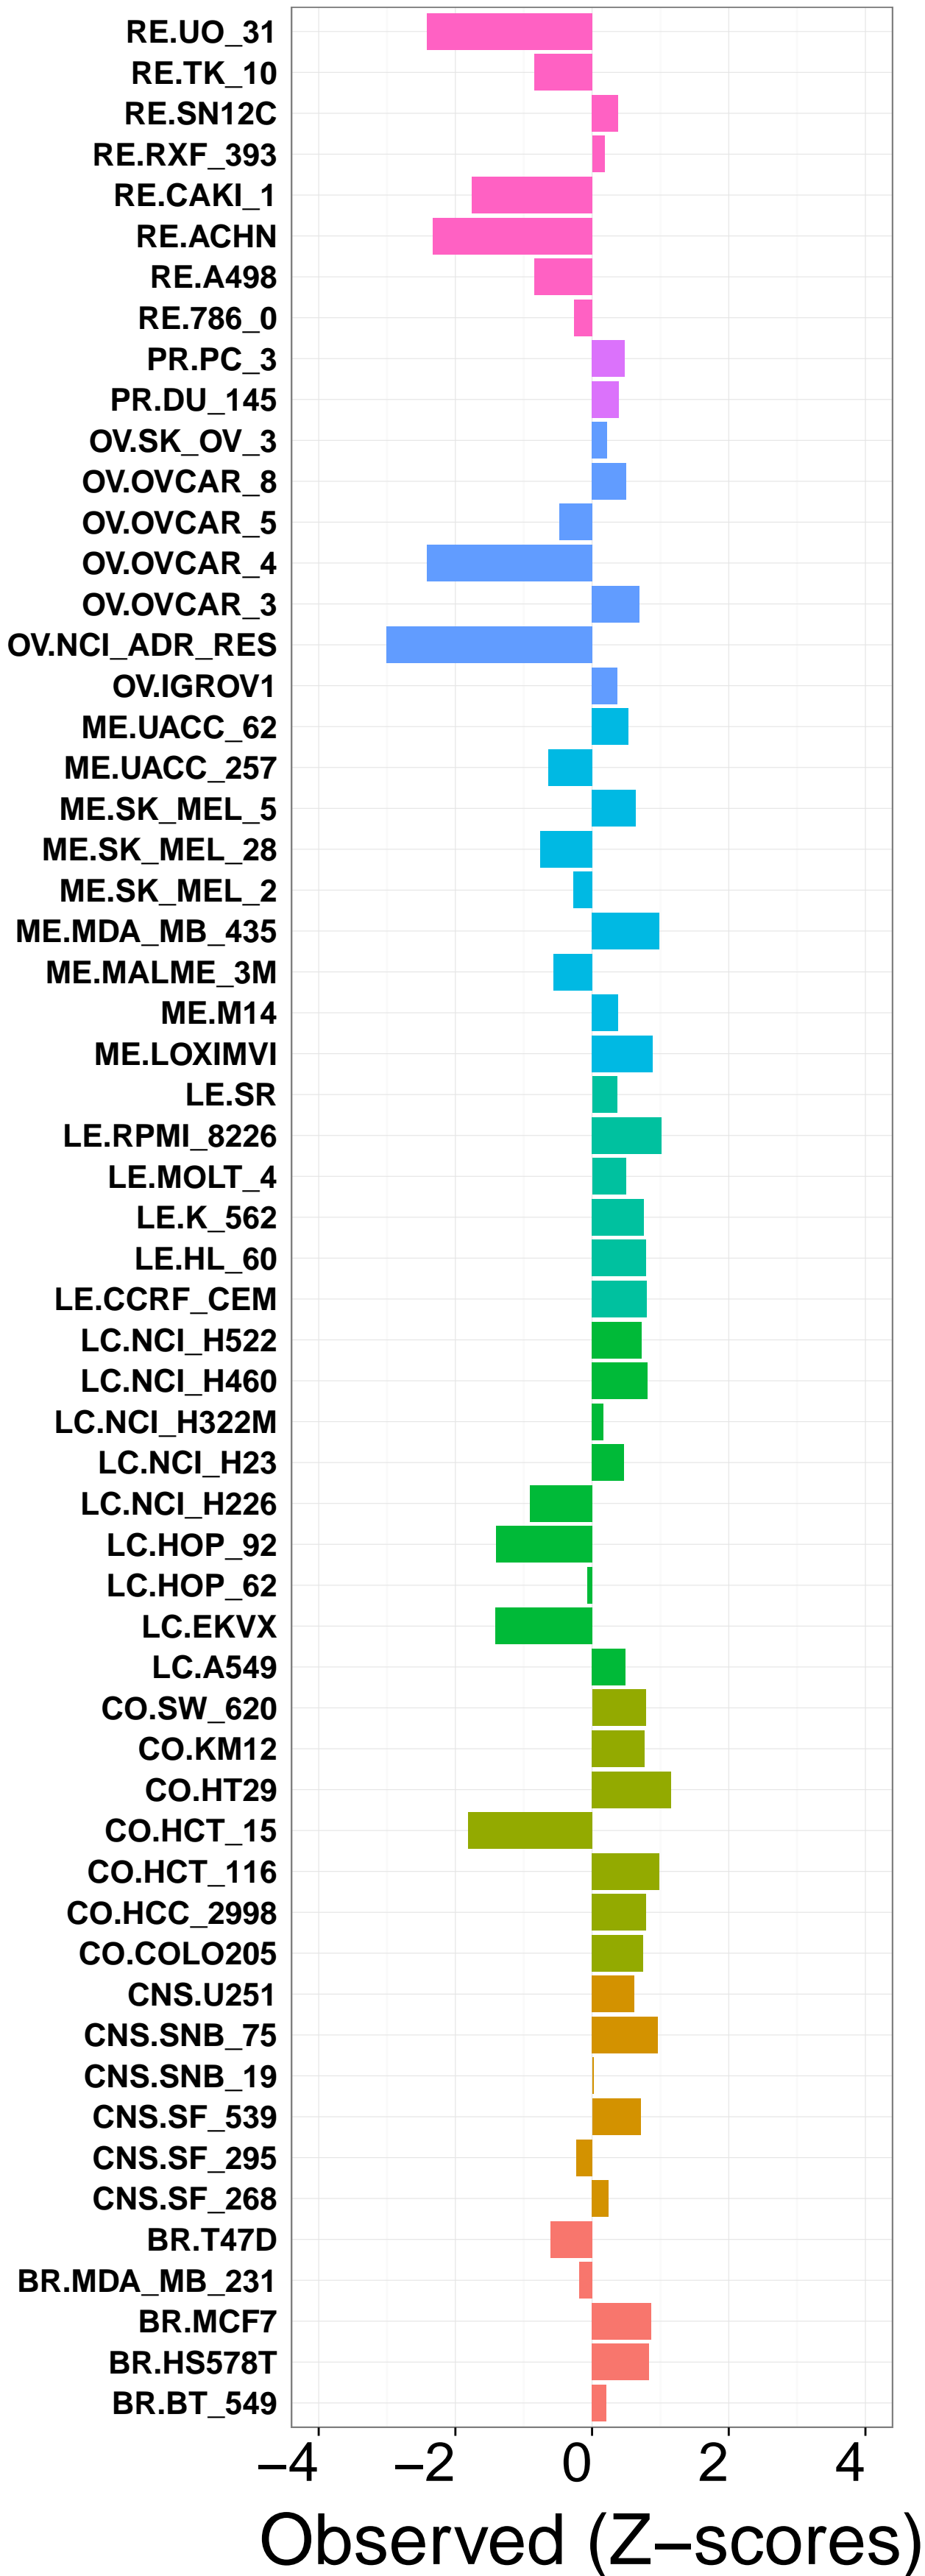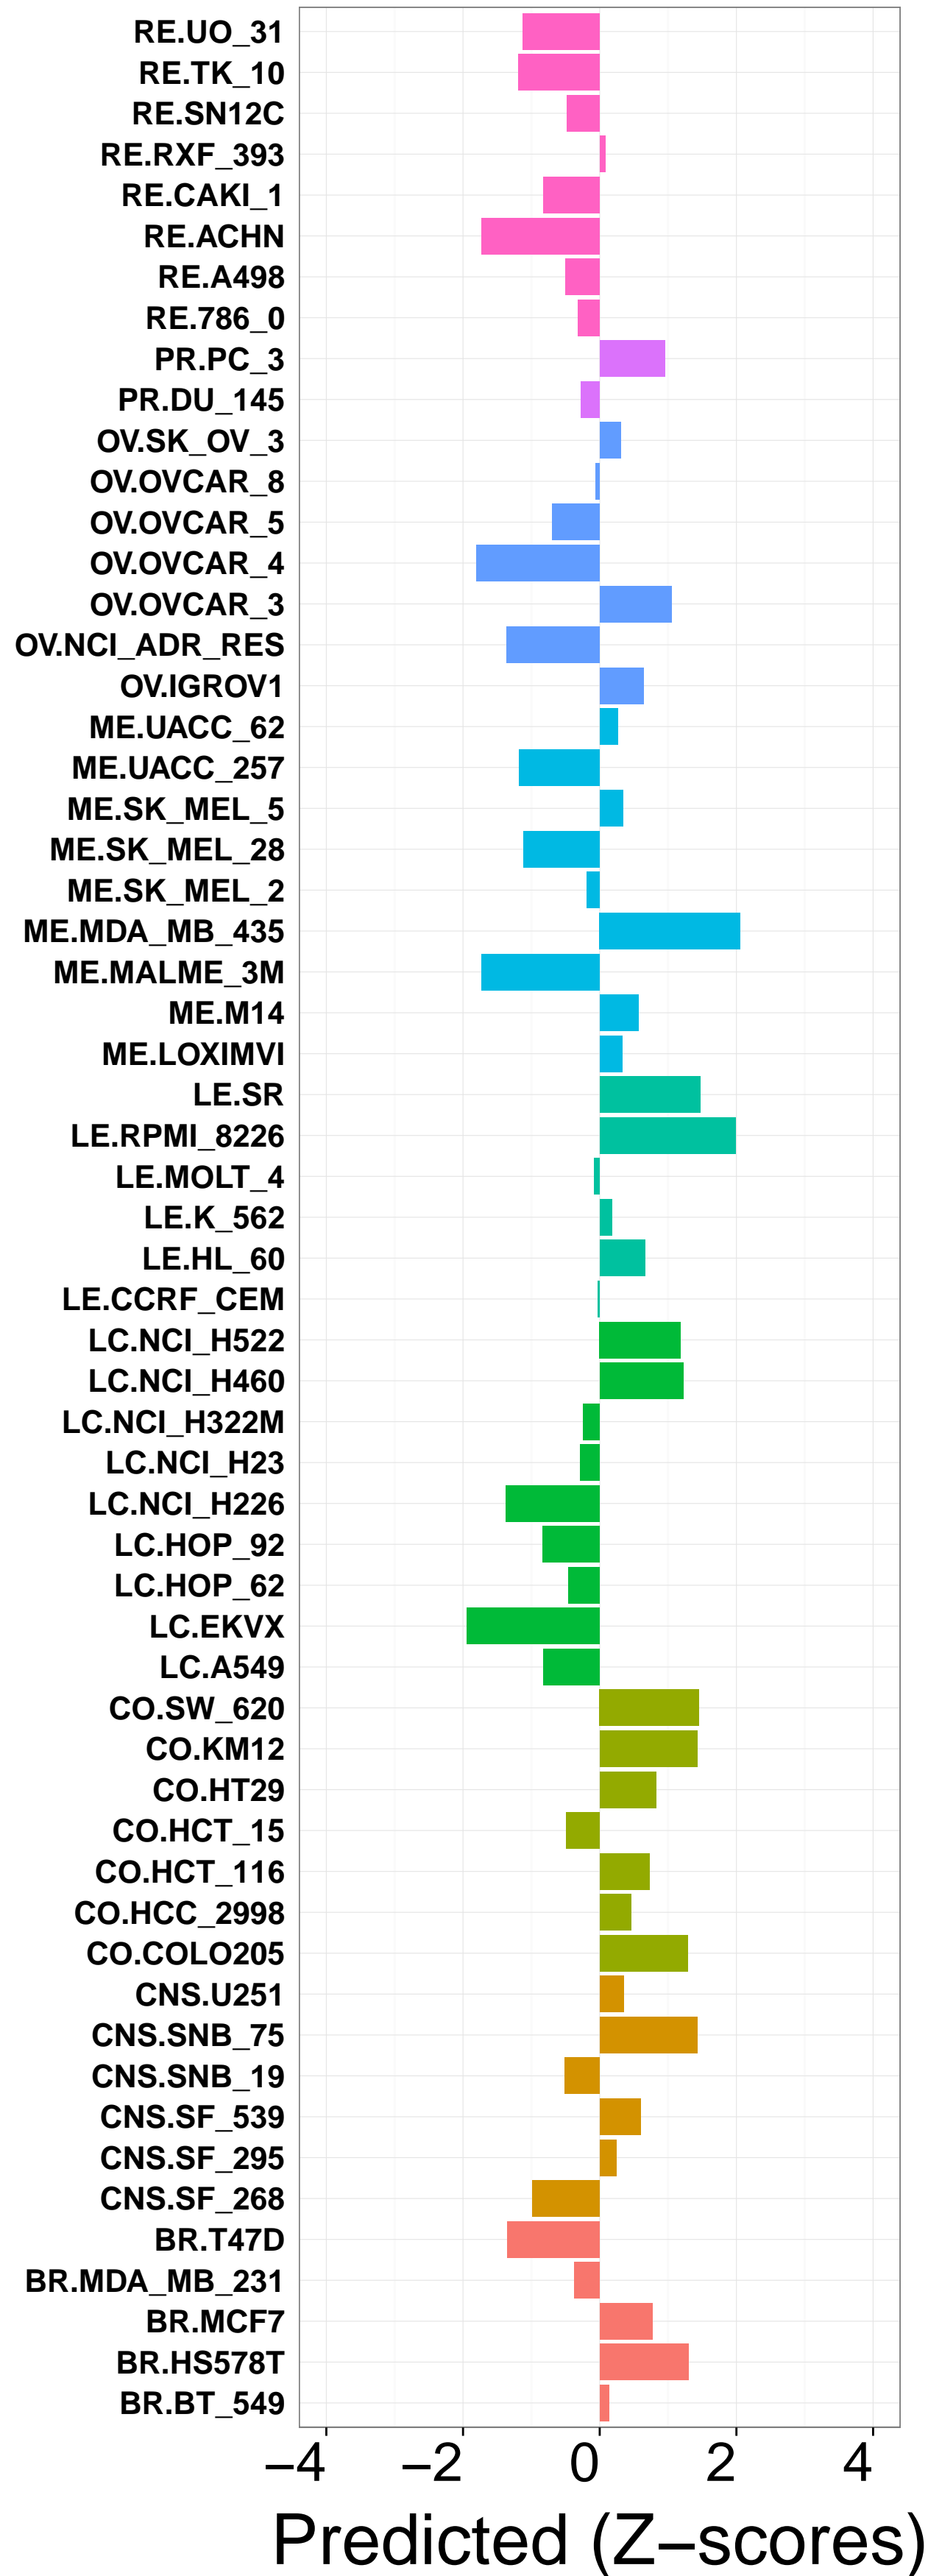

# NSC 127716, Decitabine (LOCCO)

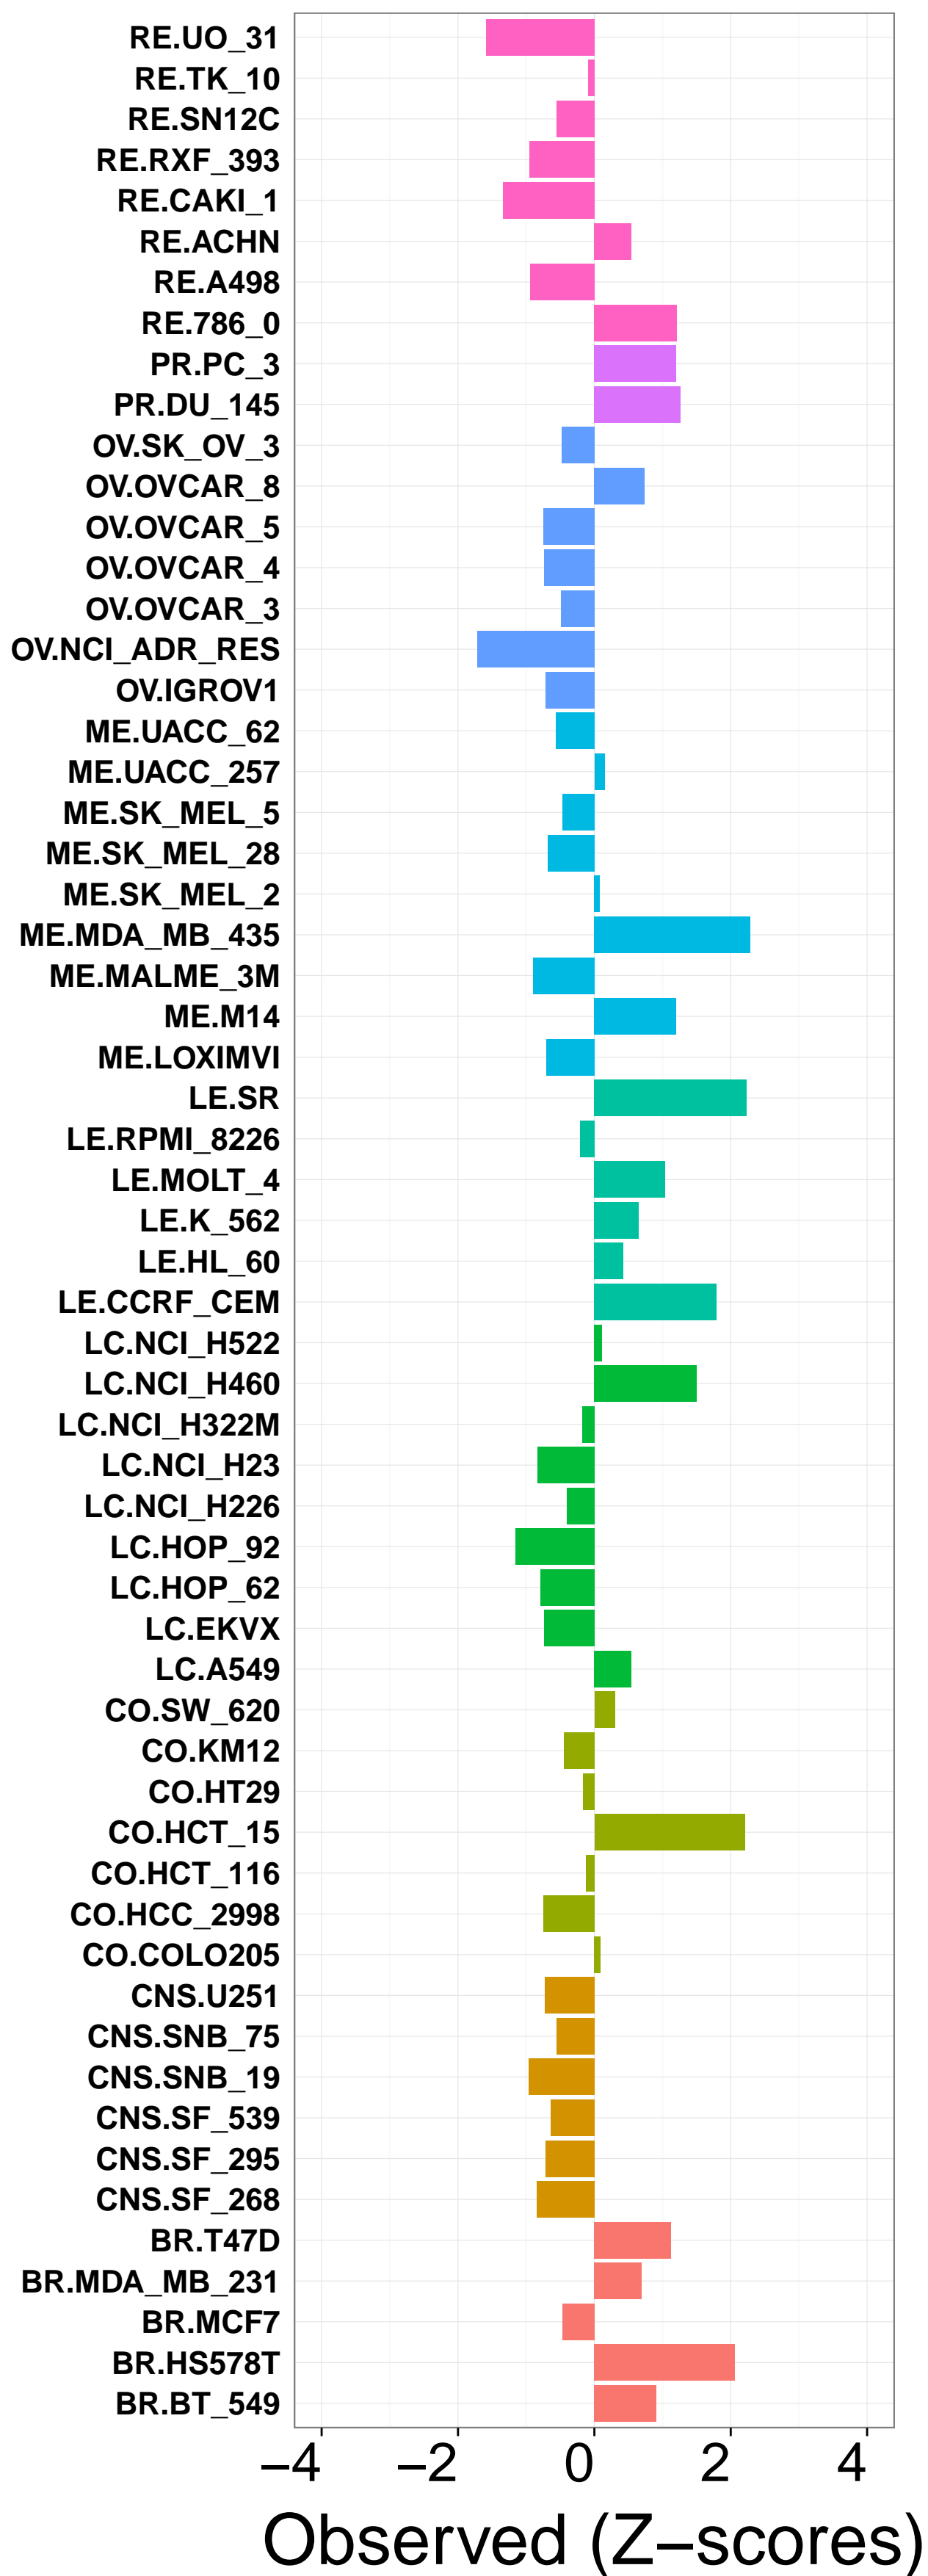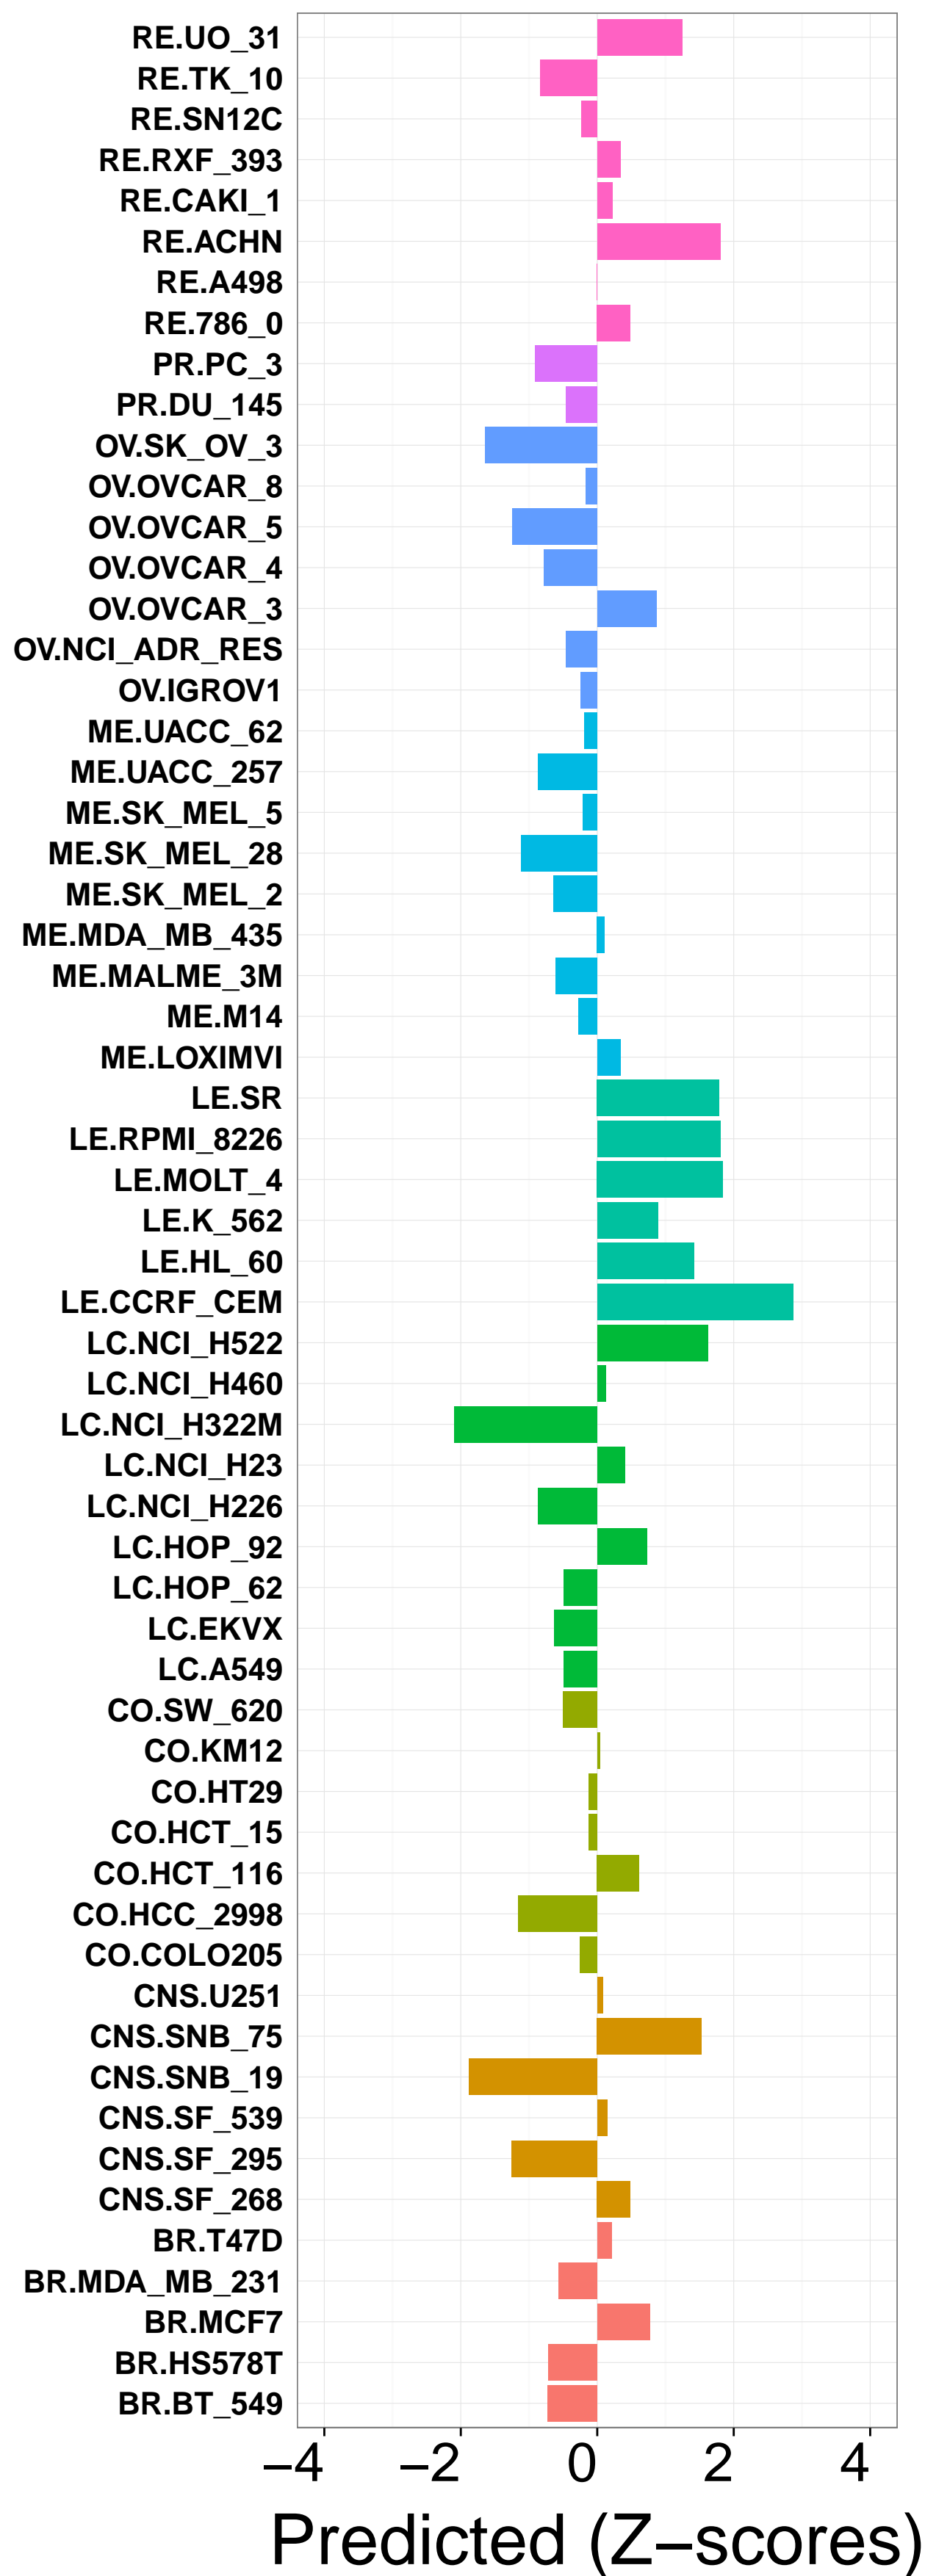

# NSC 141540, (LOCCO)

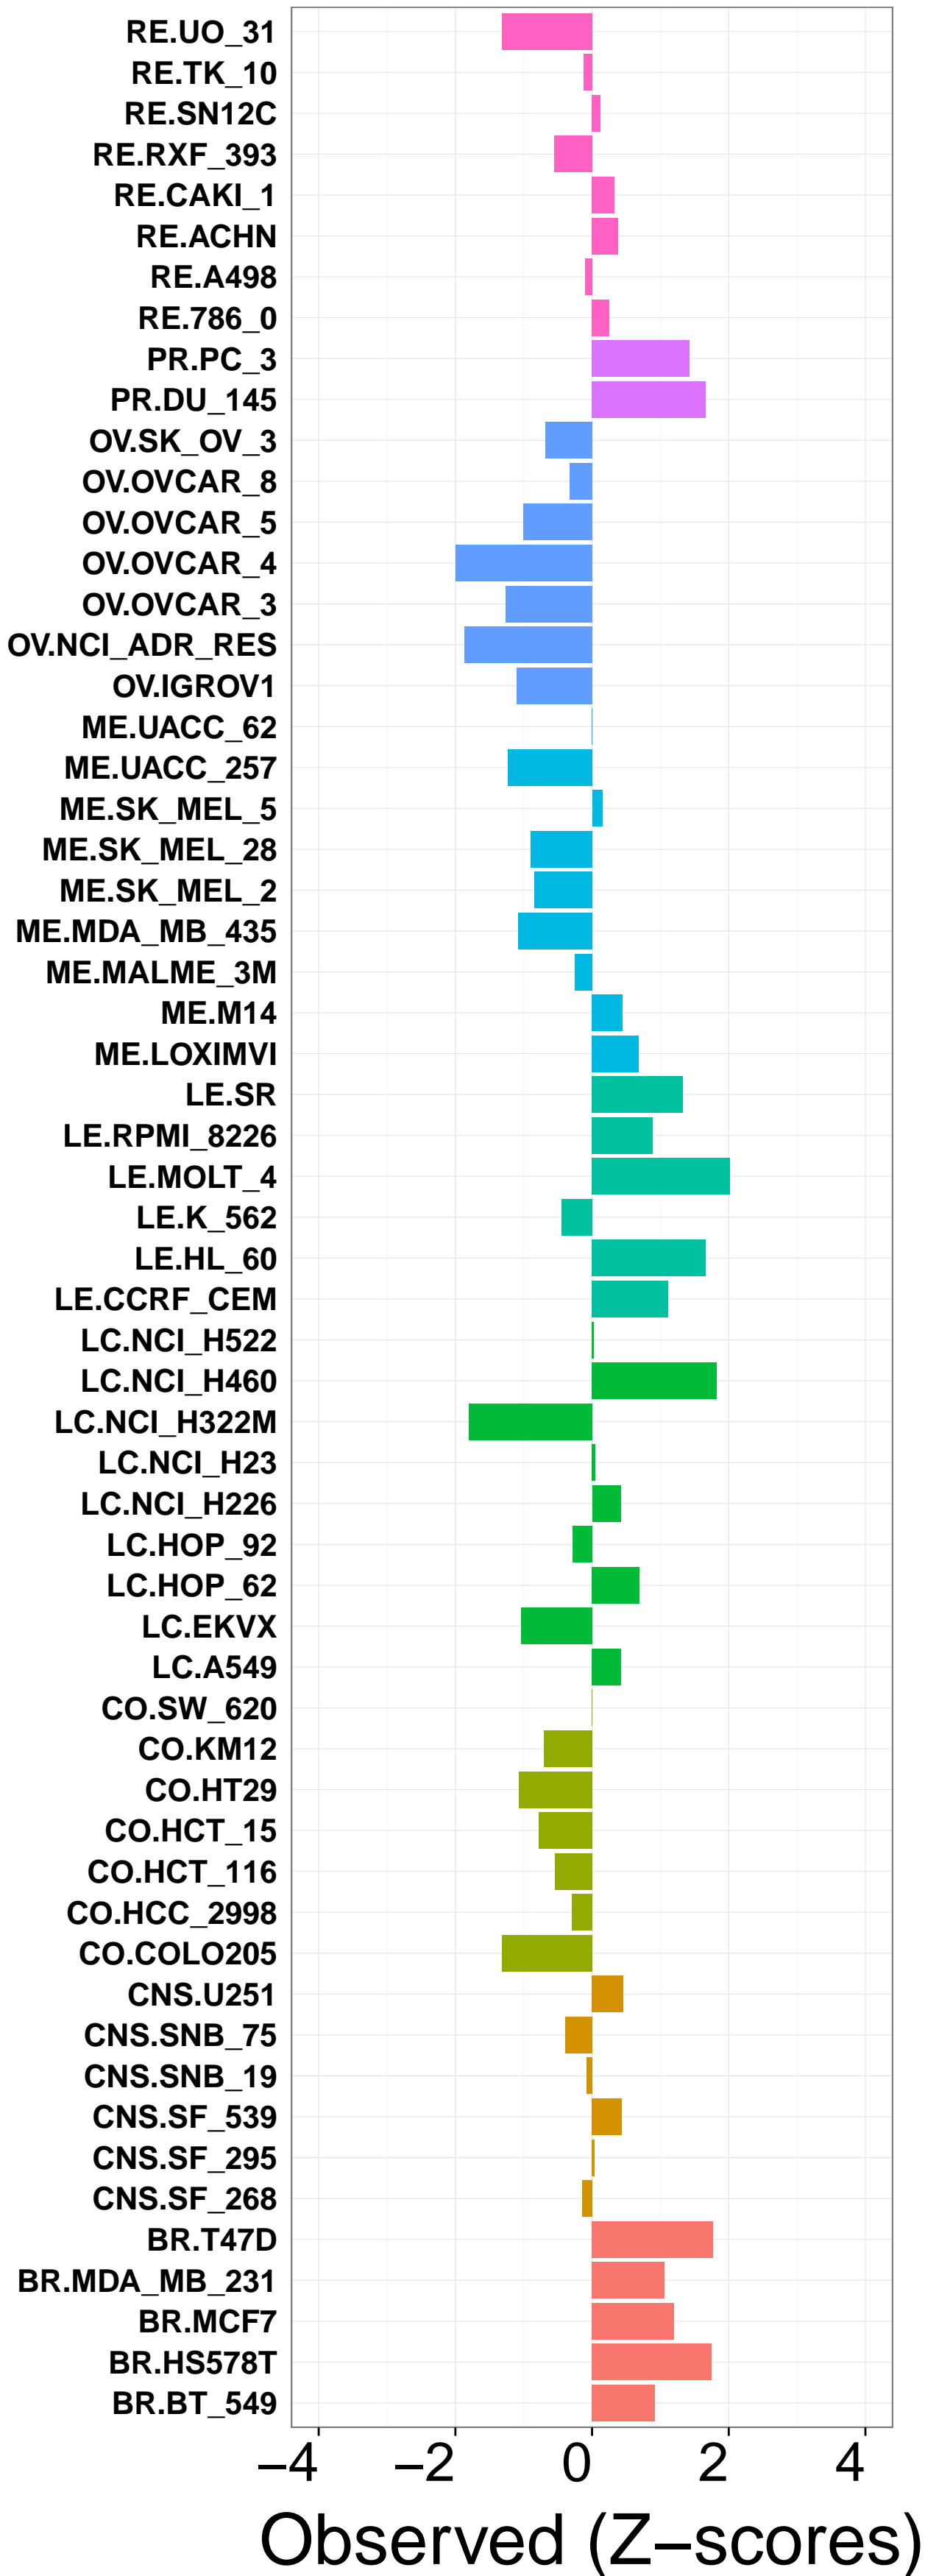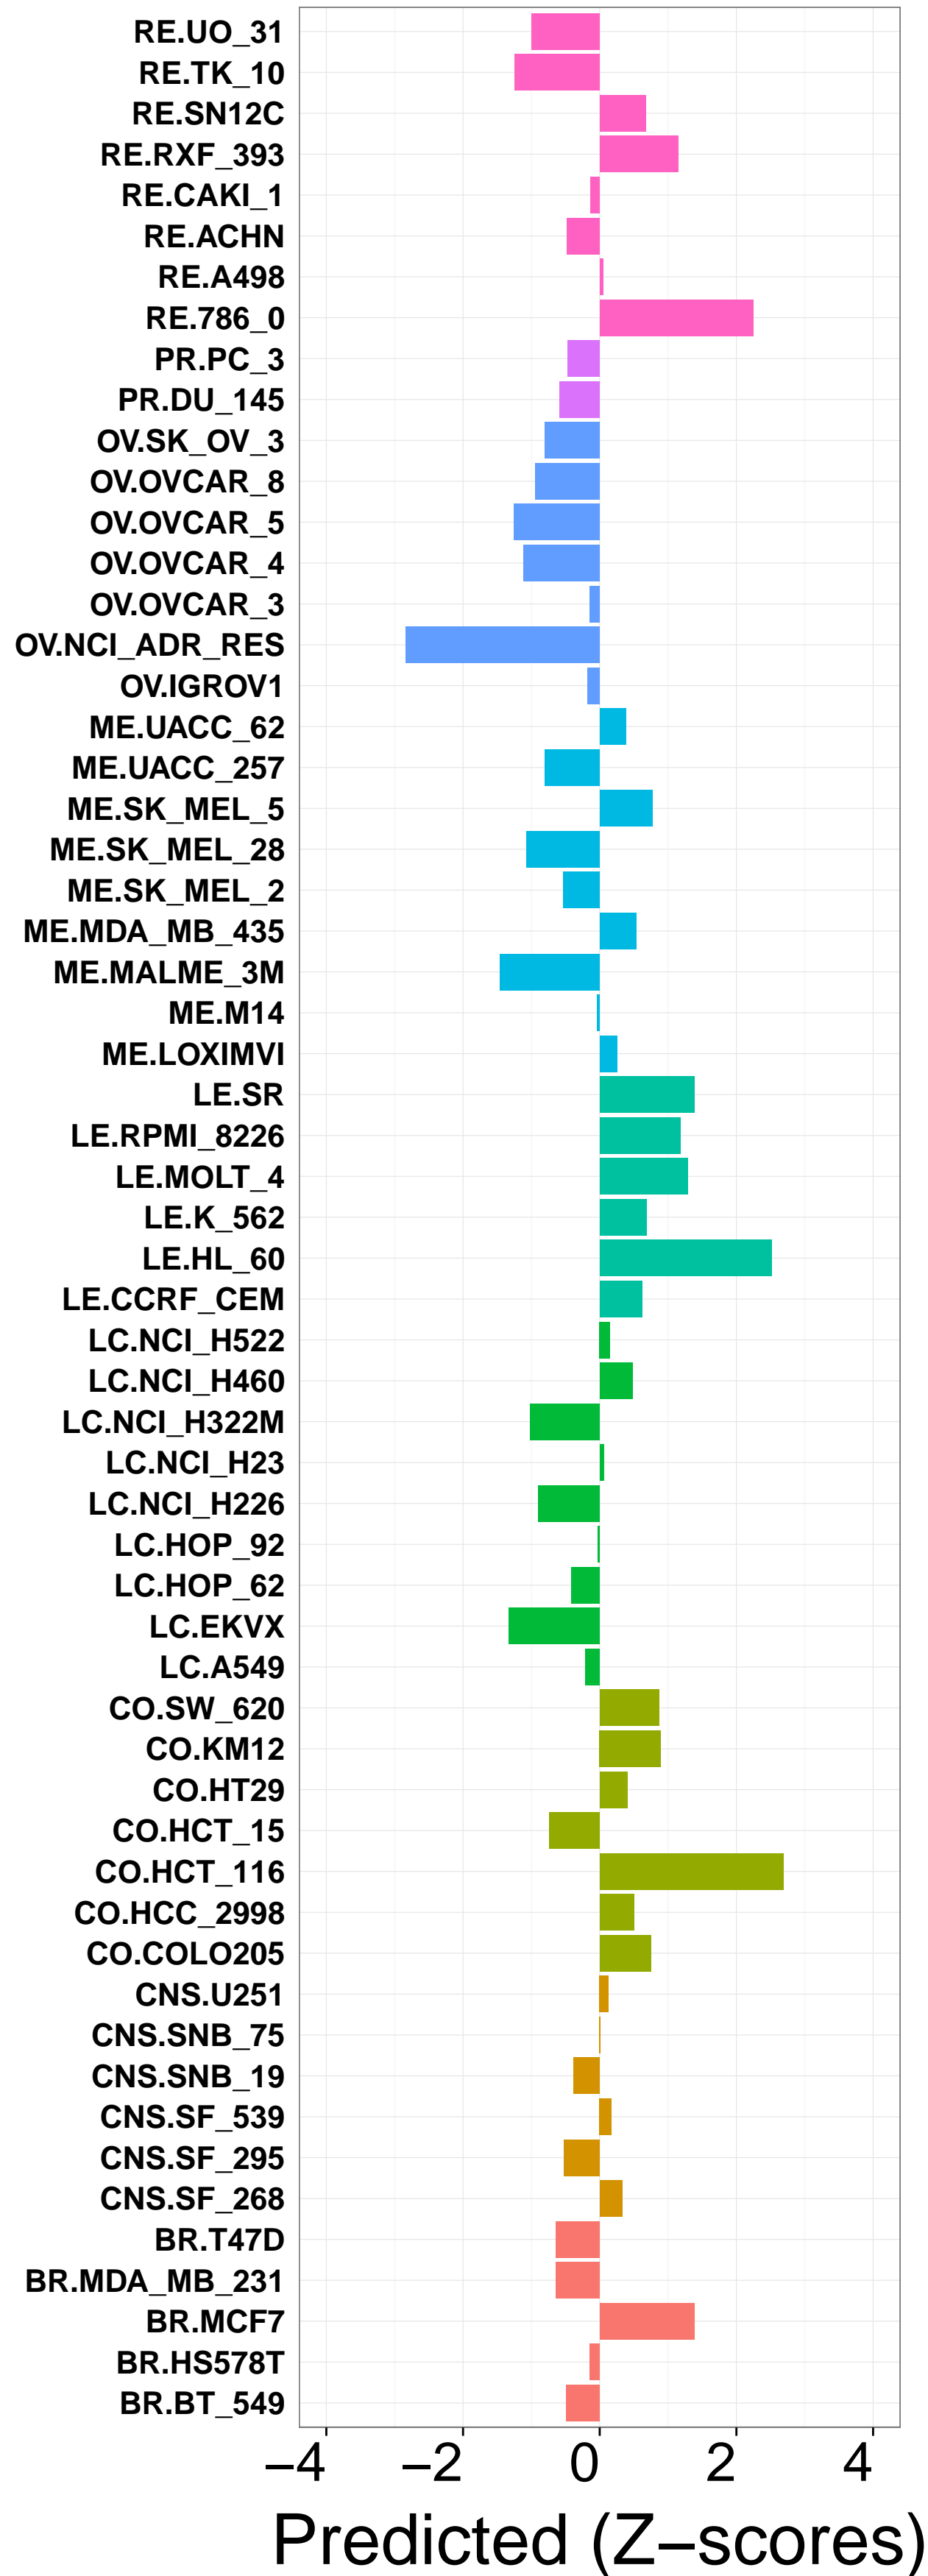



# NSC 141633, (LOCCO)

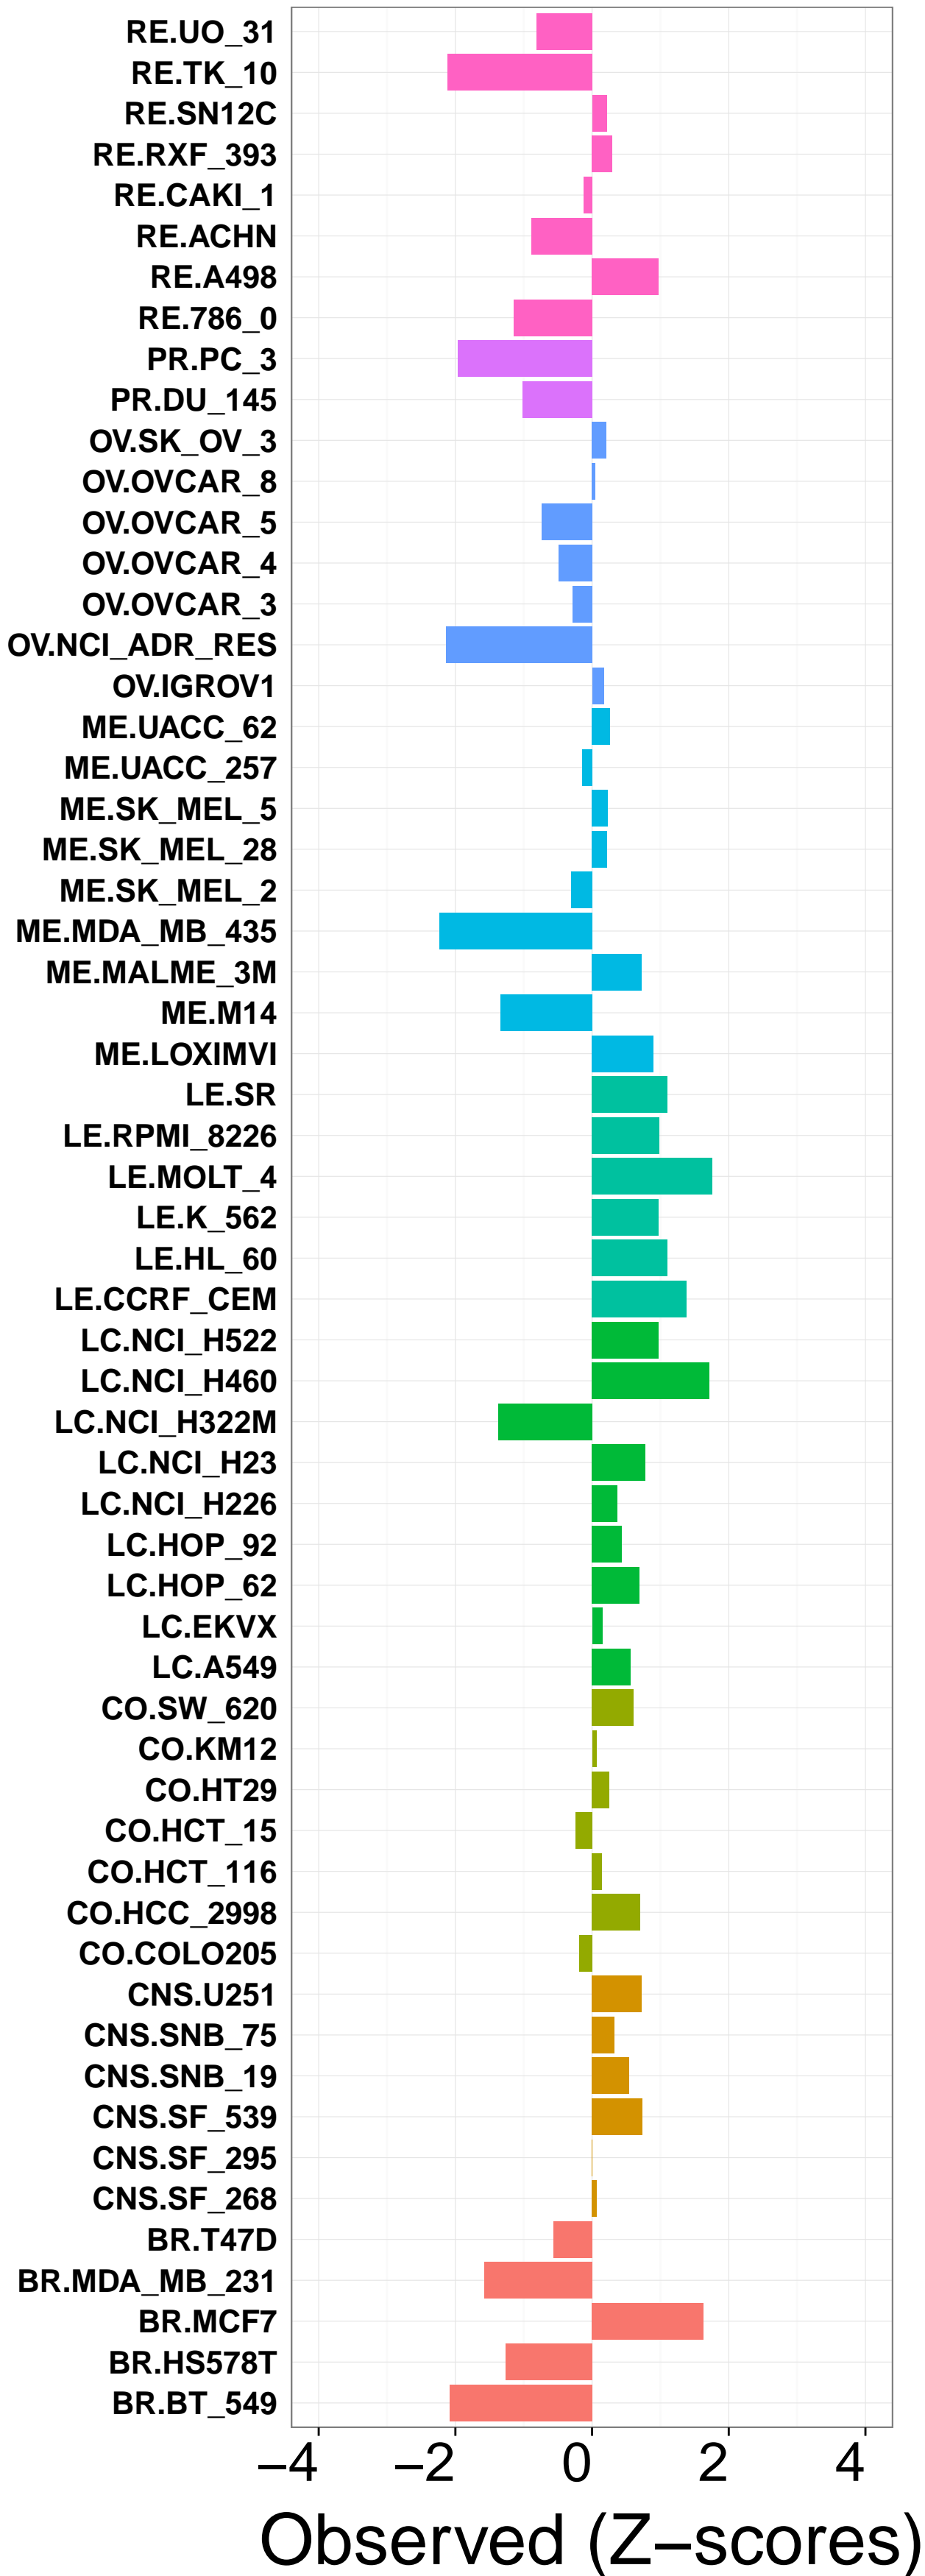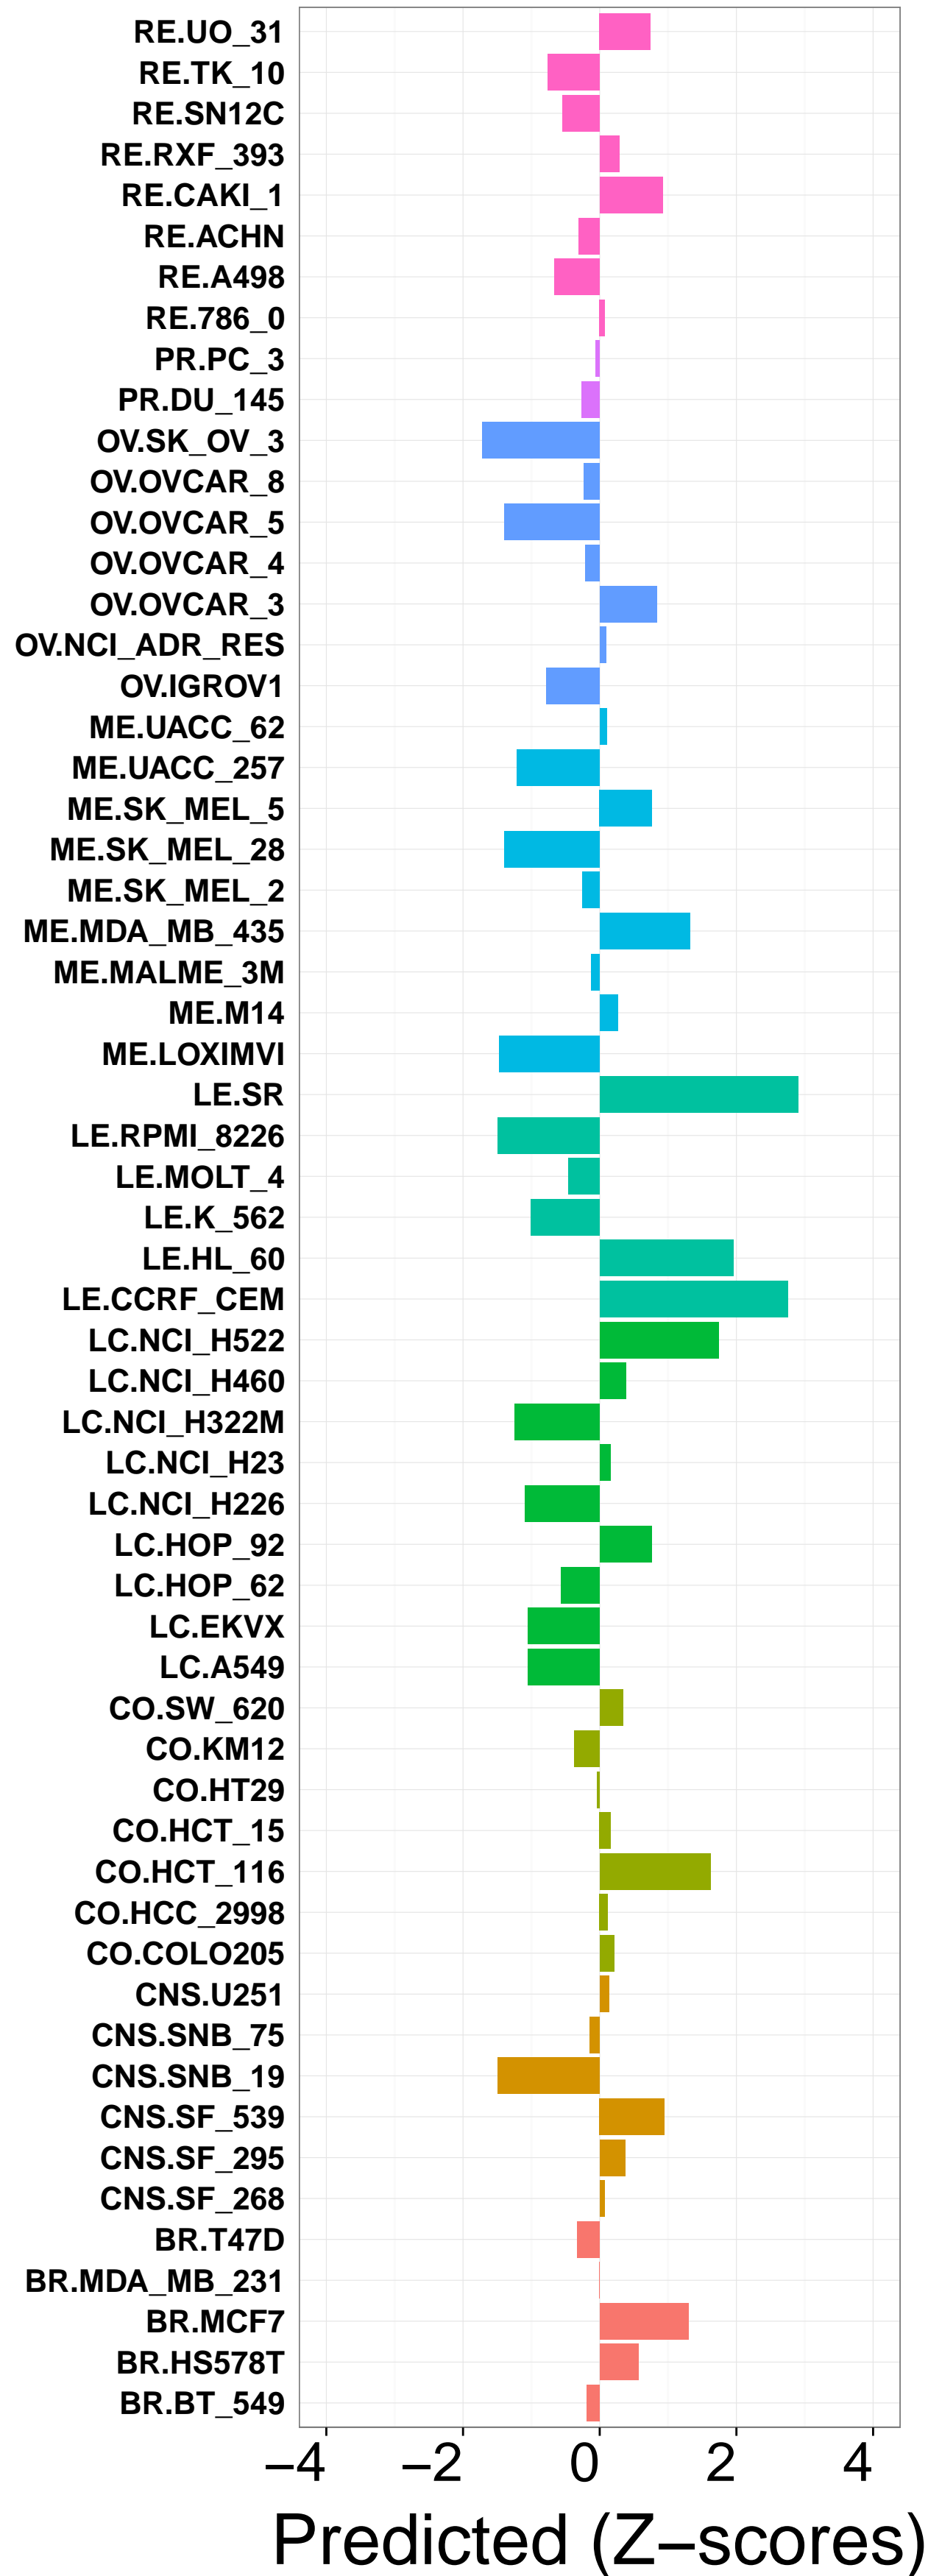

# NSC 174939, (LOCCO)

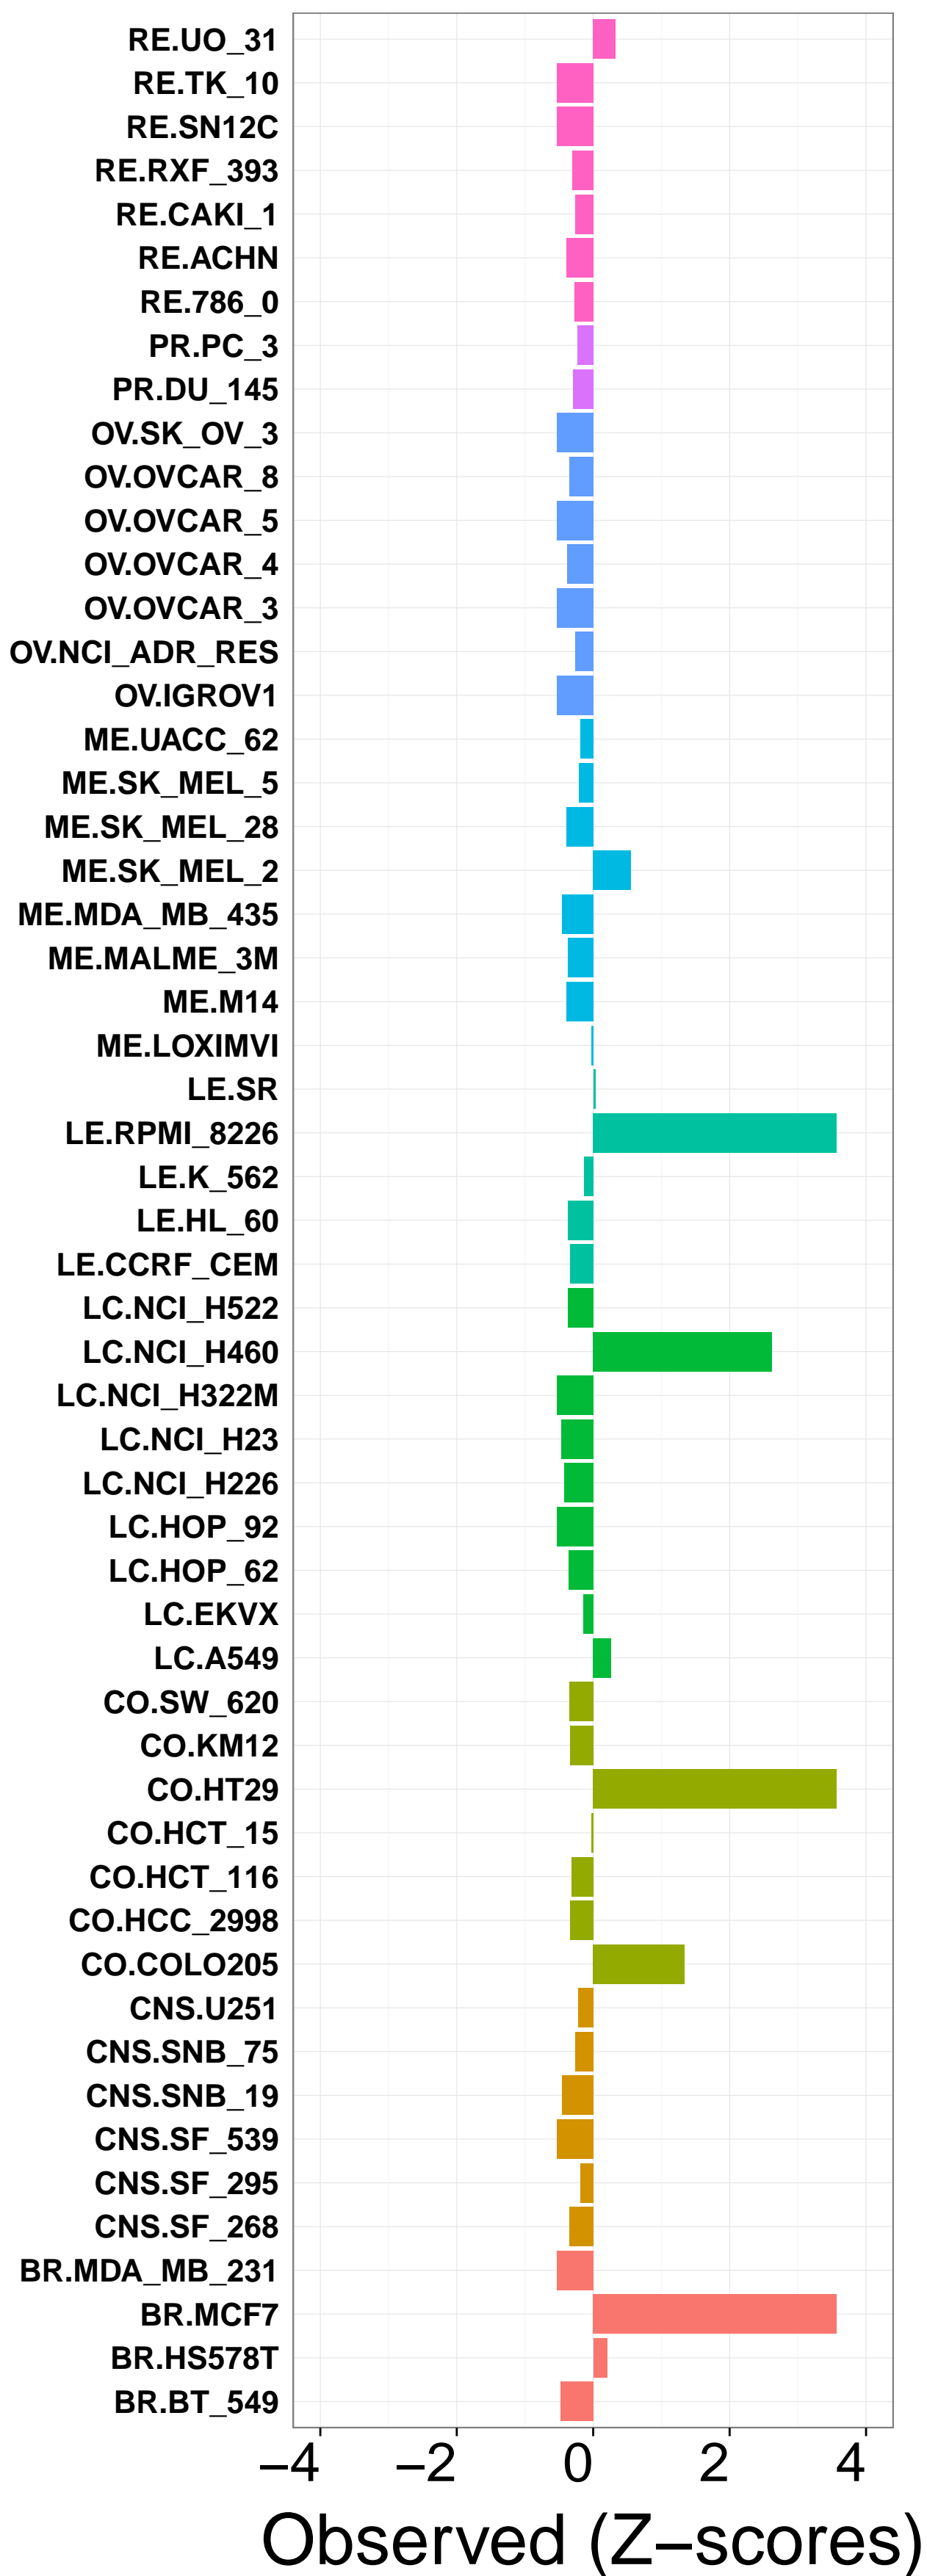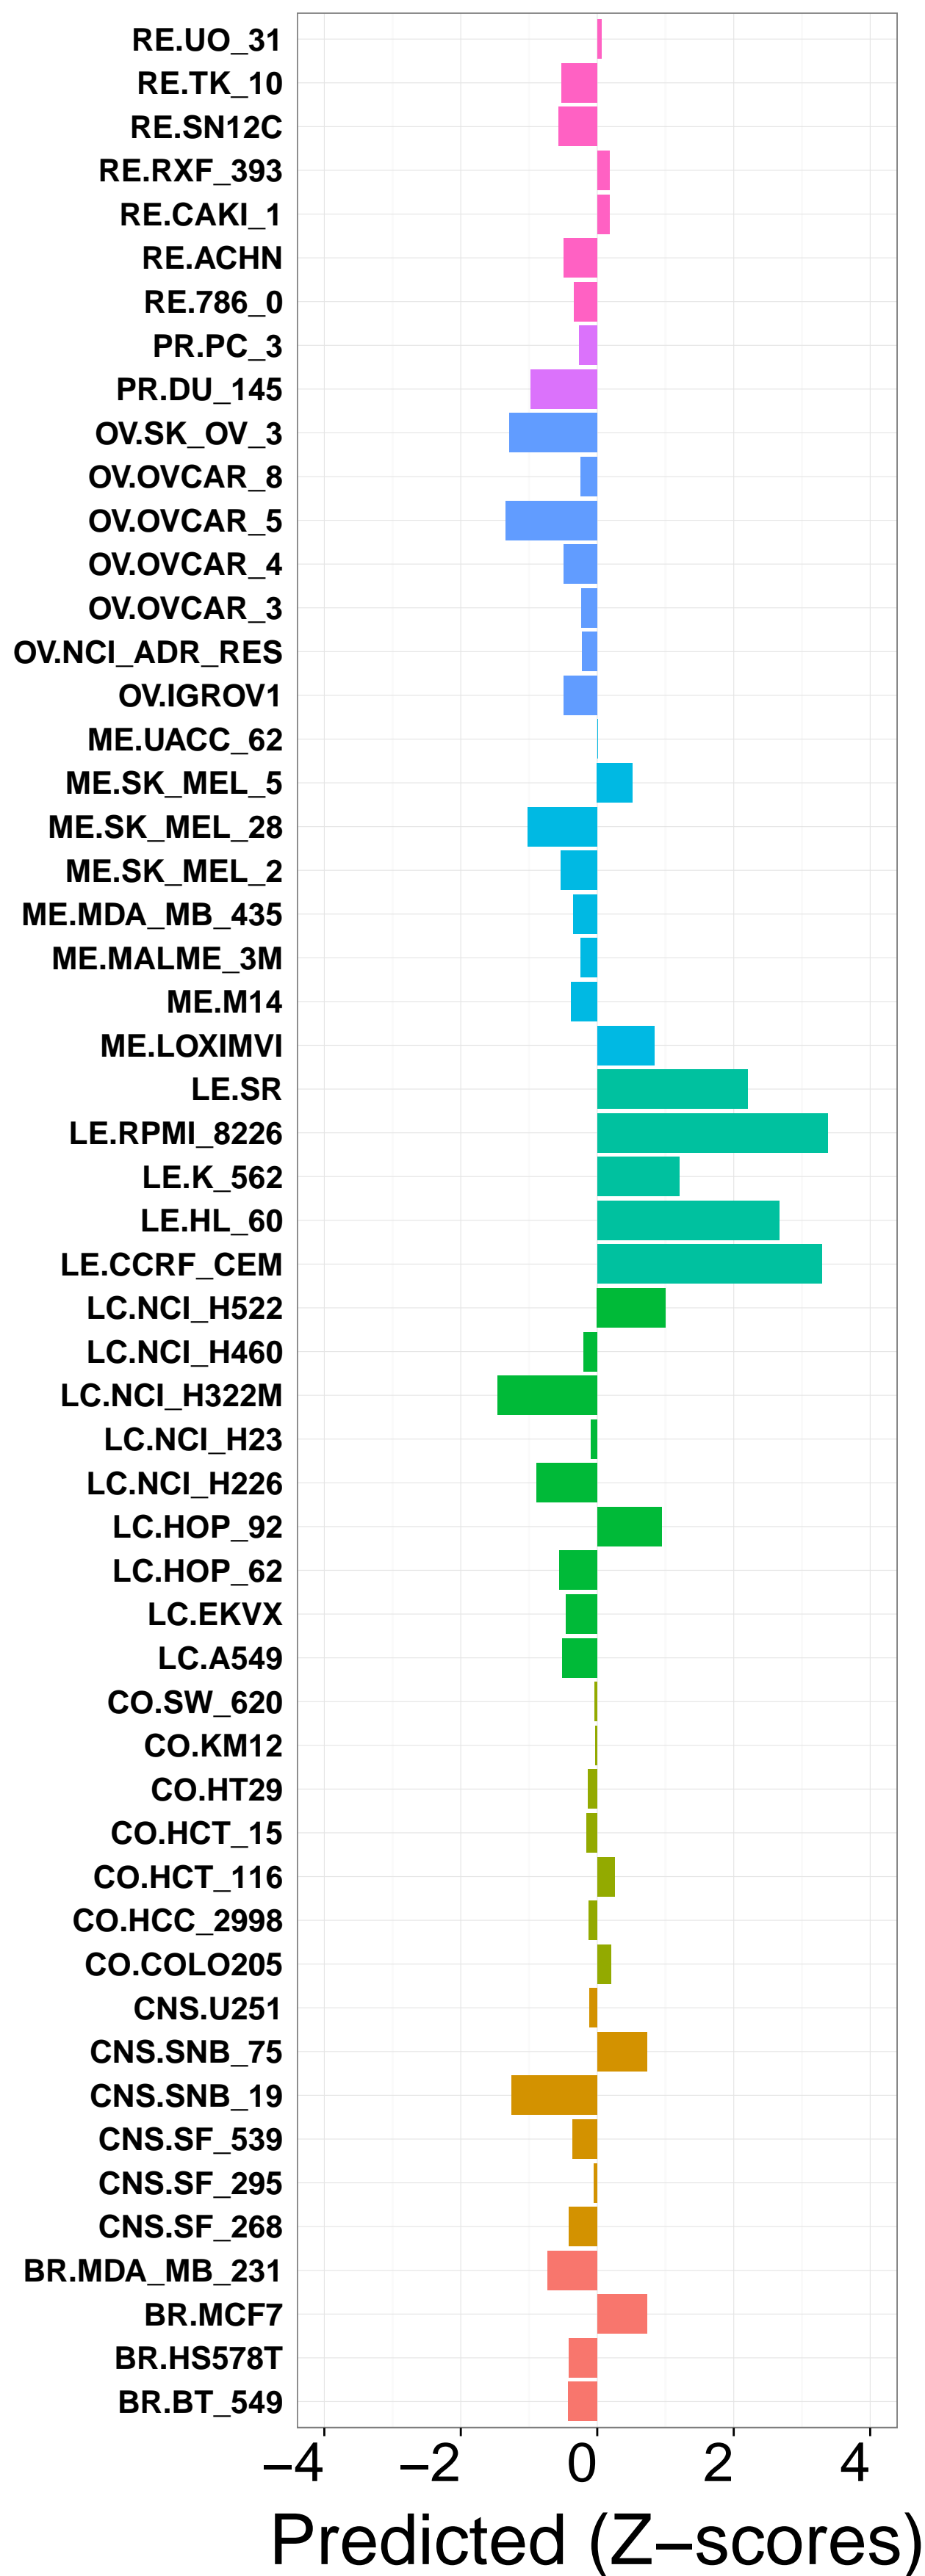

# NSC 19893, Fluorouracil (LOCCO)

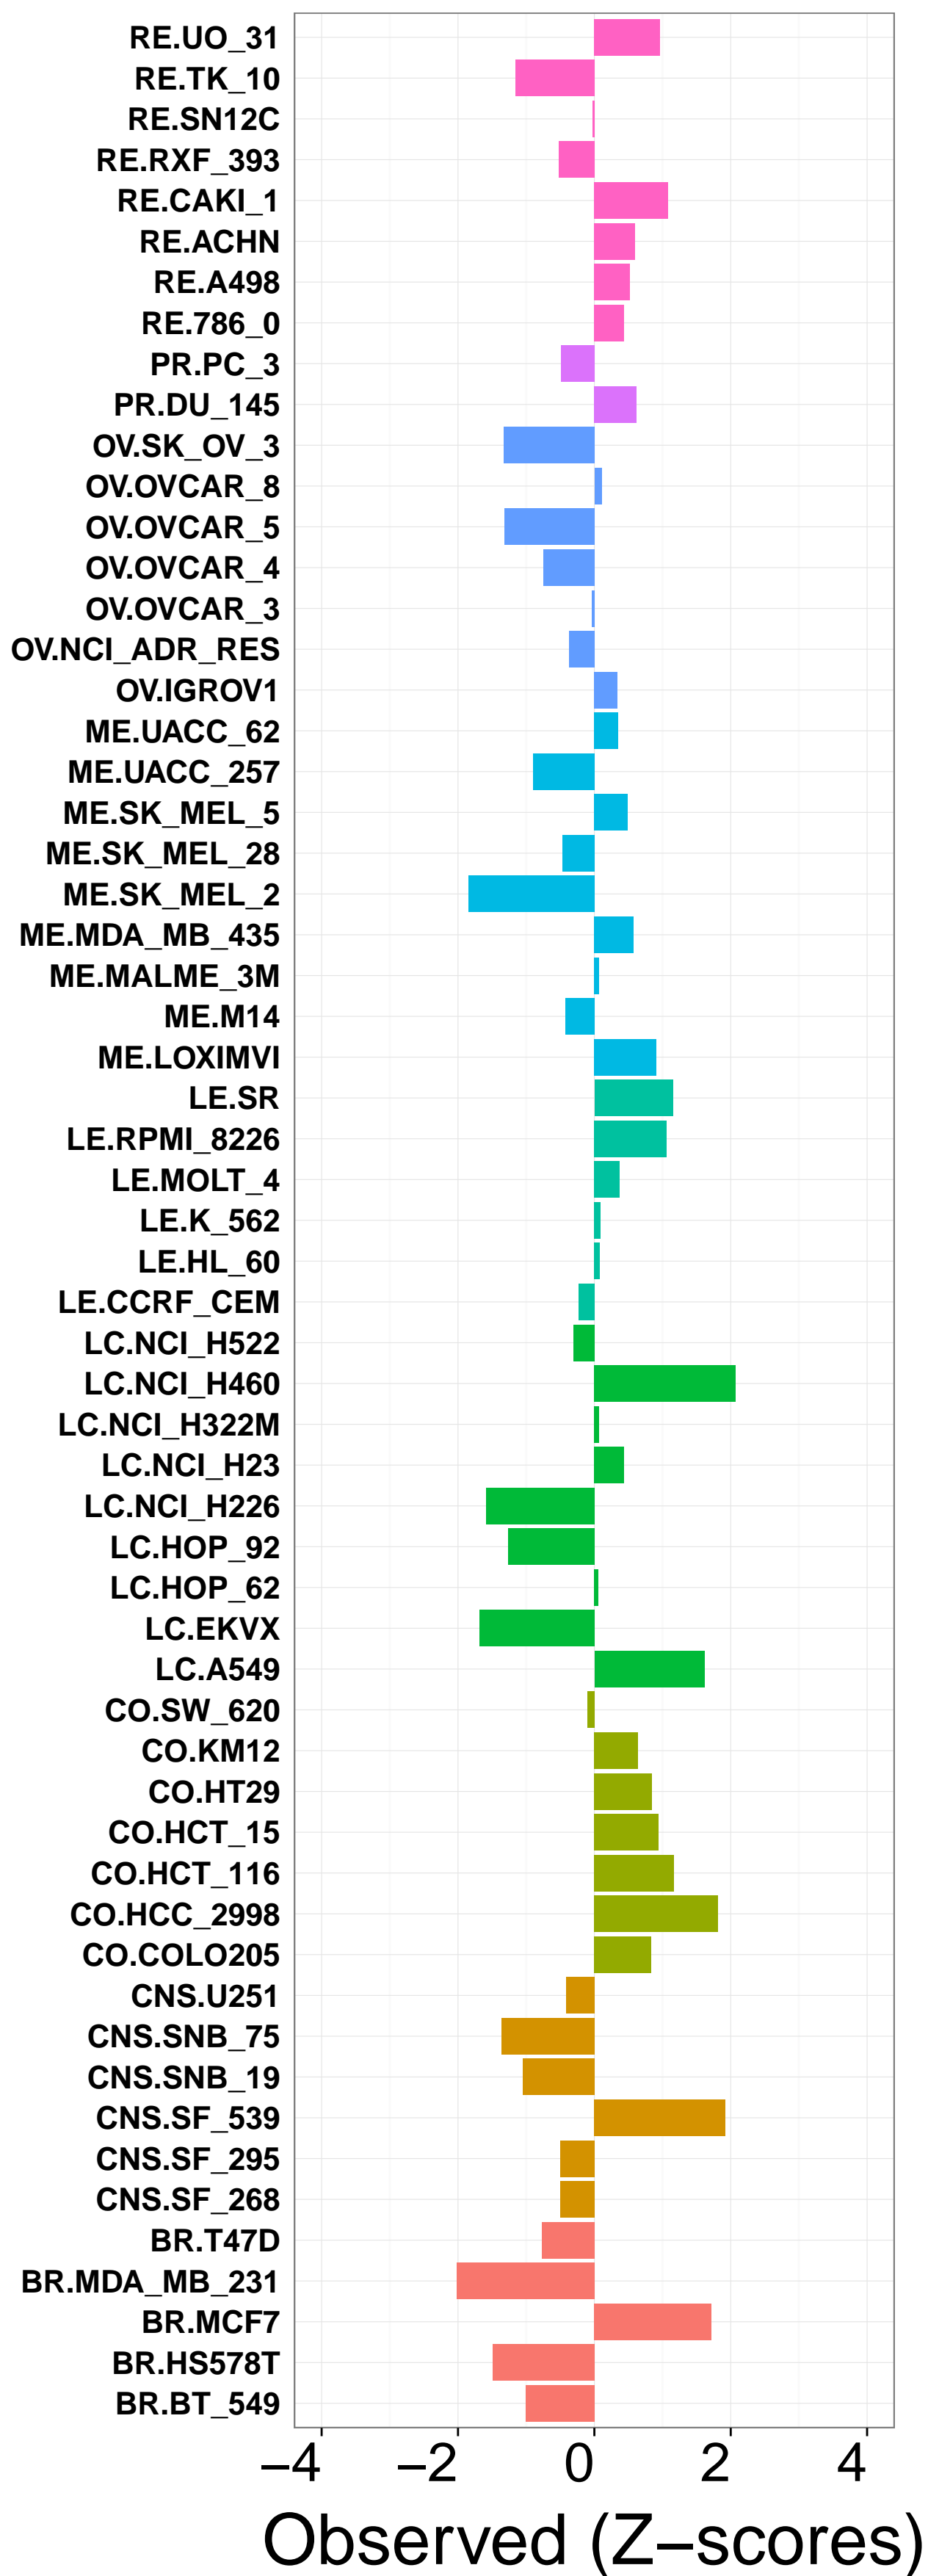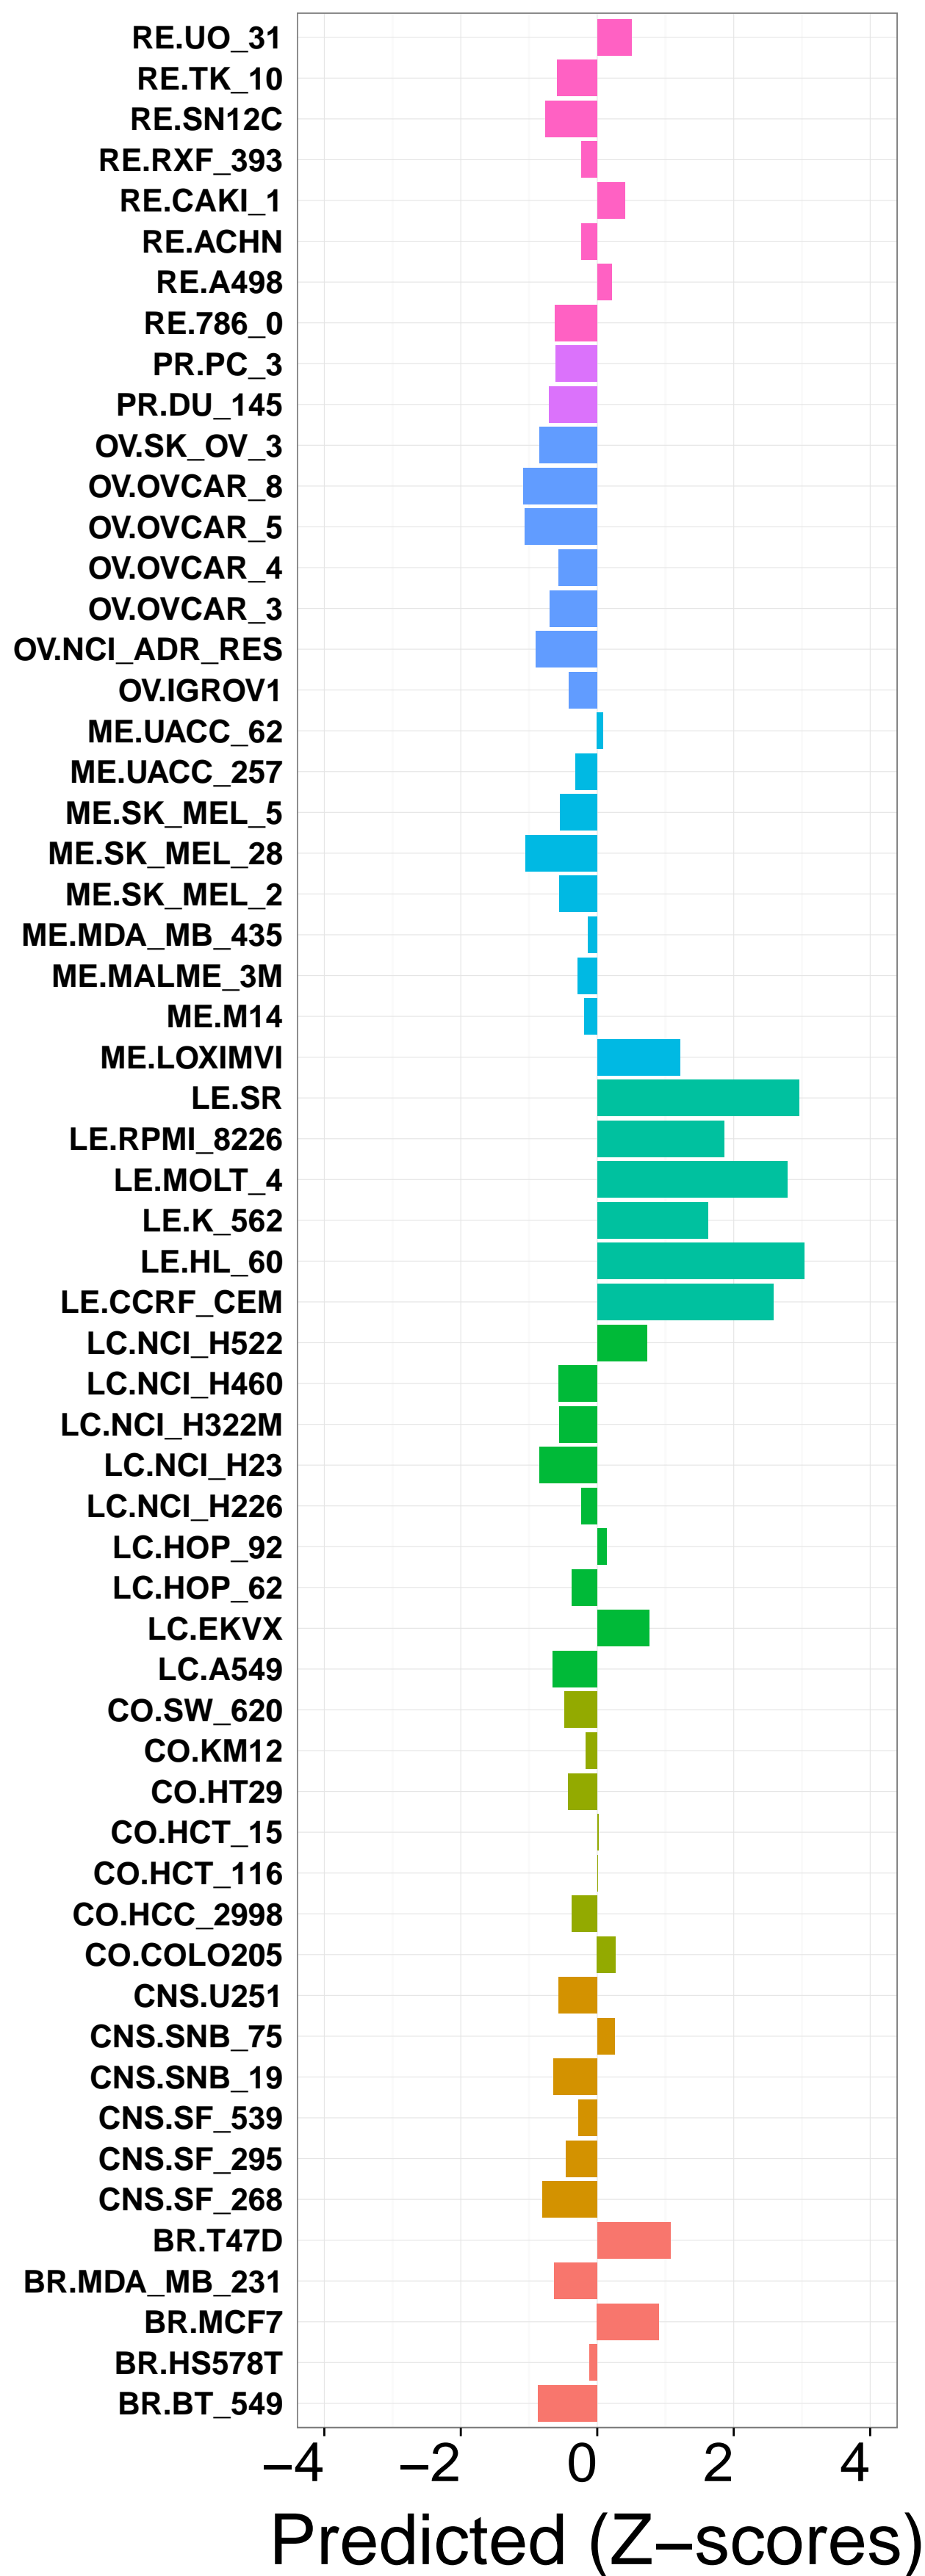

# NSC 221019, (LOCCO)

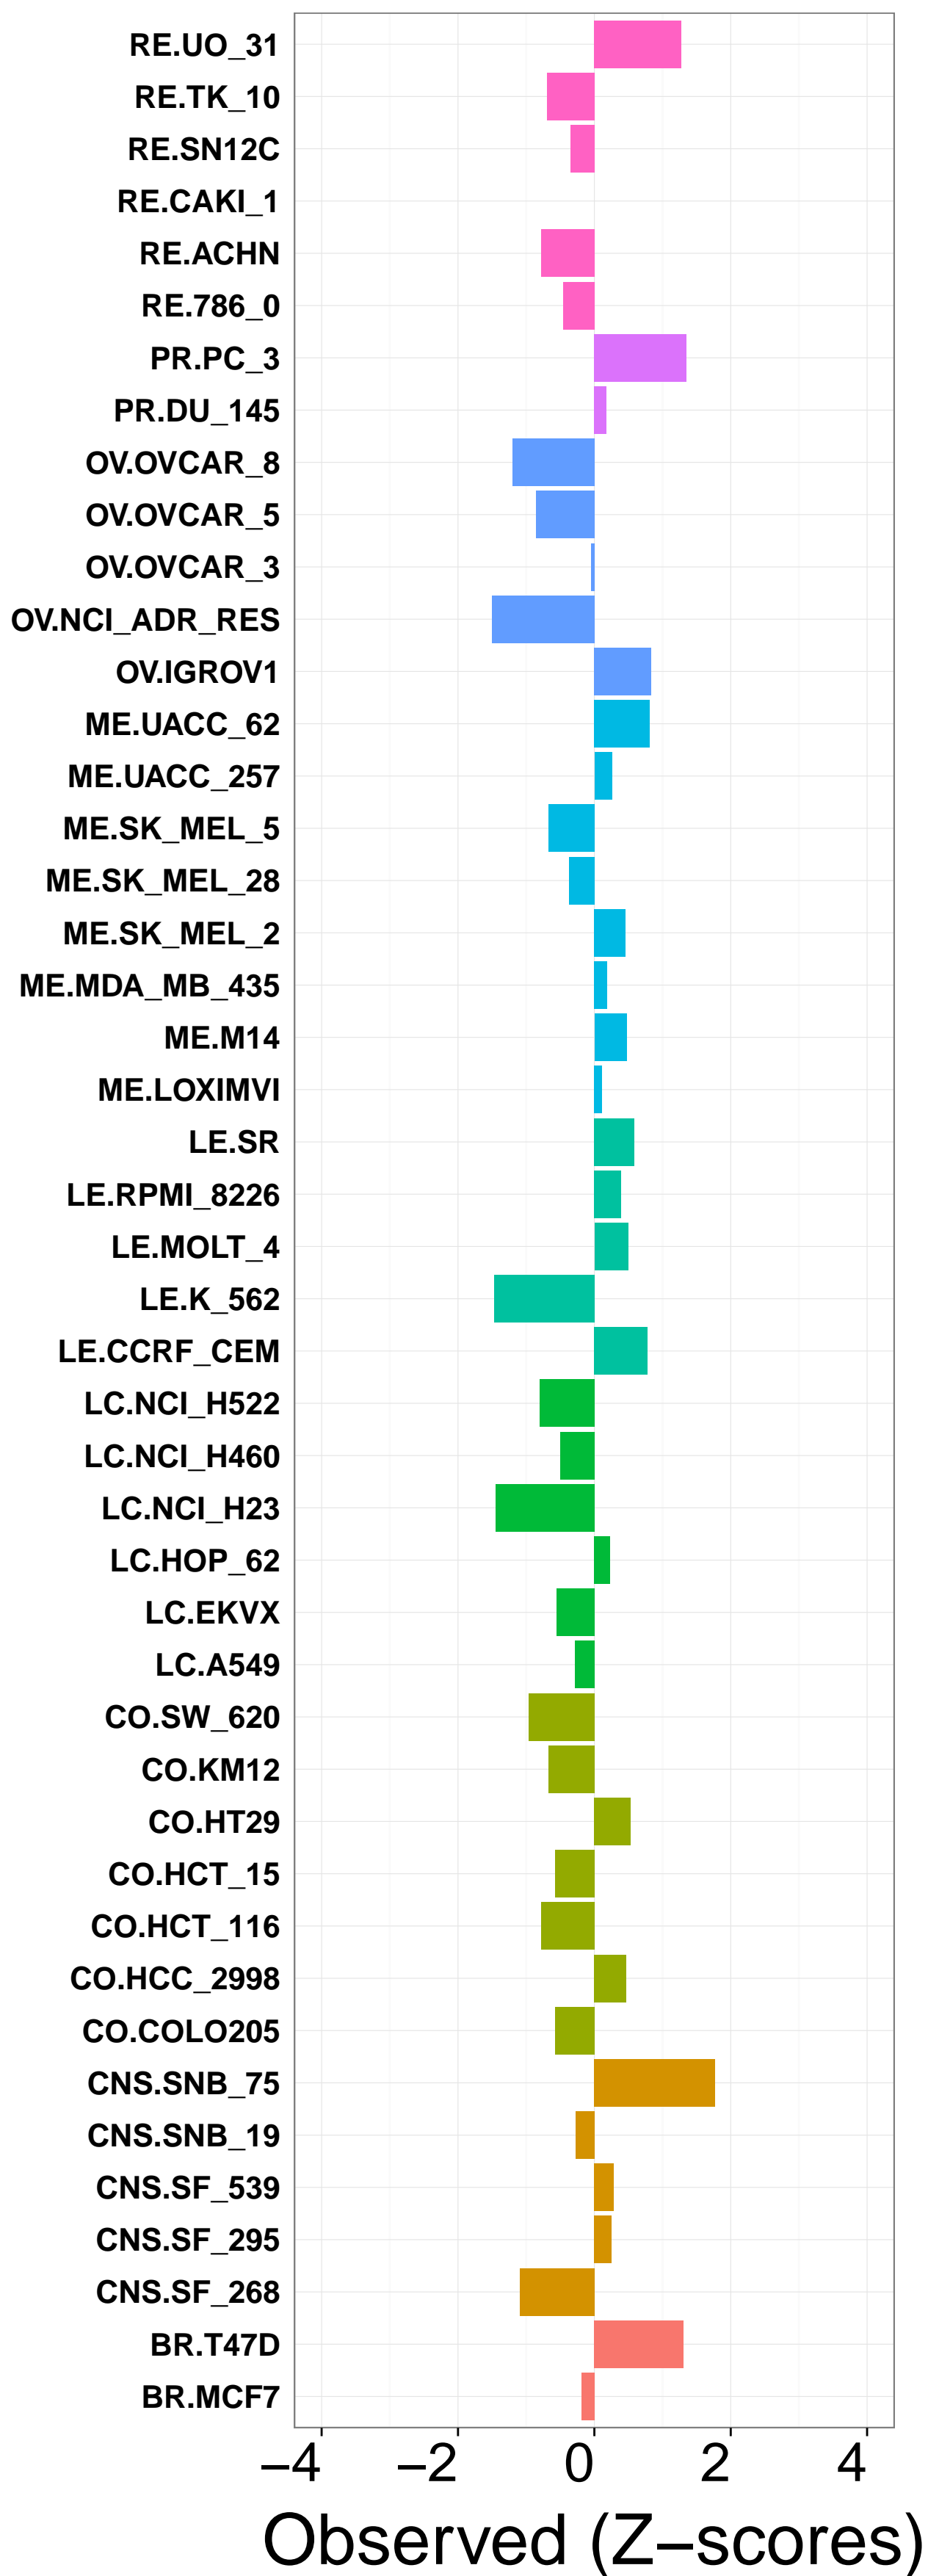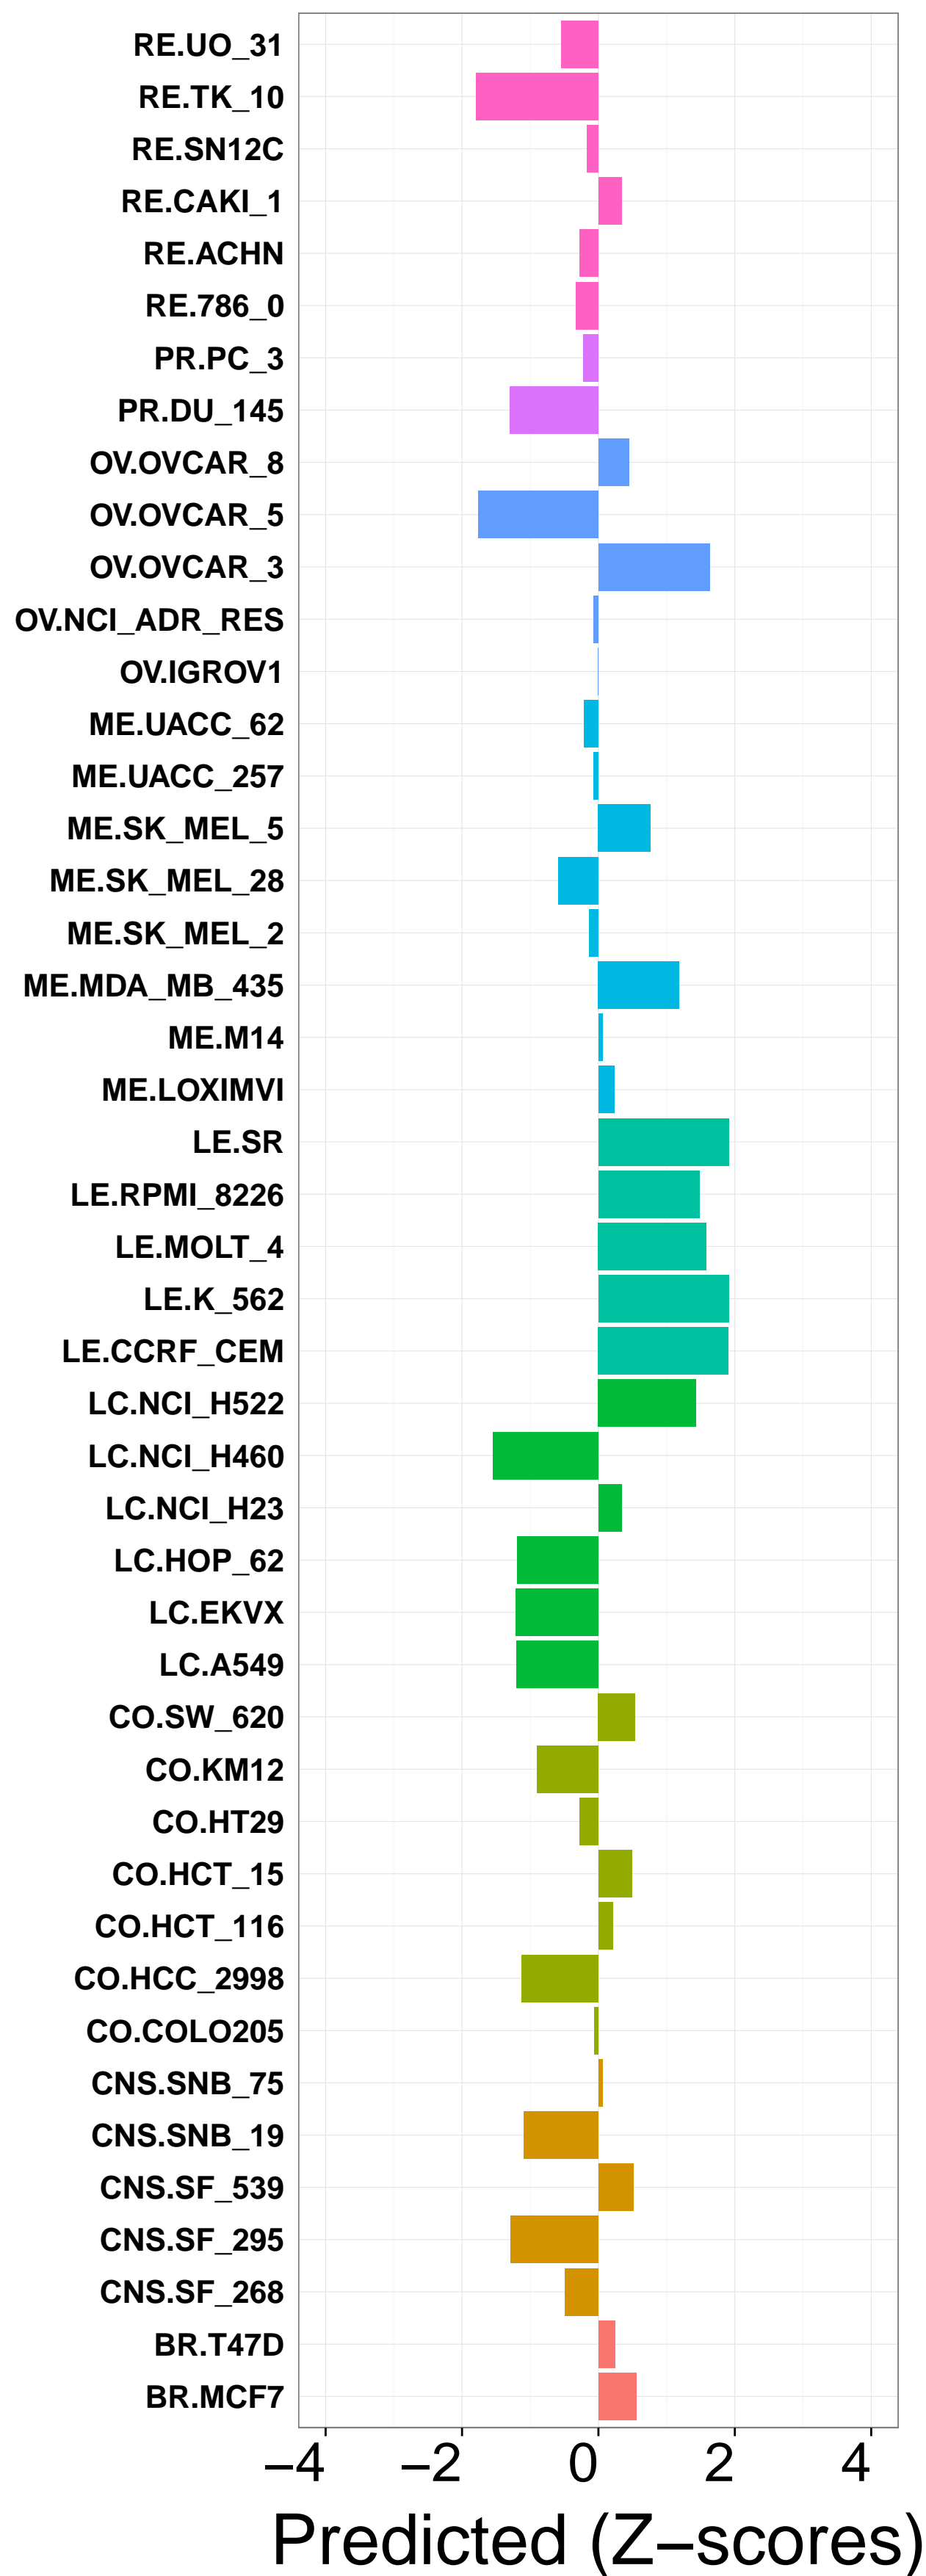

# NSC 246131, (LOCCO)

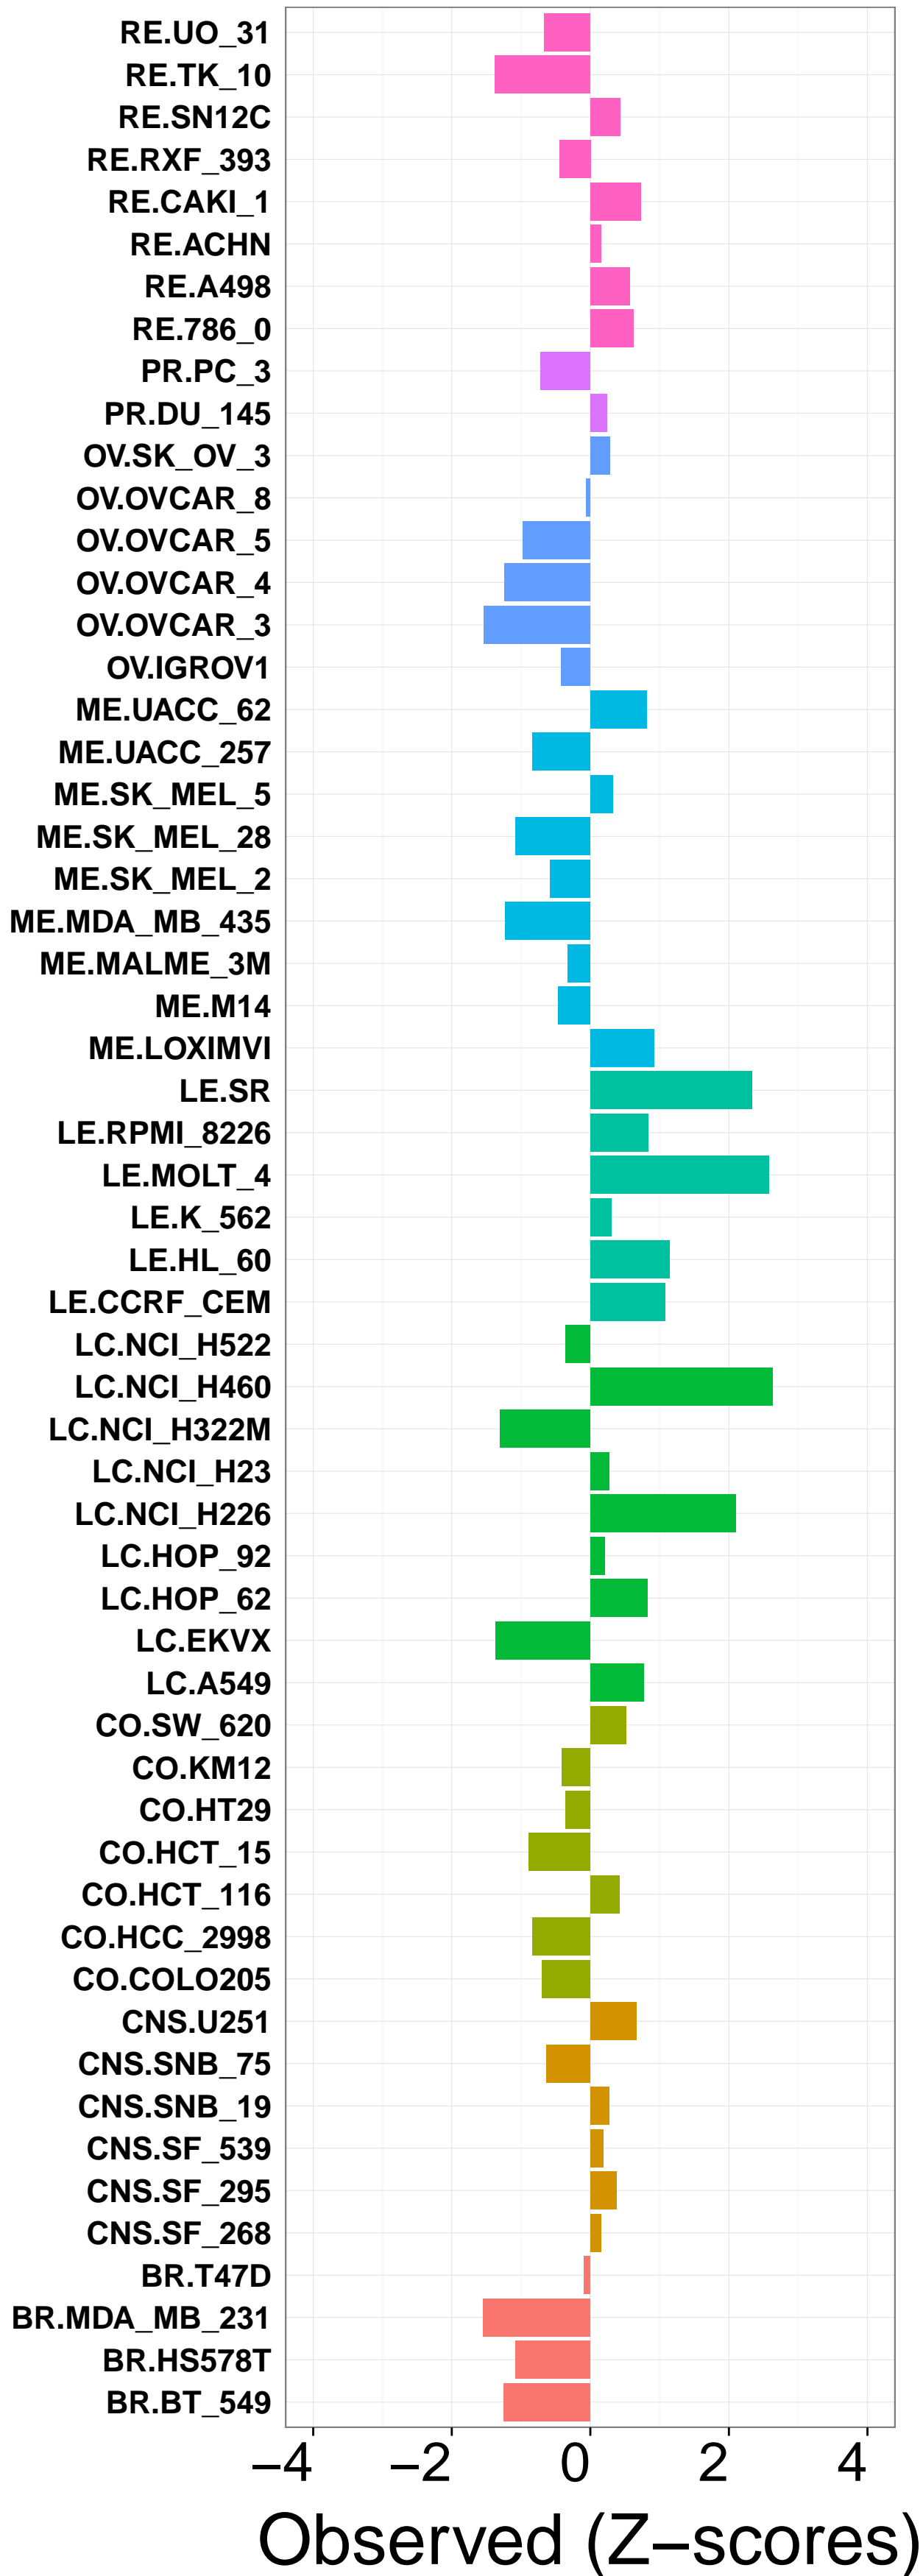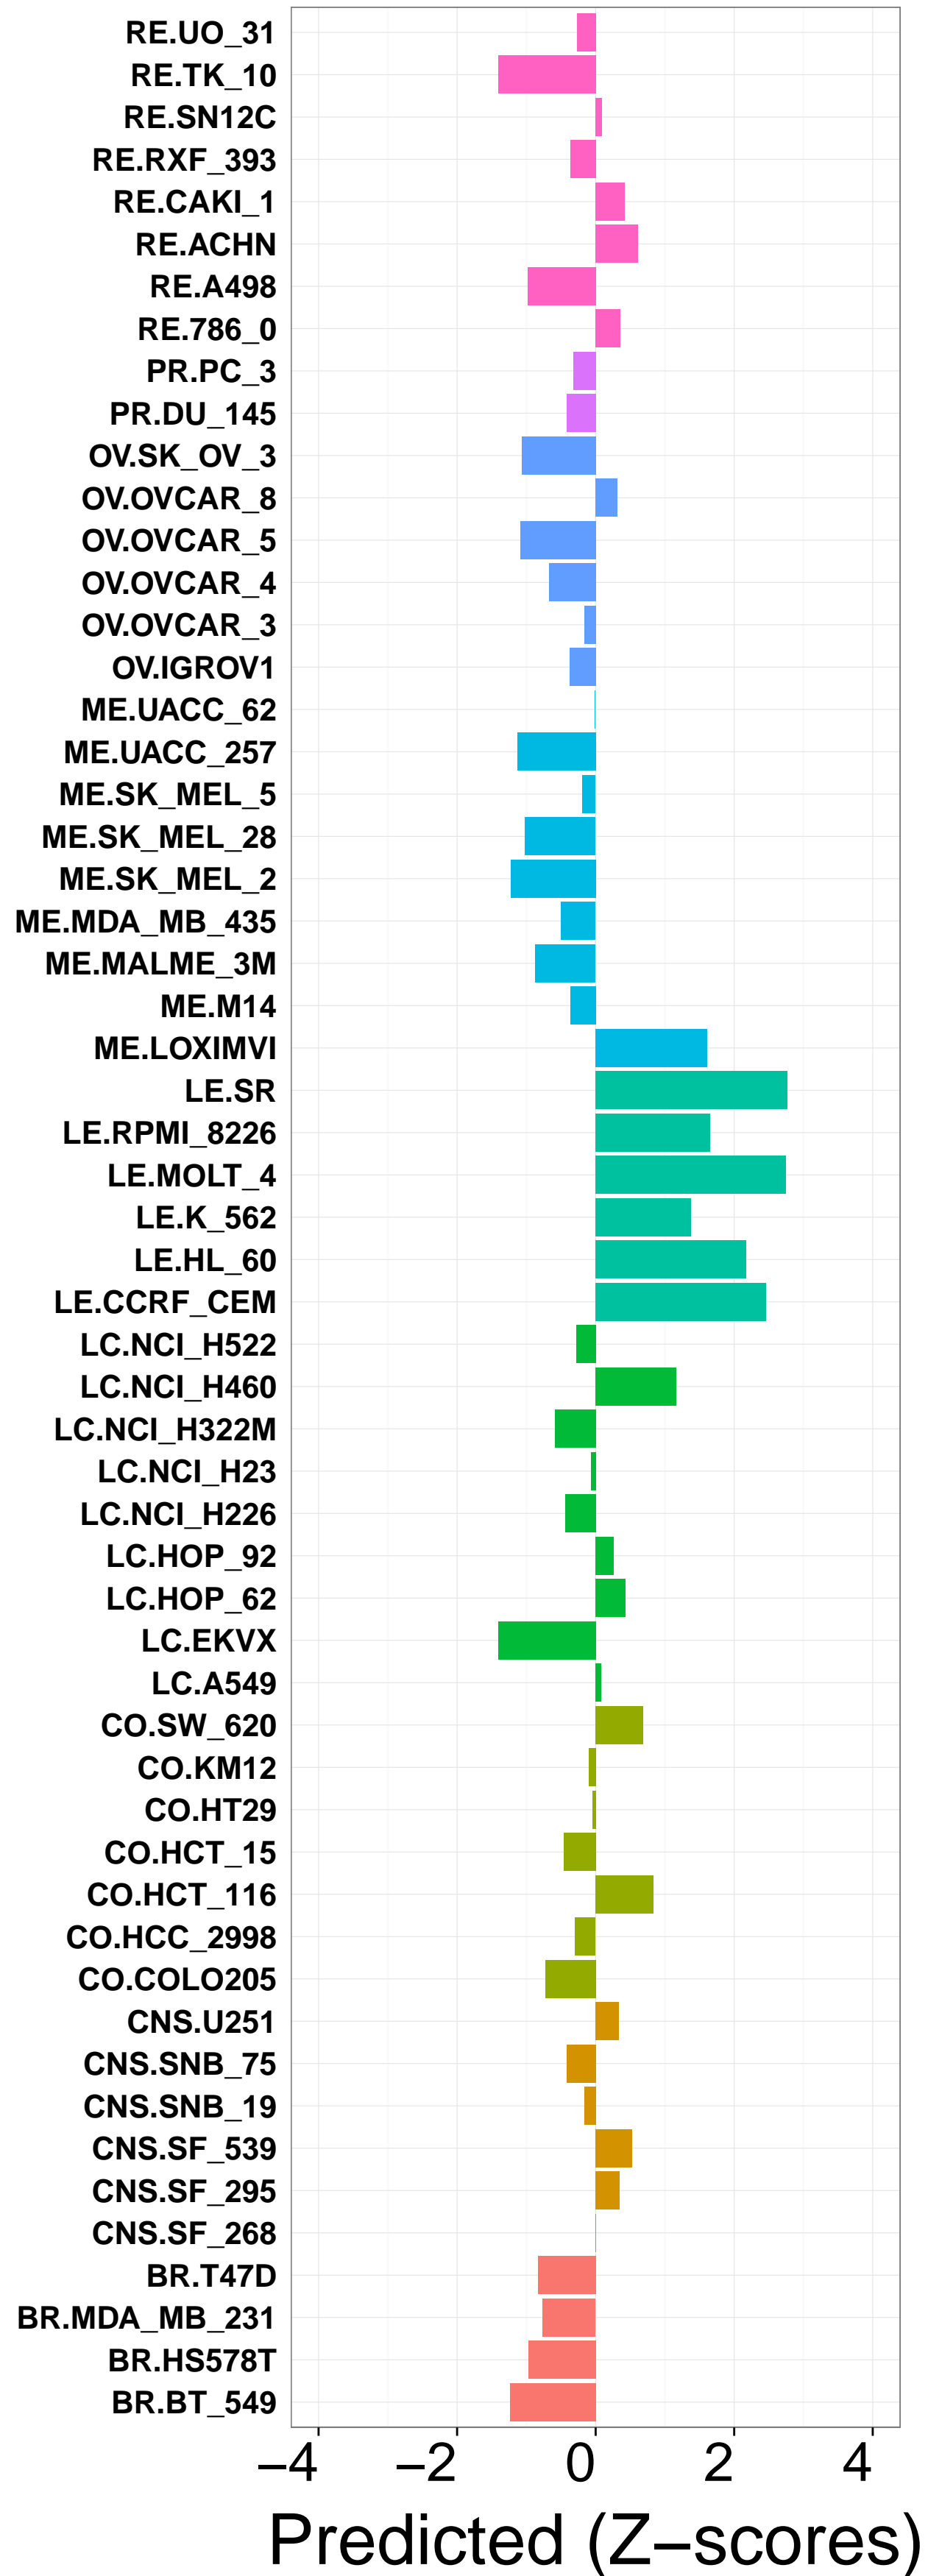



# NSC 255109, (LOCCO)

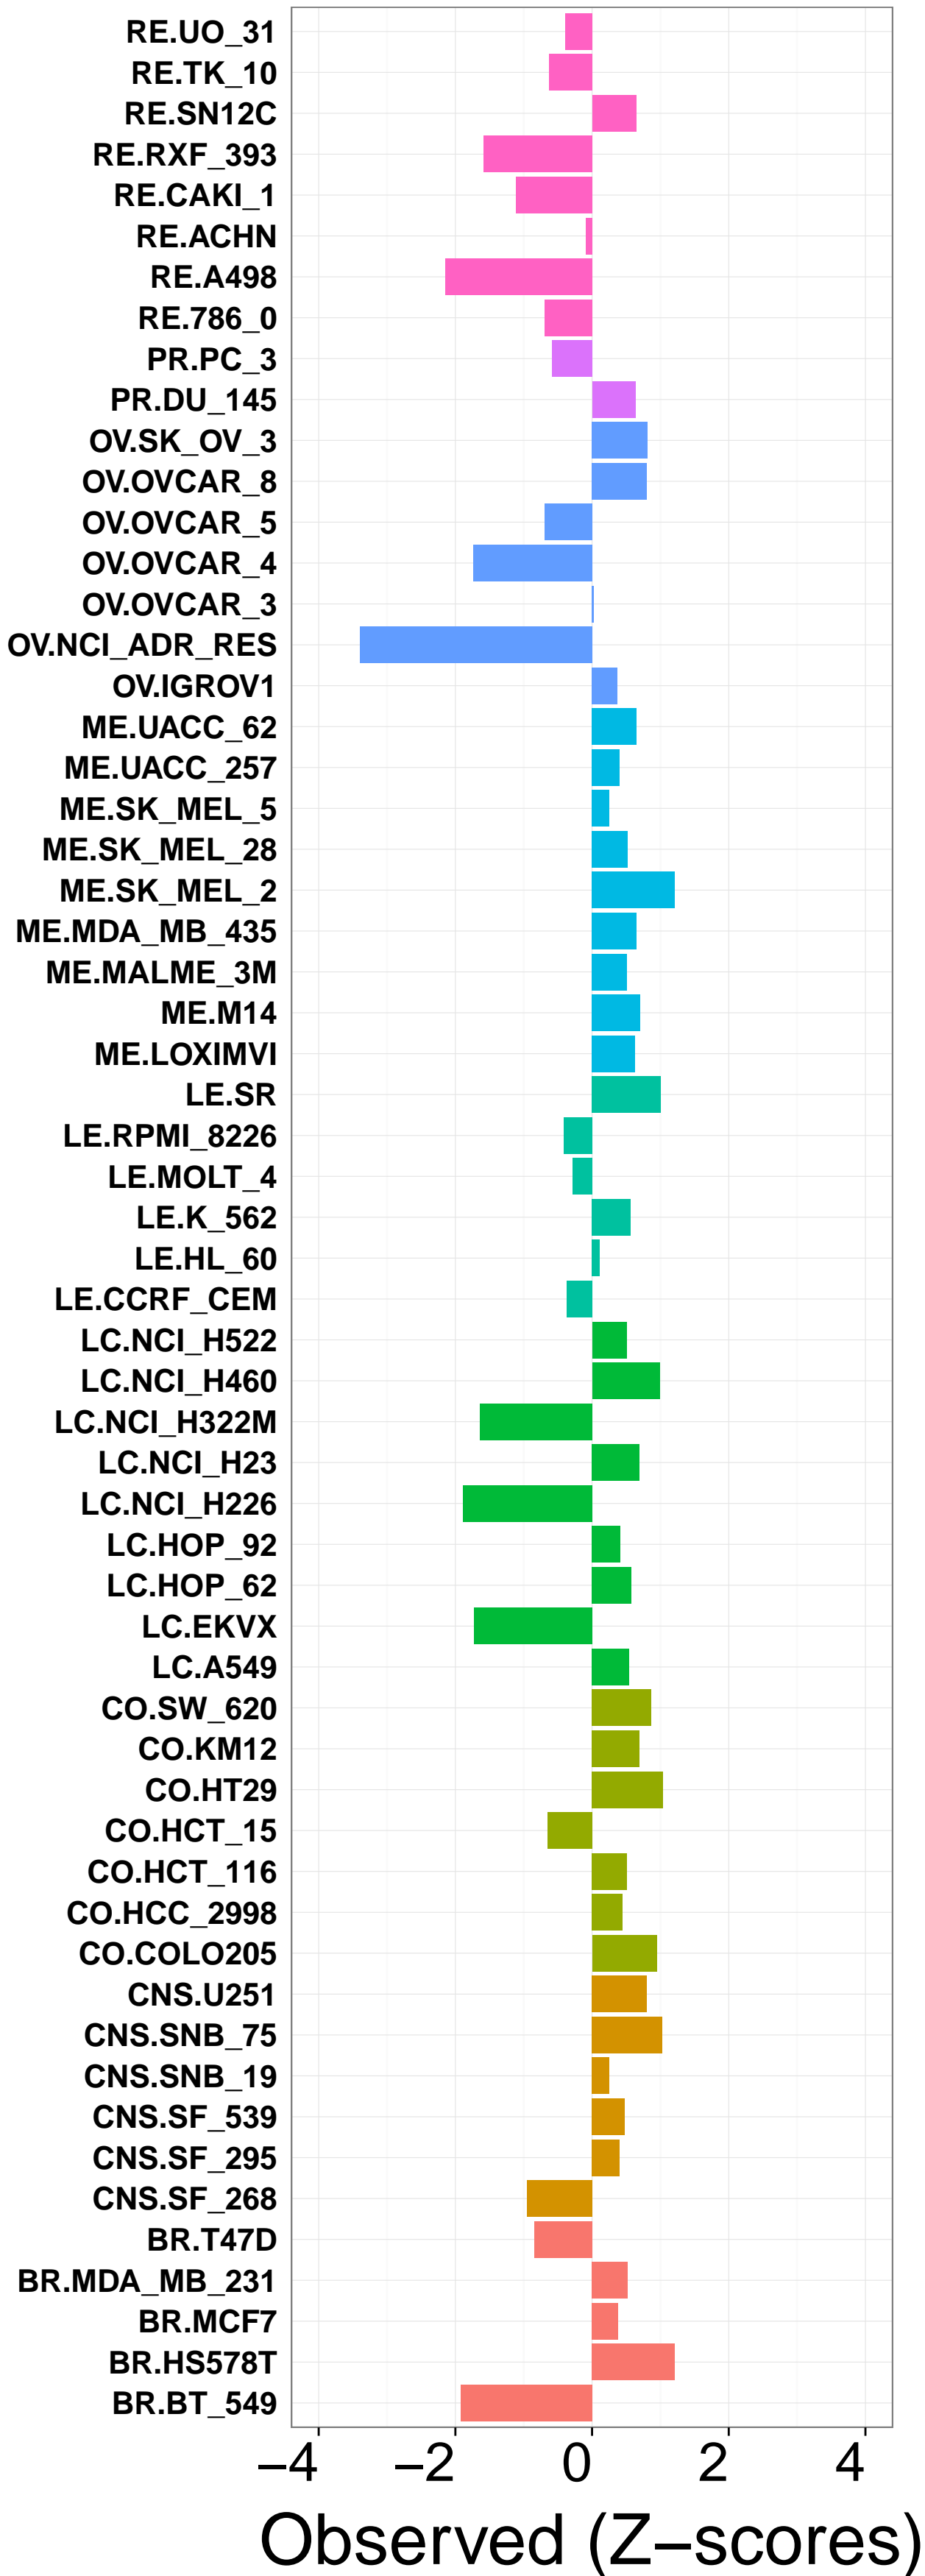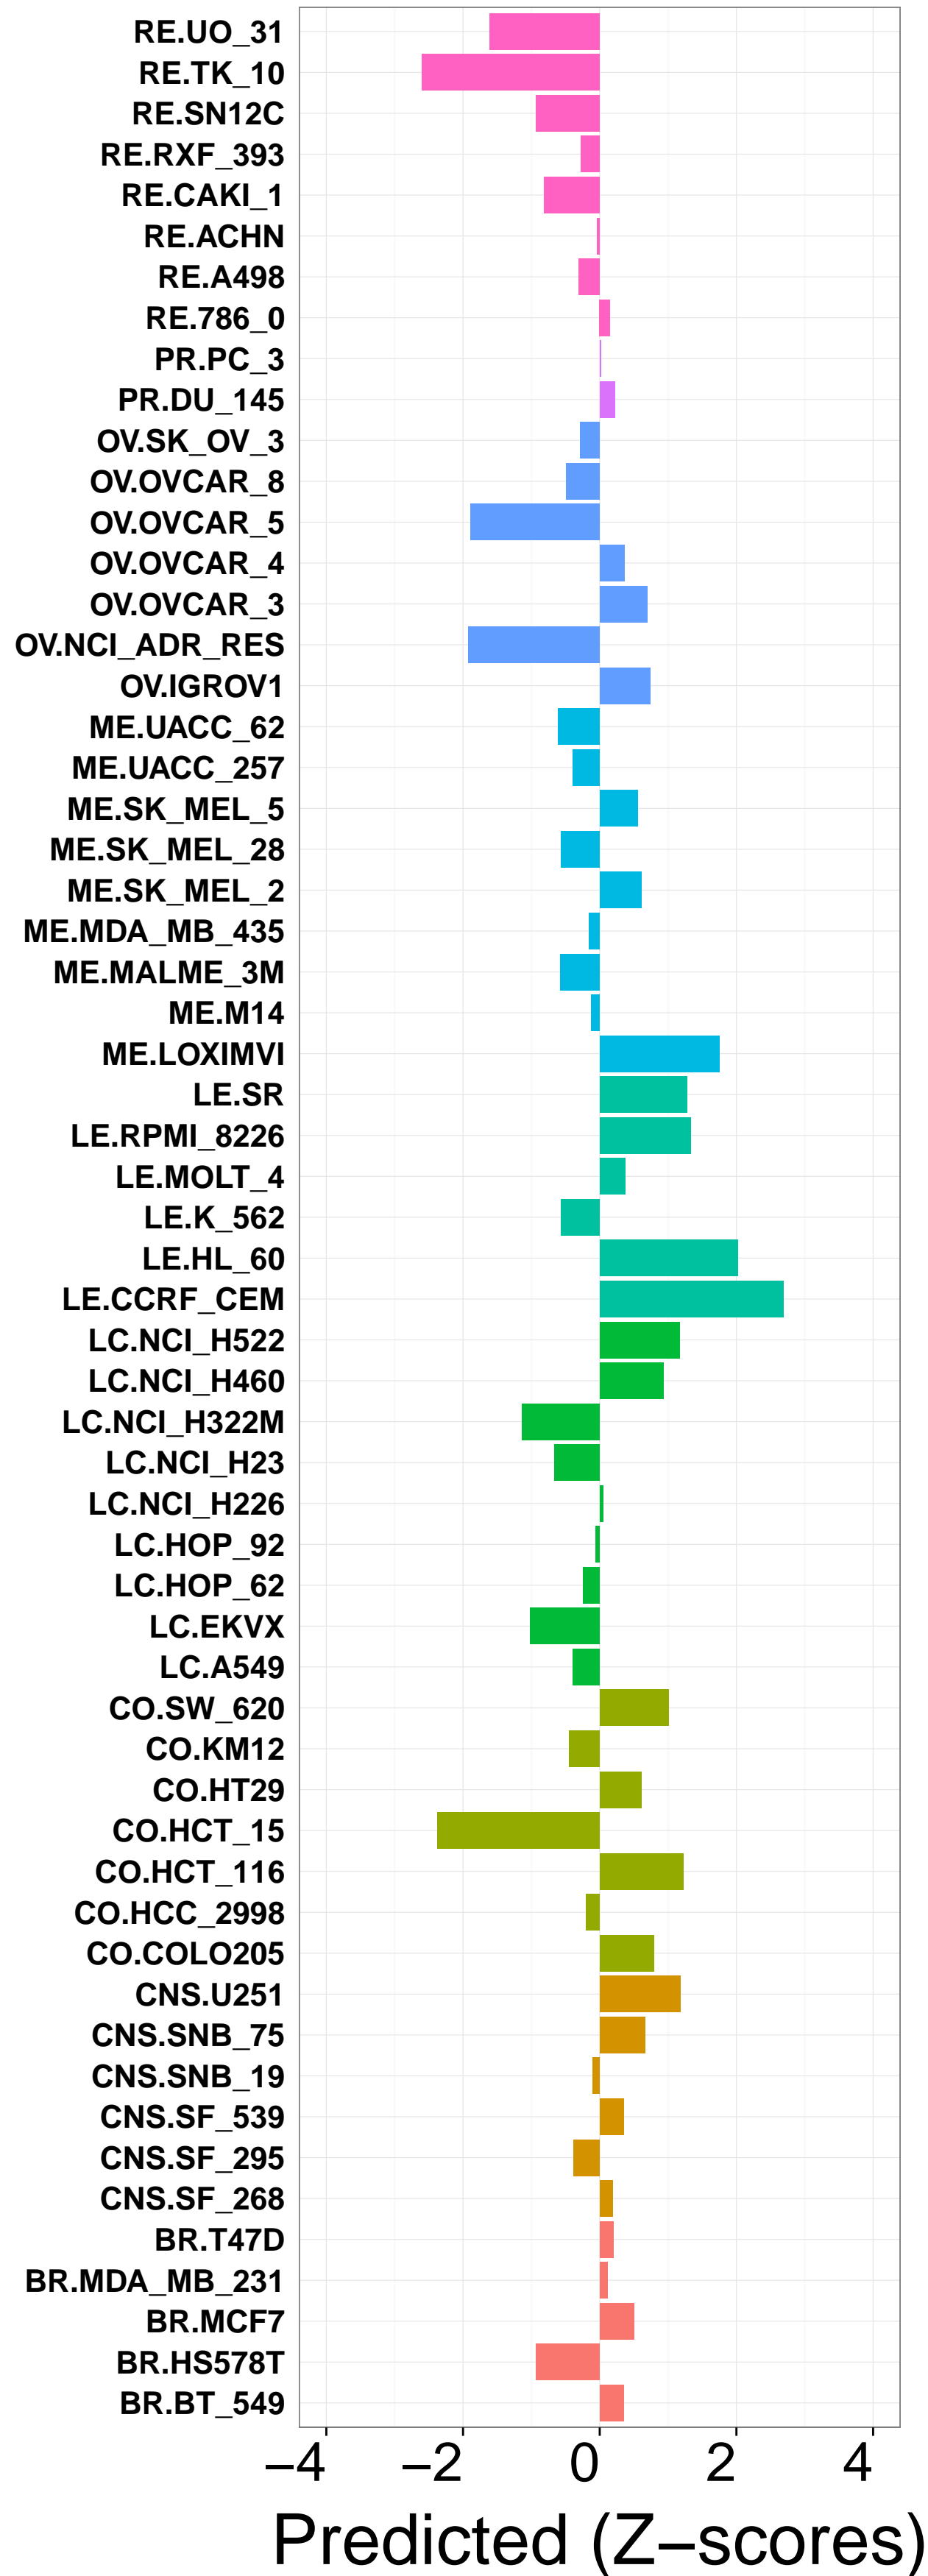

# NSC 256942, (LOCCO)

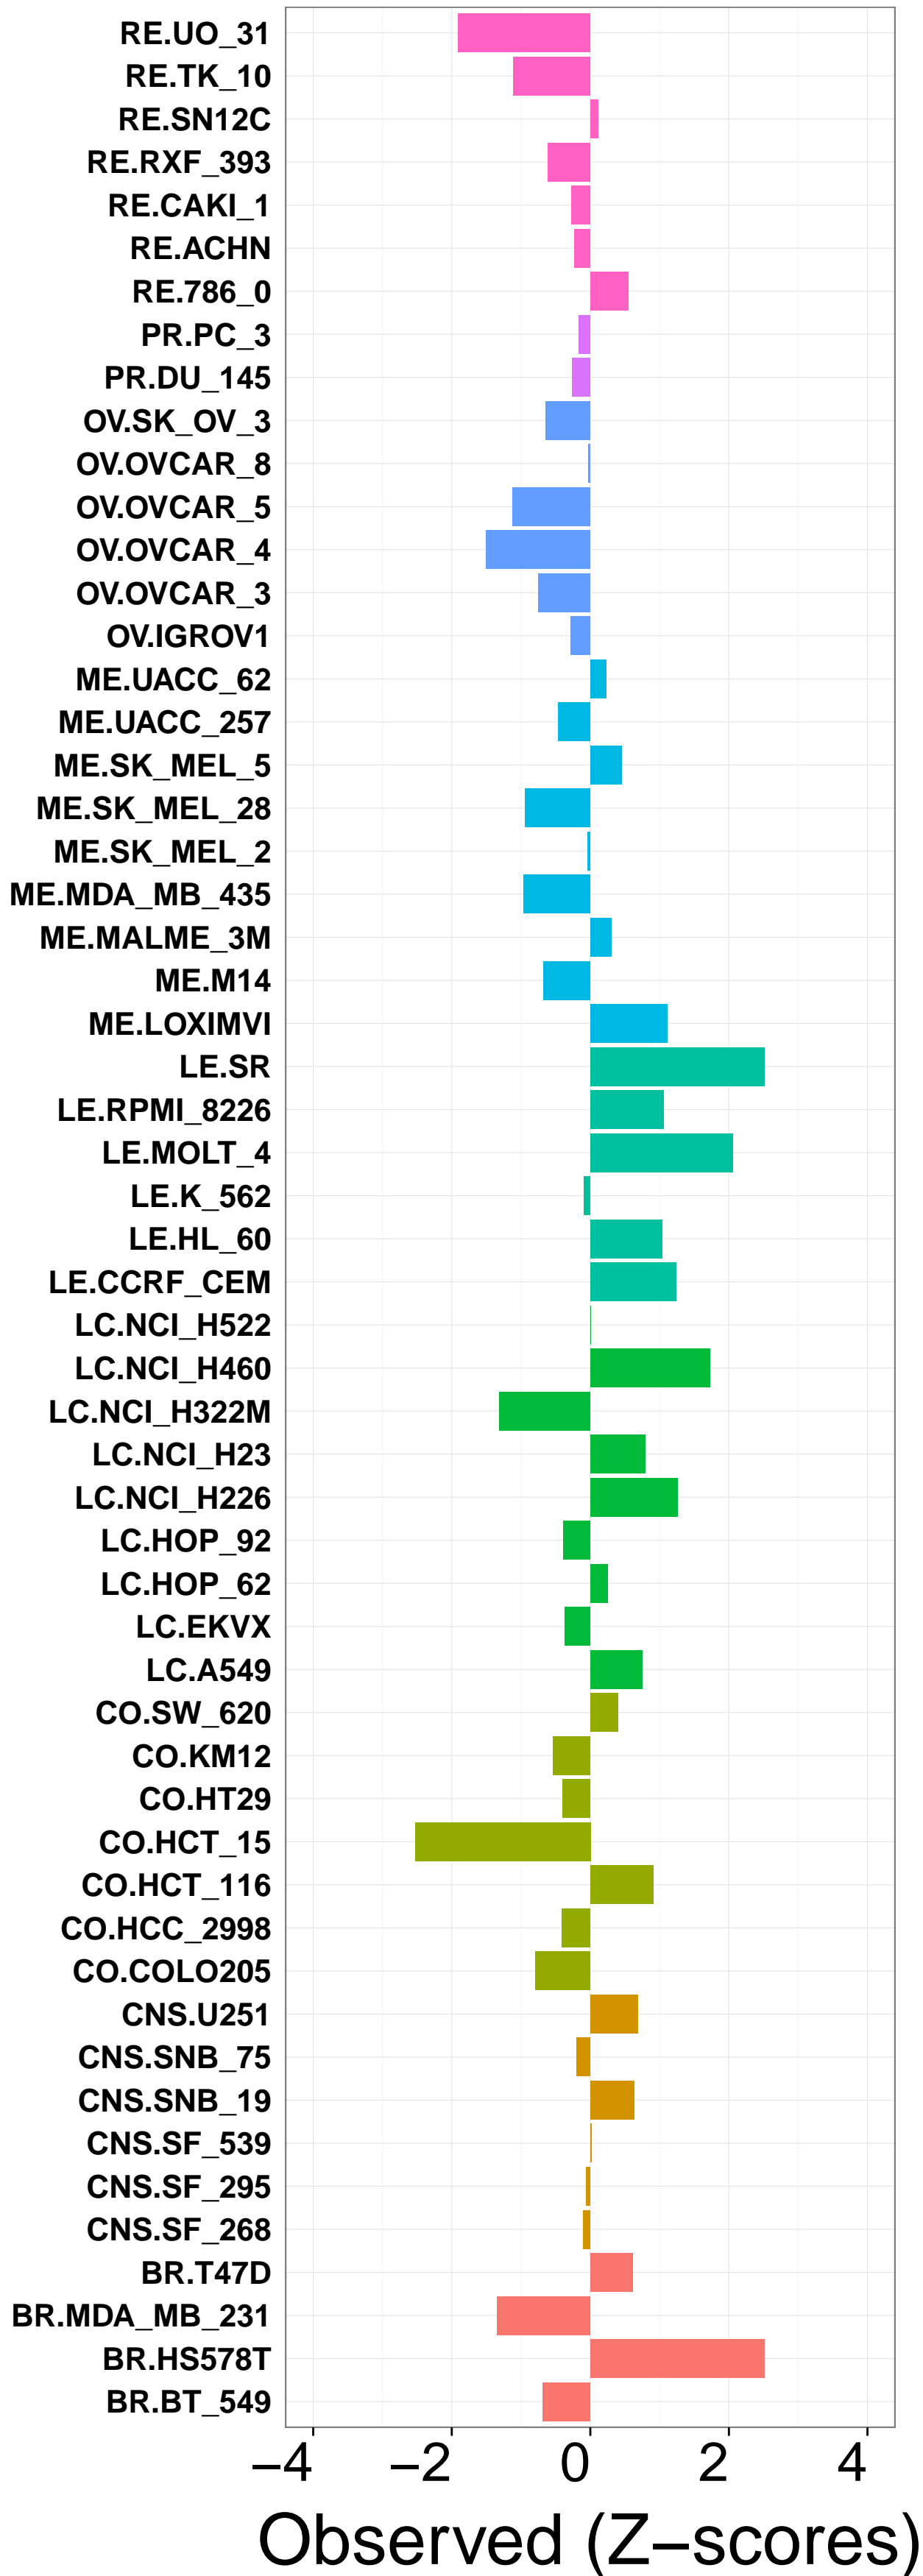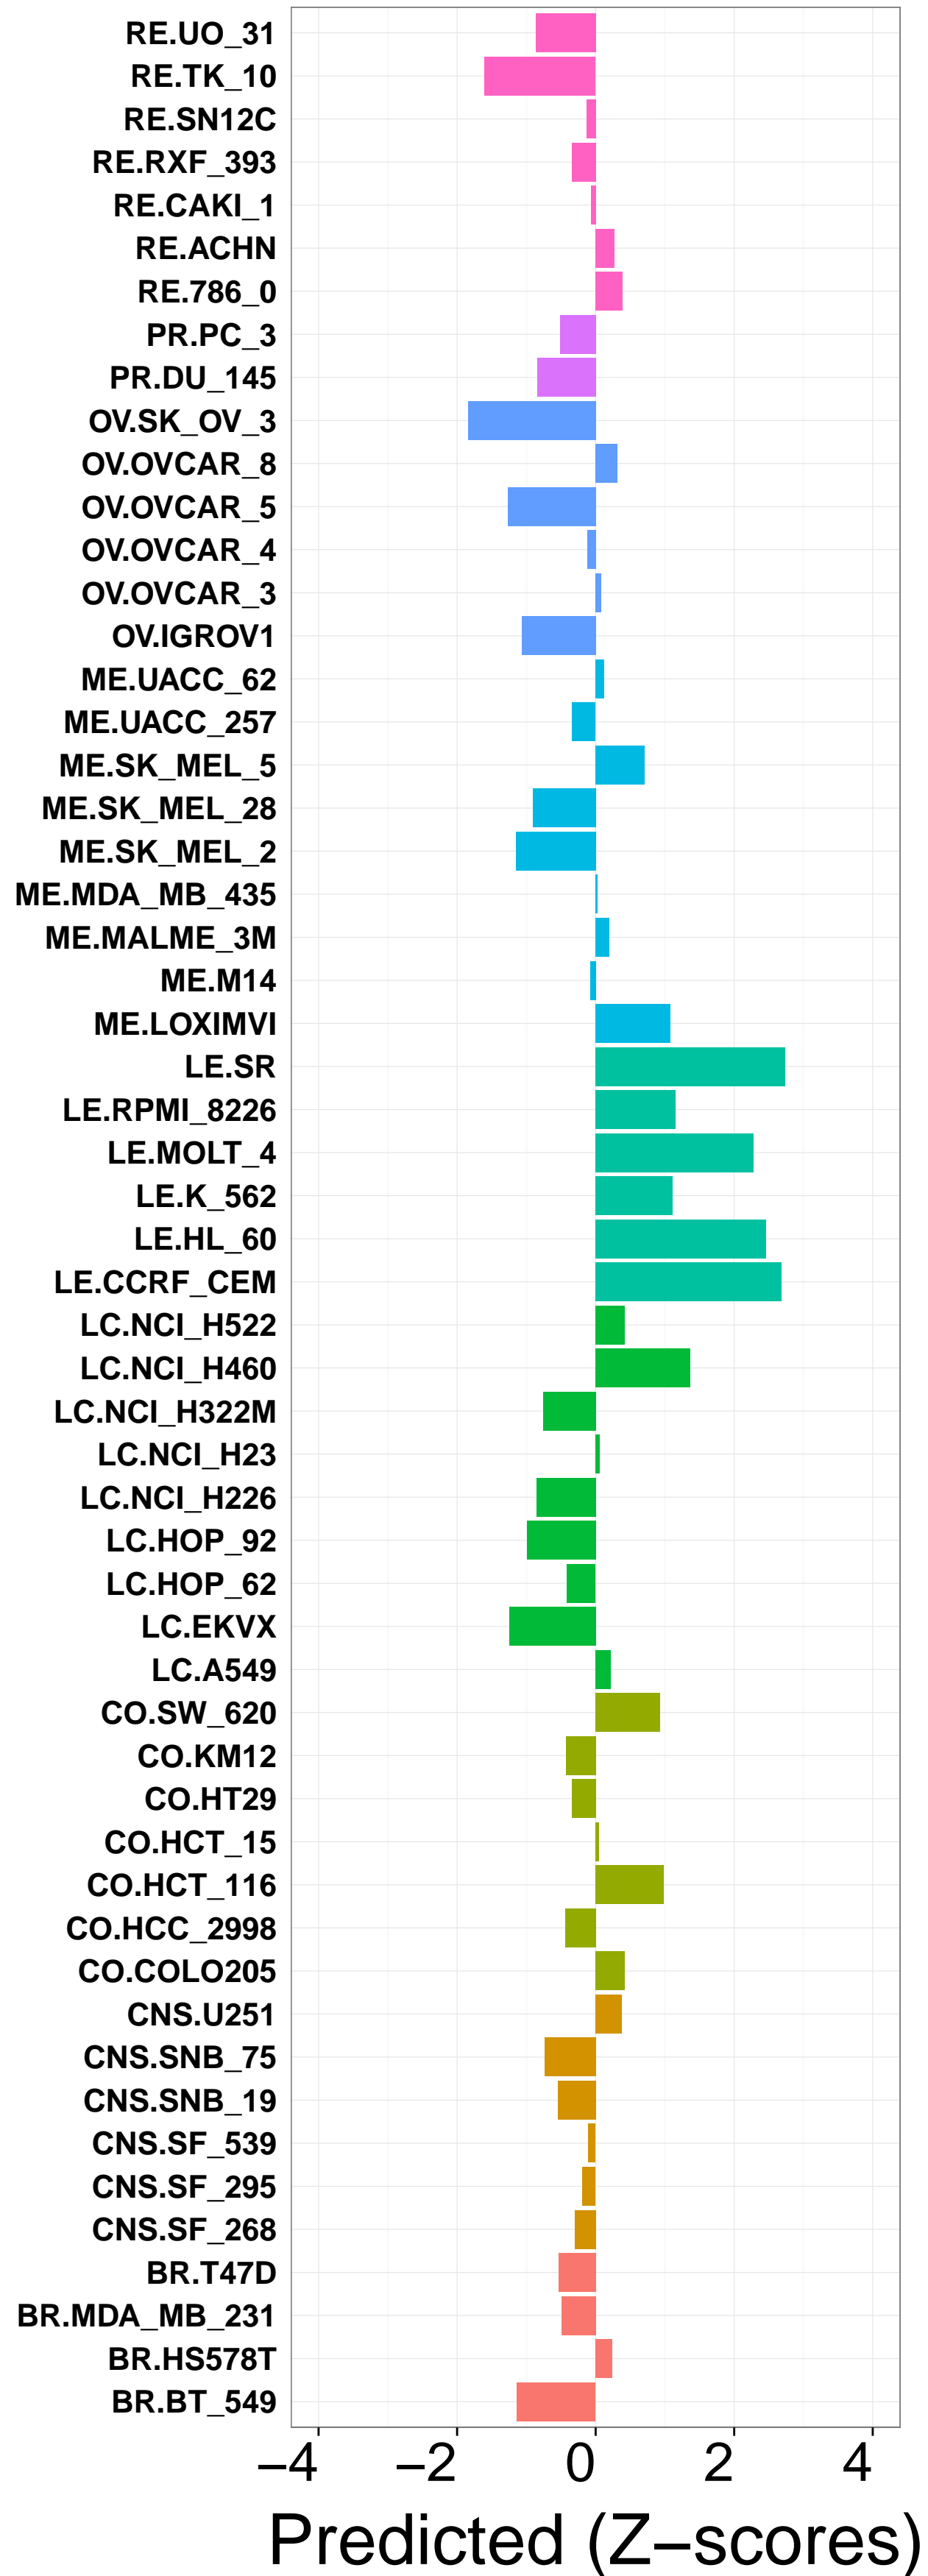

# NSC 26980, Mitomycin (LOCCO)

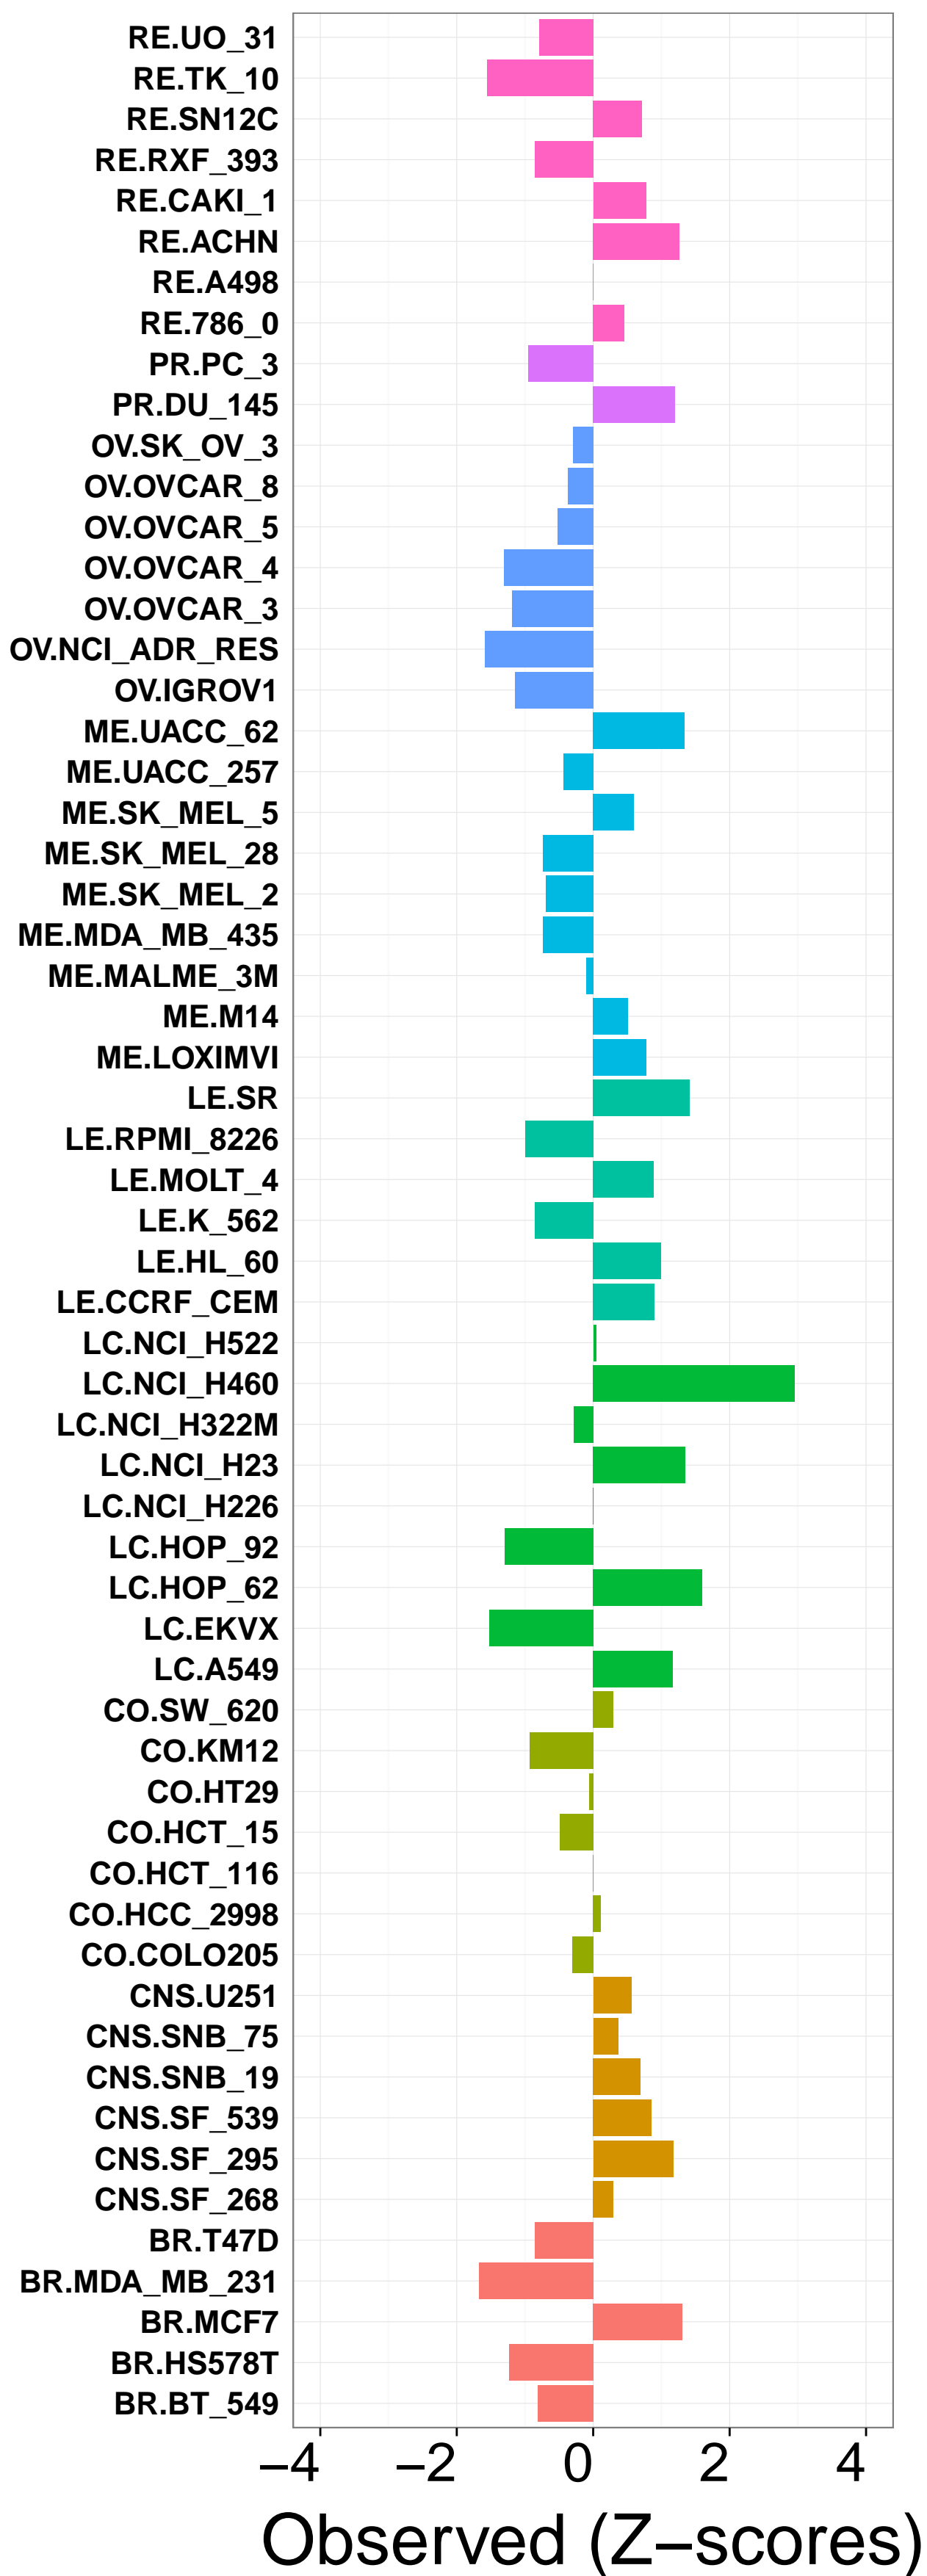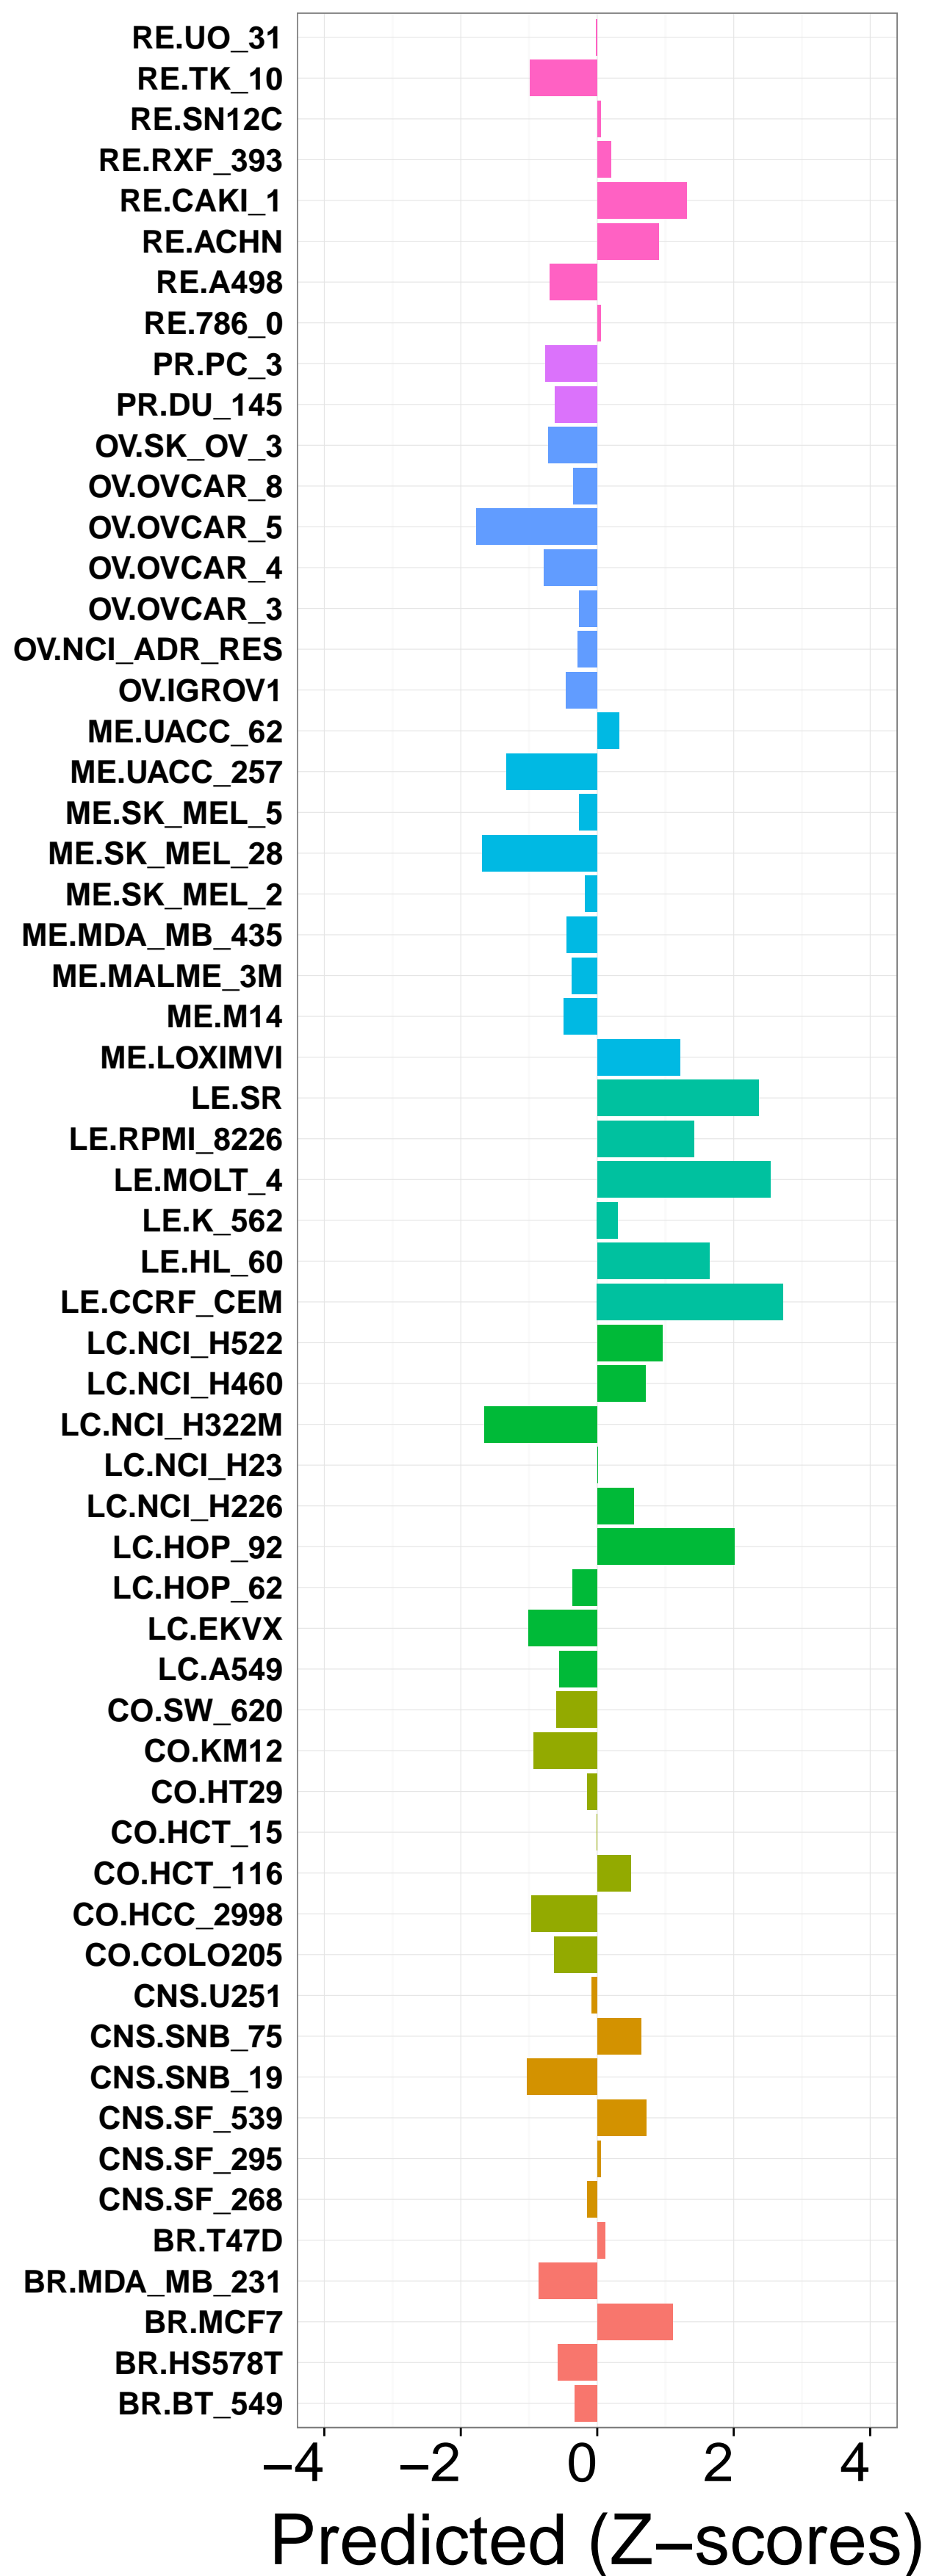

# NSC 27640, Floxuridine (LOCCO)

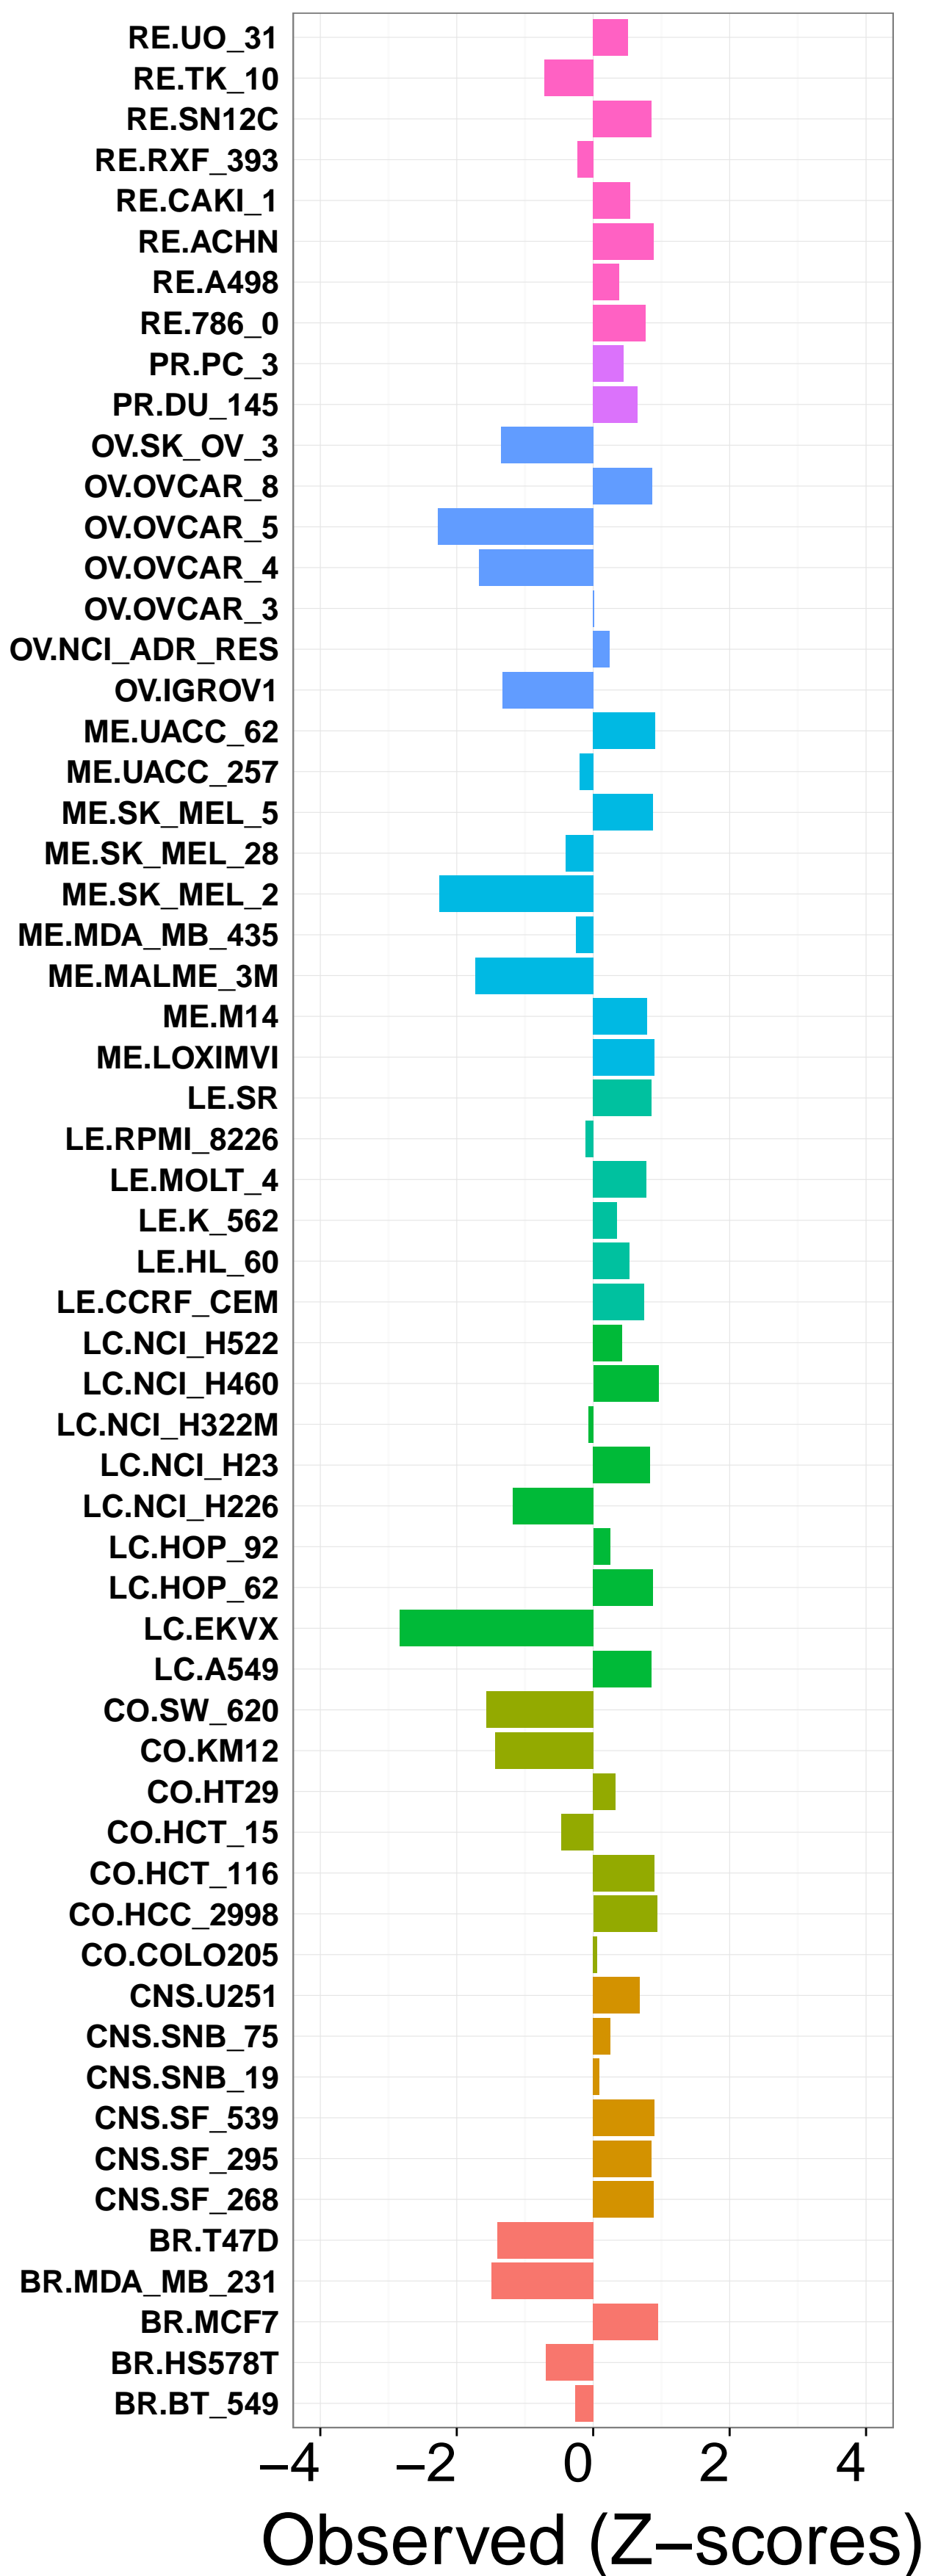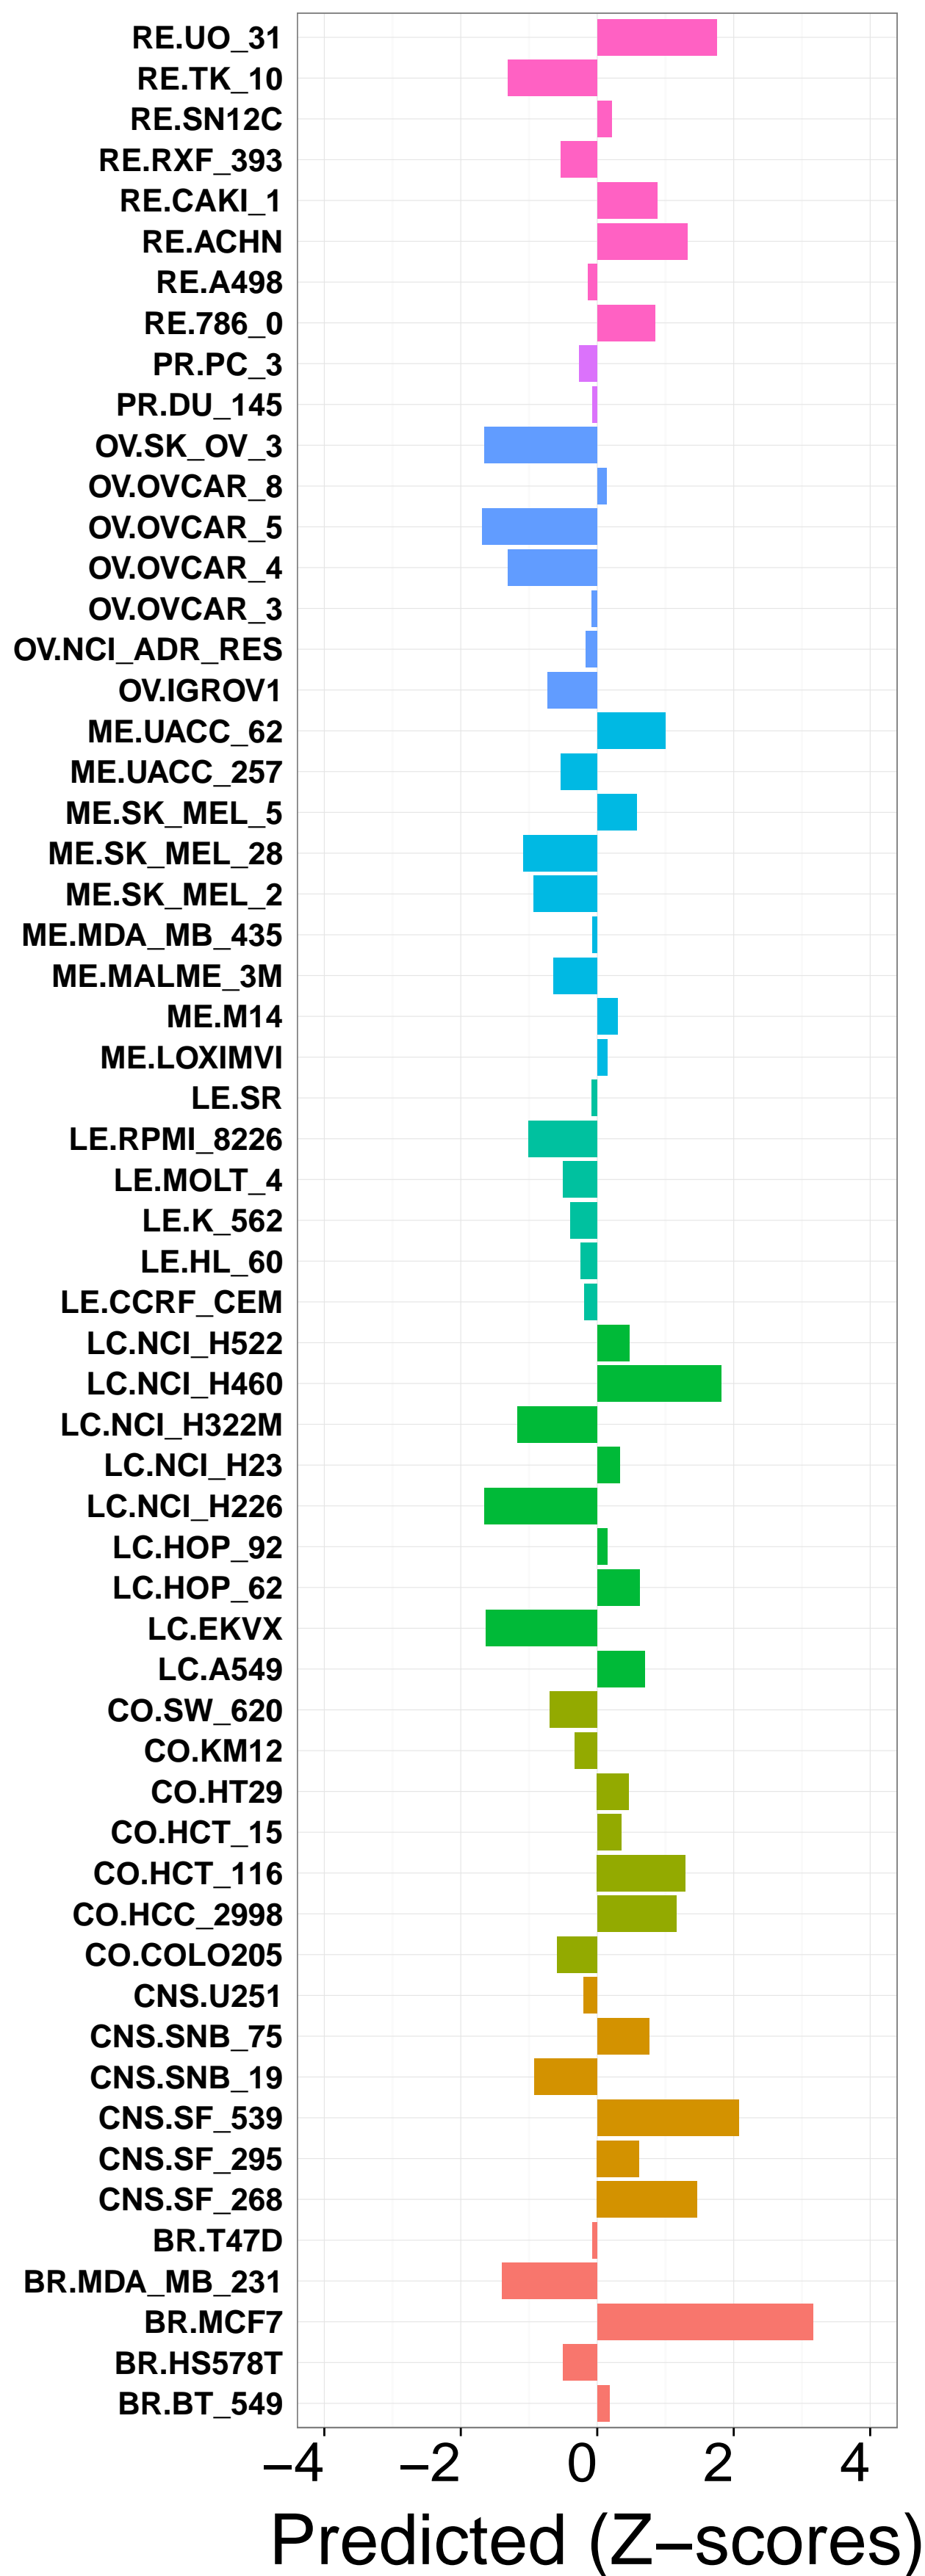

# NSC 279836, (LOCCO)

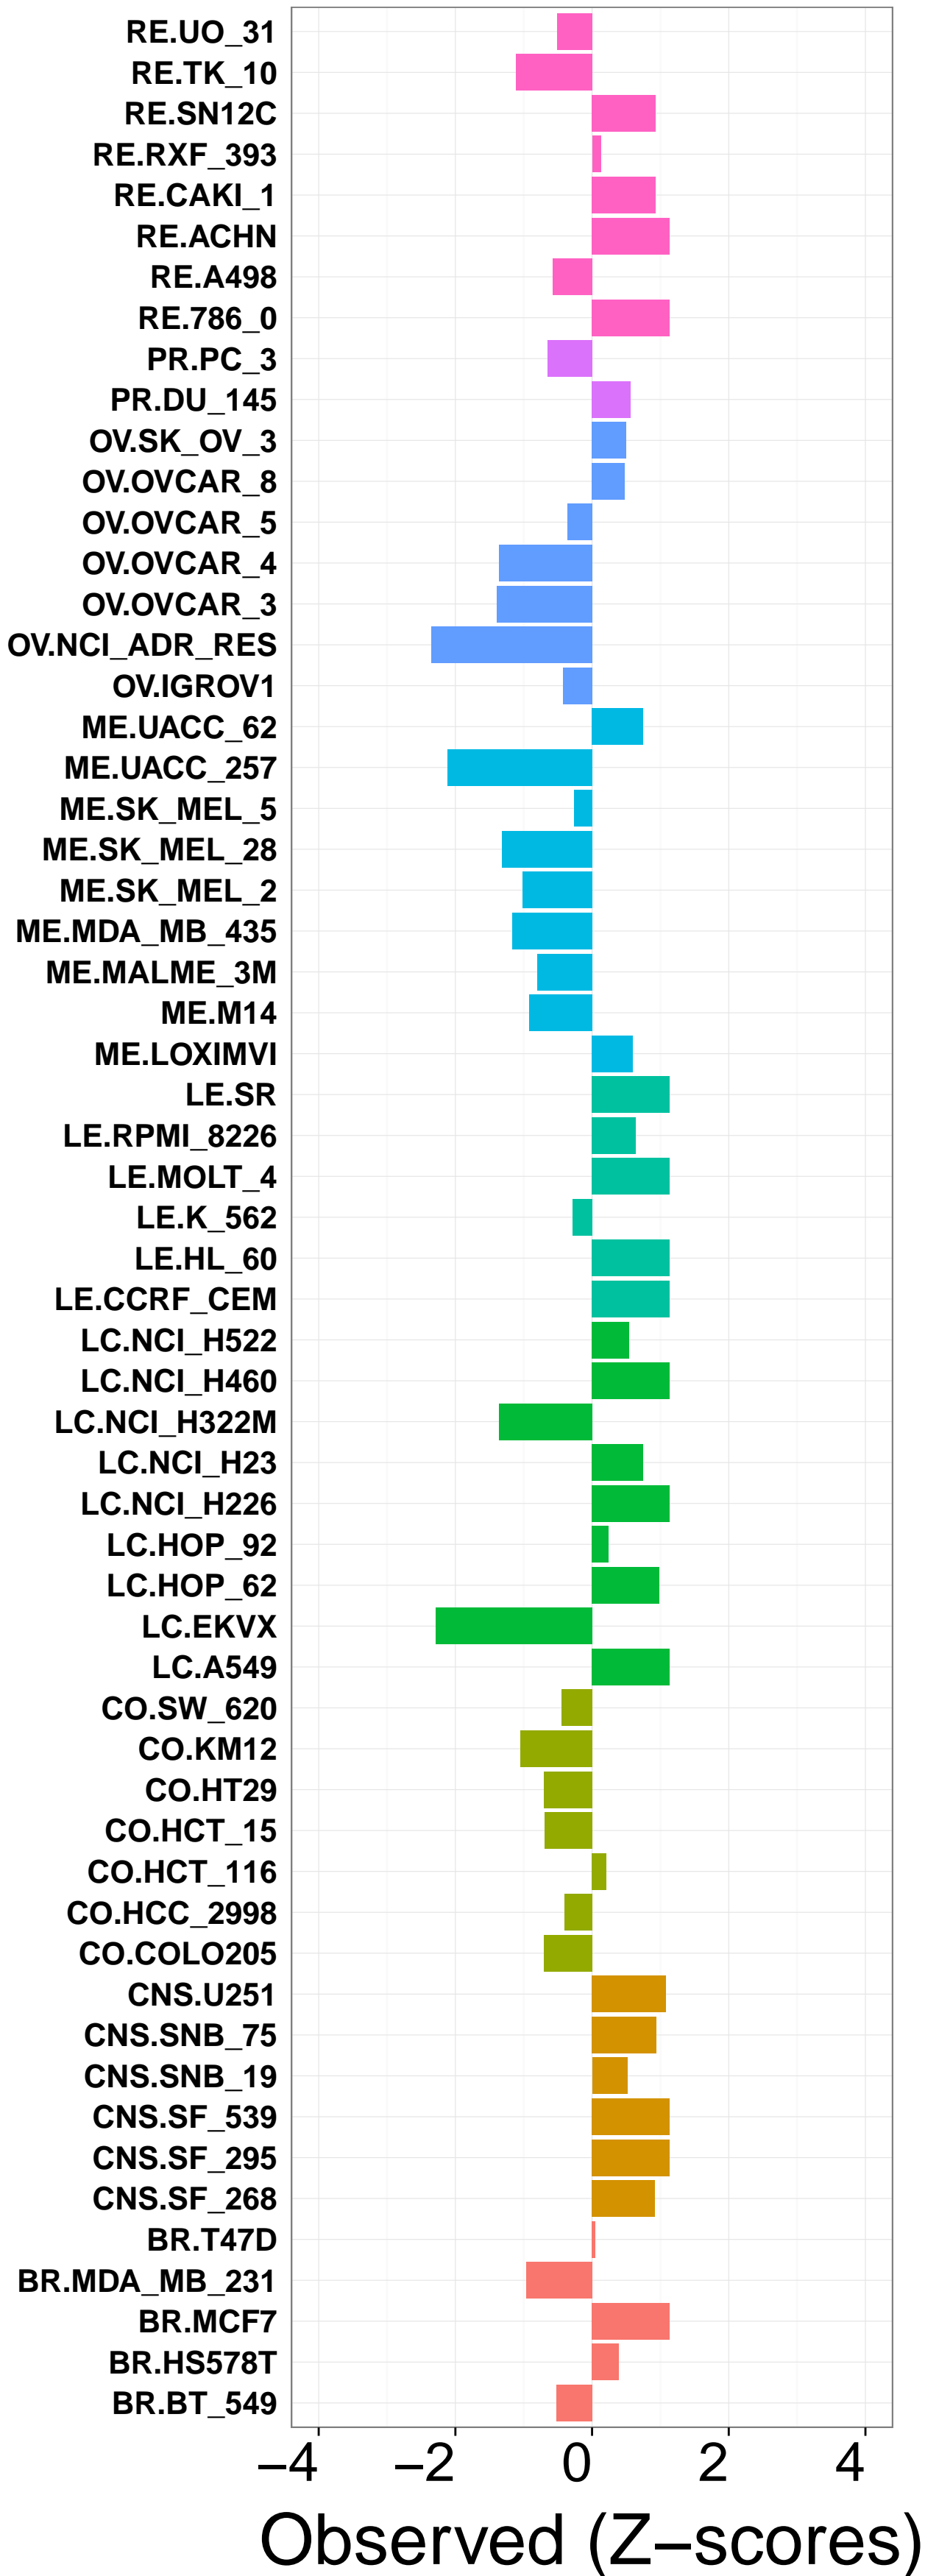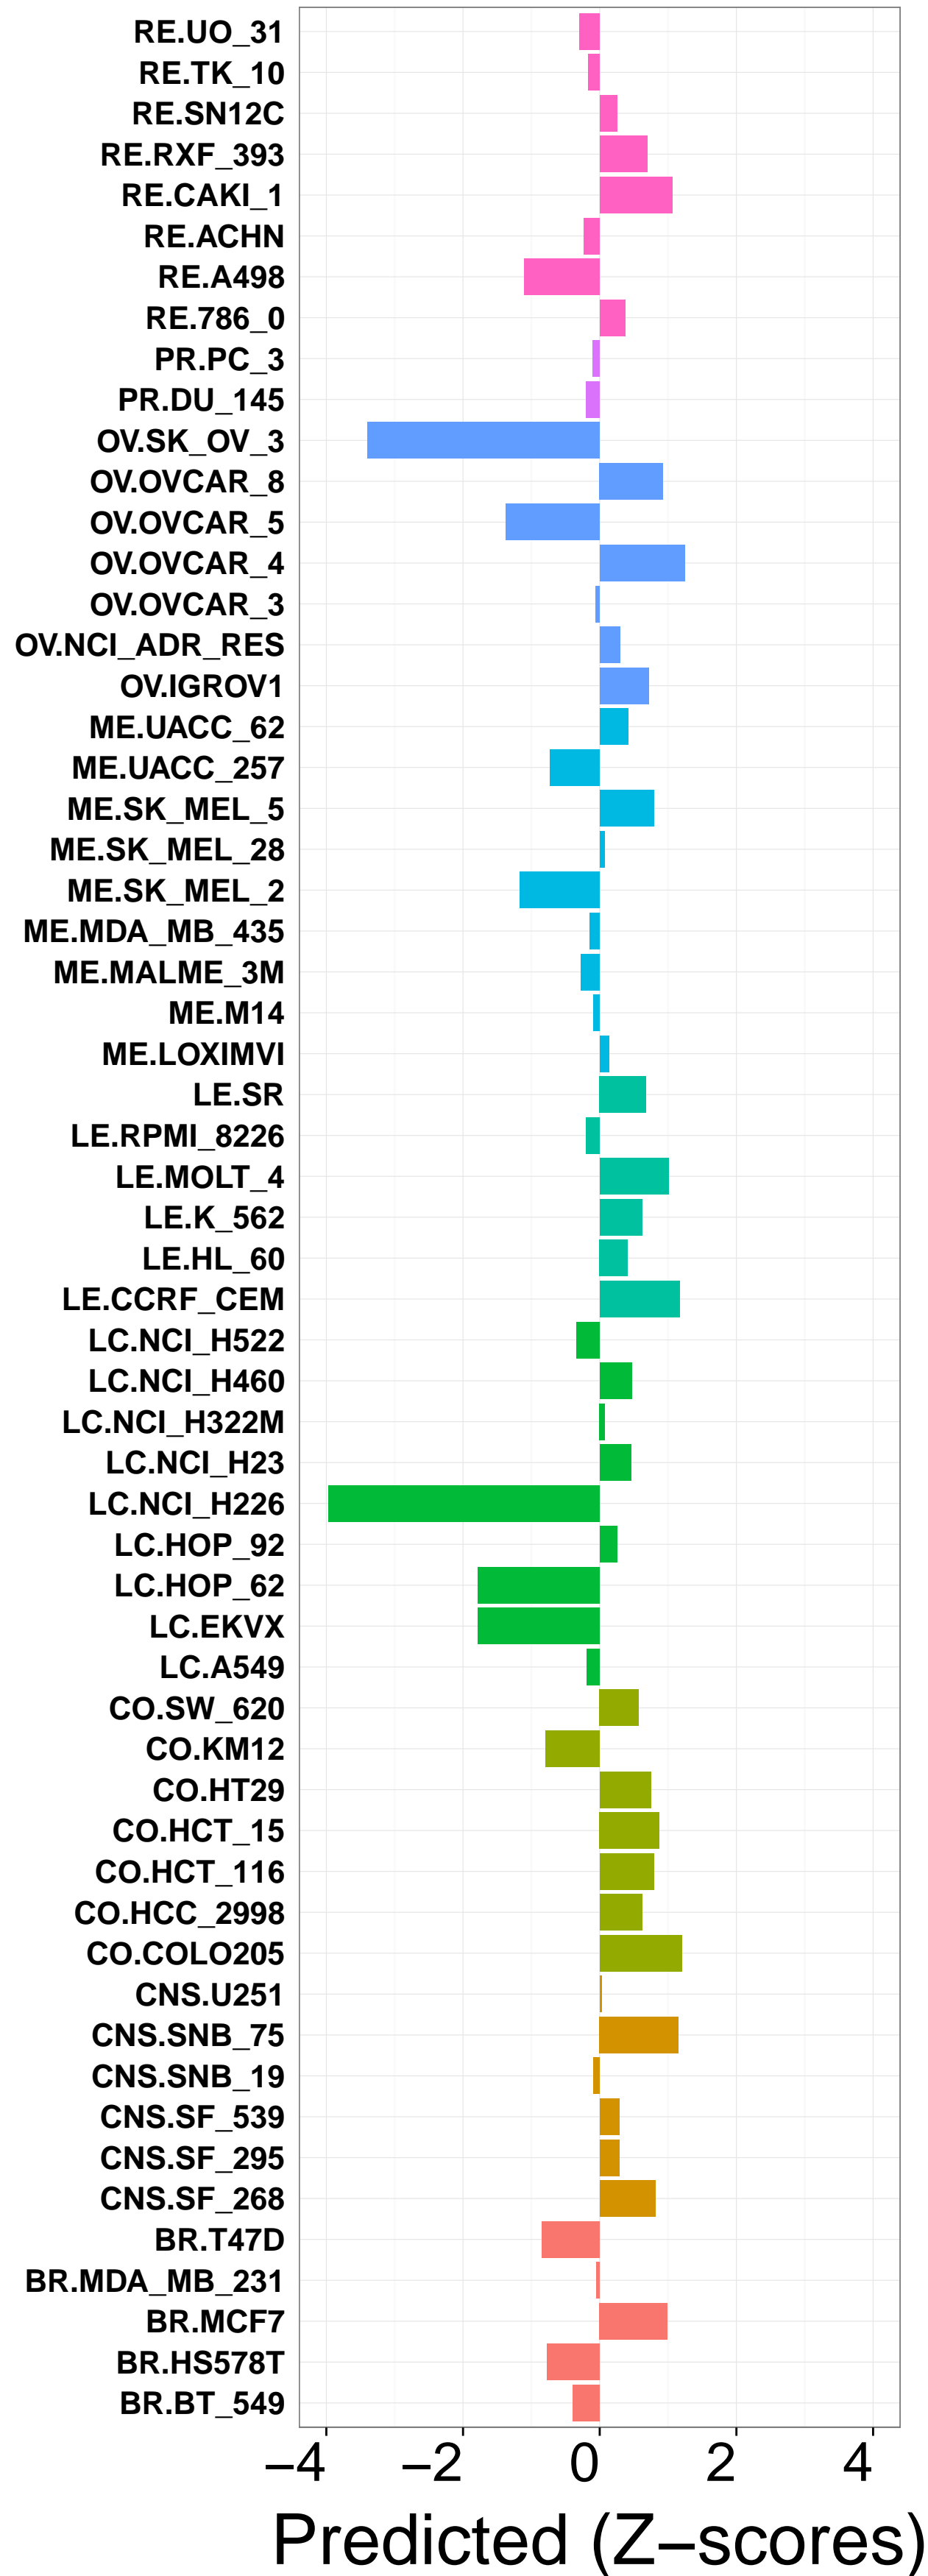



# NSC 280594, (LOCCO)

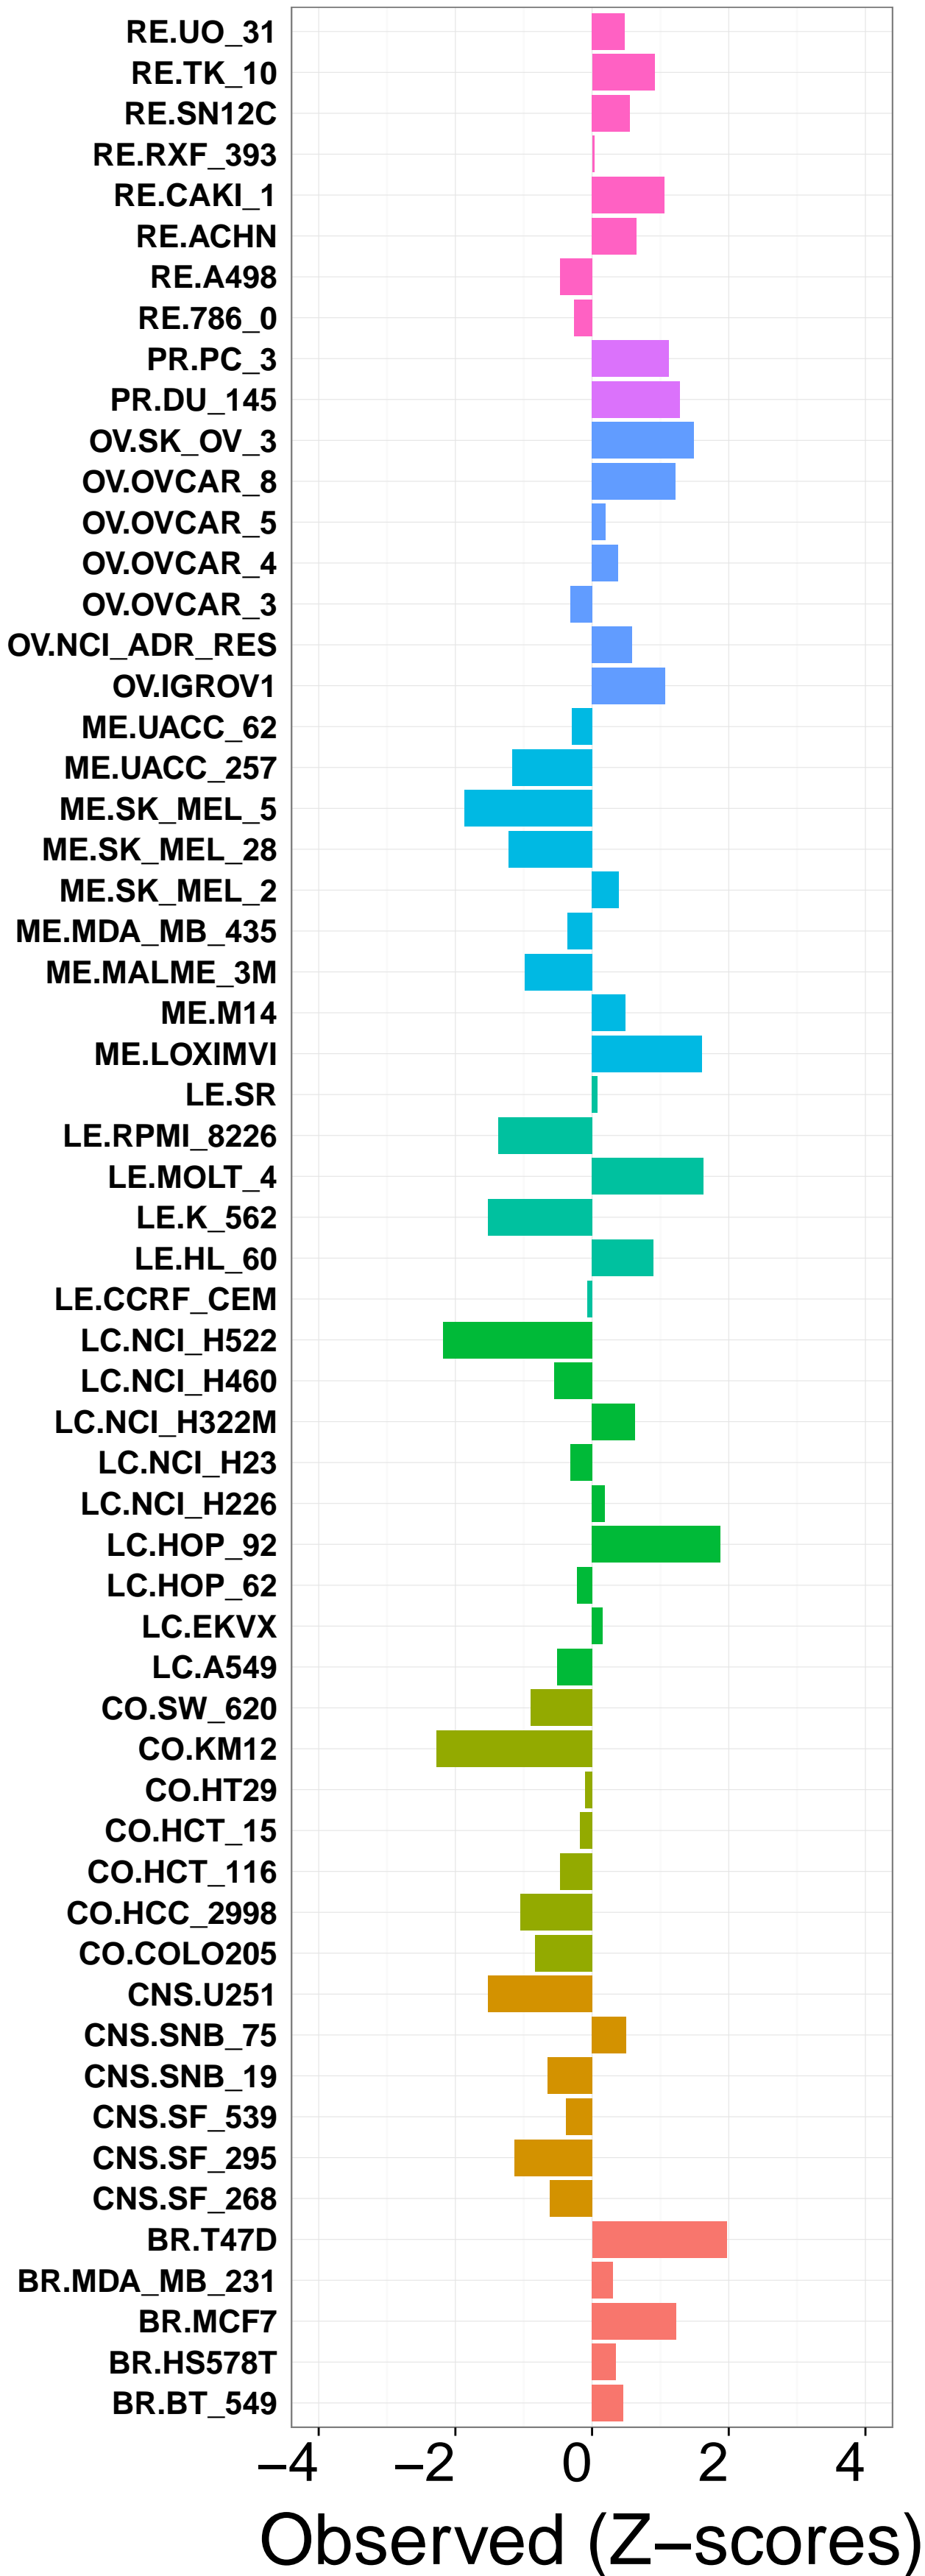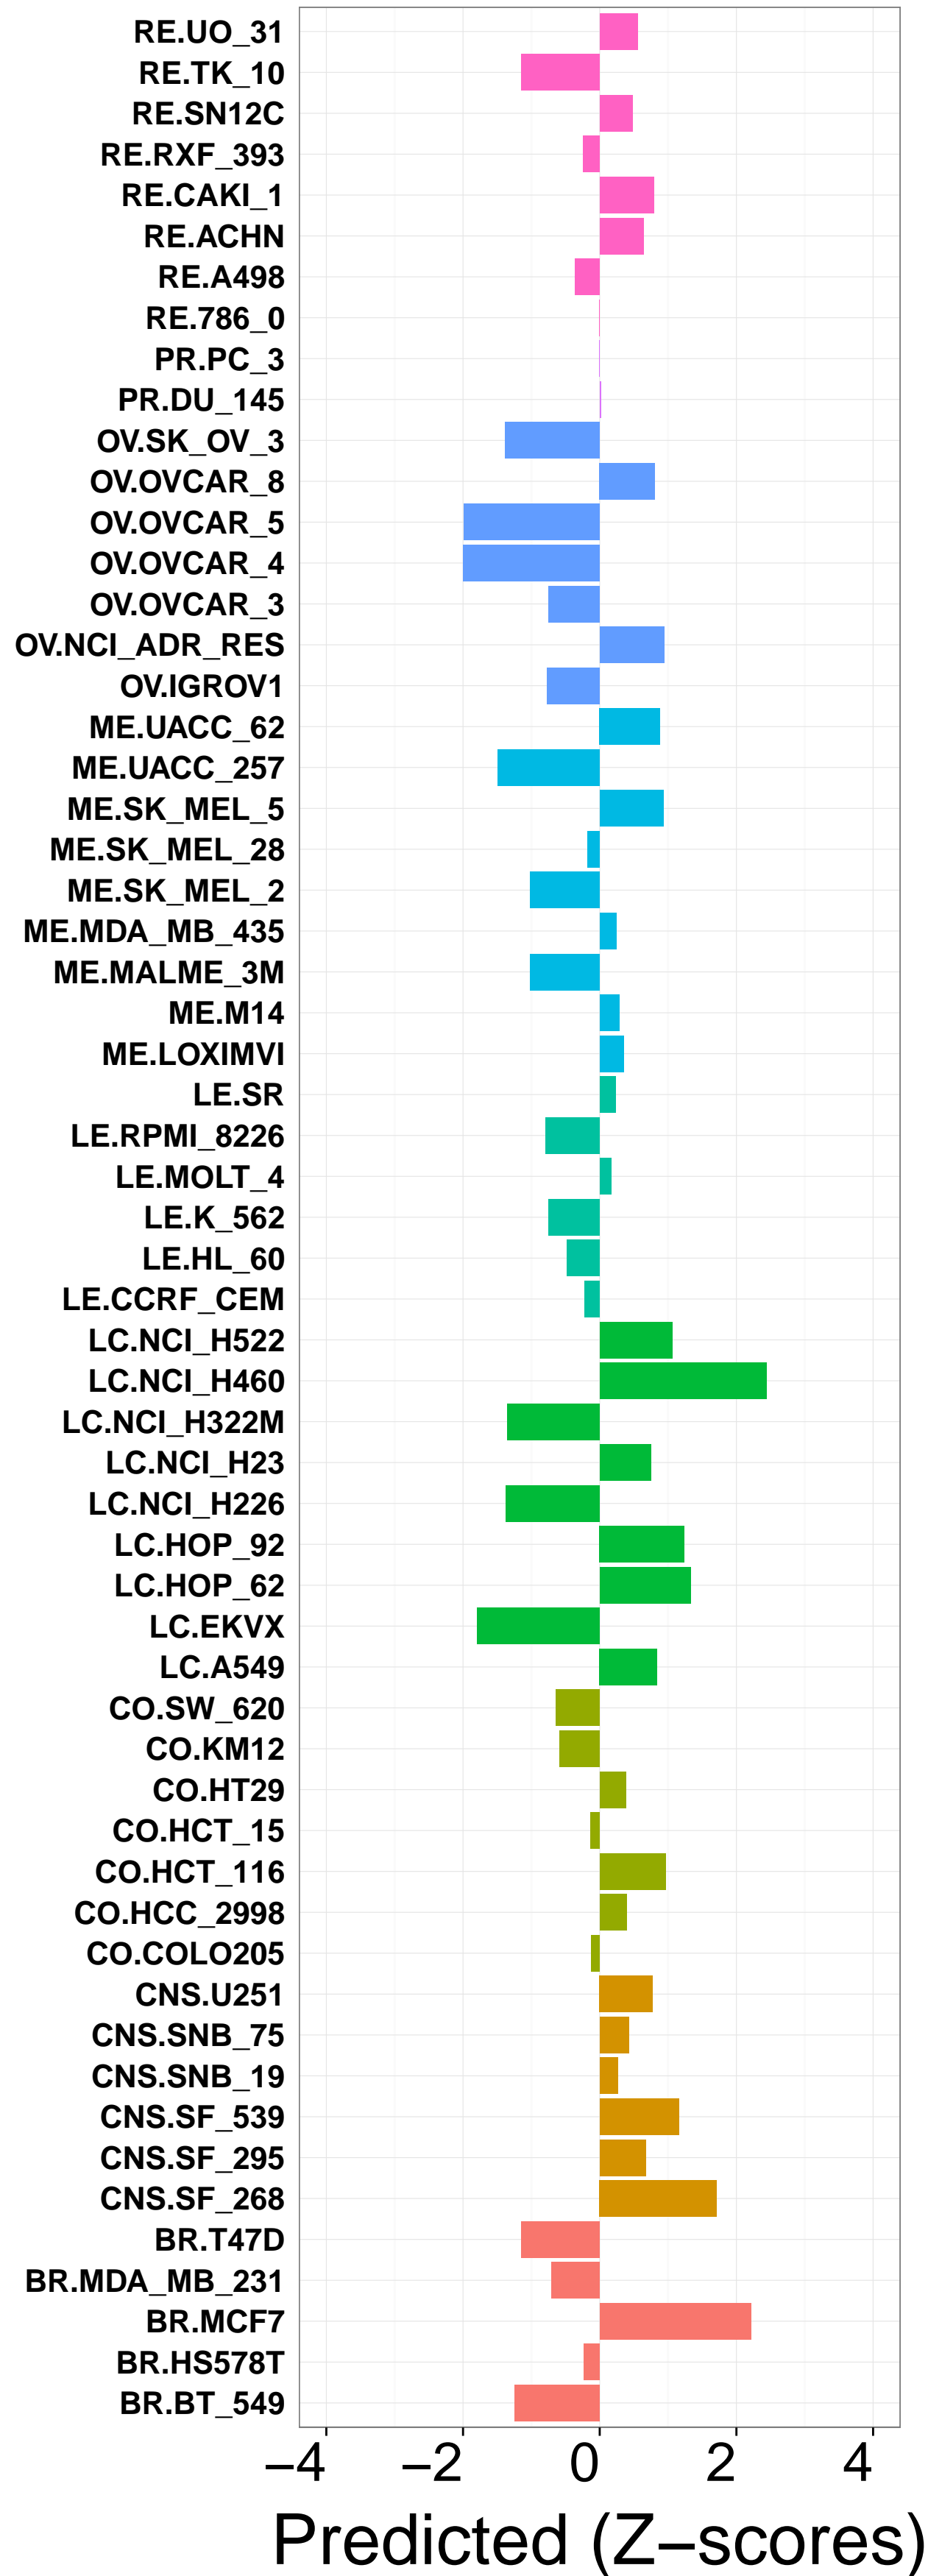

# NSC 281612, (LOCCO)

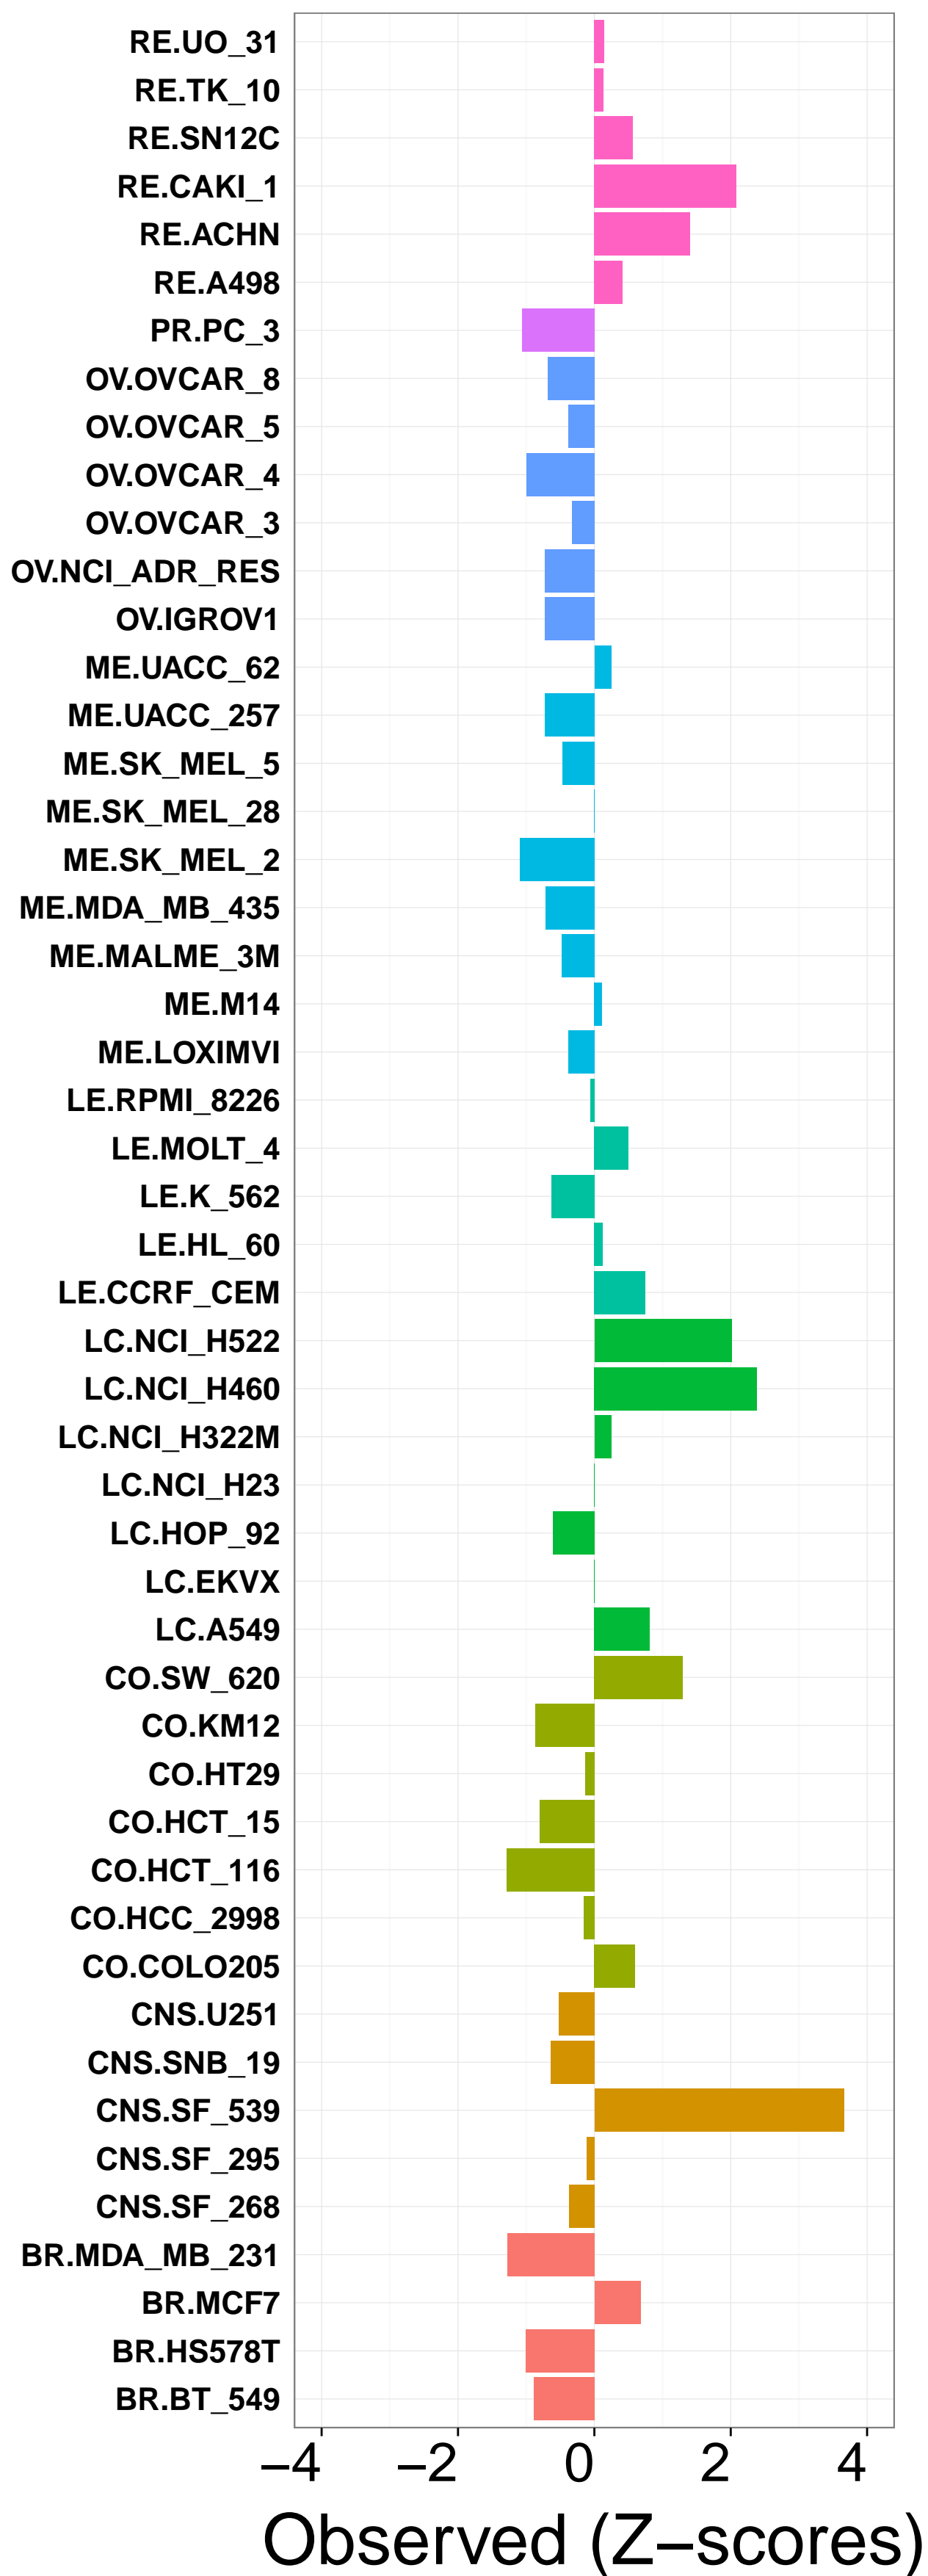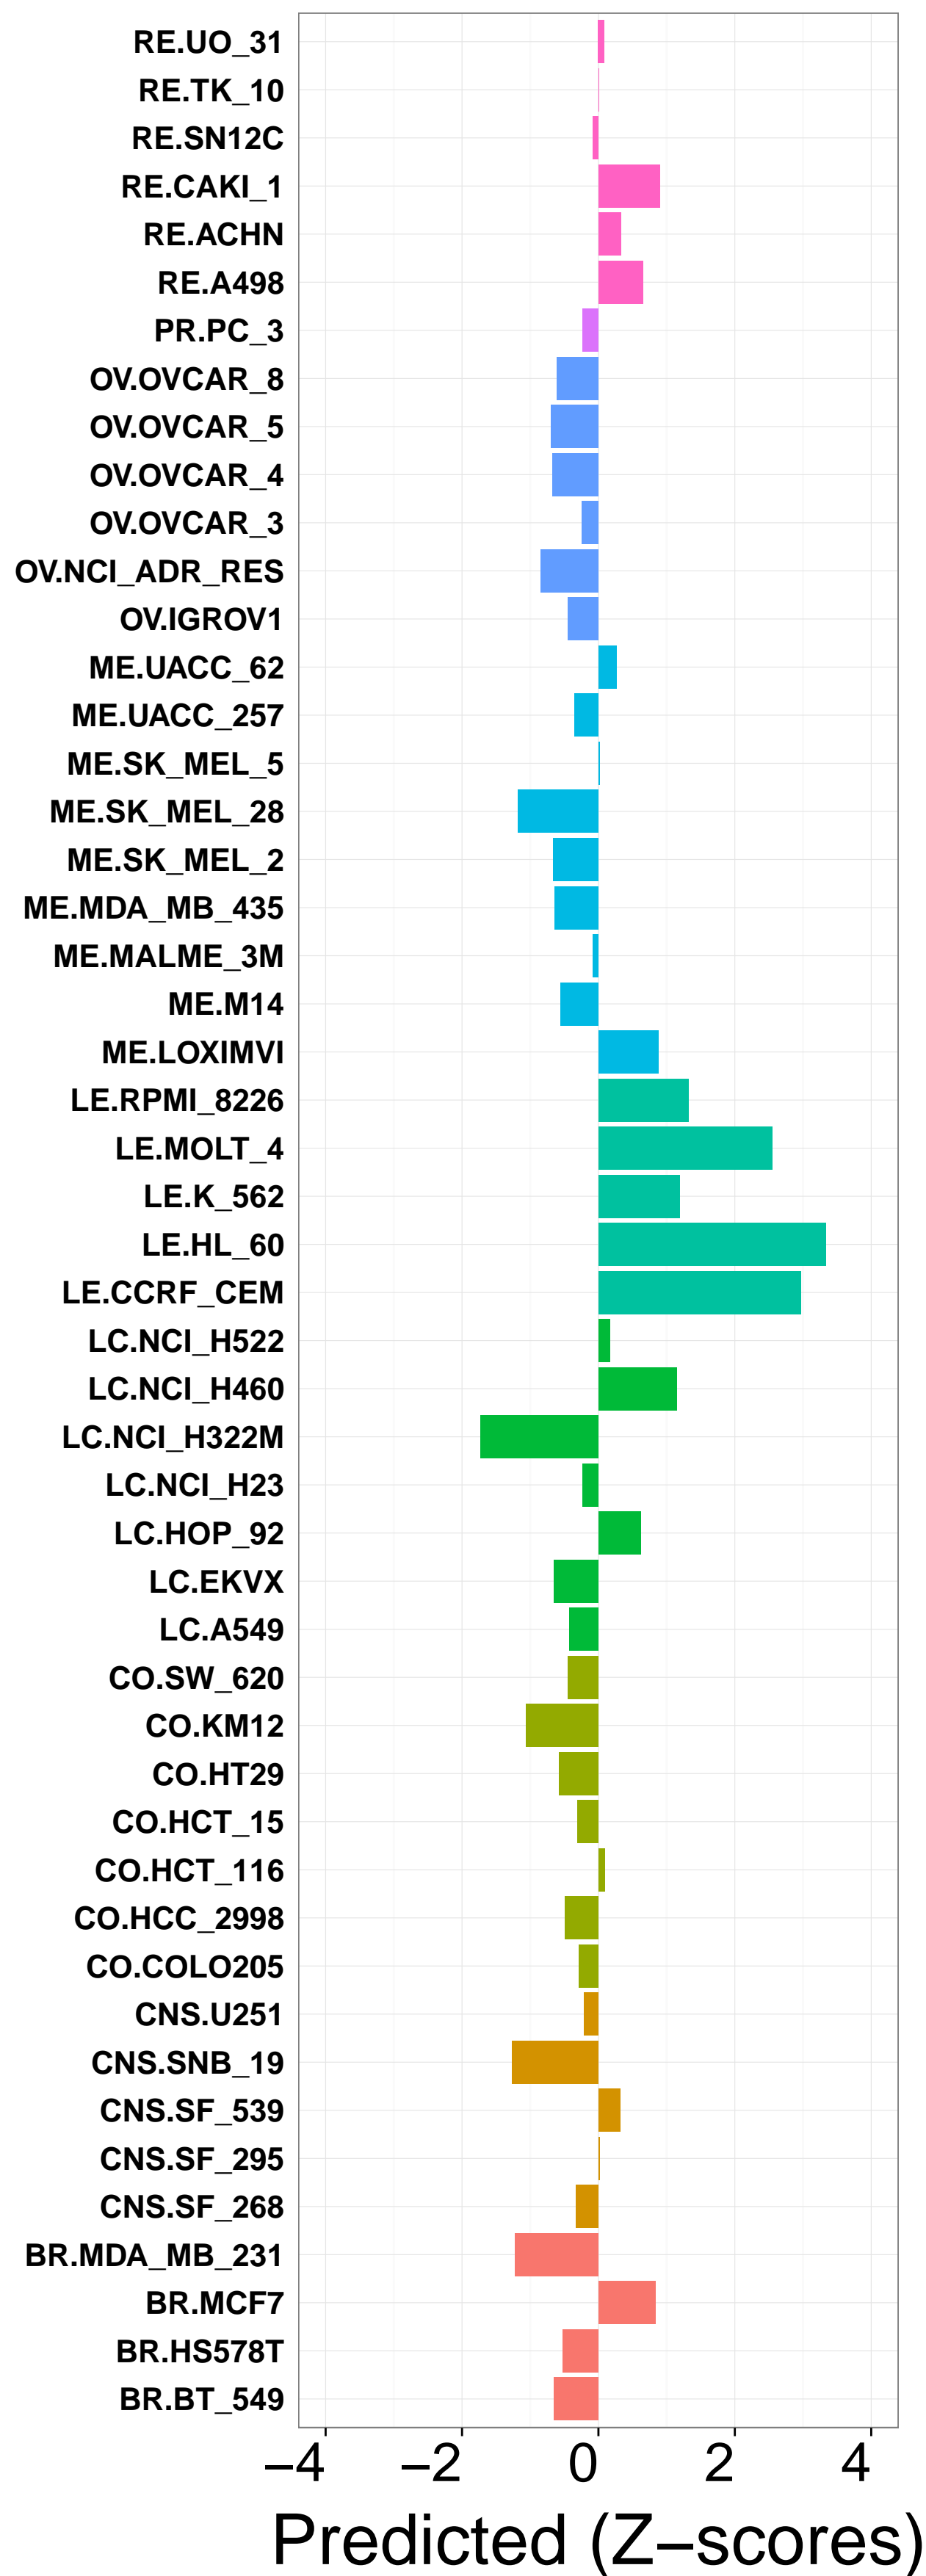

# NSC 287459, (LOCCO)

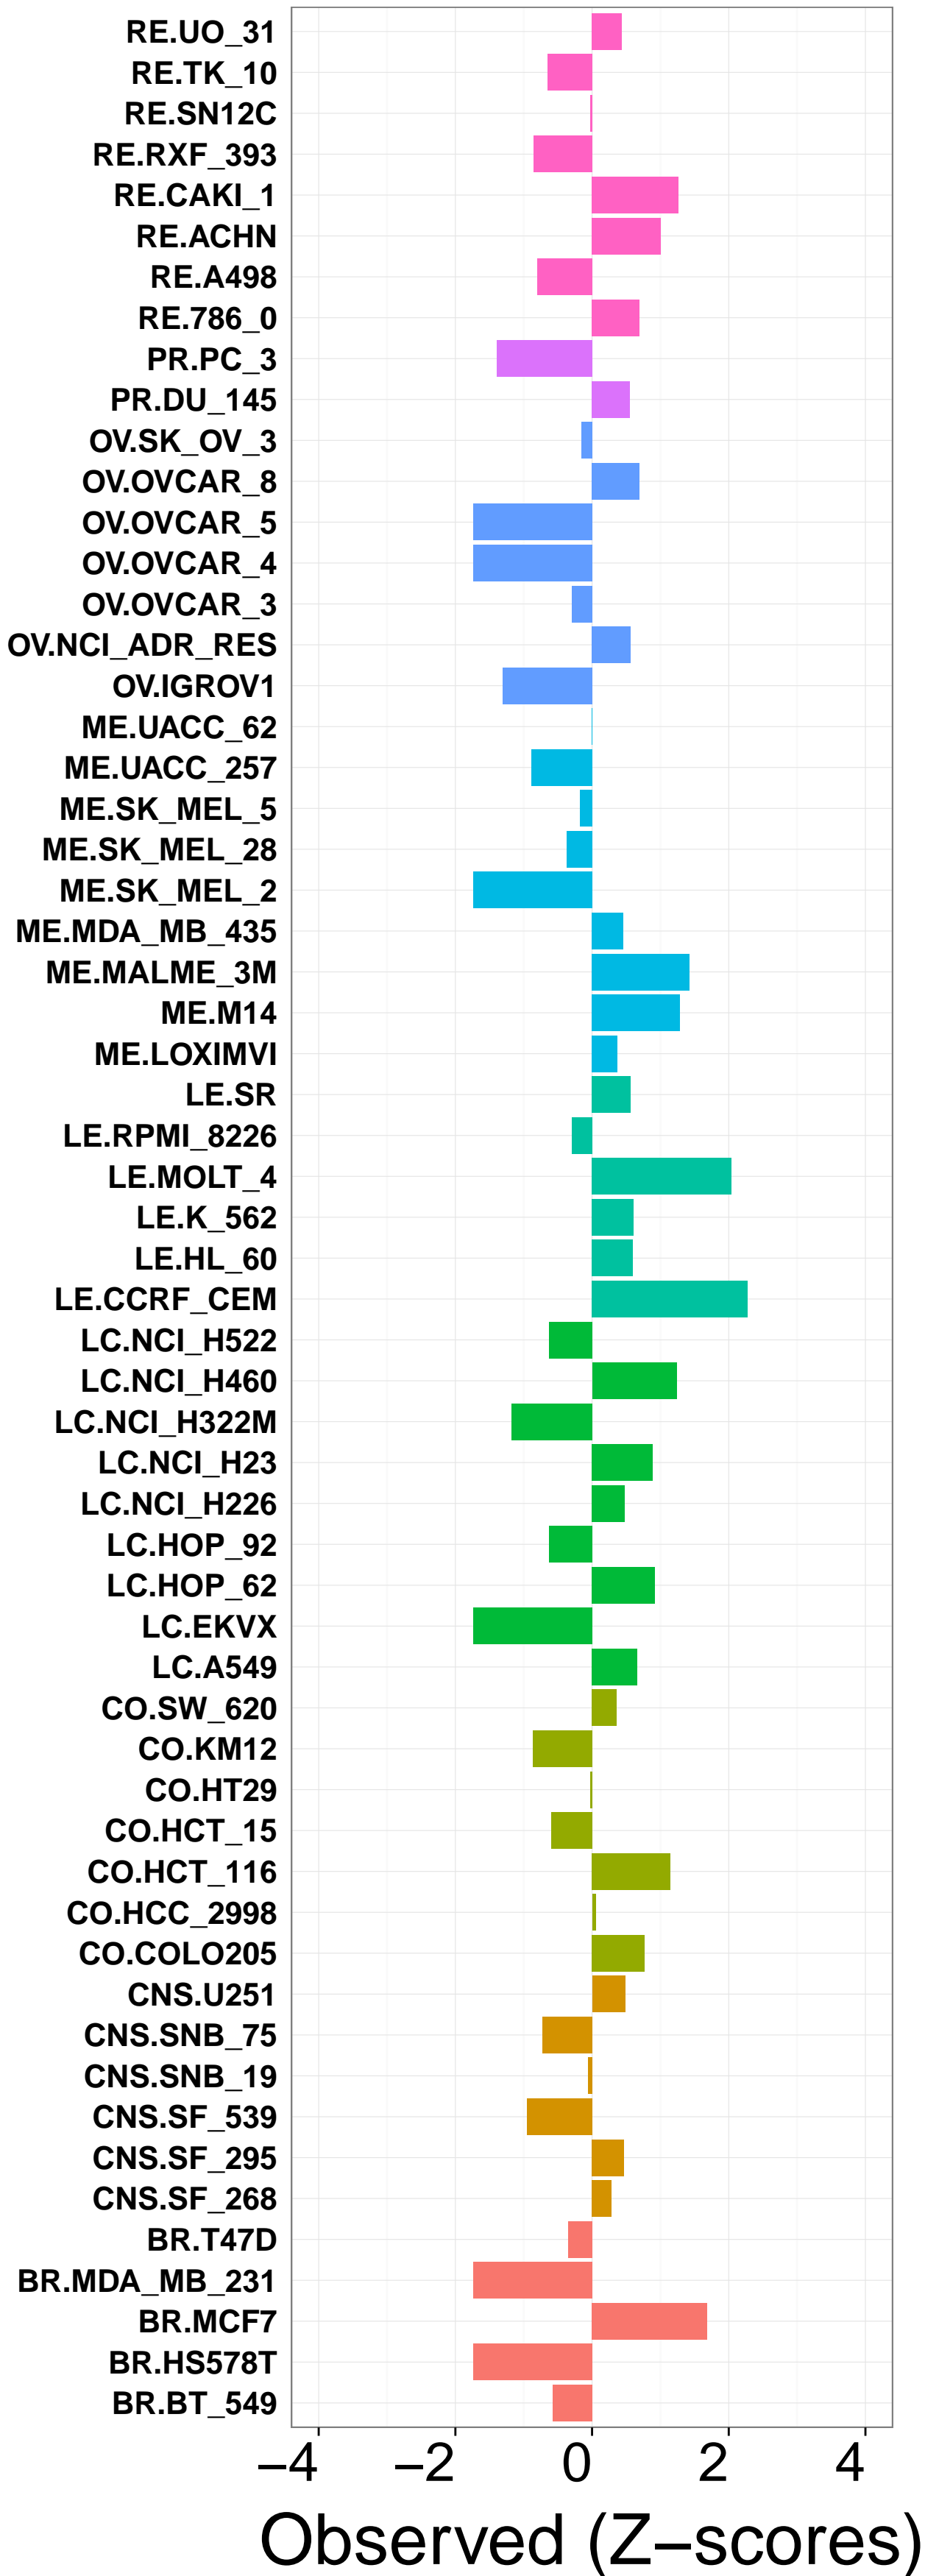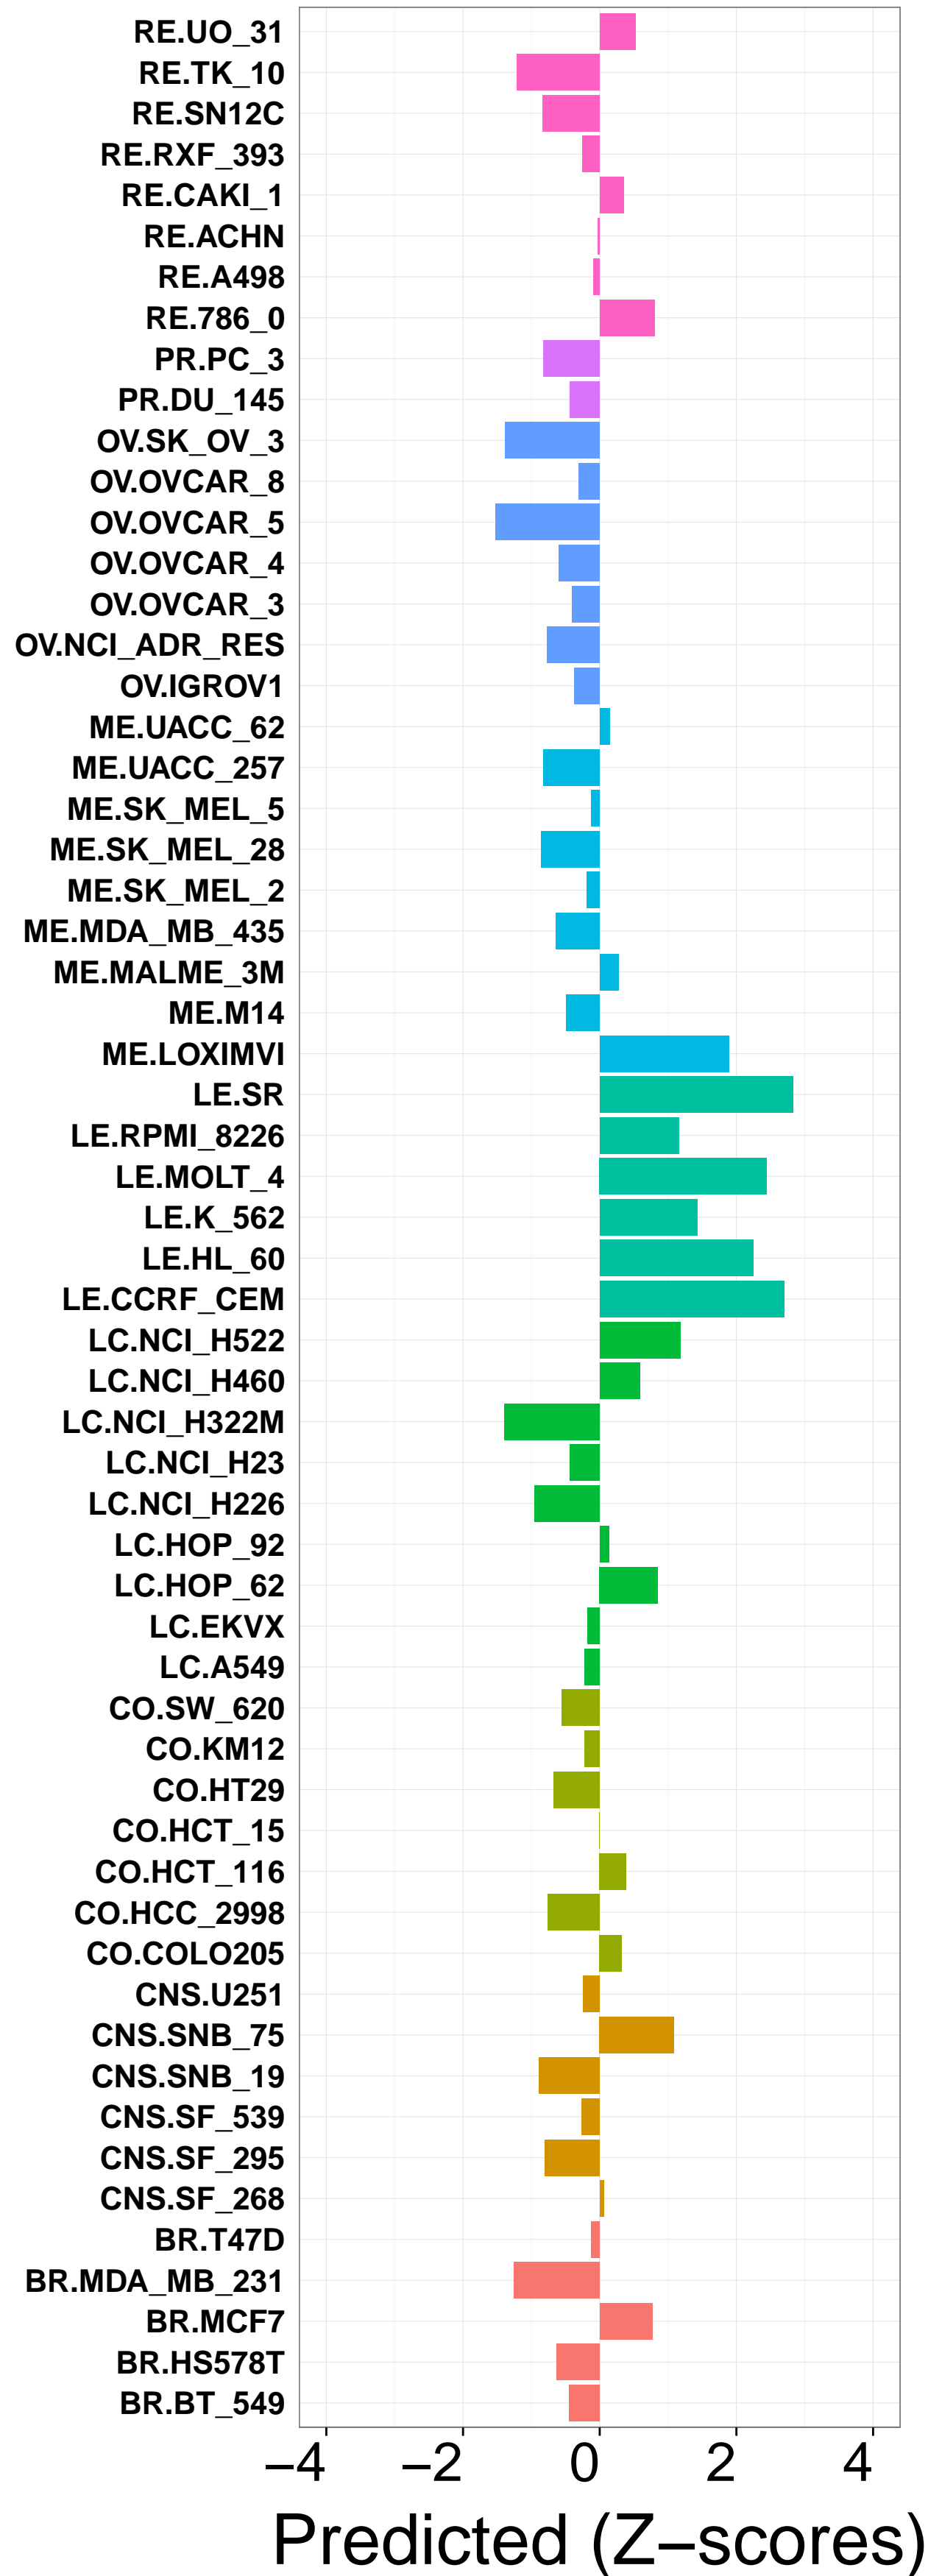

# NSC 301739, (LOCCO)

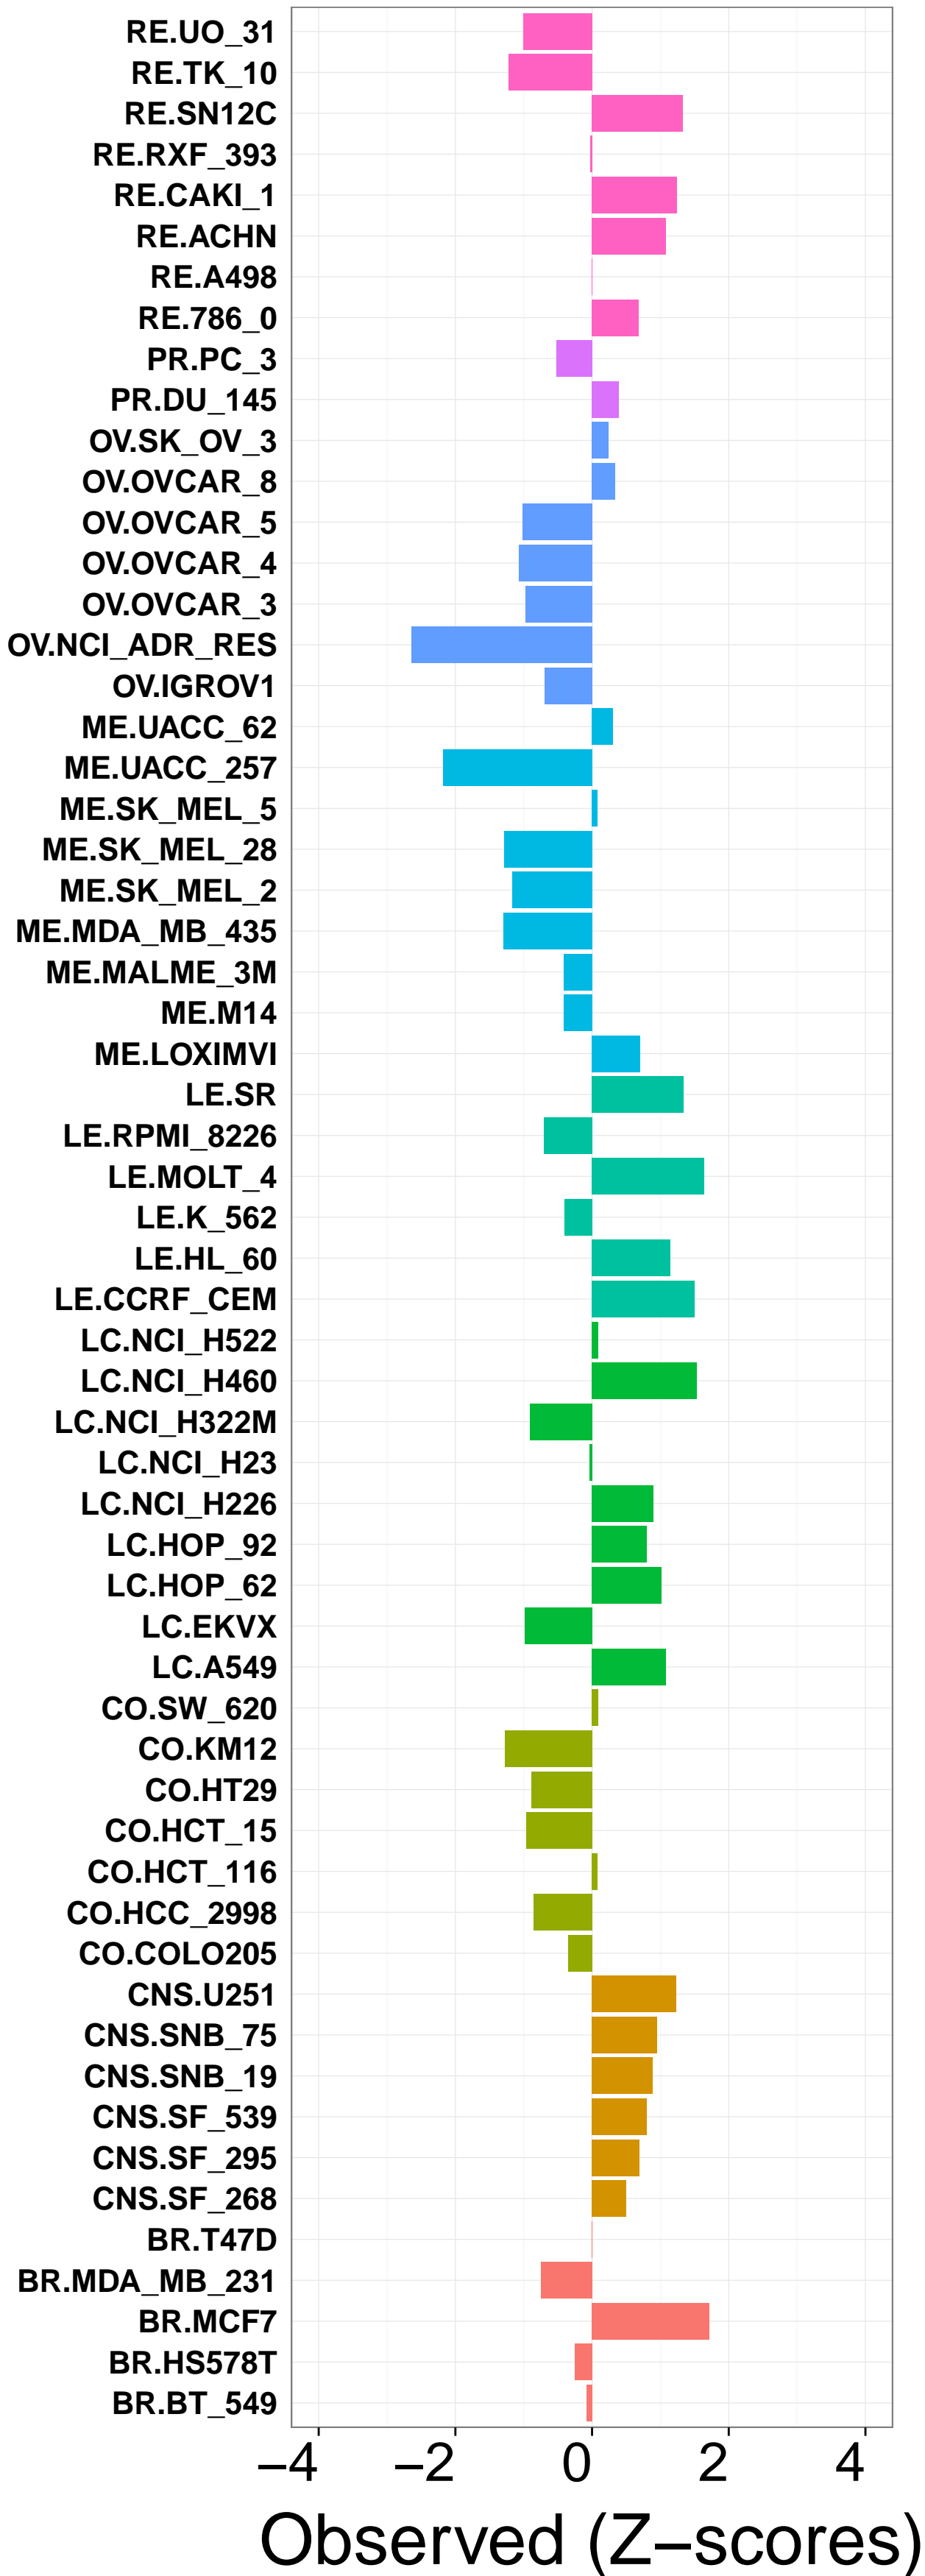

# NSC 312887, Fludarabine\_phosphate\_(USAN) (LOCCO)

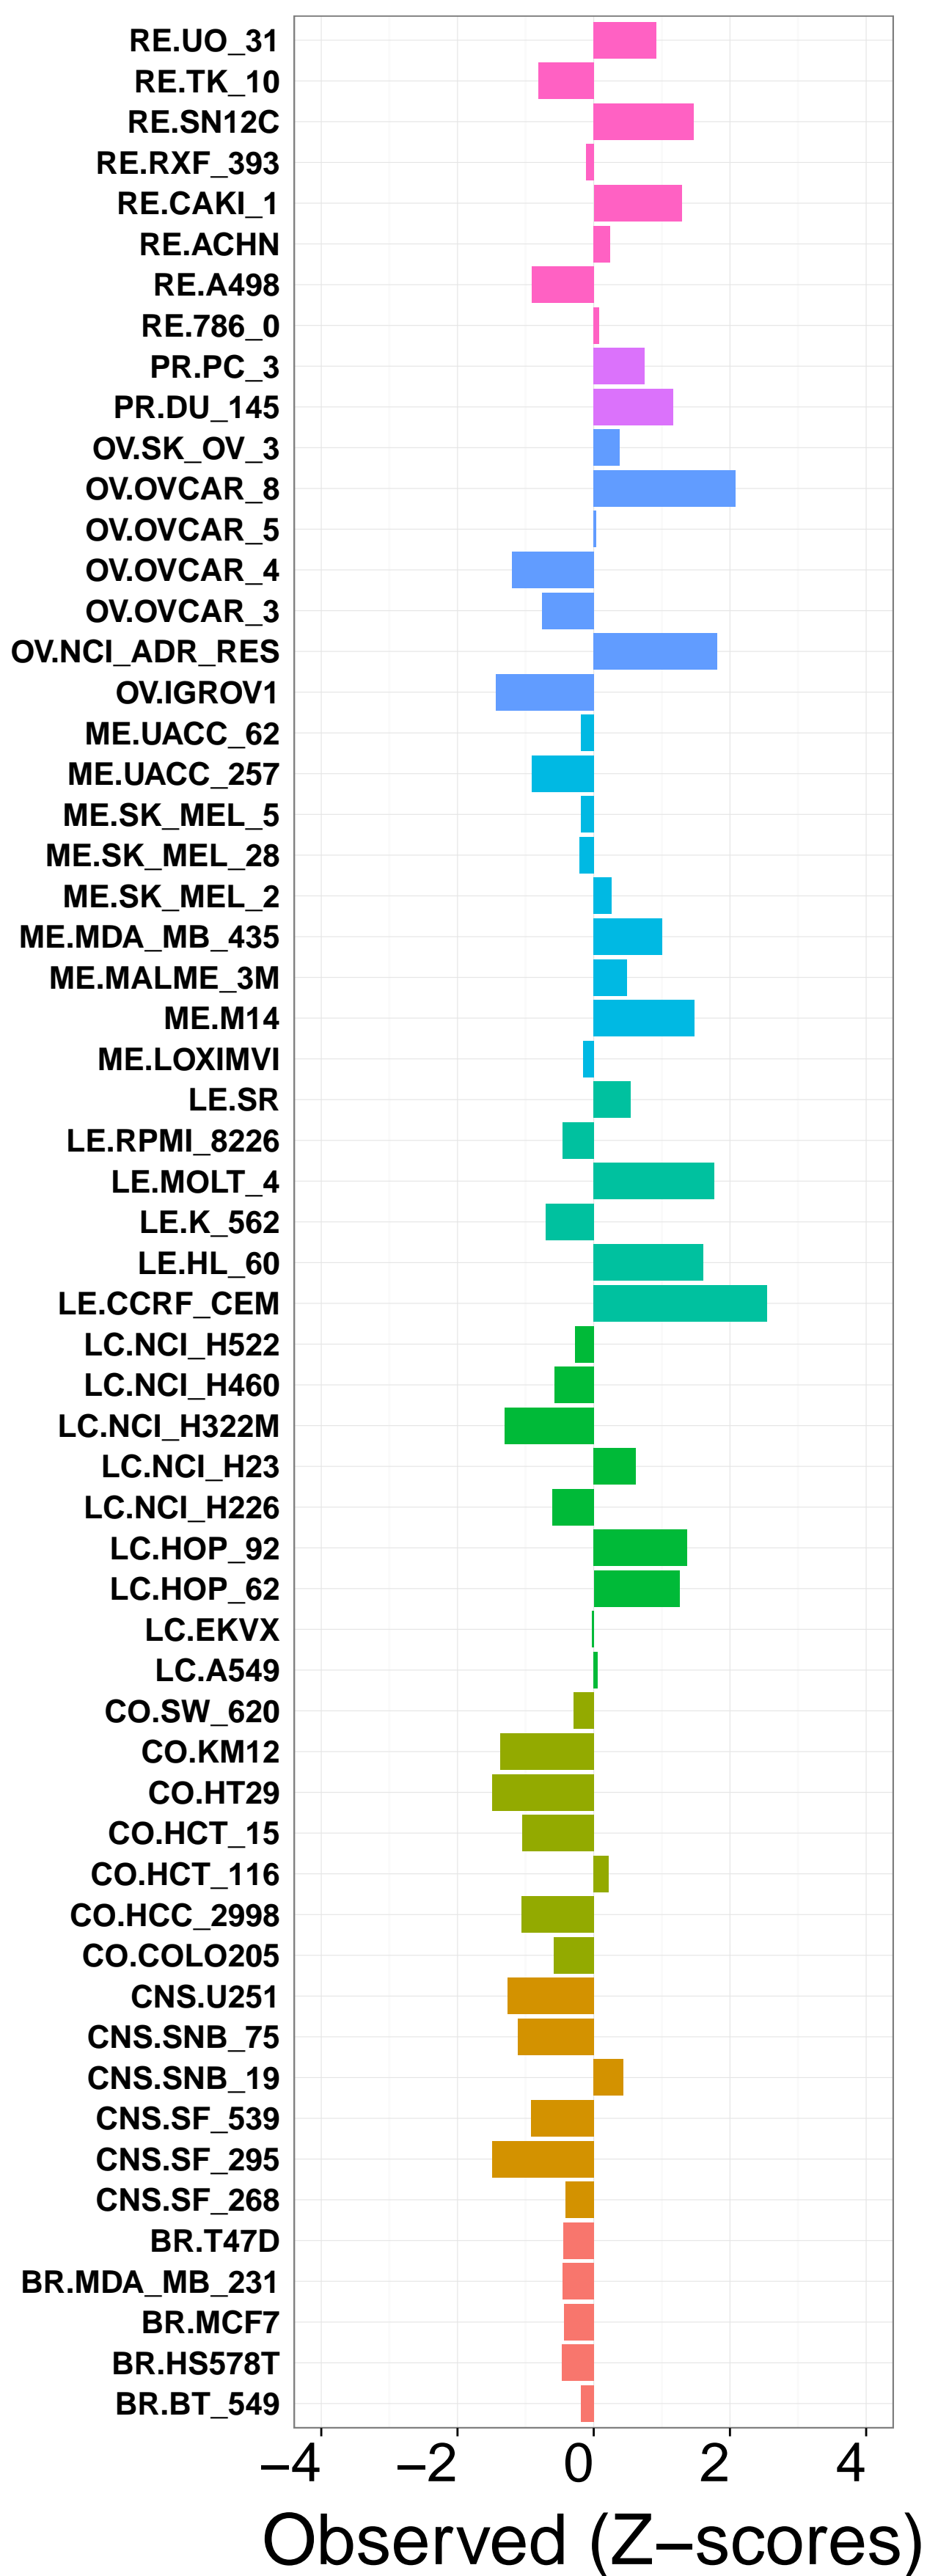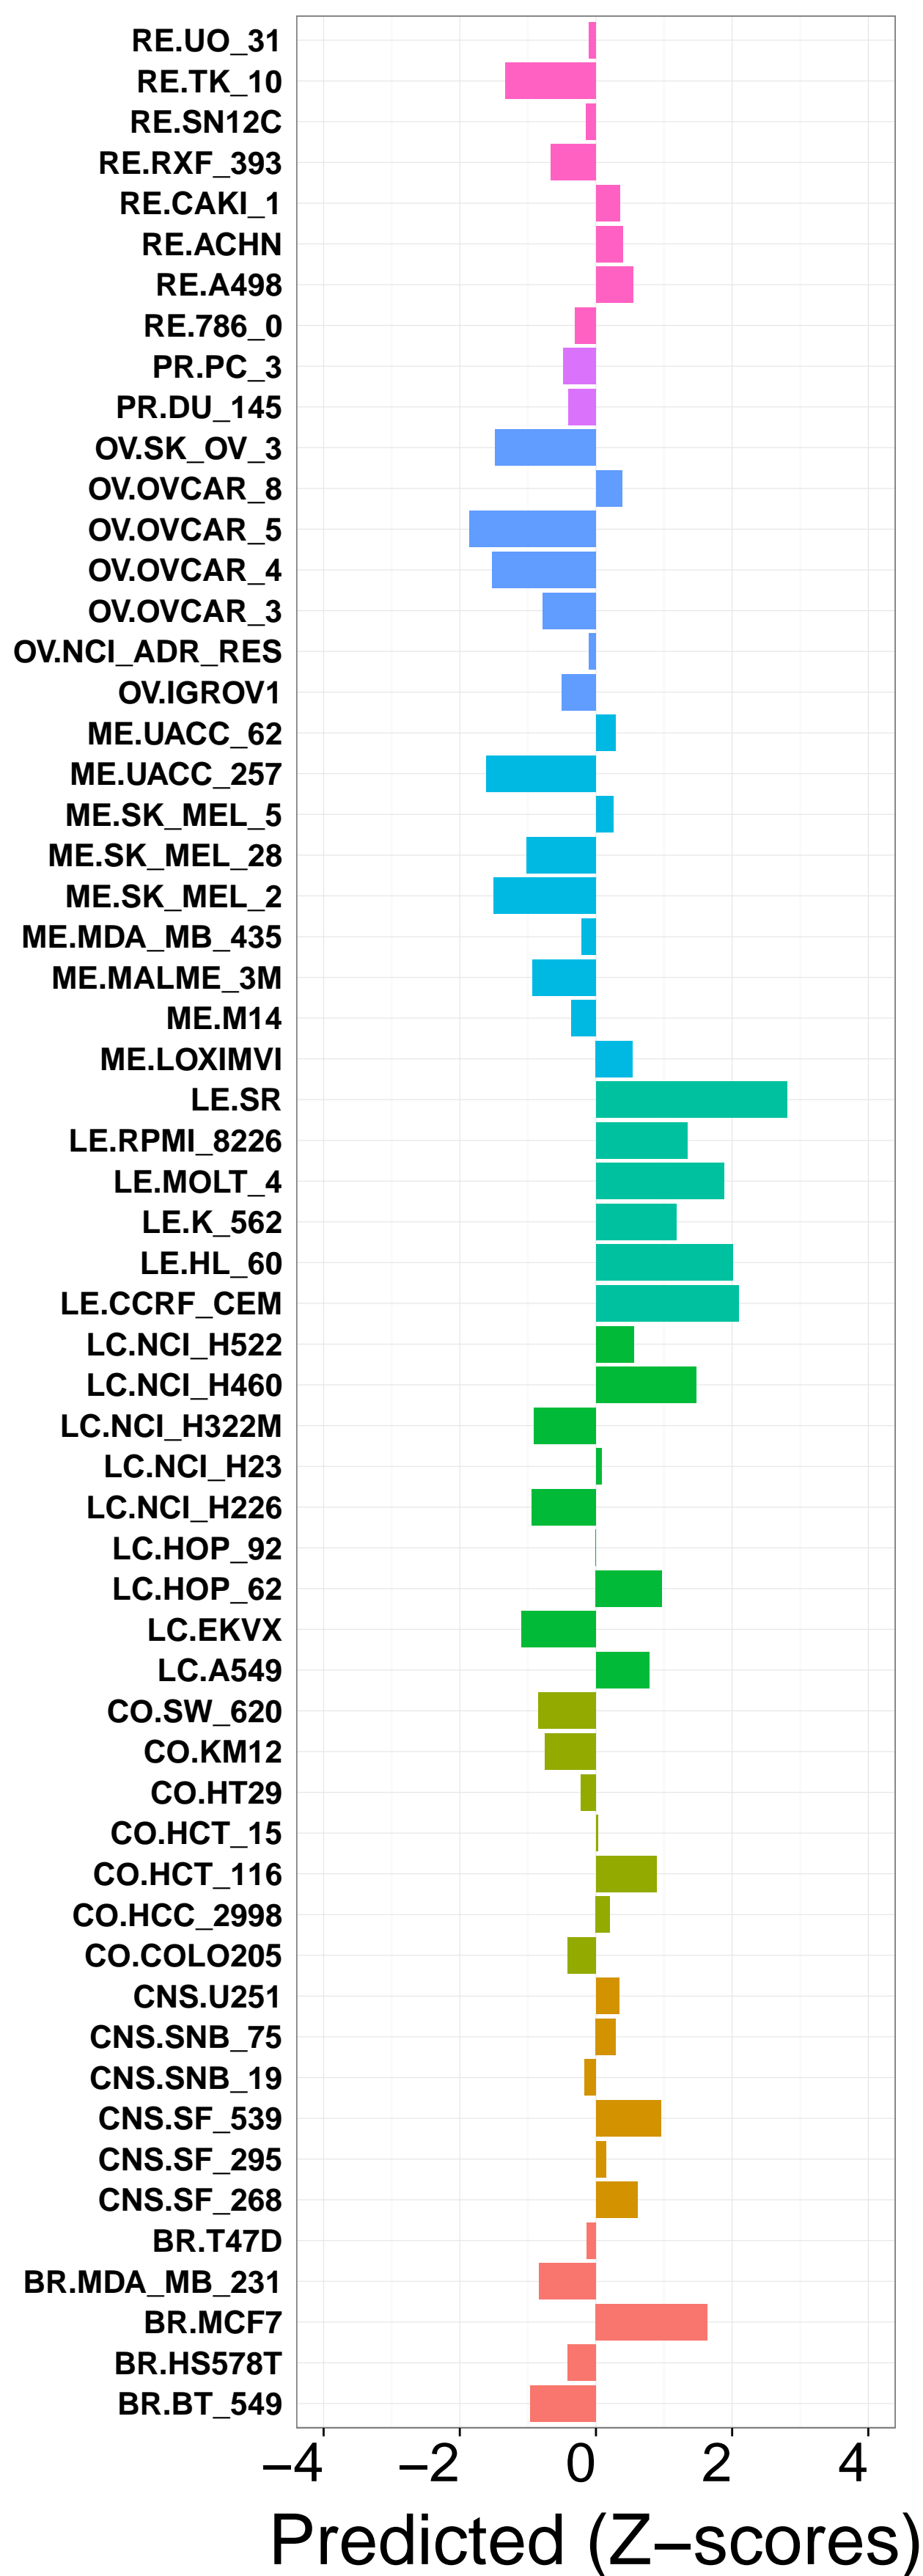



# NSC 330507, Tanespimycin (LOCCO)

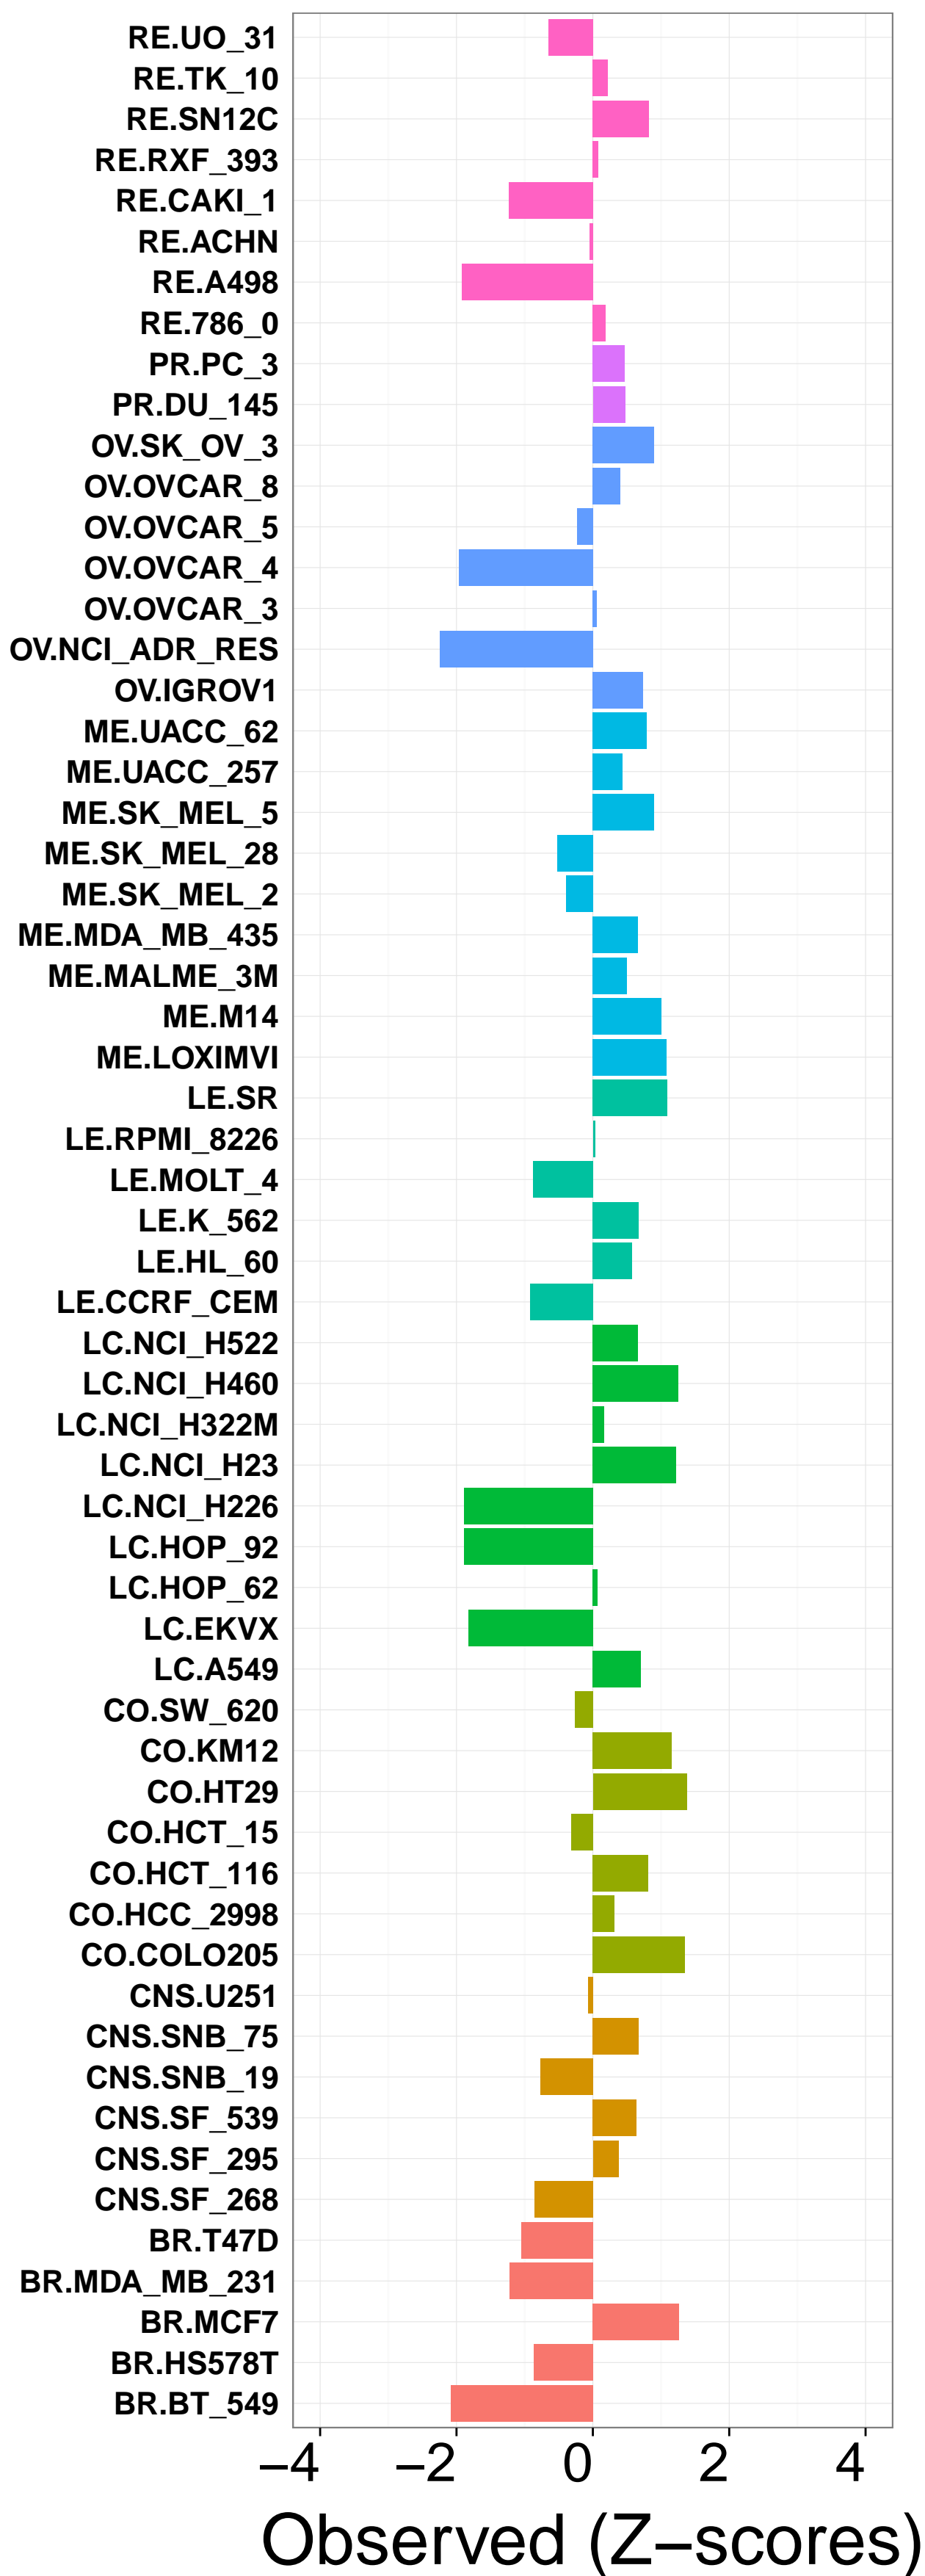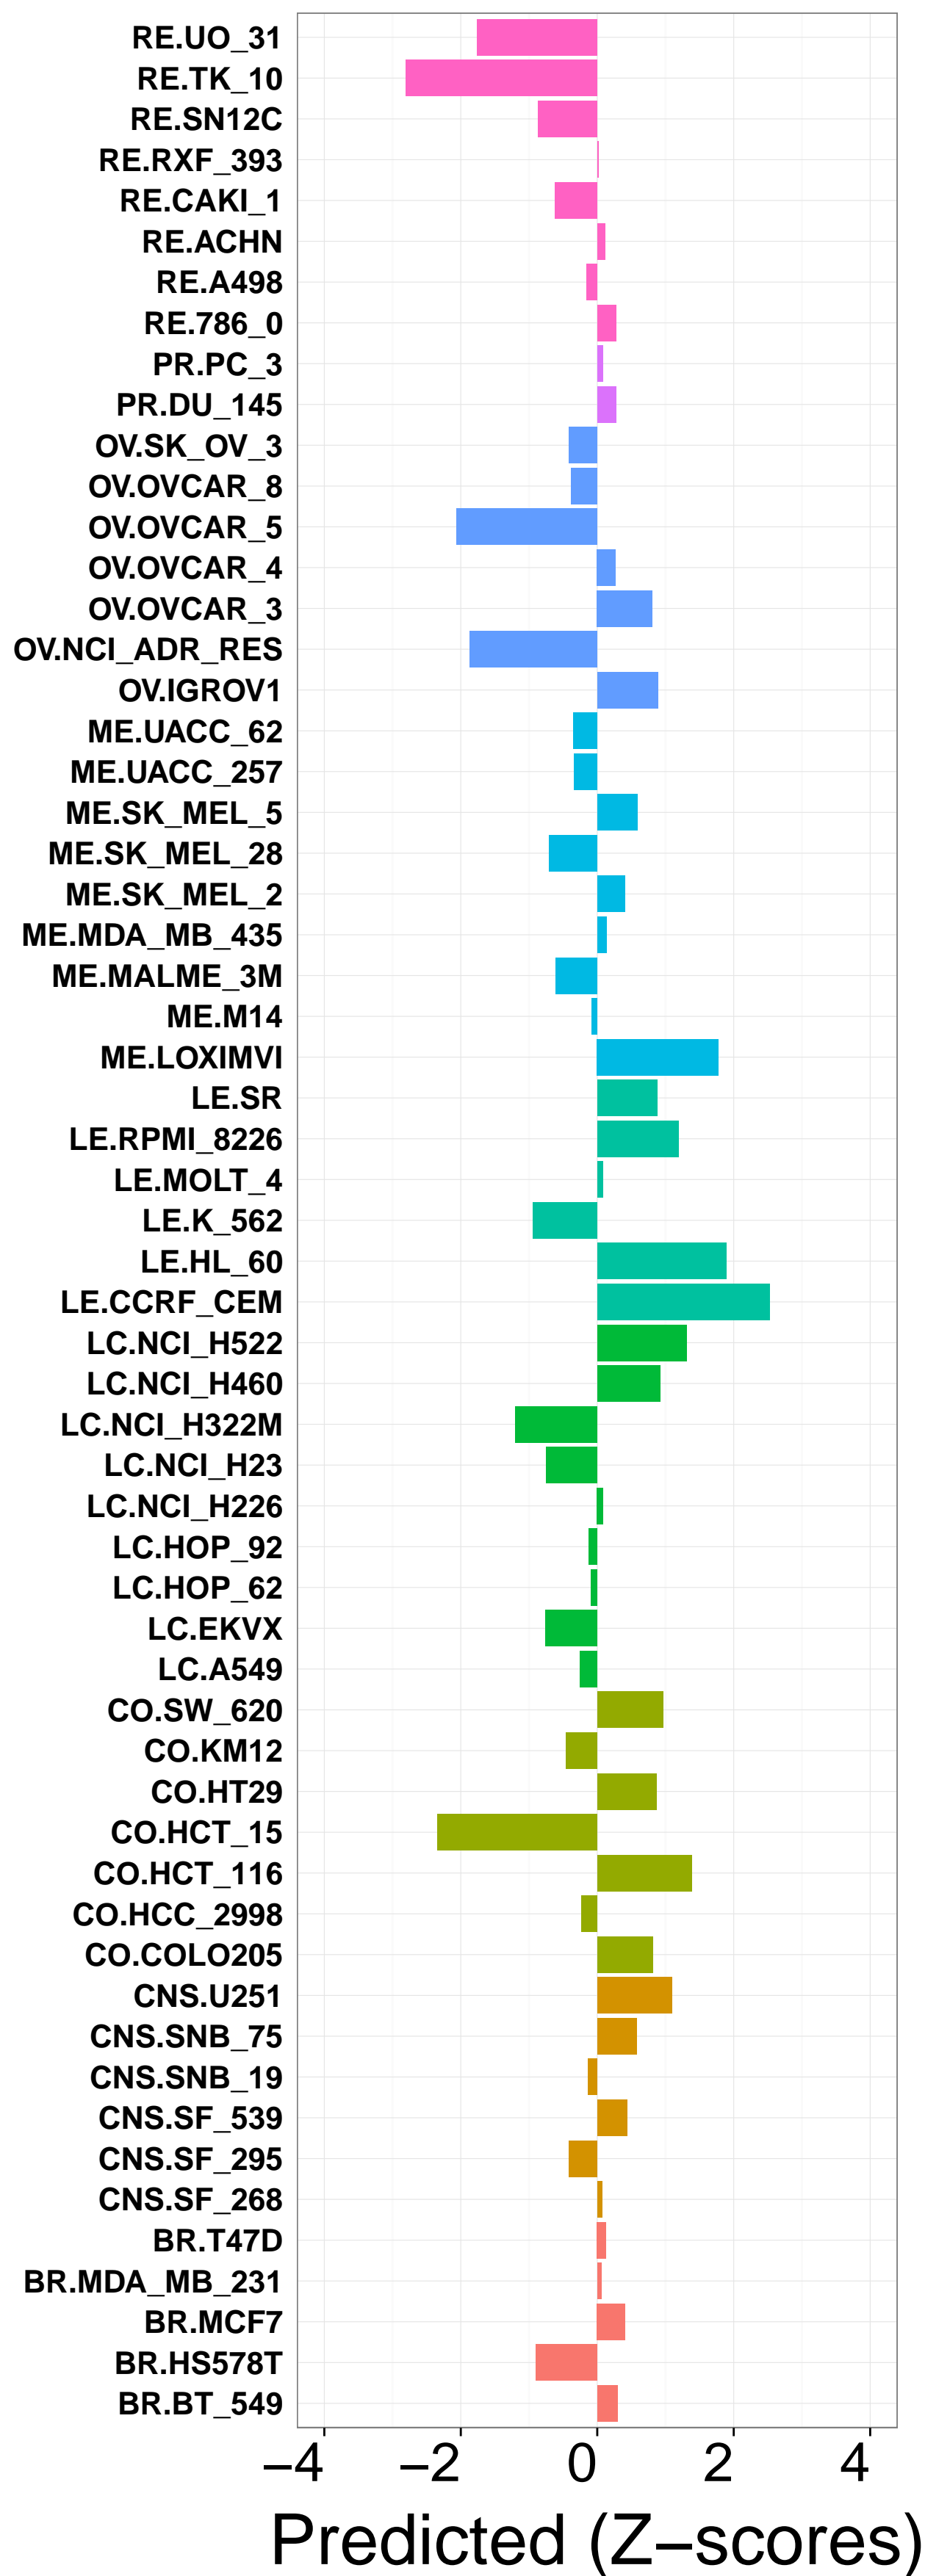

# NSC 34521, Dextromethorphan\_Hydrobromide (LOCCO)

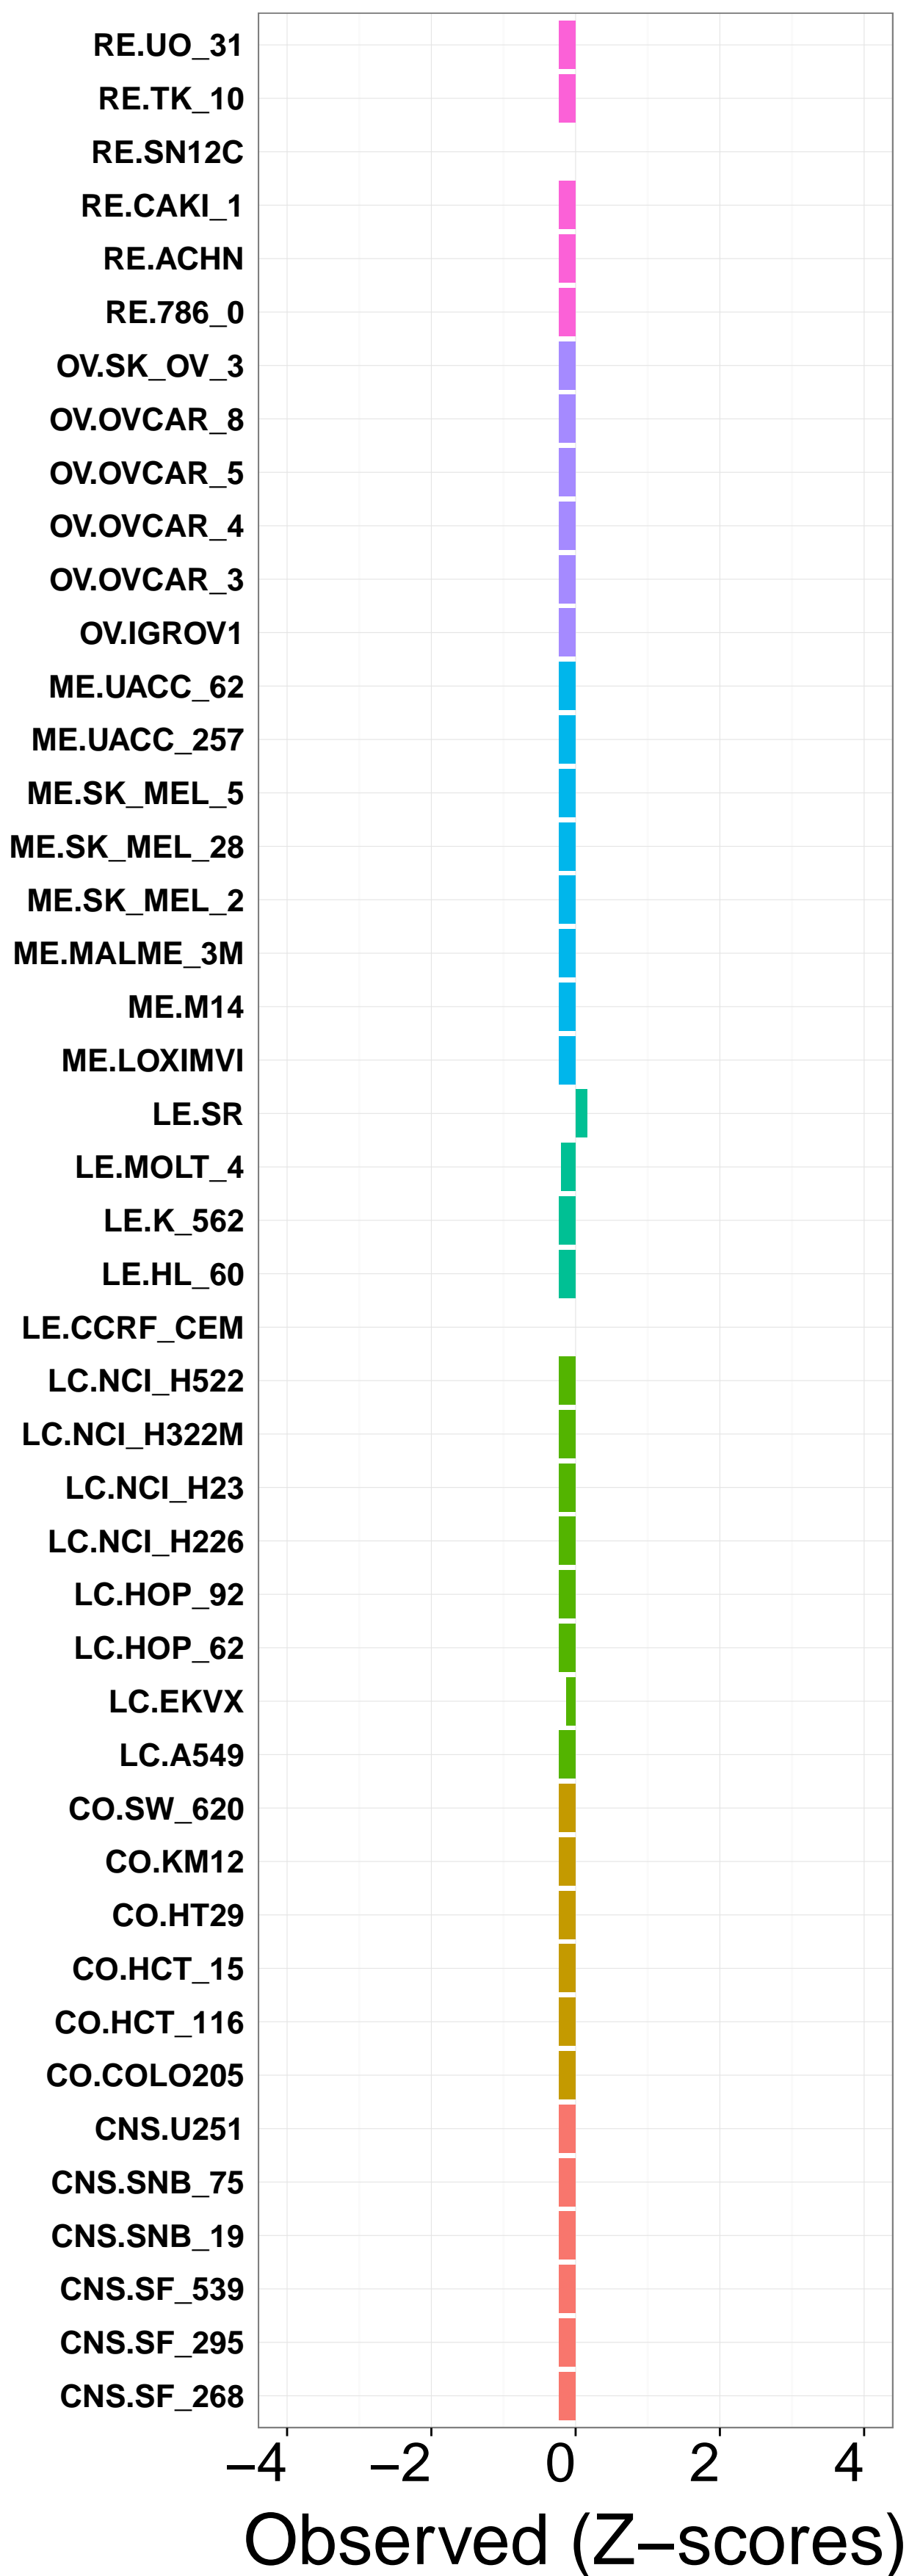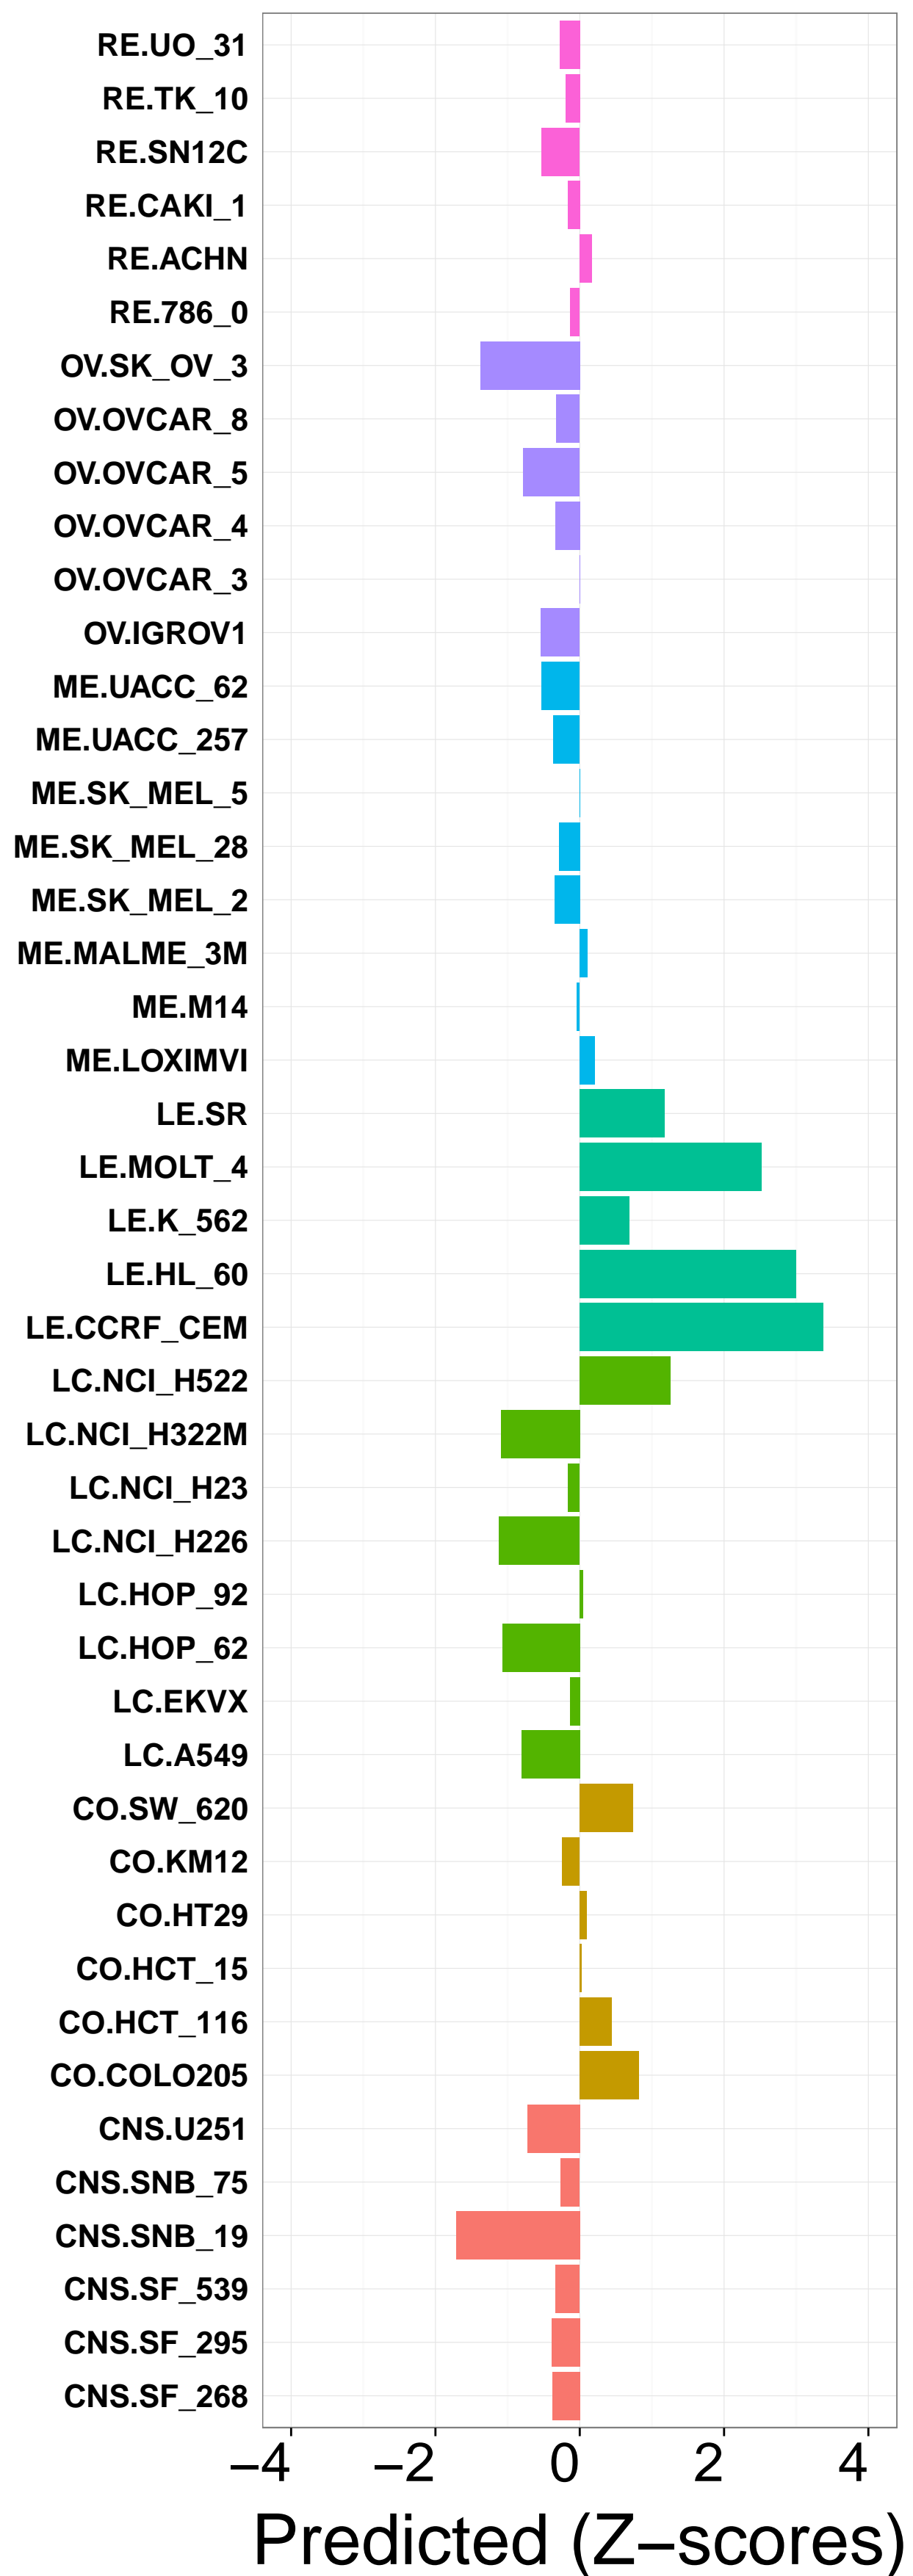

# NSC 354258, 8-Chloro-Adenosine (LOCCO)

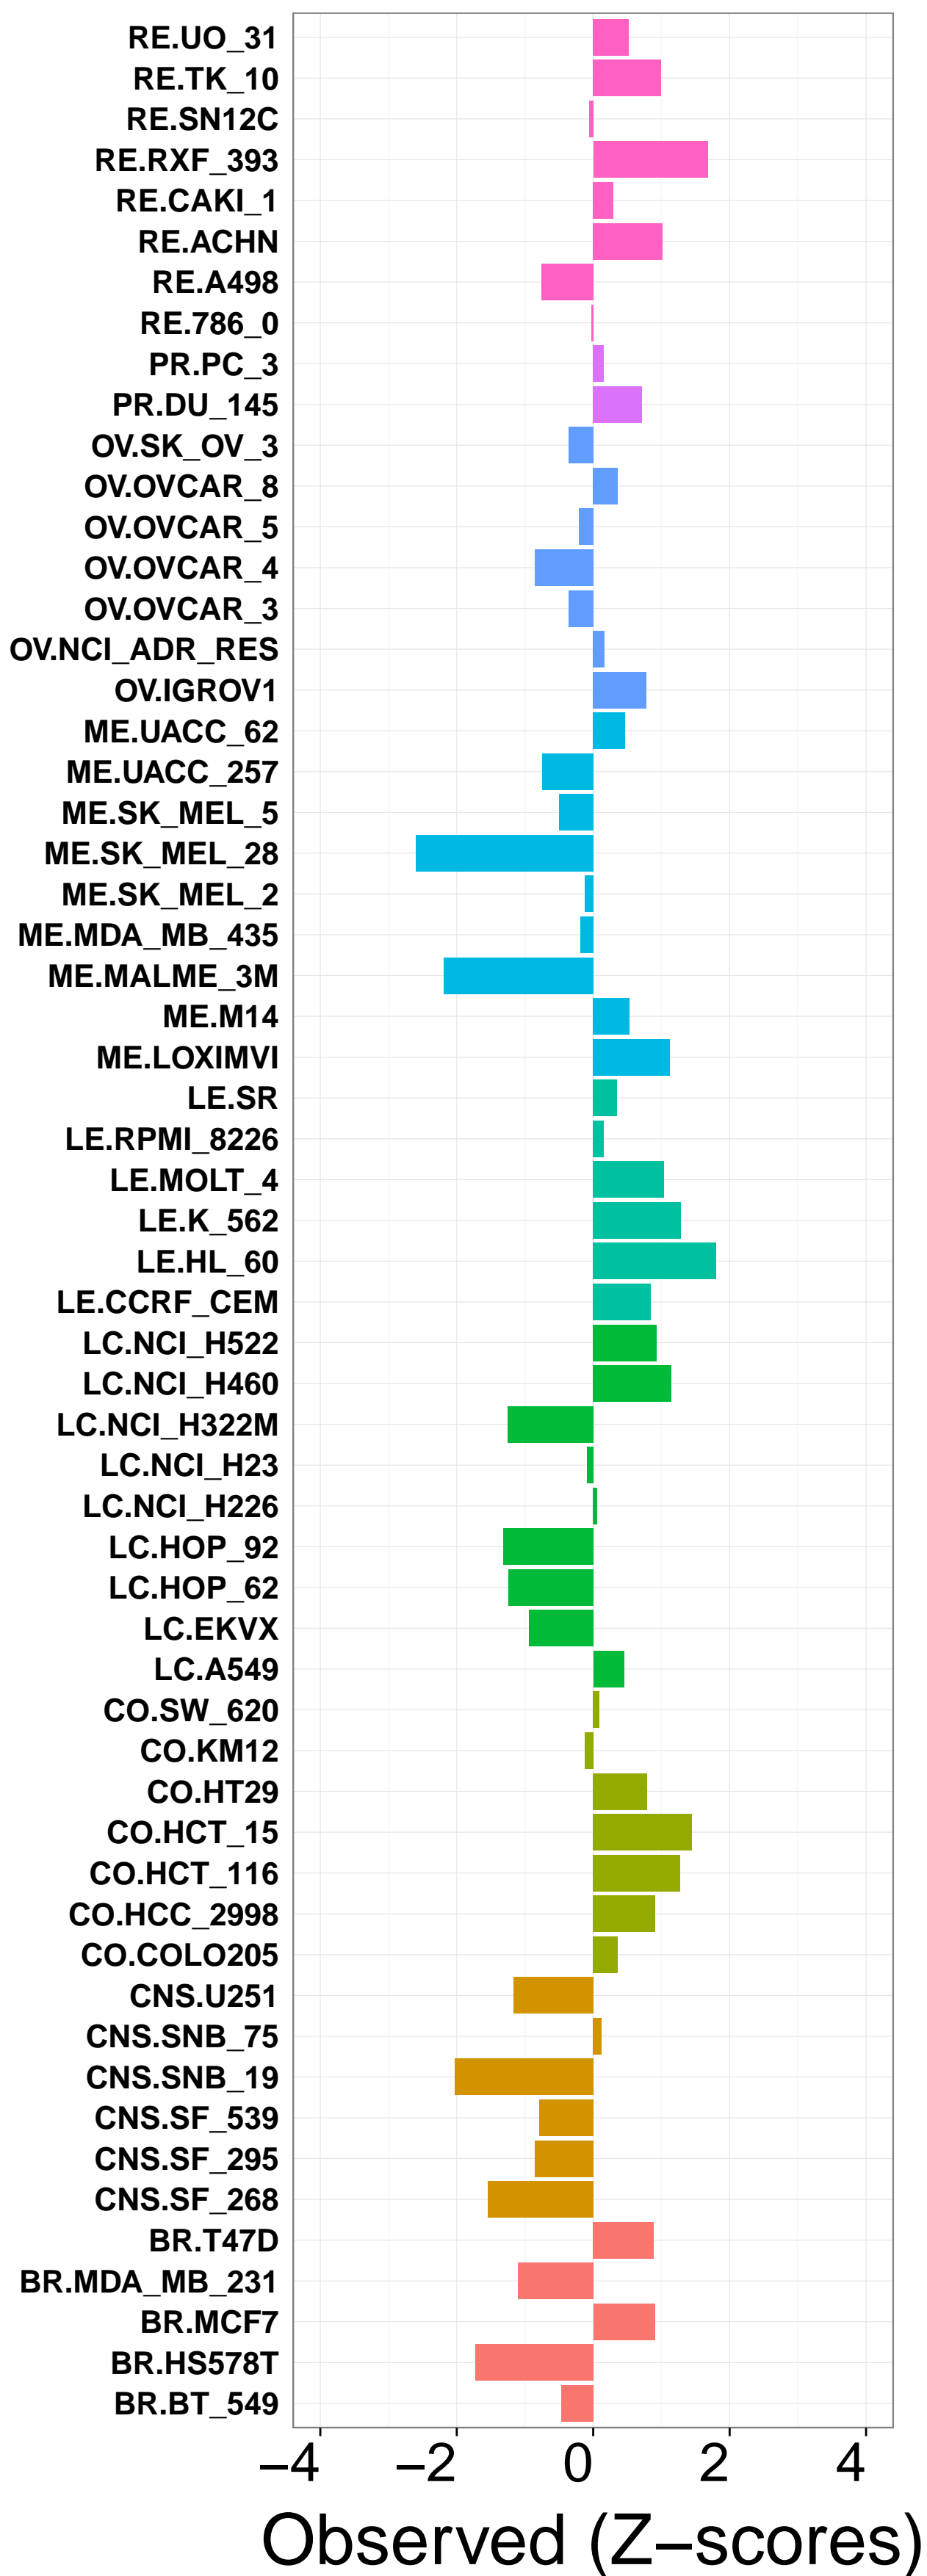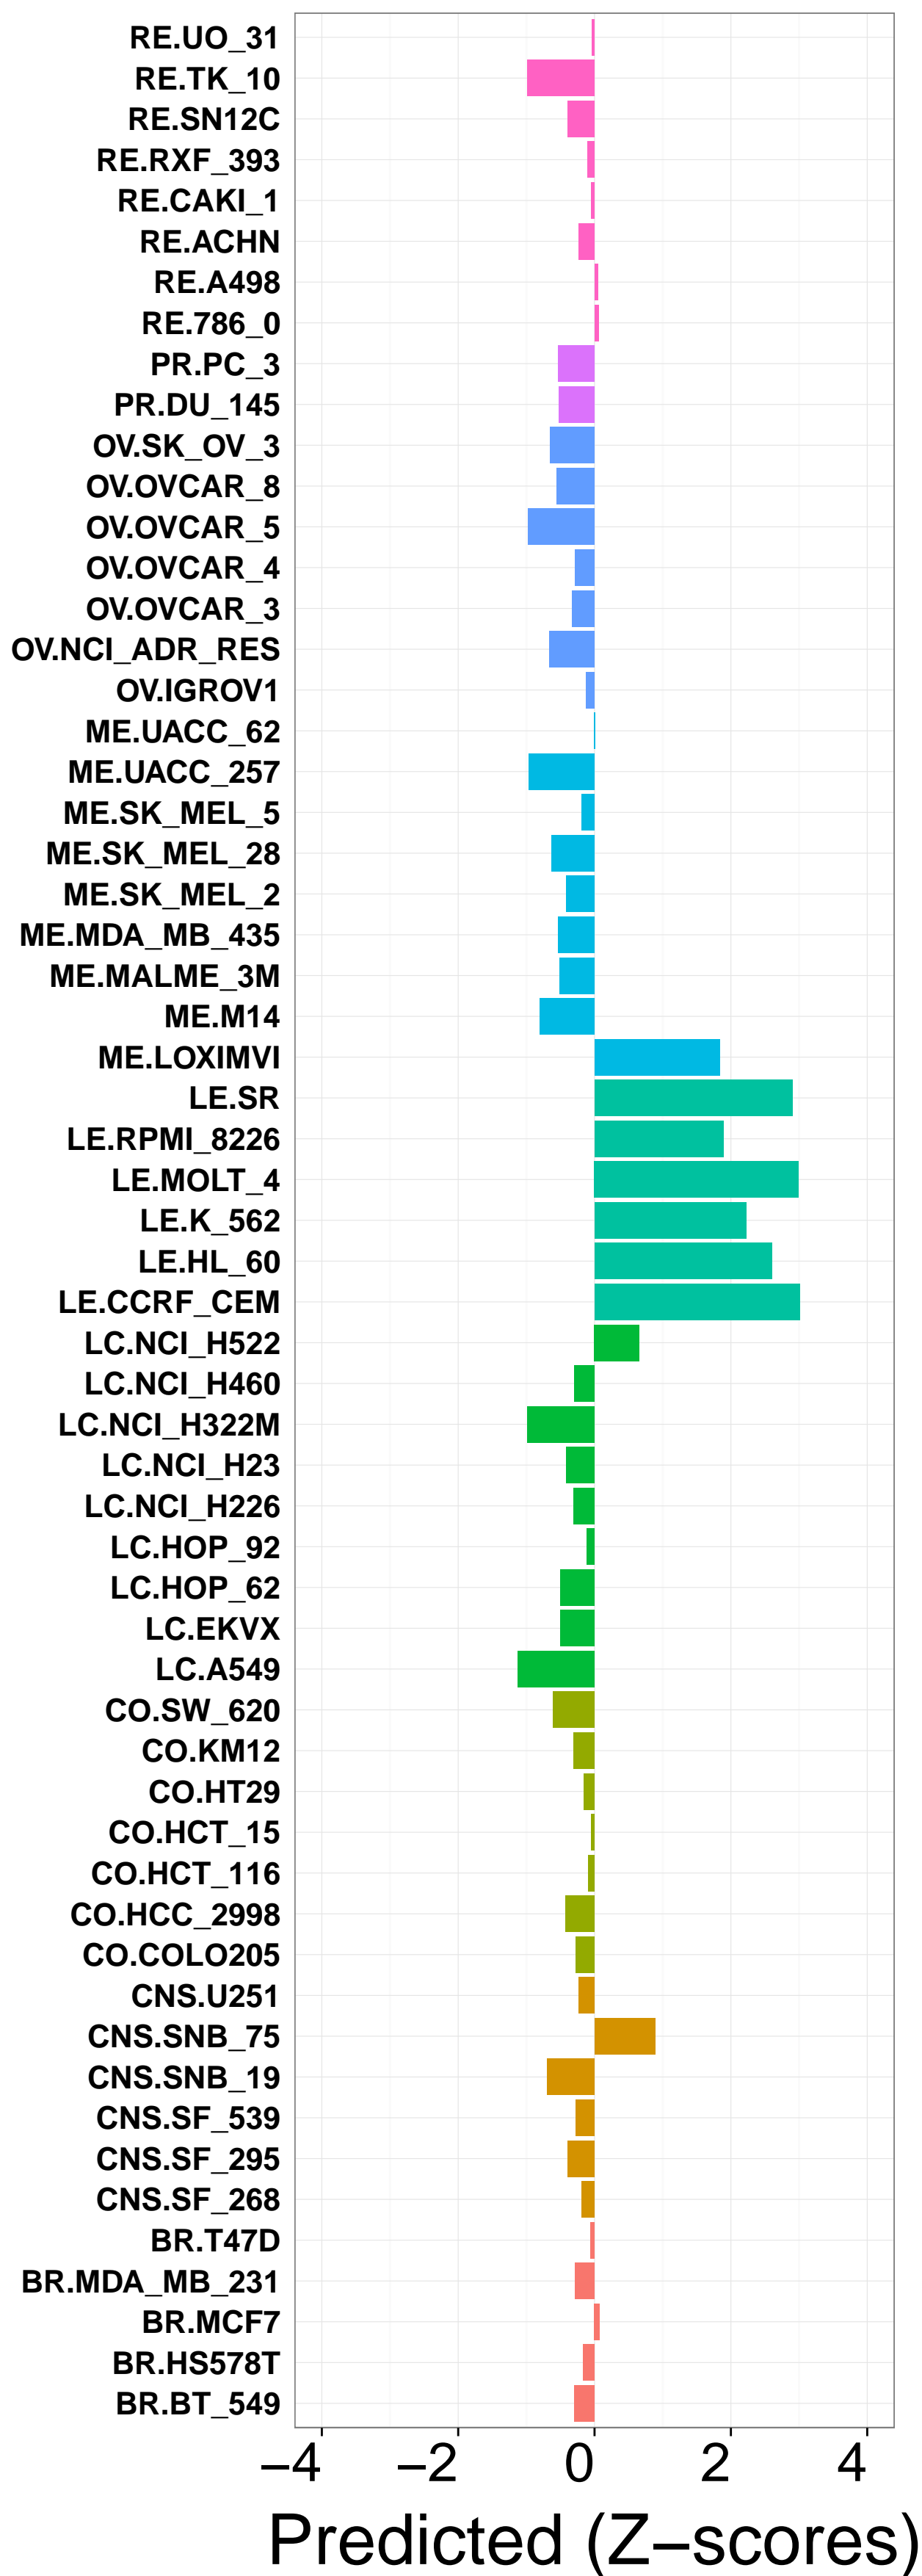

# NSC 354462, Hypothemycin (LOCCO)

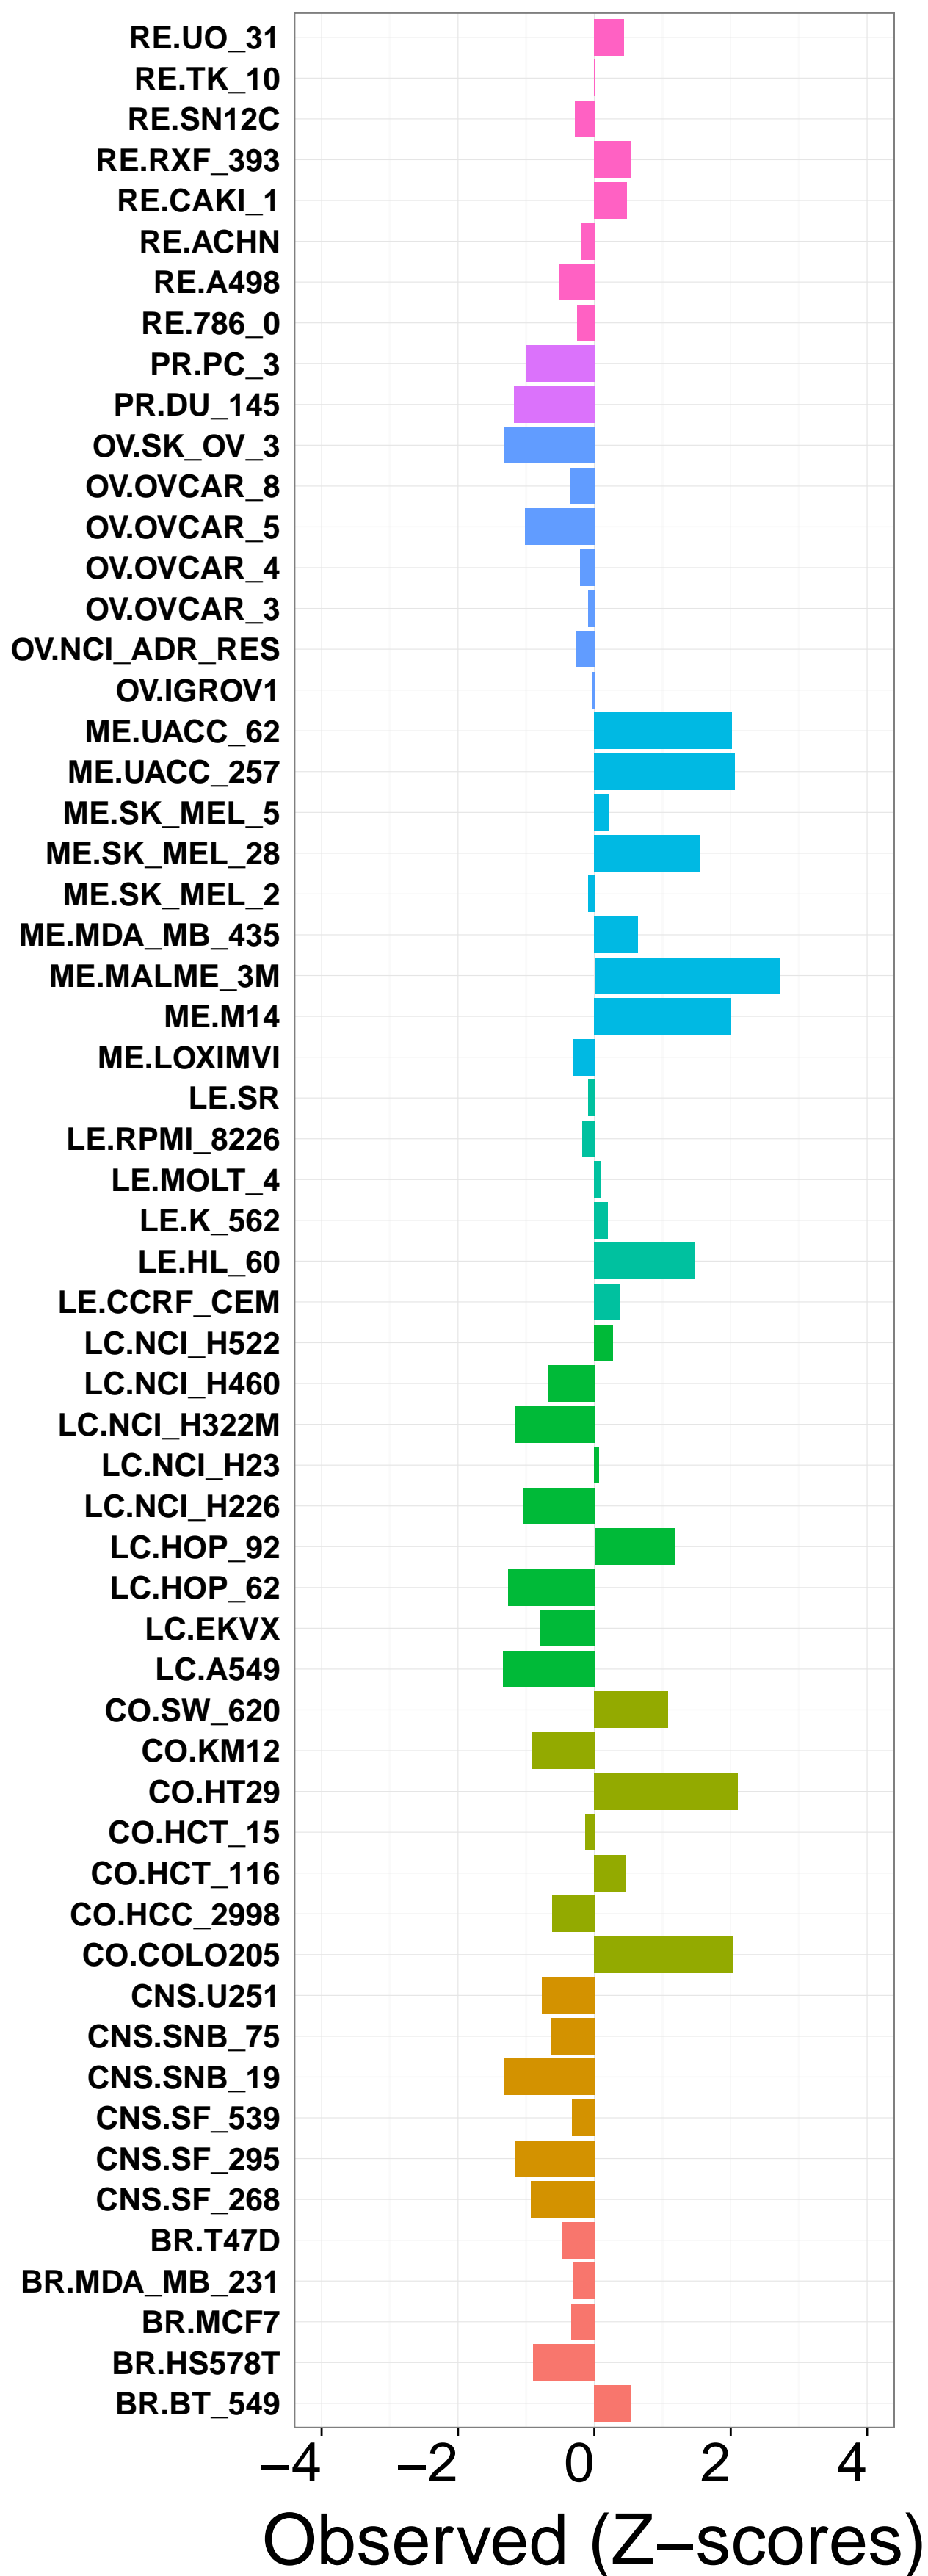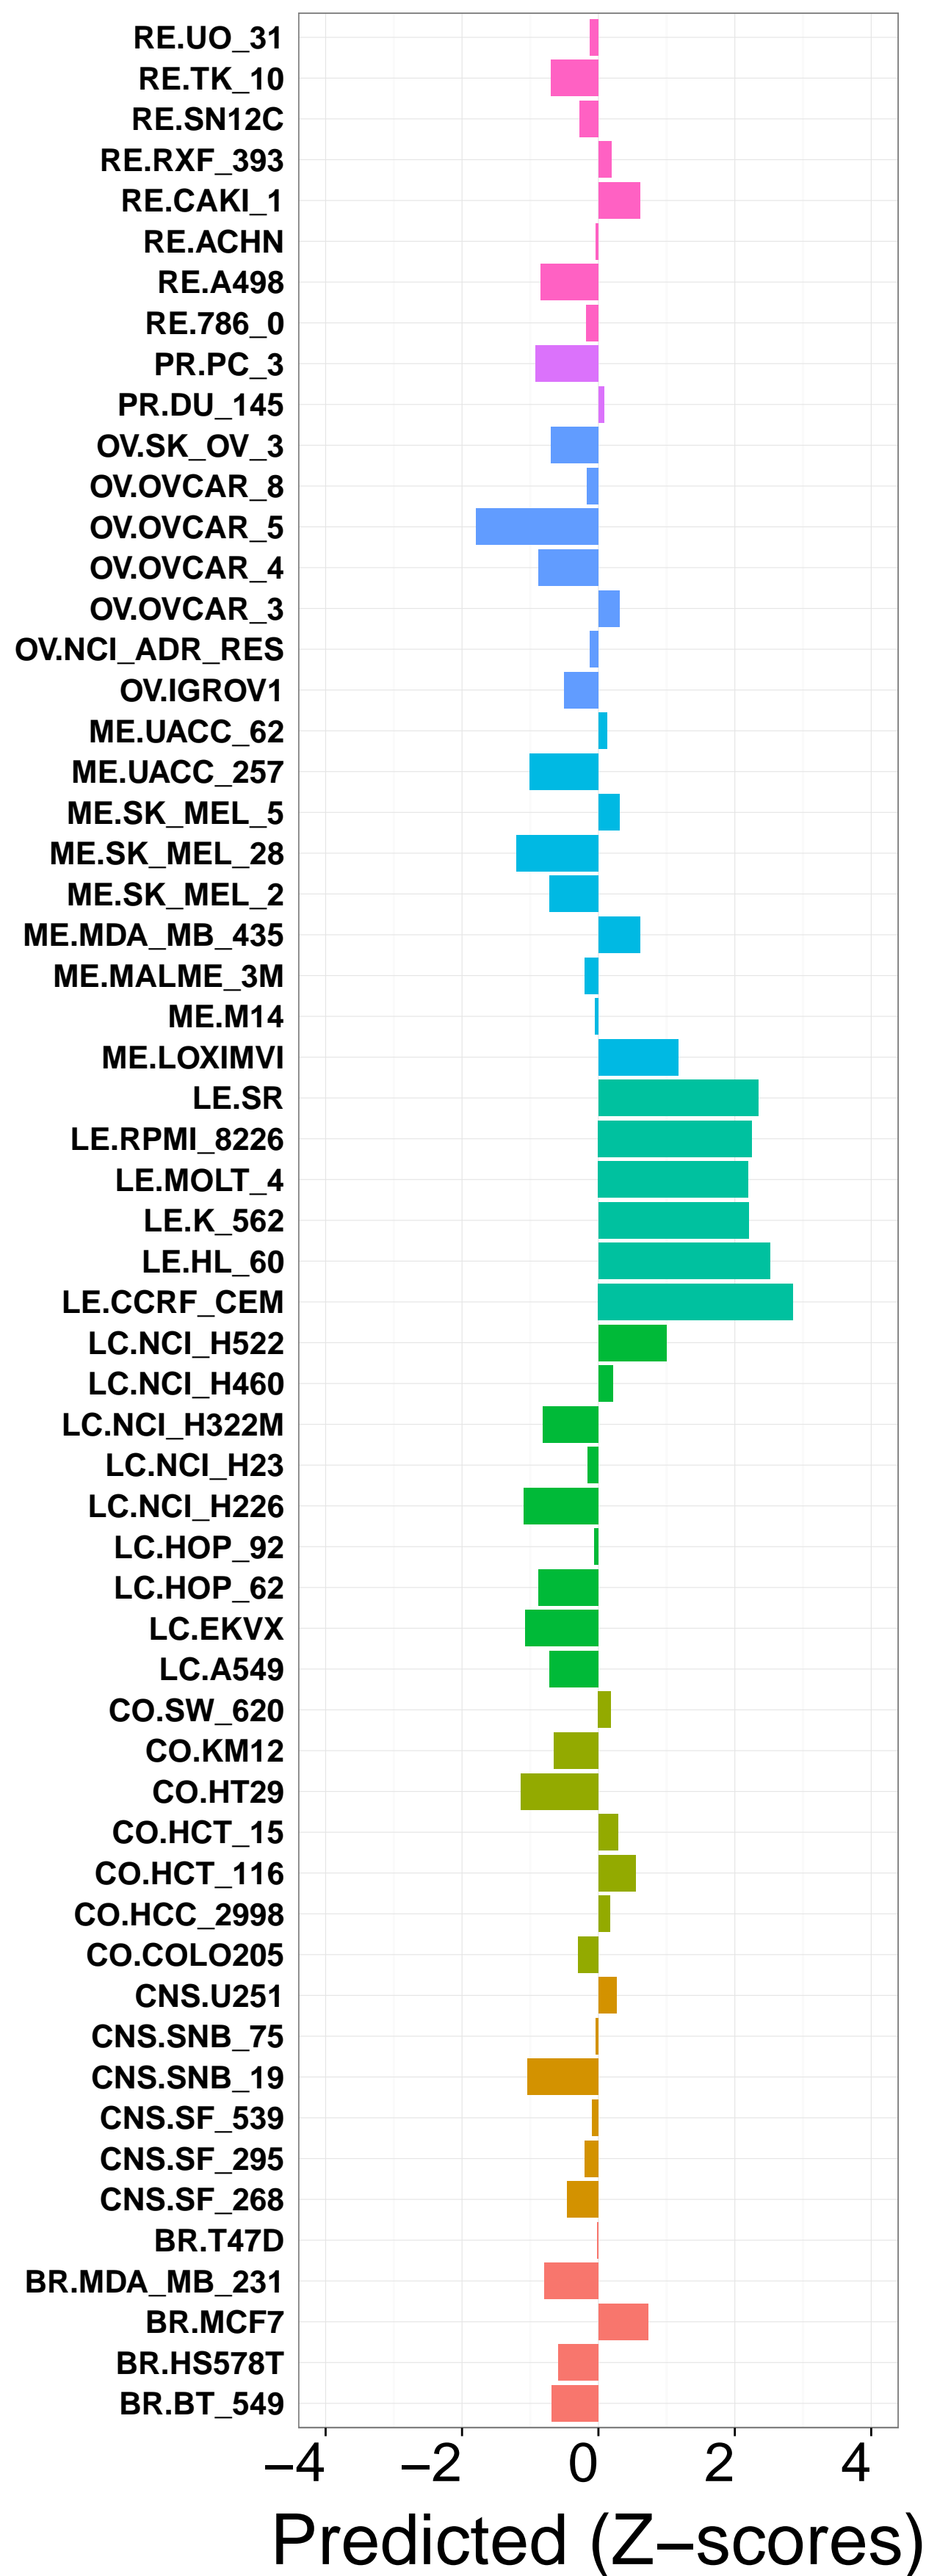

# NSC 376128, Dolastatin\_10 (LOCCO)

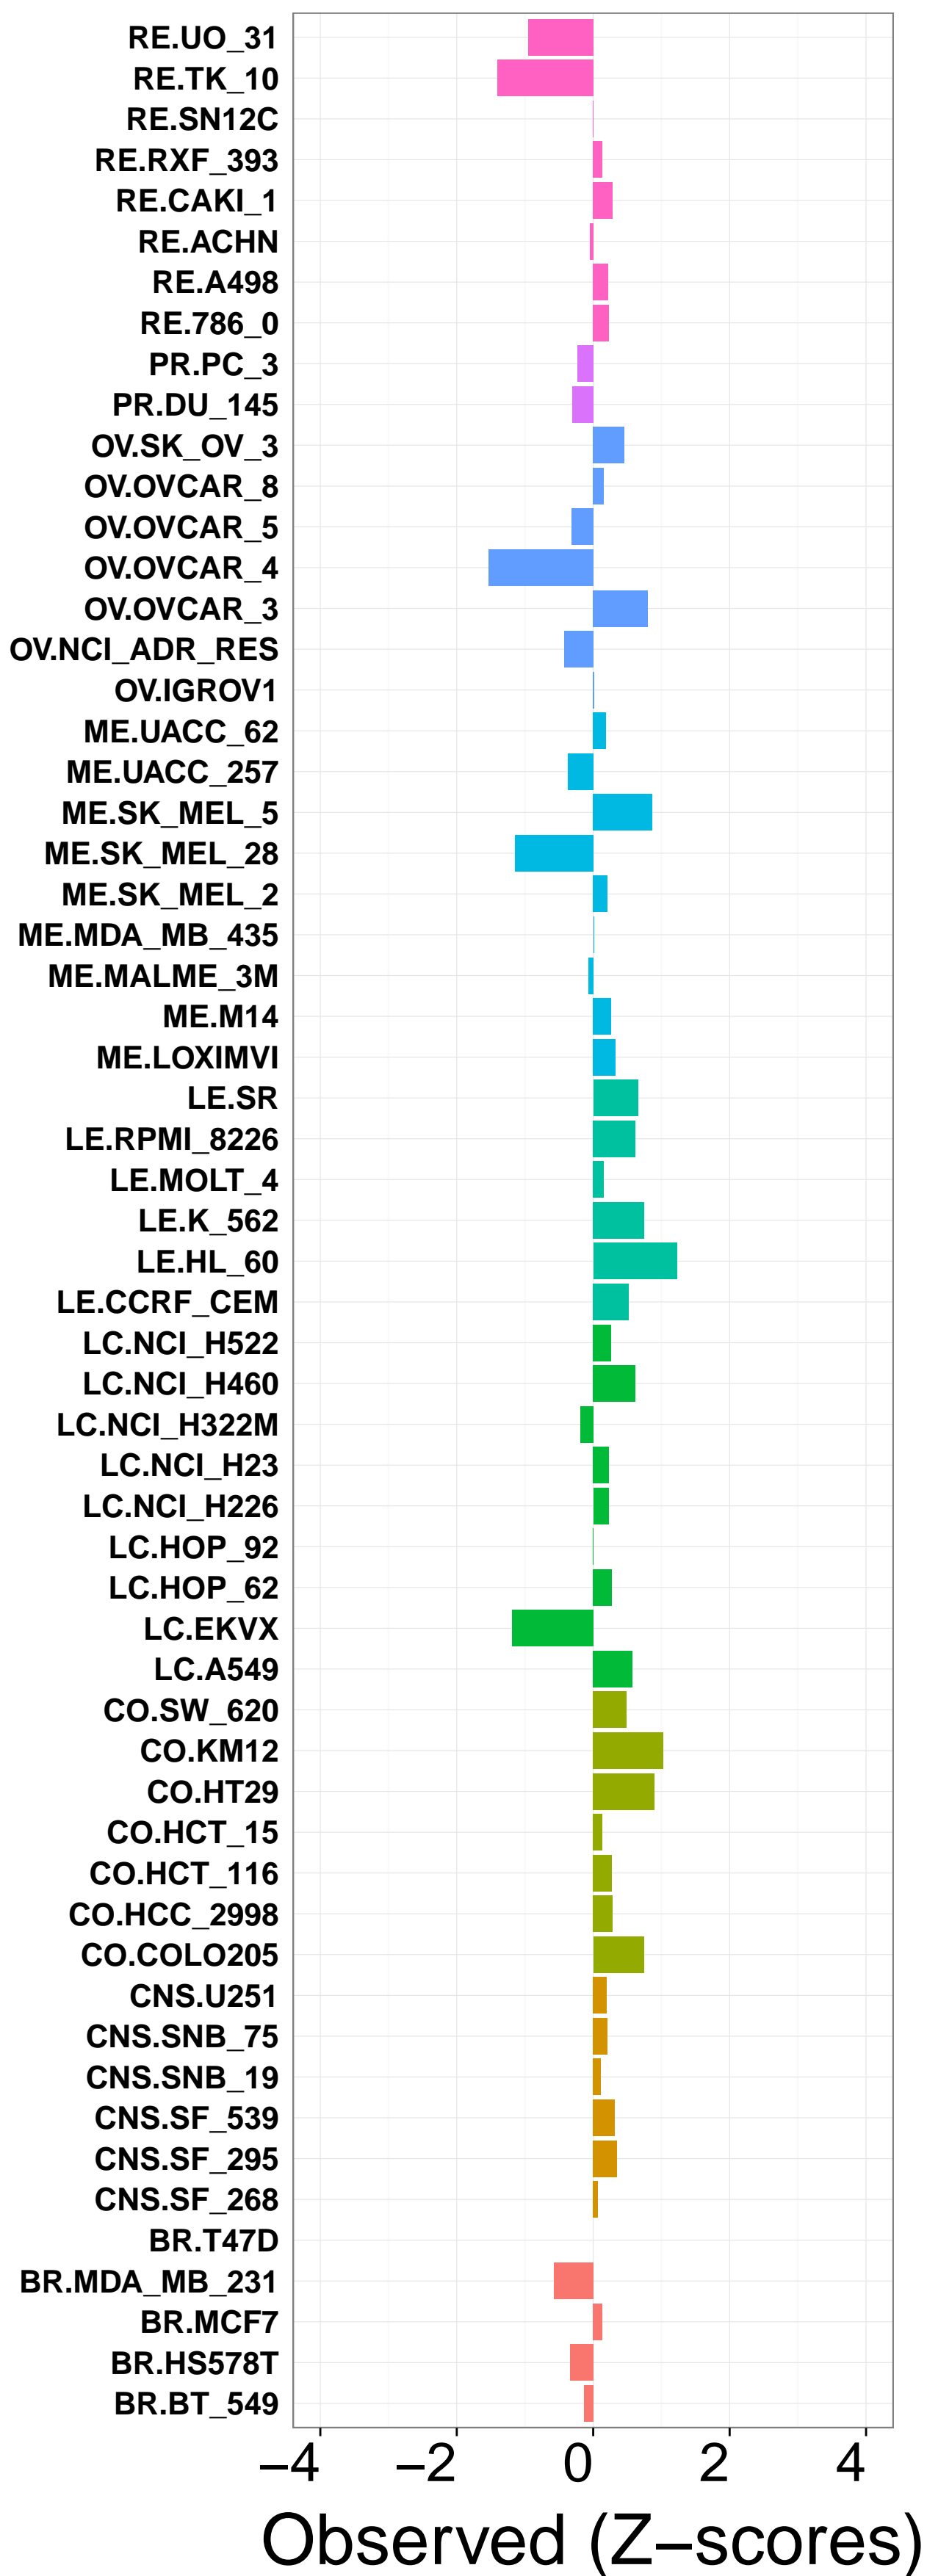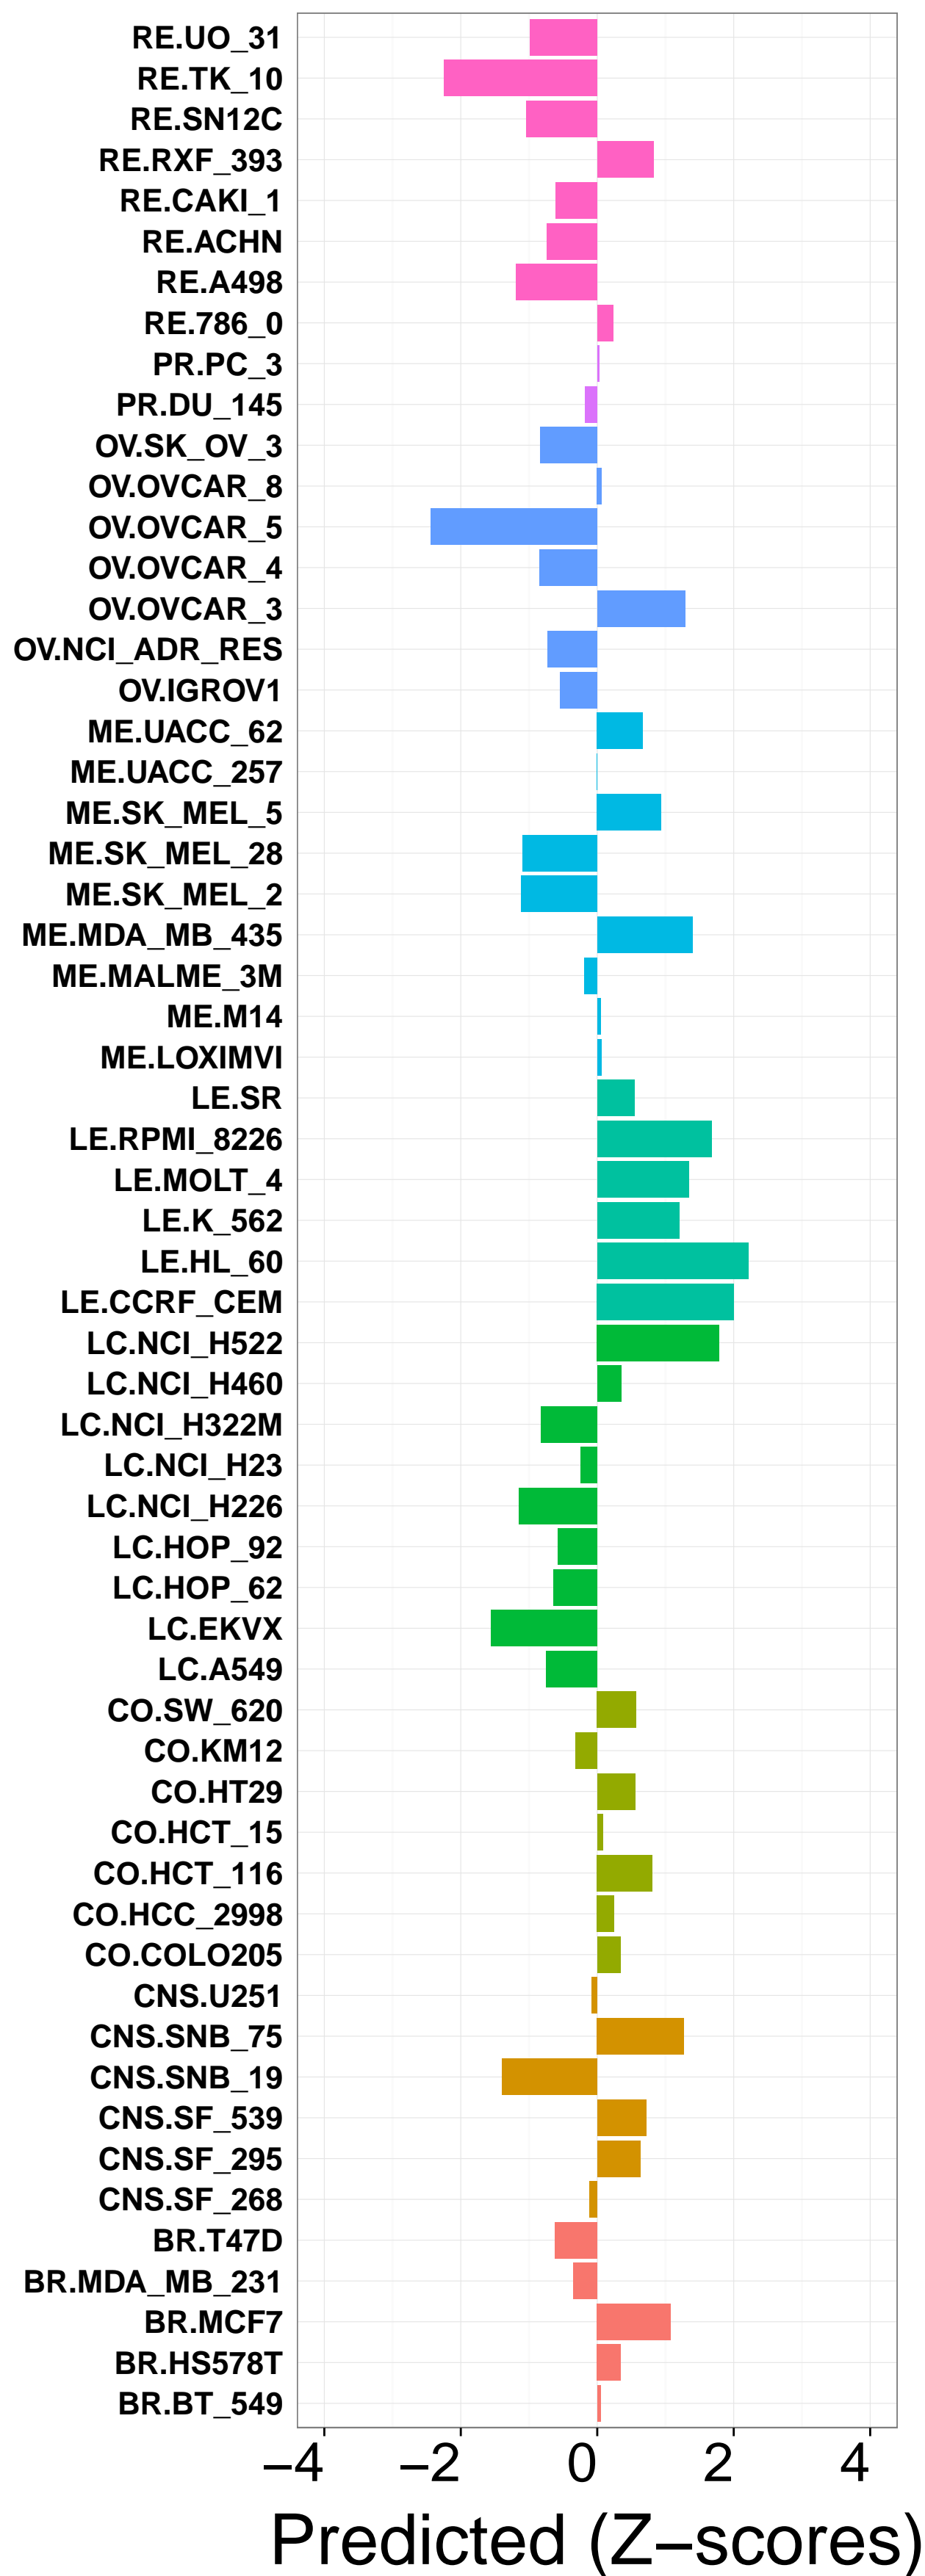



# NSC 606869, (LOCCO)

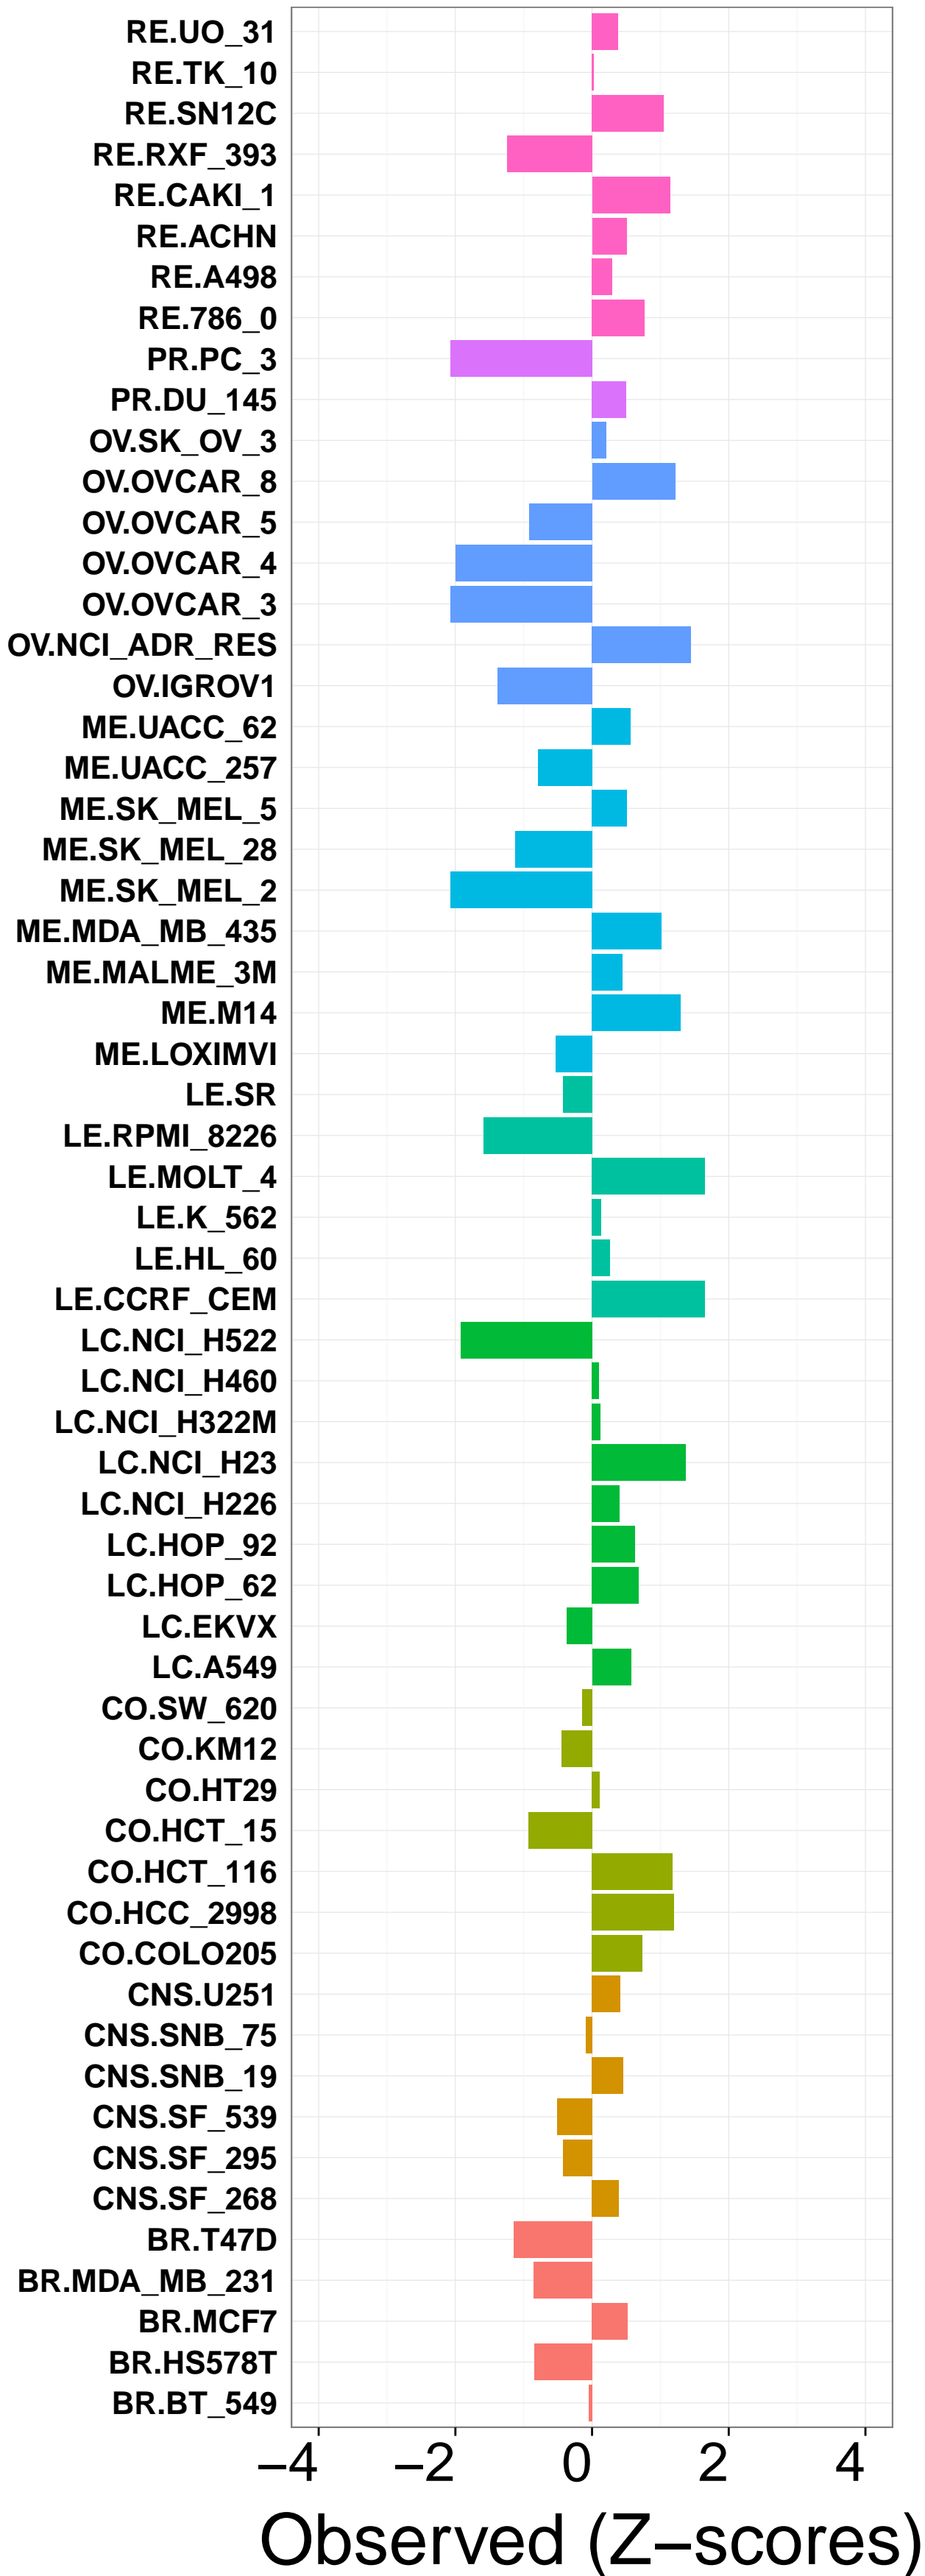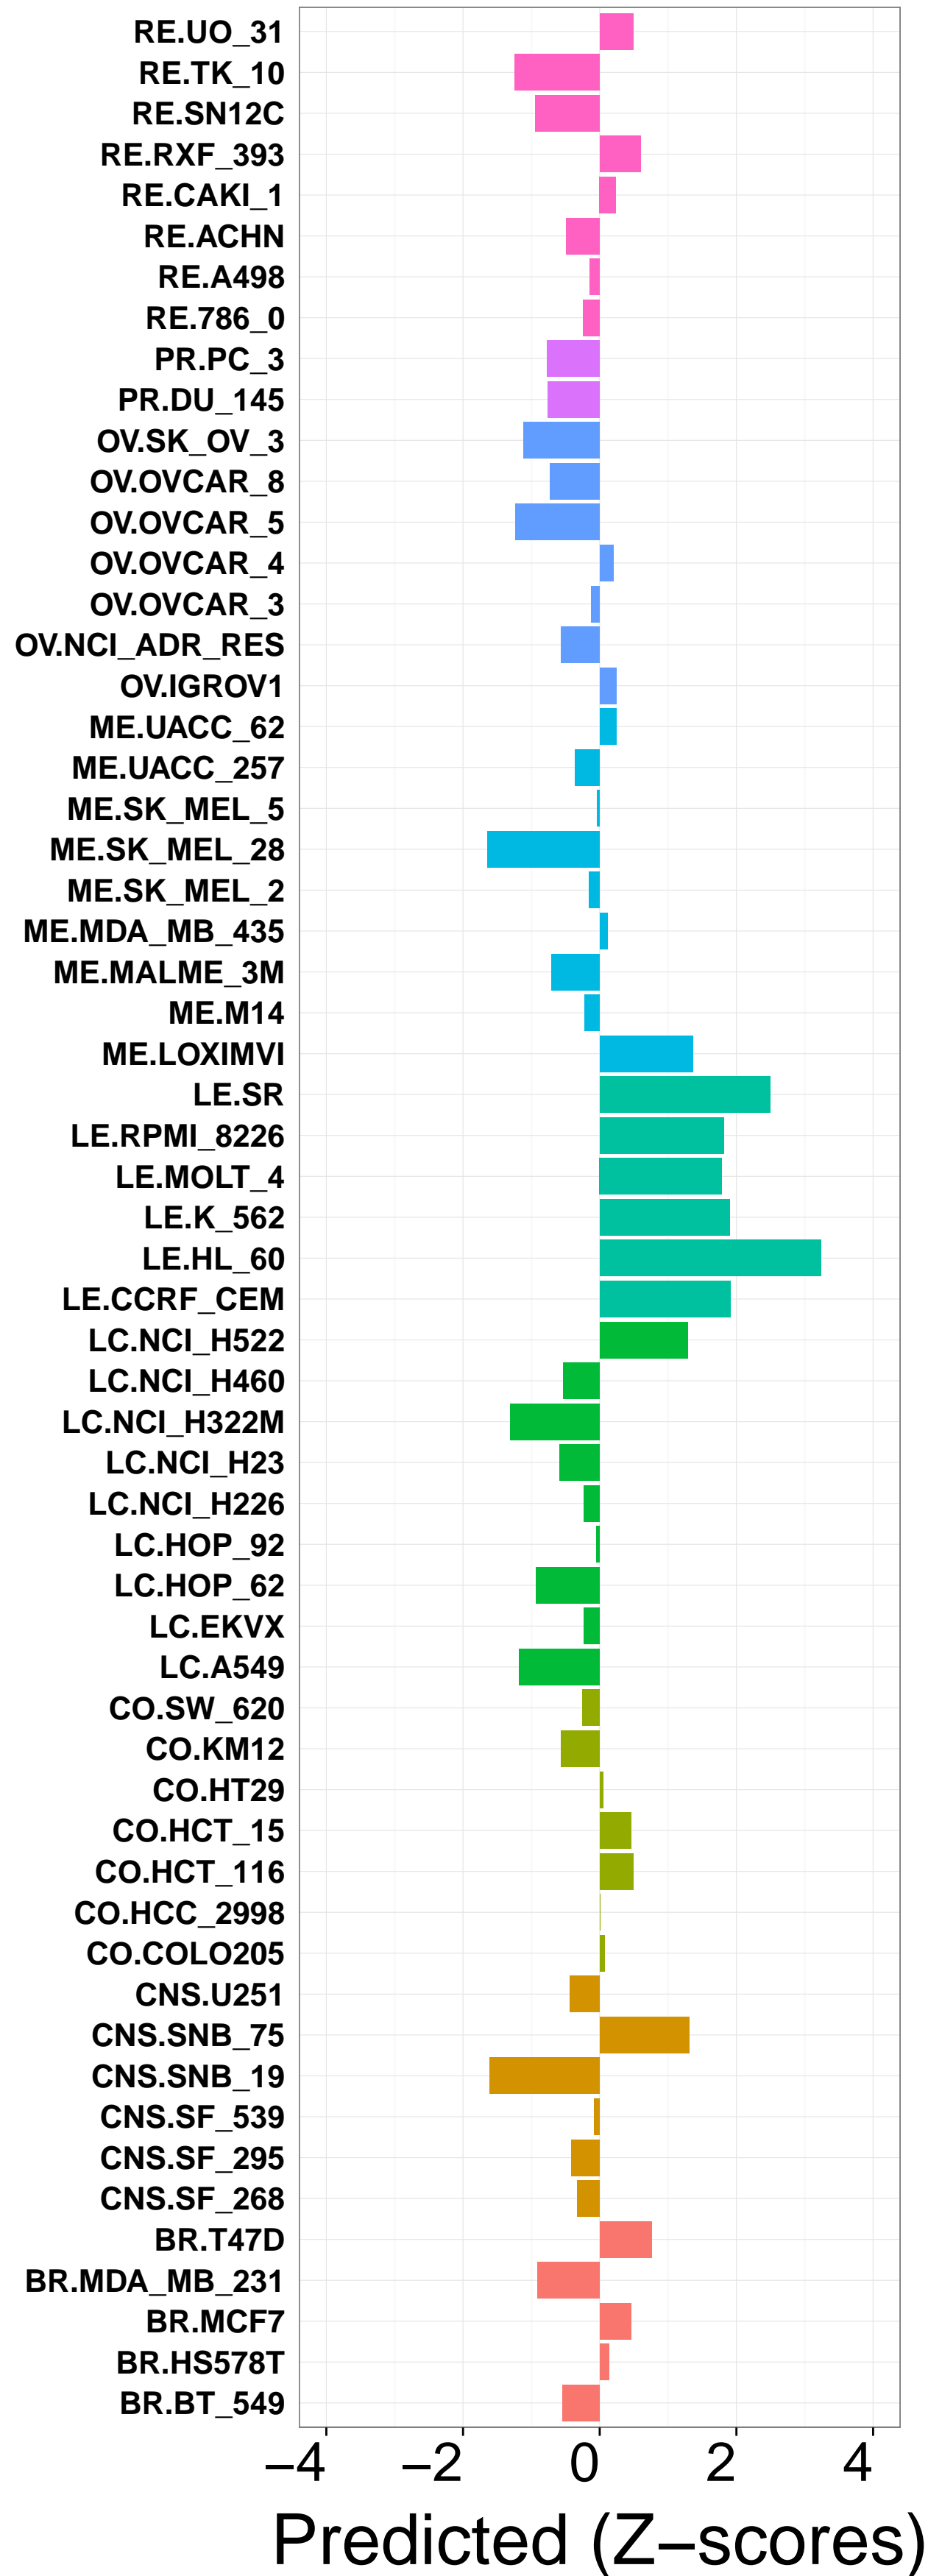

# NSC 609699, Topotecan\_Hydrochloride (LOCCO)

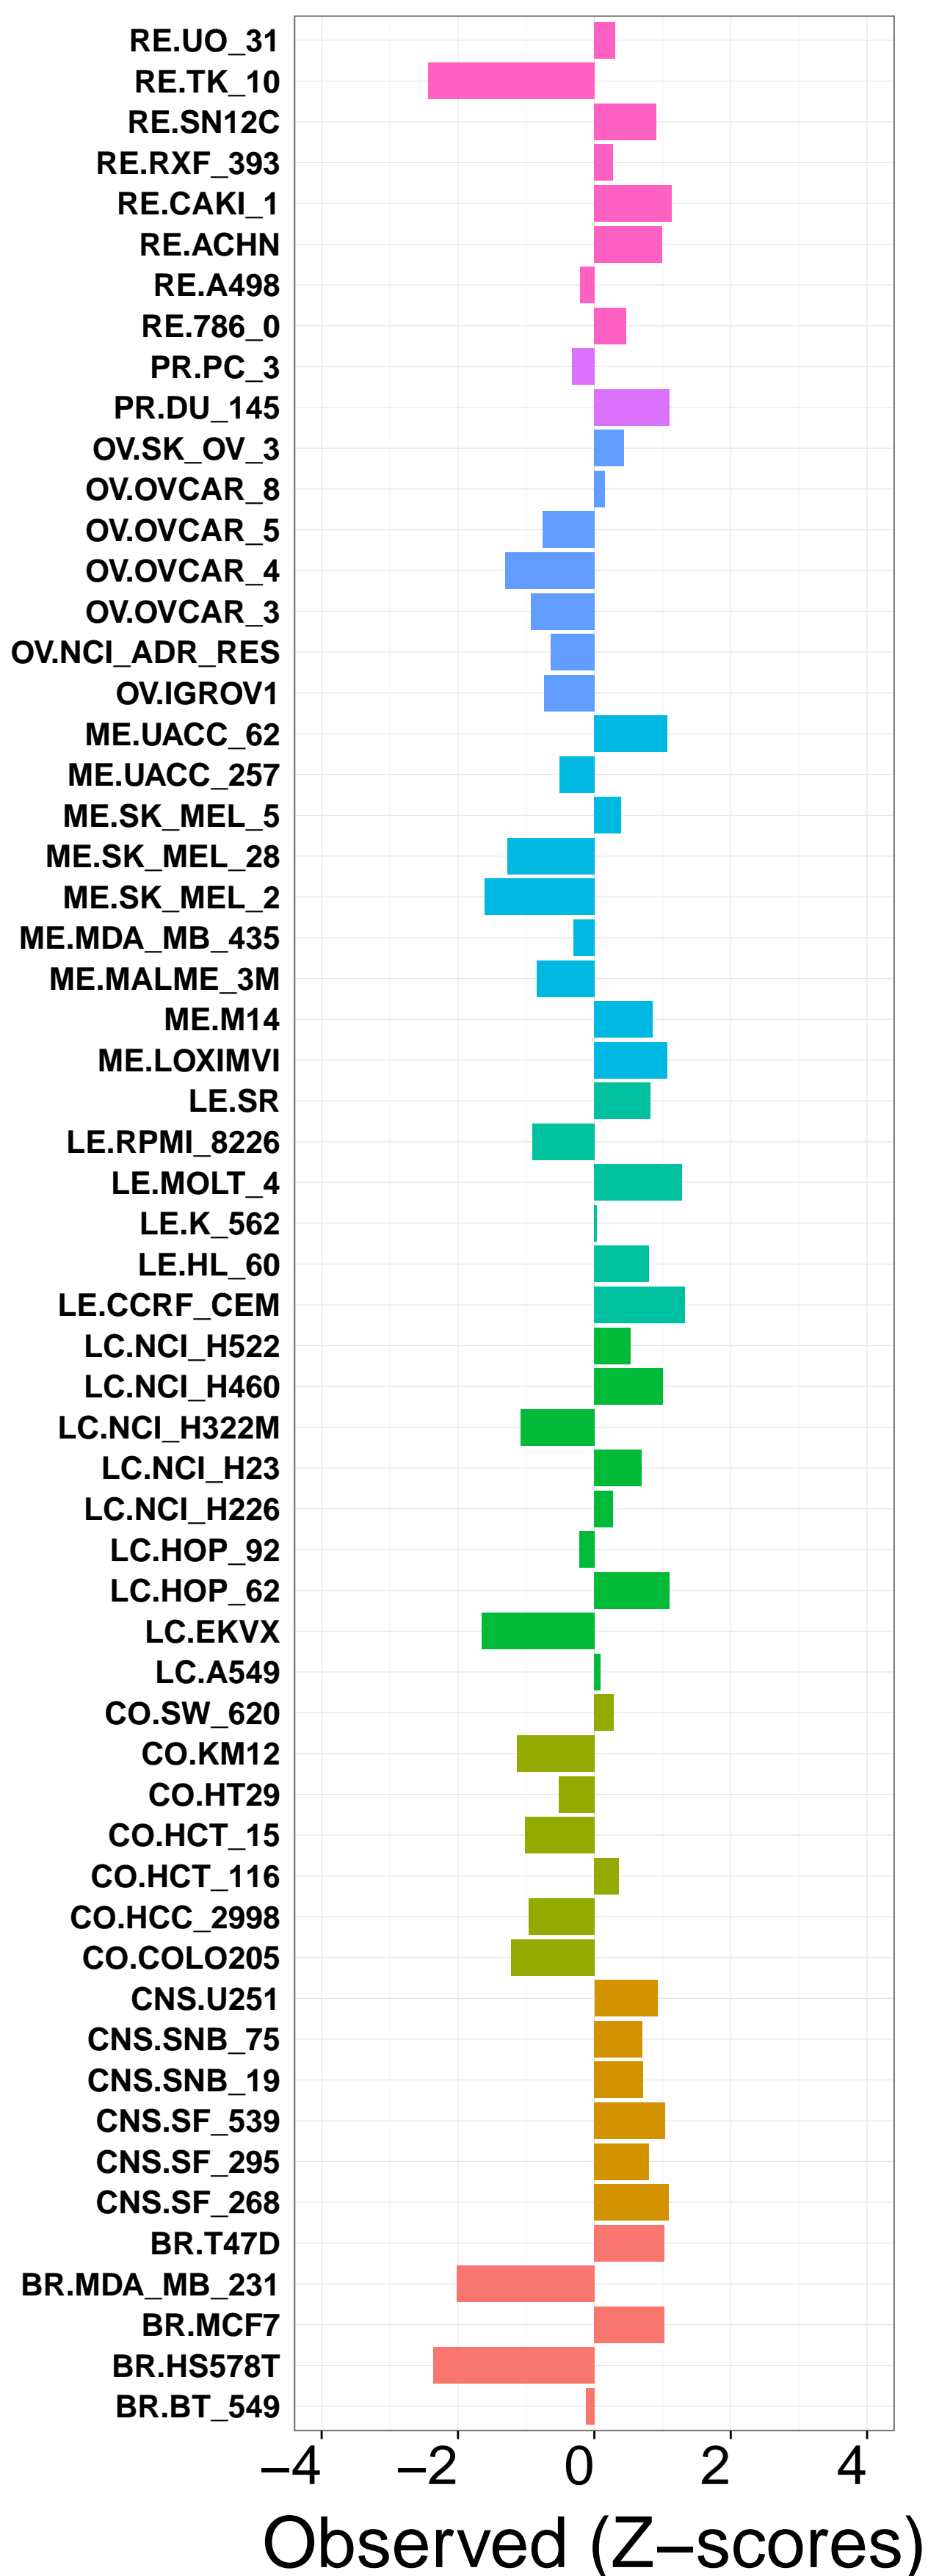

Observed (Z-scores)

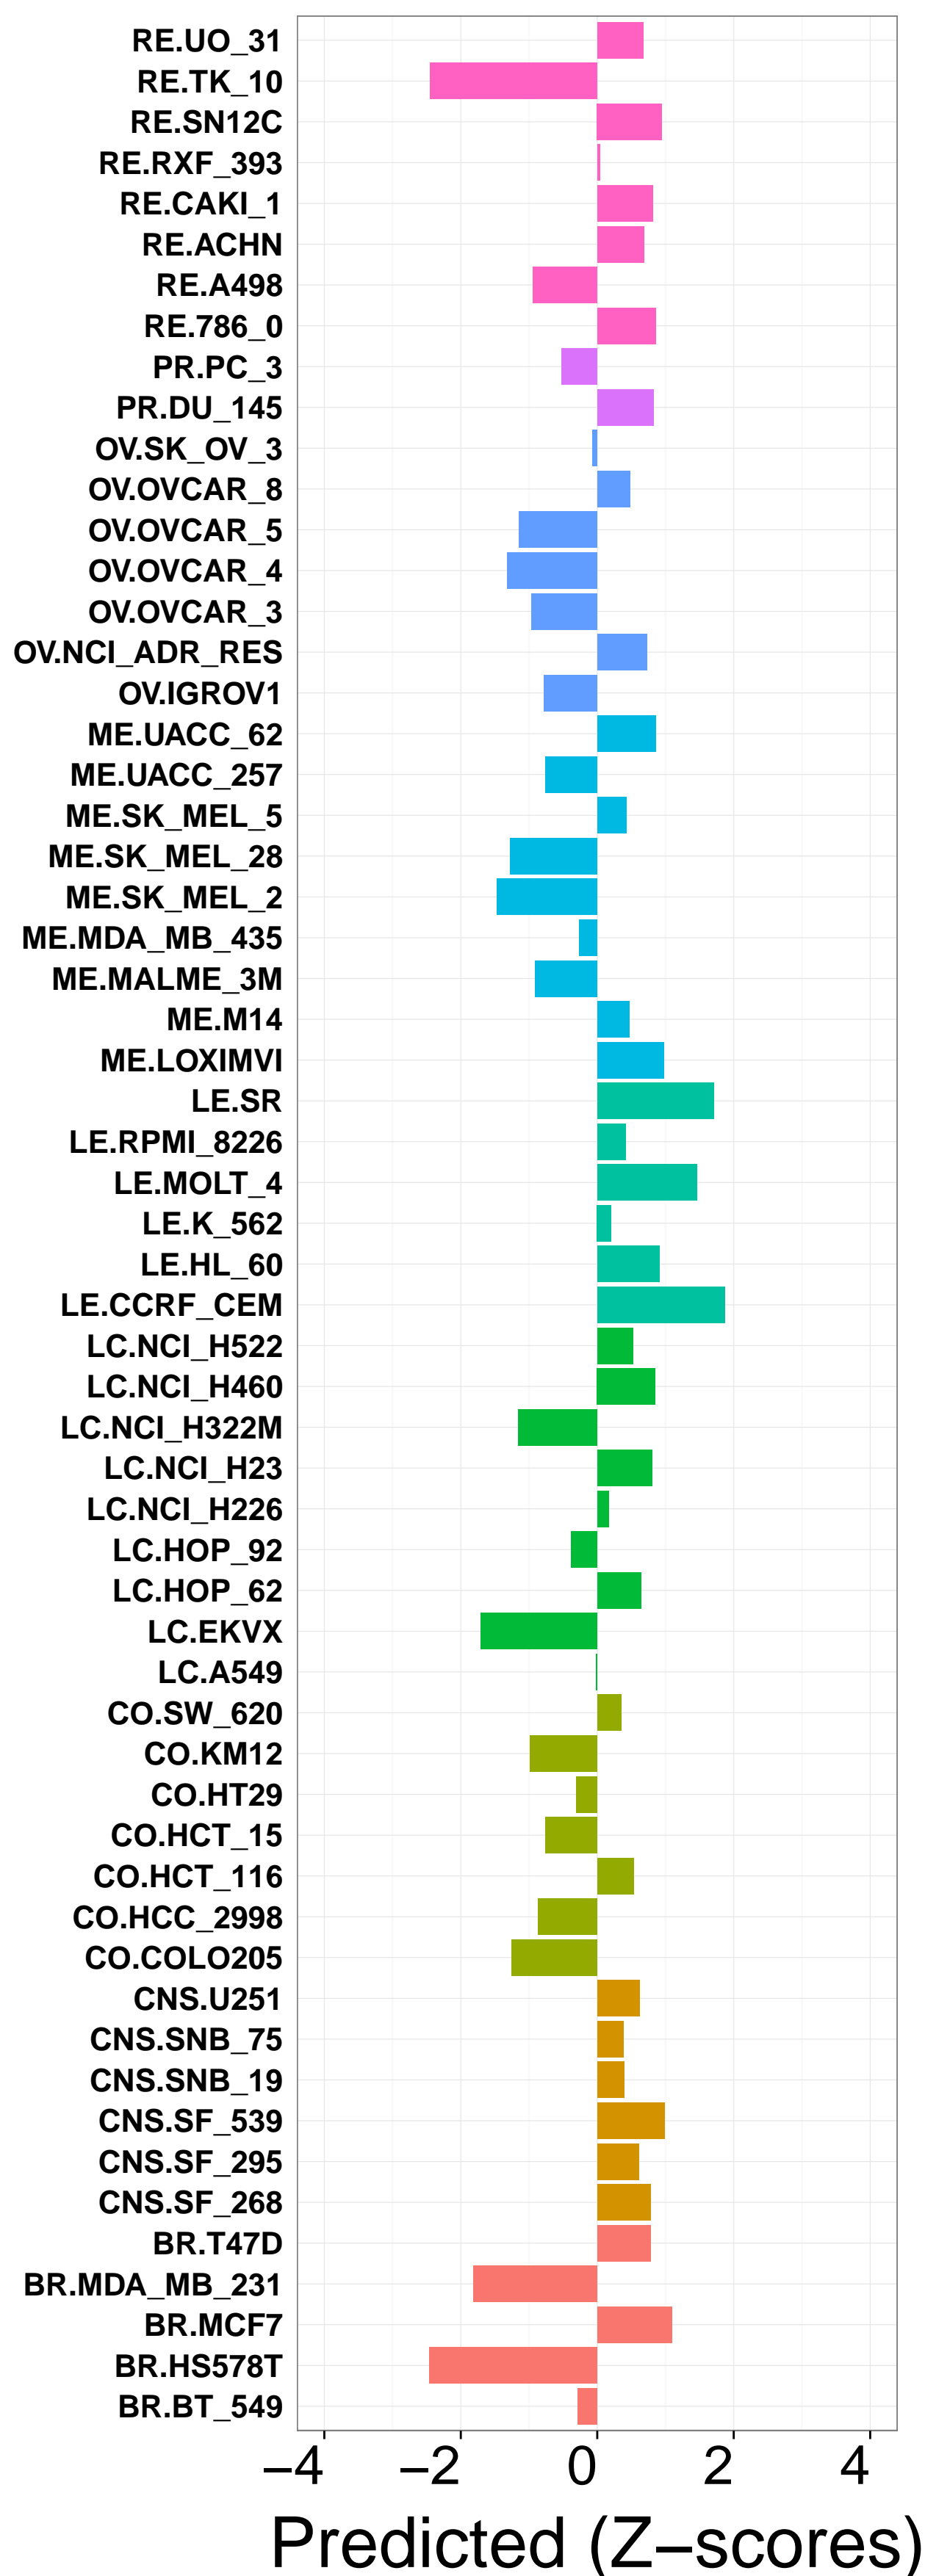

Predicted (Z-scores)

# NSC 613327, (LOCCO)

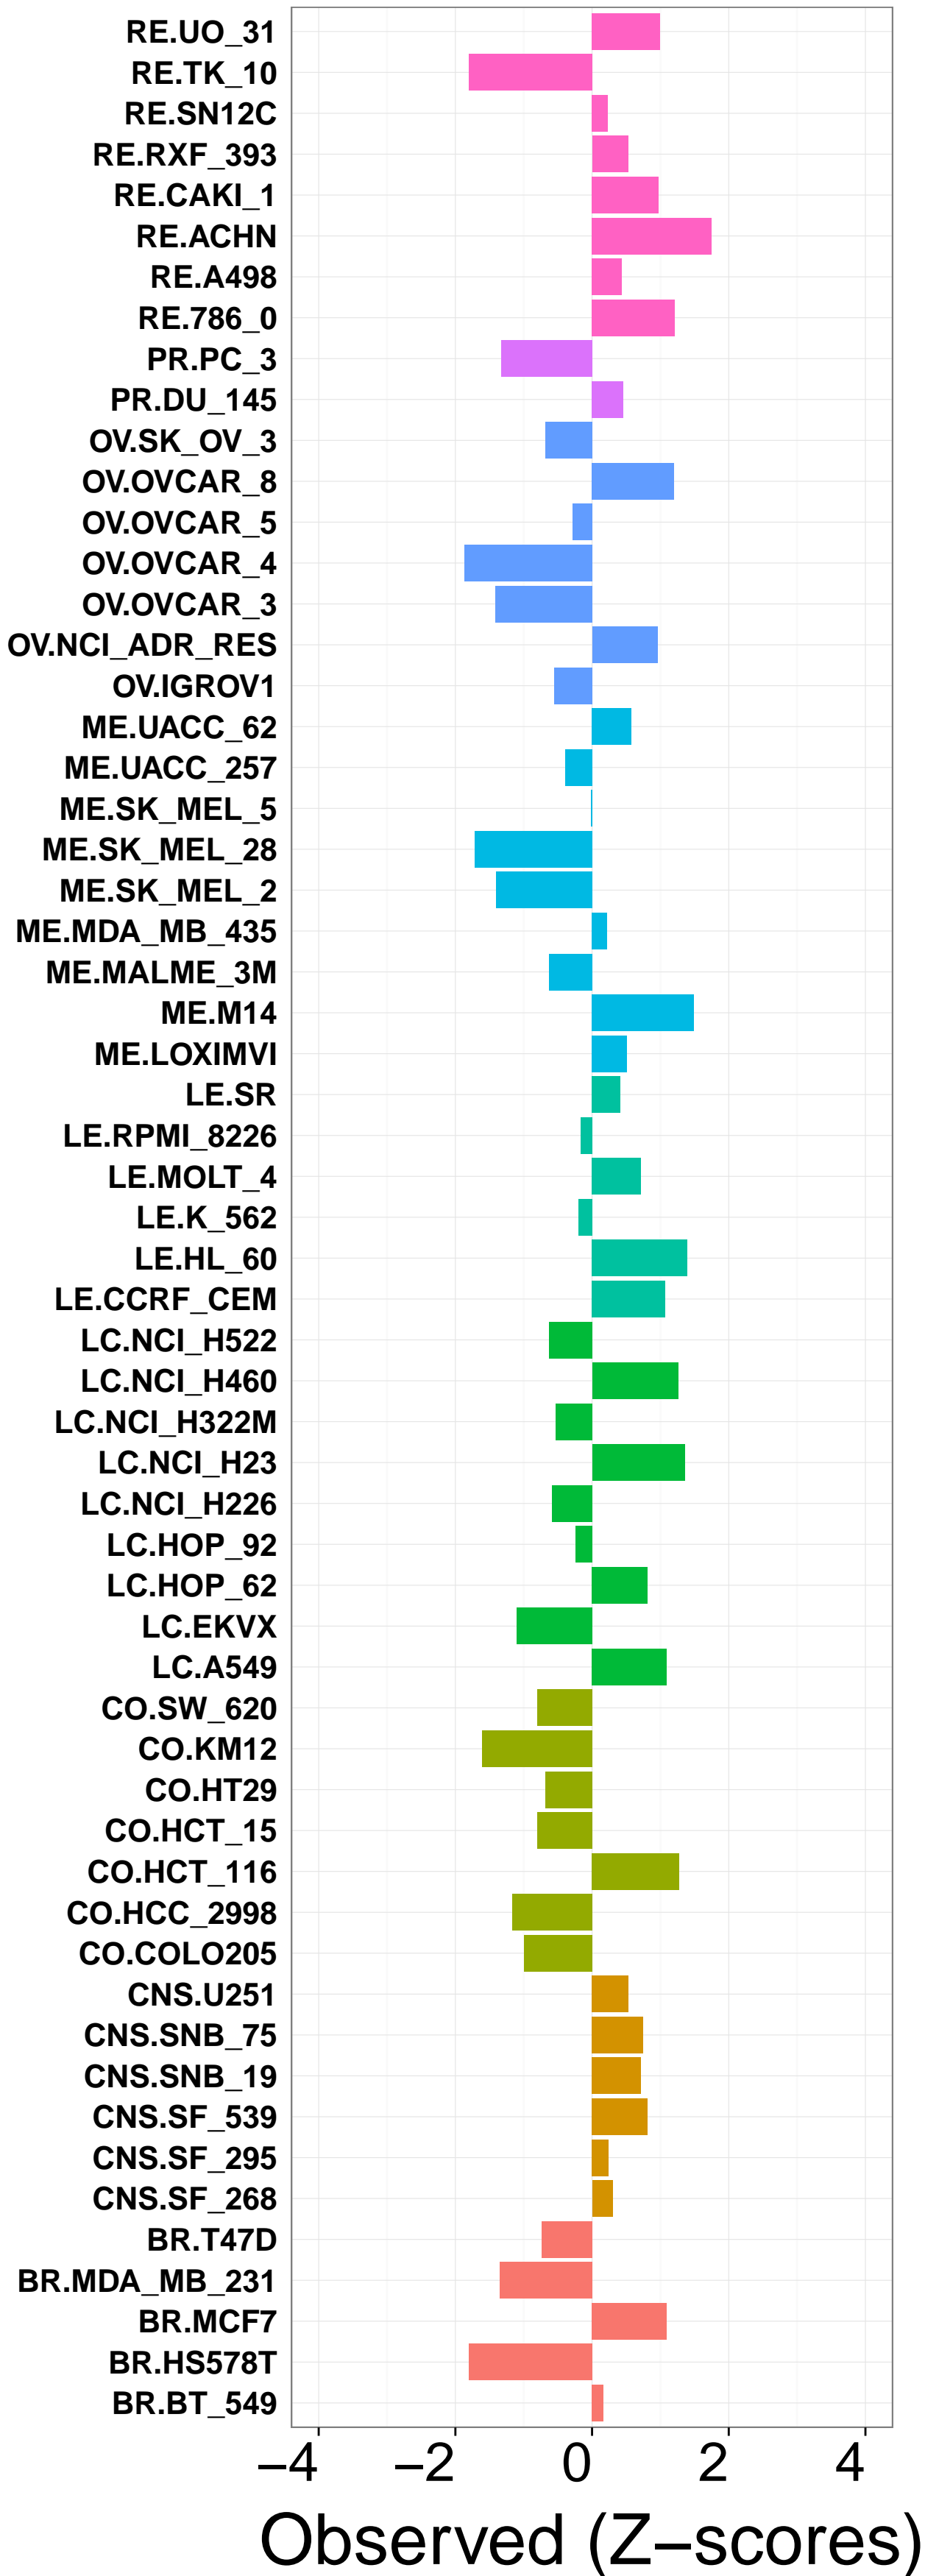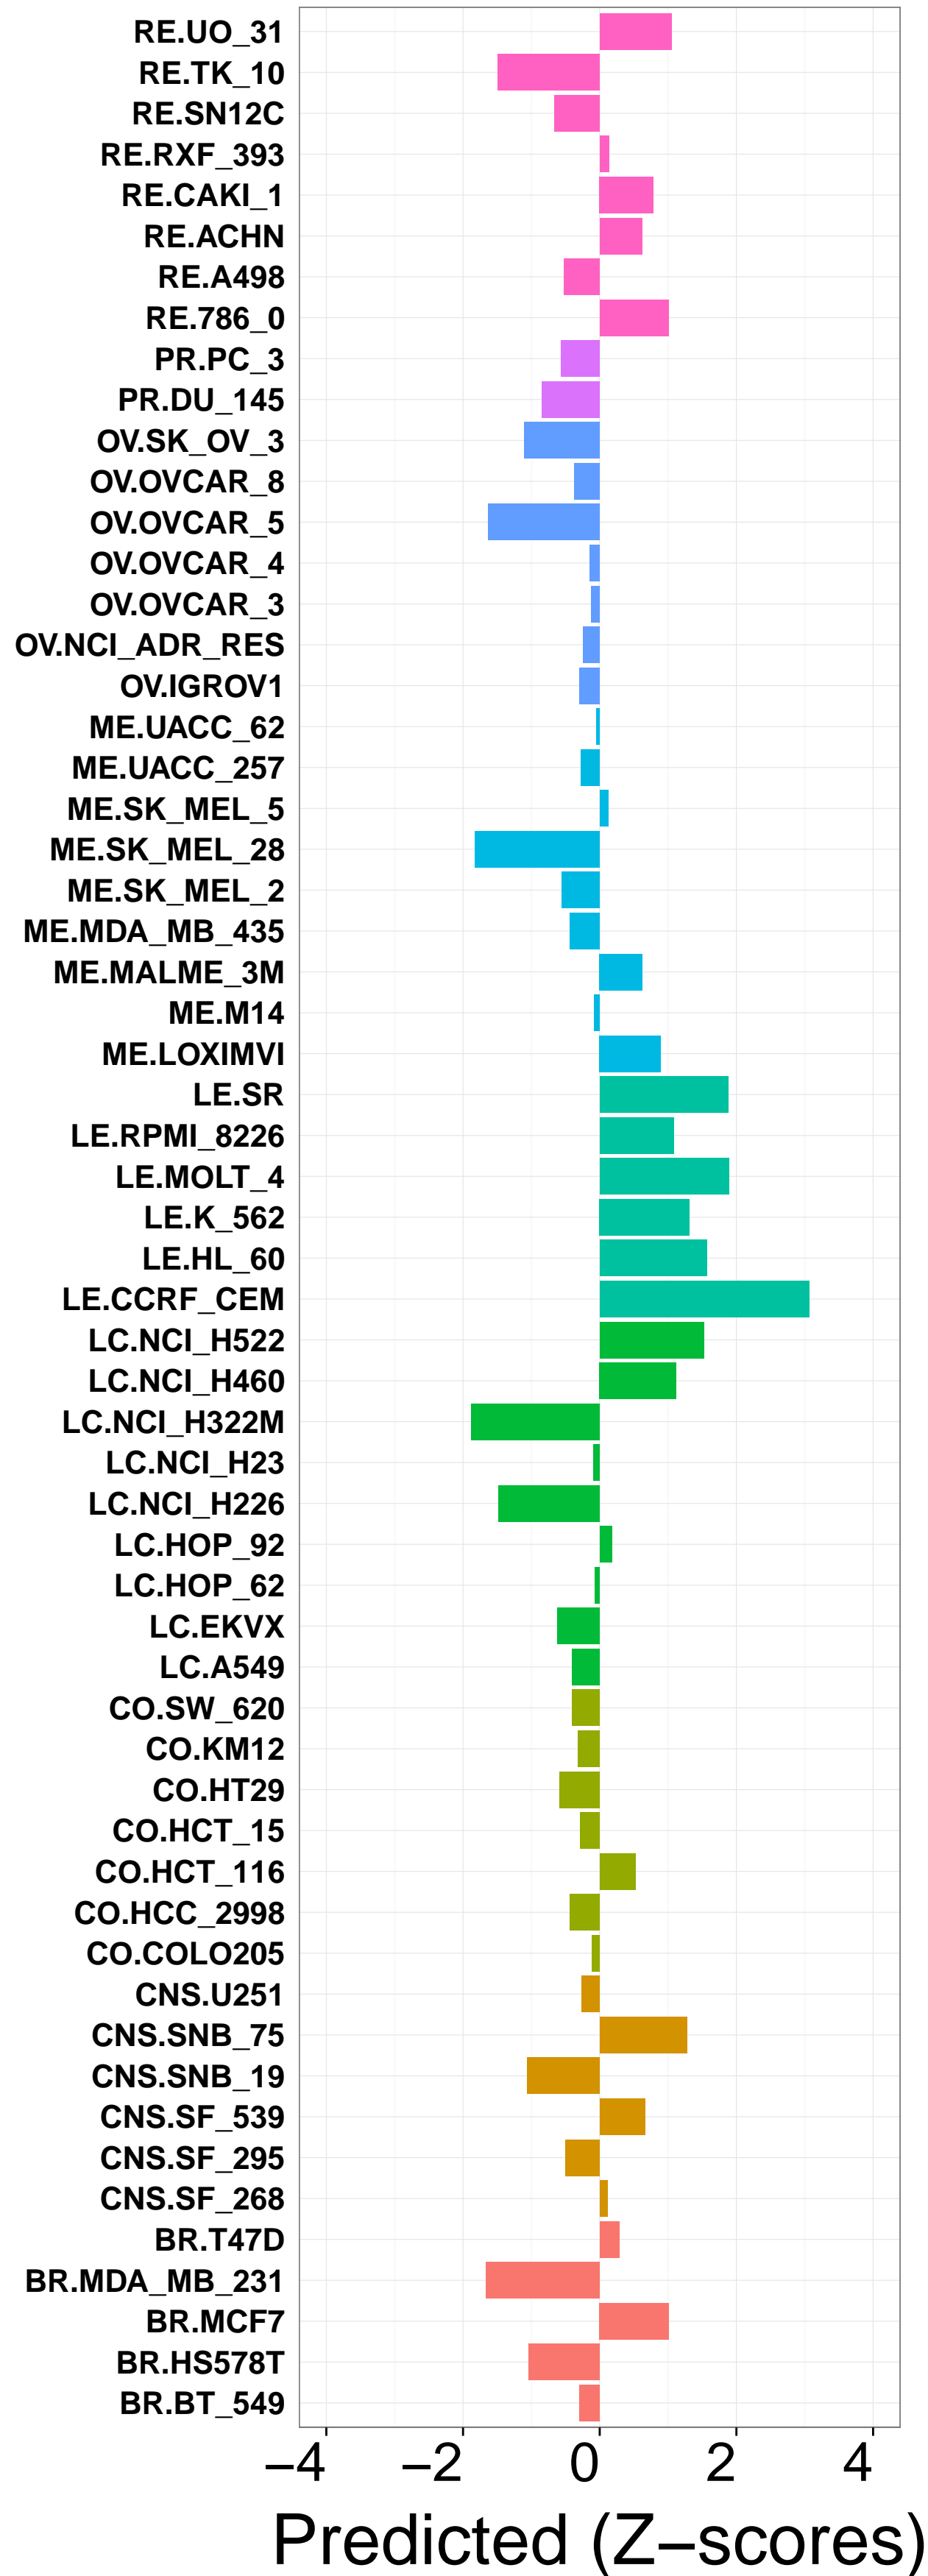

# NSC 628503, Docetaxel (LOCCO)

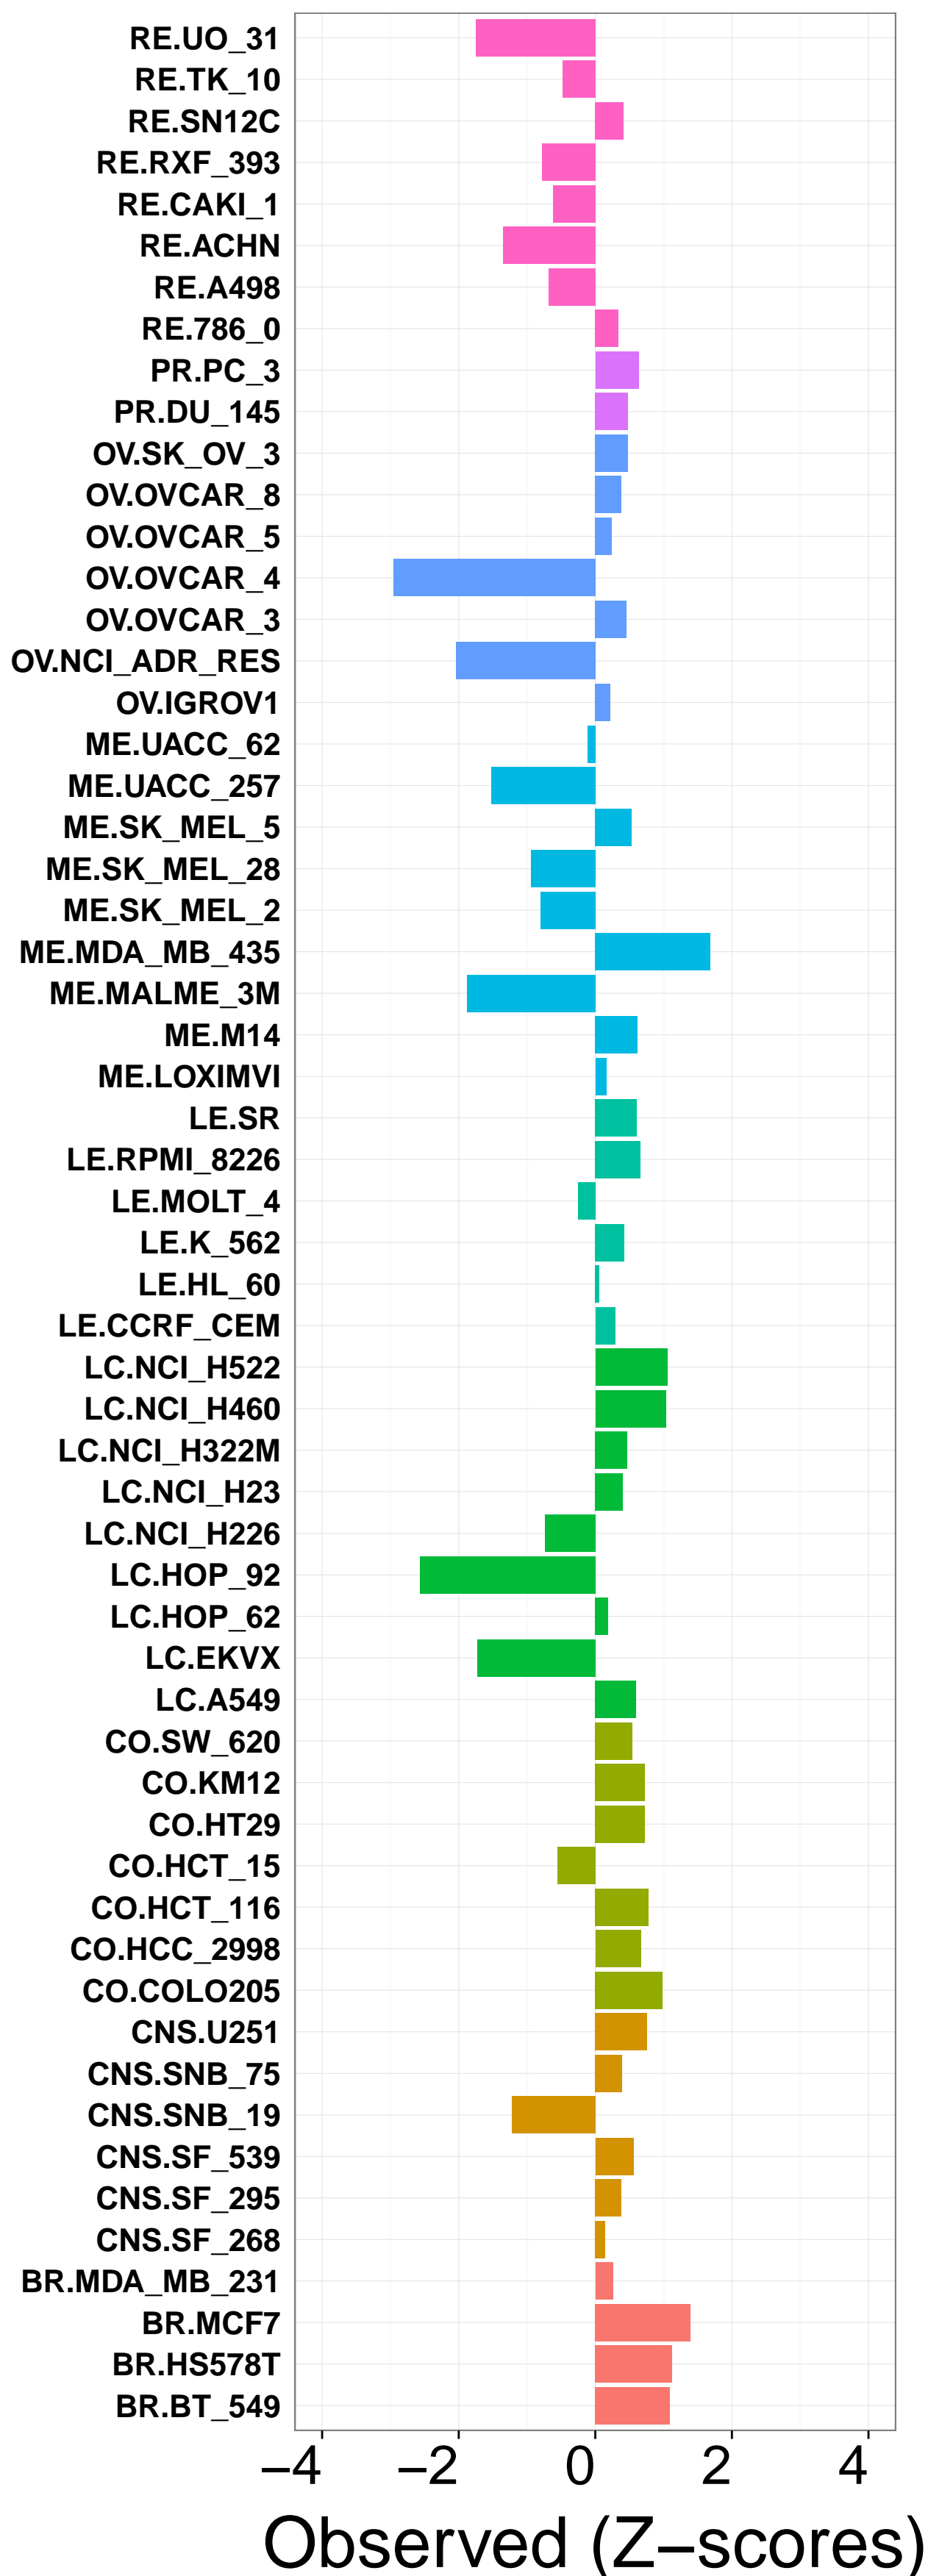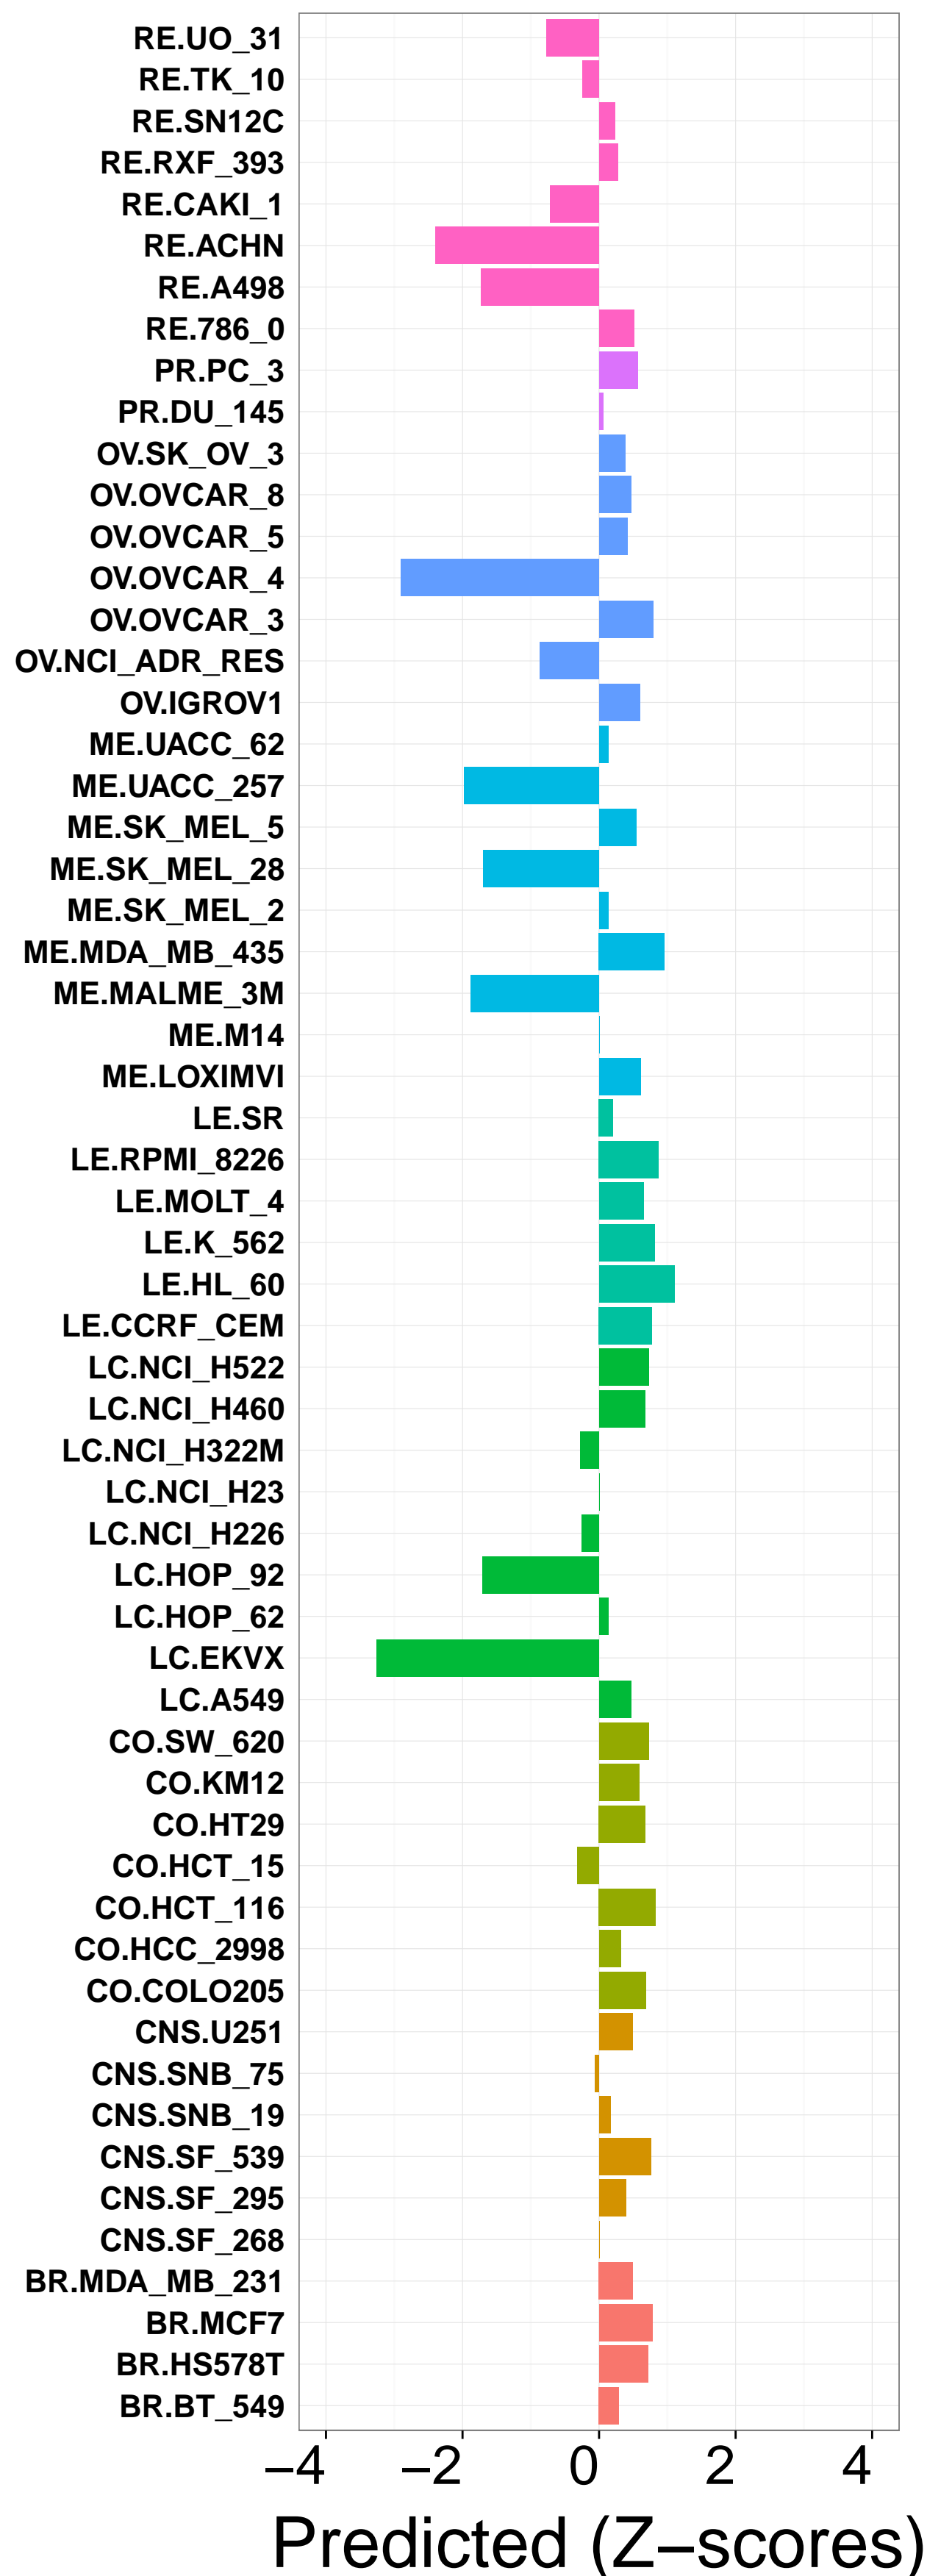

# NSC 630176, Romidepsin (LOCCO)

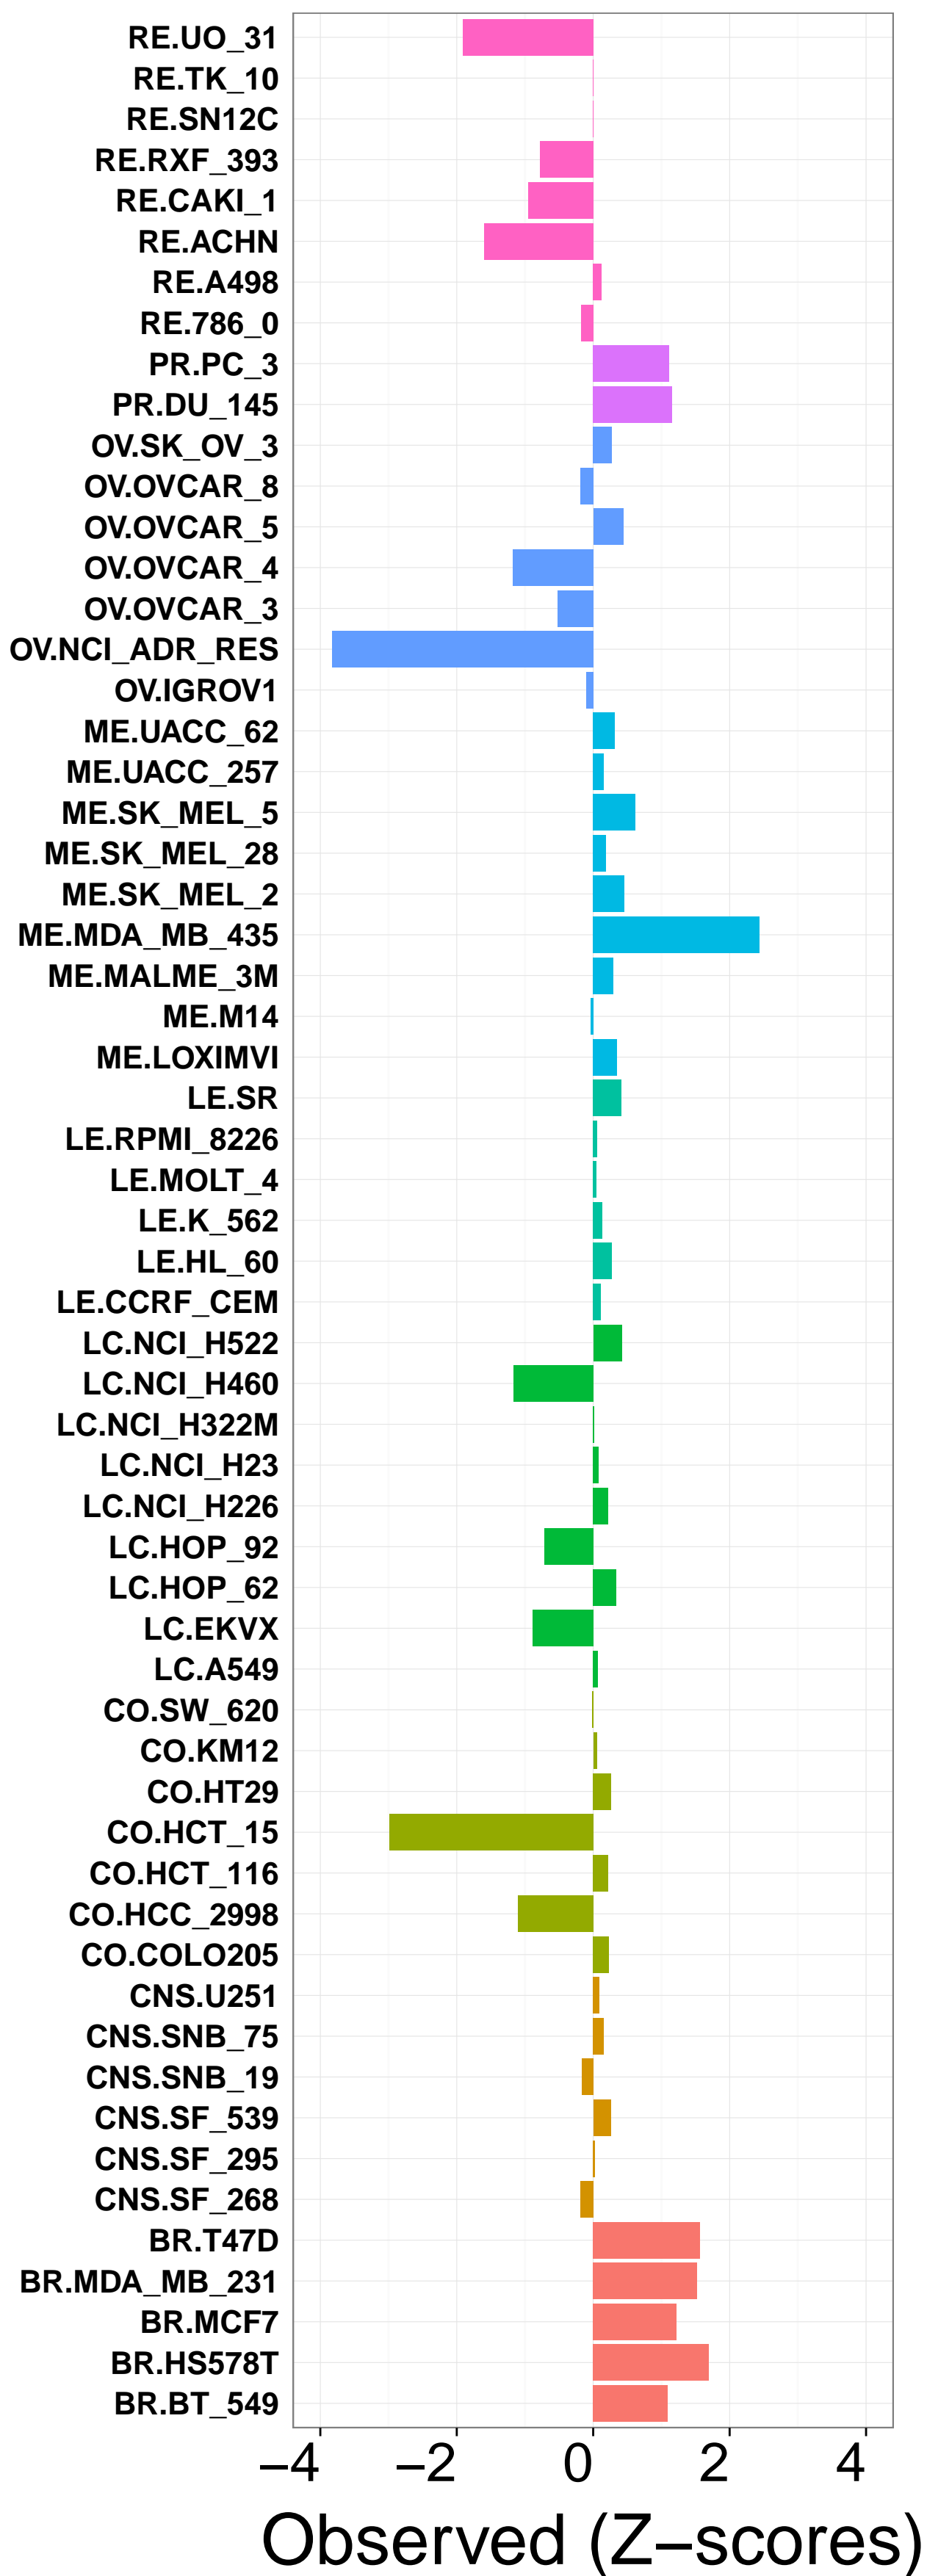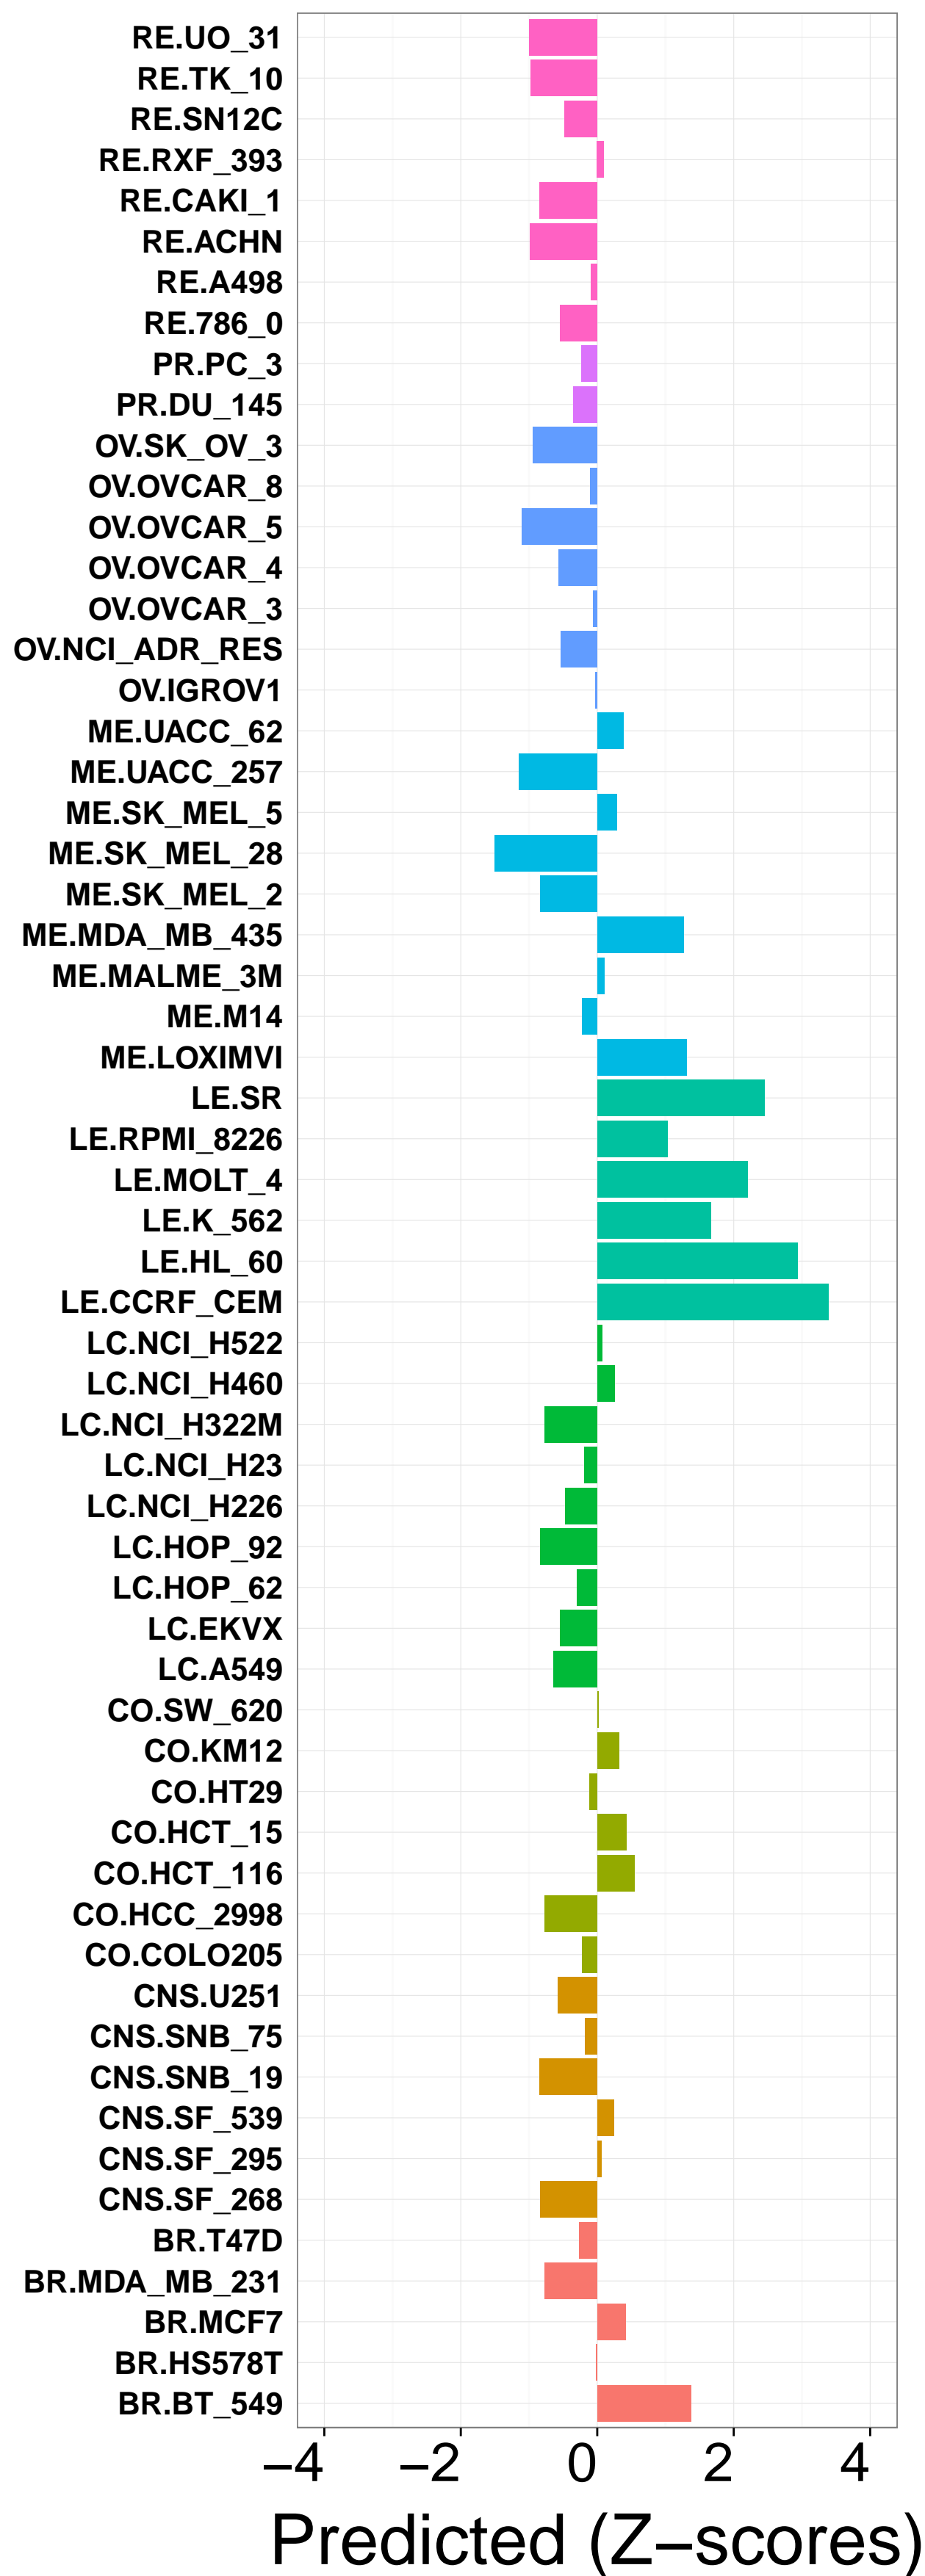



# NSC 633782, (LOCCO)

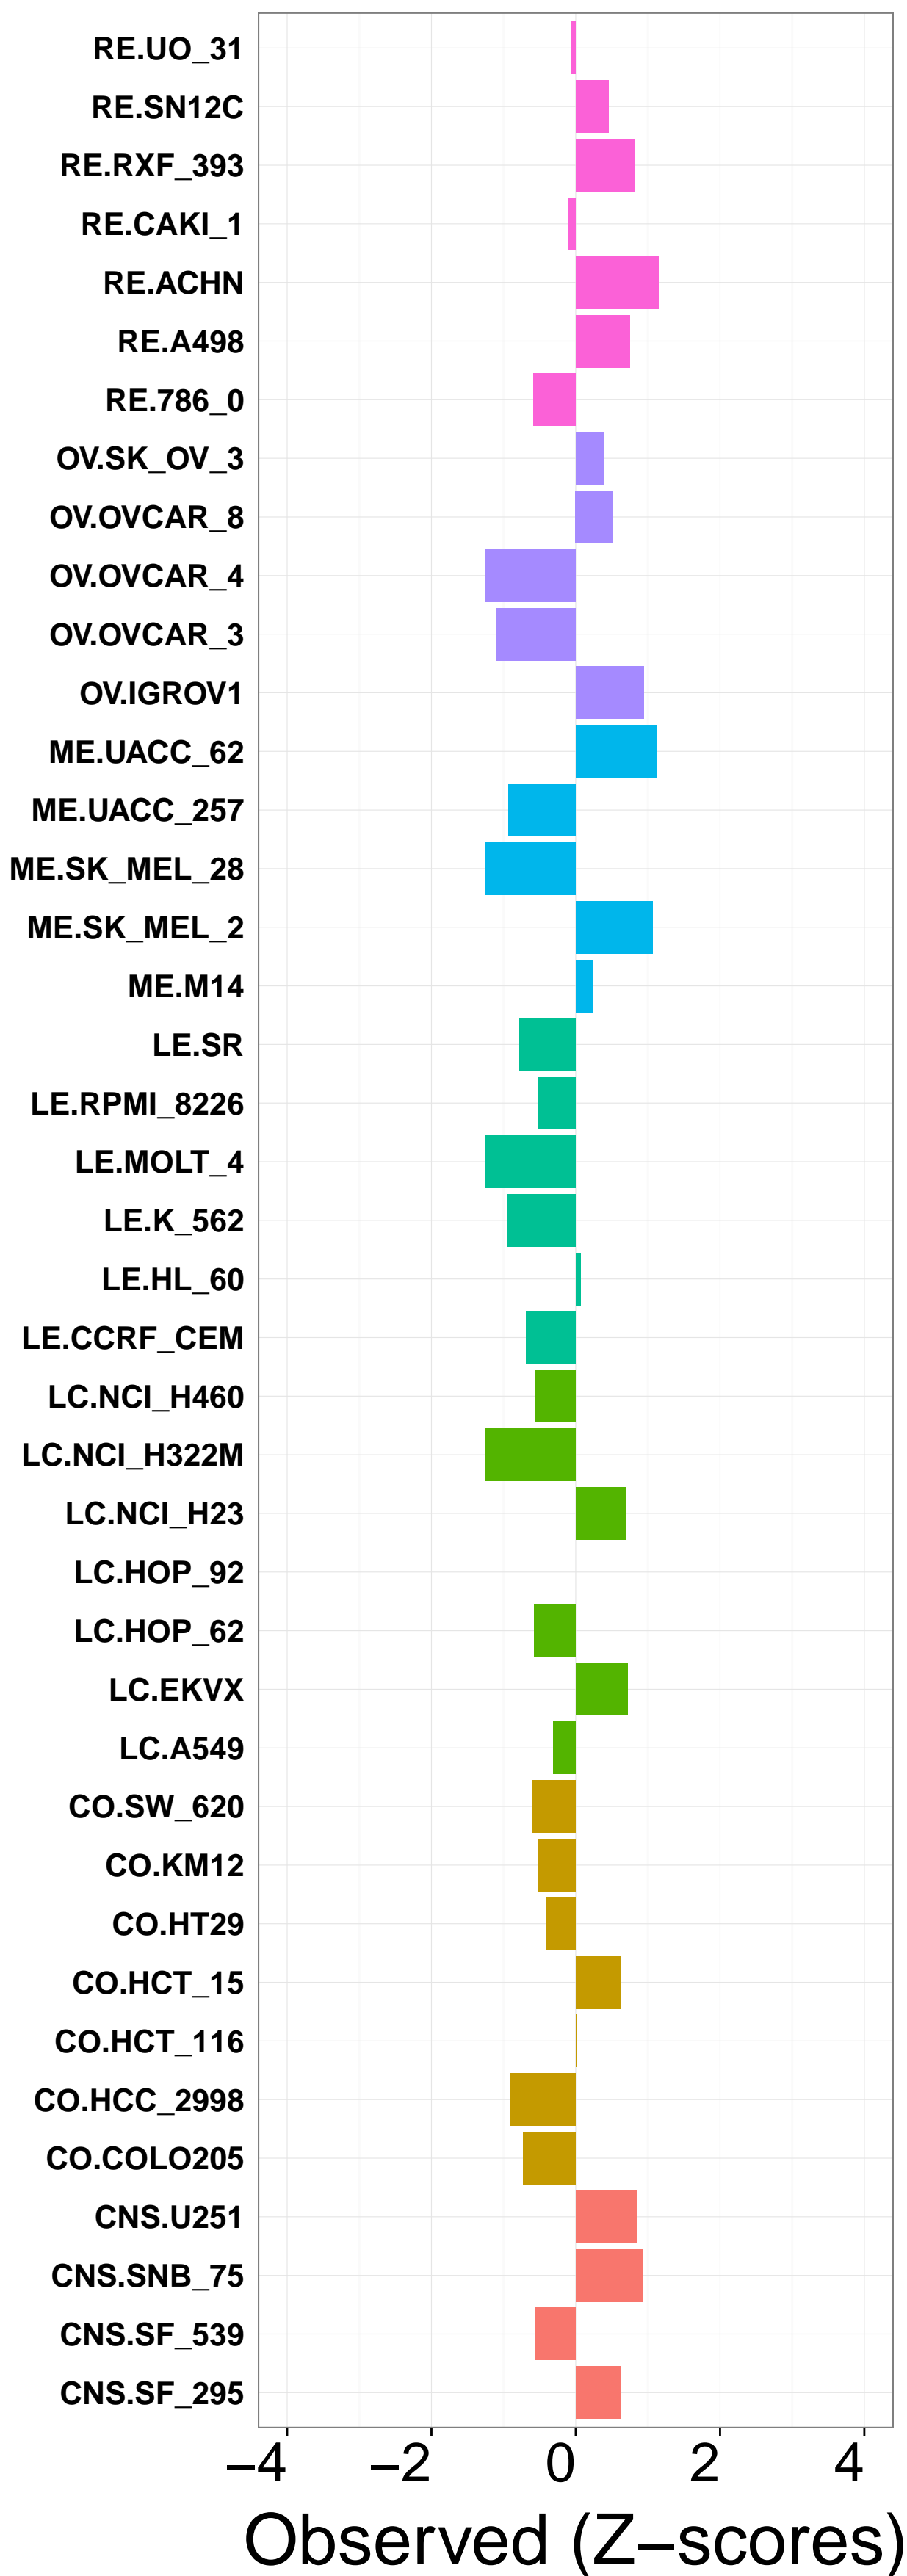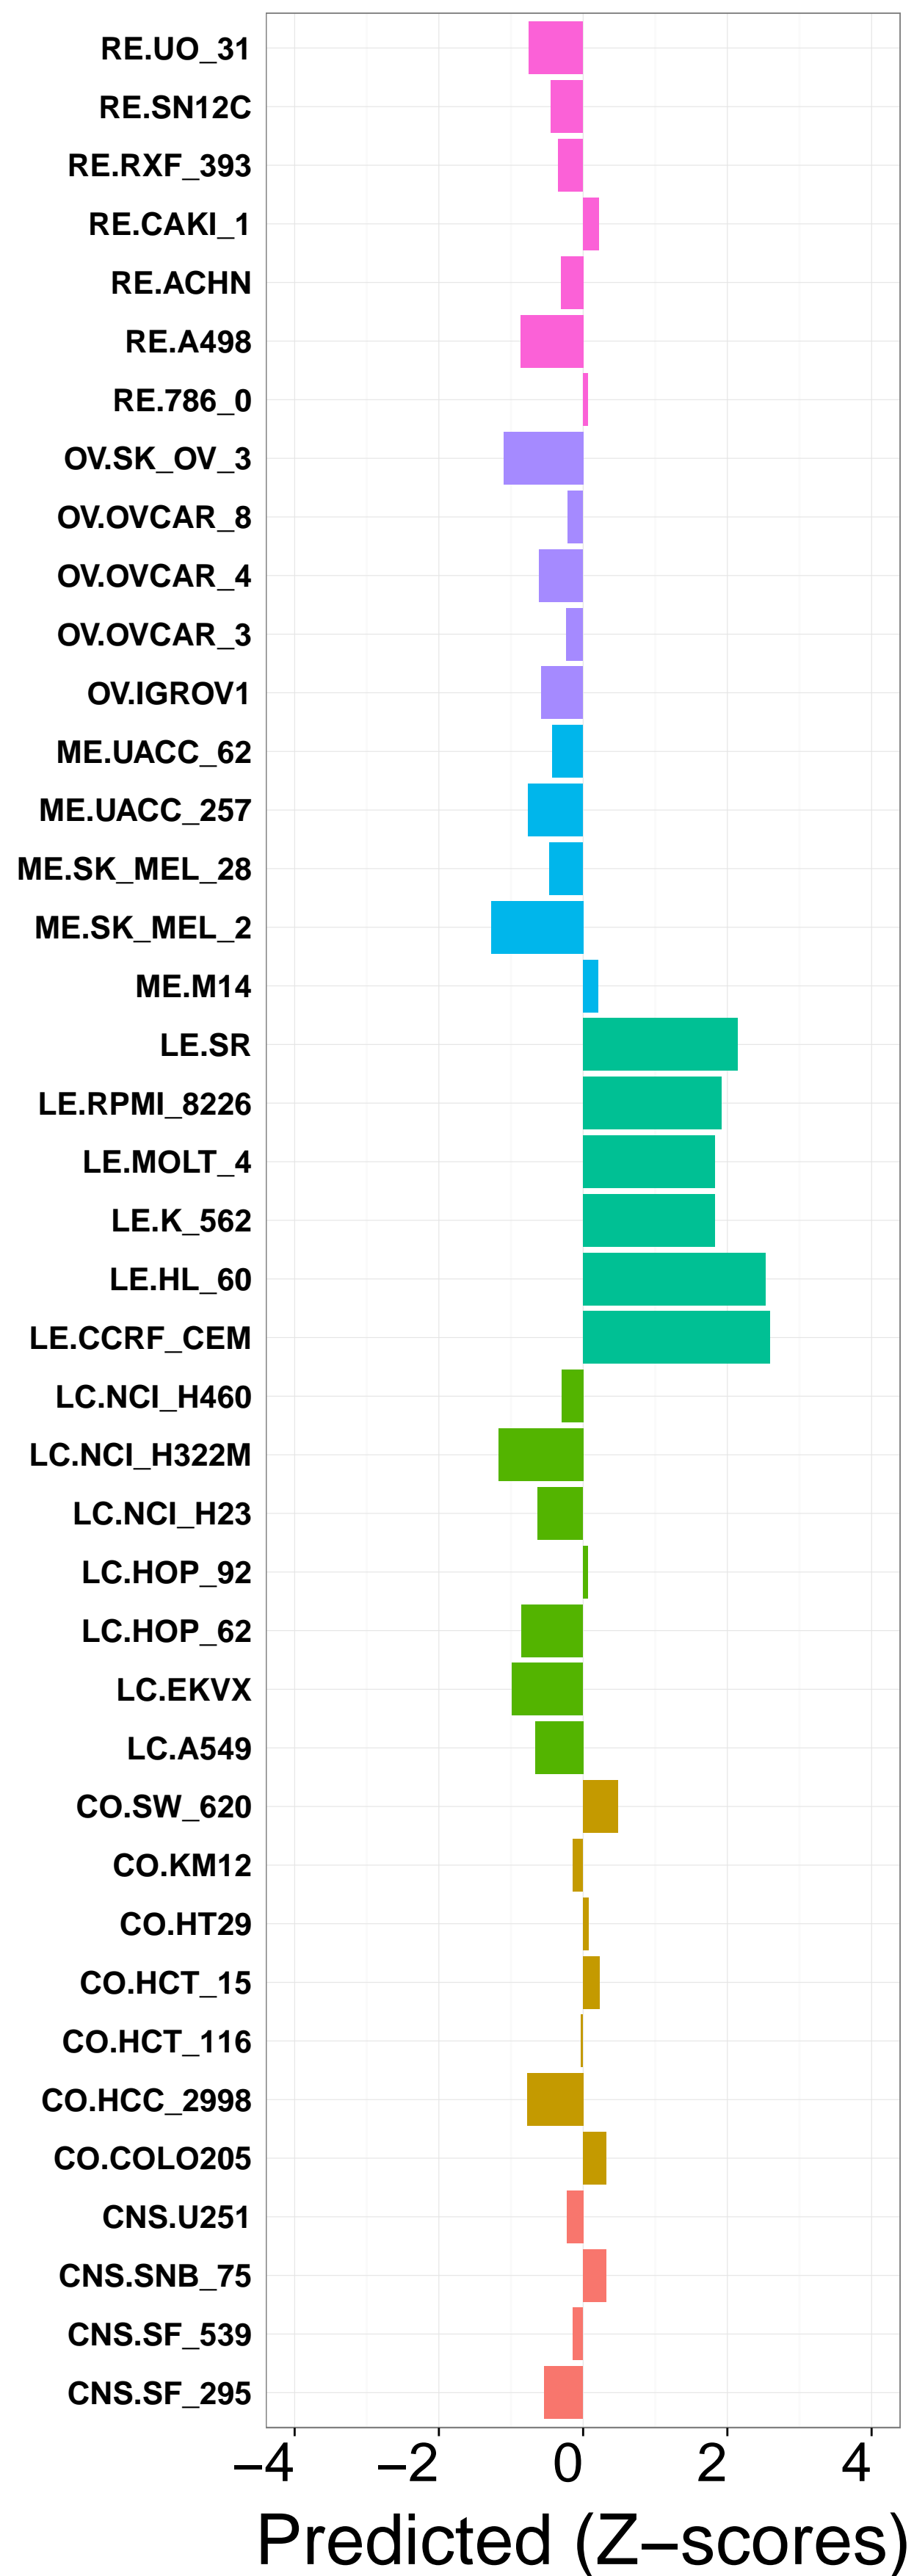

# NSC 63878, Cytarabine\_Hydrochloride (LOCCO)

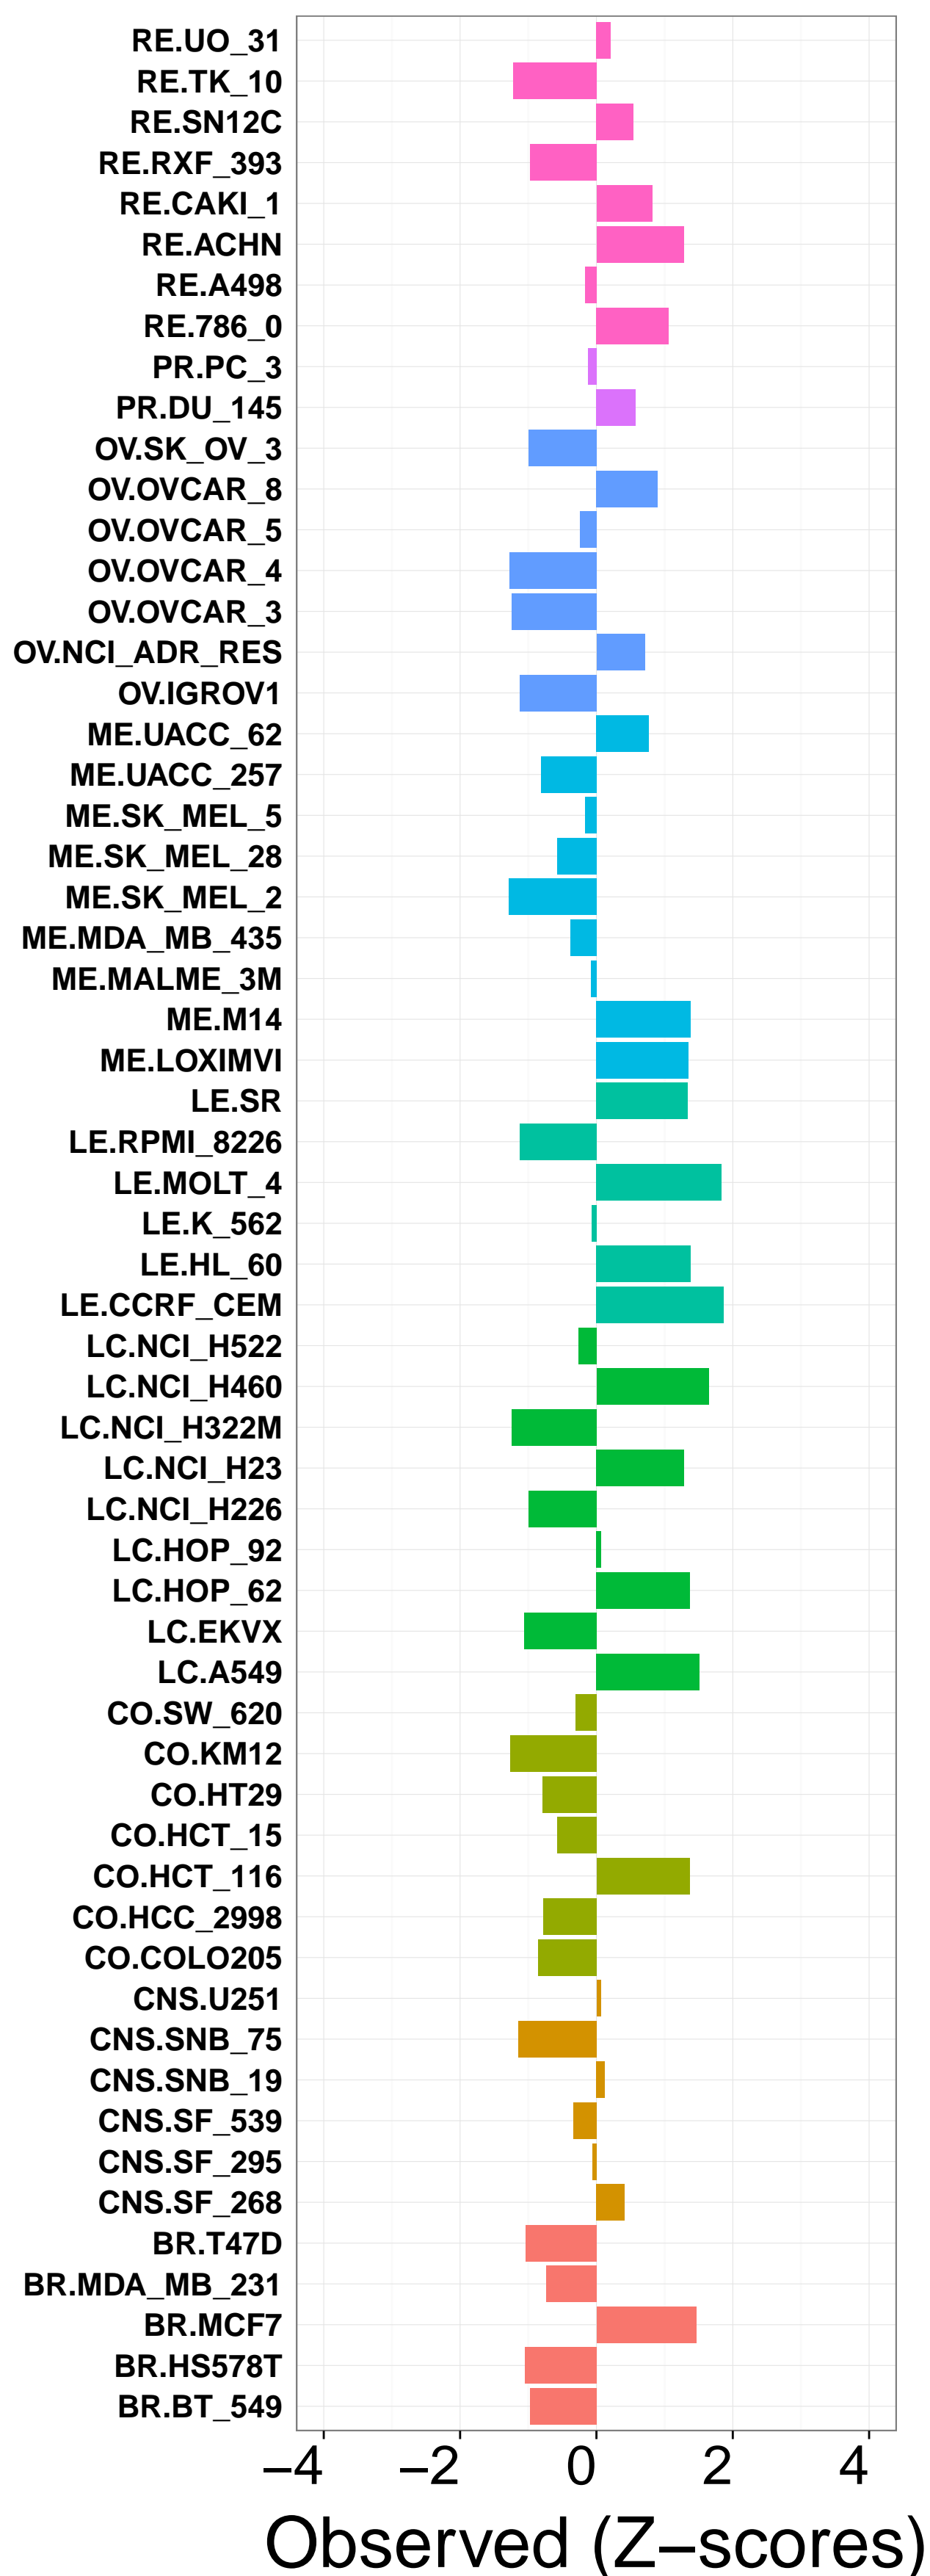

Observed (Z-scores)

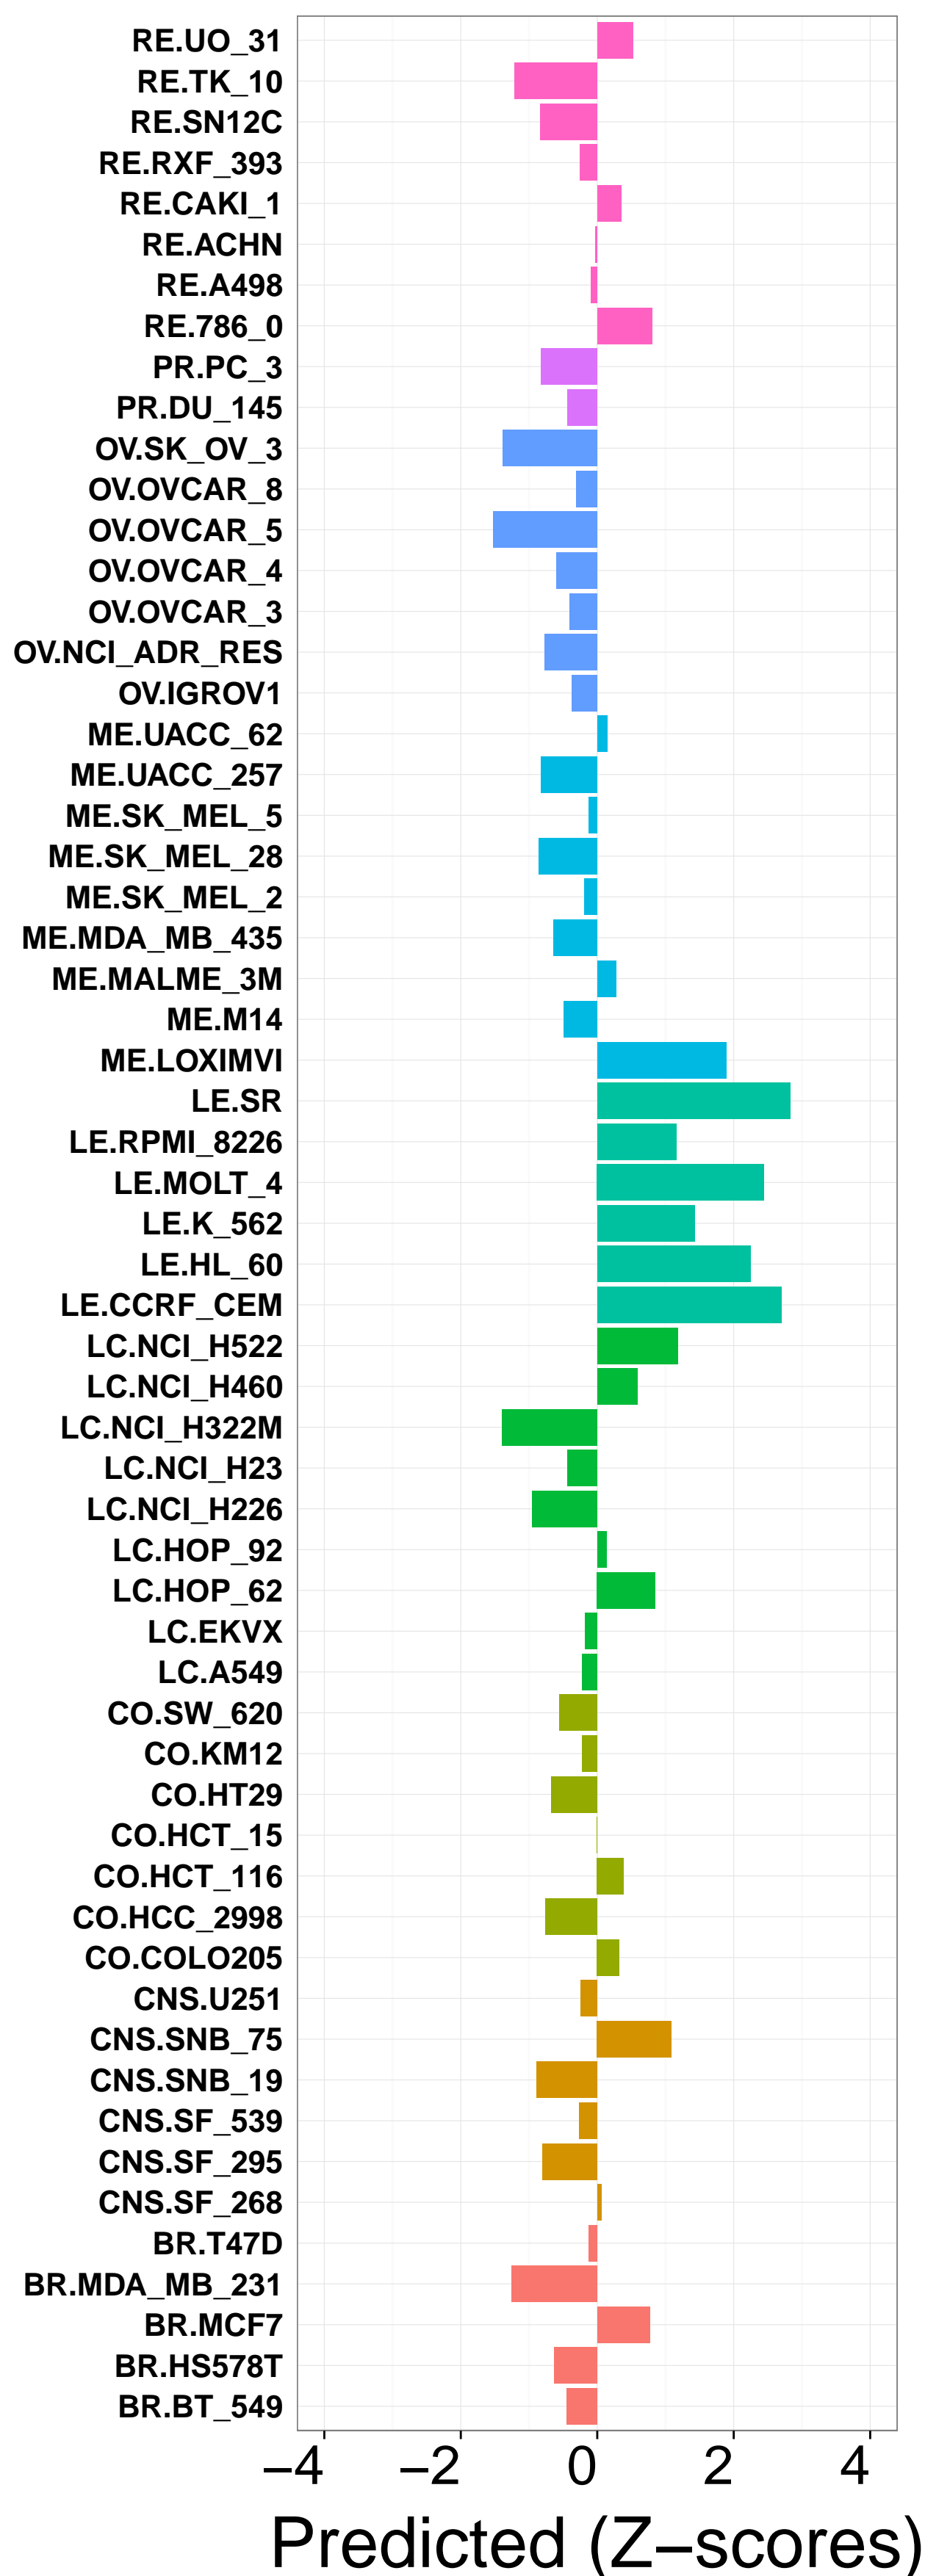

Predicted (Z-scores)

# NSC 639186, (LOCCO)

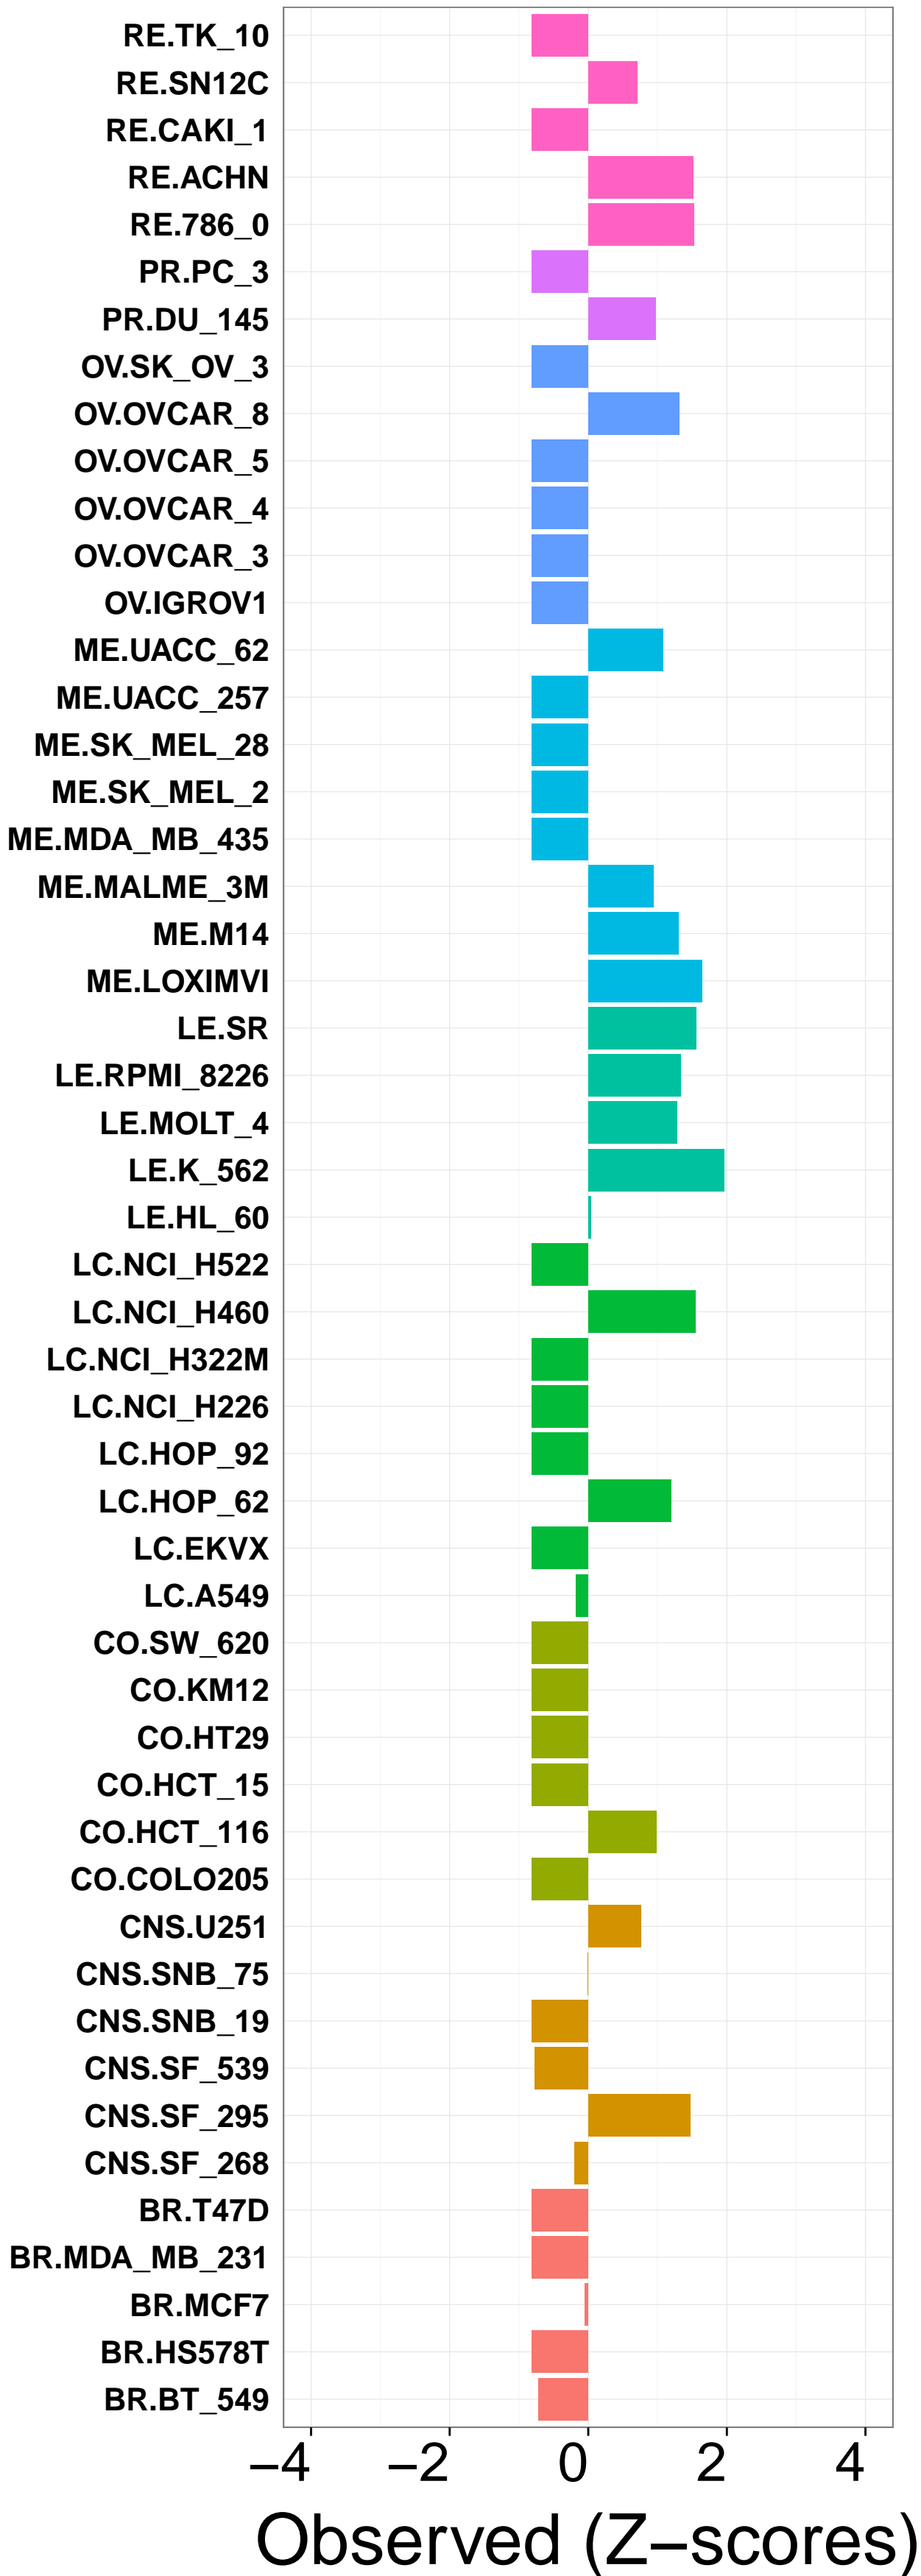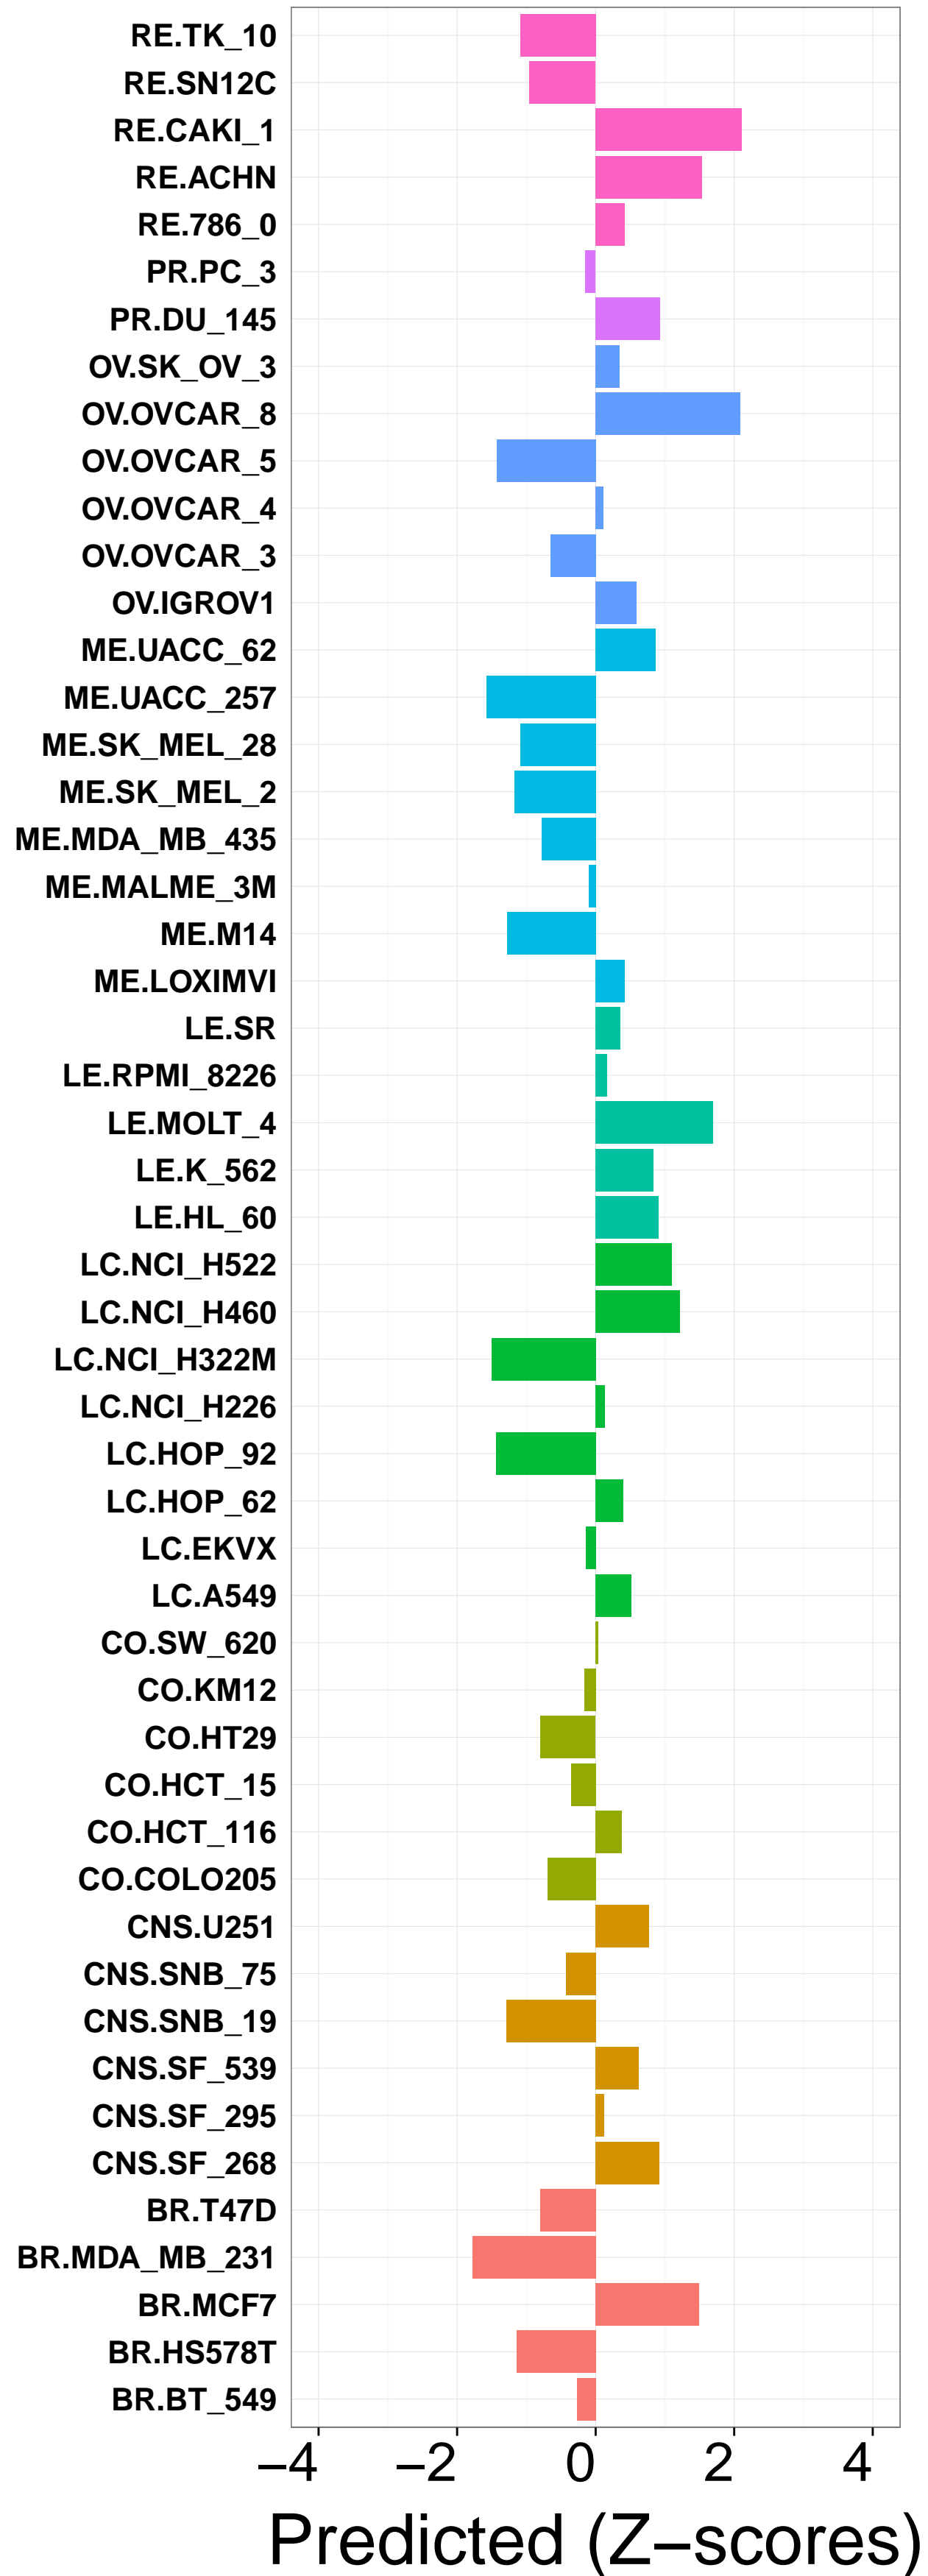

# NSC 656576, (LOCCO)

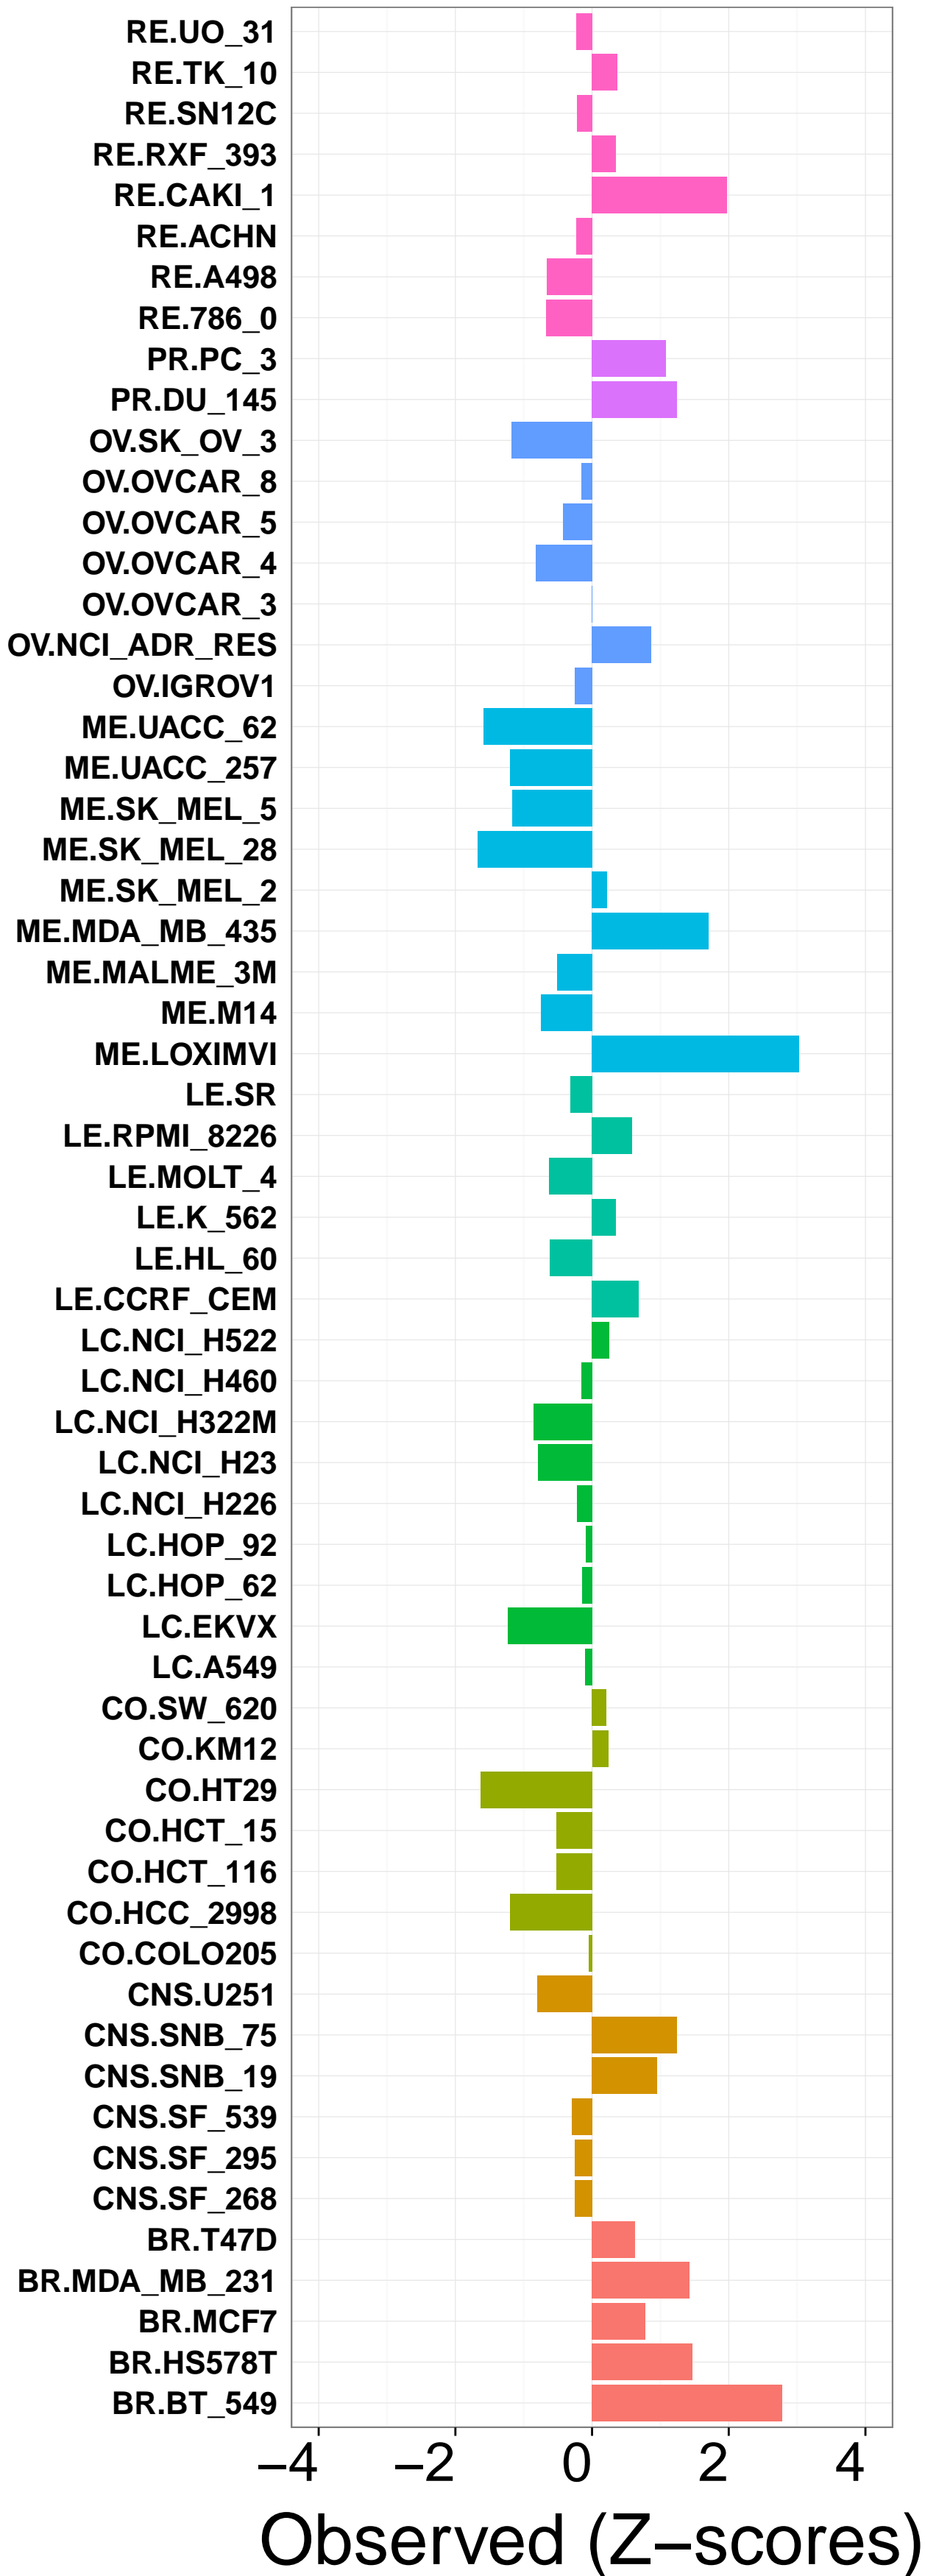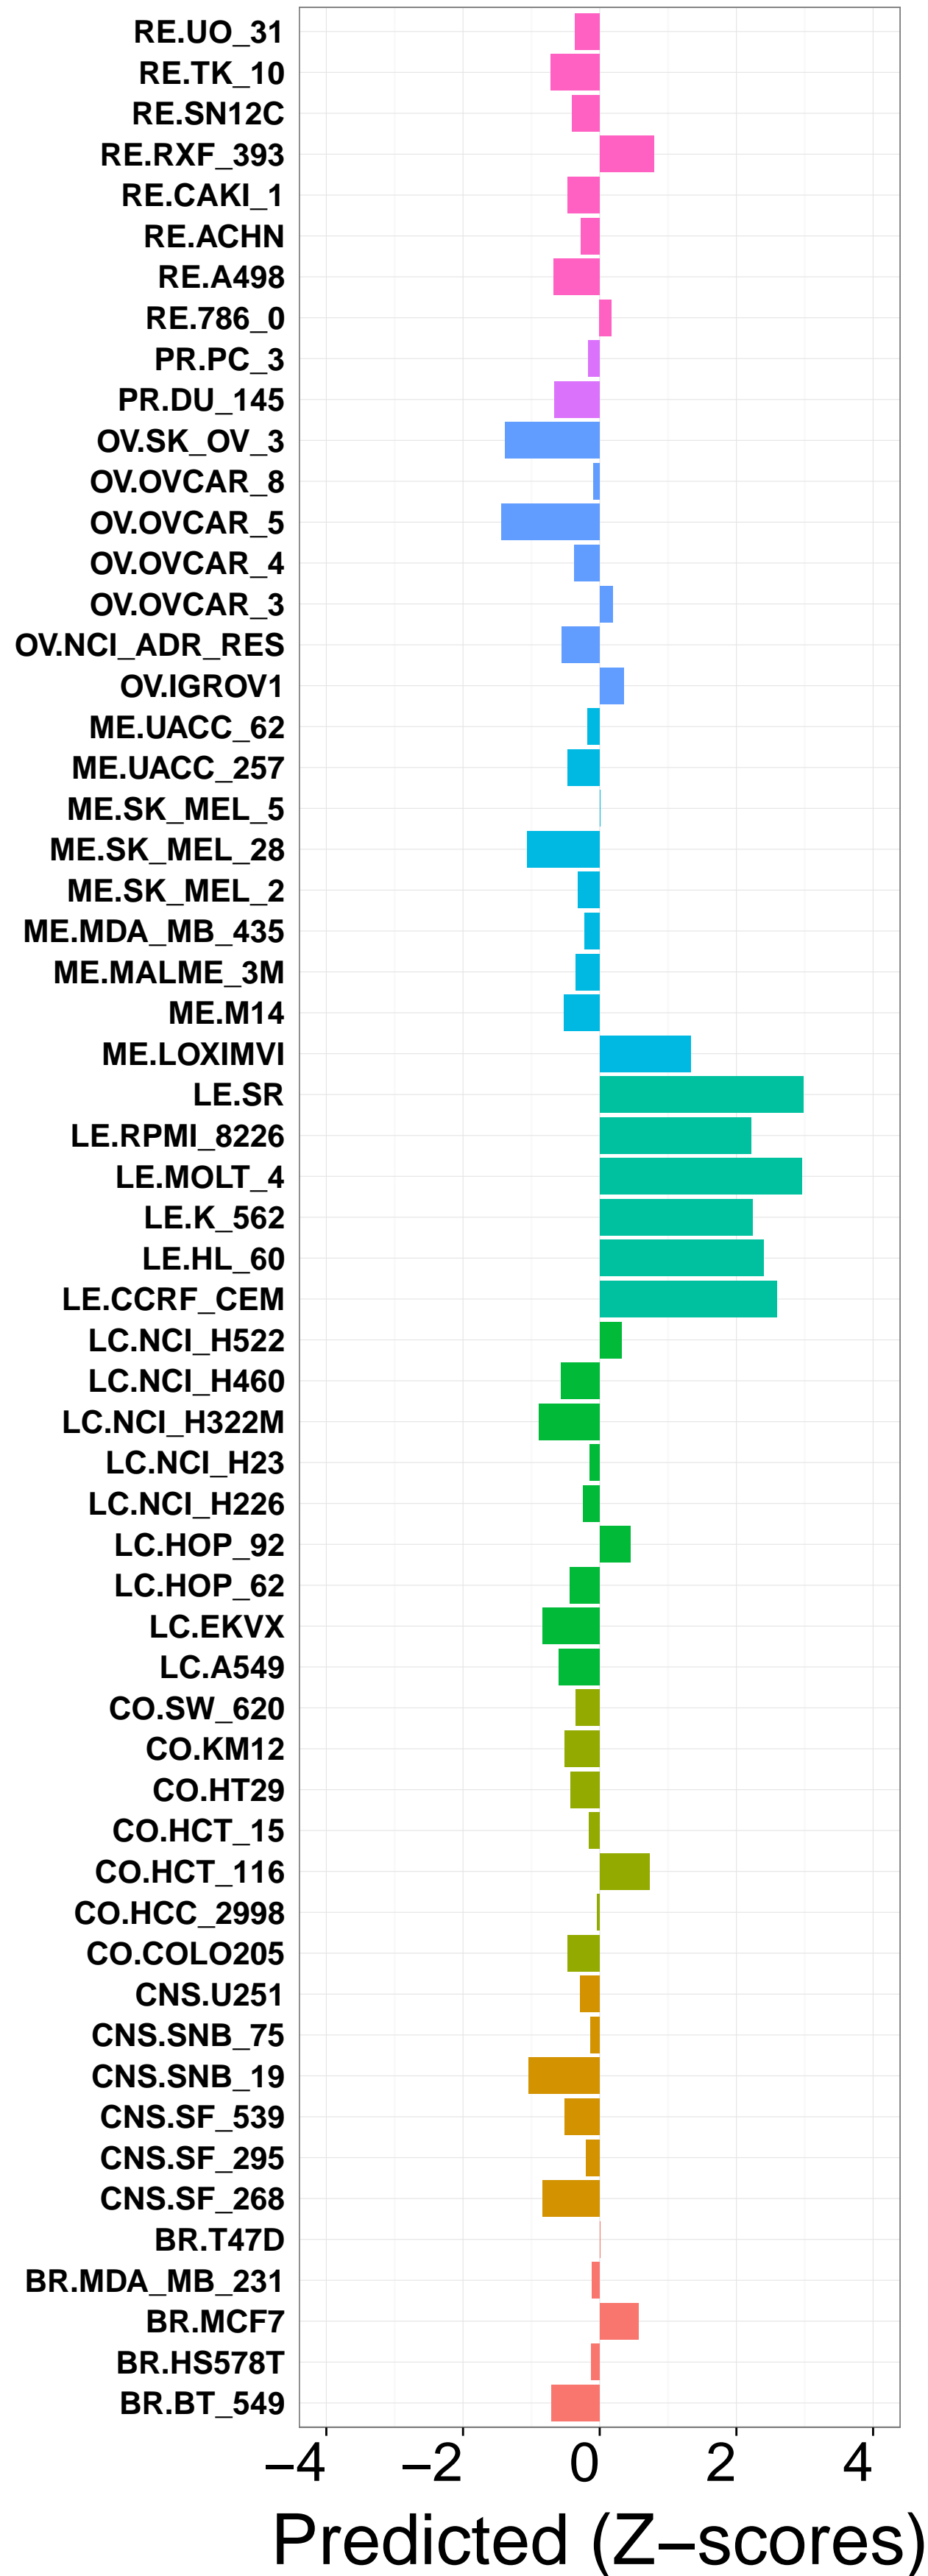

# NSC 673596, (LOCCO)

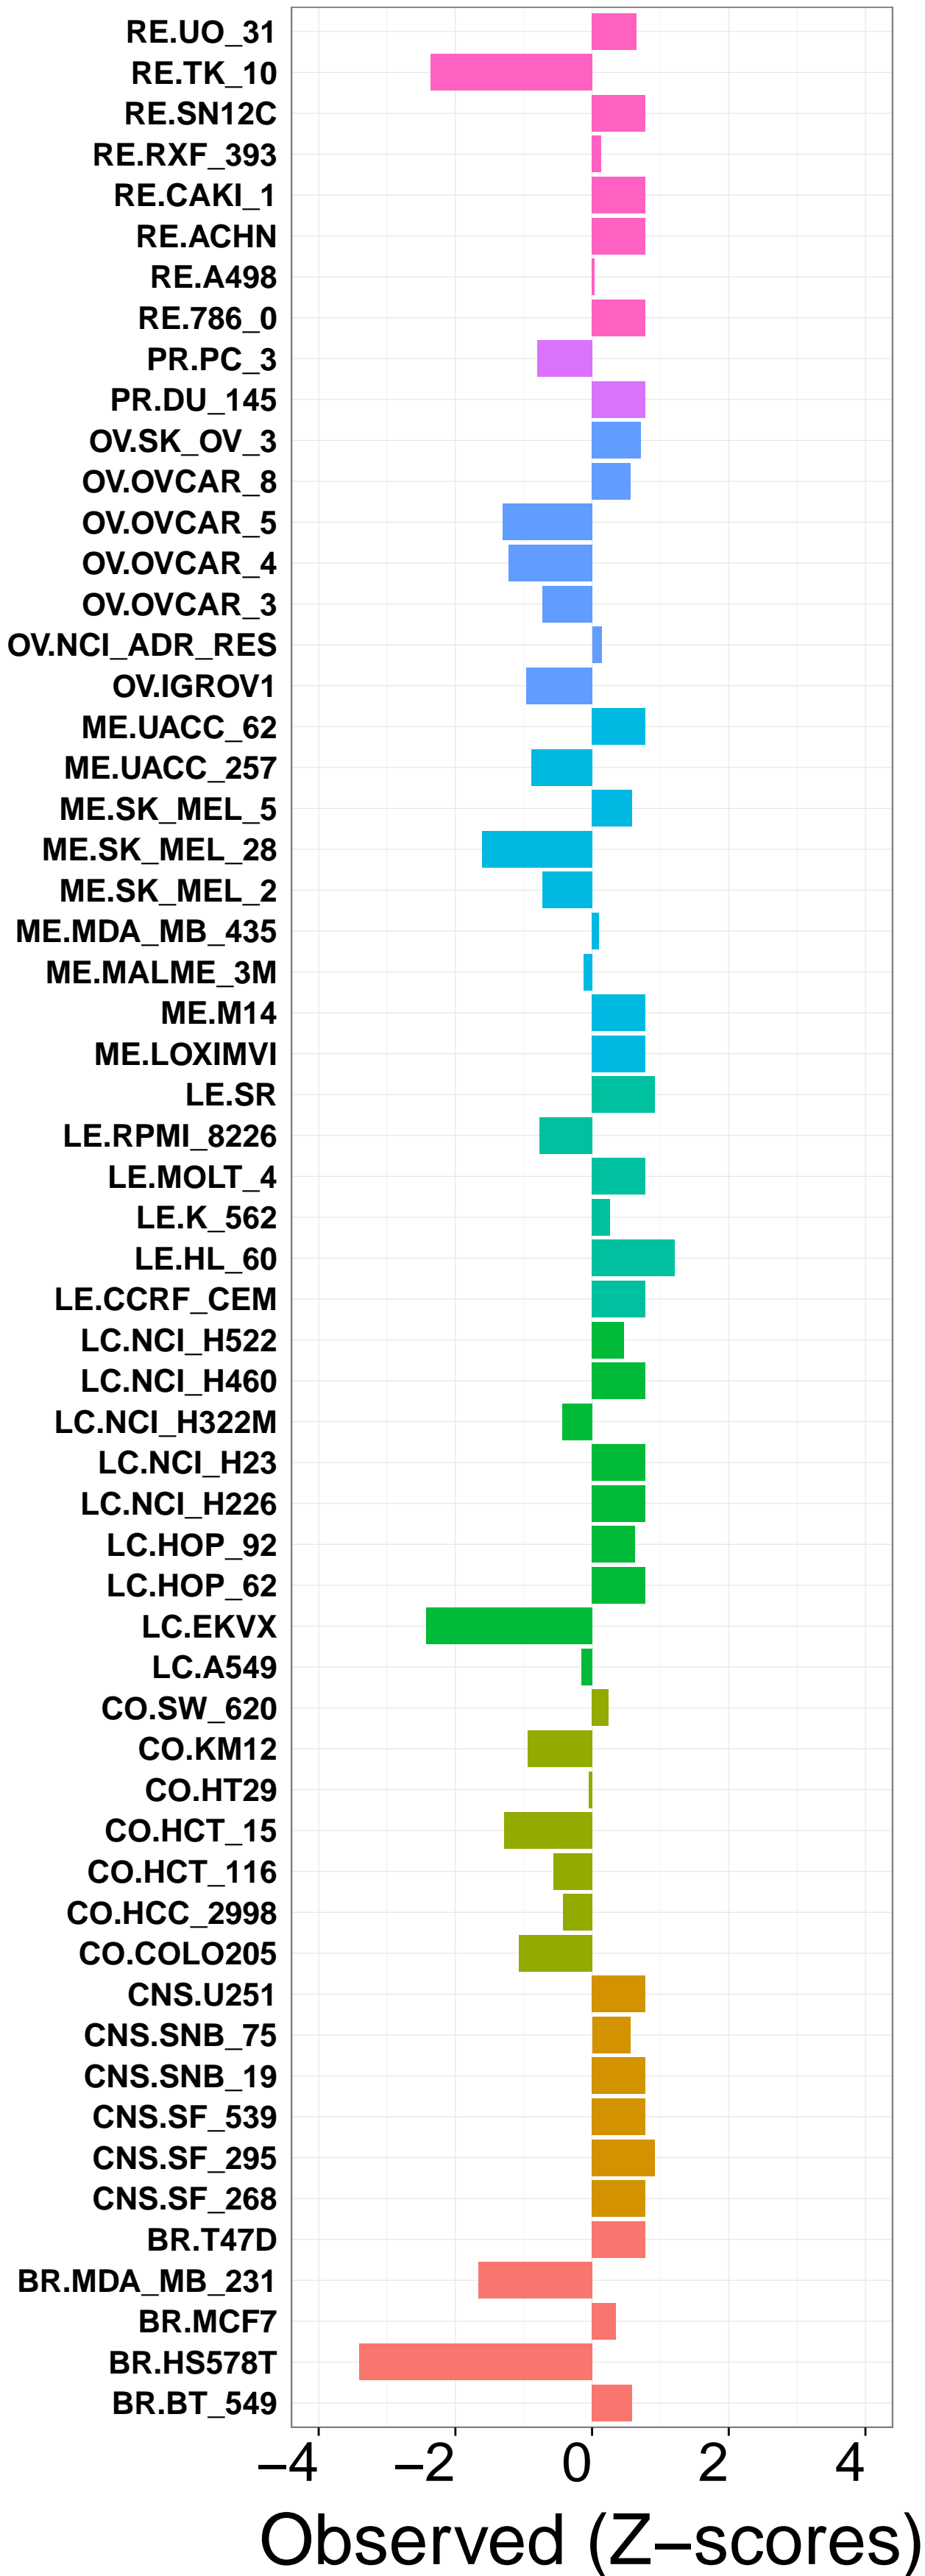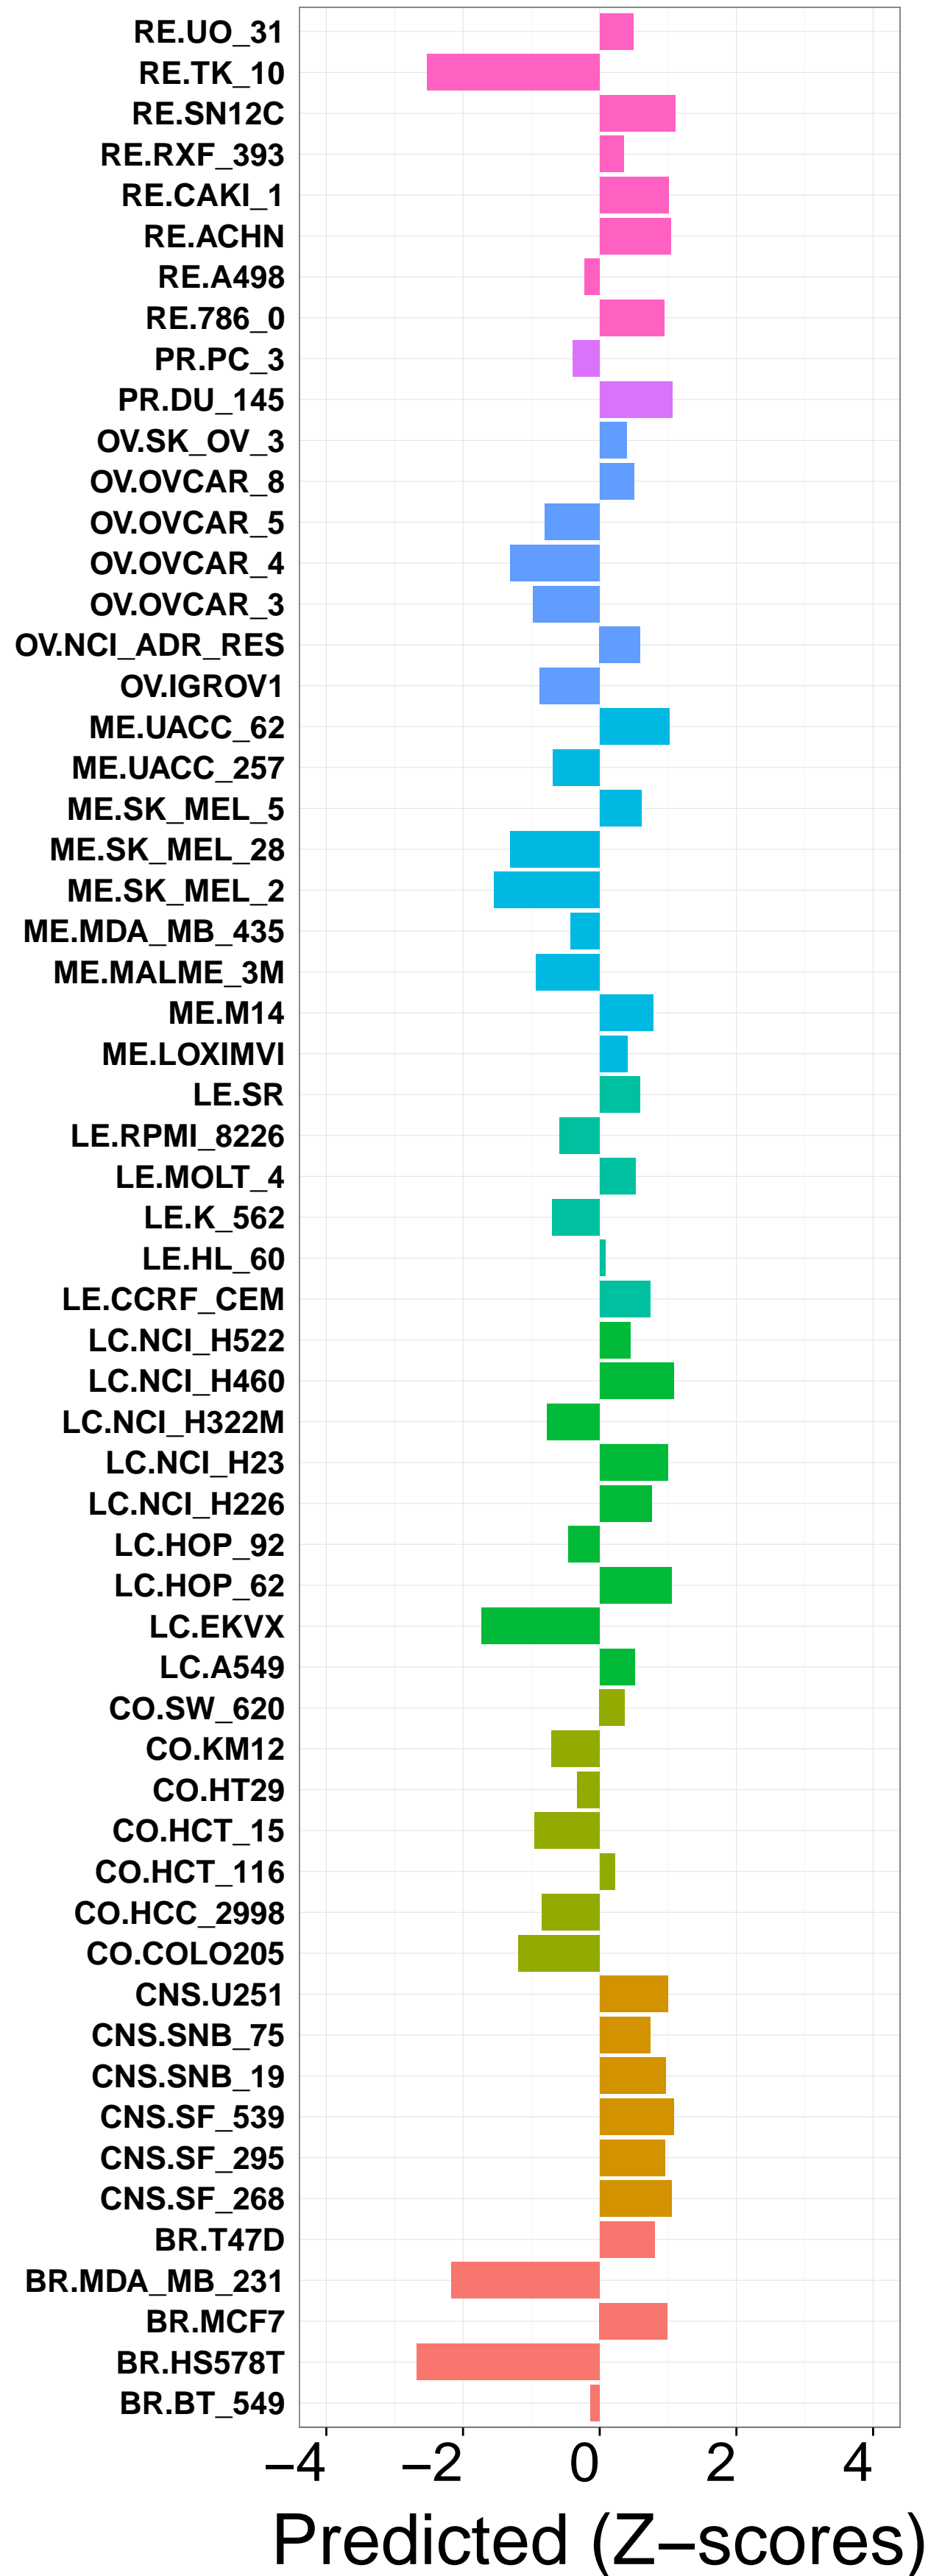



# NSC 686288, (LOCCO)

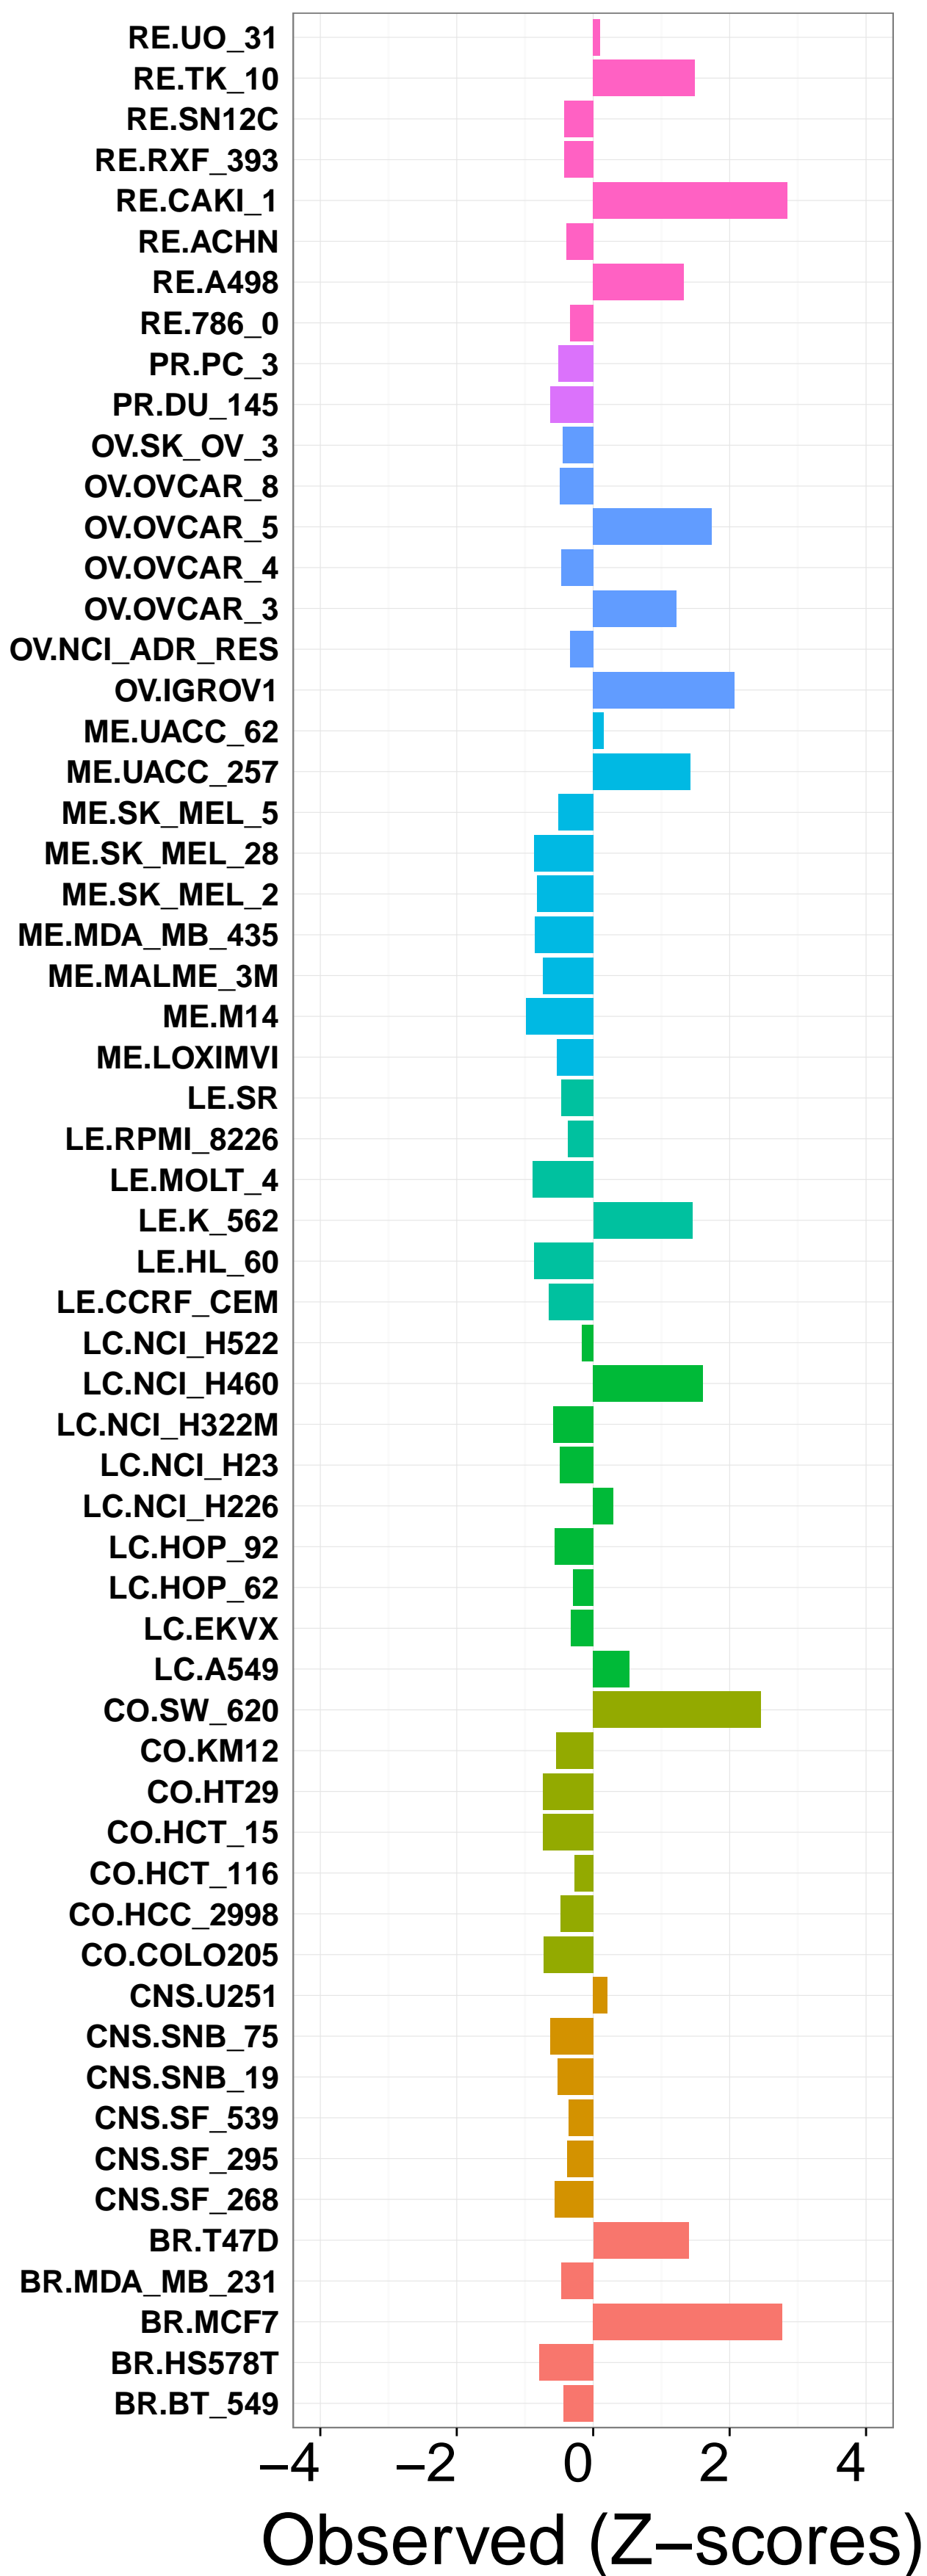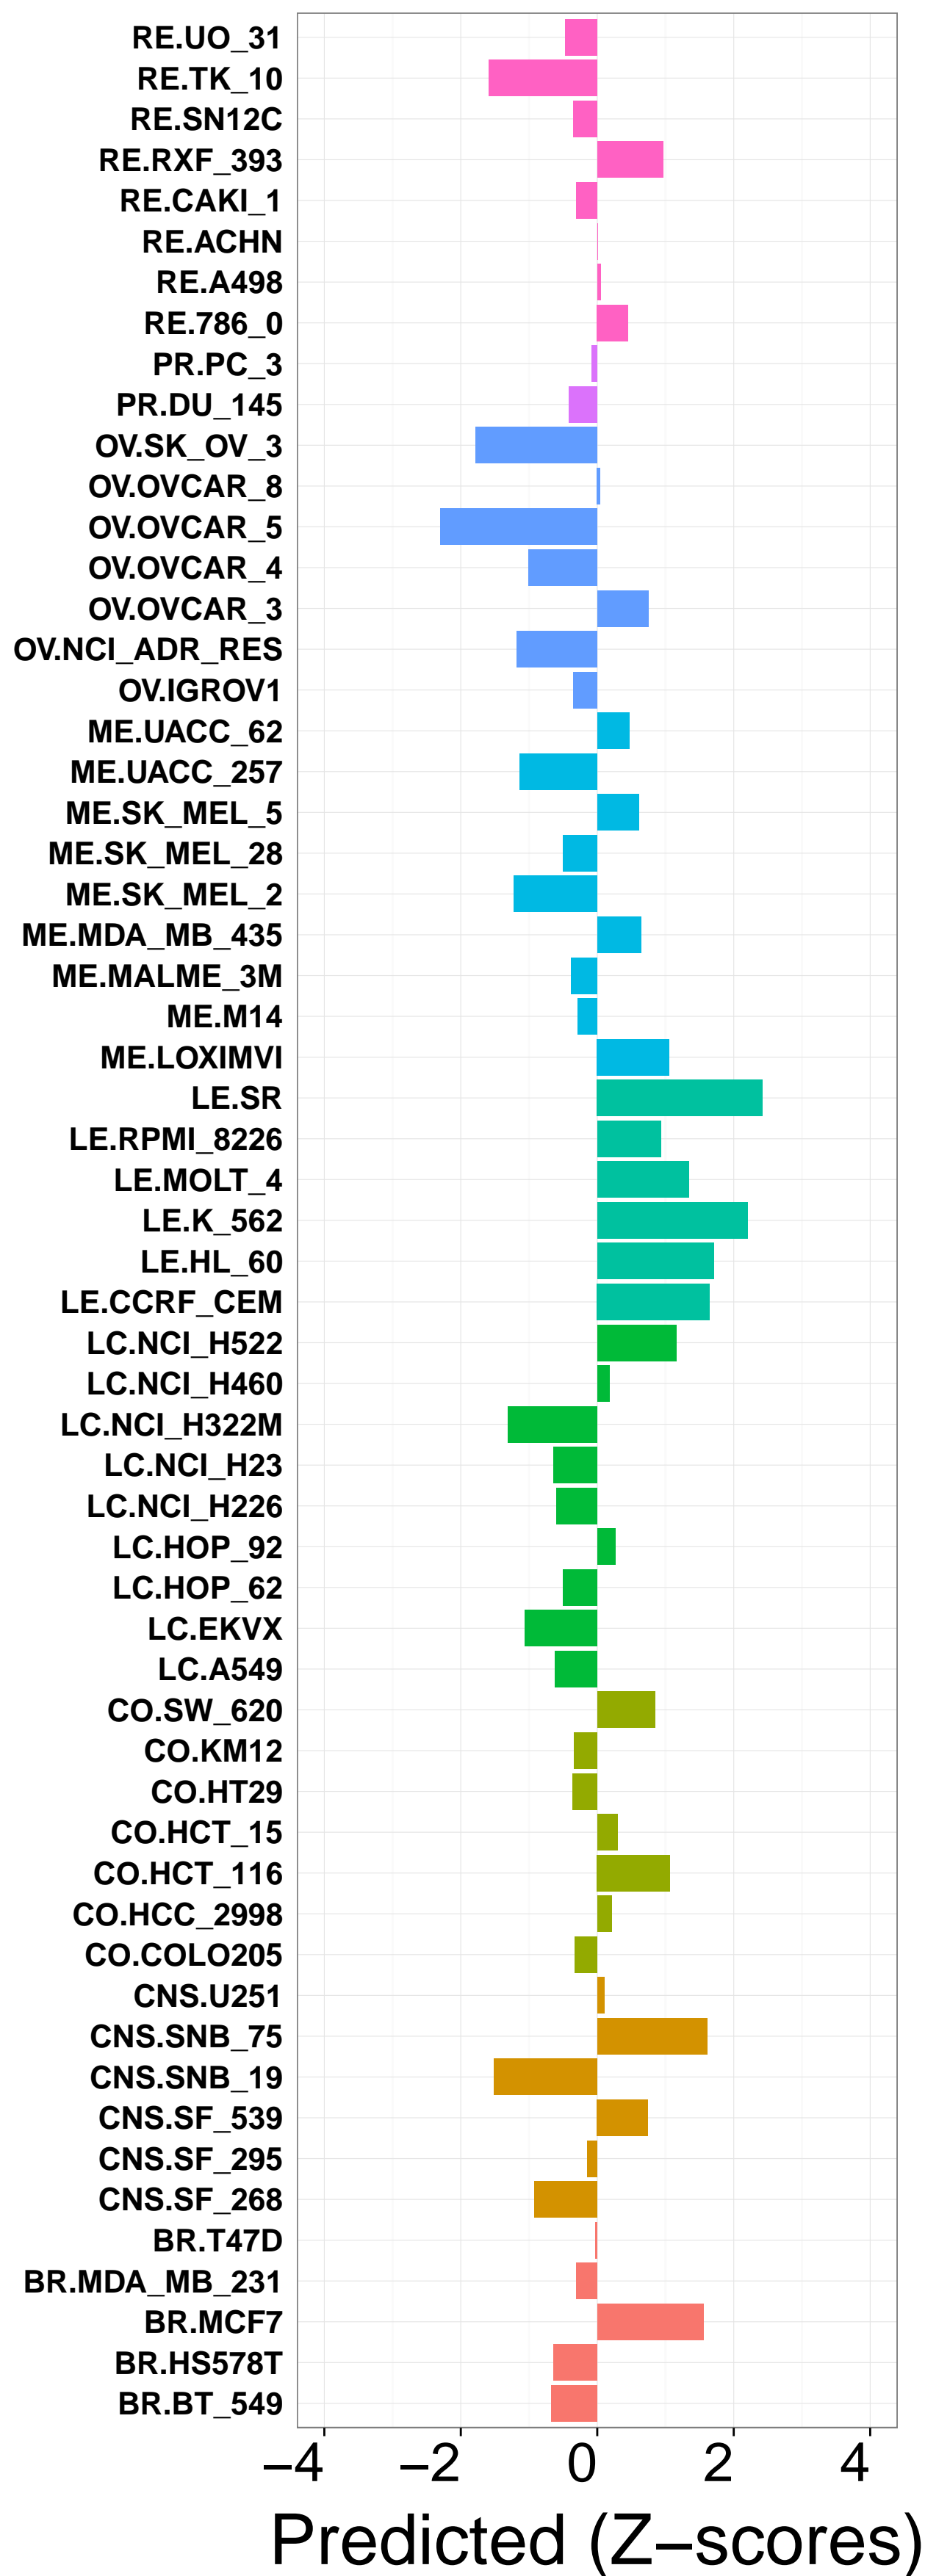

# NSC 698037, (LOCCO)

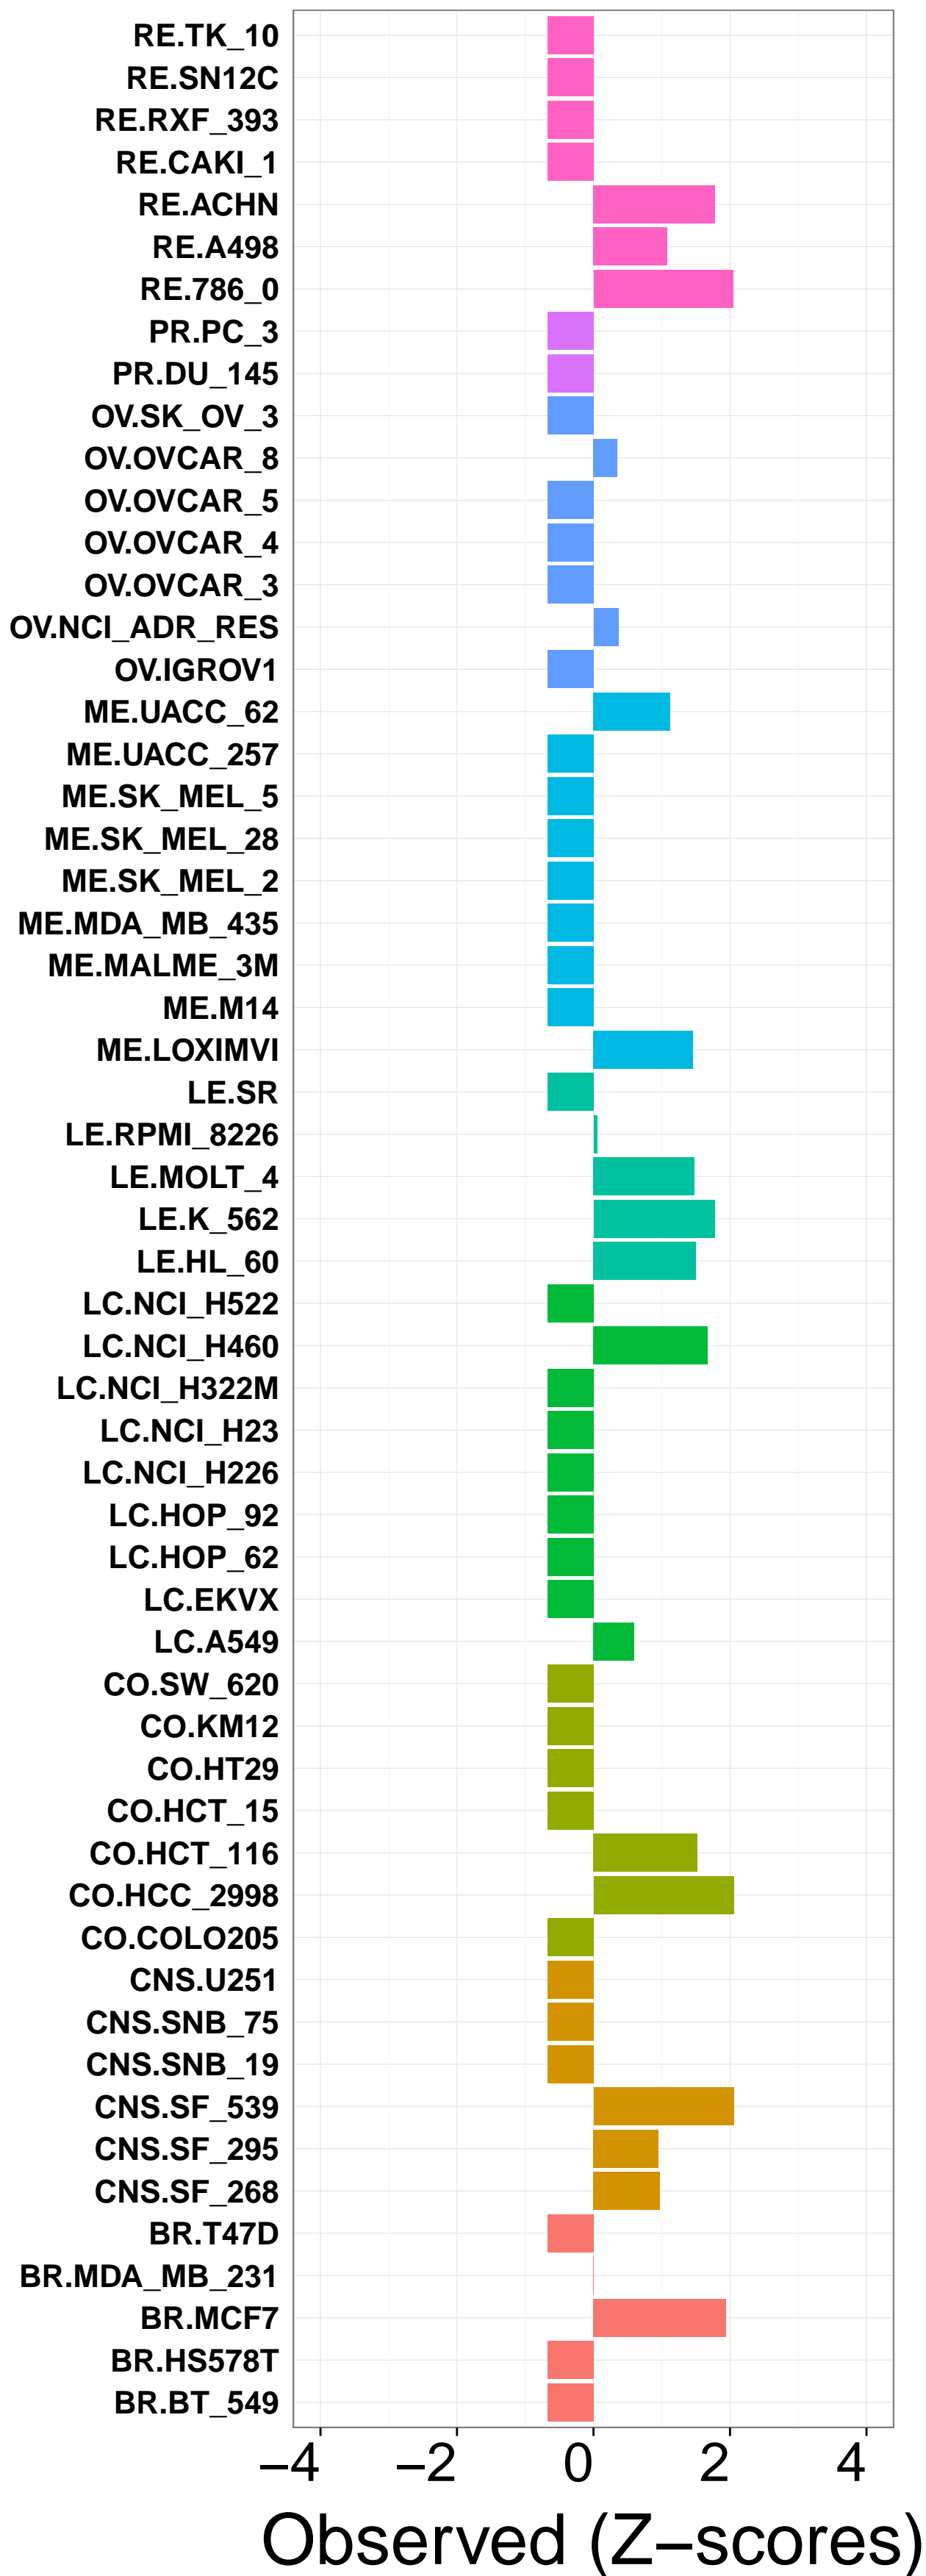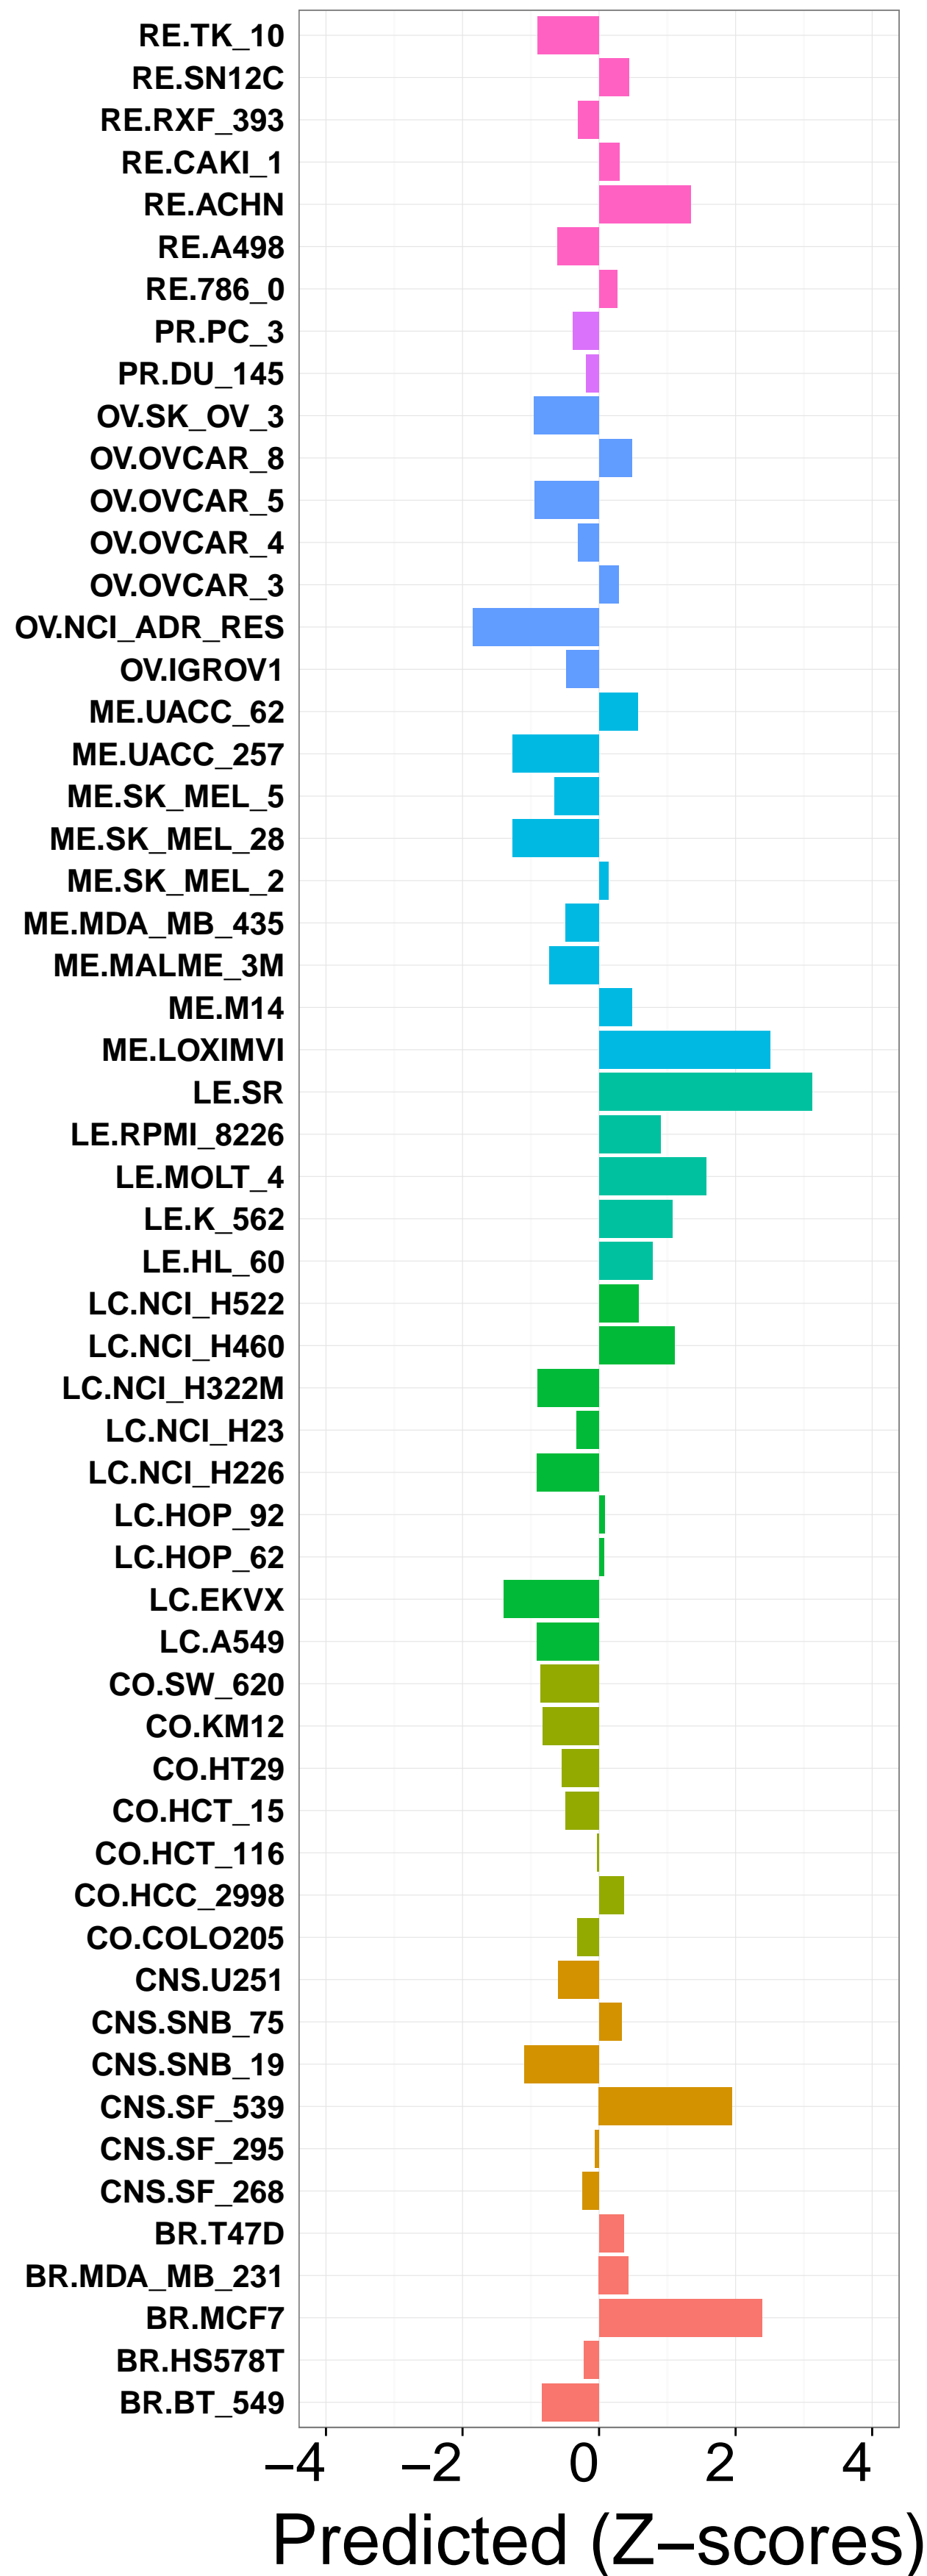

# NSC 707545, Alvespimycin (LOCCO)

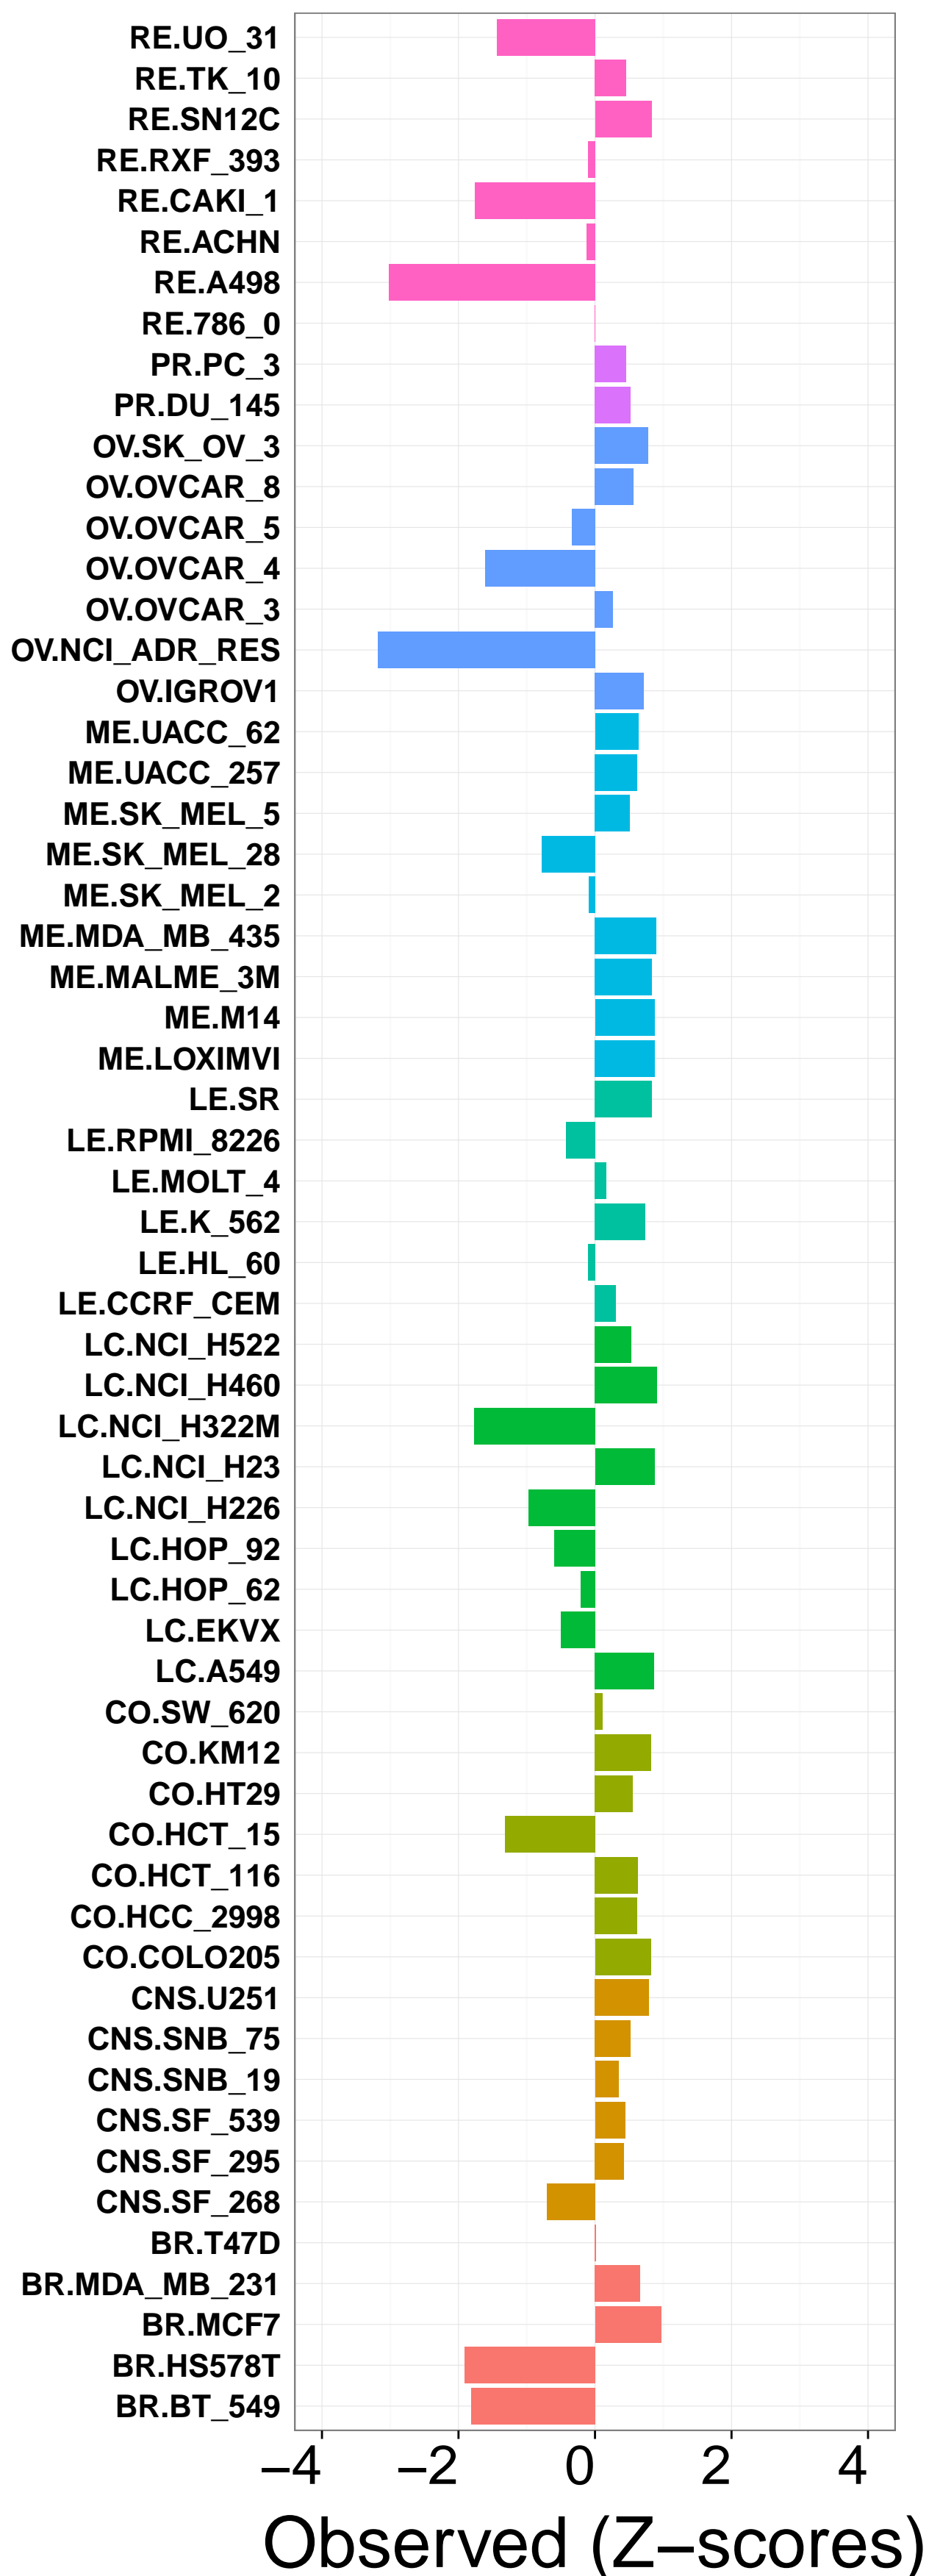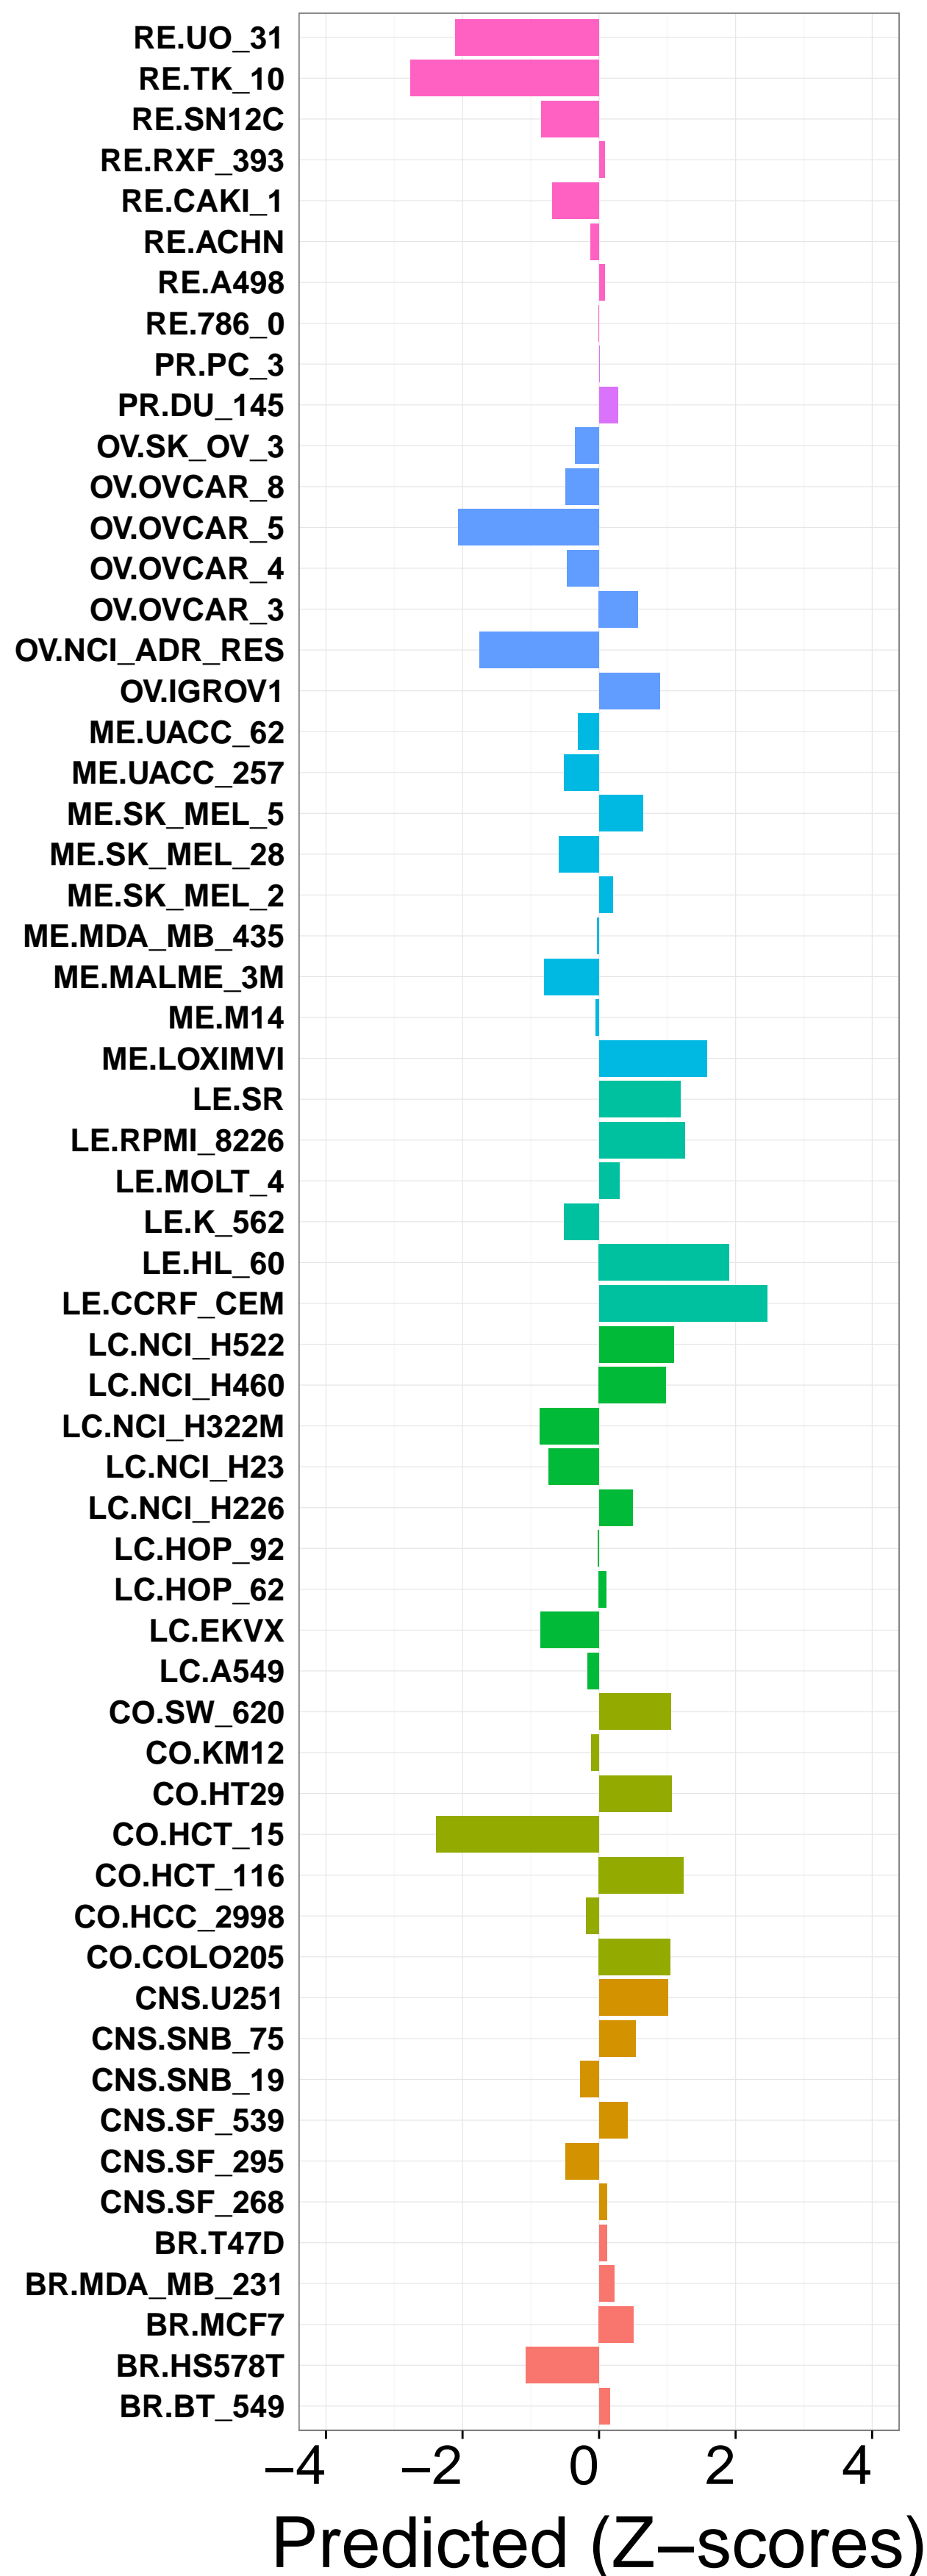

# NSC 710297, OMDPI (LOCCO)

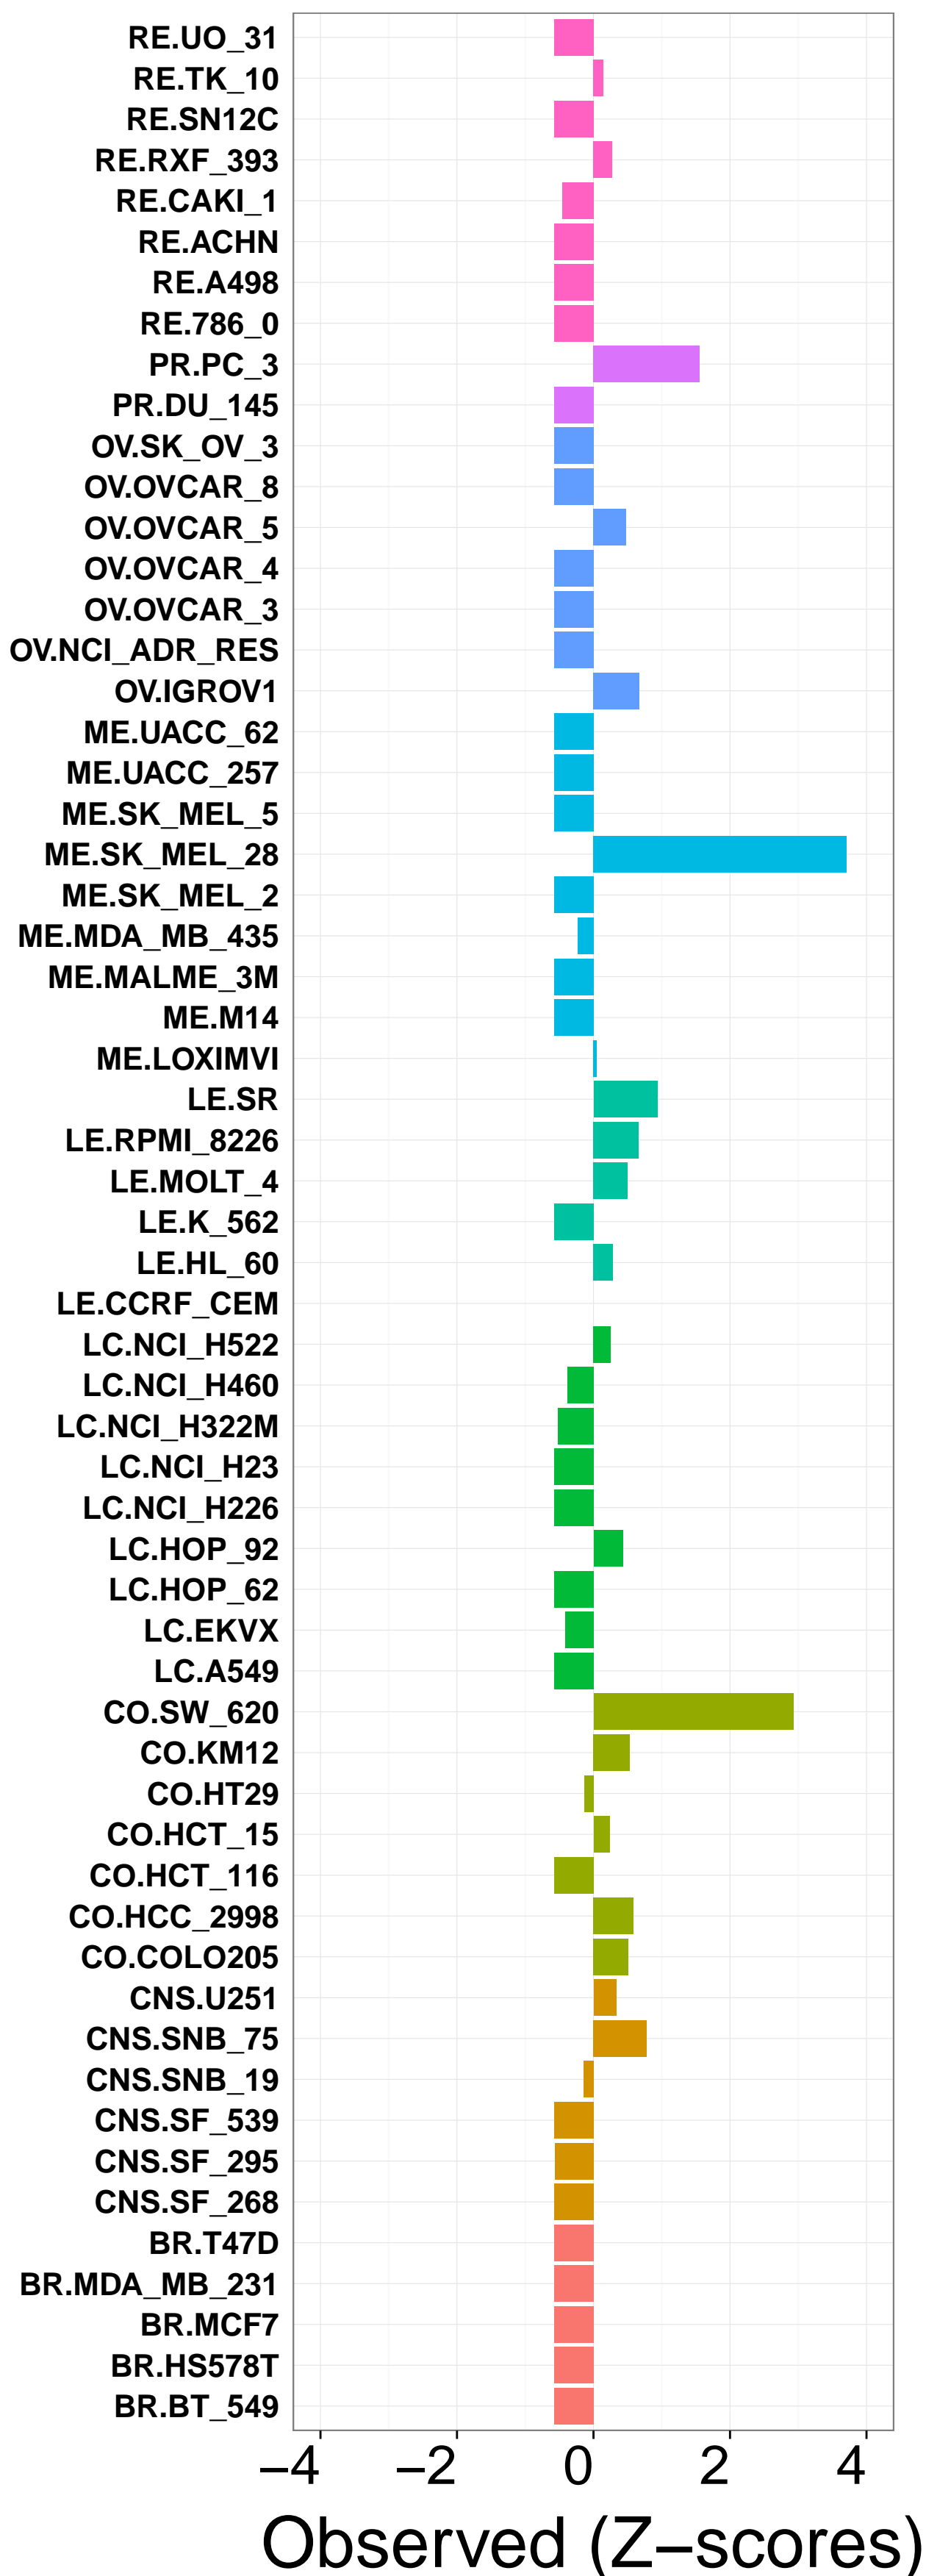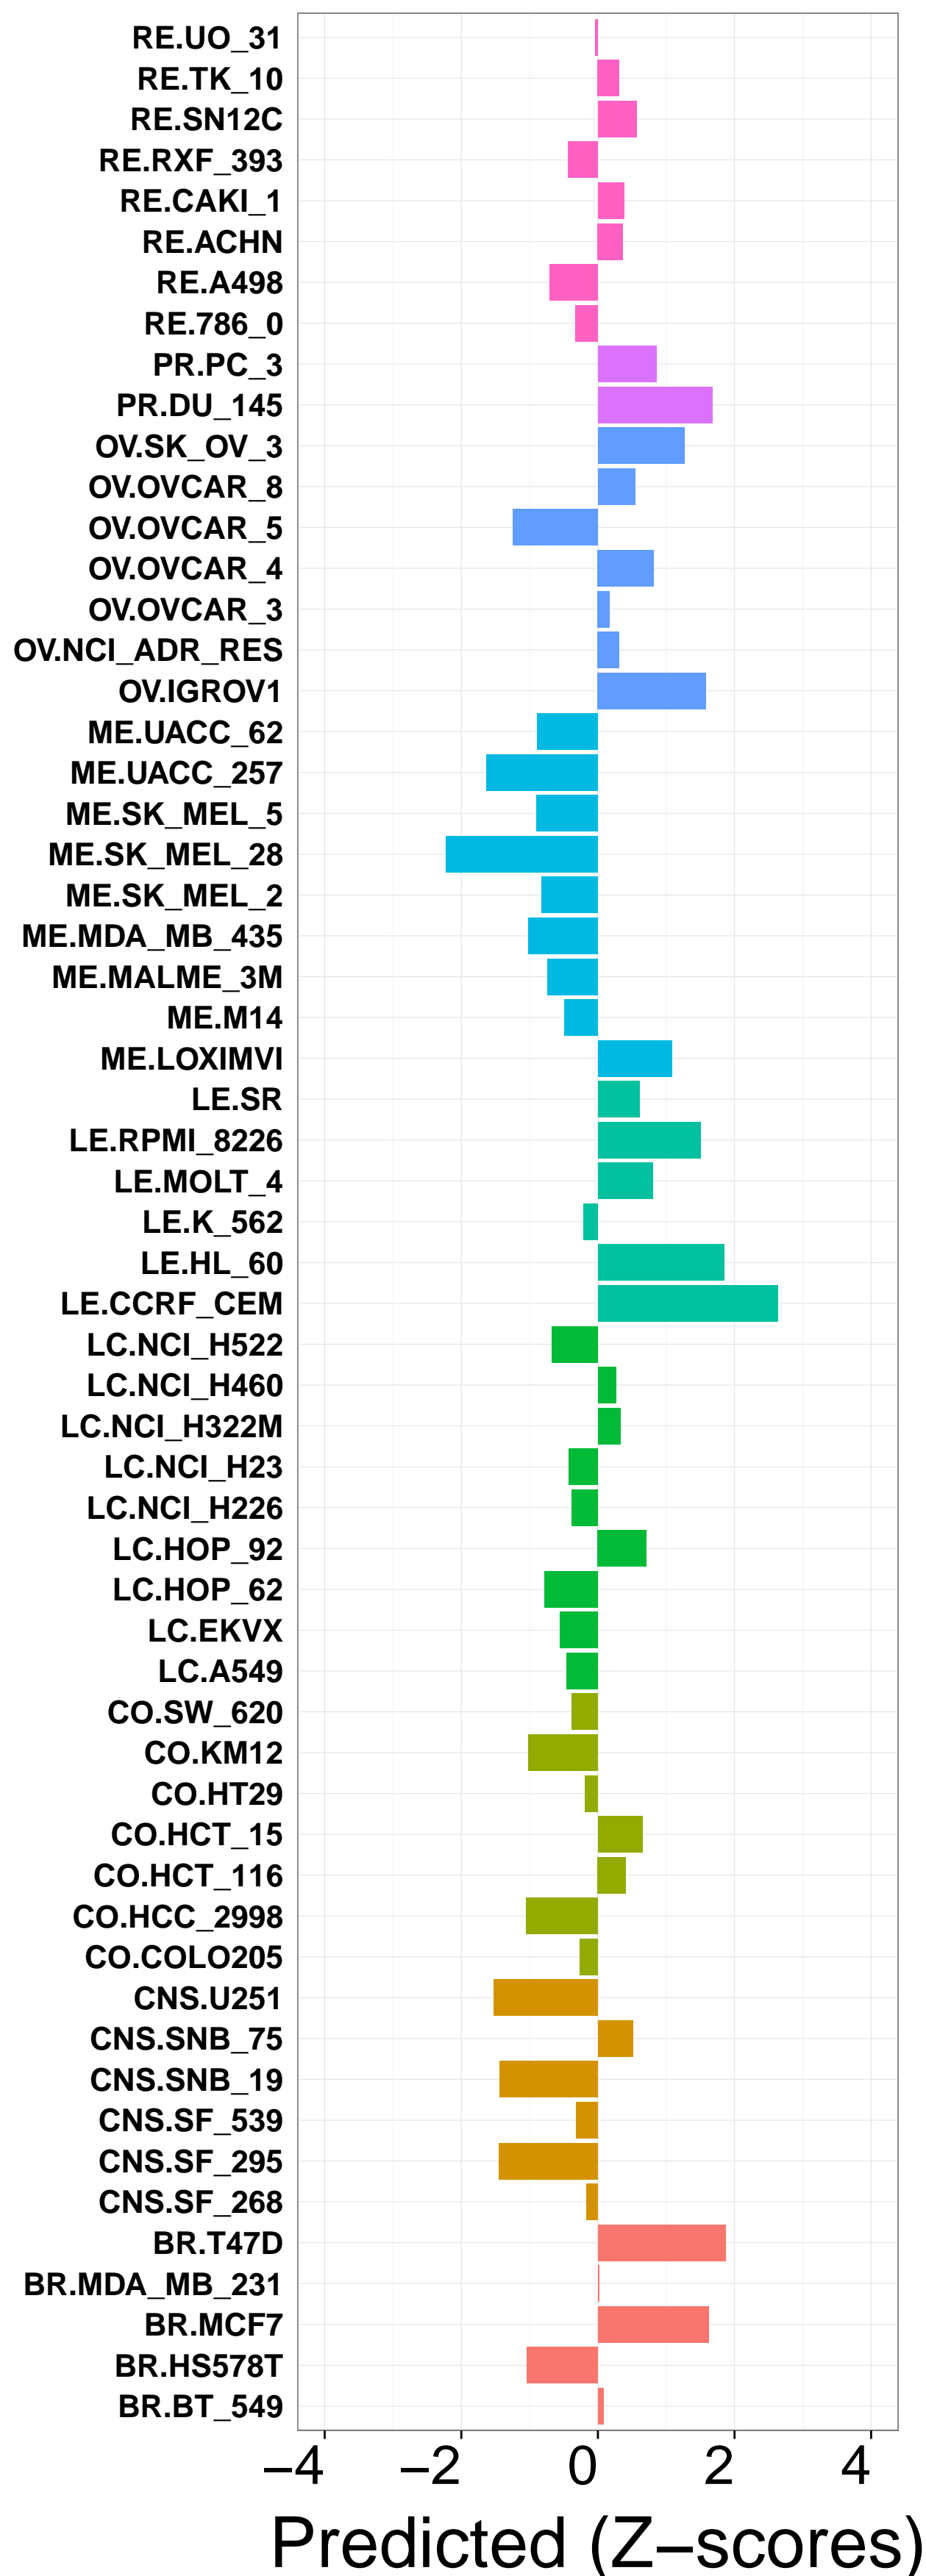

# NSC 710464, (LOCCO)

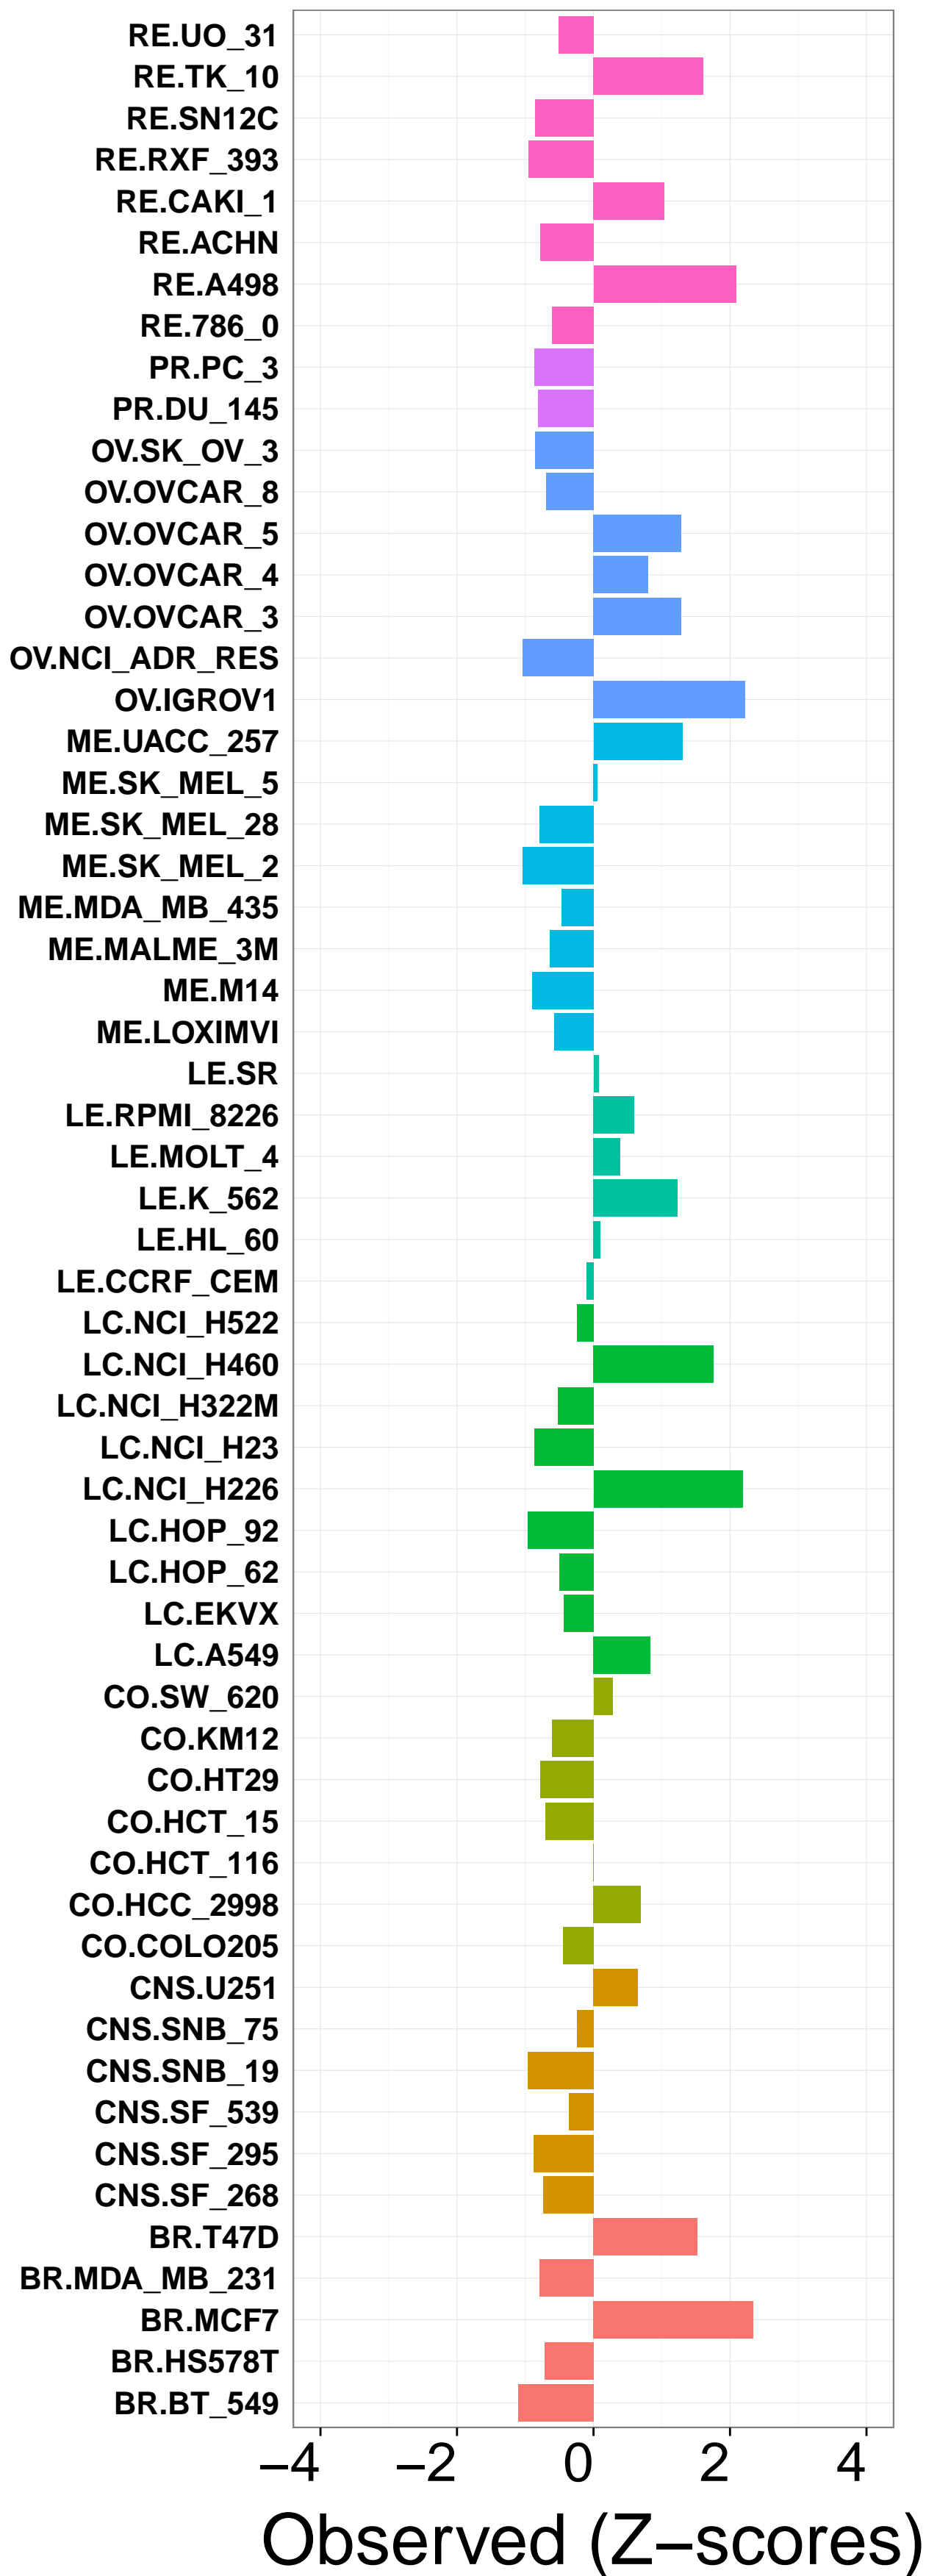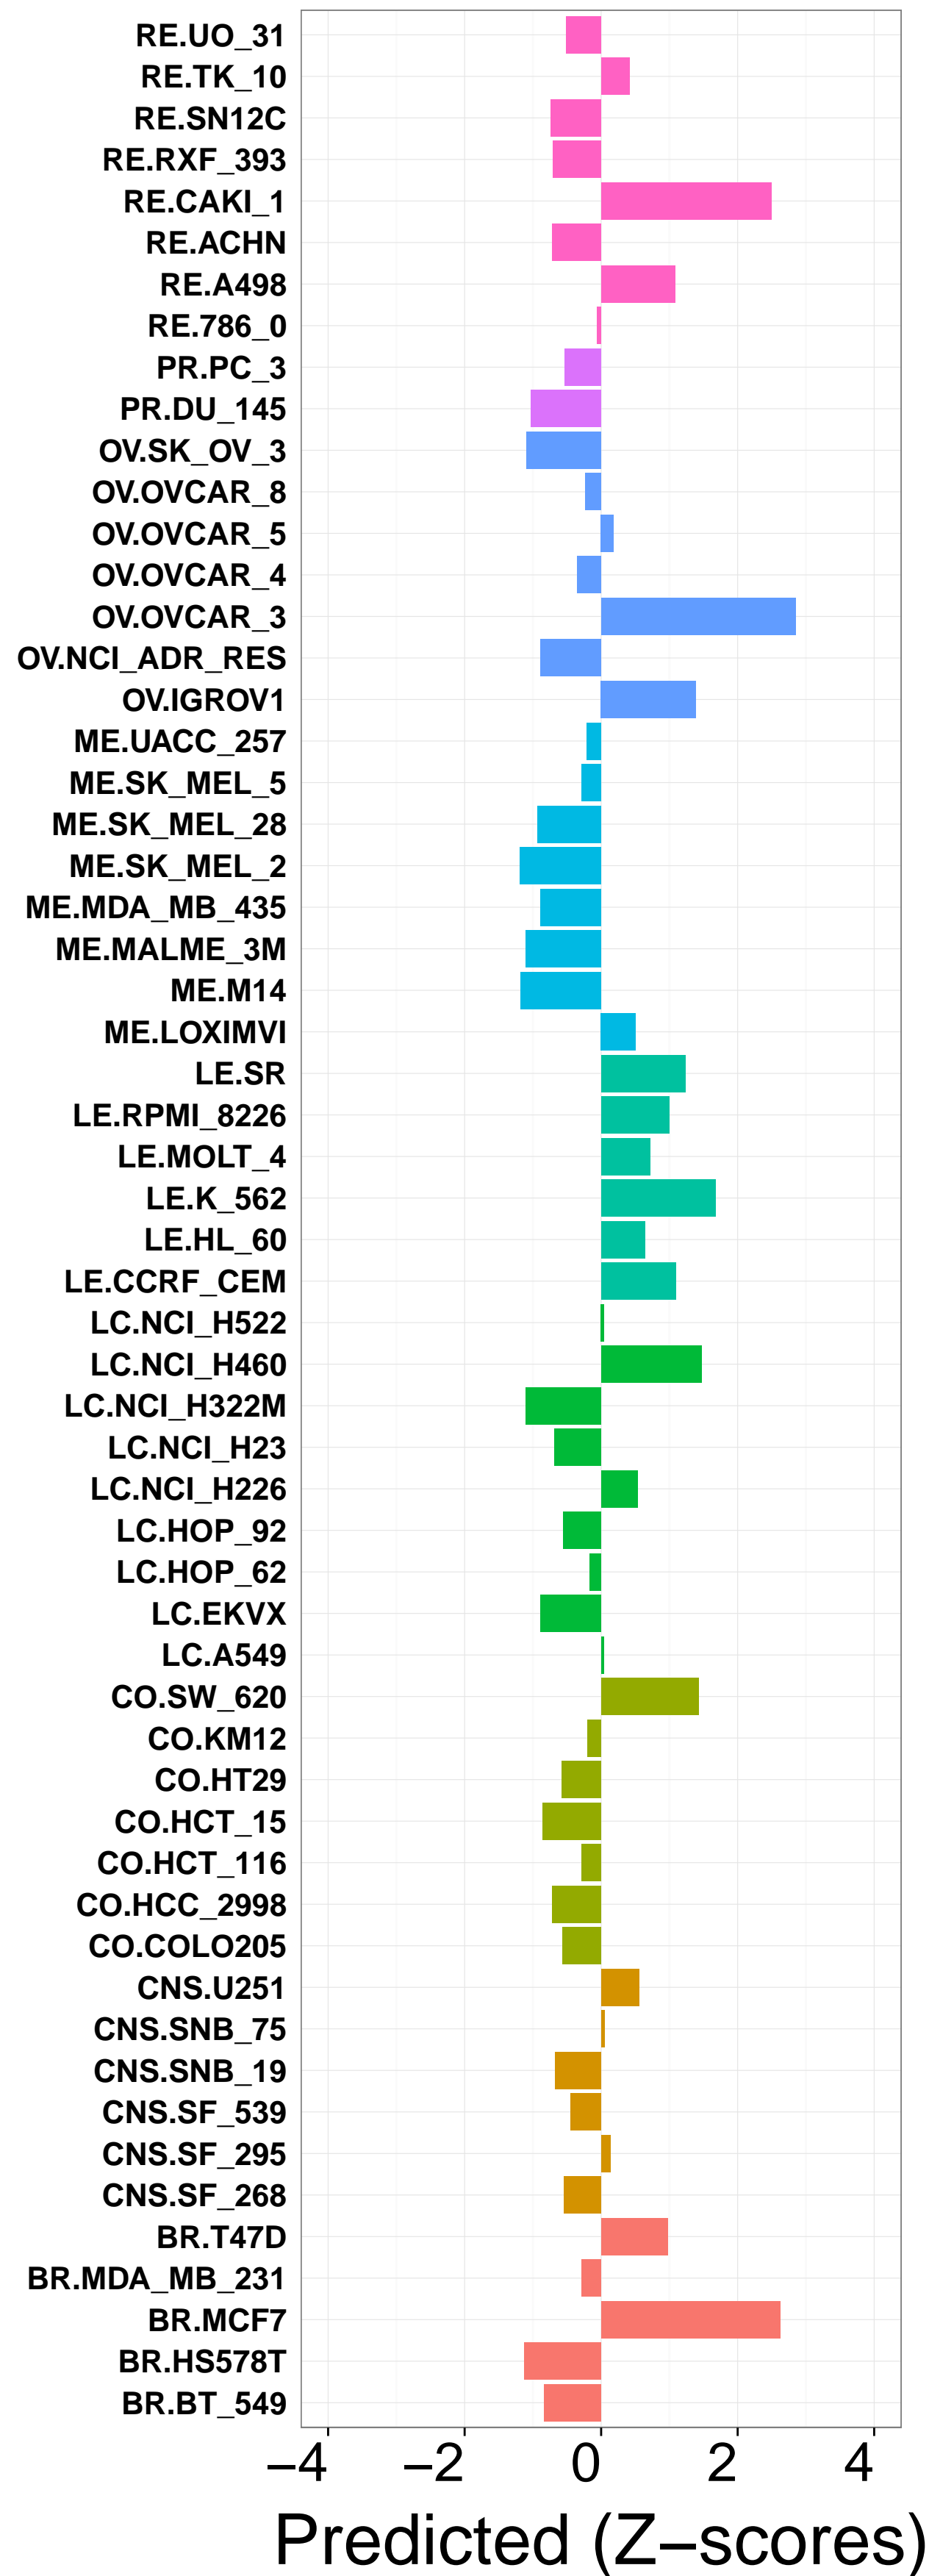



# NSC 715055, Gefitinib (LOCCO)

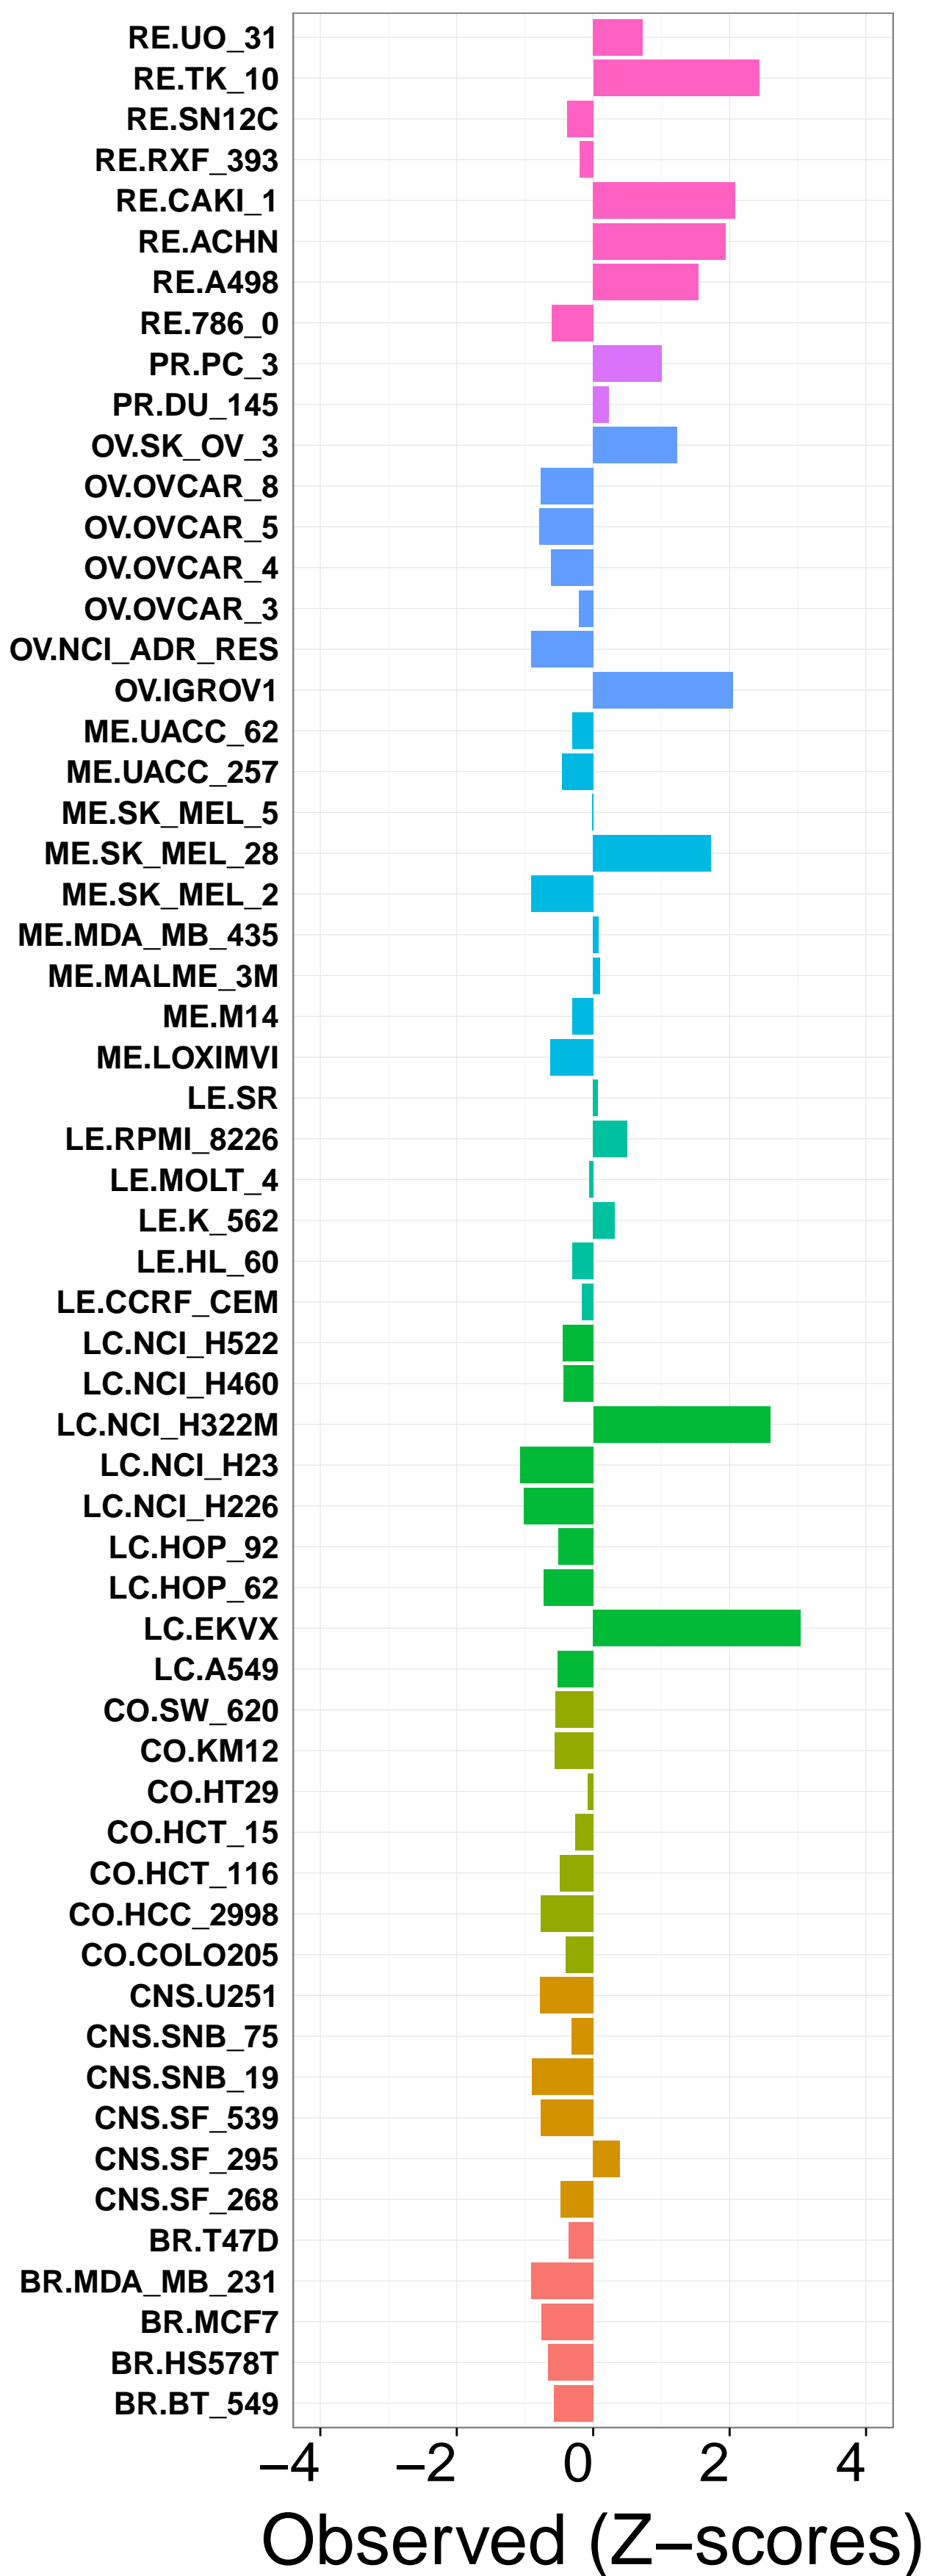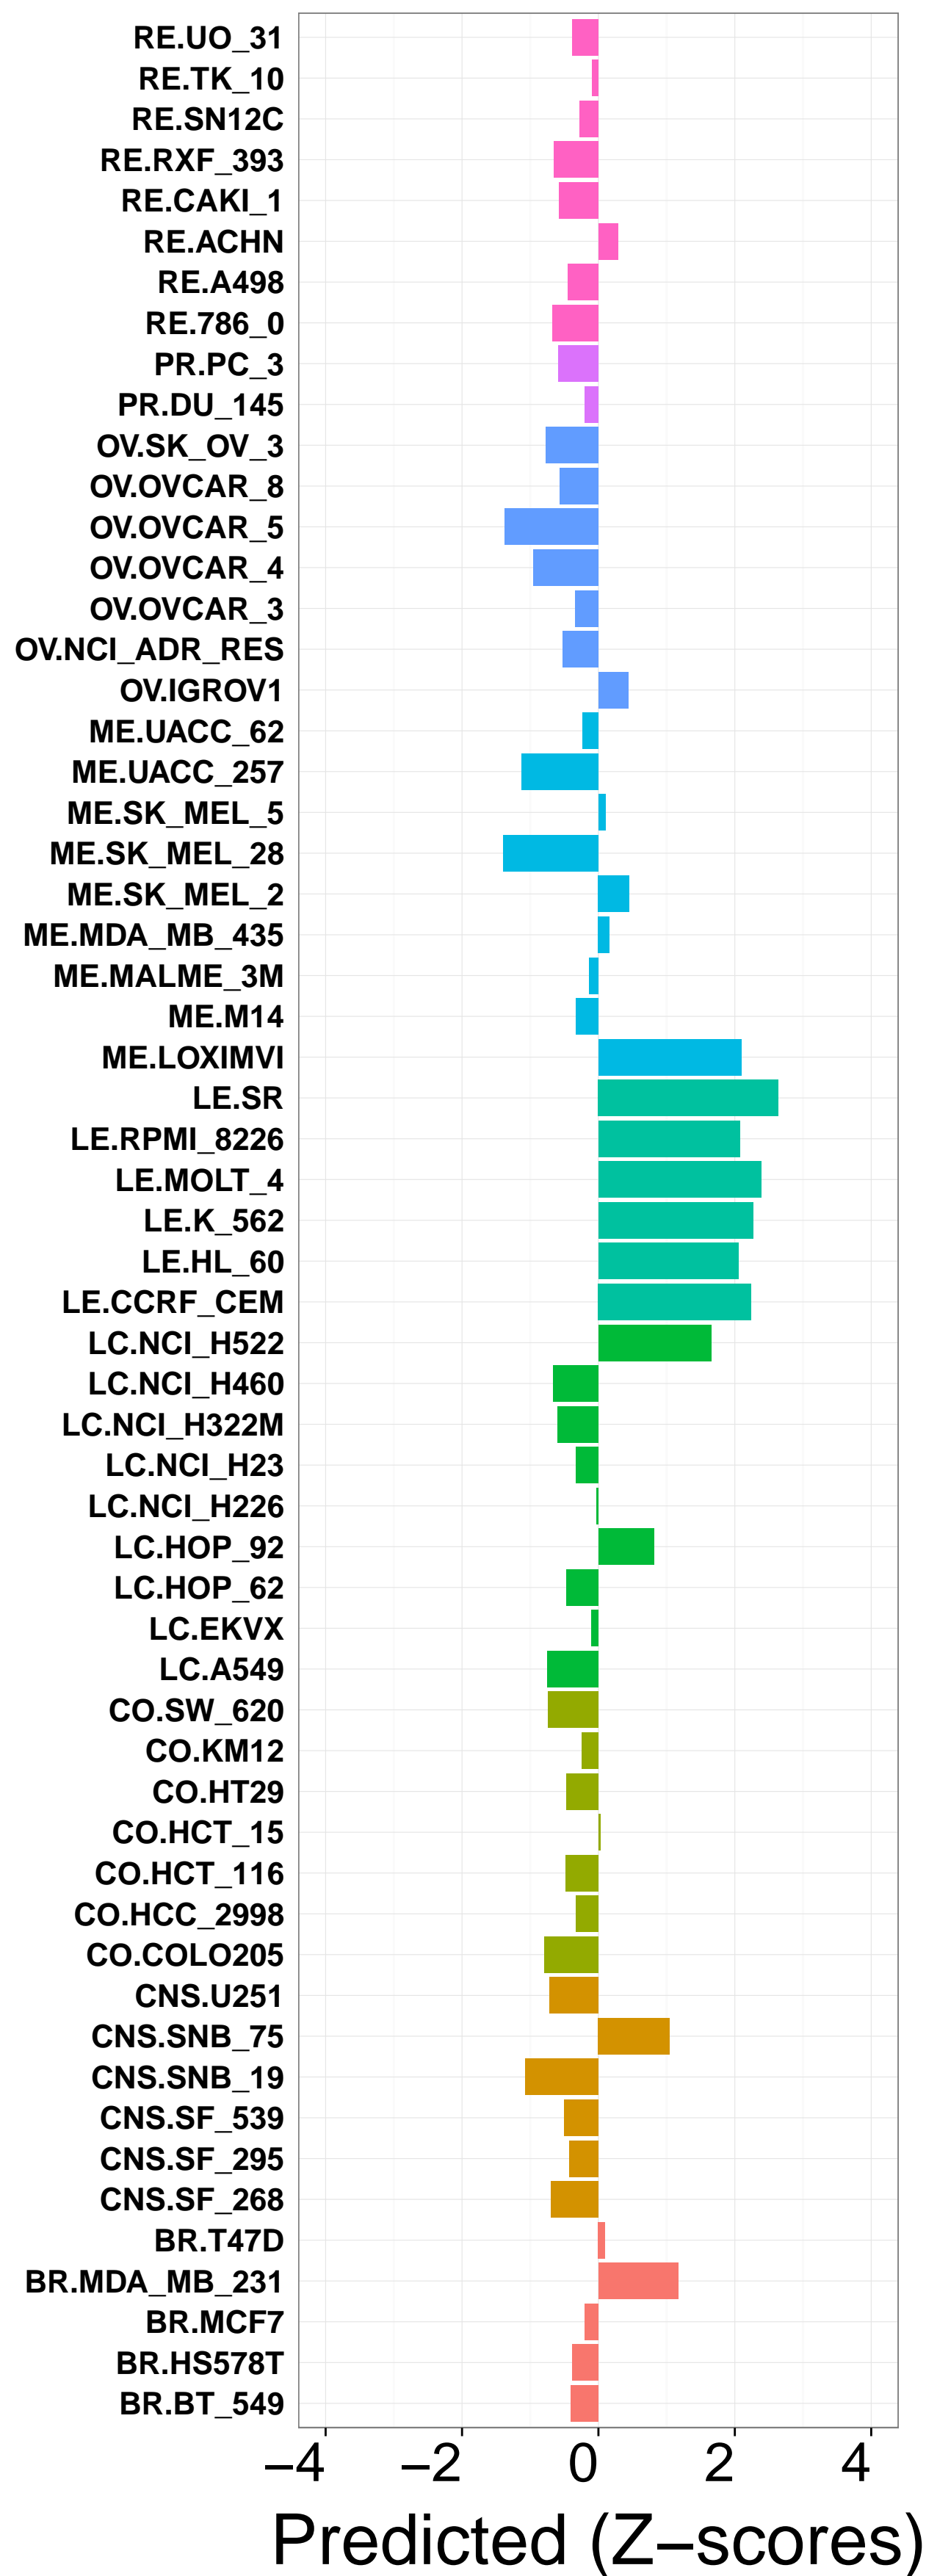

# NSC 718781, (LOCCO)

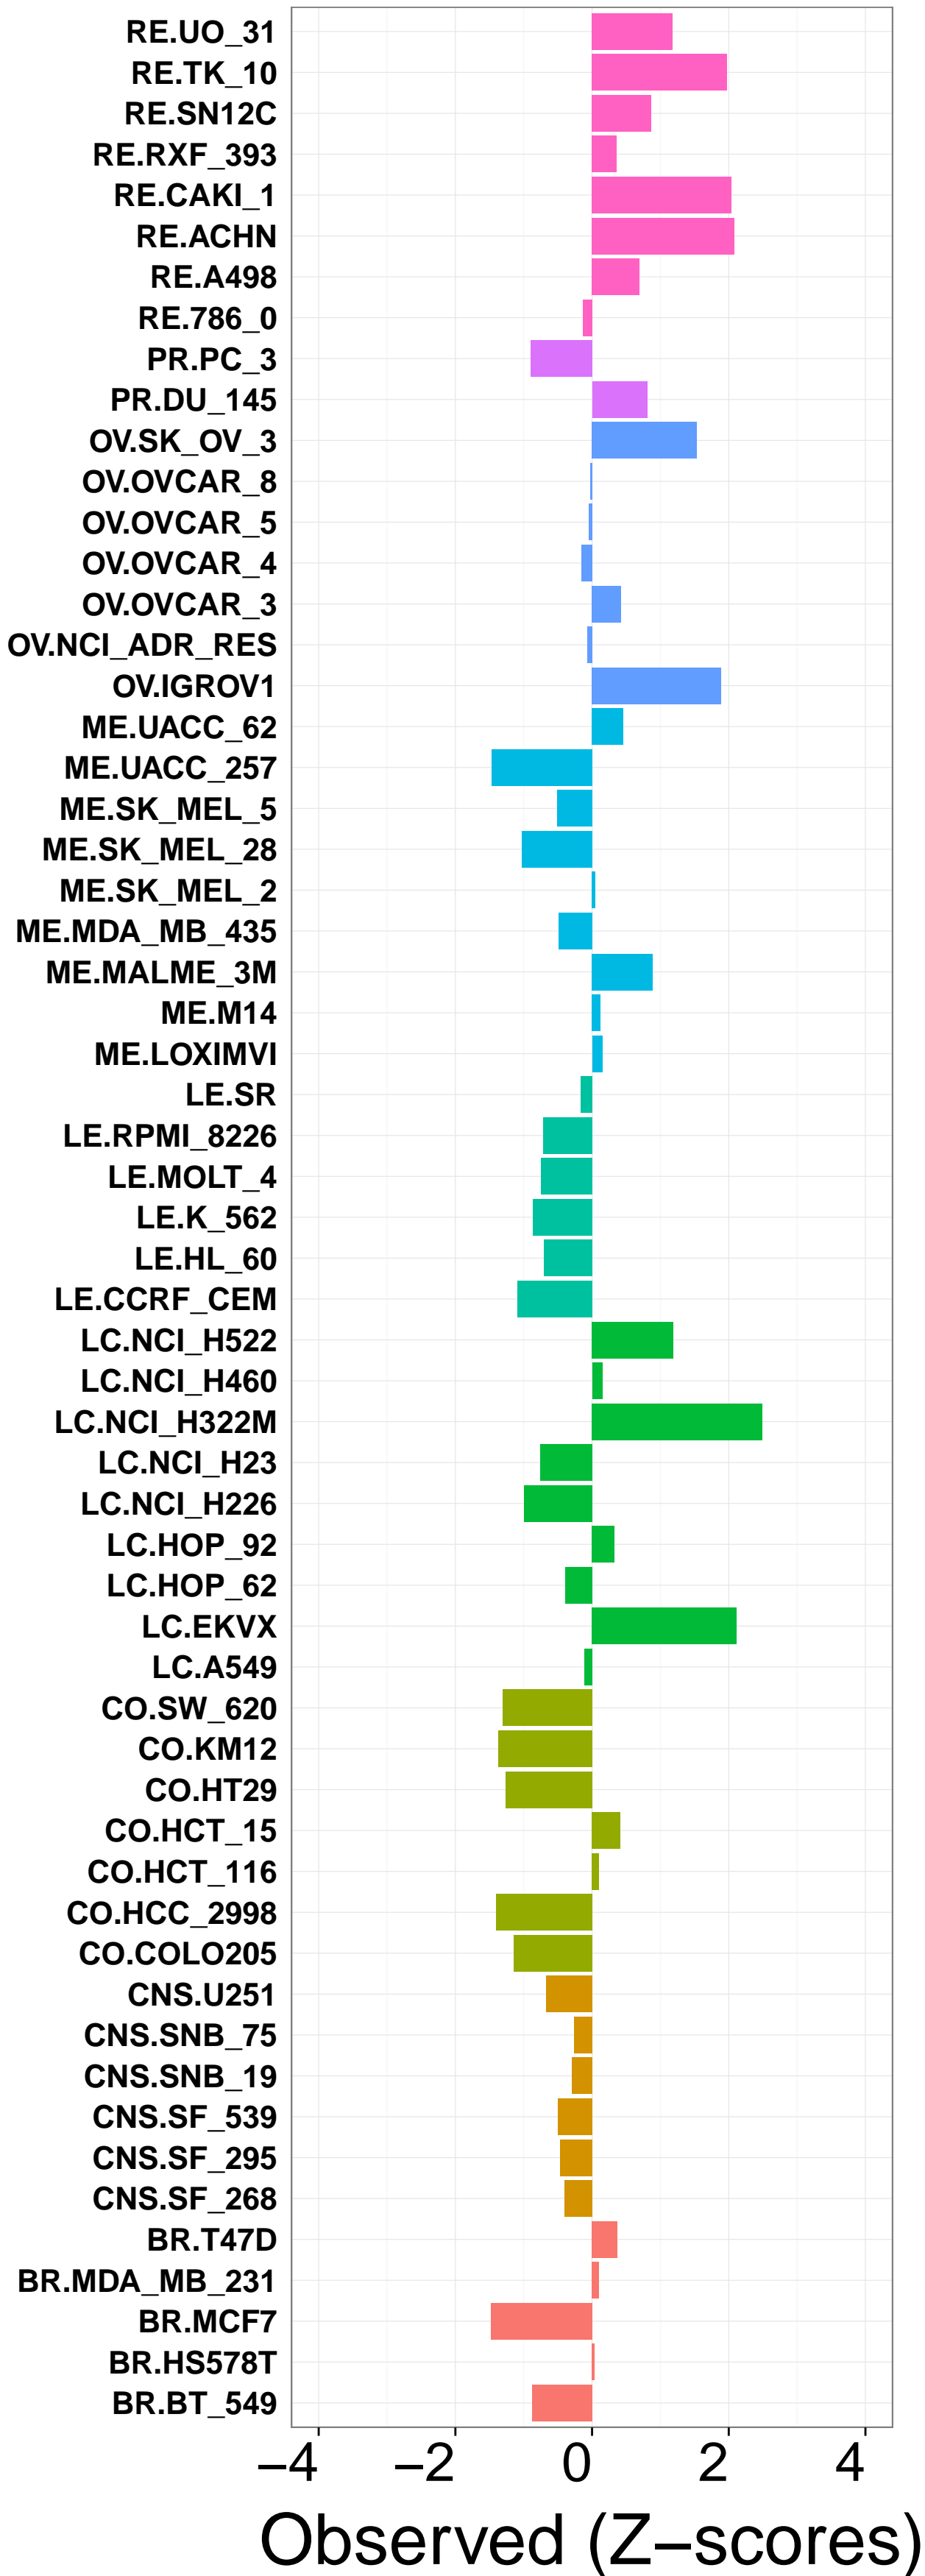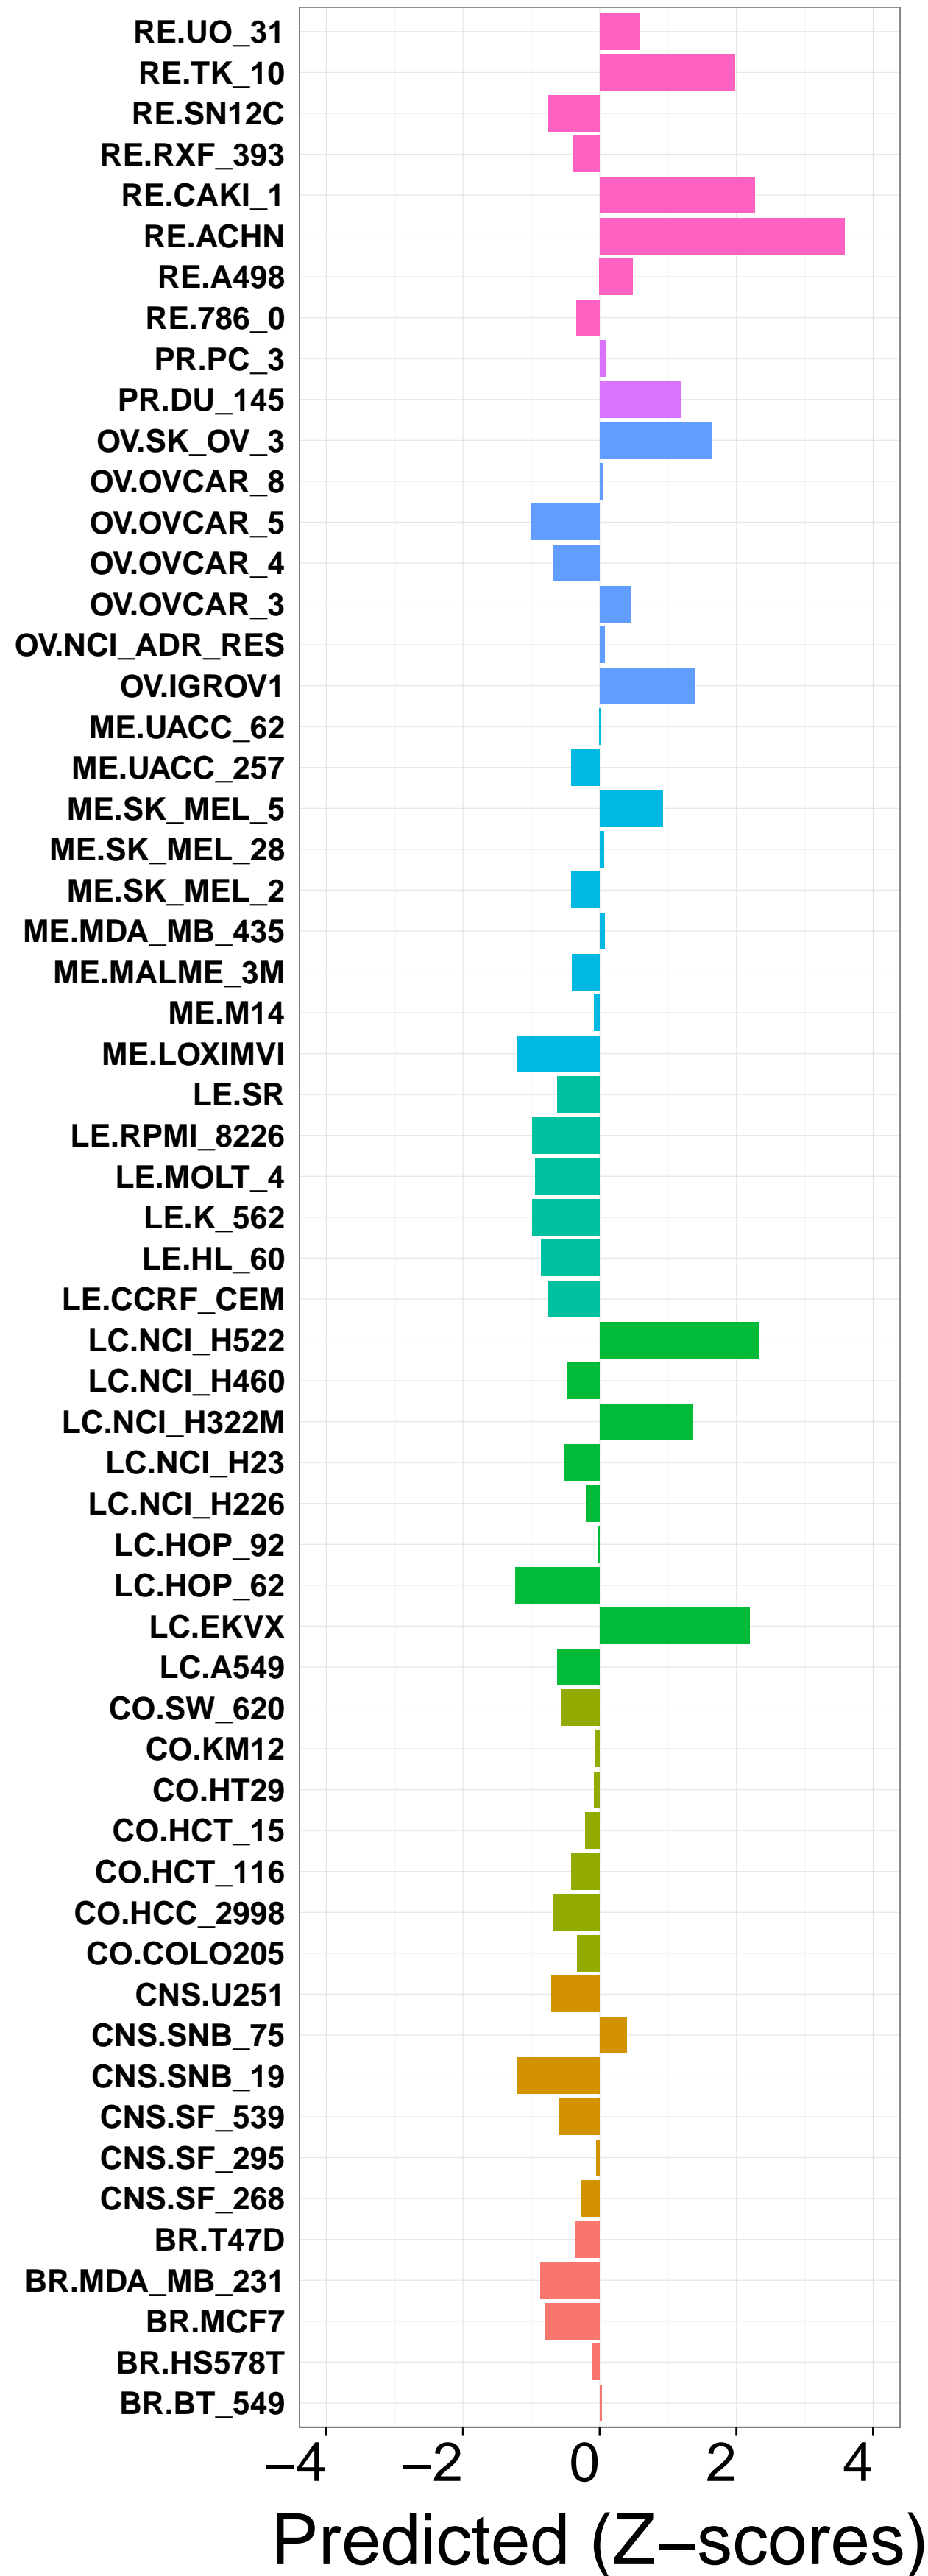

# NSC 719239, (LOCCO)

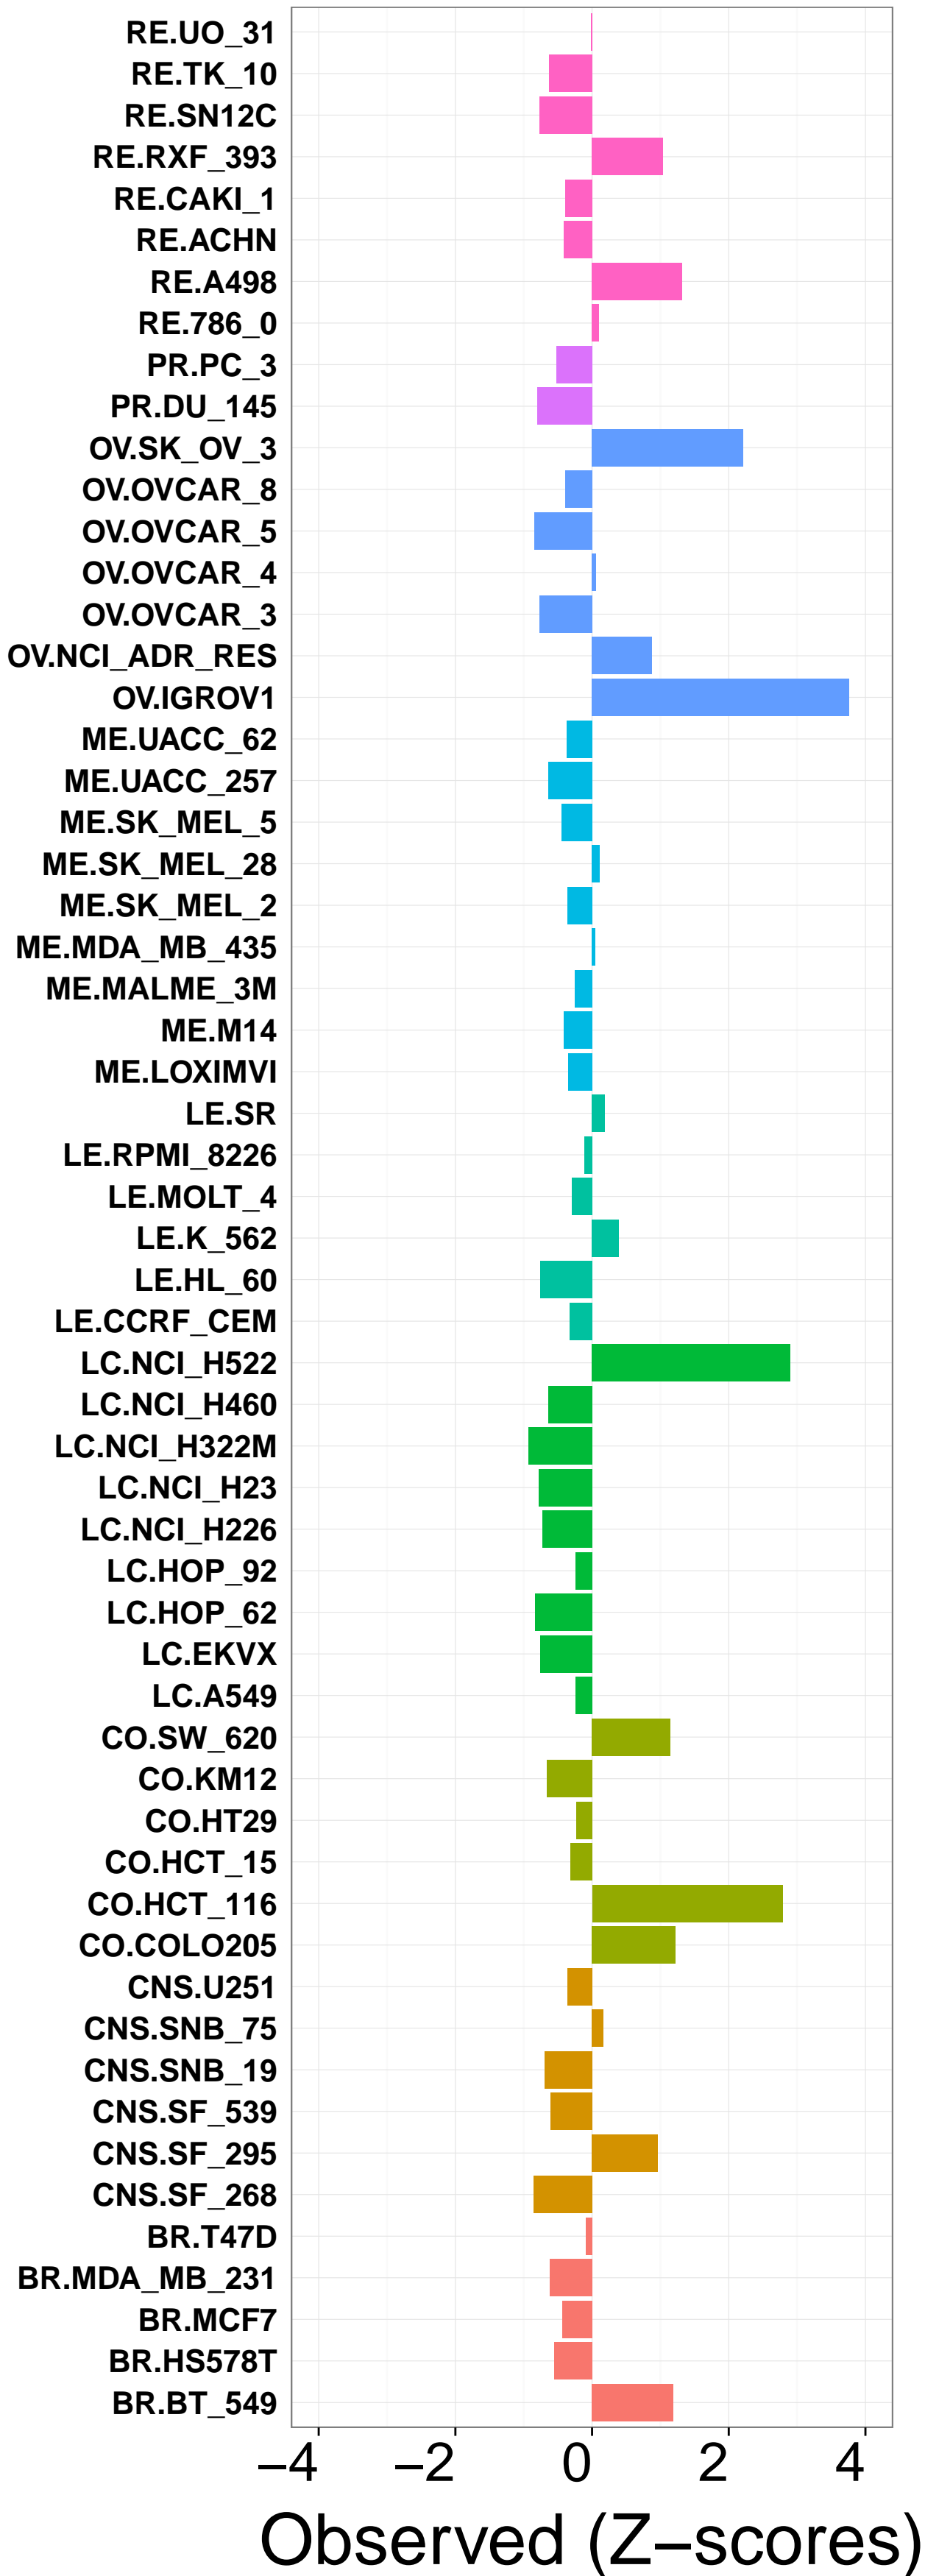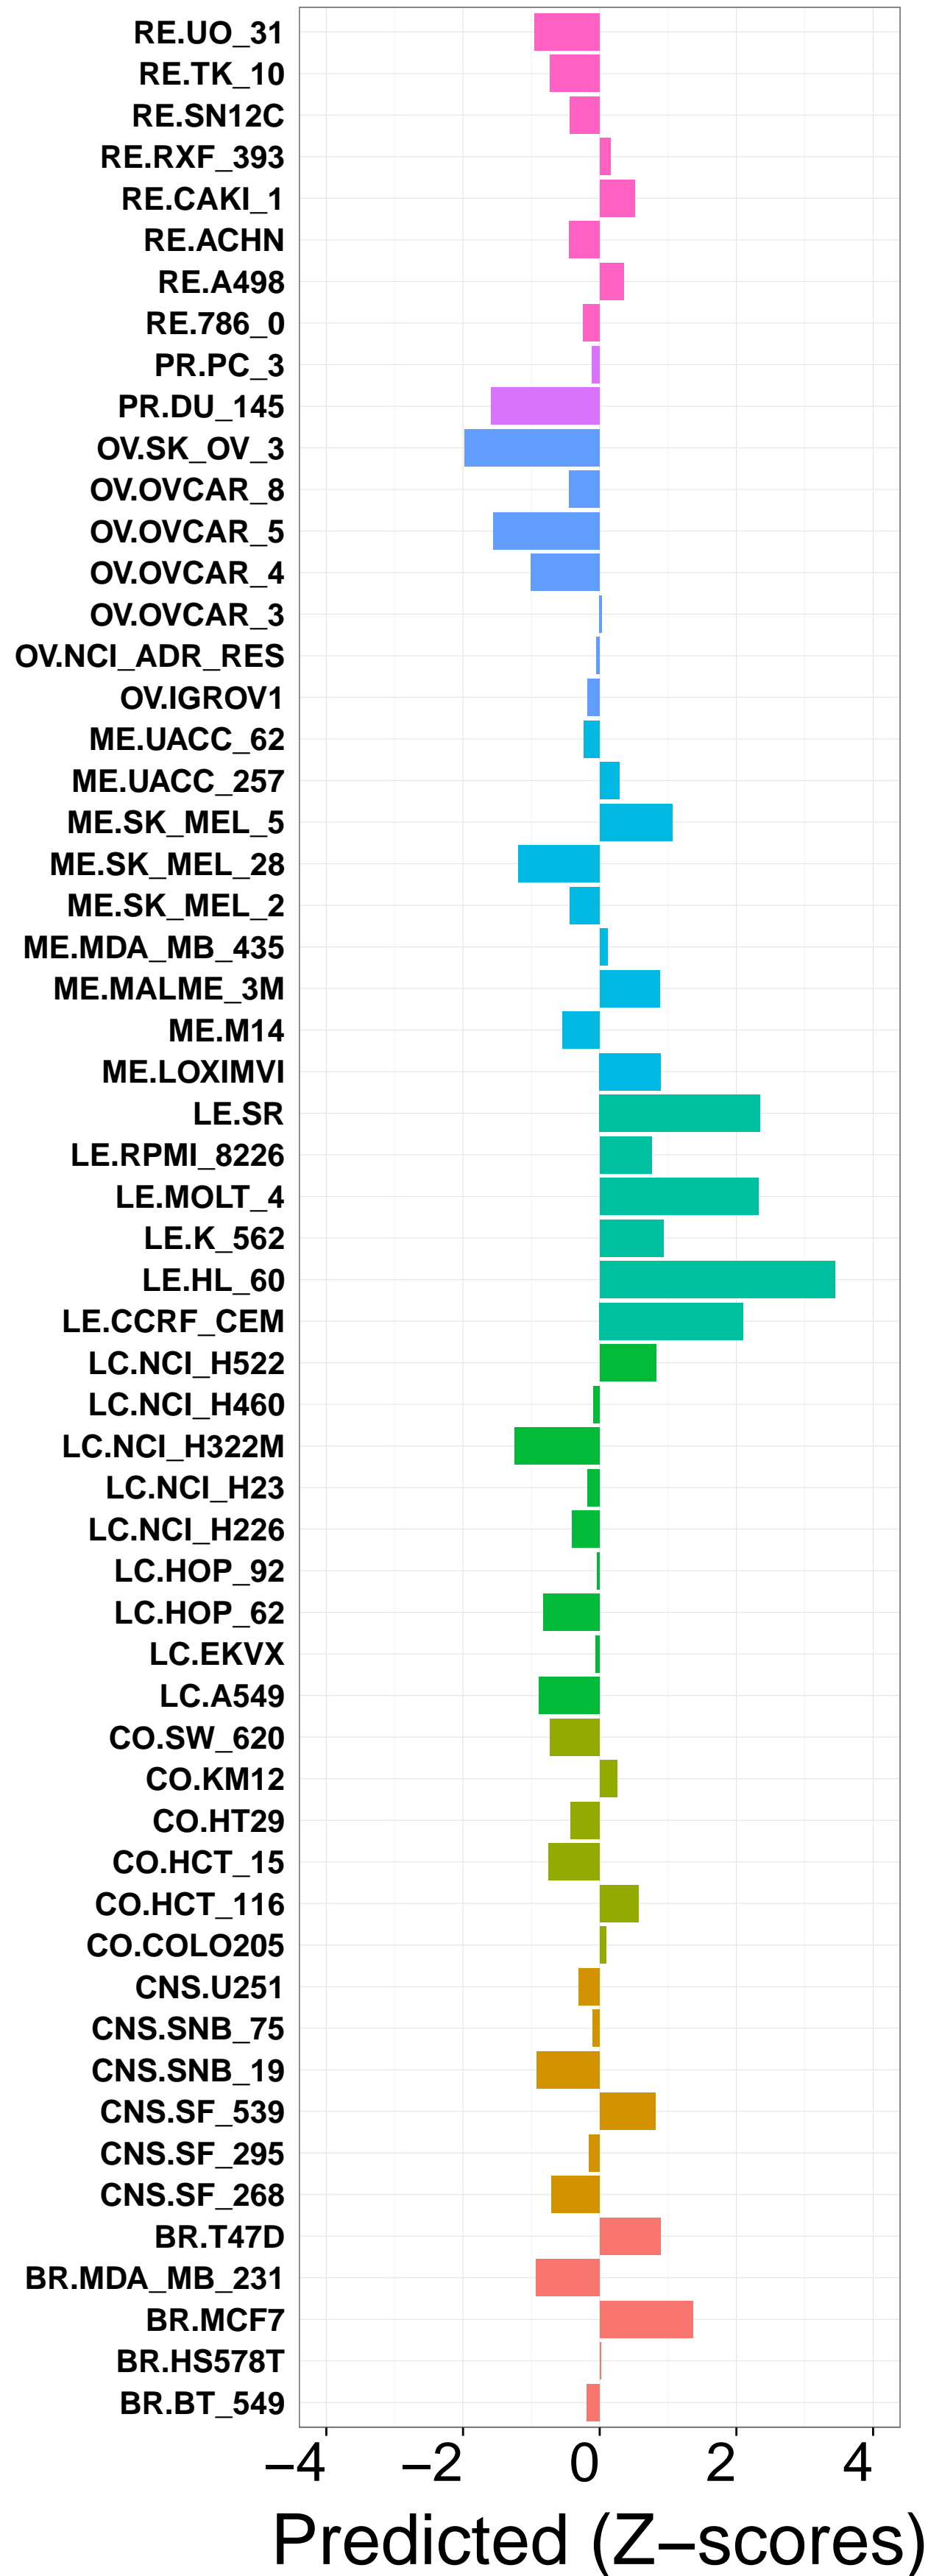

# NSC 724998, (LOCCO)

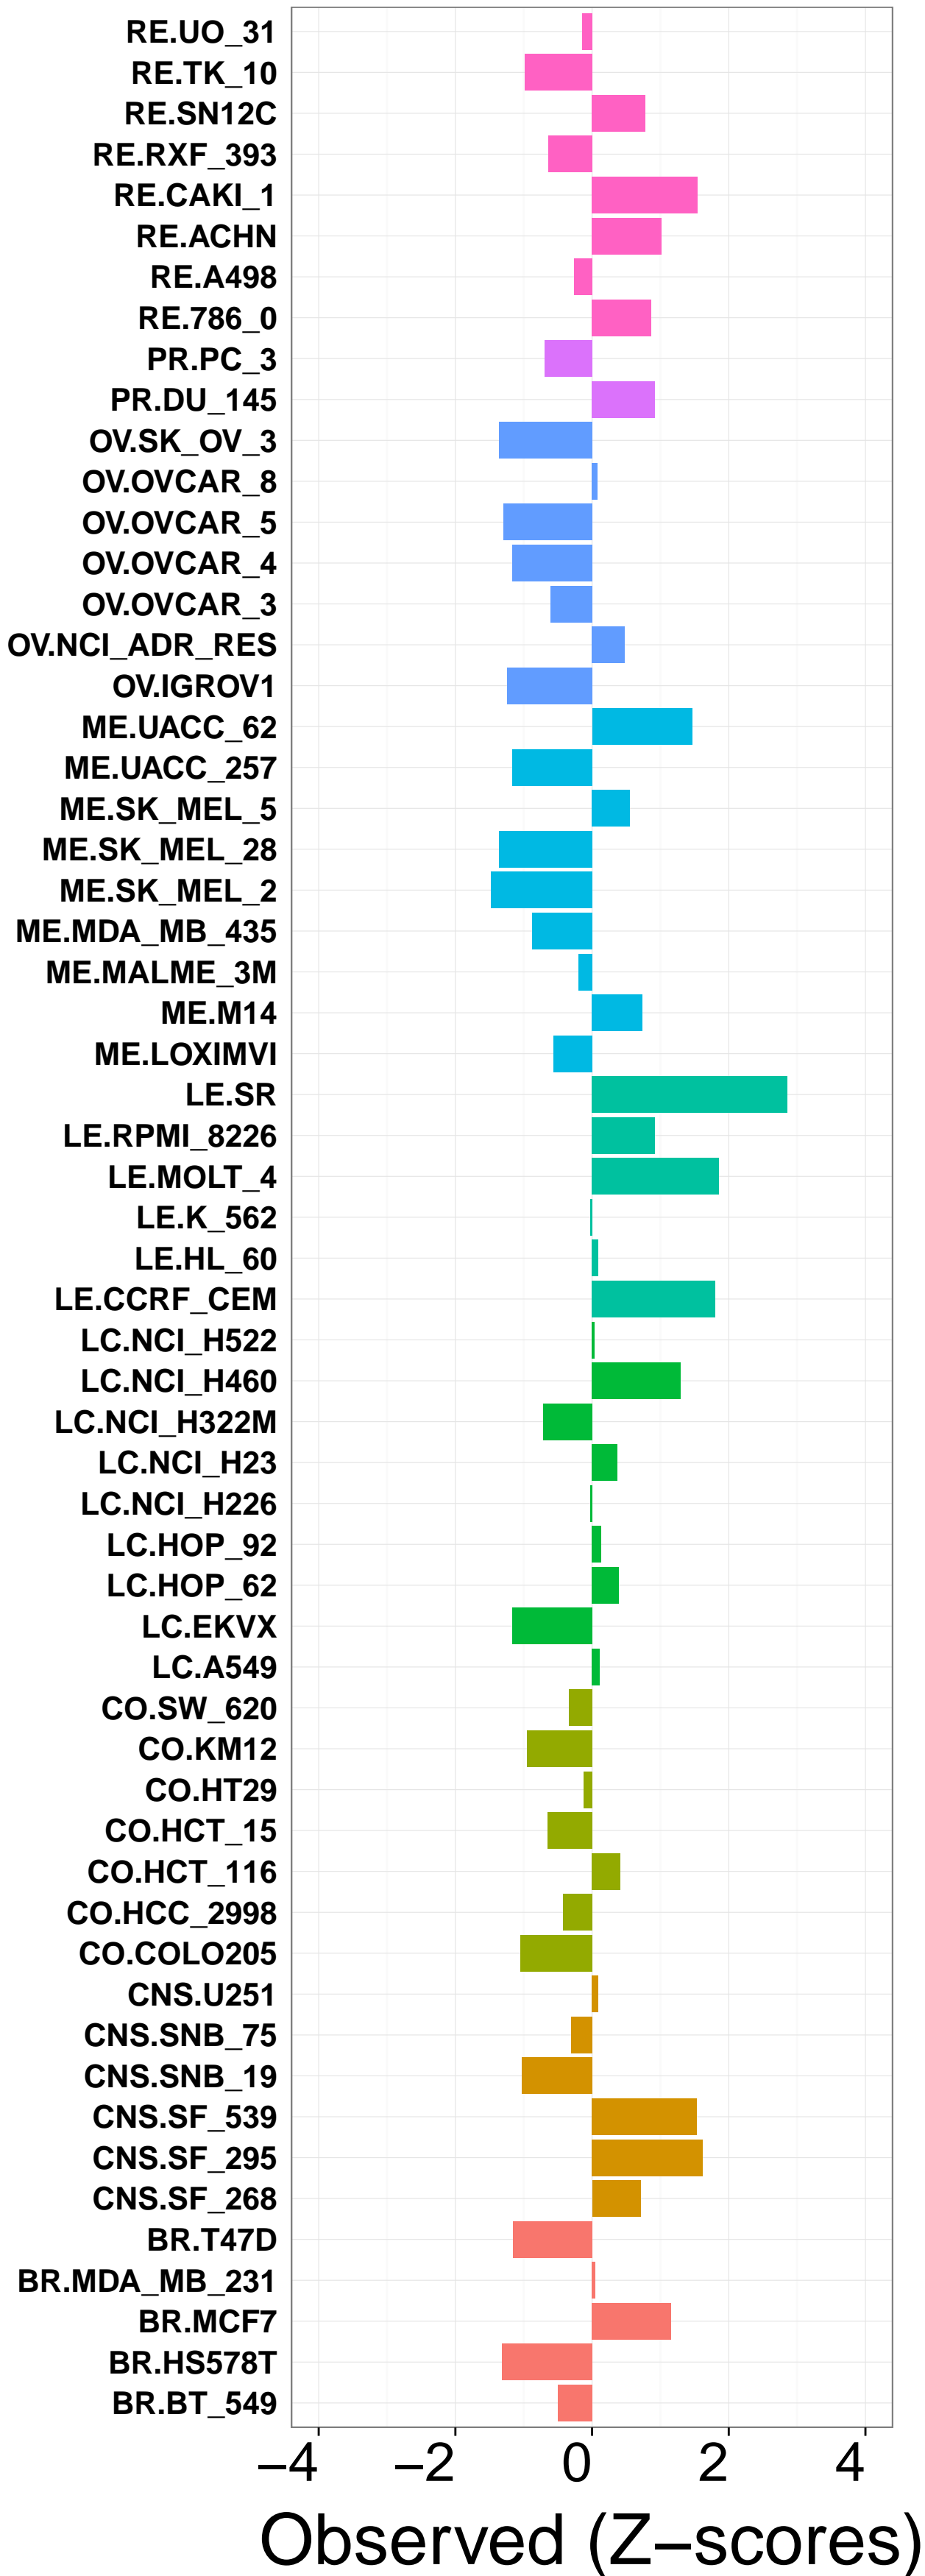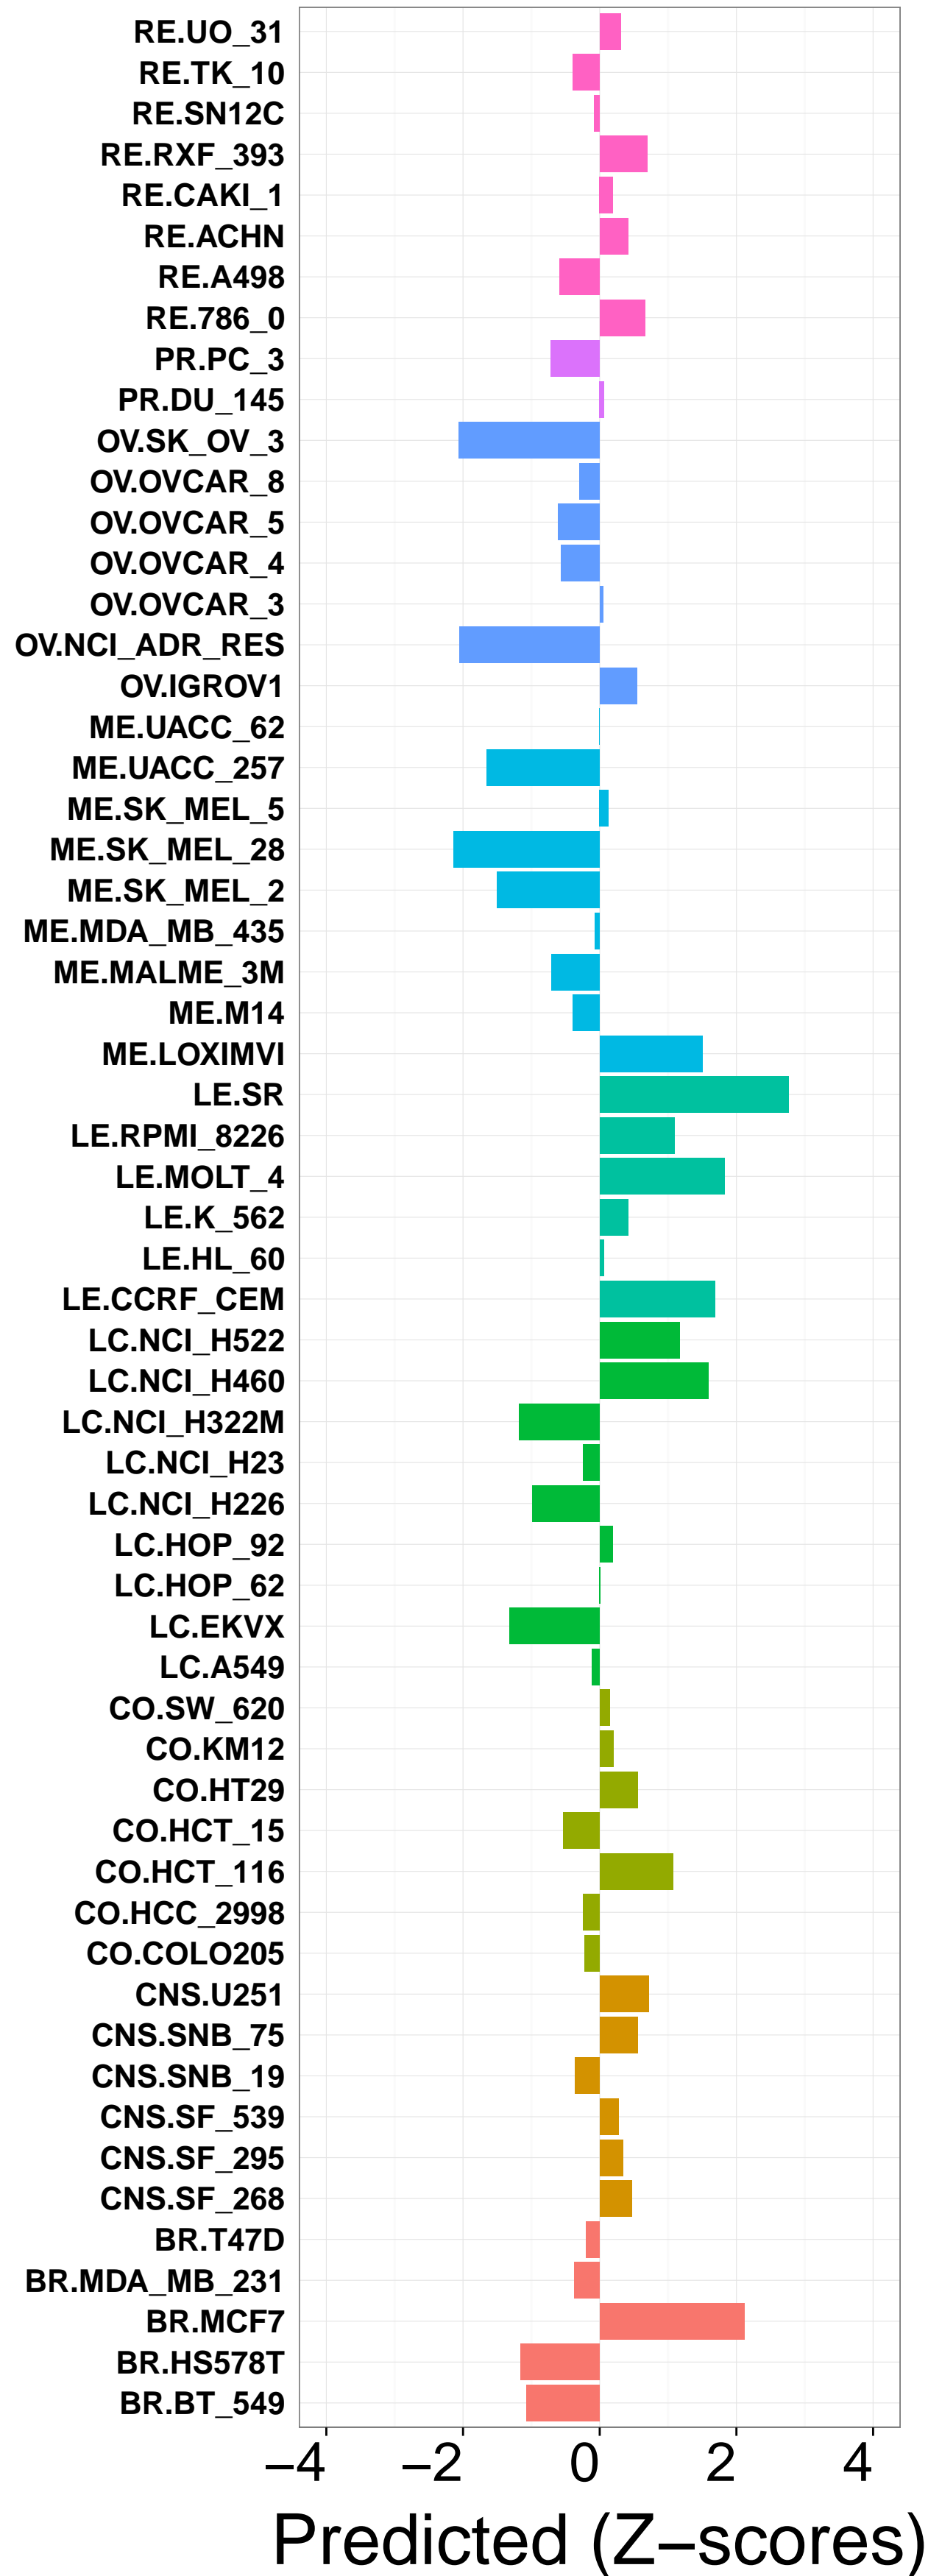

# NSC 725776, (LOCCO)

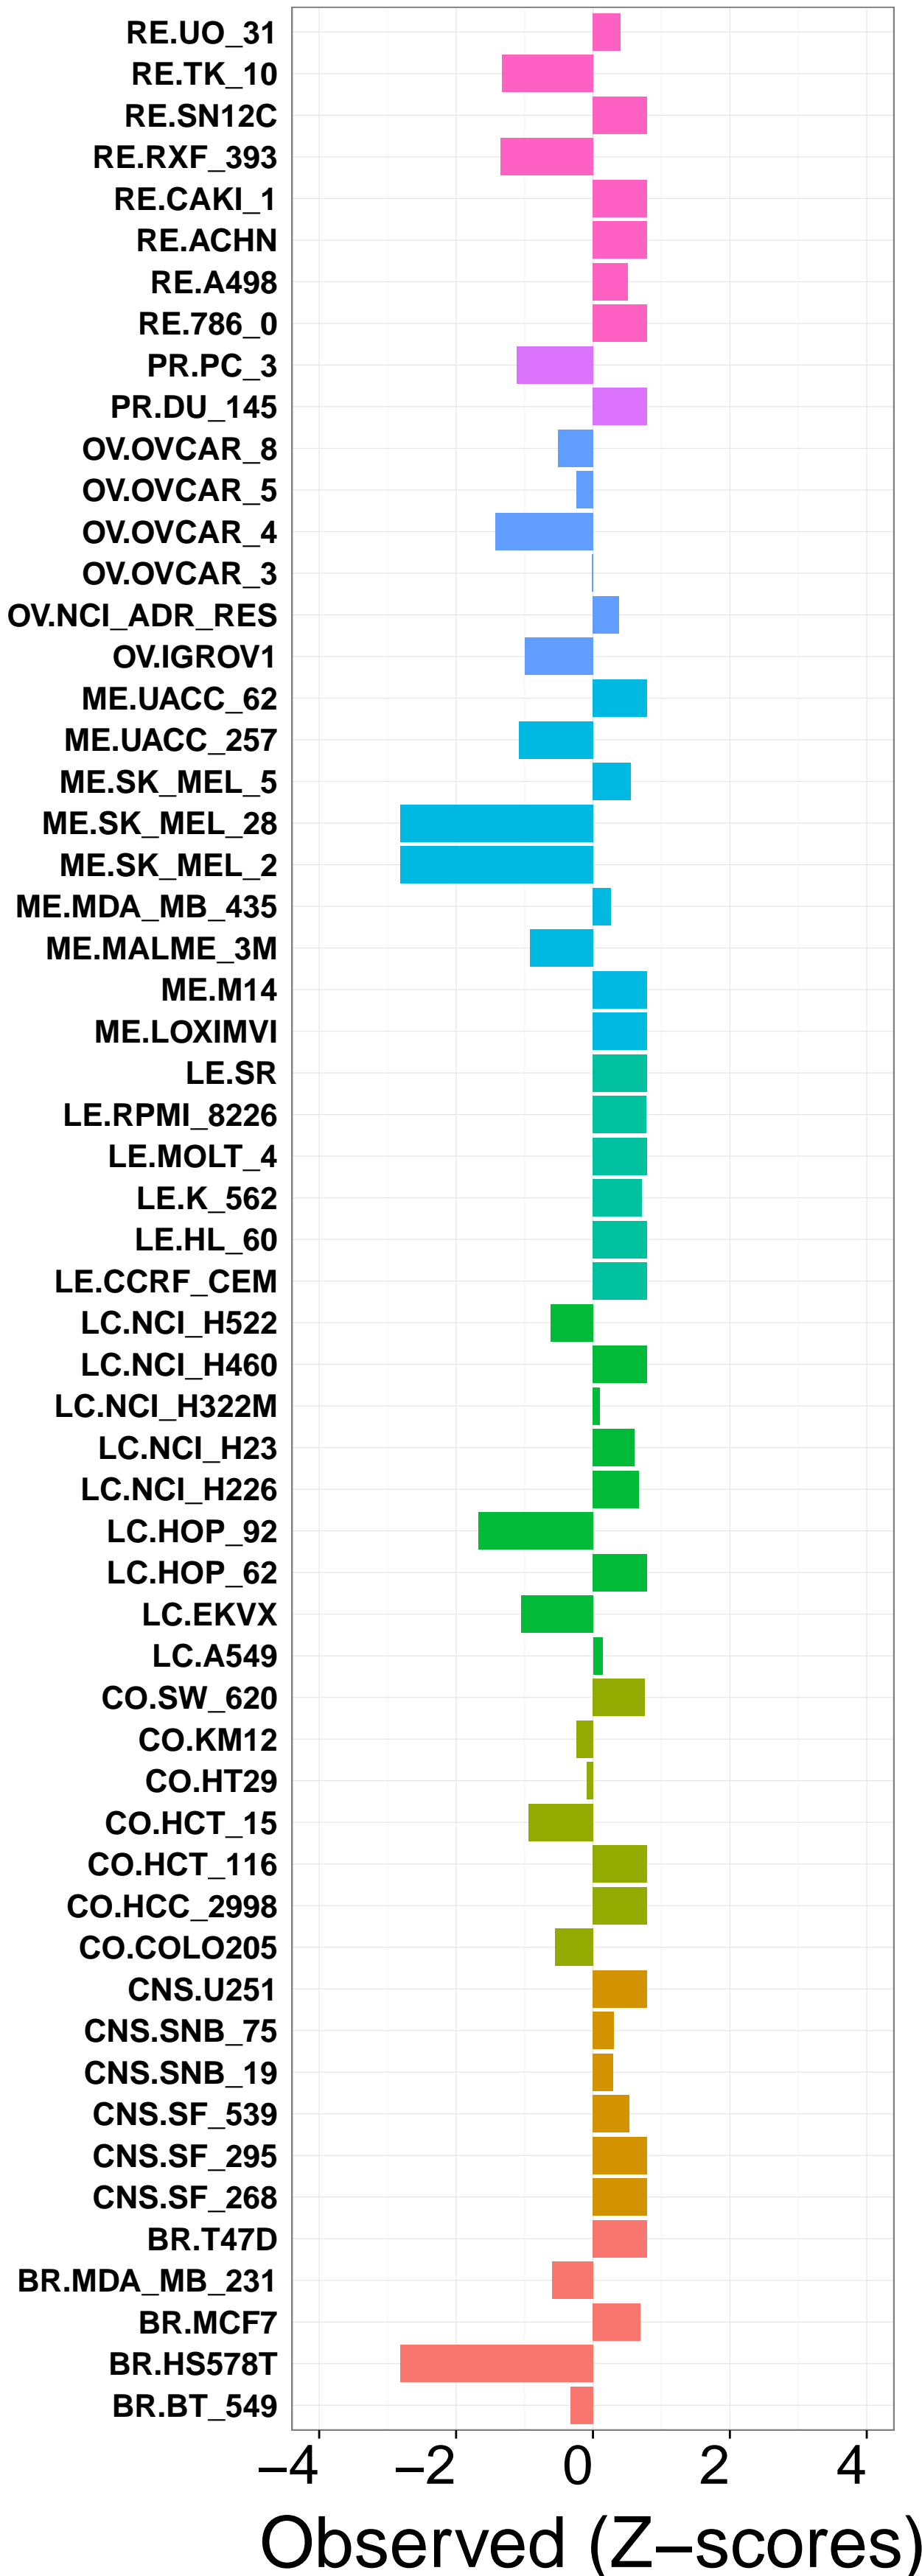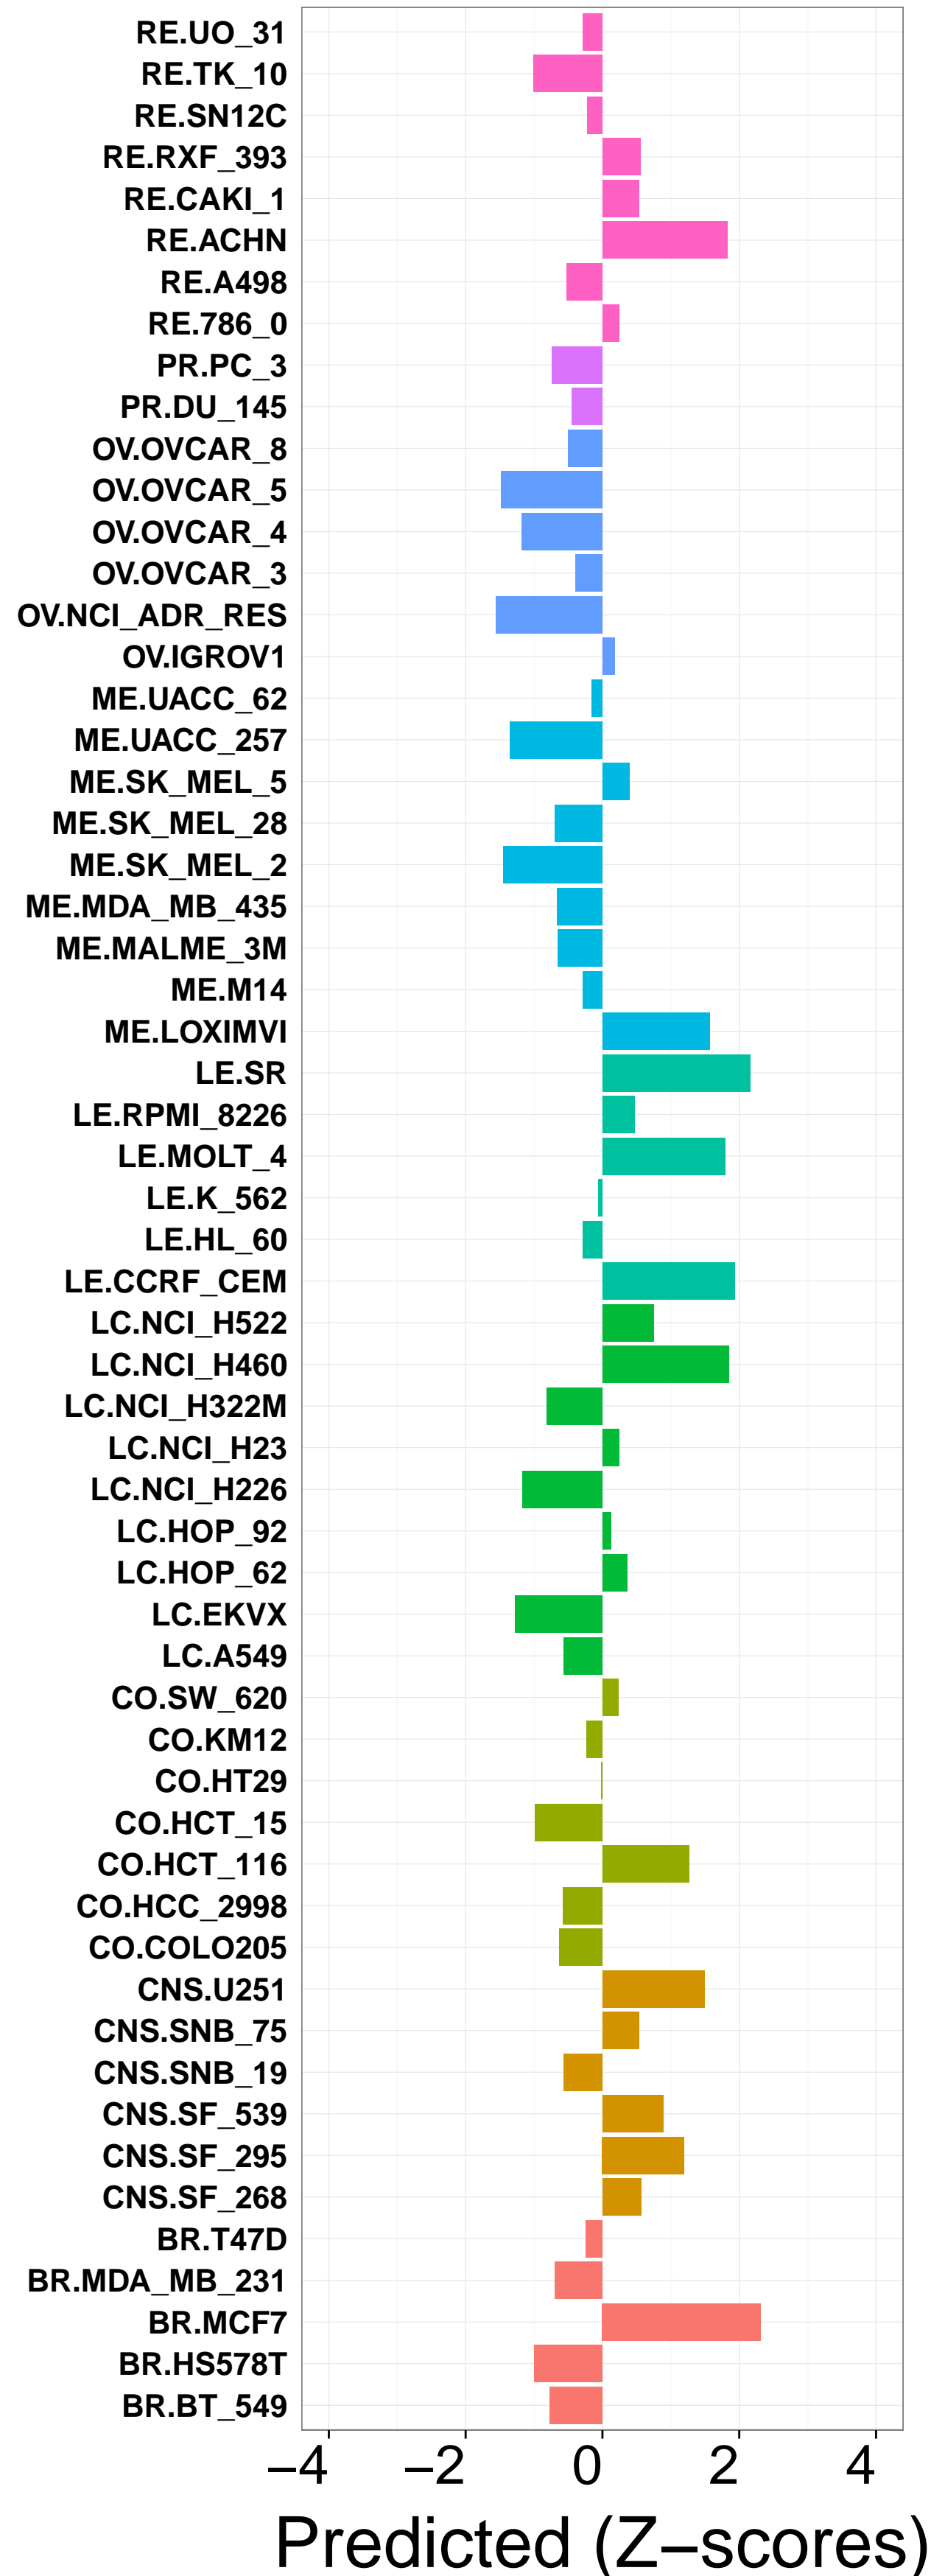



# NSC 726630, (LOCCO)

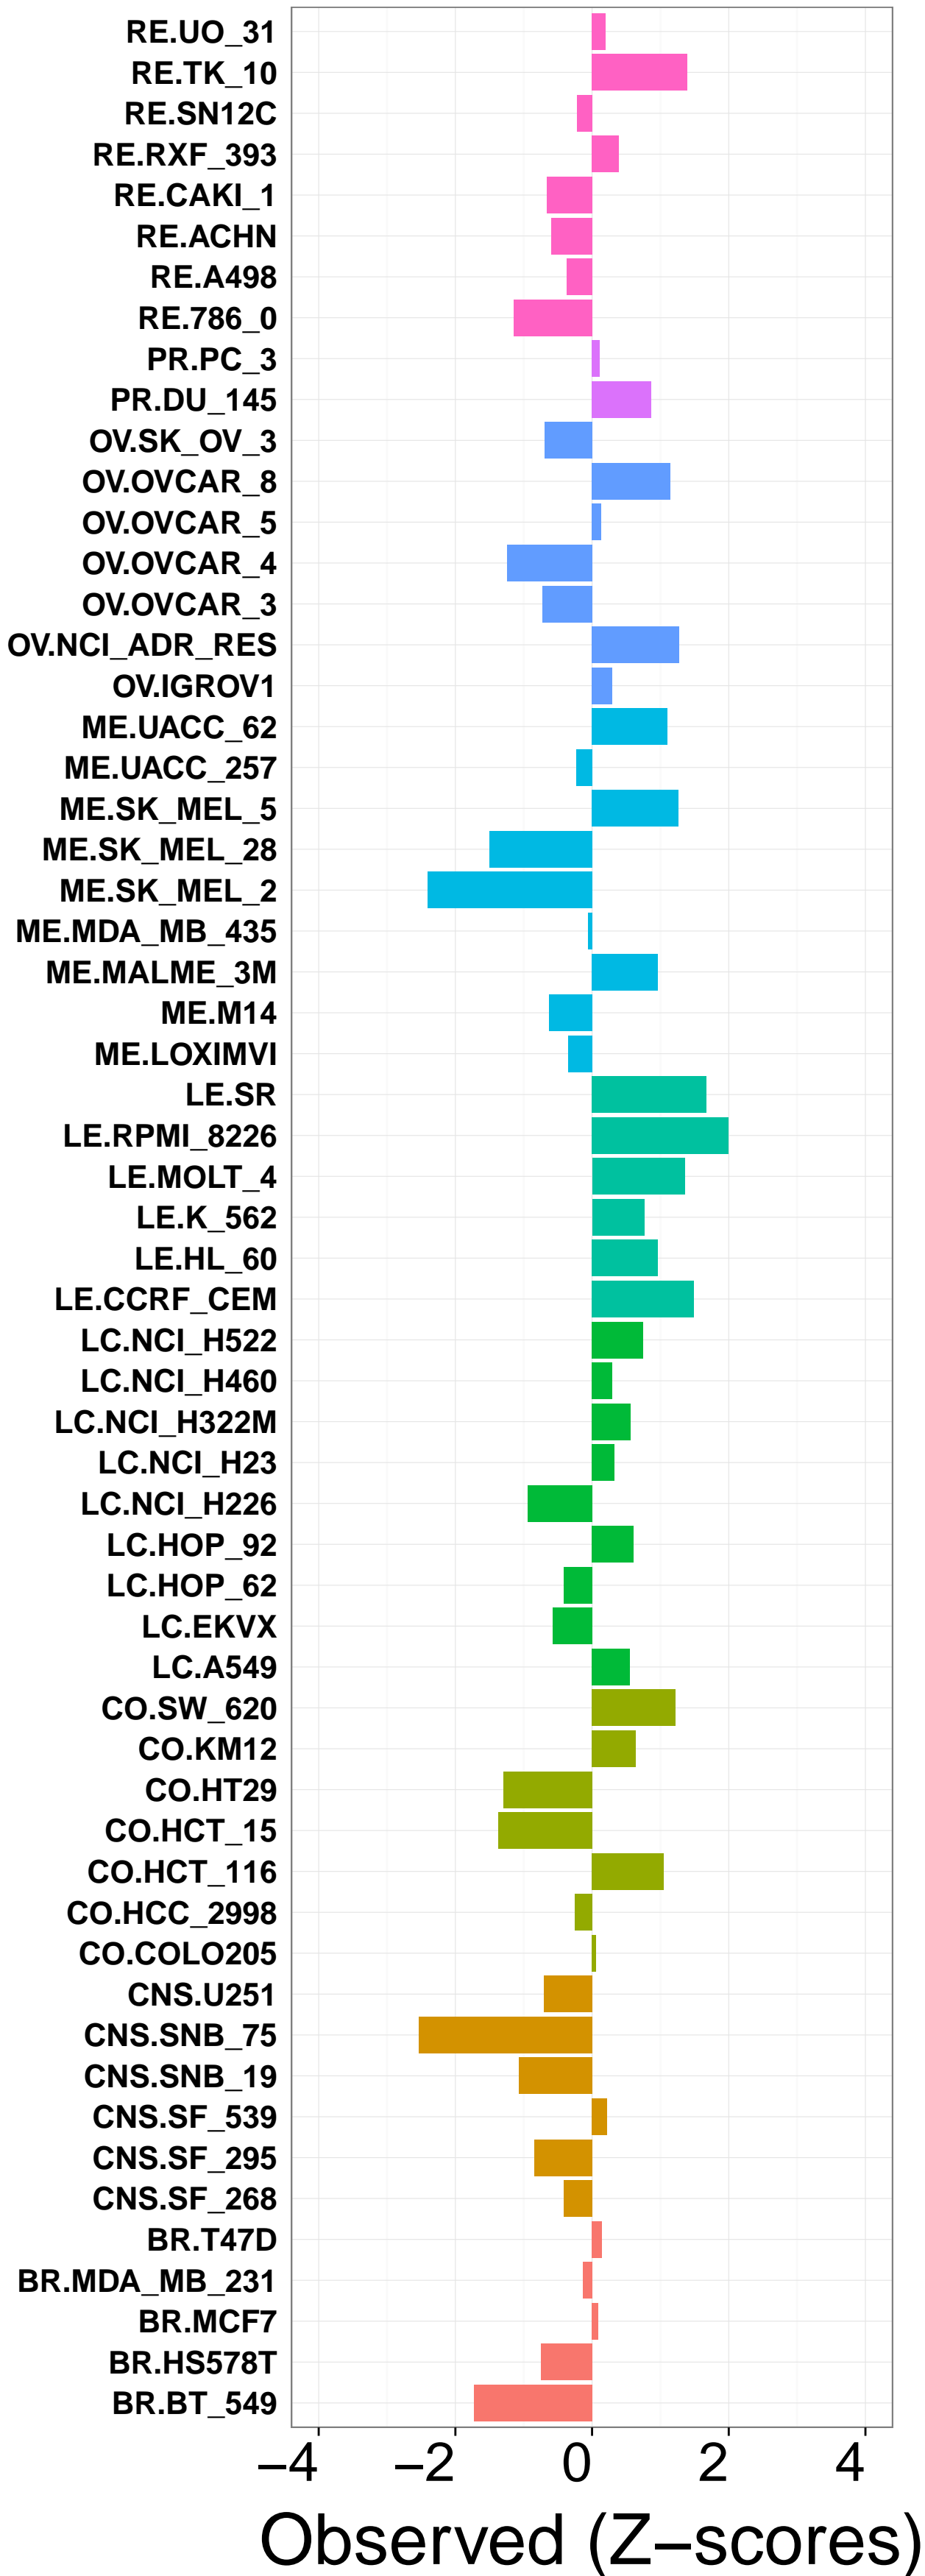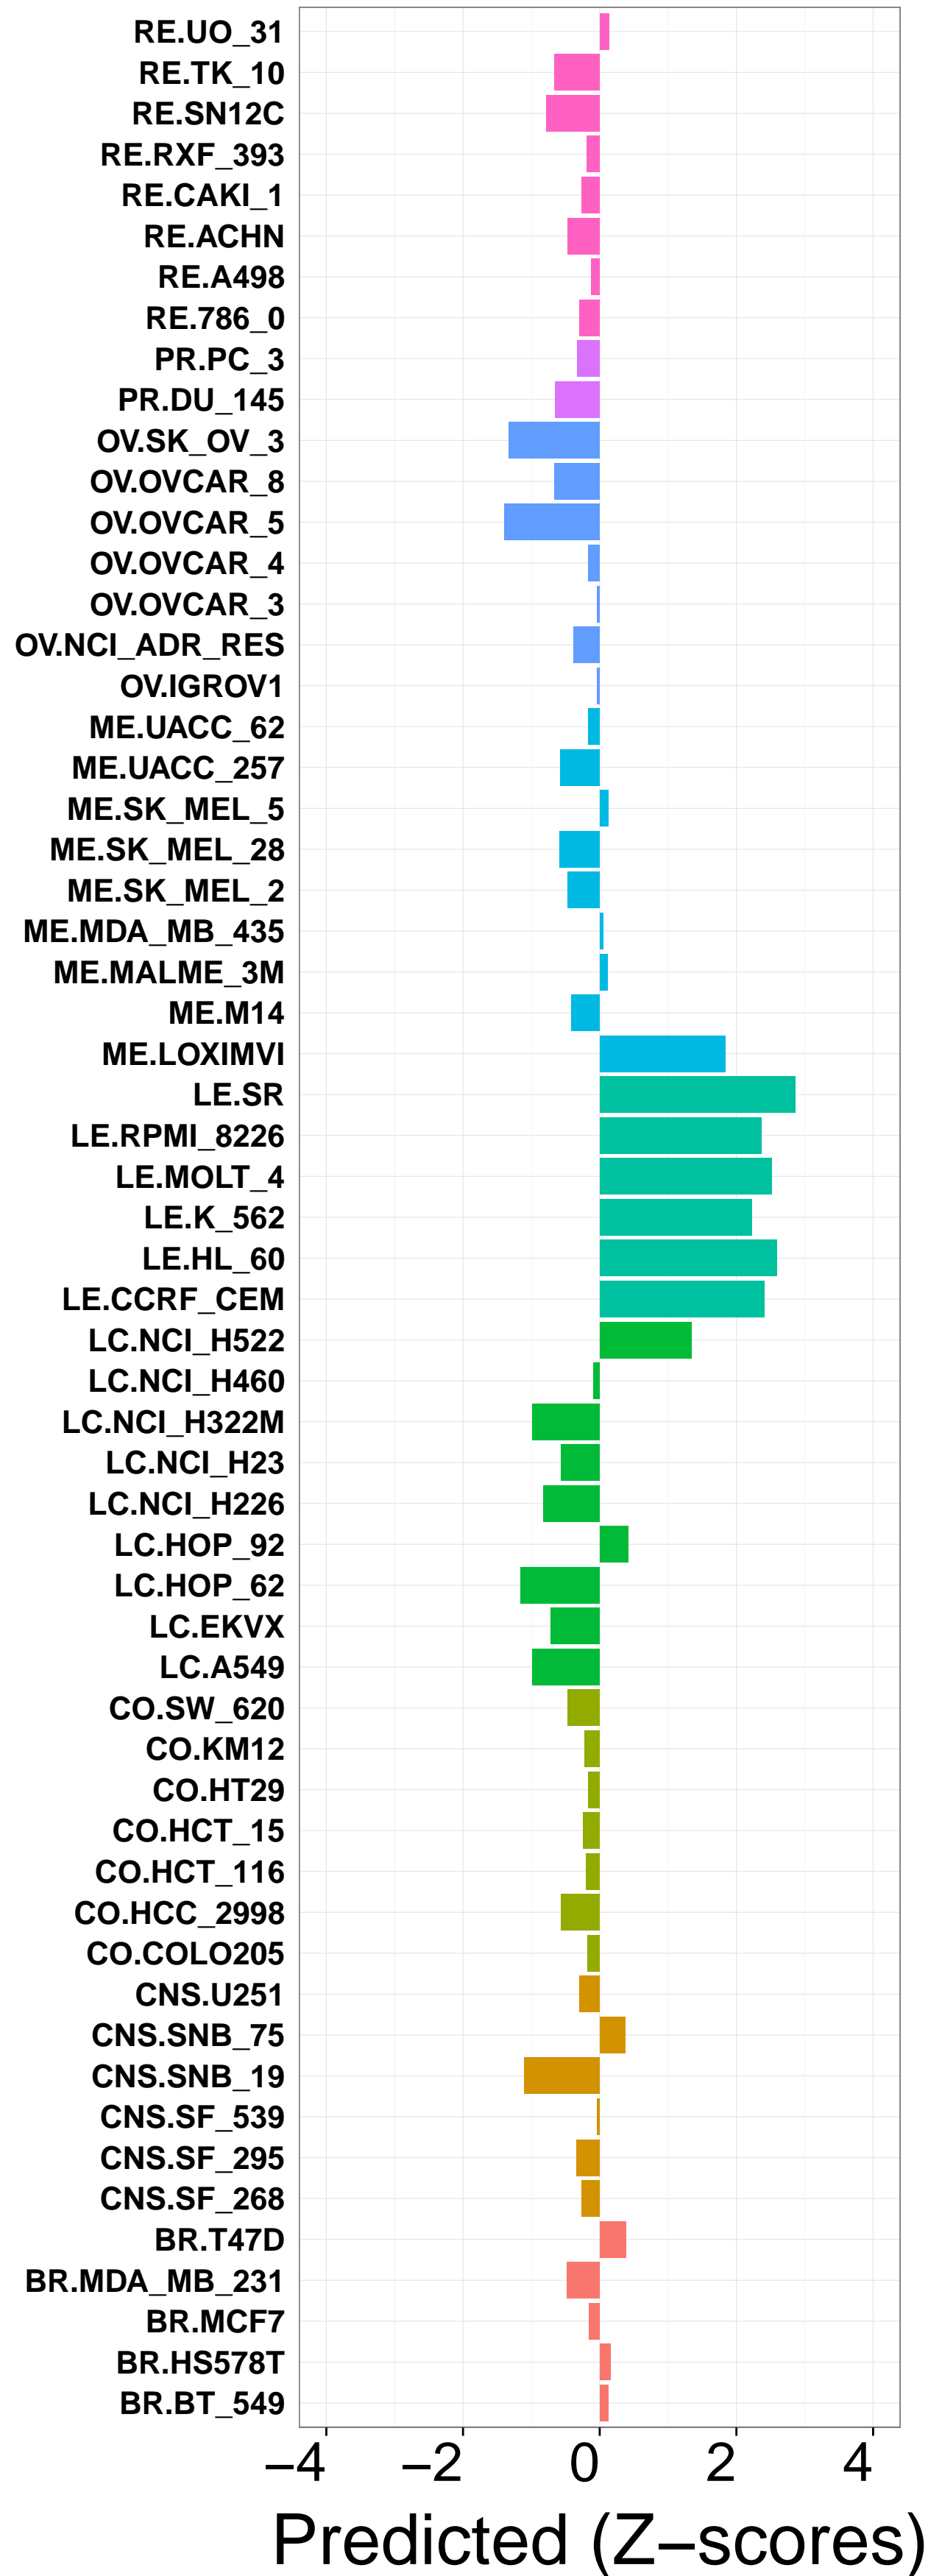

# NSC 728073, (LOCCO)

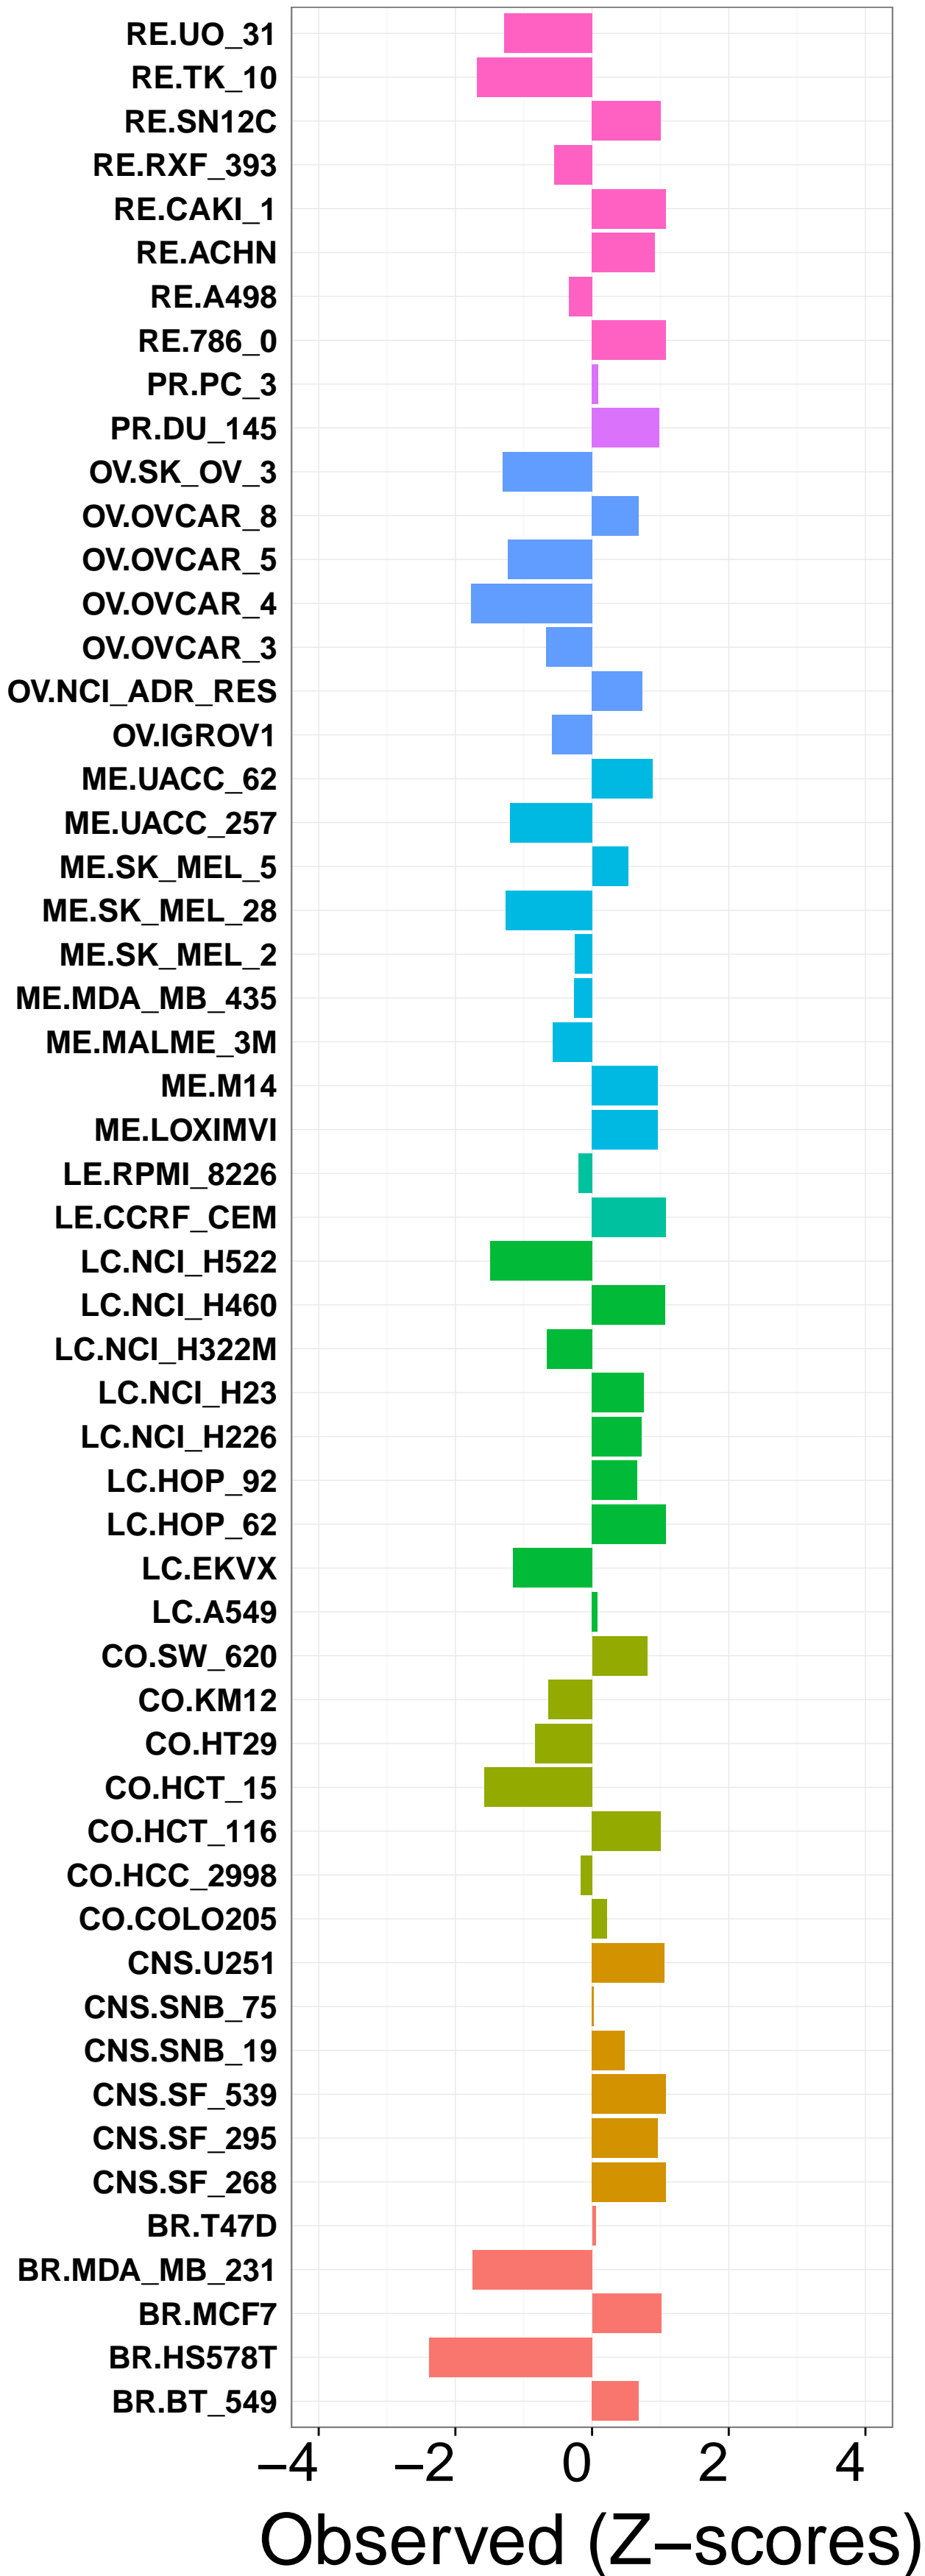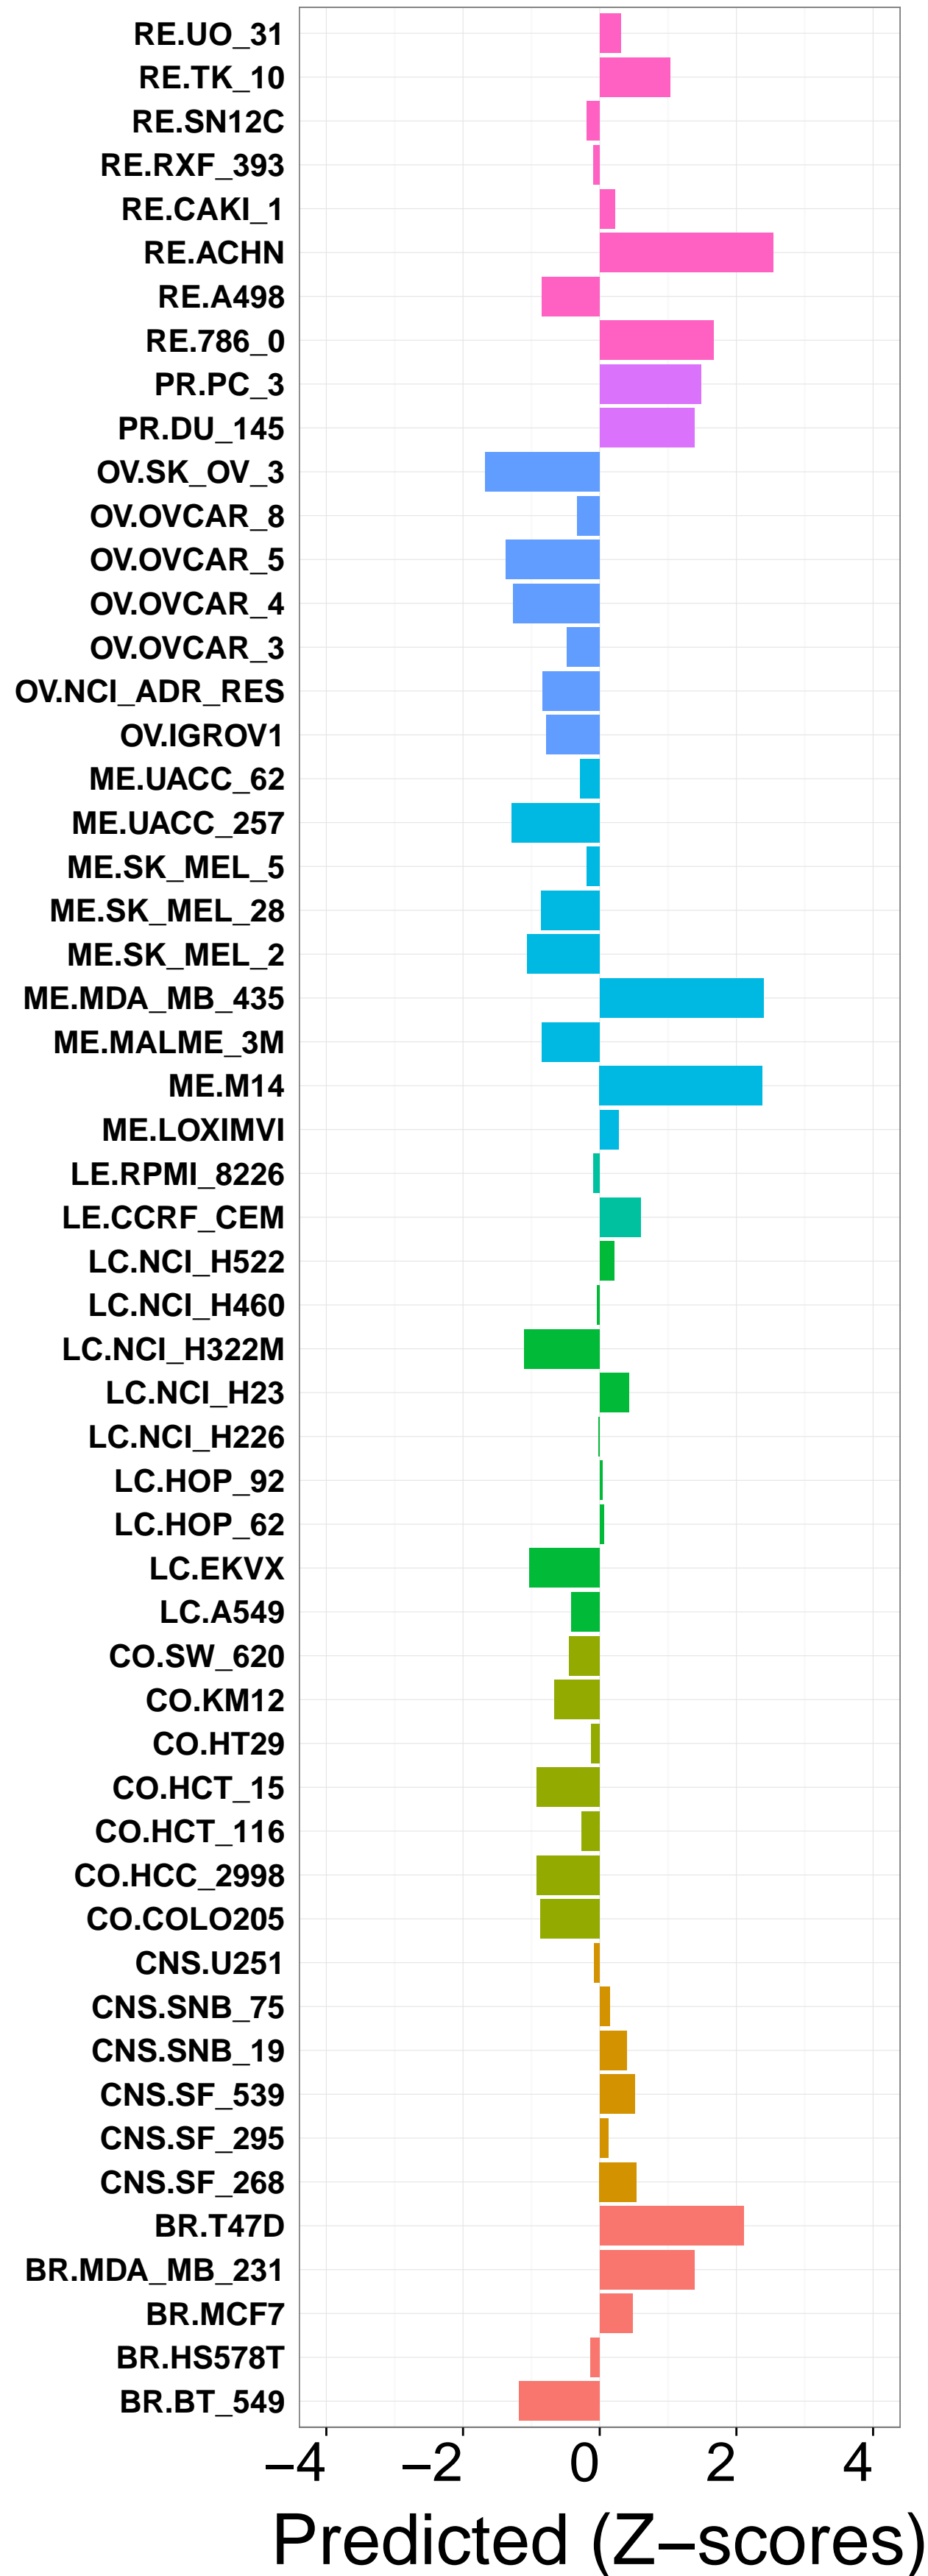

# NSC 732517, (LOCCO)

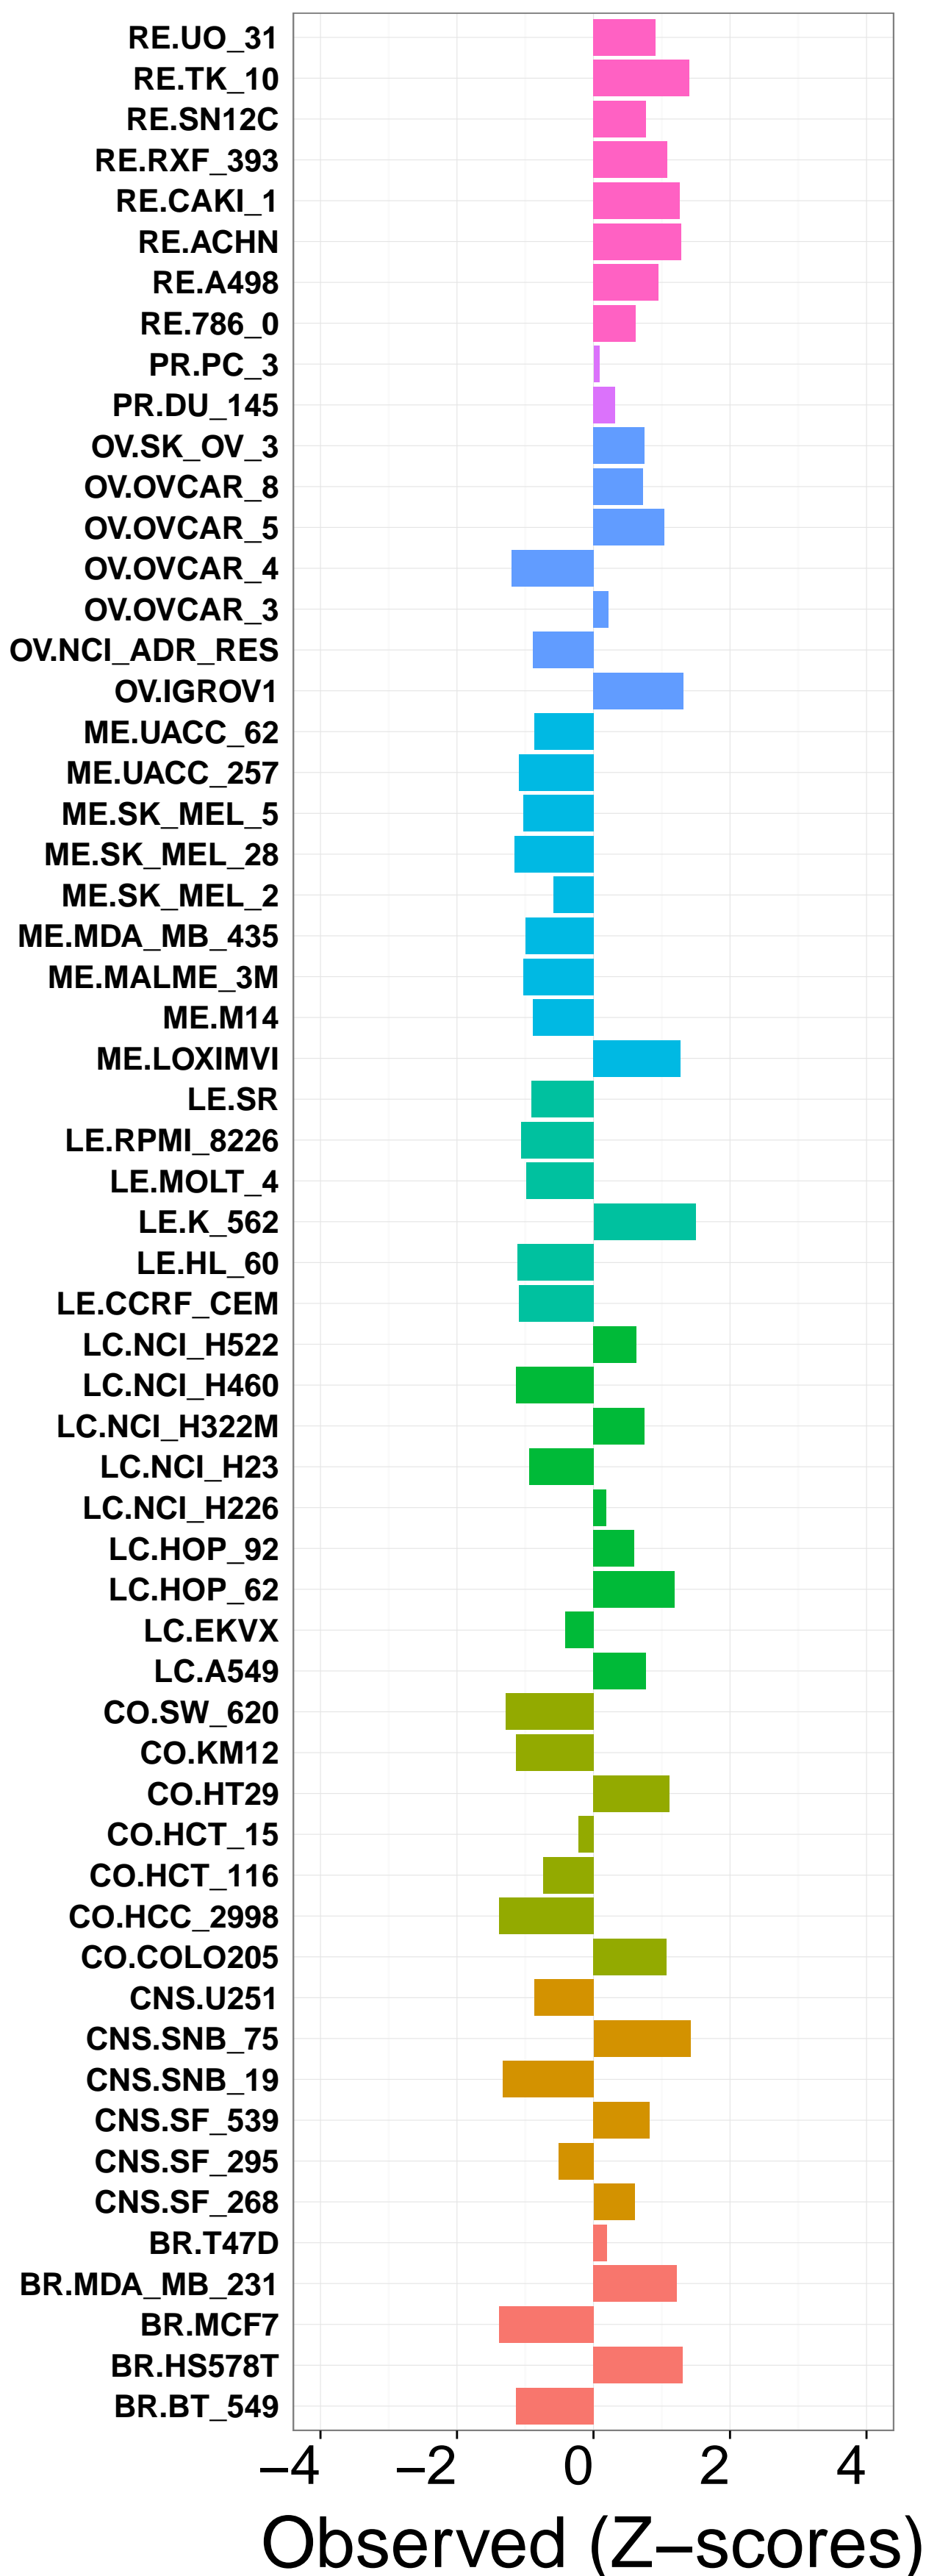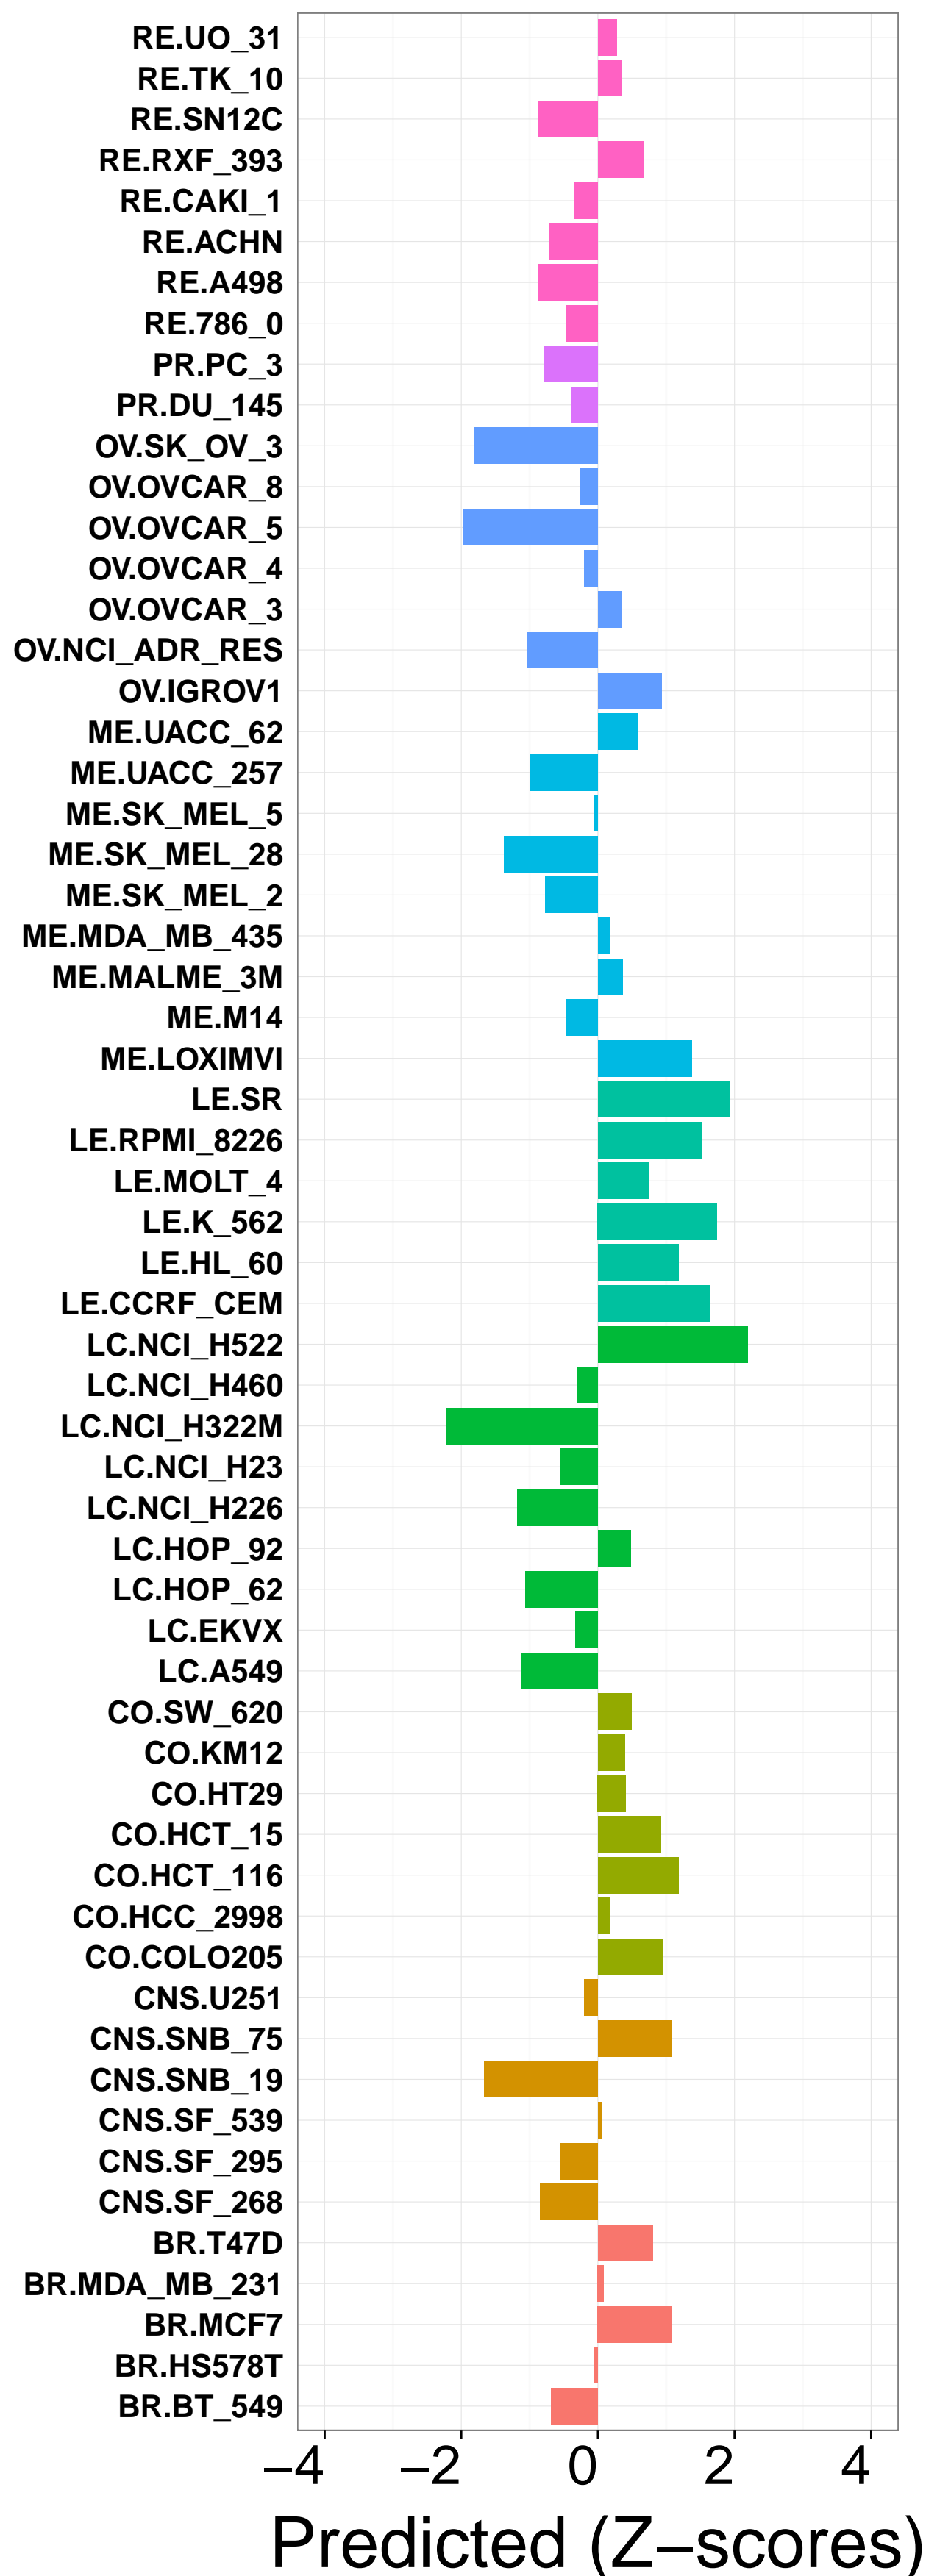

# NSC 740, Methotrexate (LOCCO)

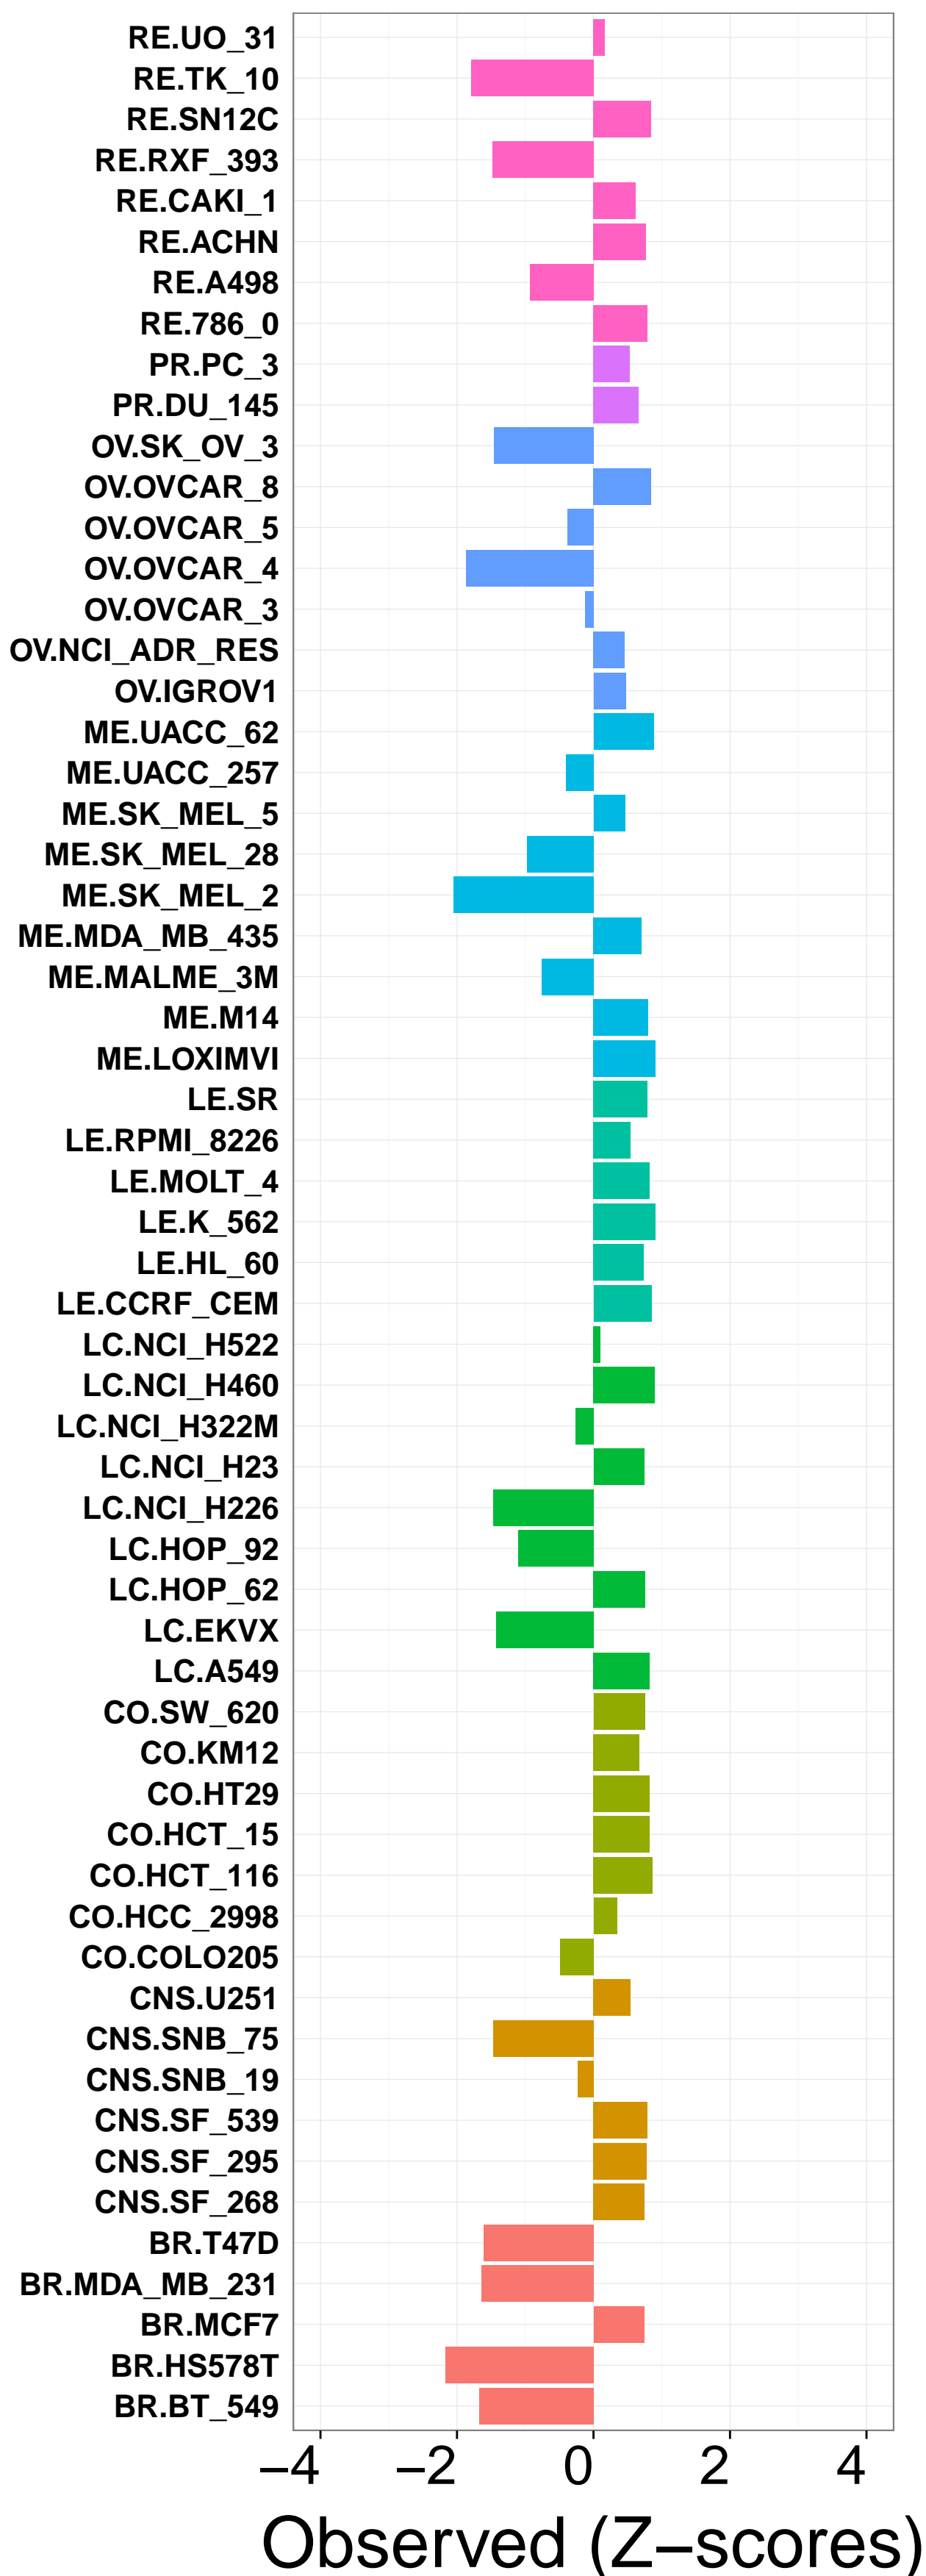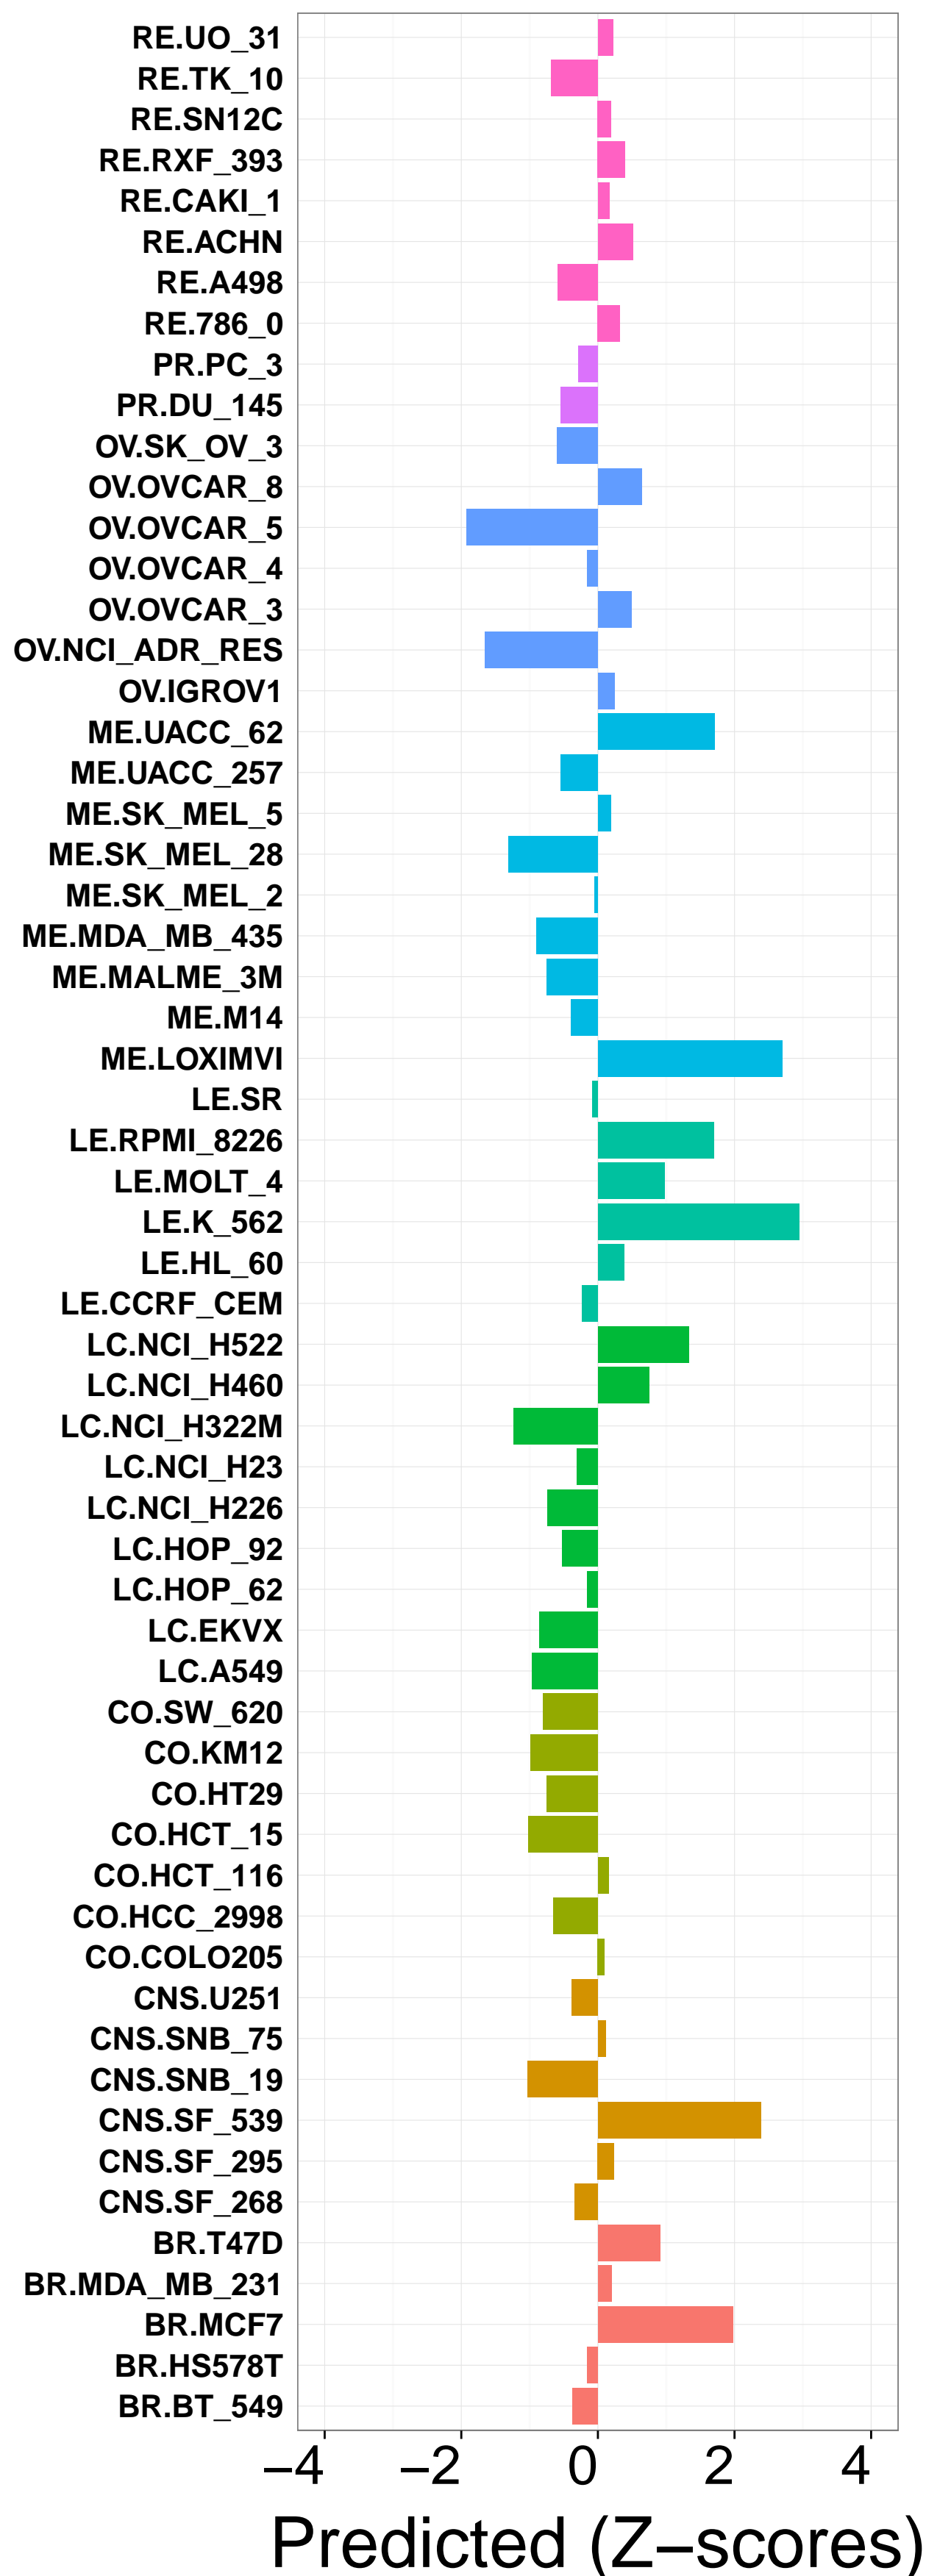

# NSC 741078, selumetinib (LOCCO)

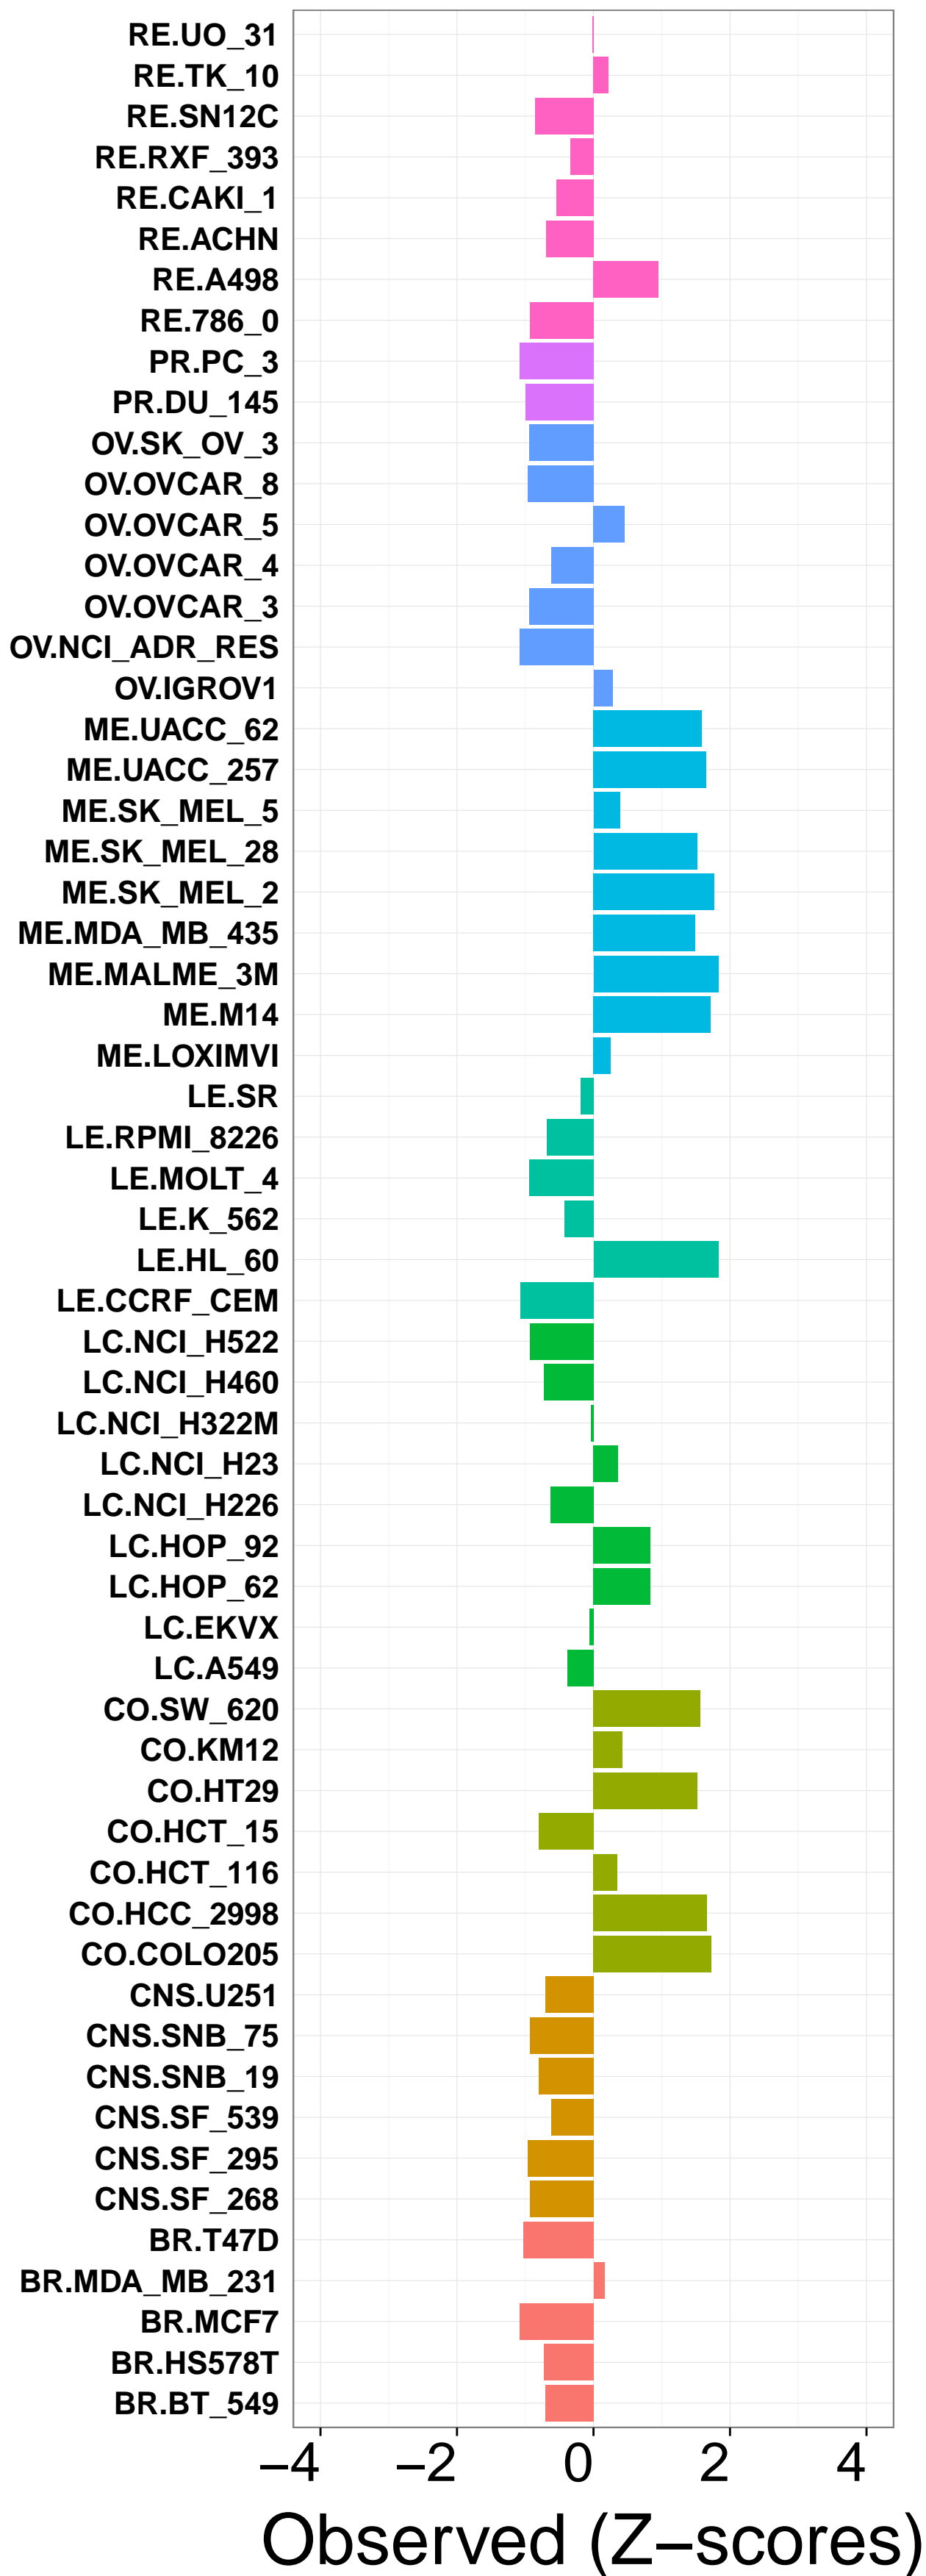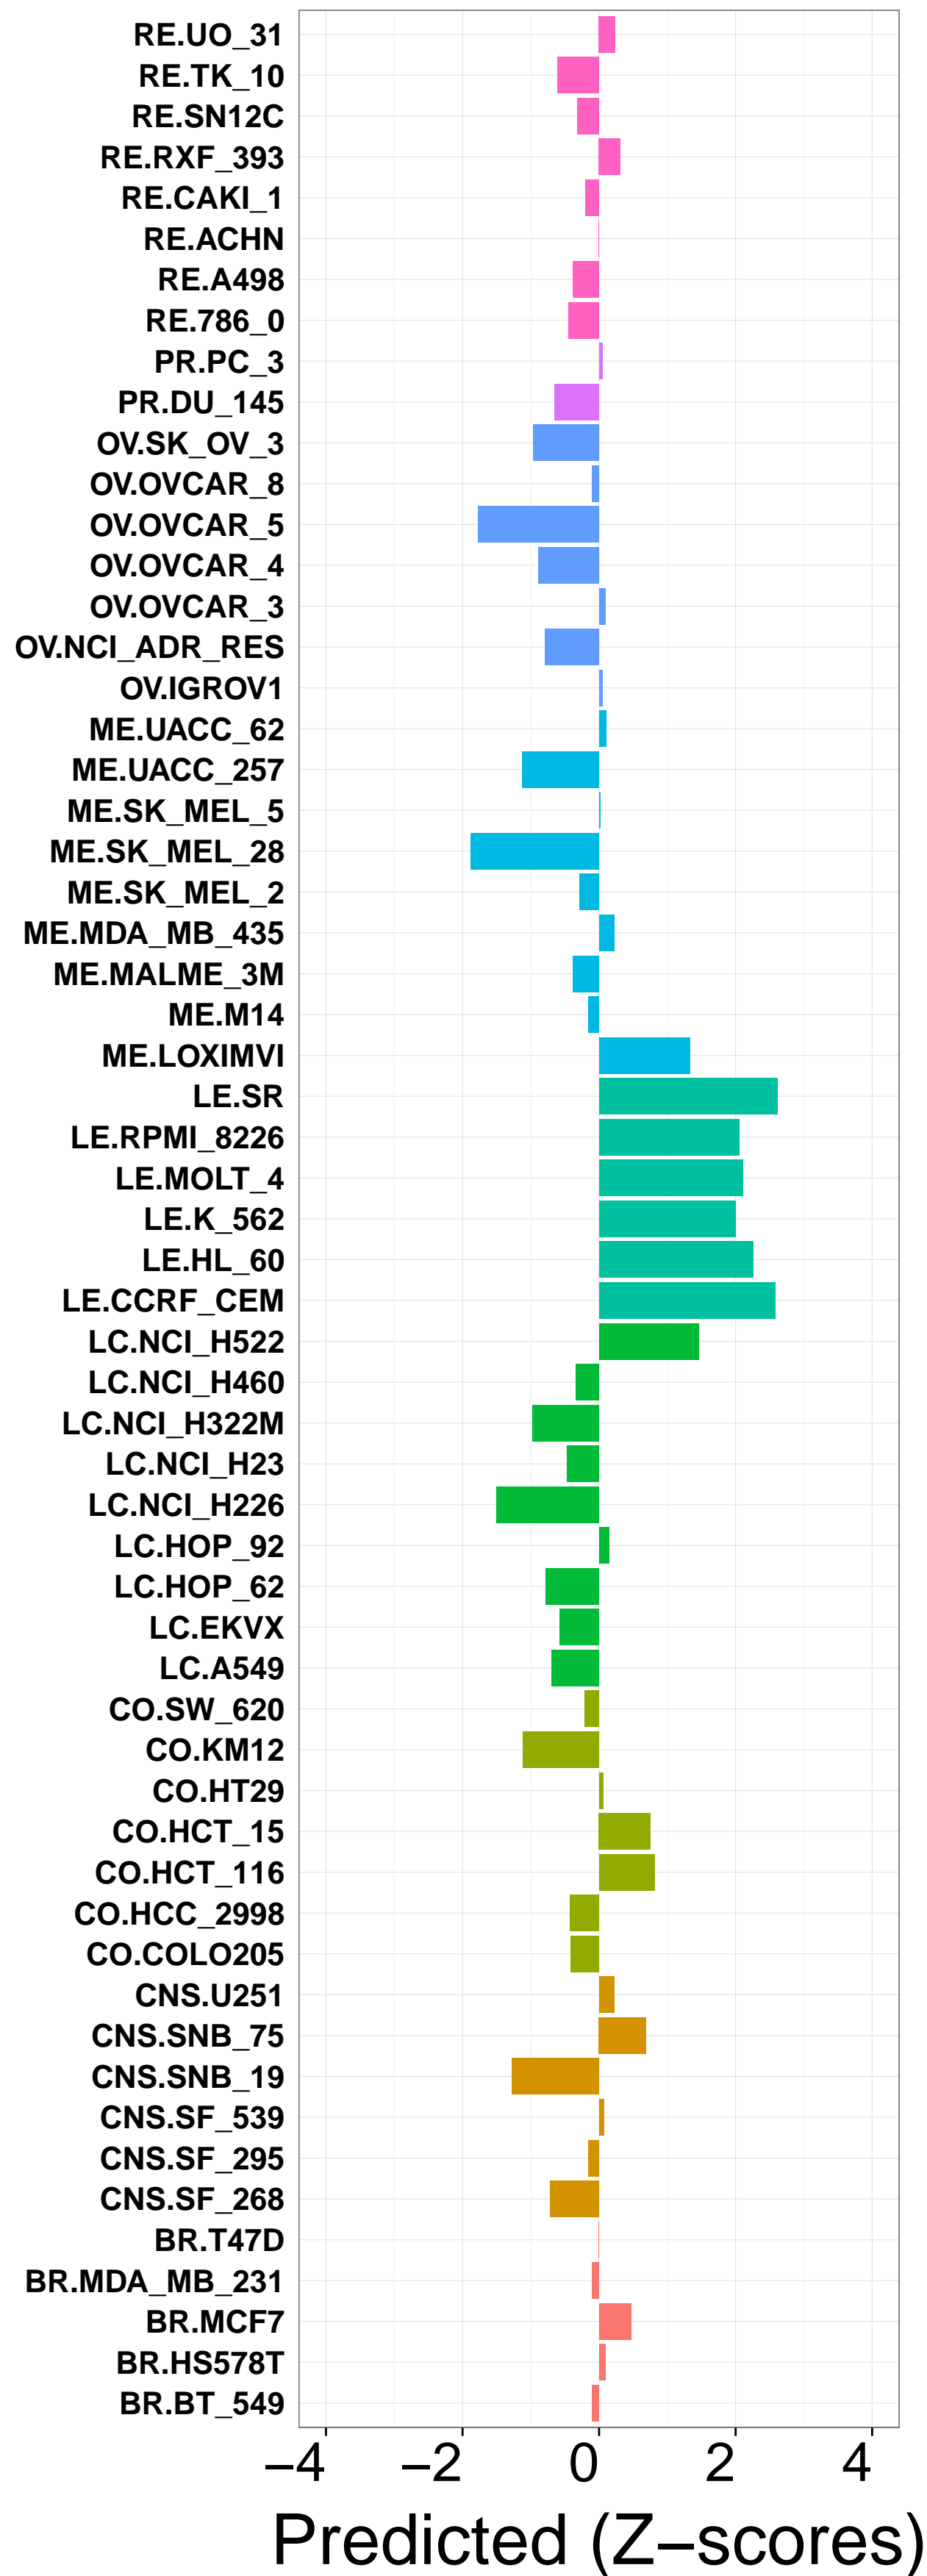



# NSC 745750, Tykerb (LOCCO)

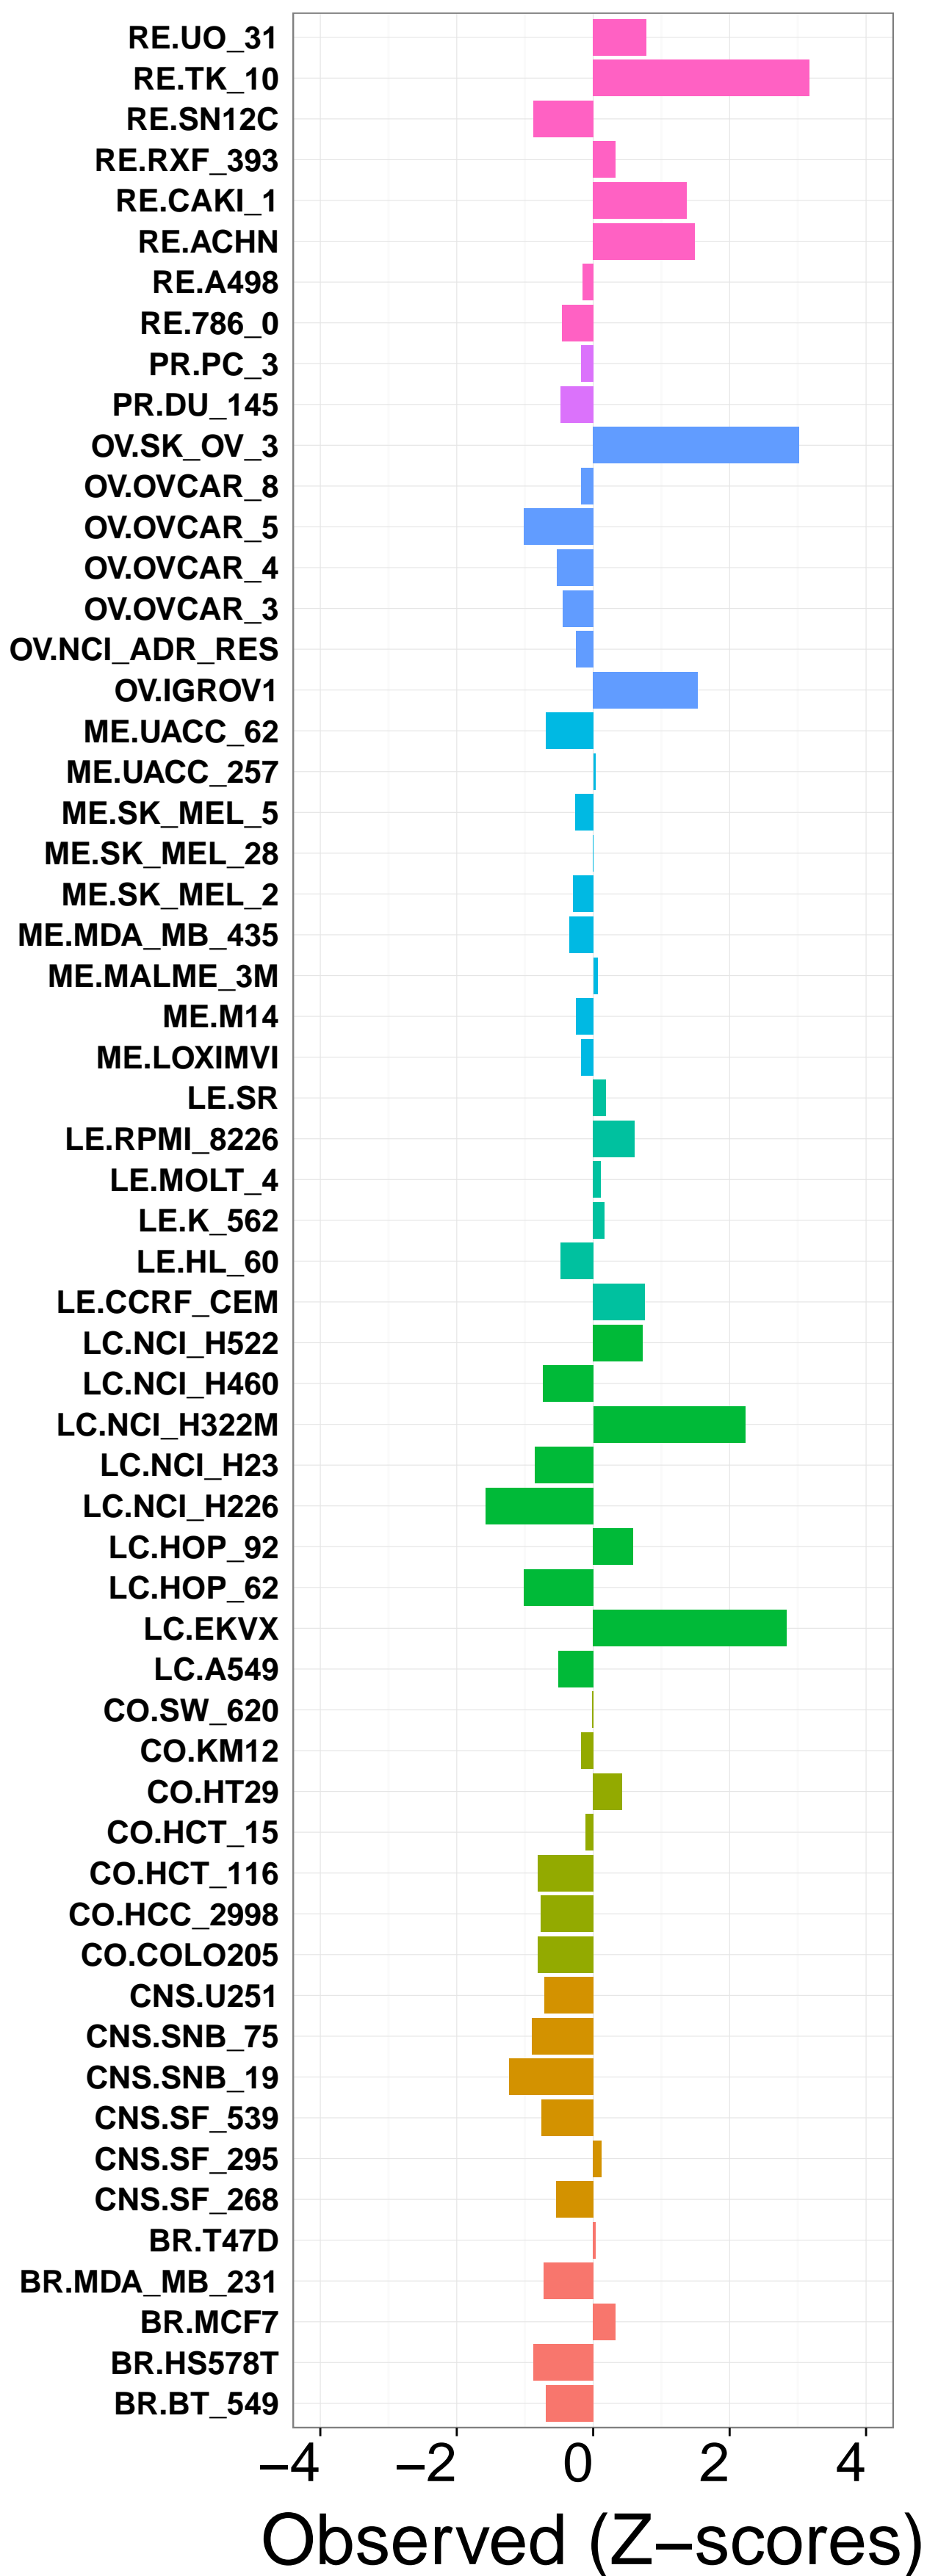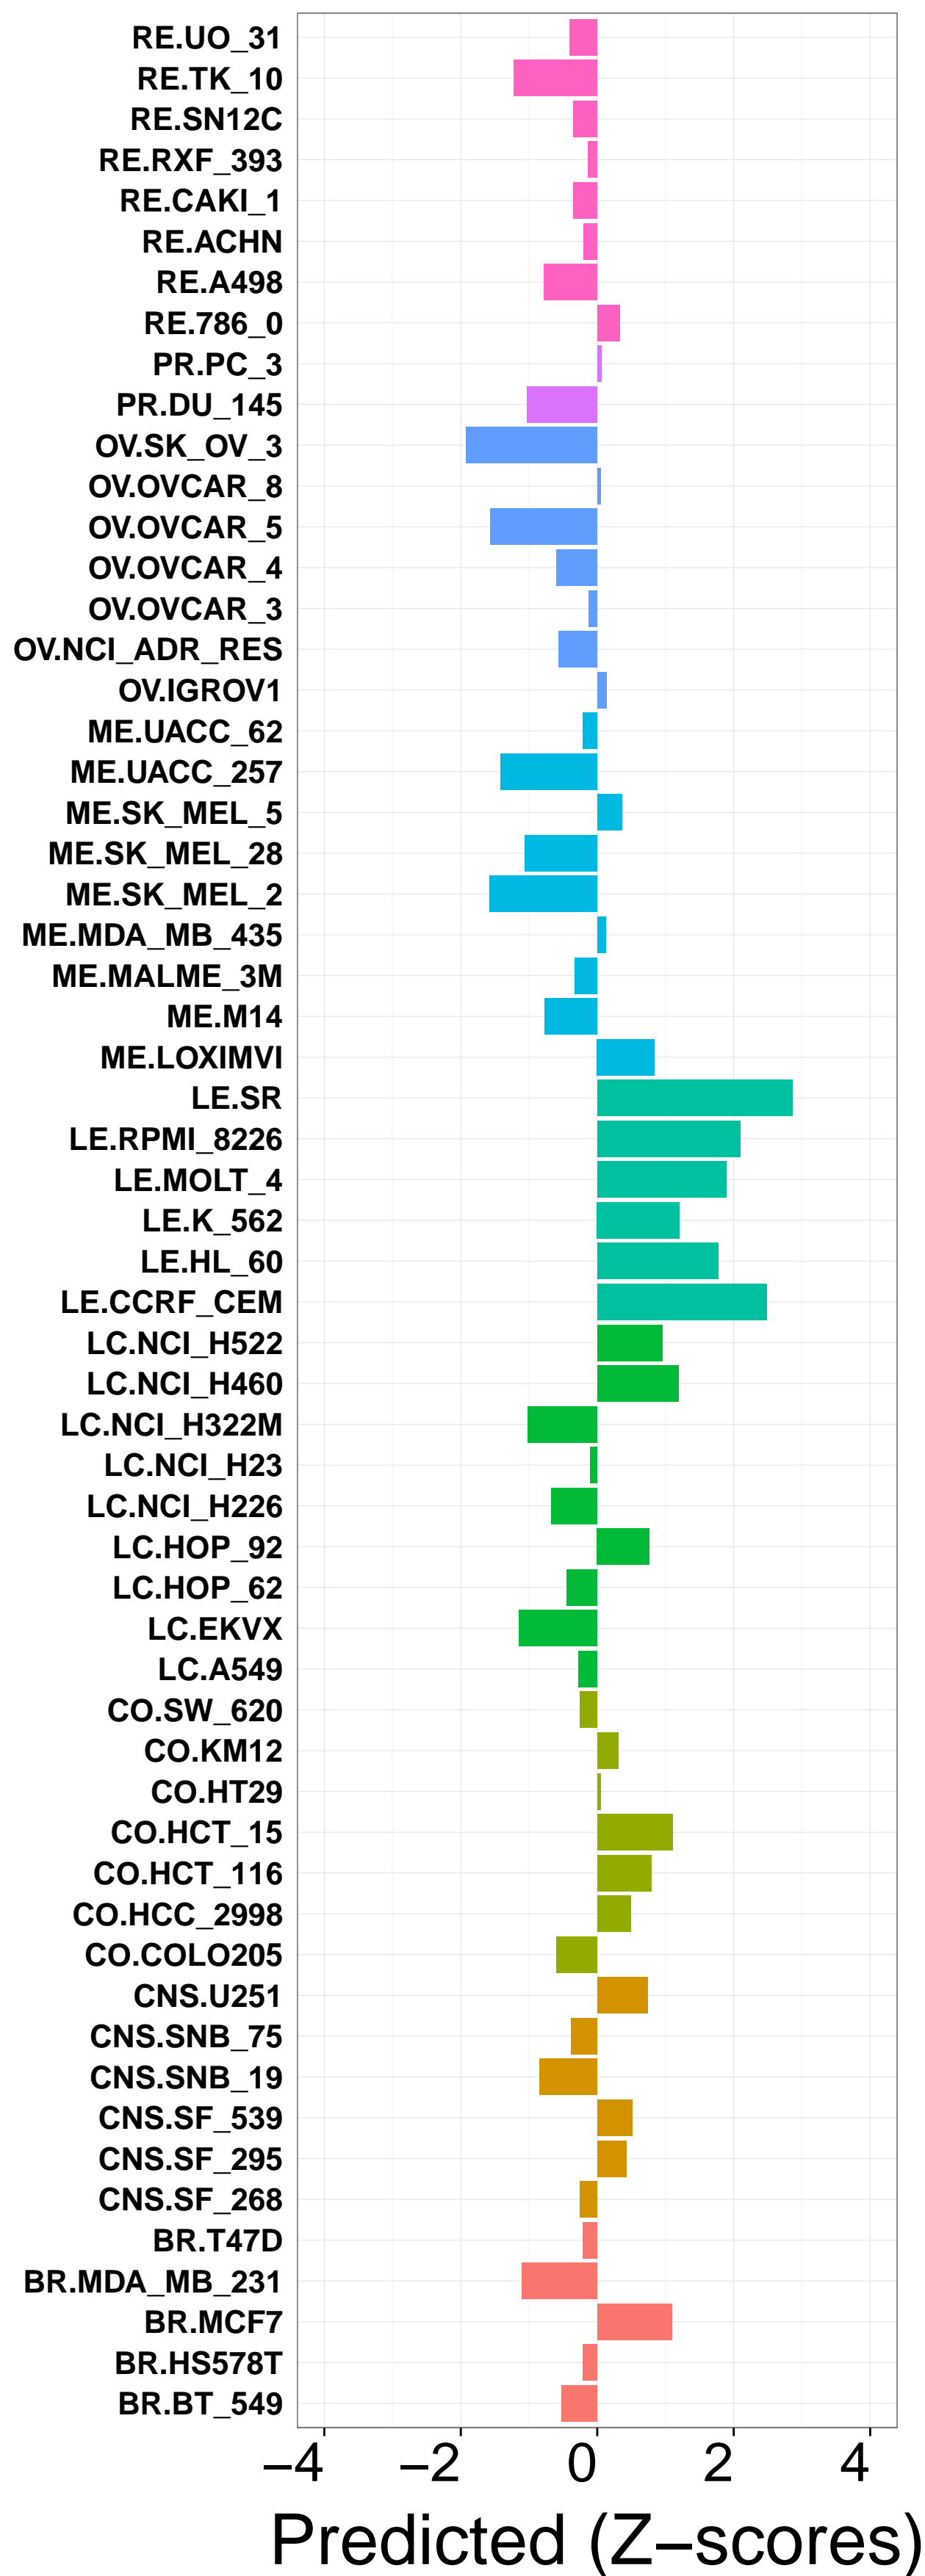

# NSC 749226, (LOCCO)

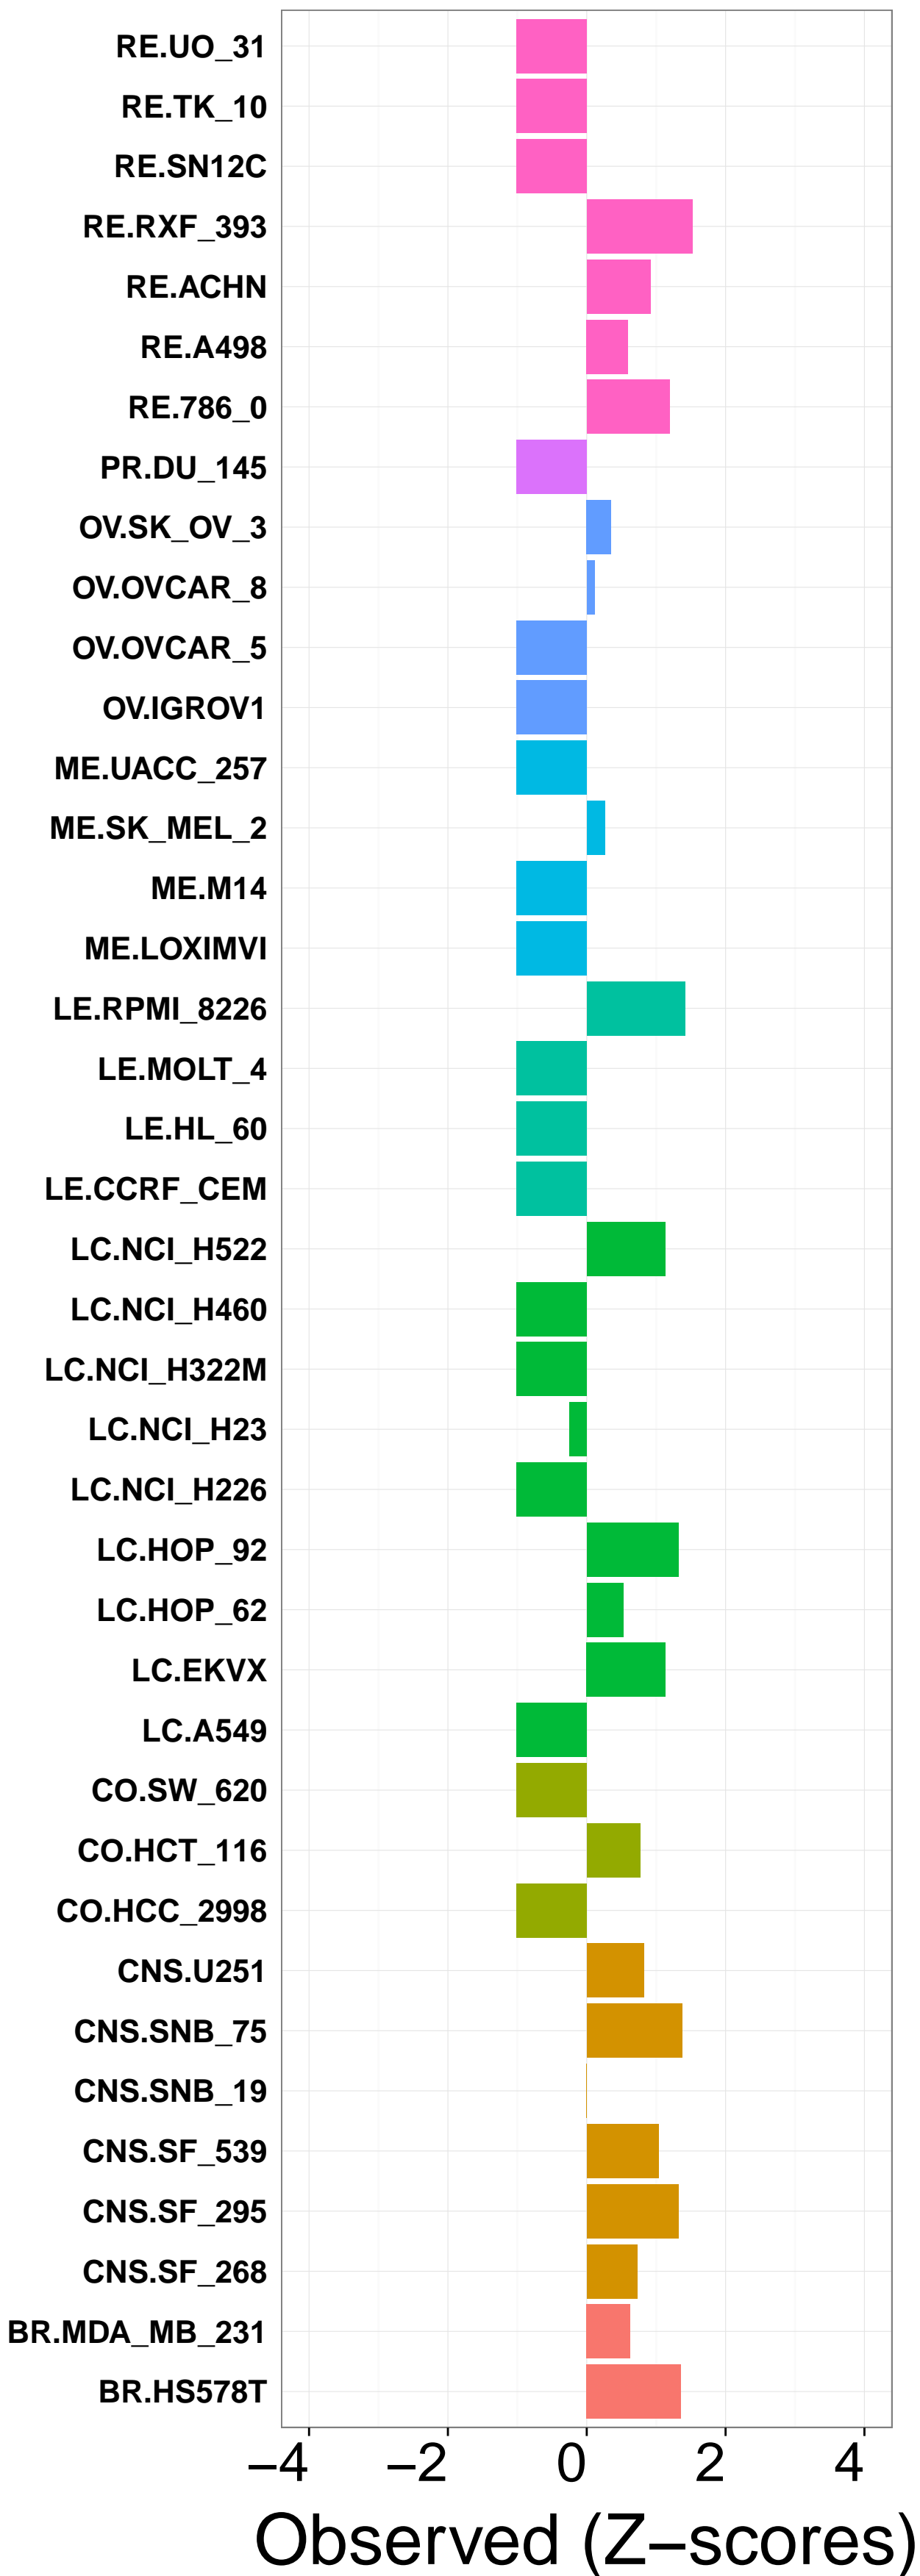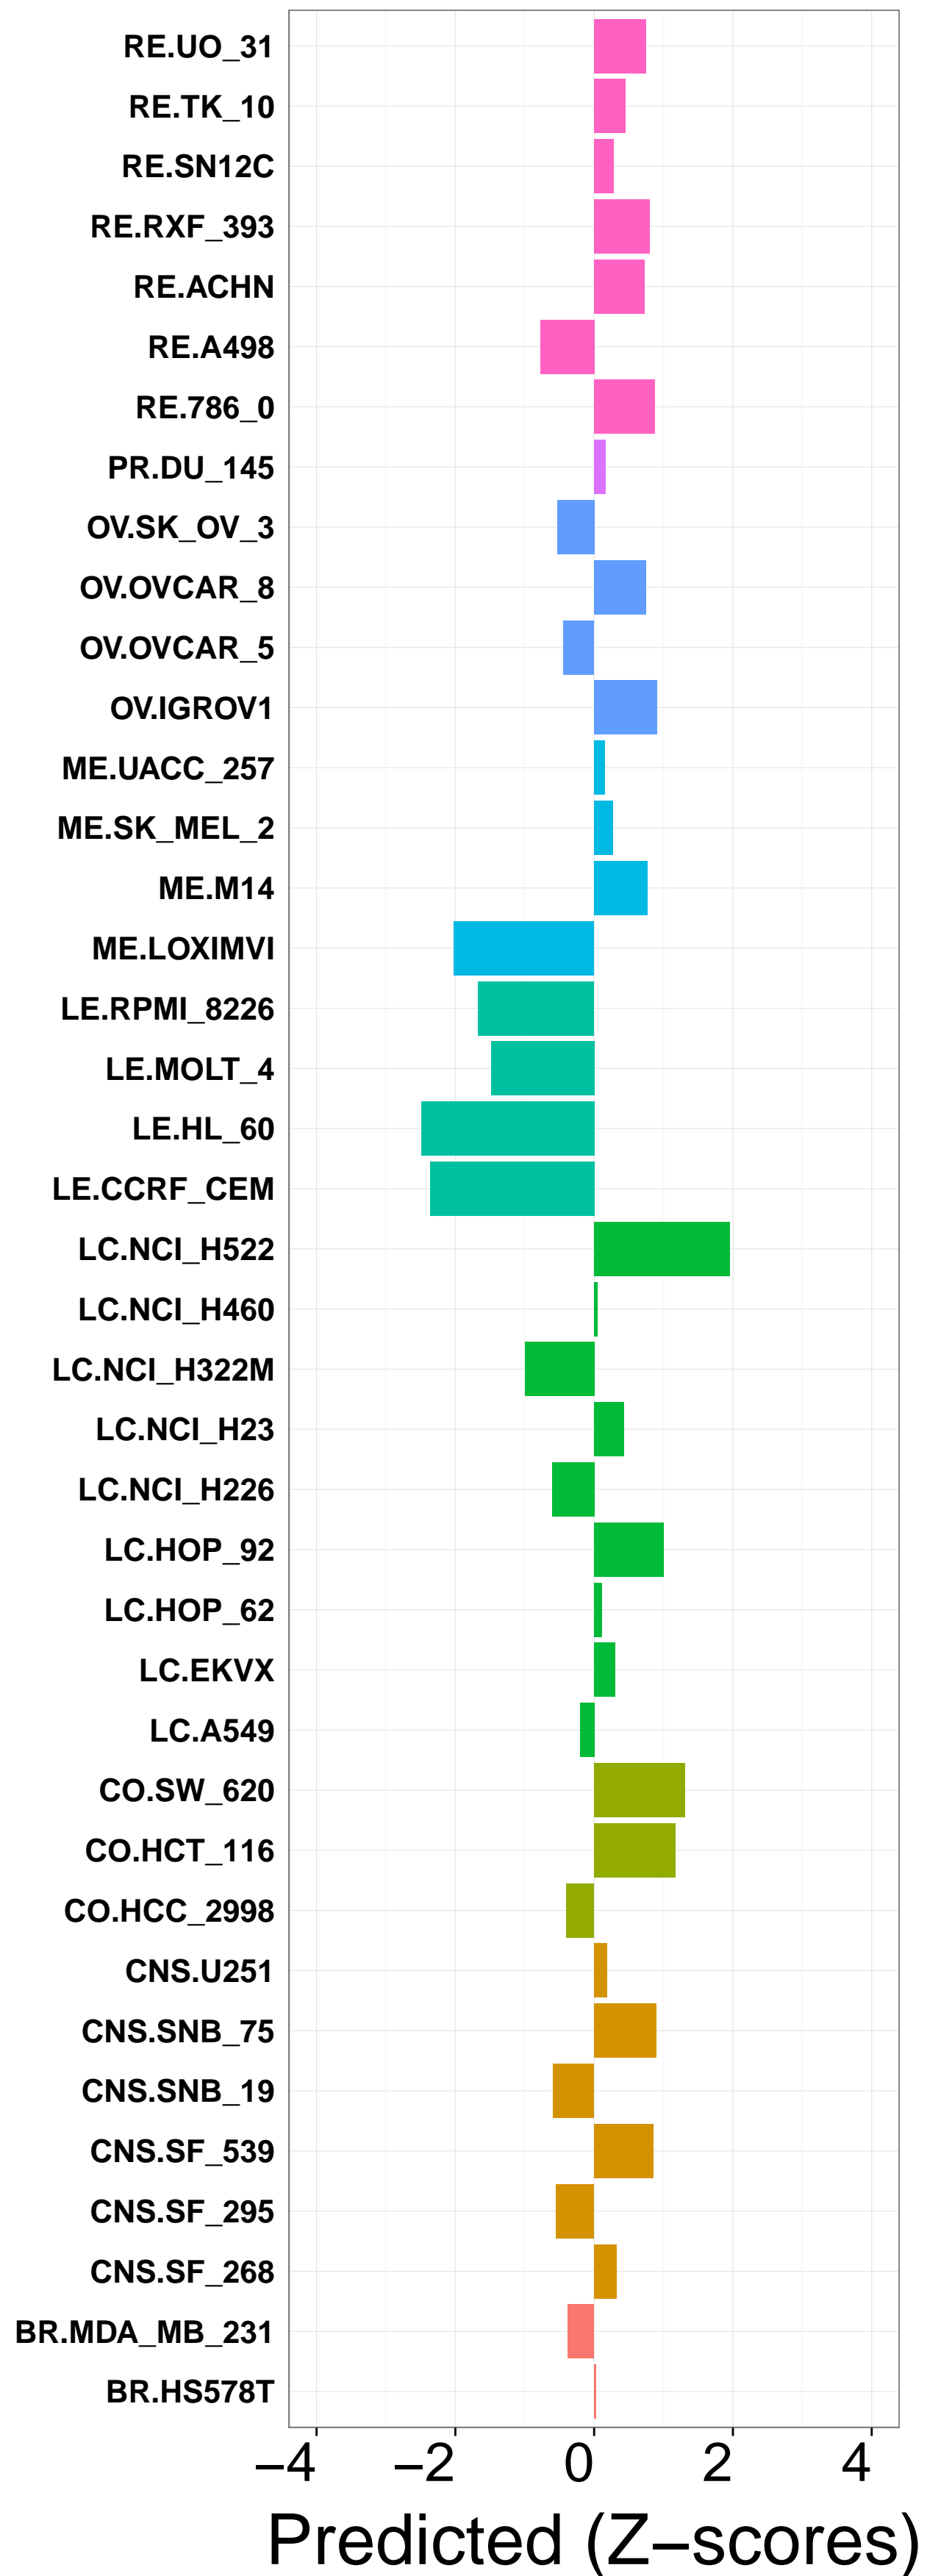

# NSC 755, Mercaptopurine (LOCCO)

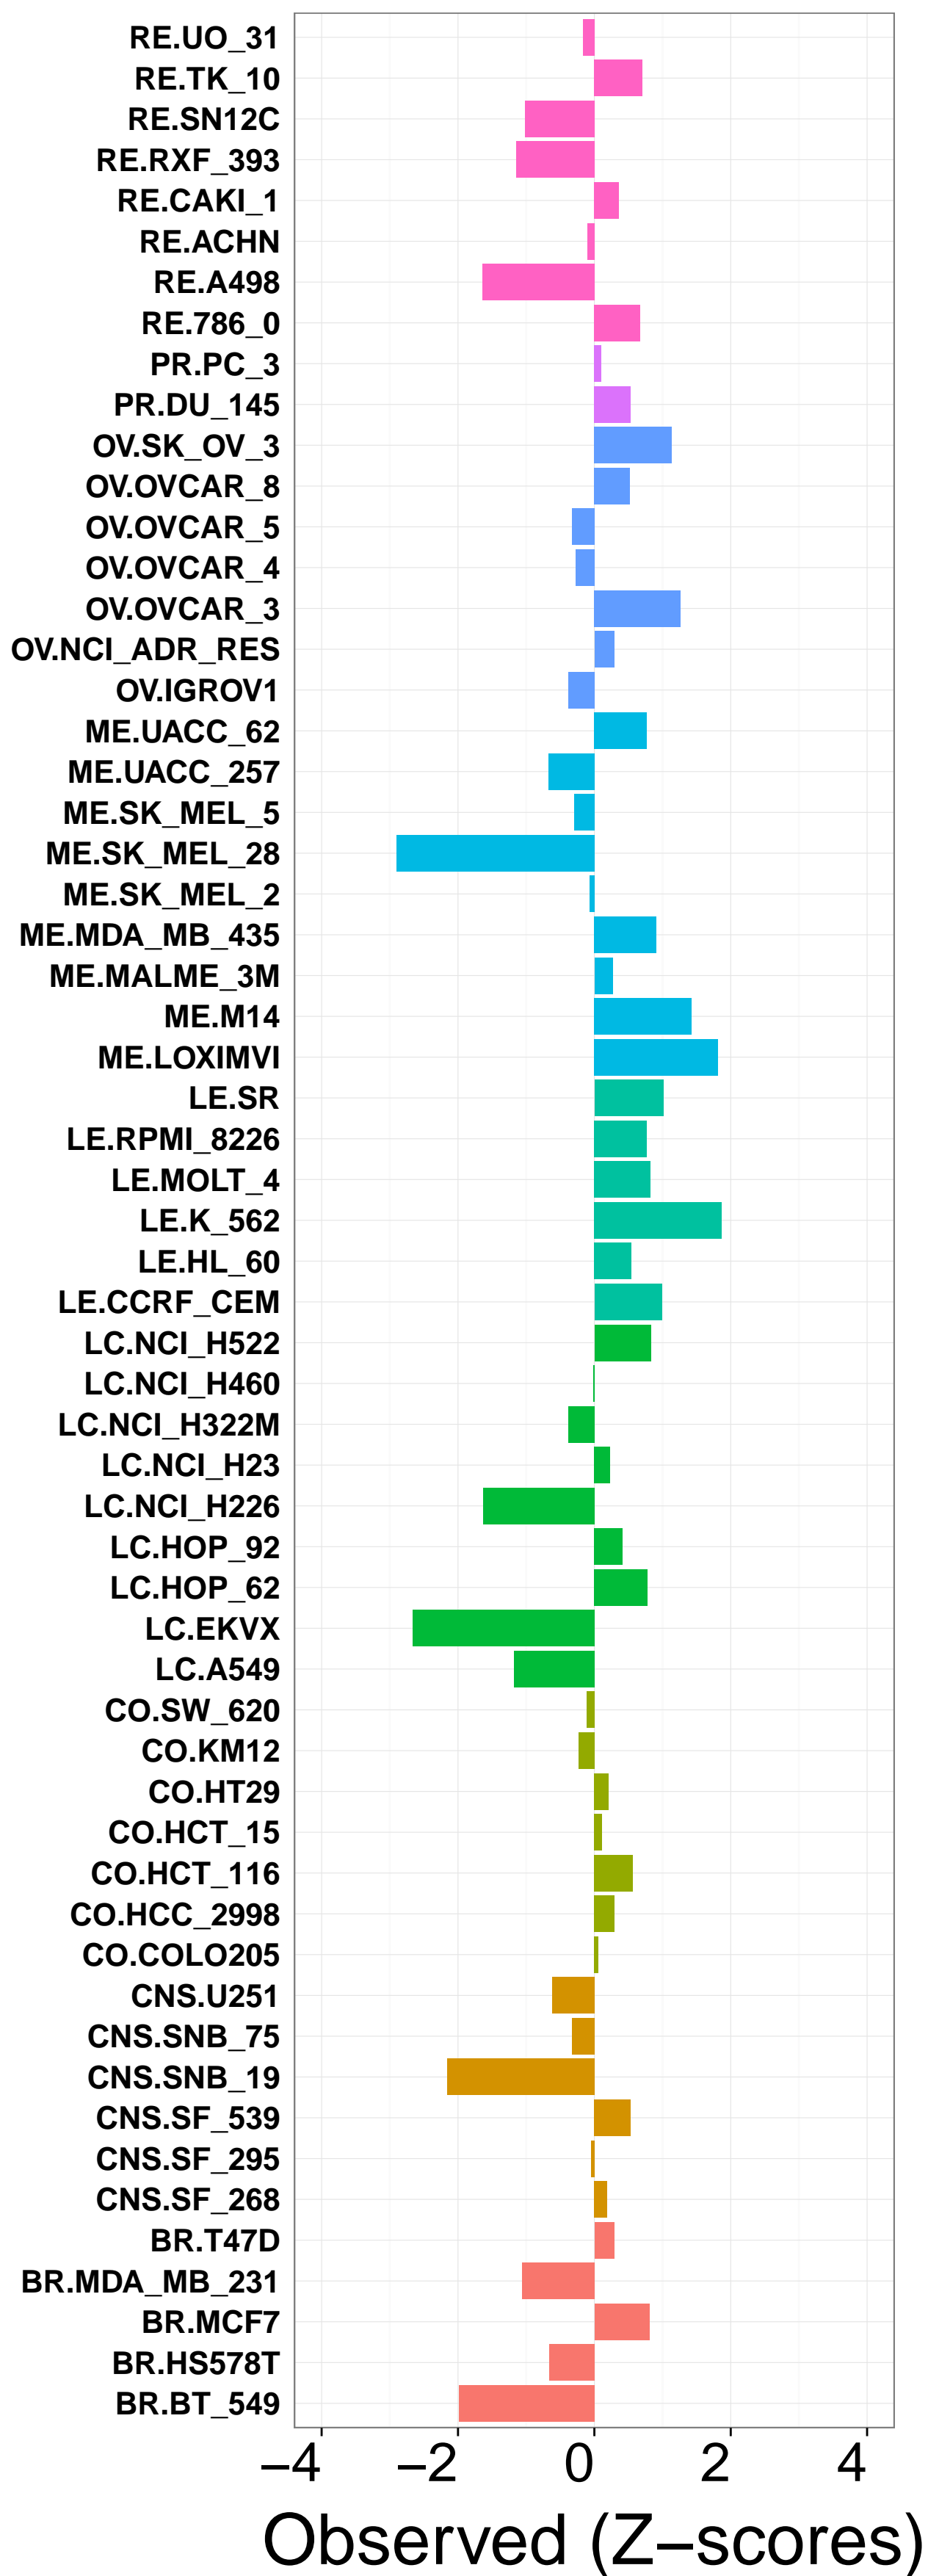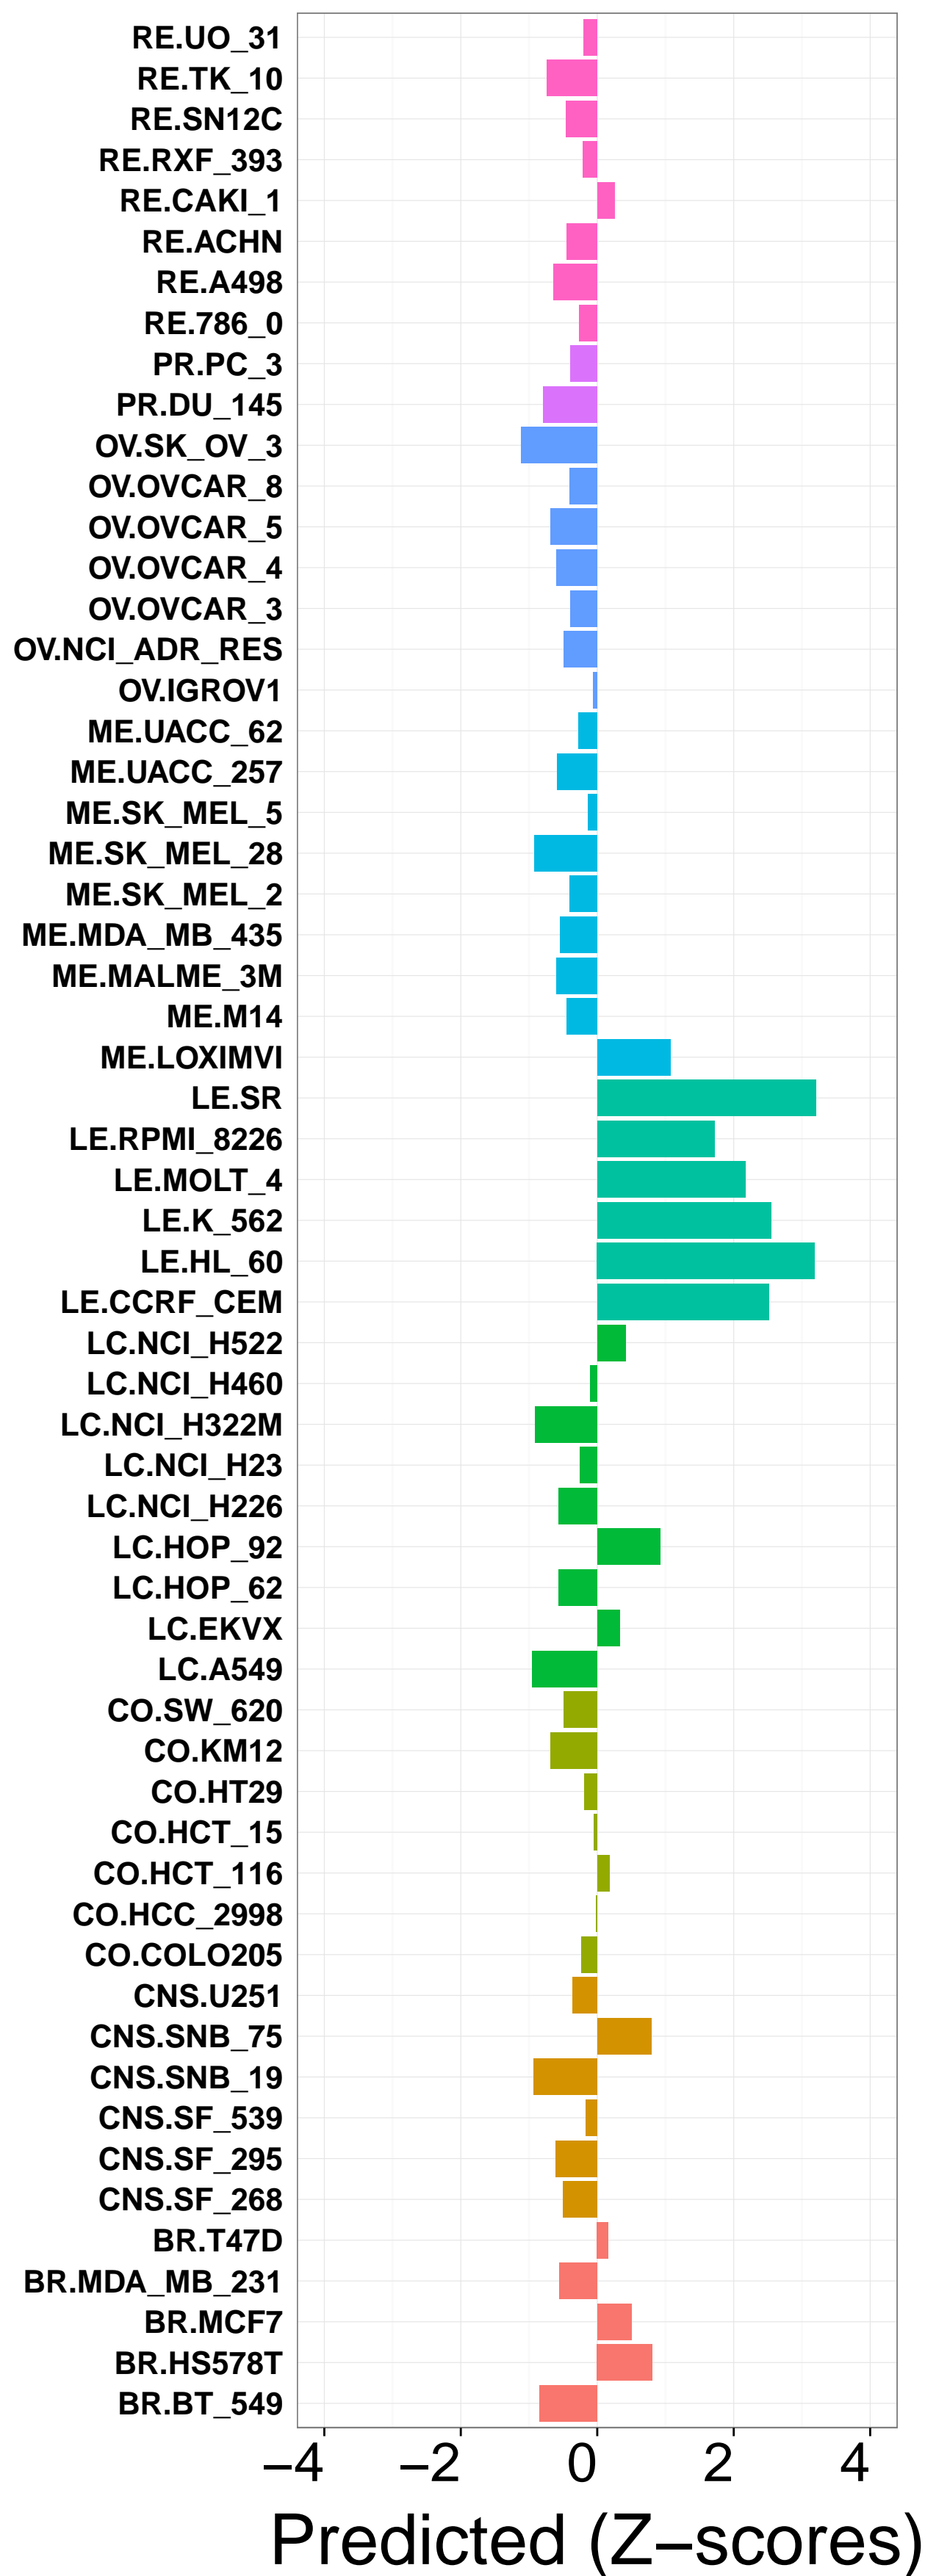

# NSC 762, Mechloroethamine\_Hydrochloride (LOCCO)

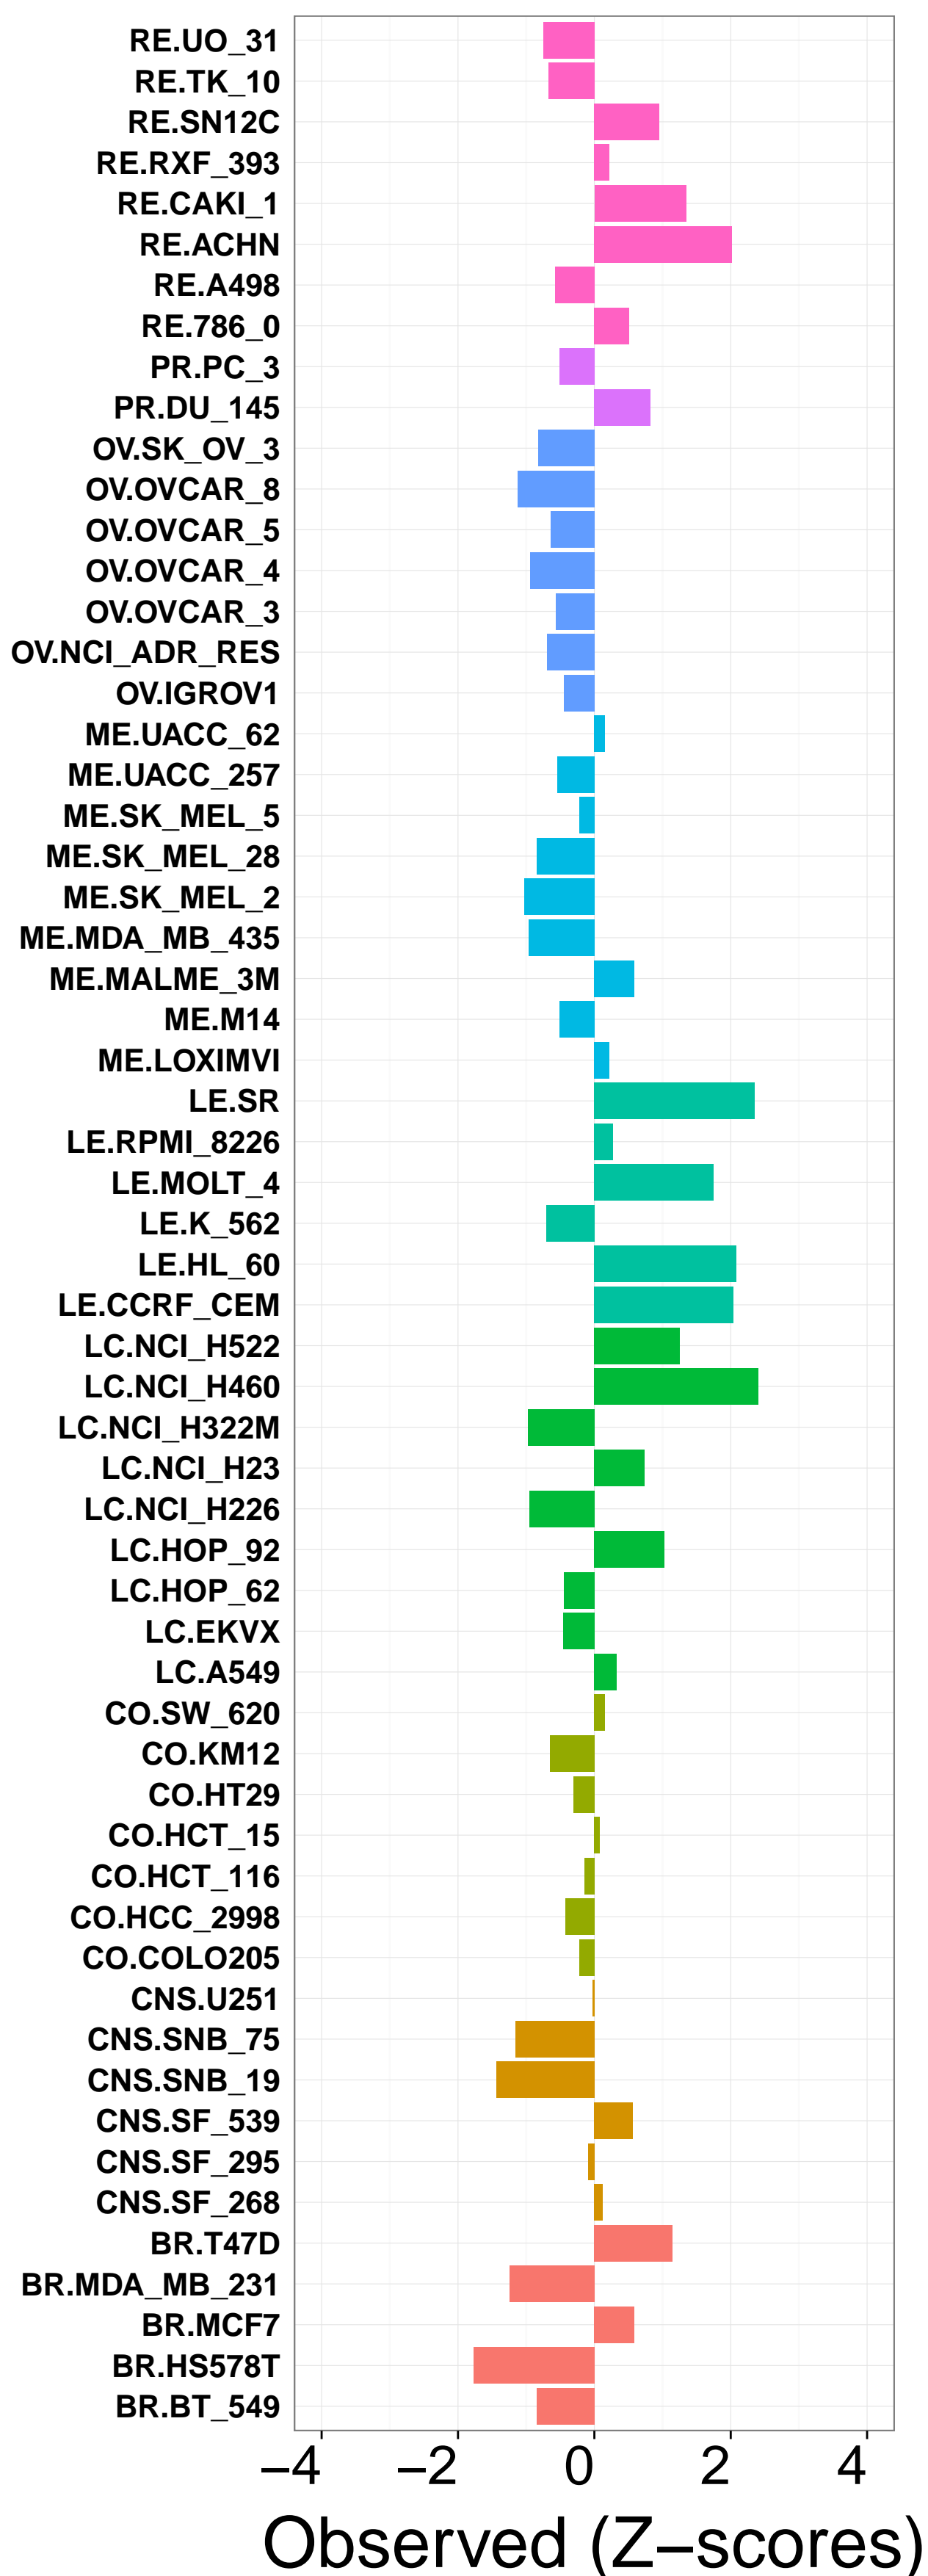

Observed (Z-scores)

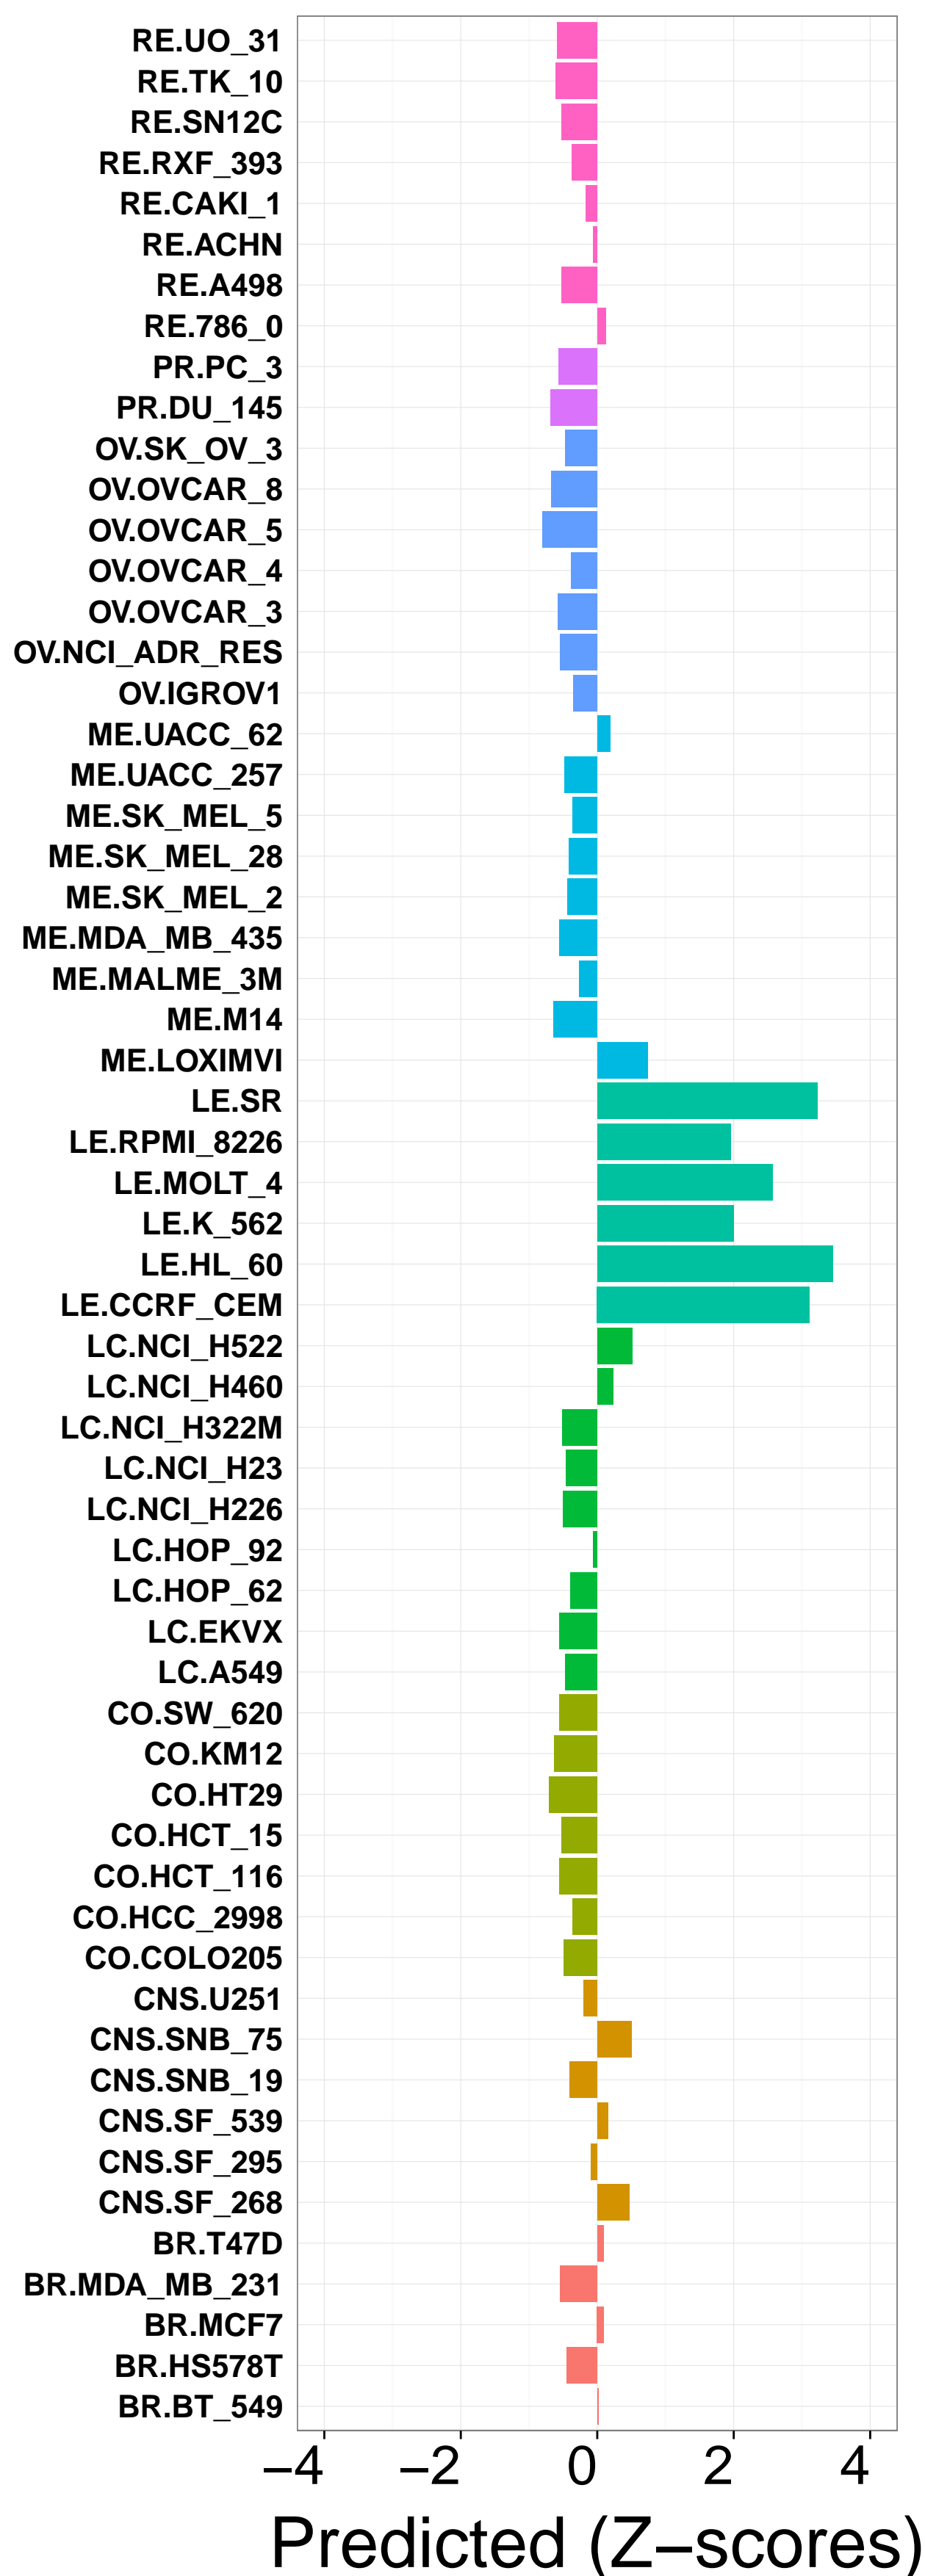

Predicted (Z-scores)

# NSC 105014, Cladribine (LOCO)

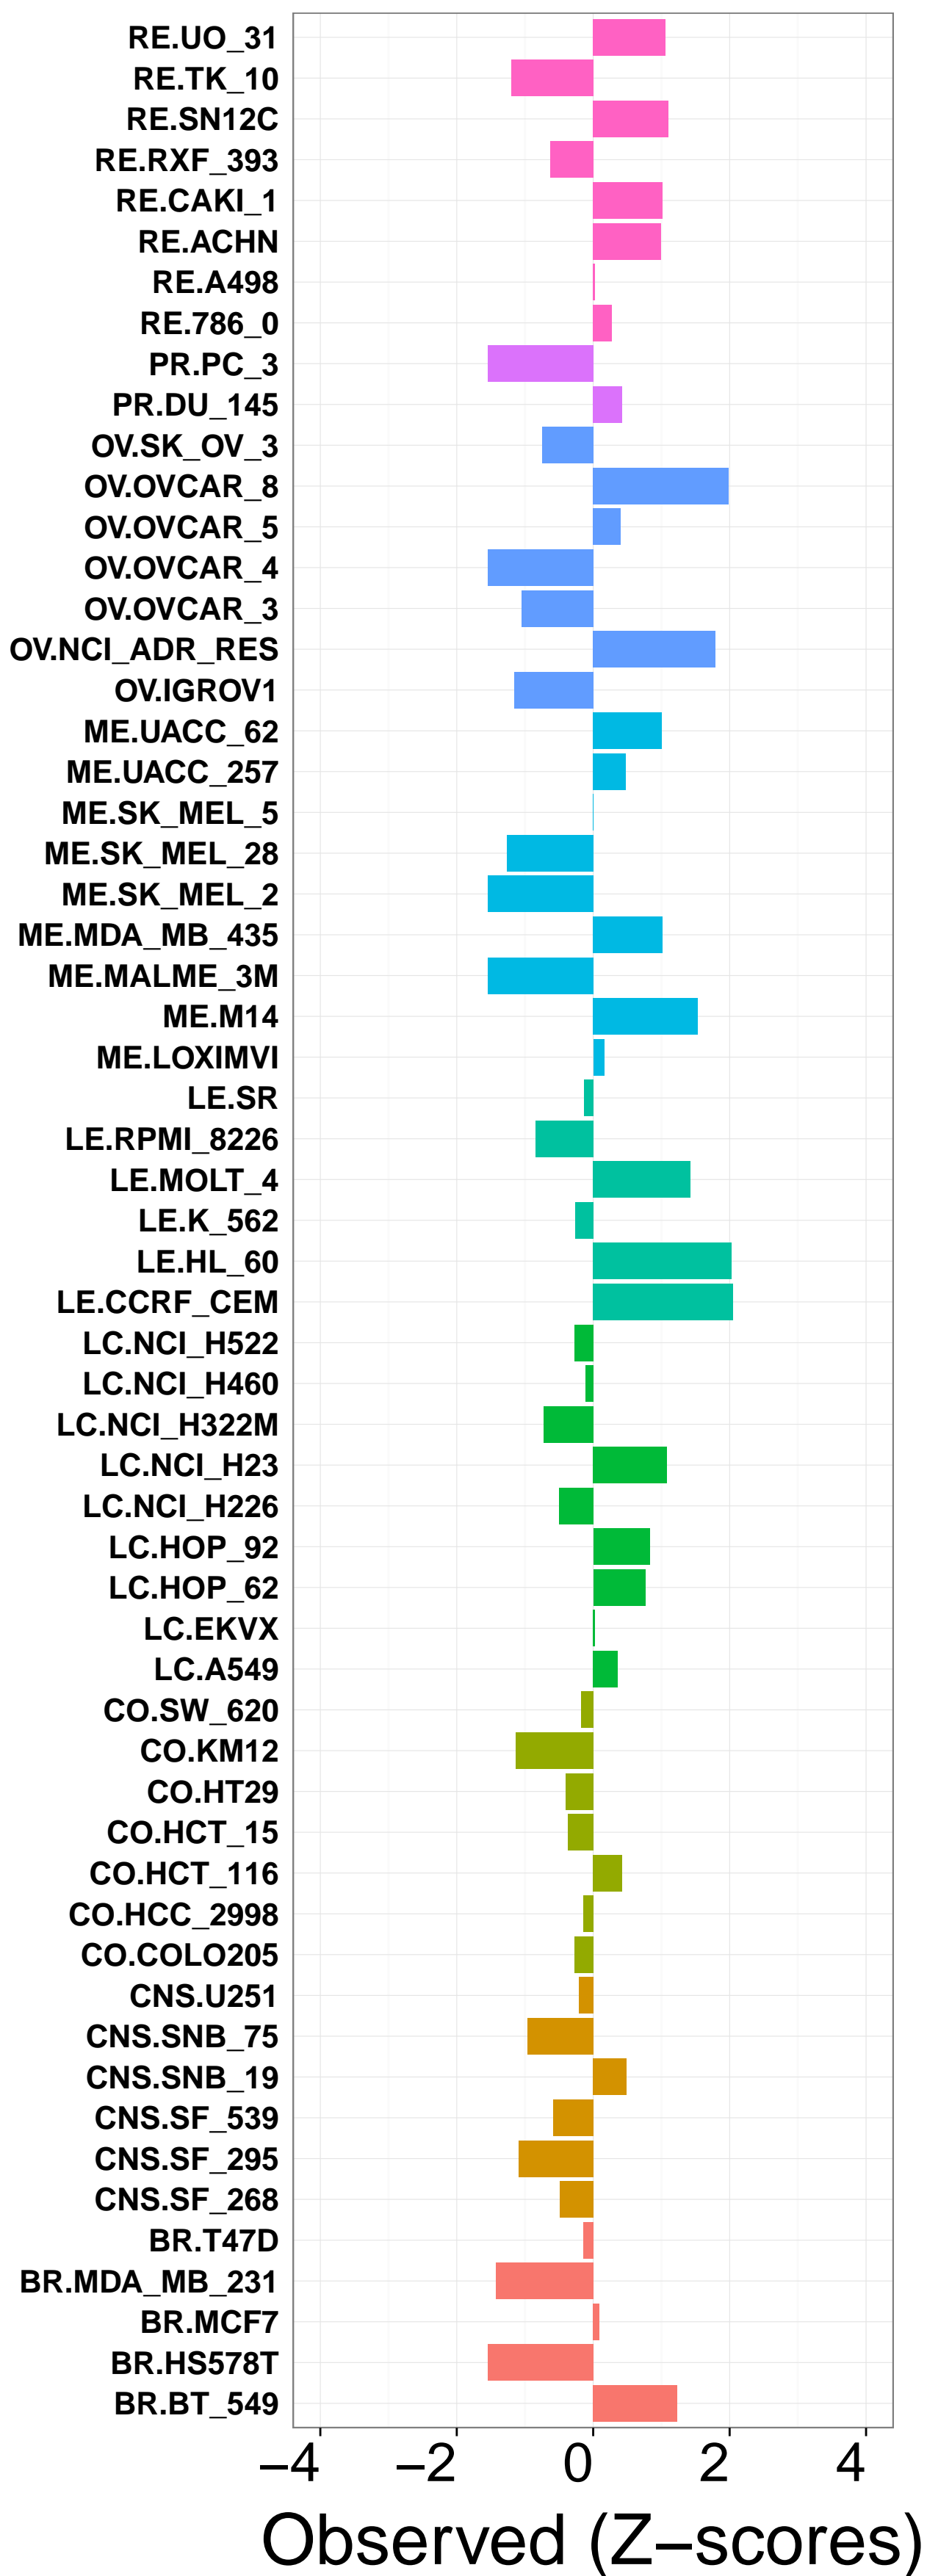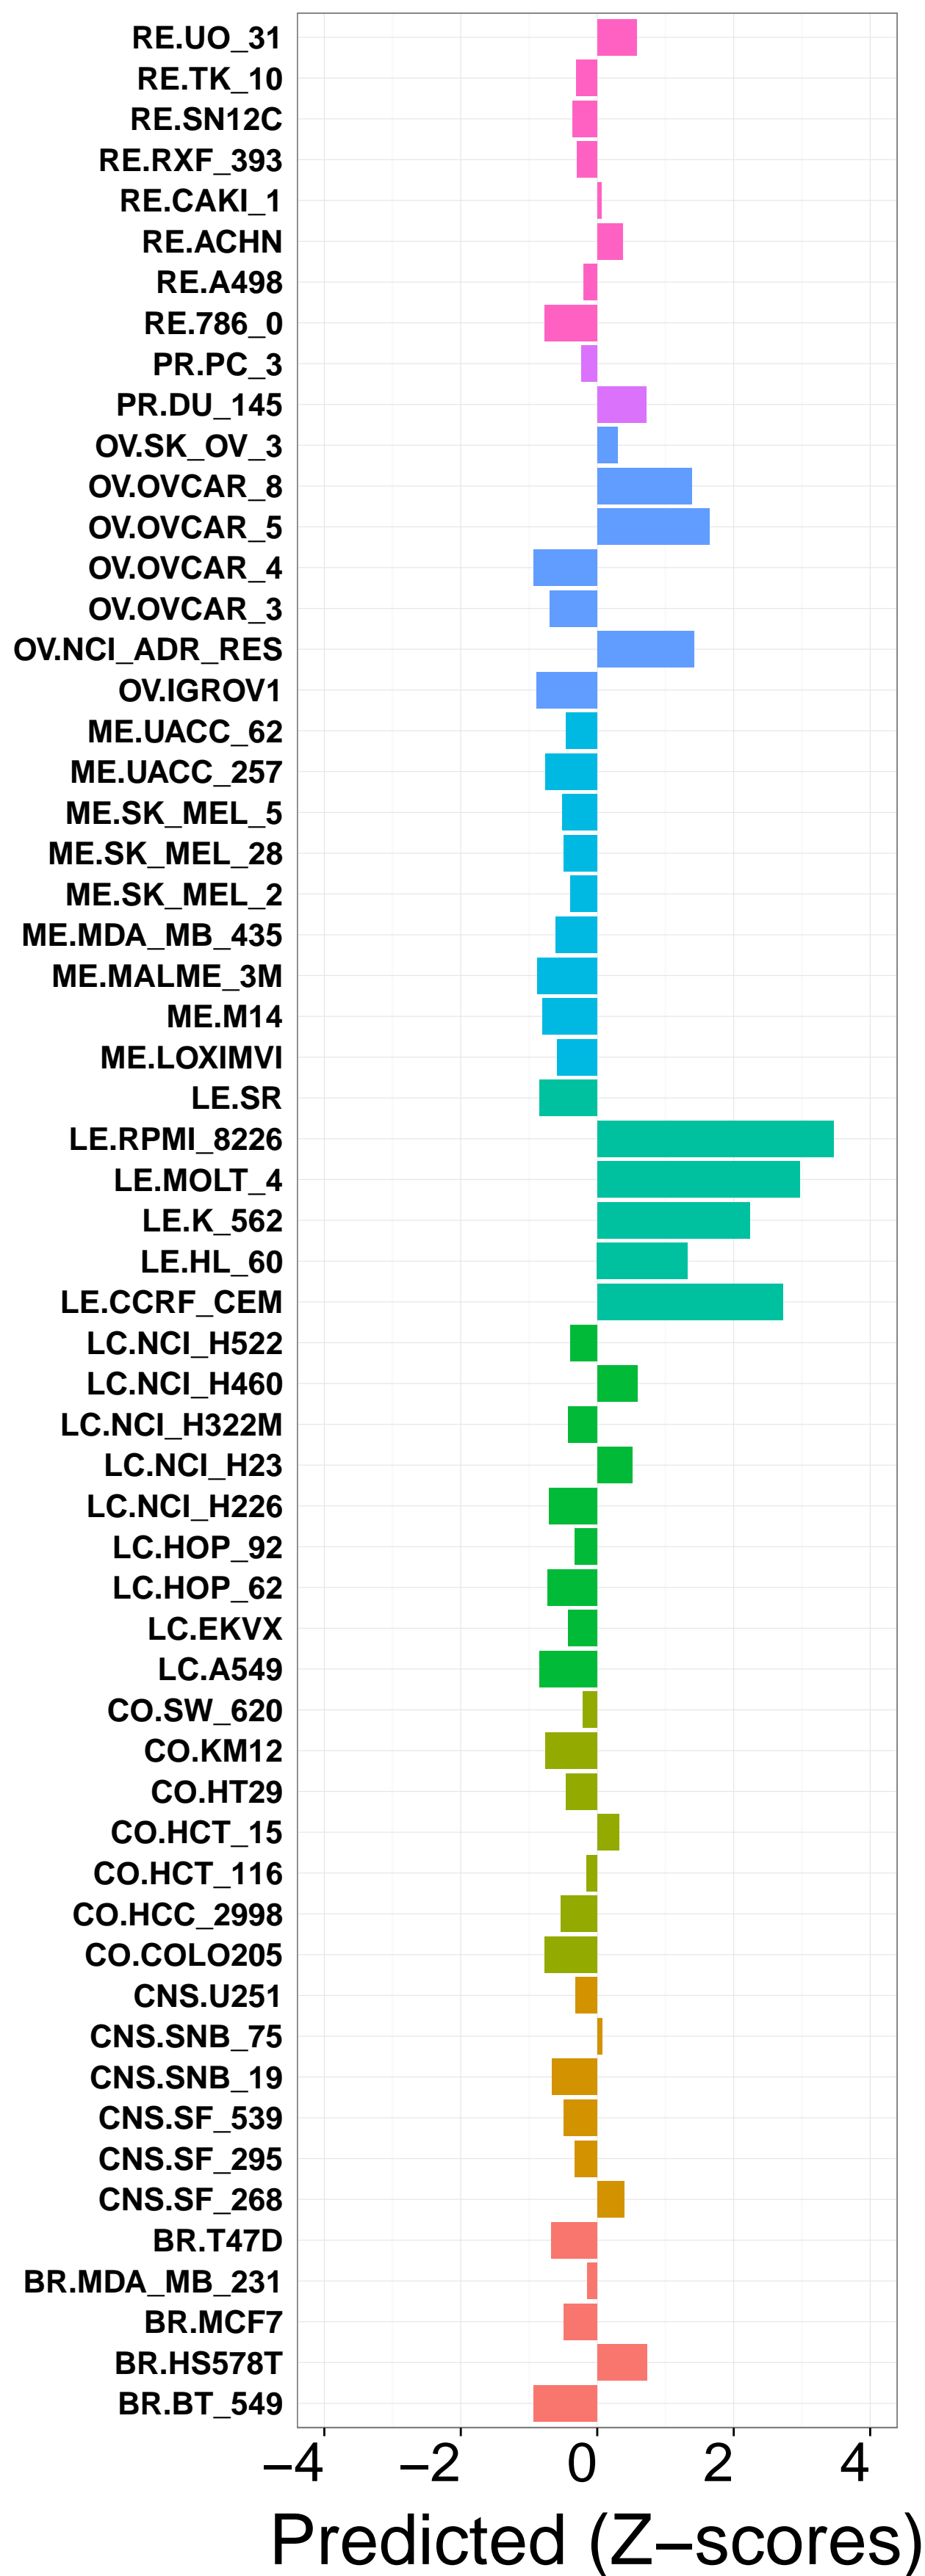



# NSC 118218, Fludarabine (LOCO)

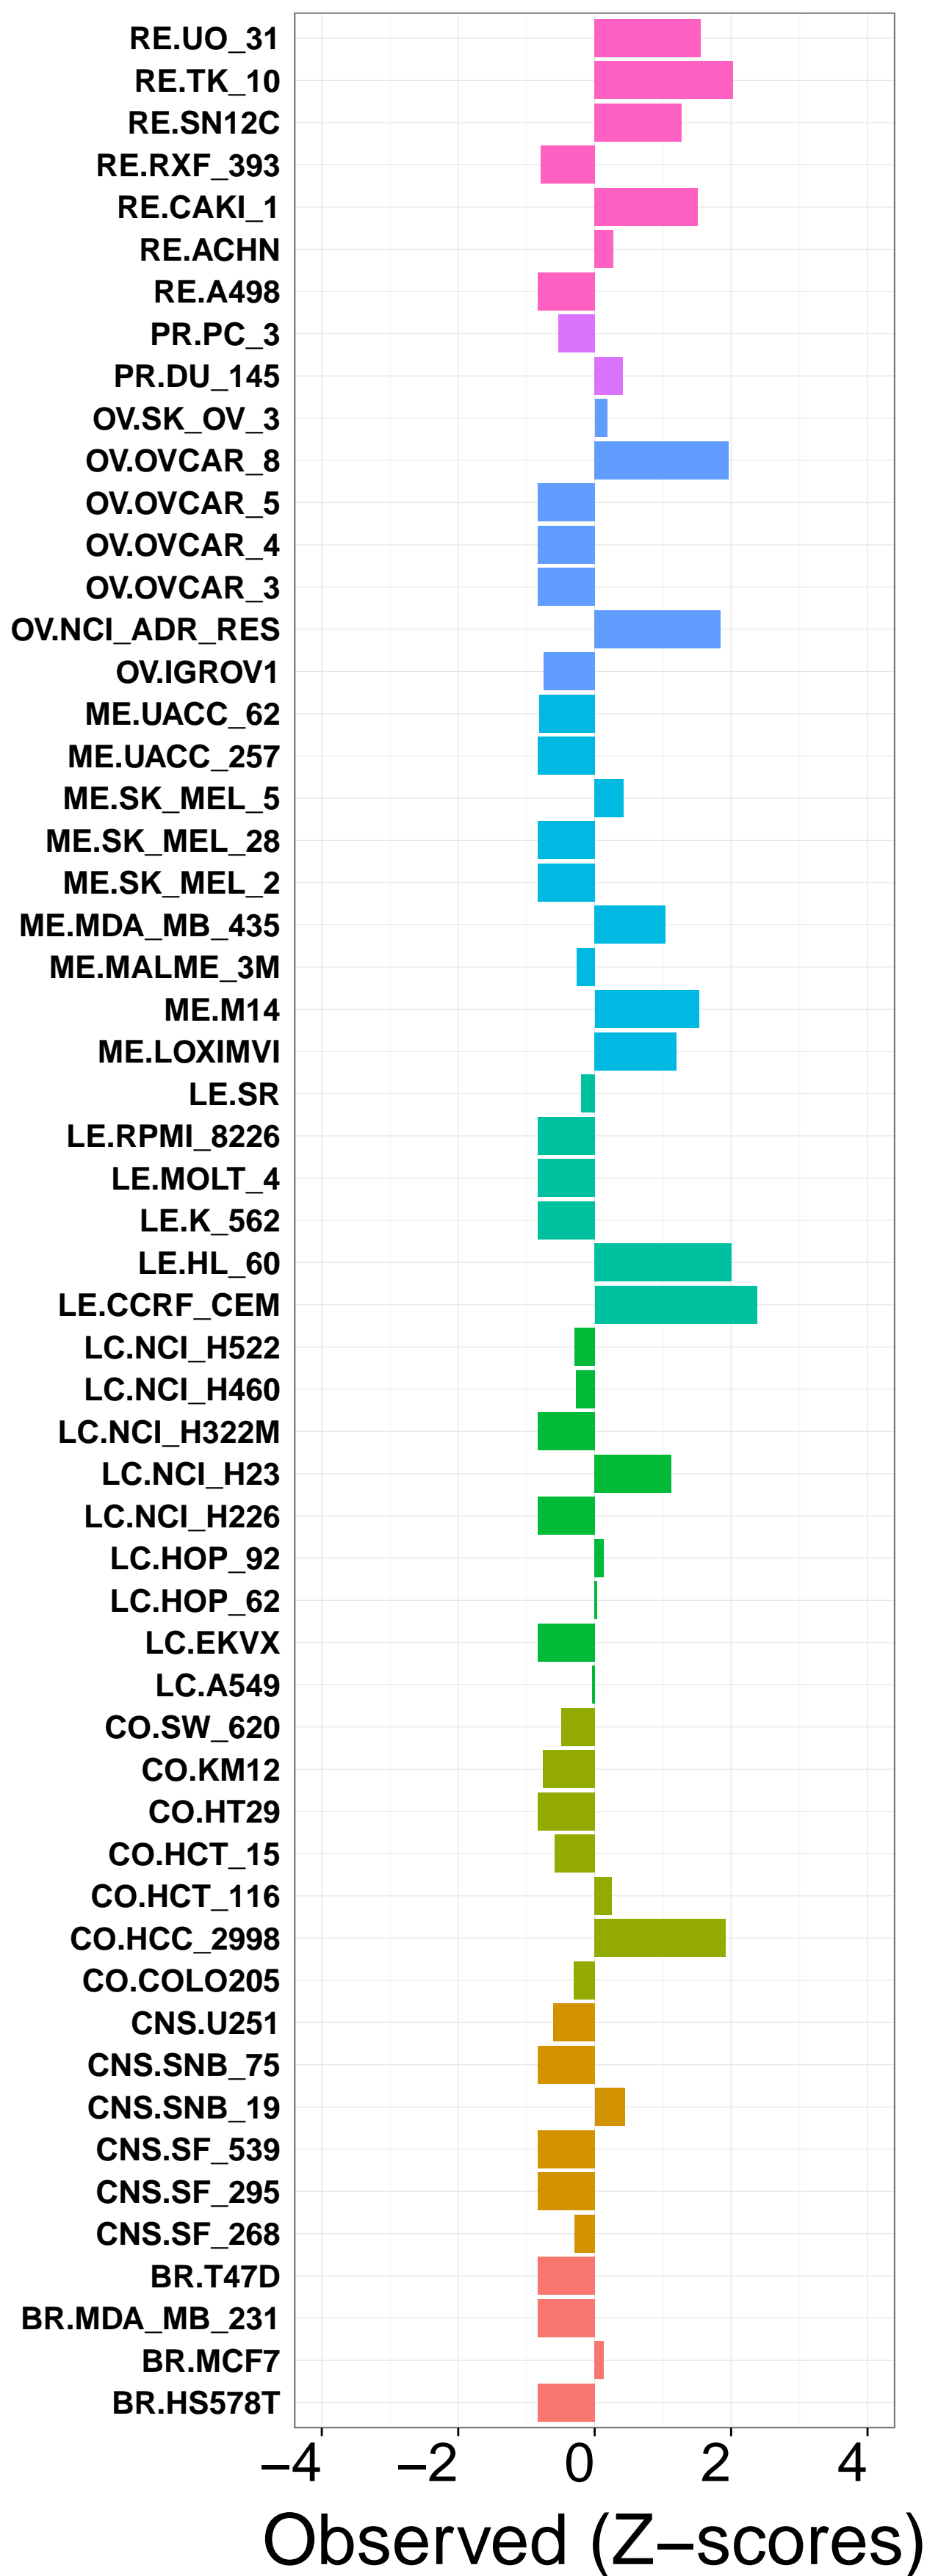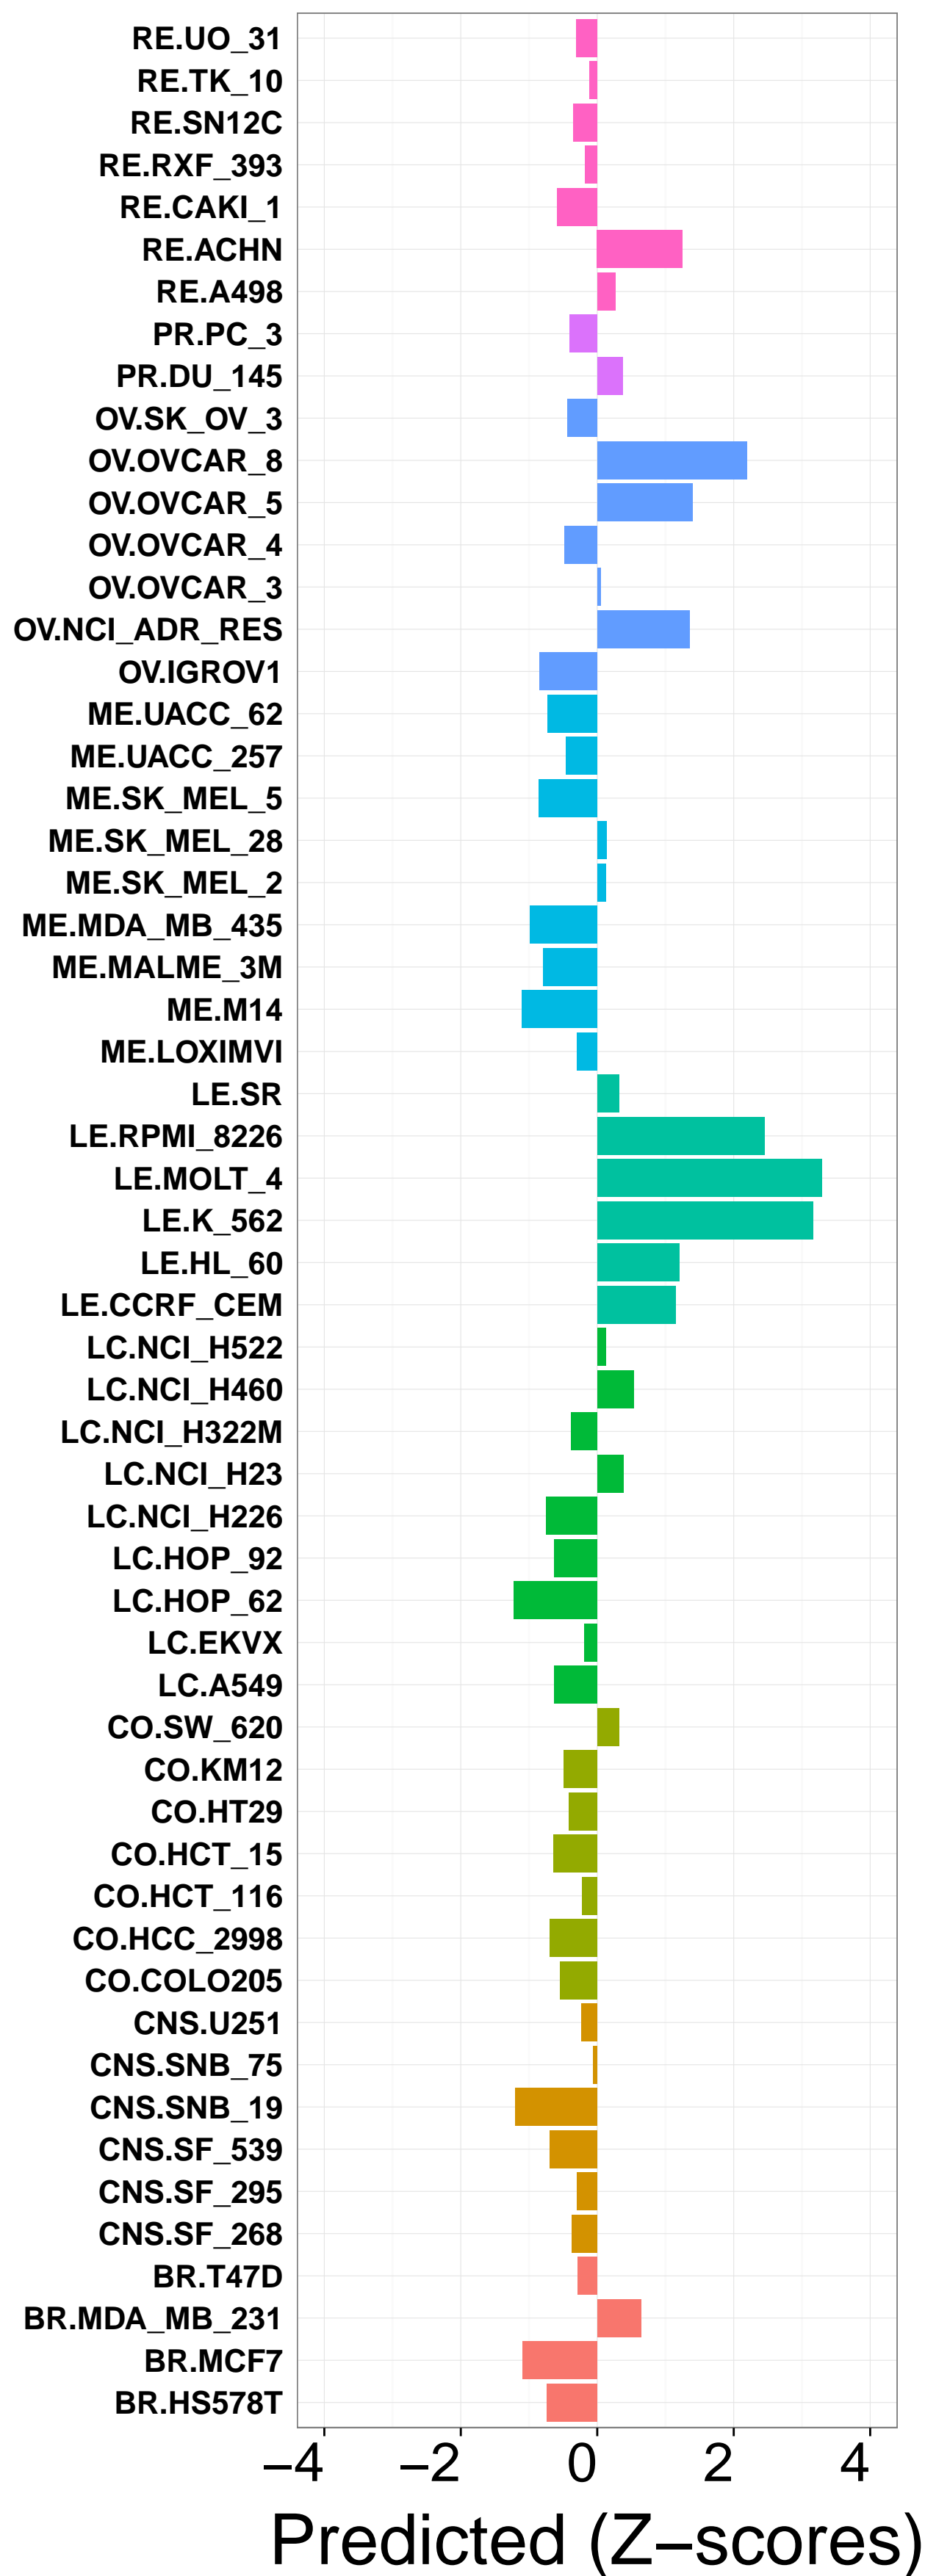

# NSC 122819, Teniposide (LOCO)

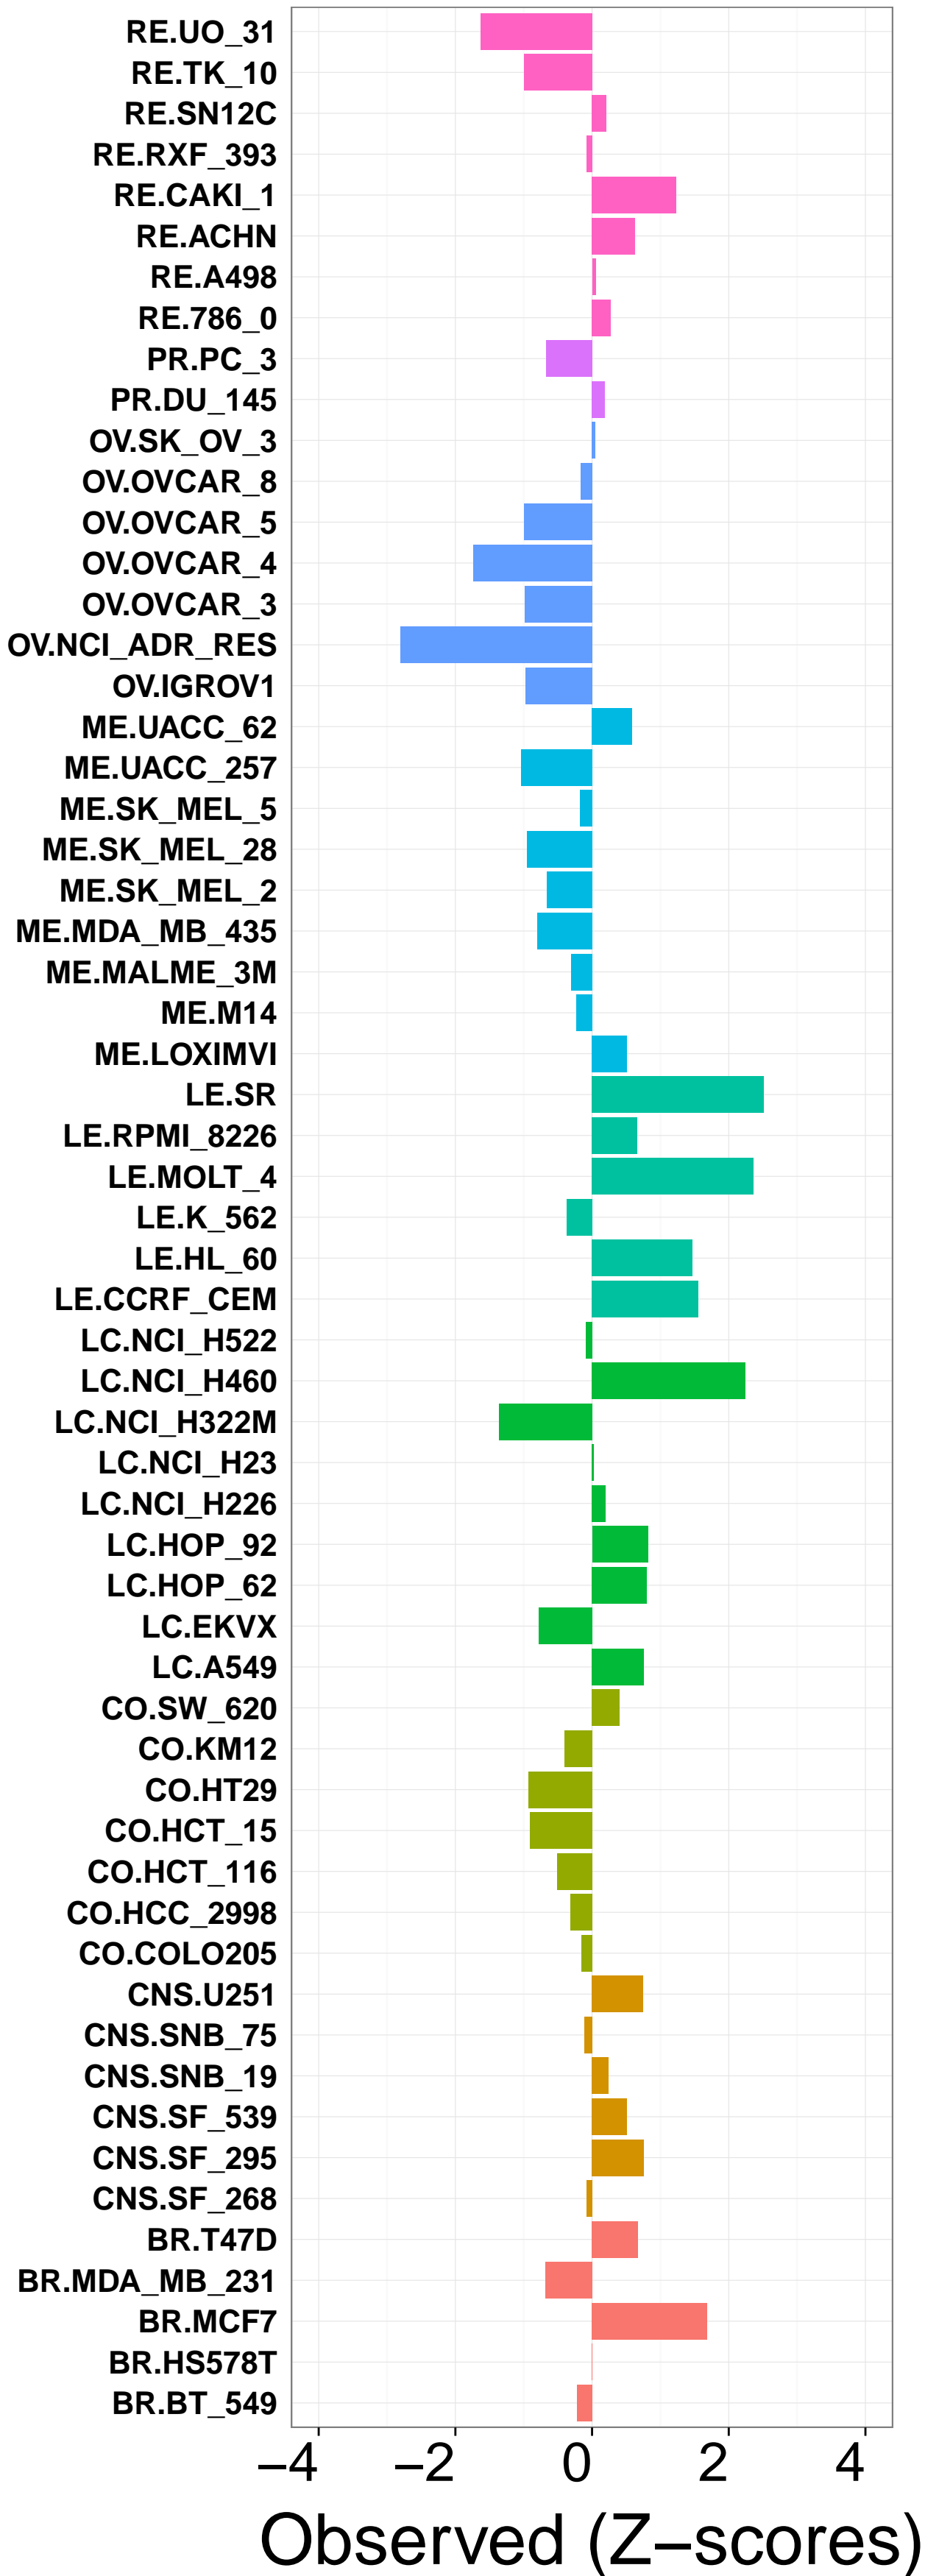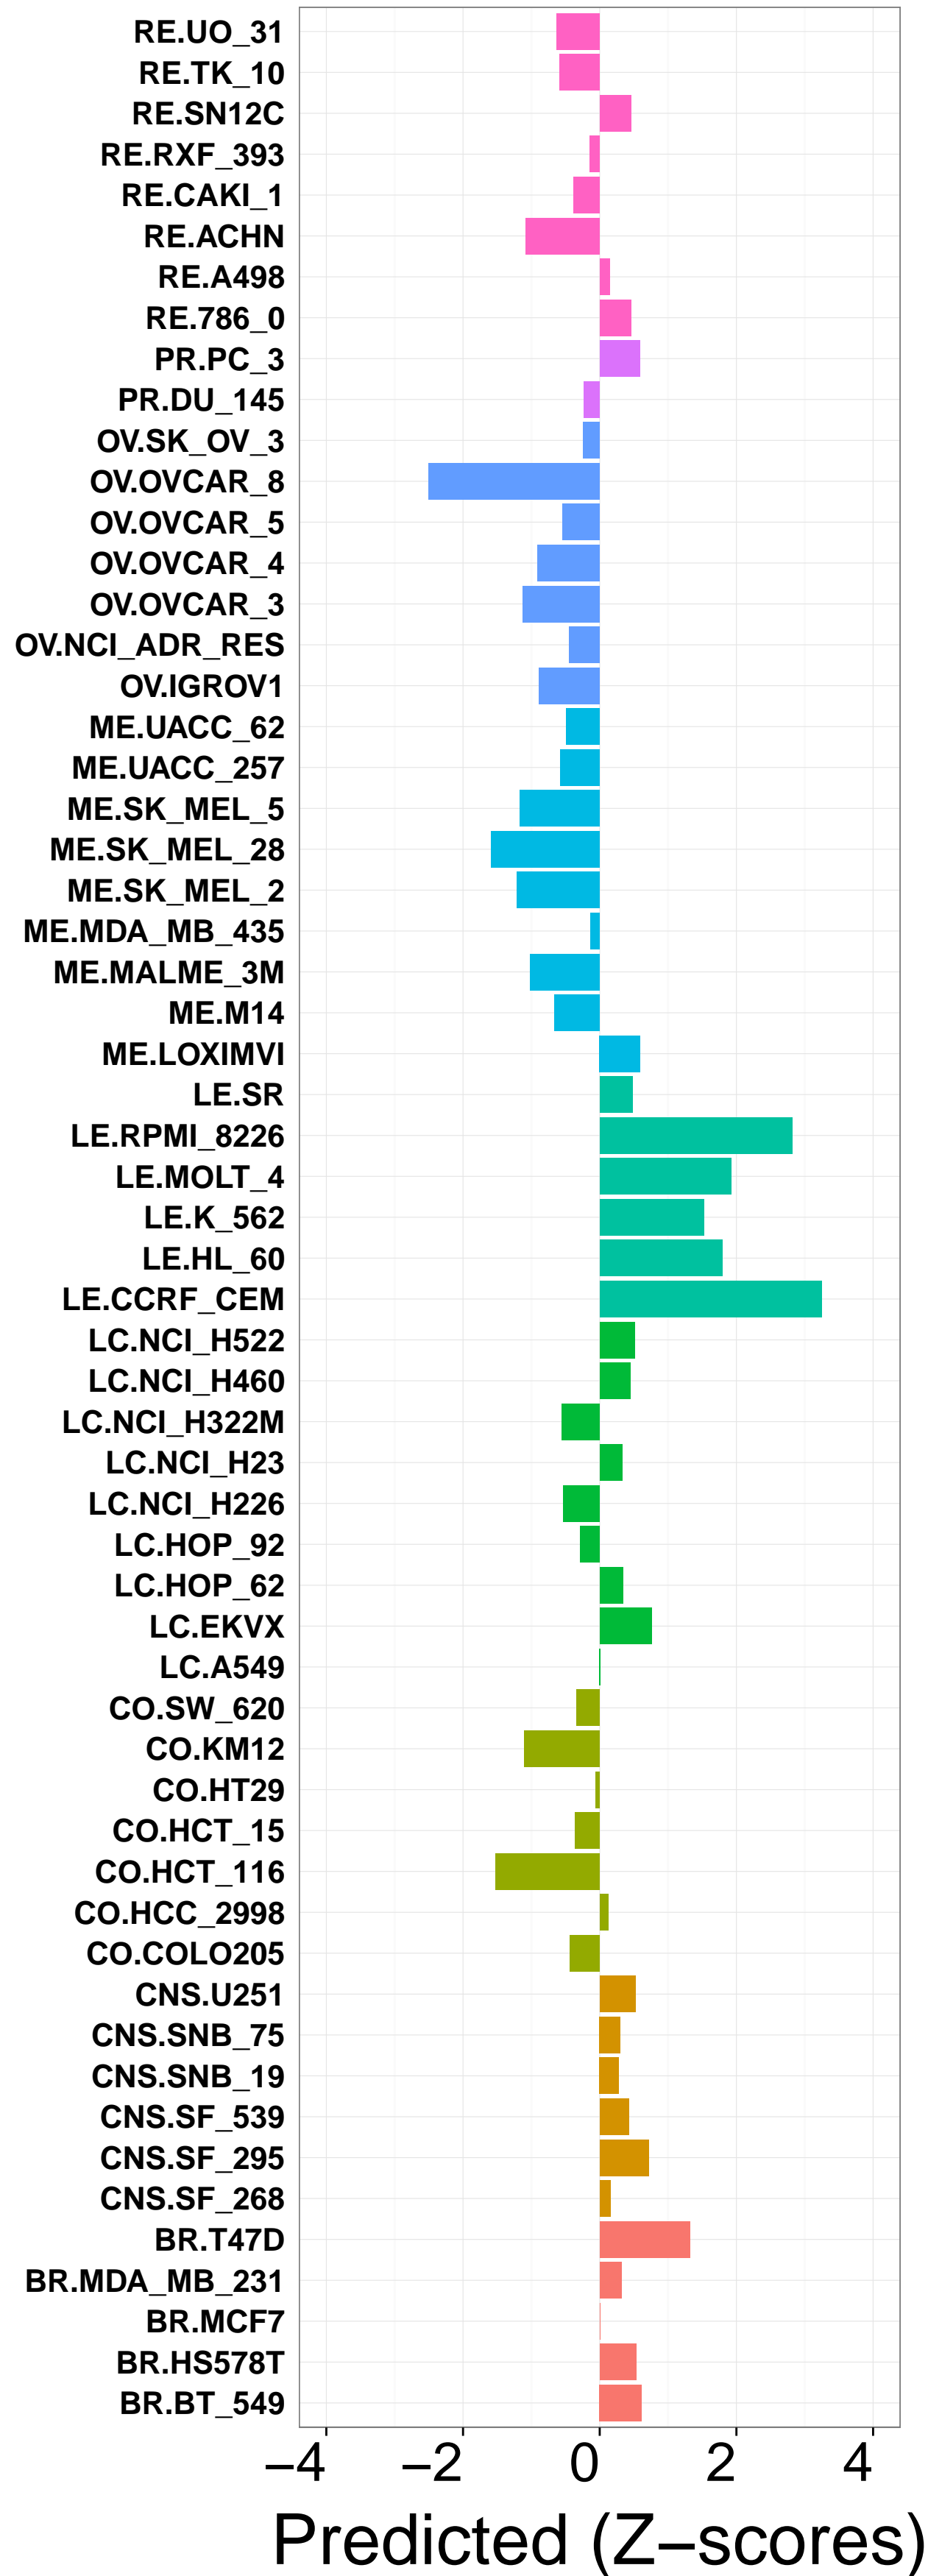

# NSC 123127, Doxorubicin\_Hydrochloride (LOCO)

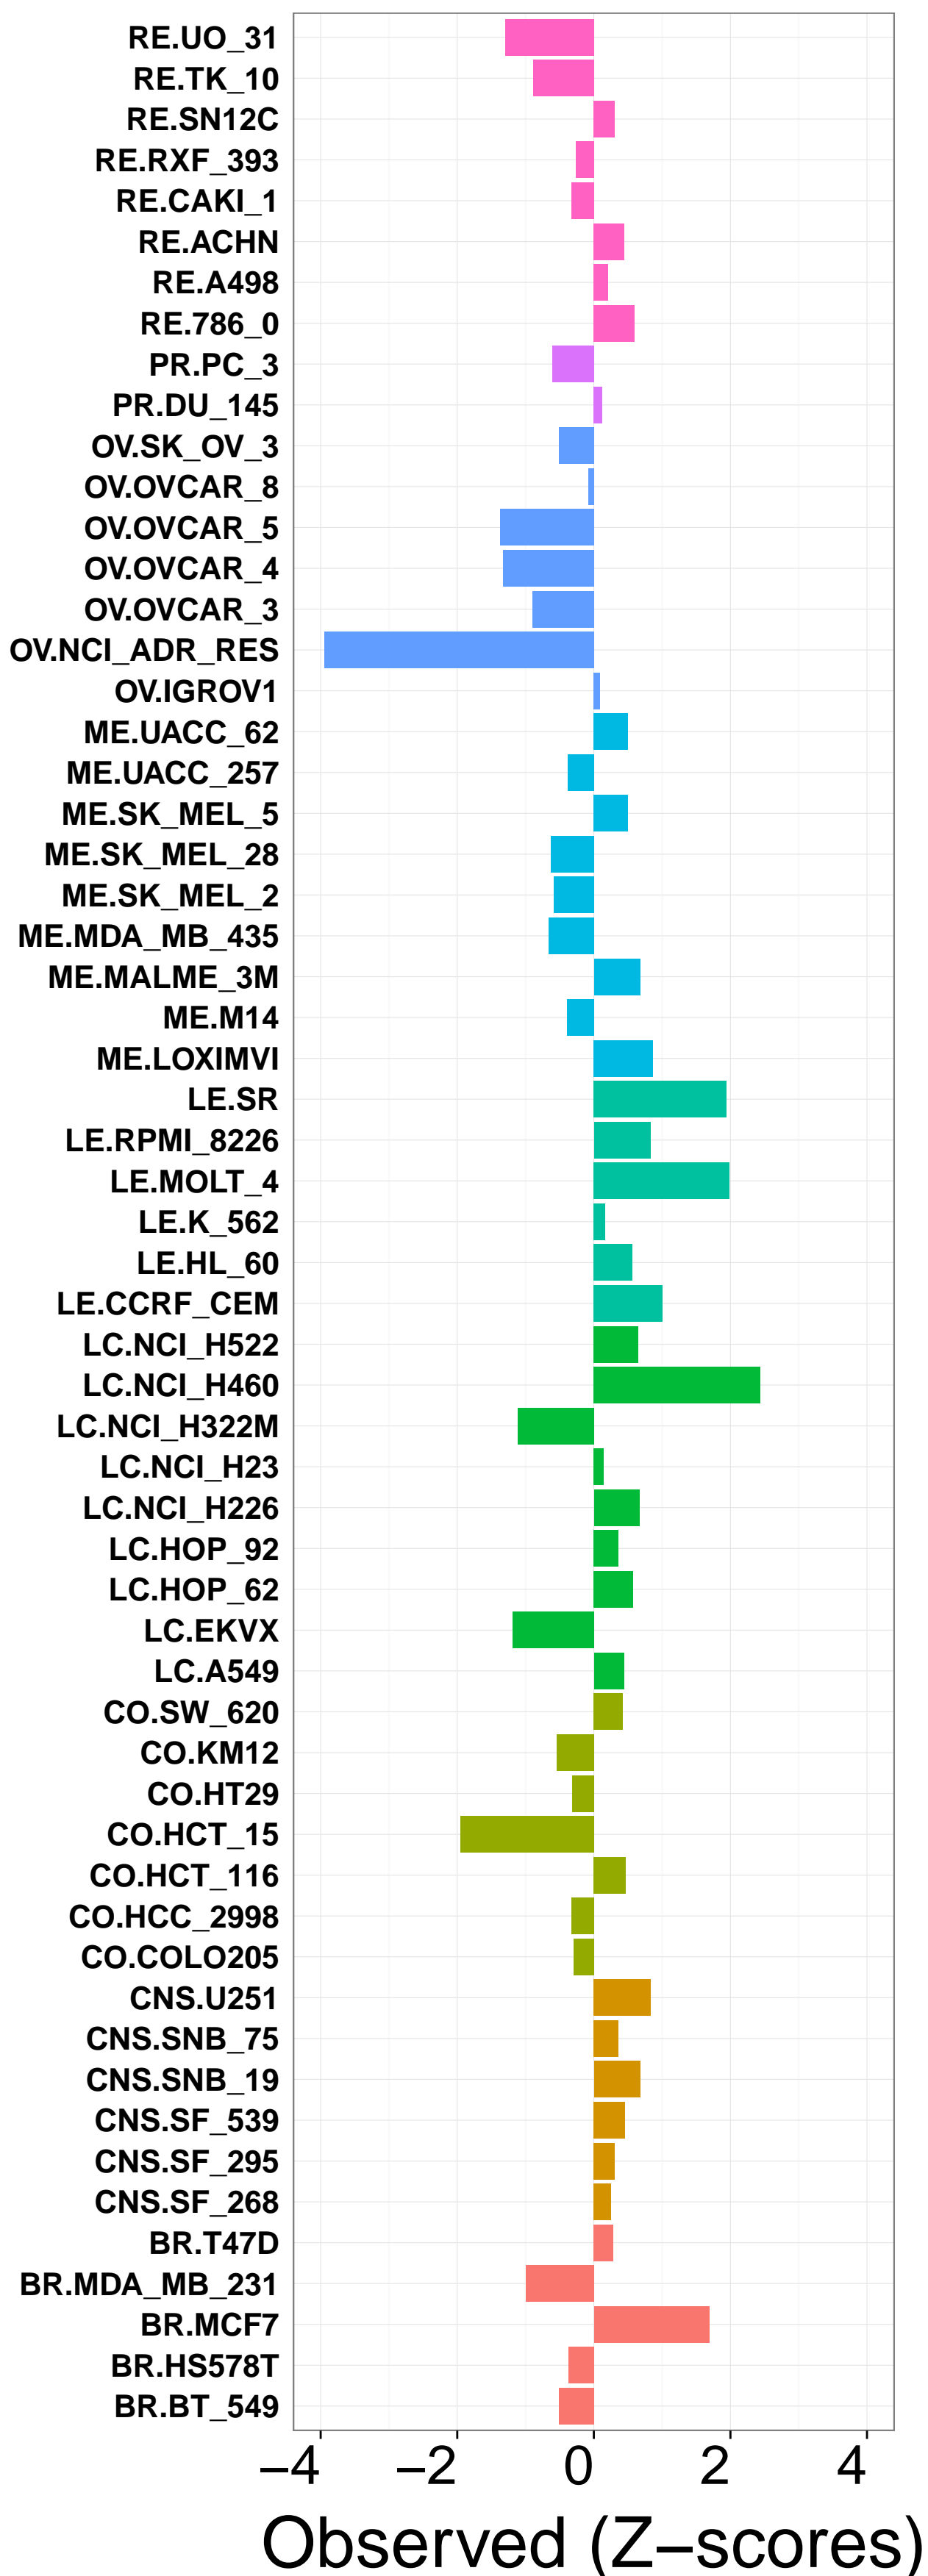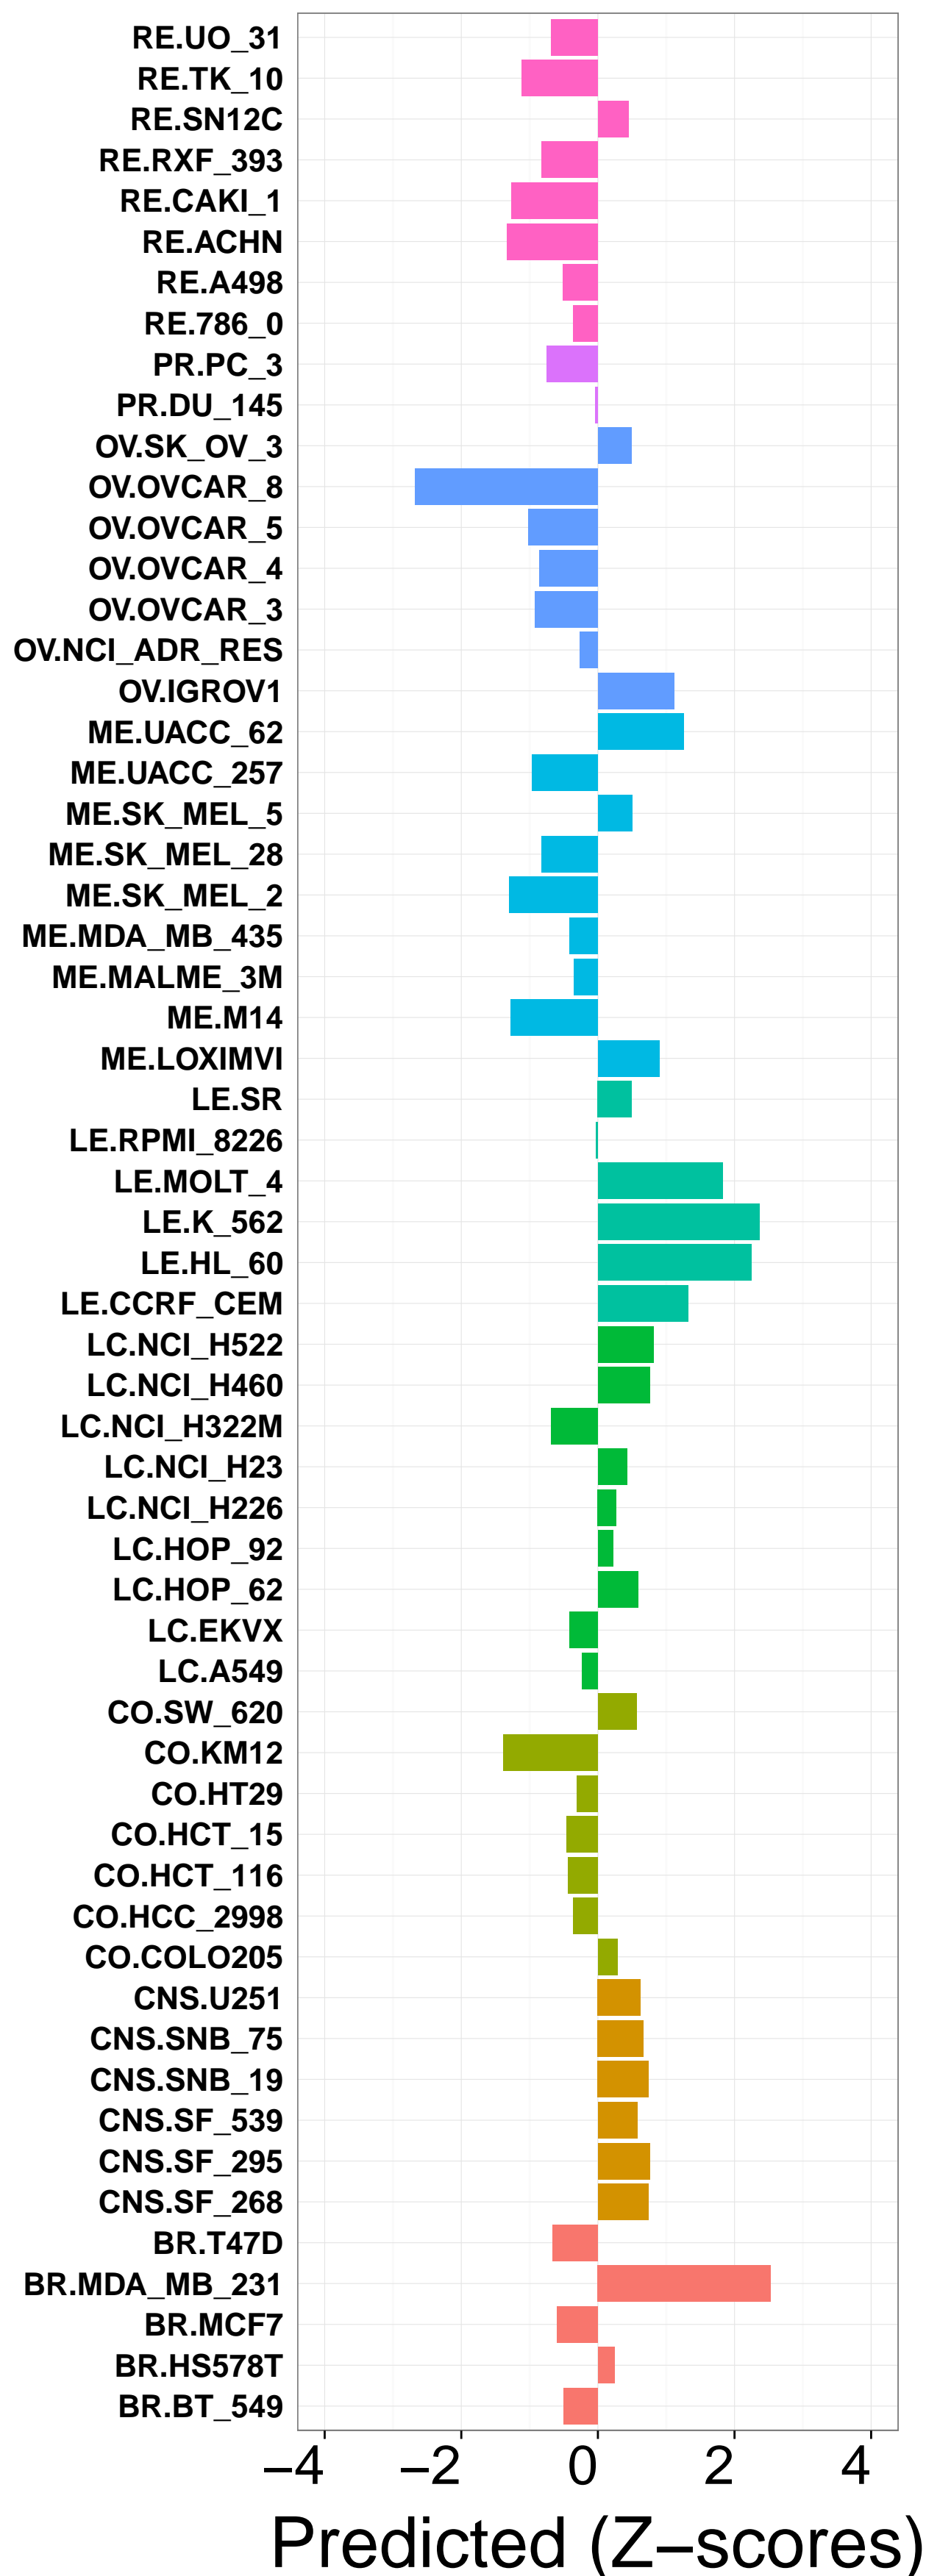

# NSC 125973, (LOCO)

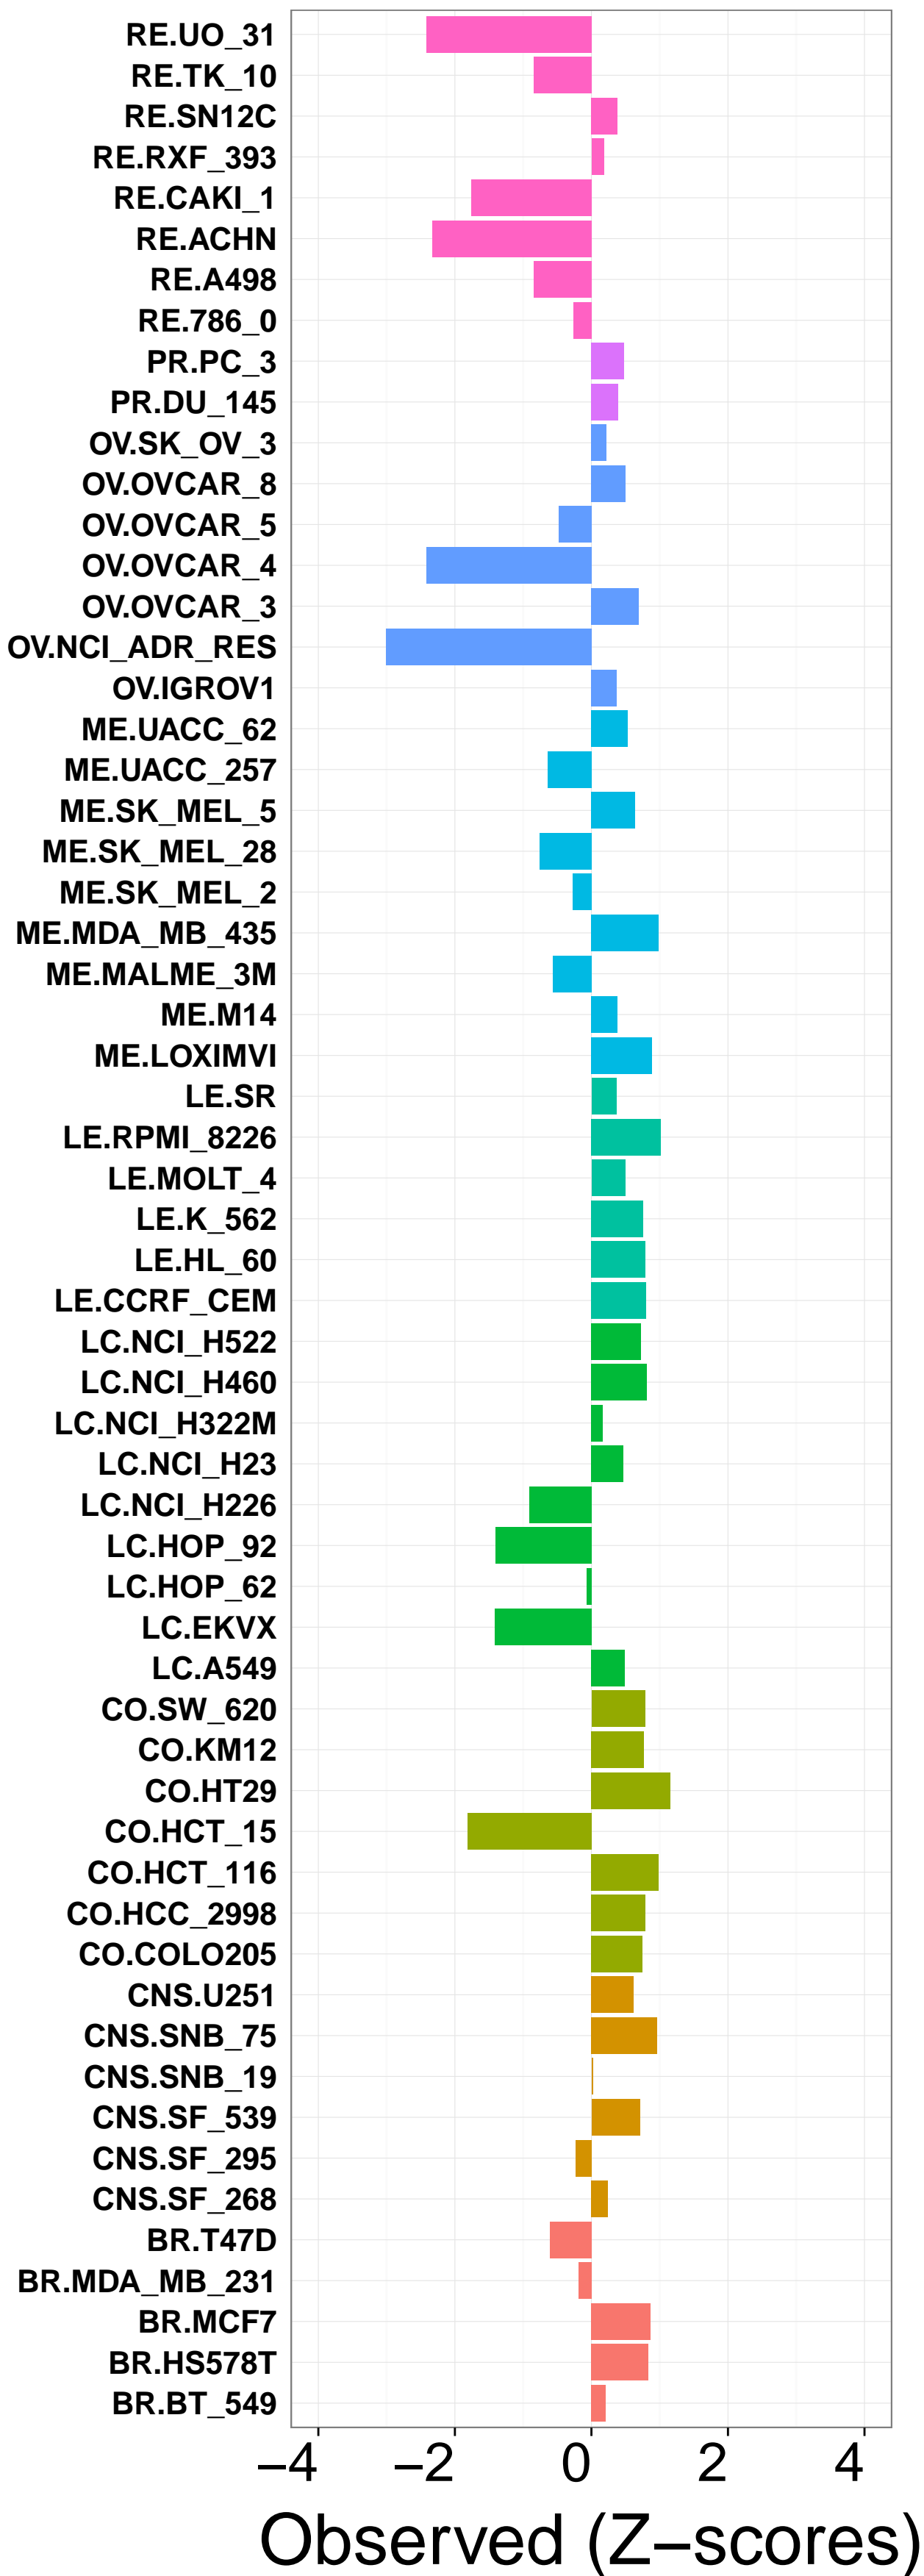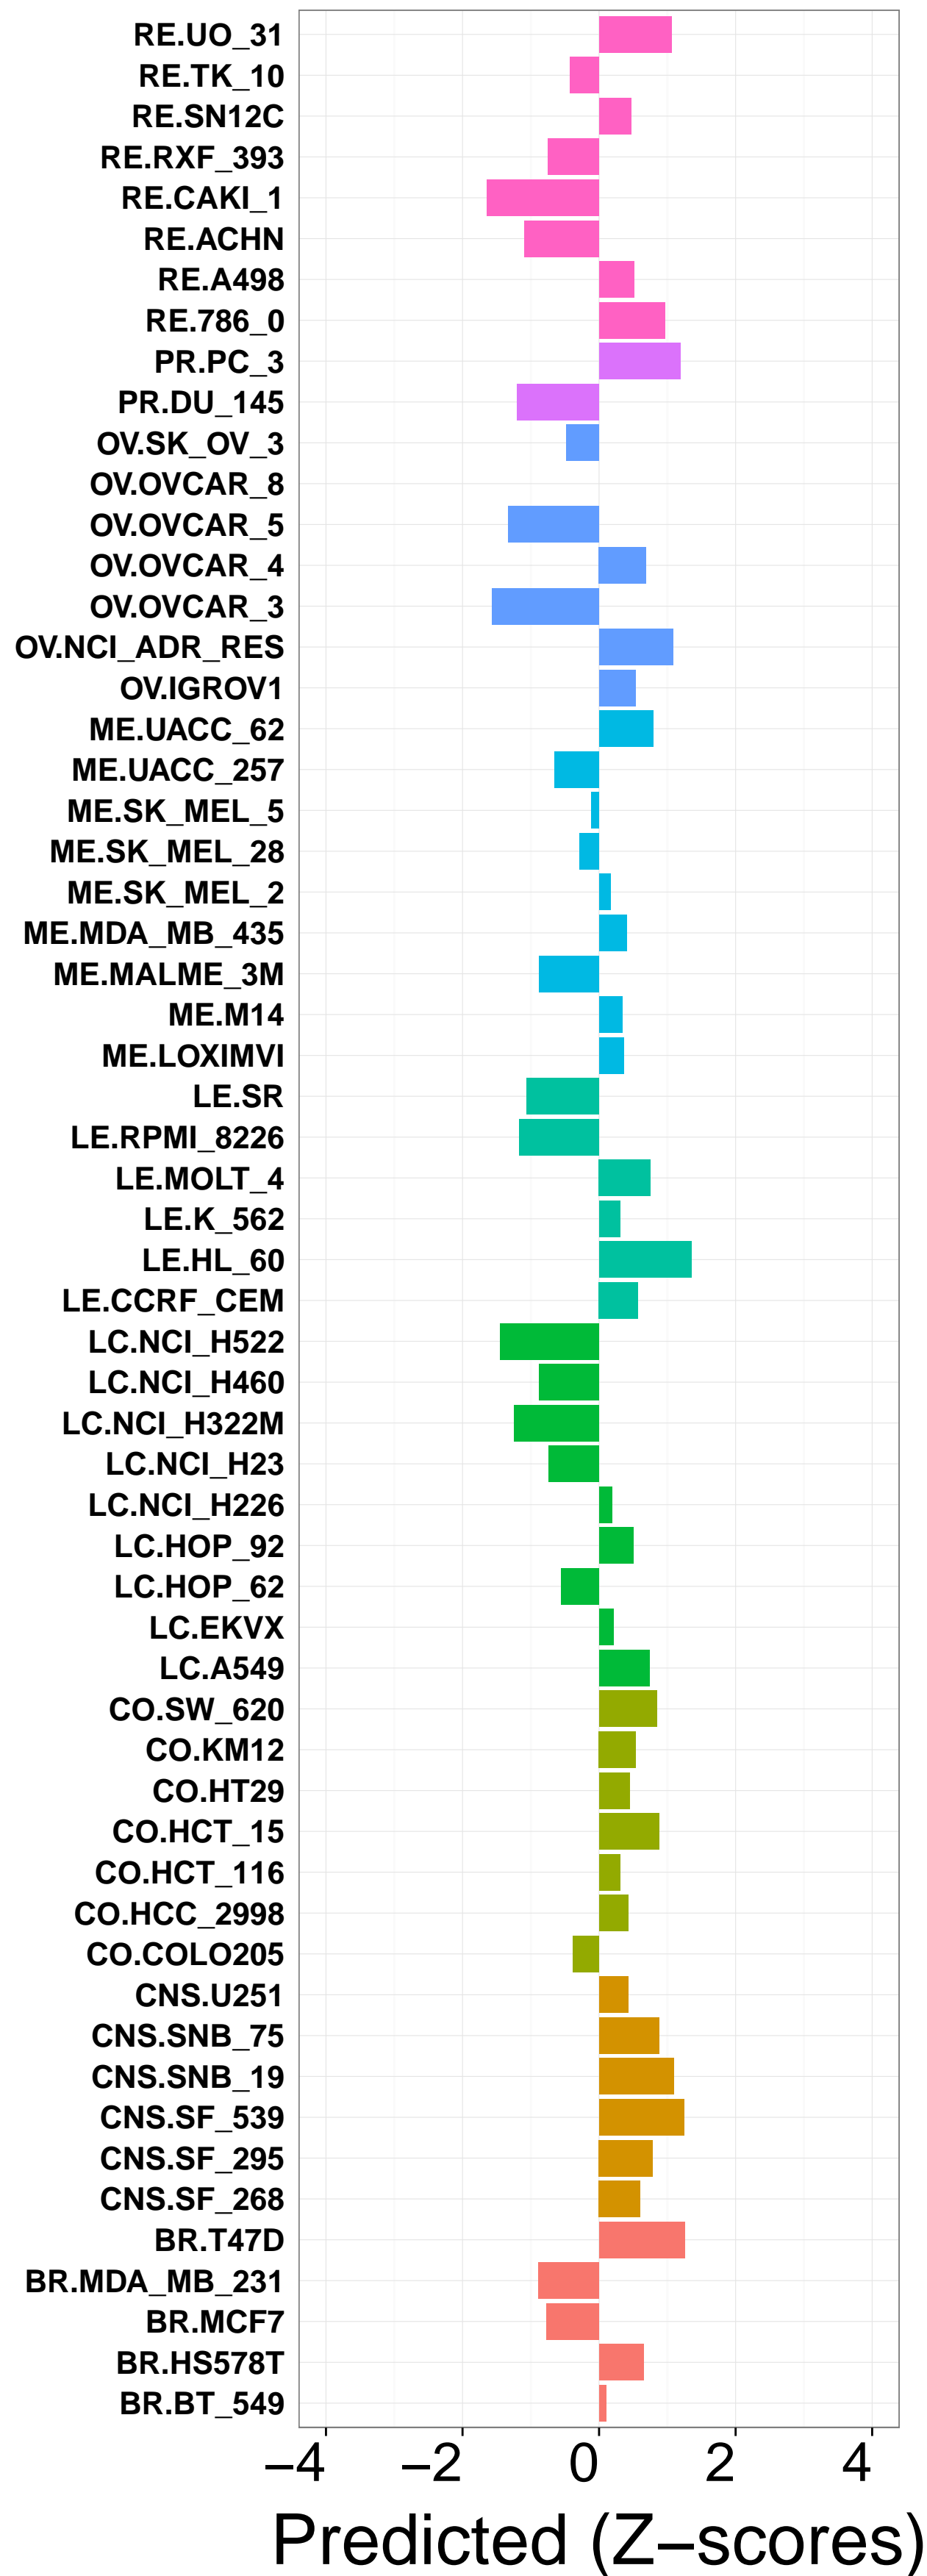

# NSC 127716, Decitabine (LOCO)

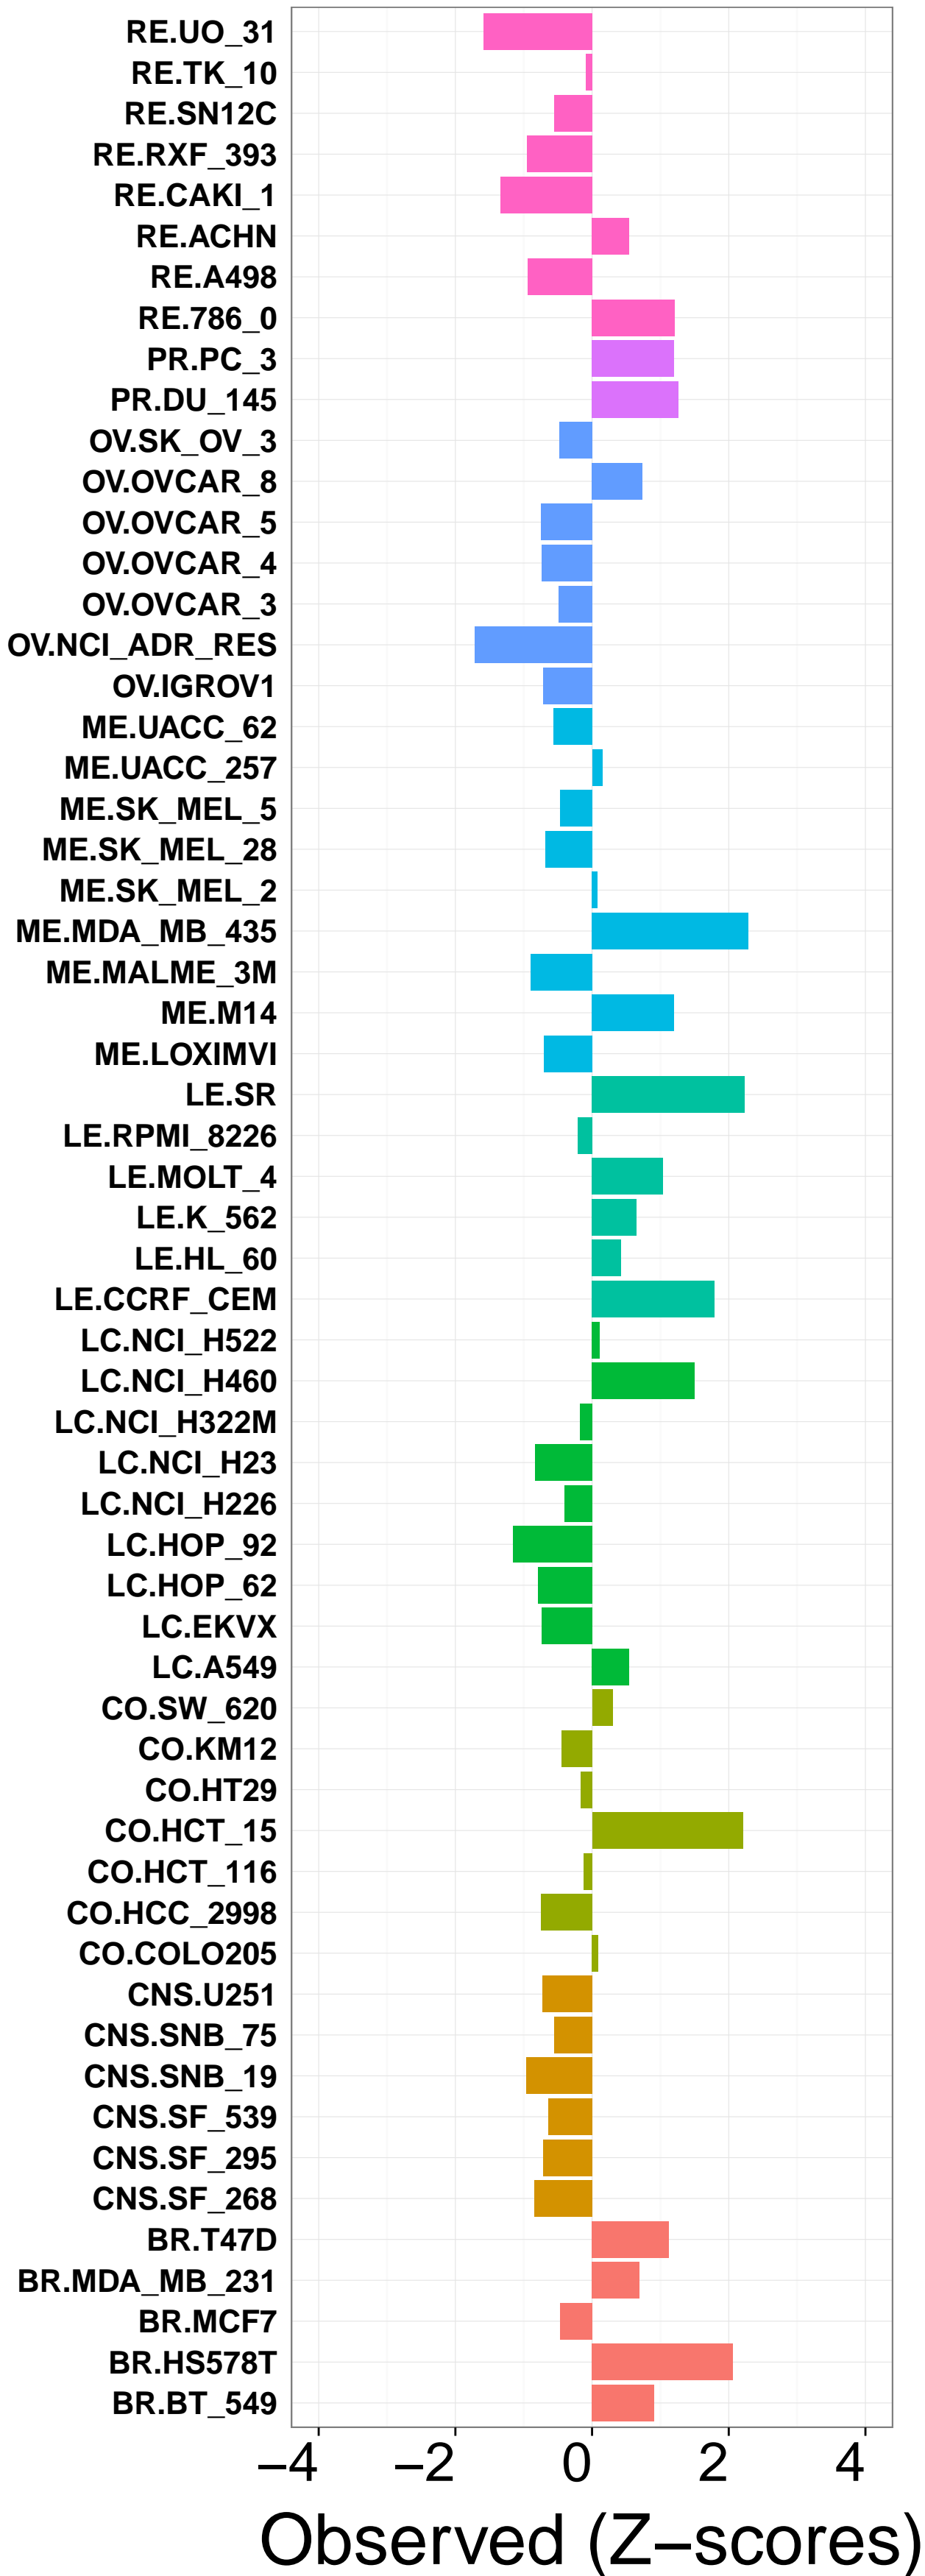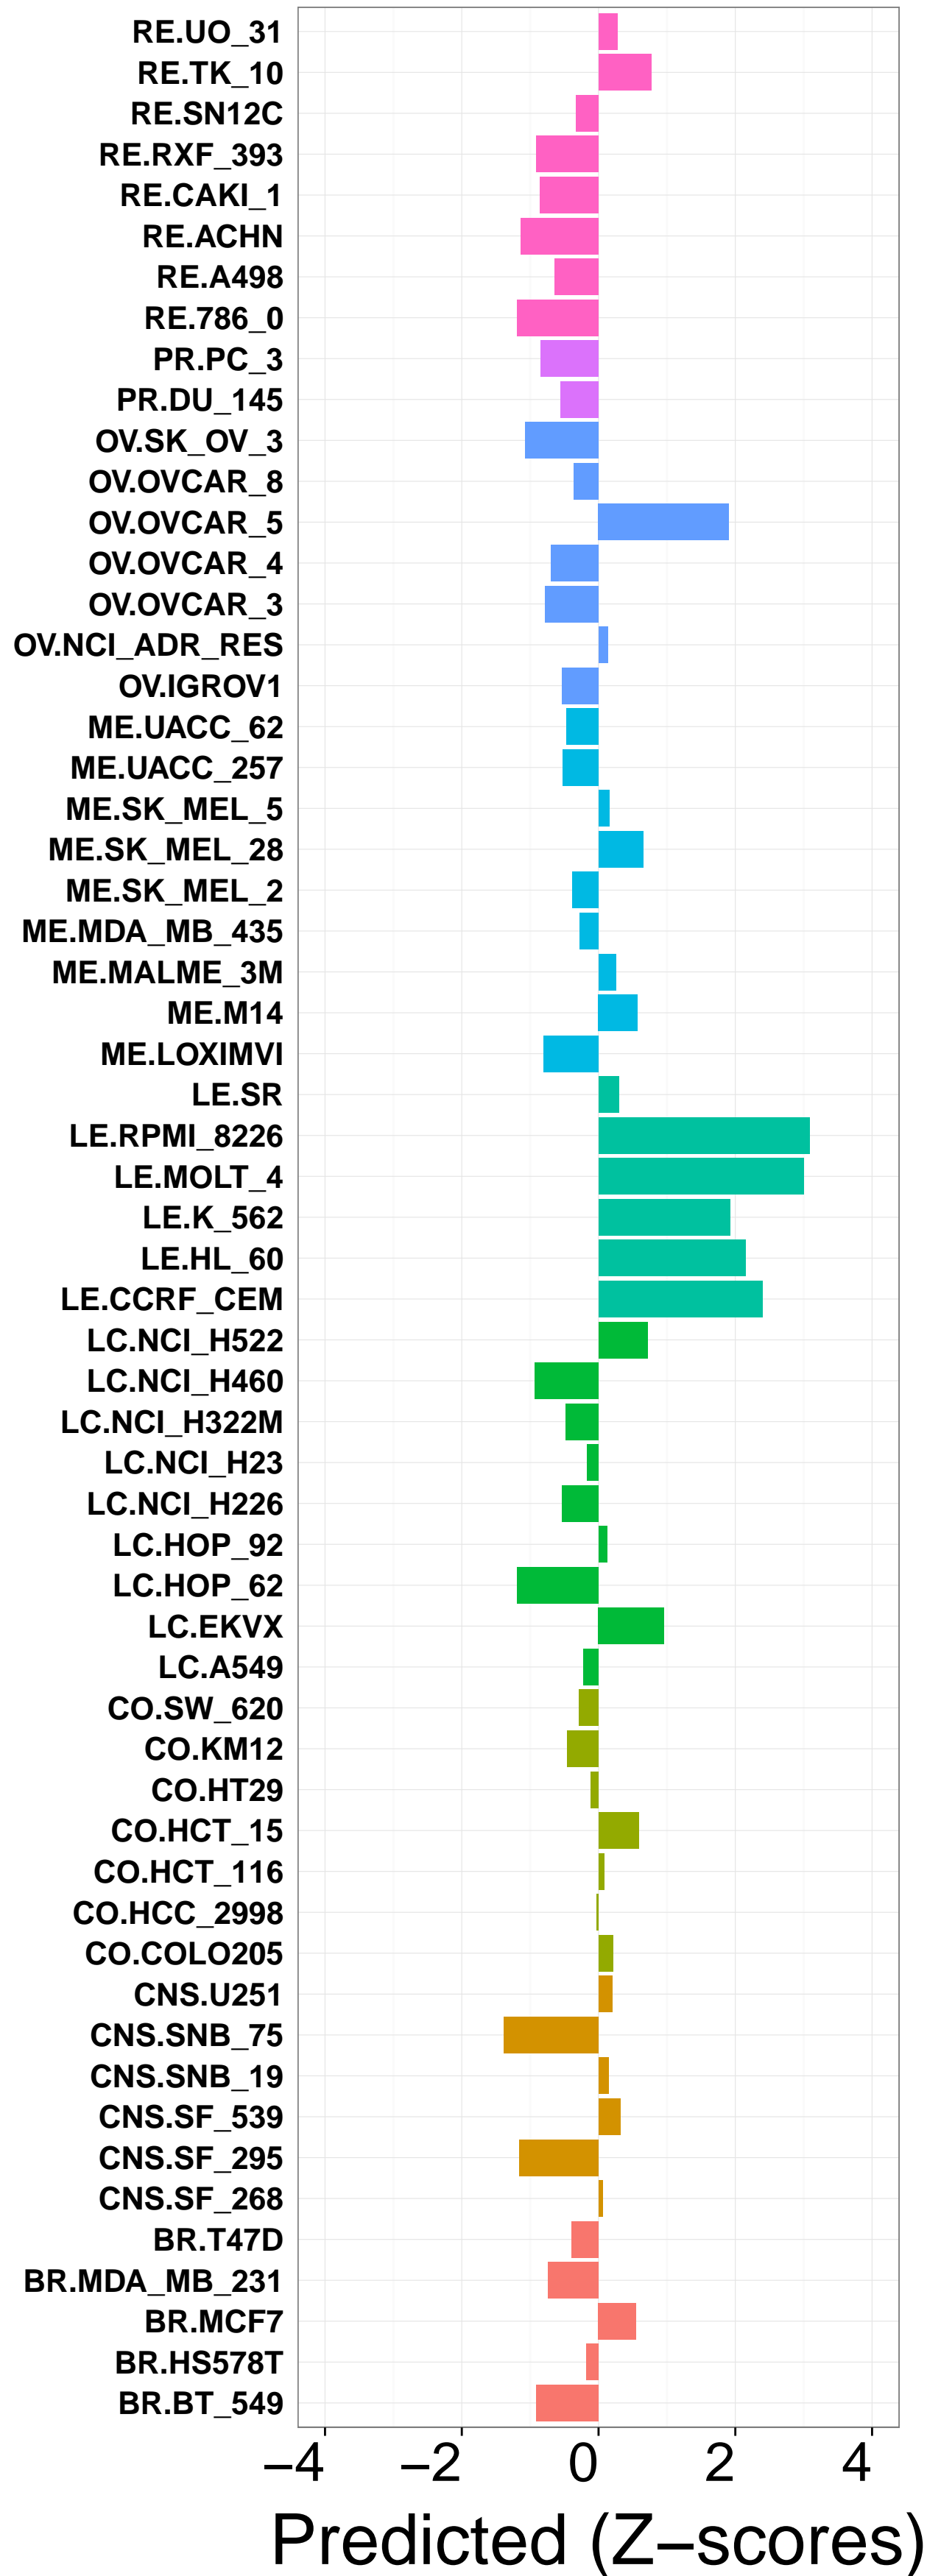



# NSC 141540, (LOCO)

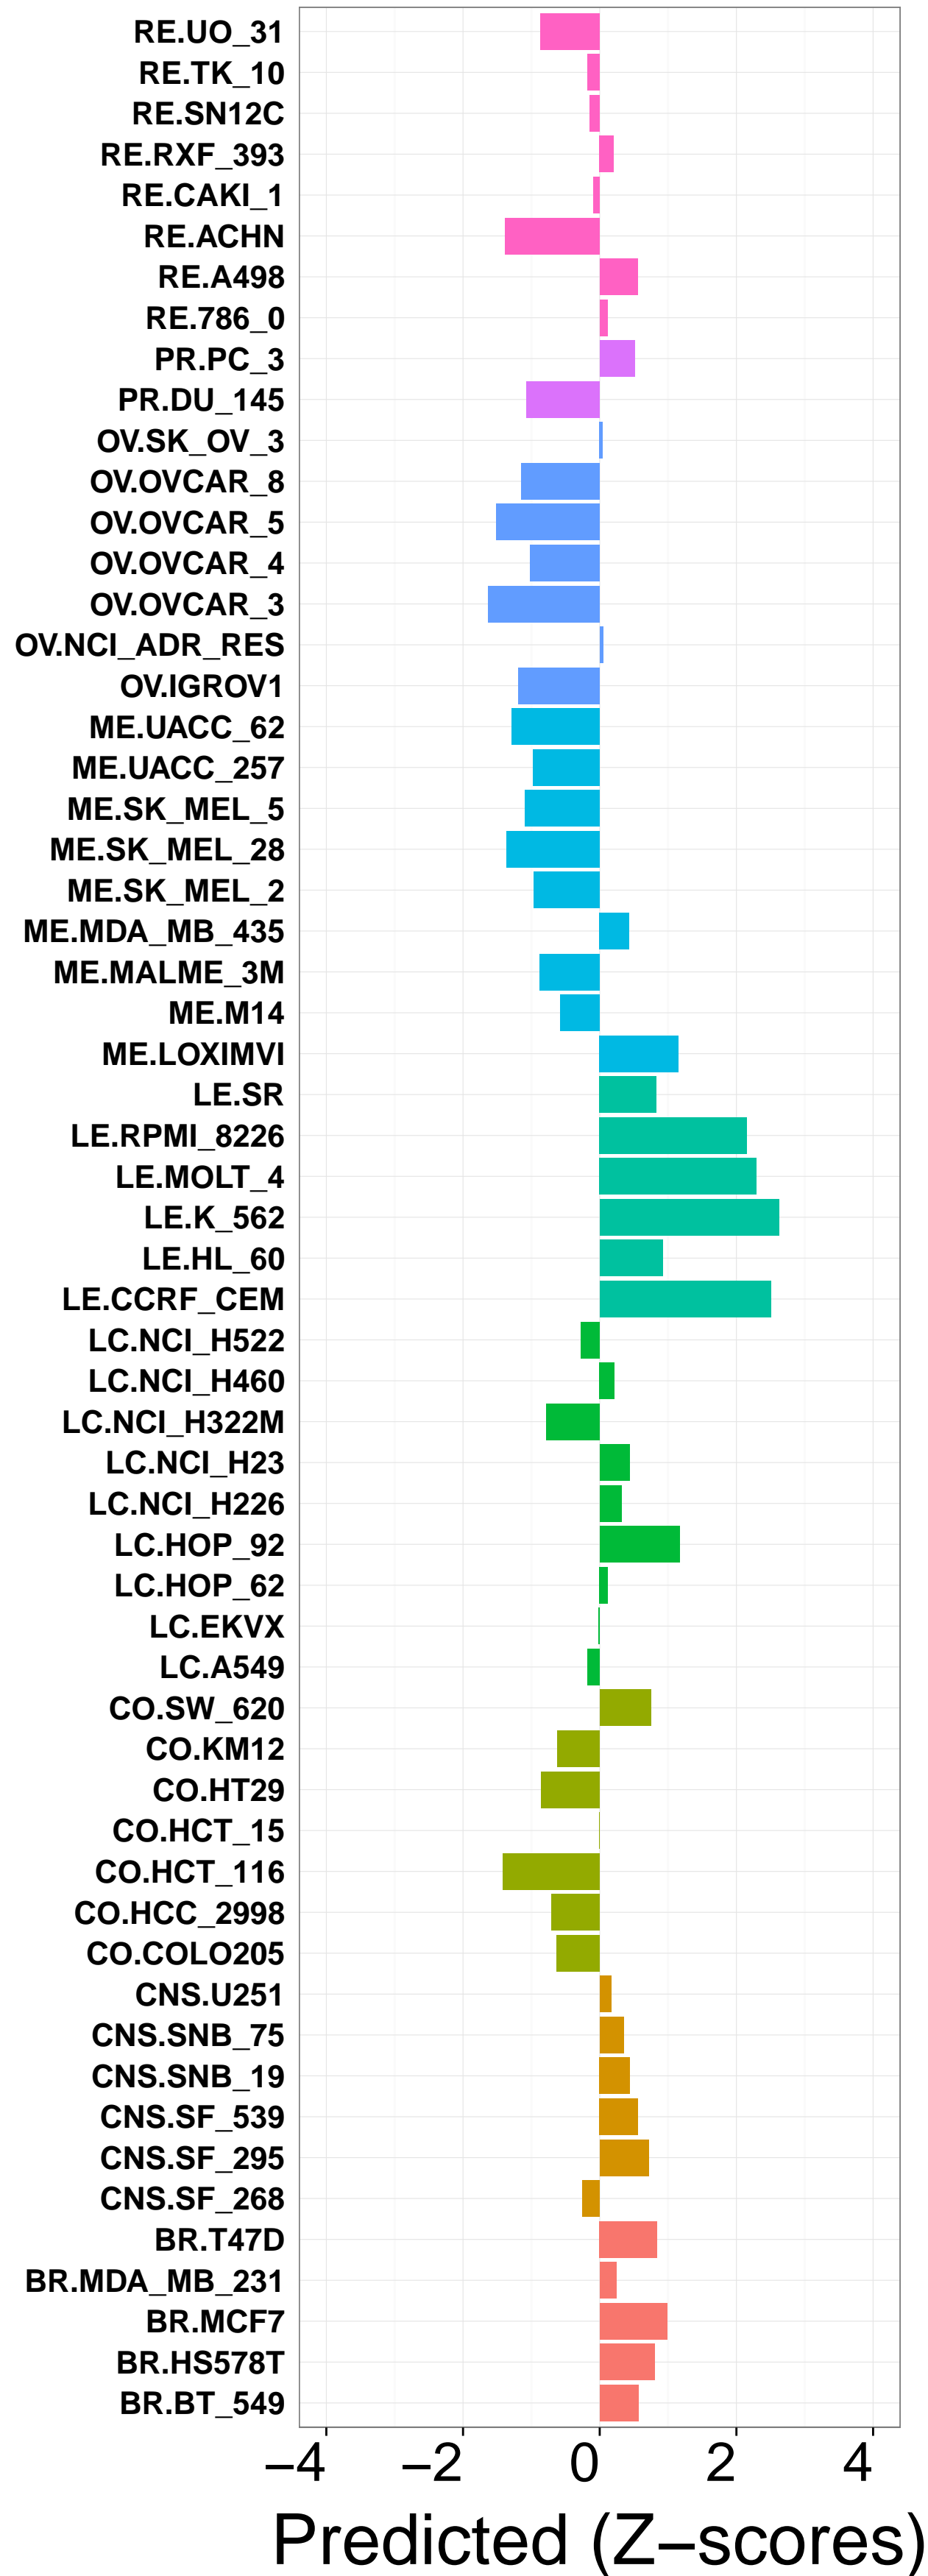

# NSC 141633, (LOCO)

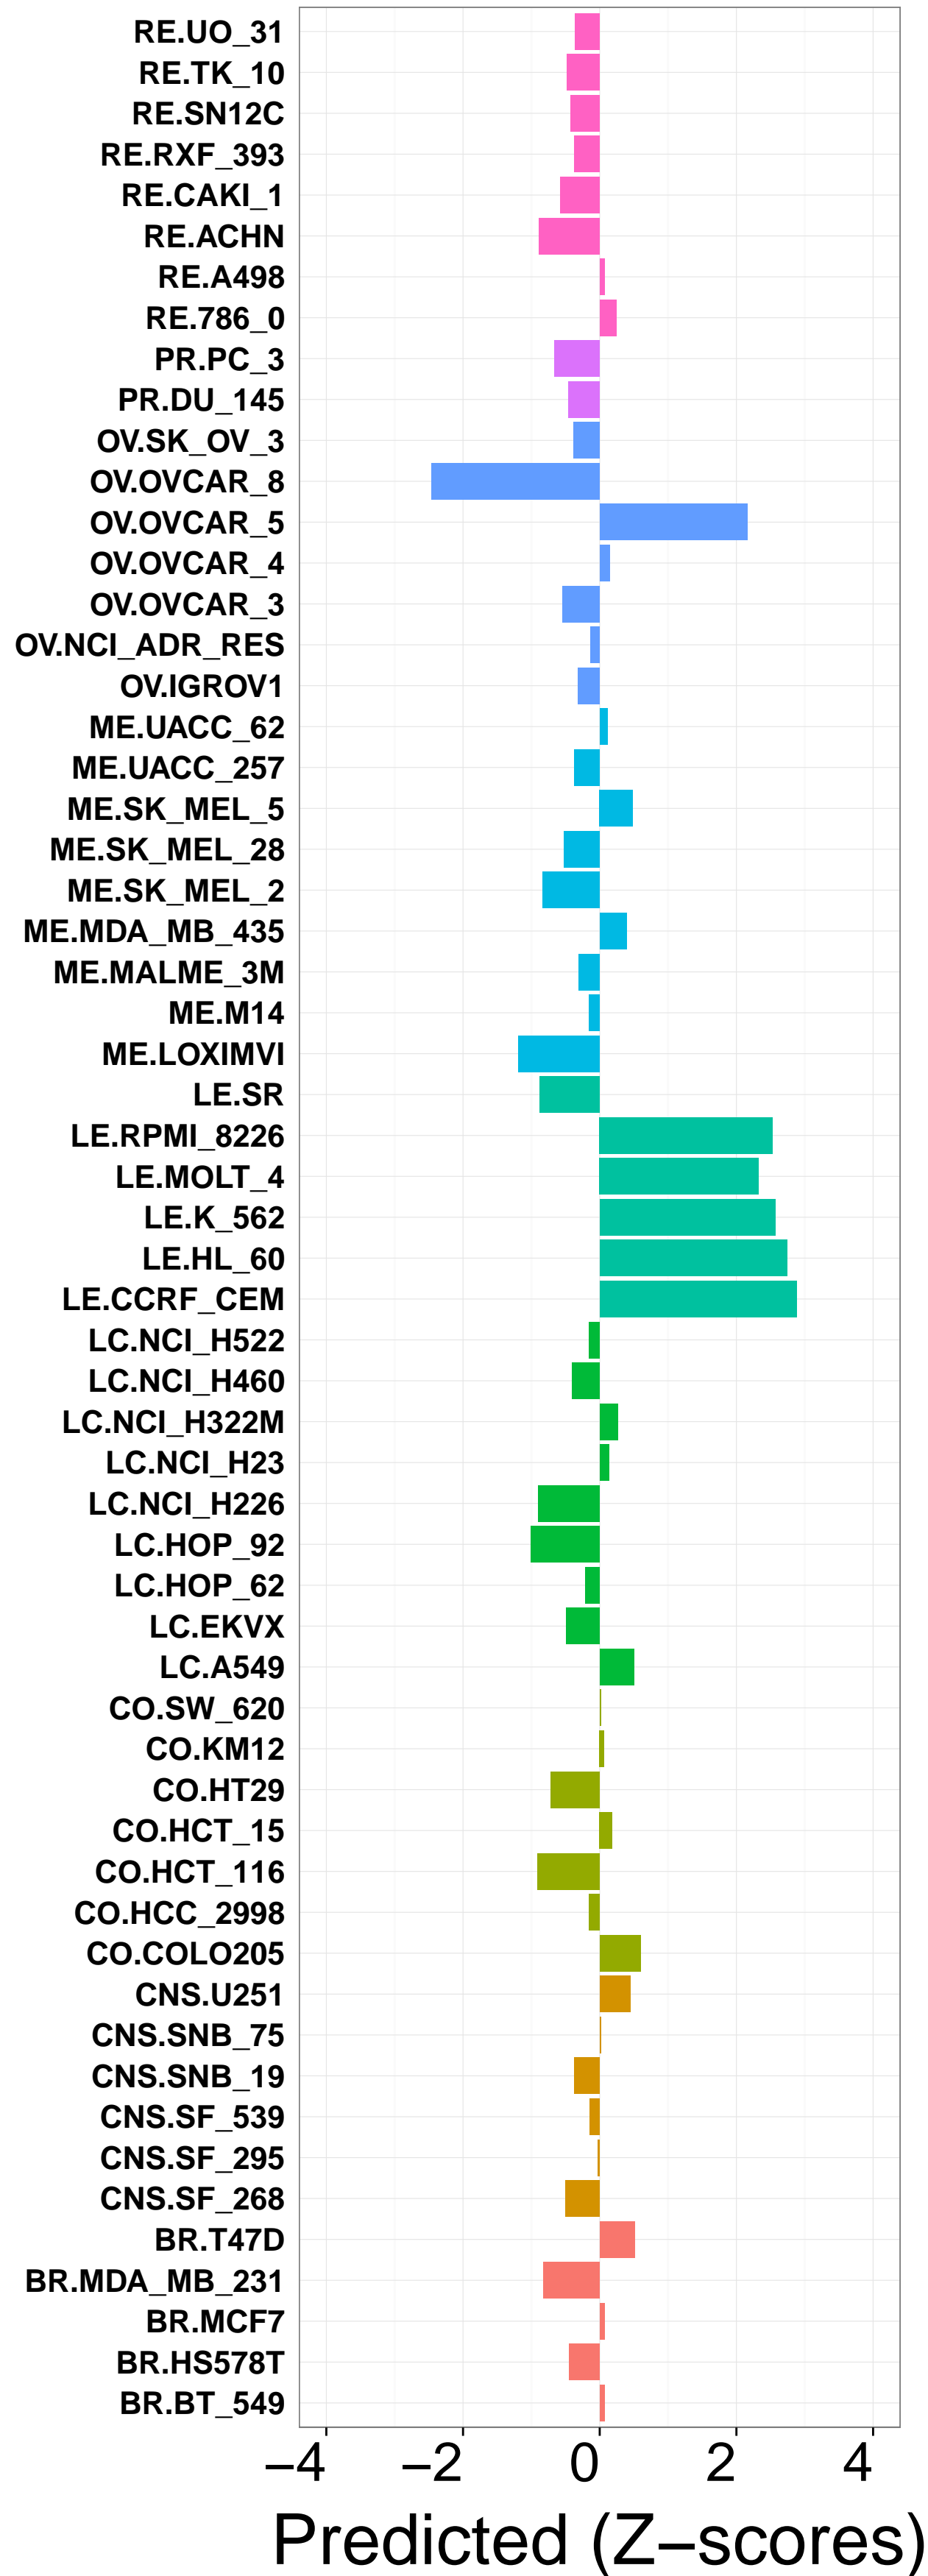

# NSC 174939, (LOCO)

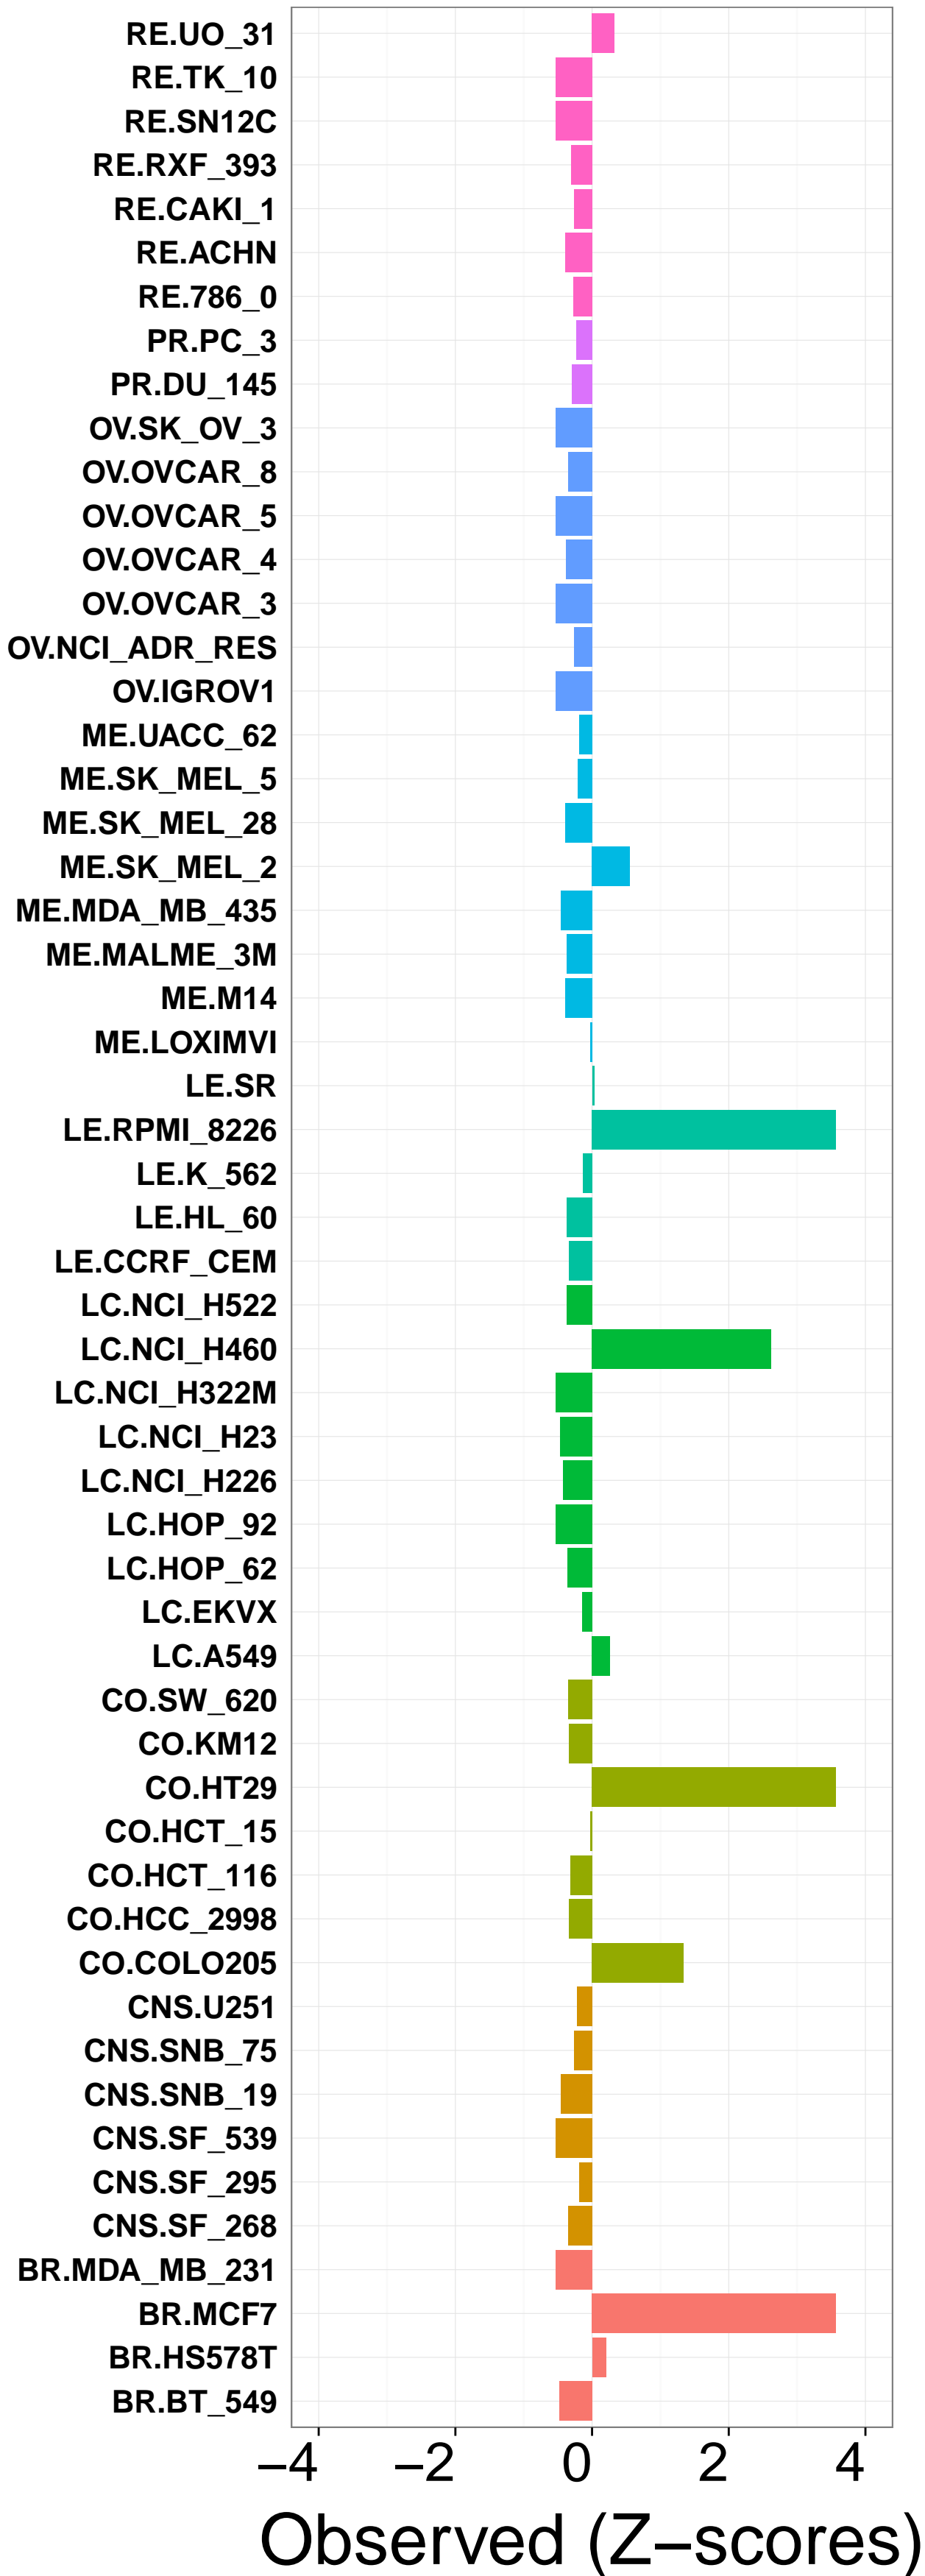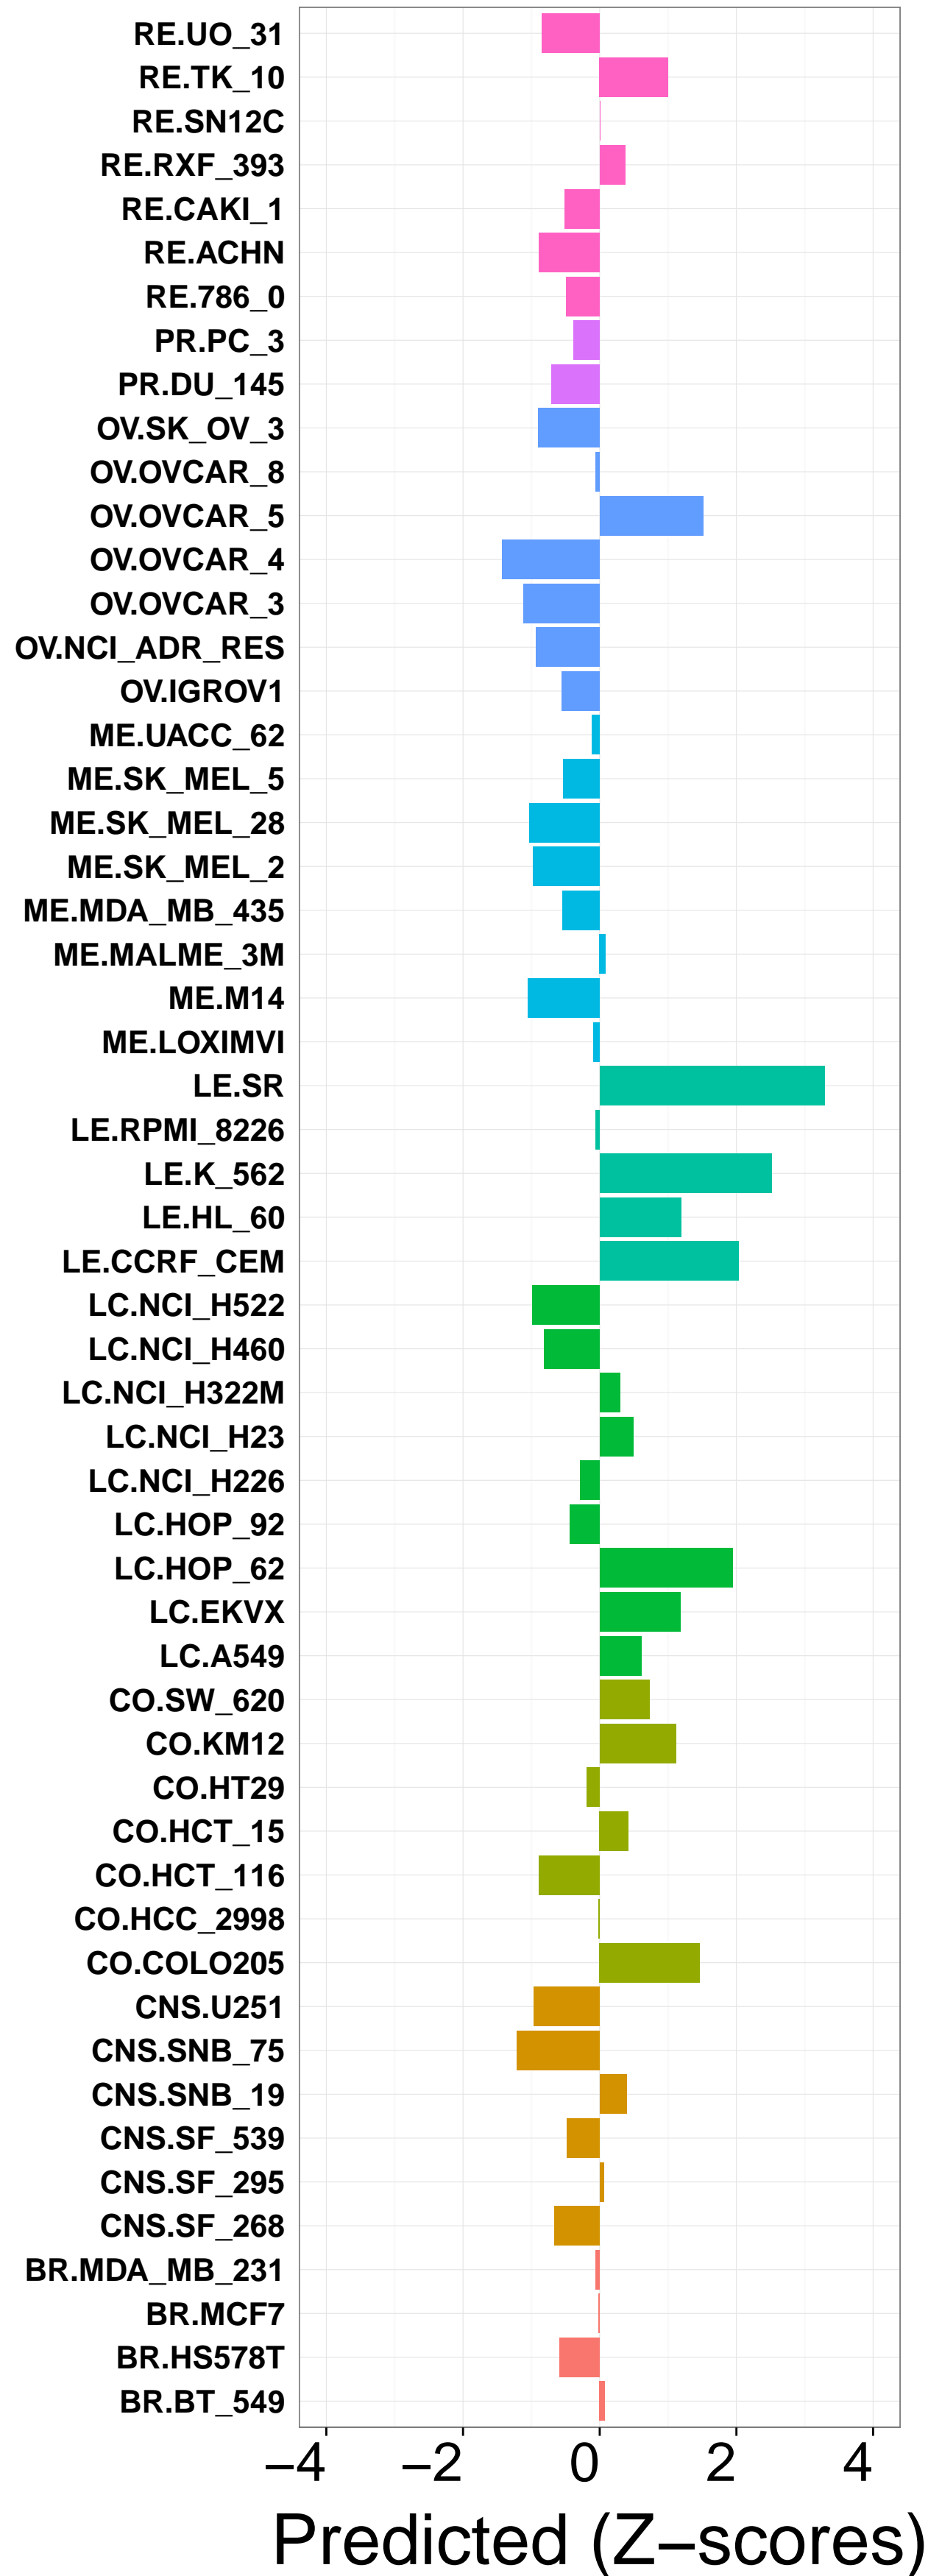

# NSC 19893, Fluorouracil (LOCO)

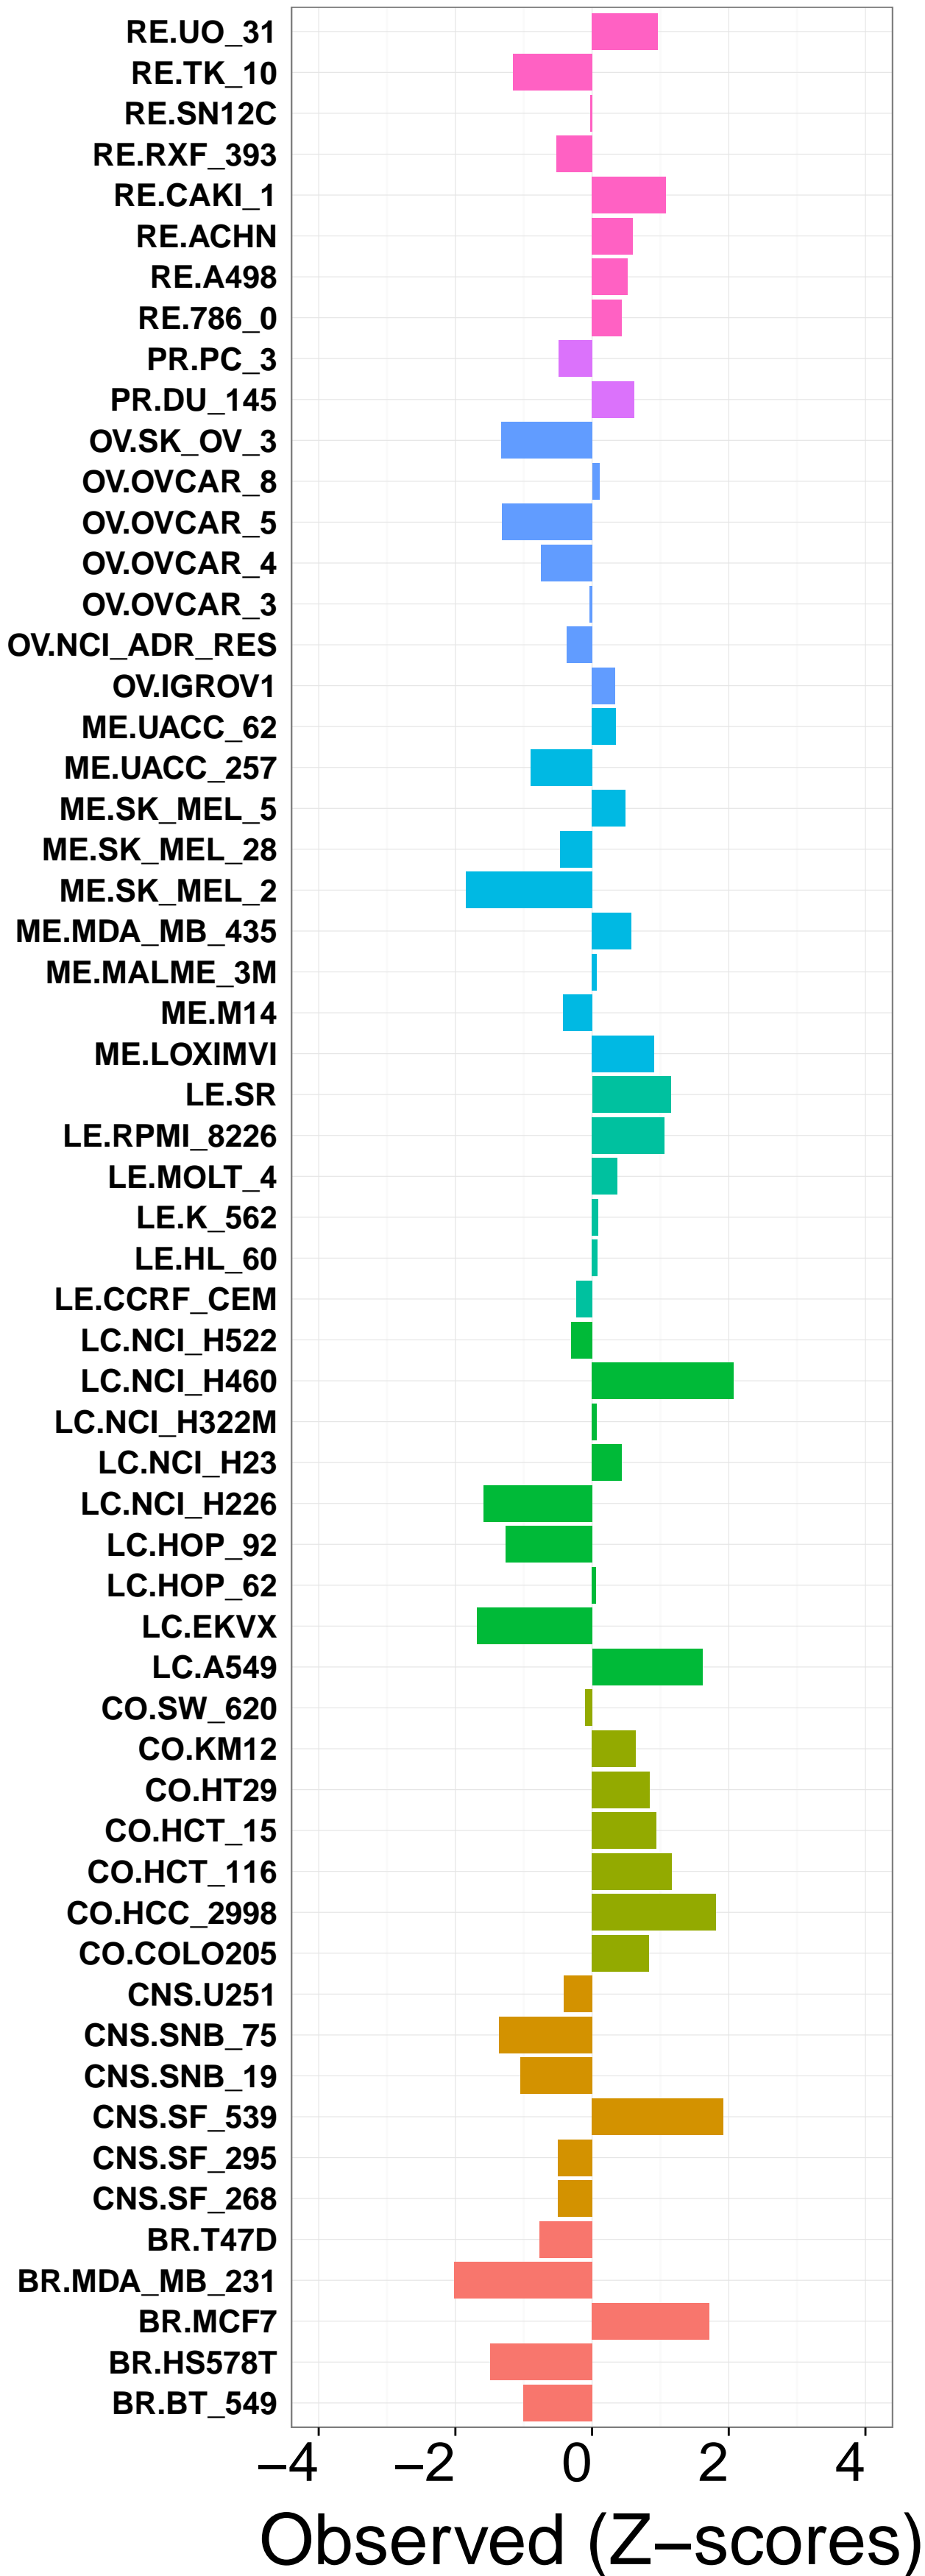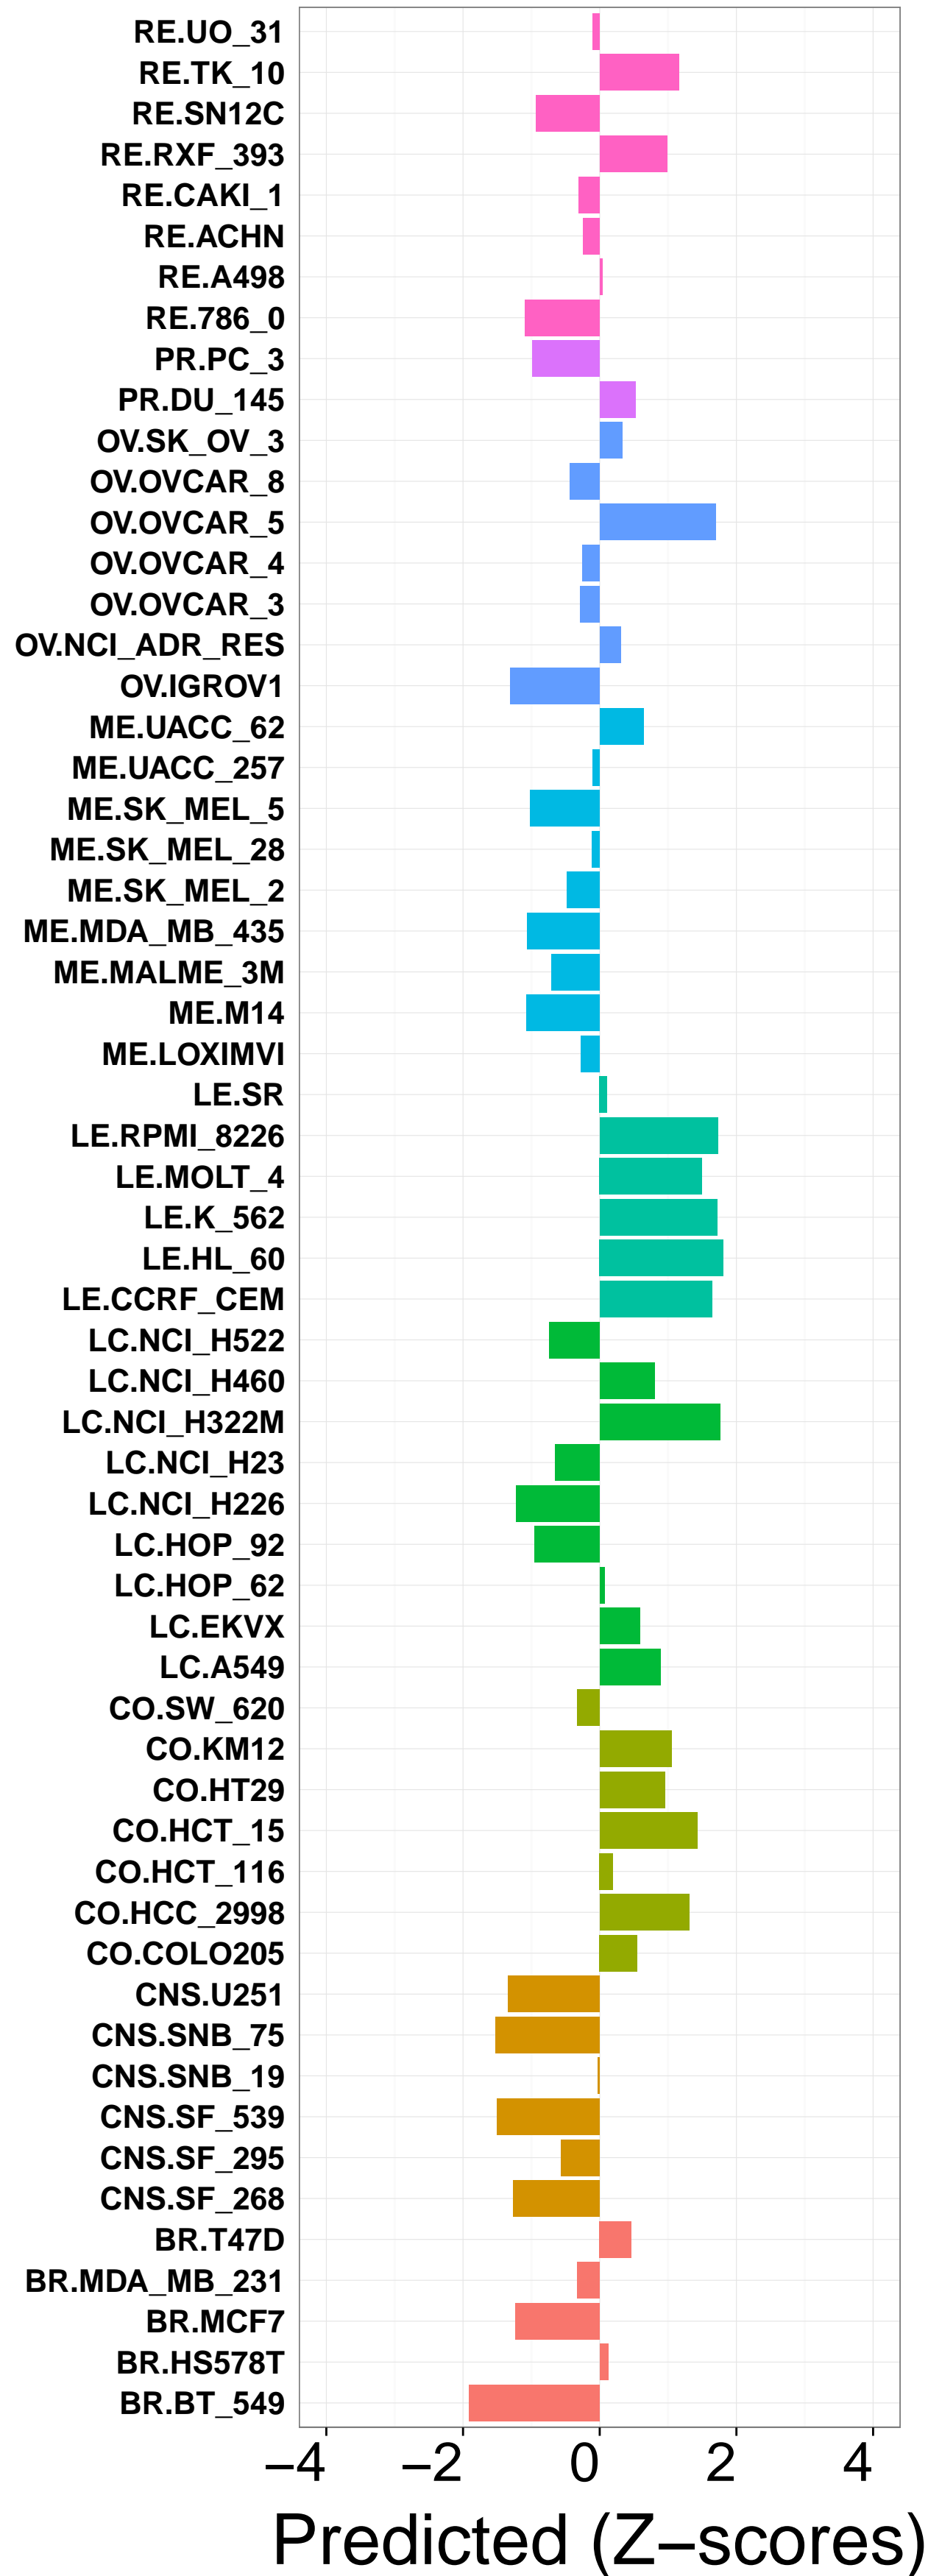

# NSC 221019, (LOCO)

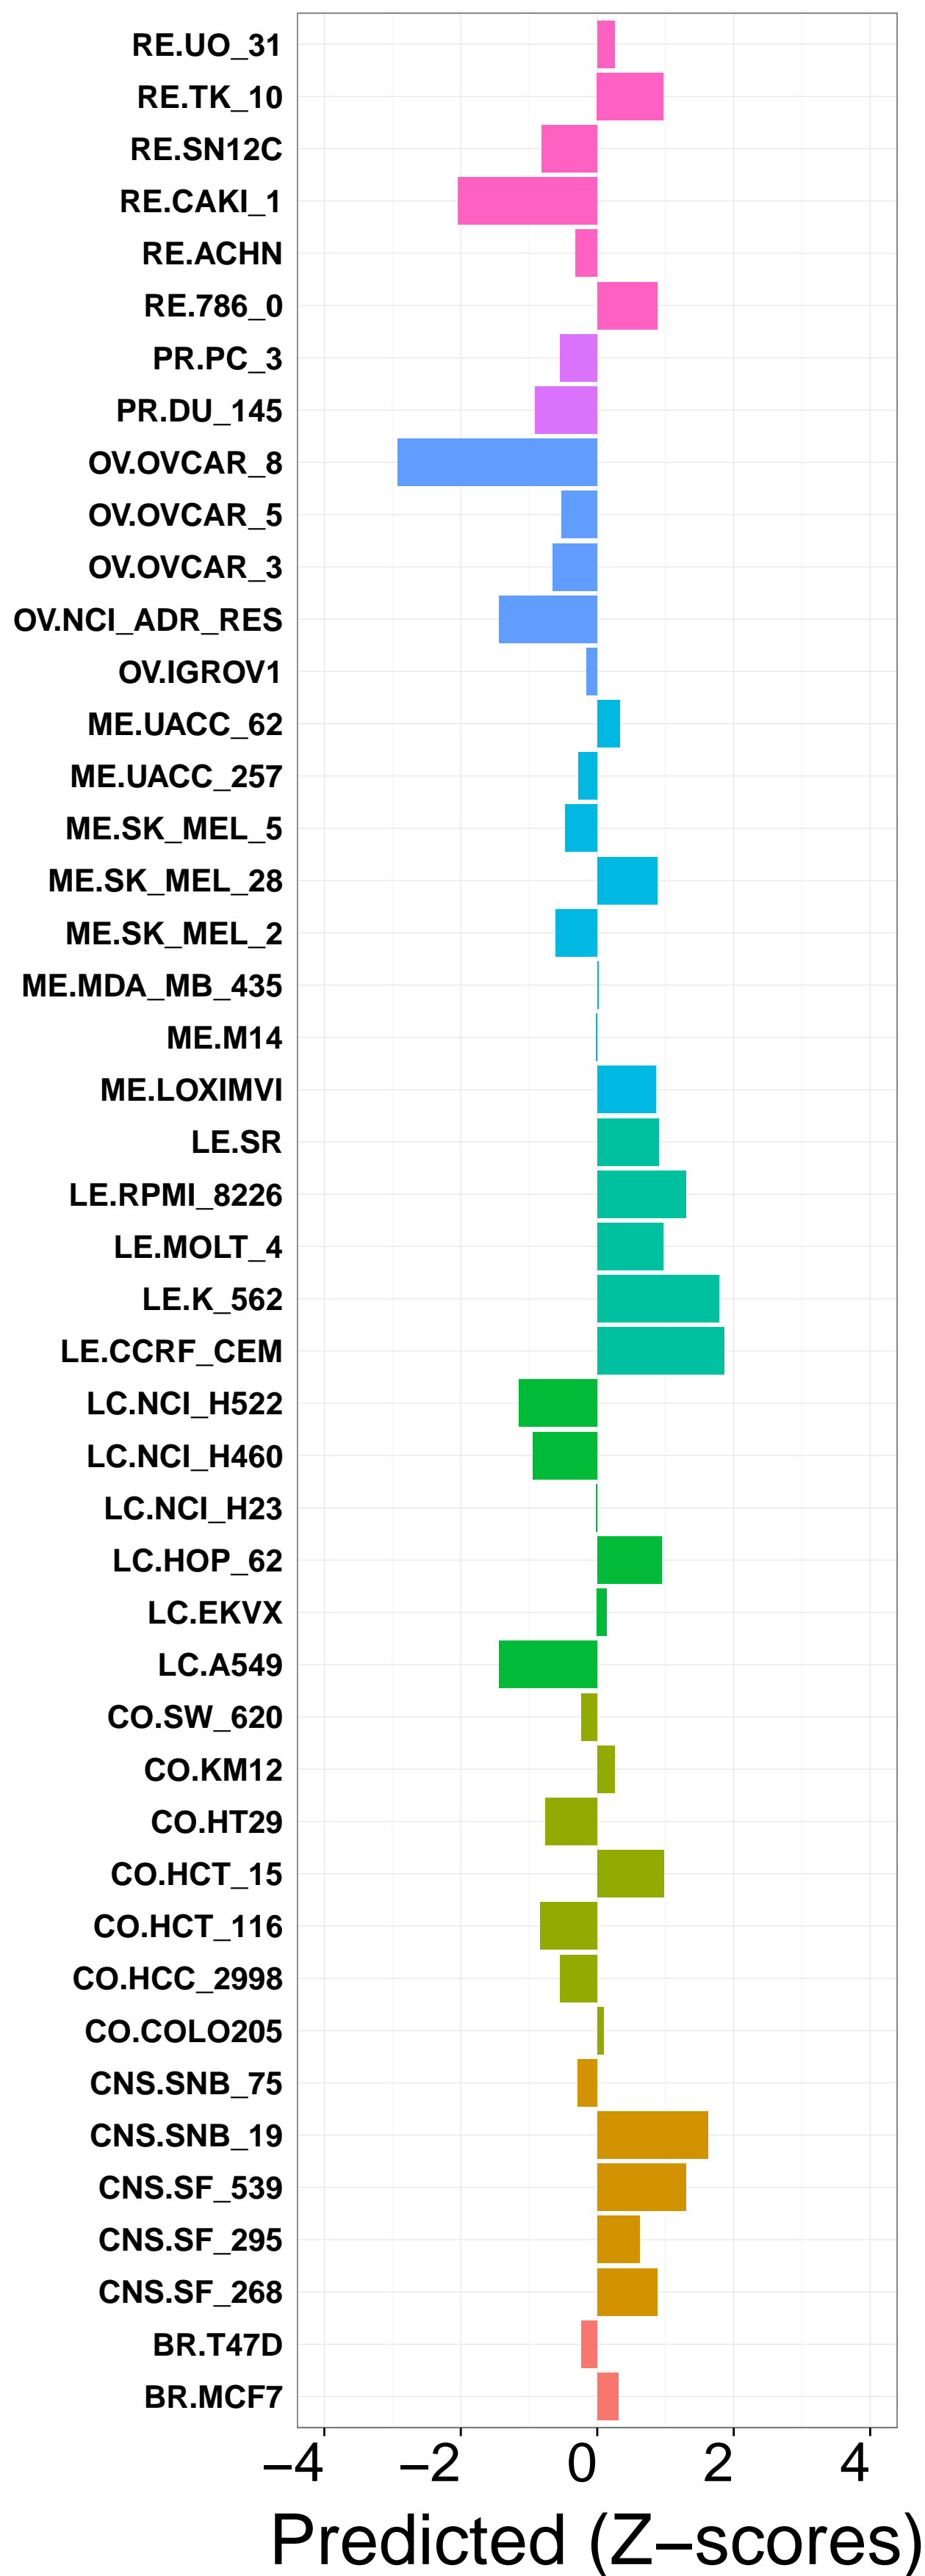



# NSC 246131, (LOCO)

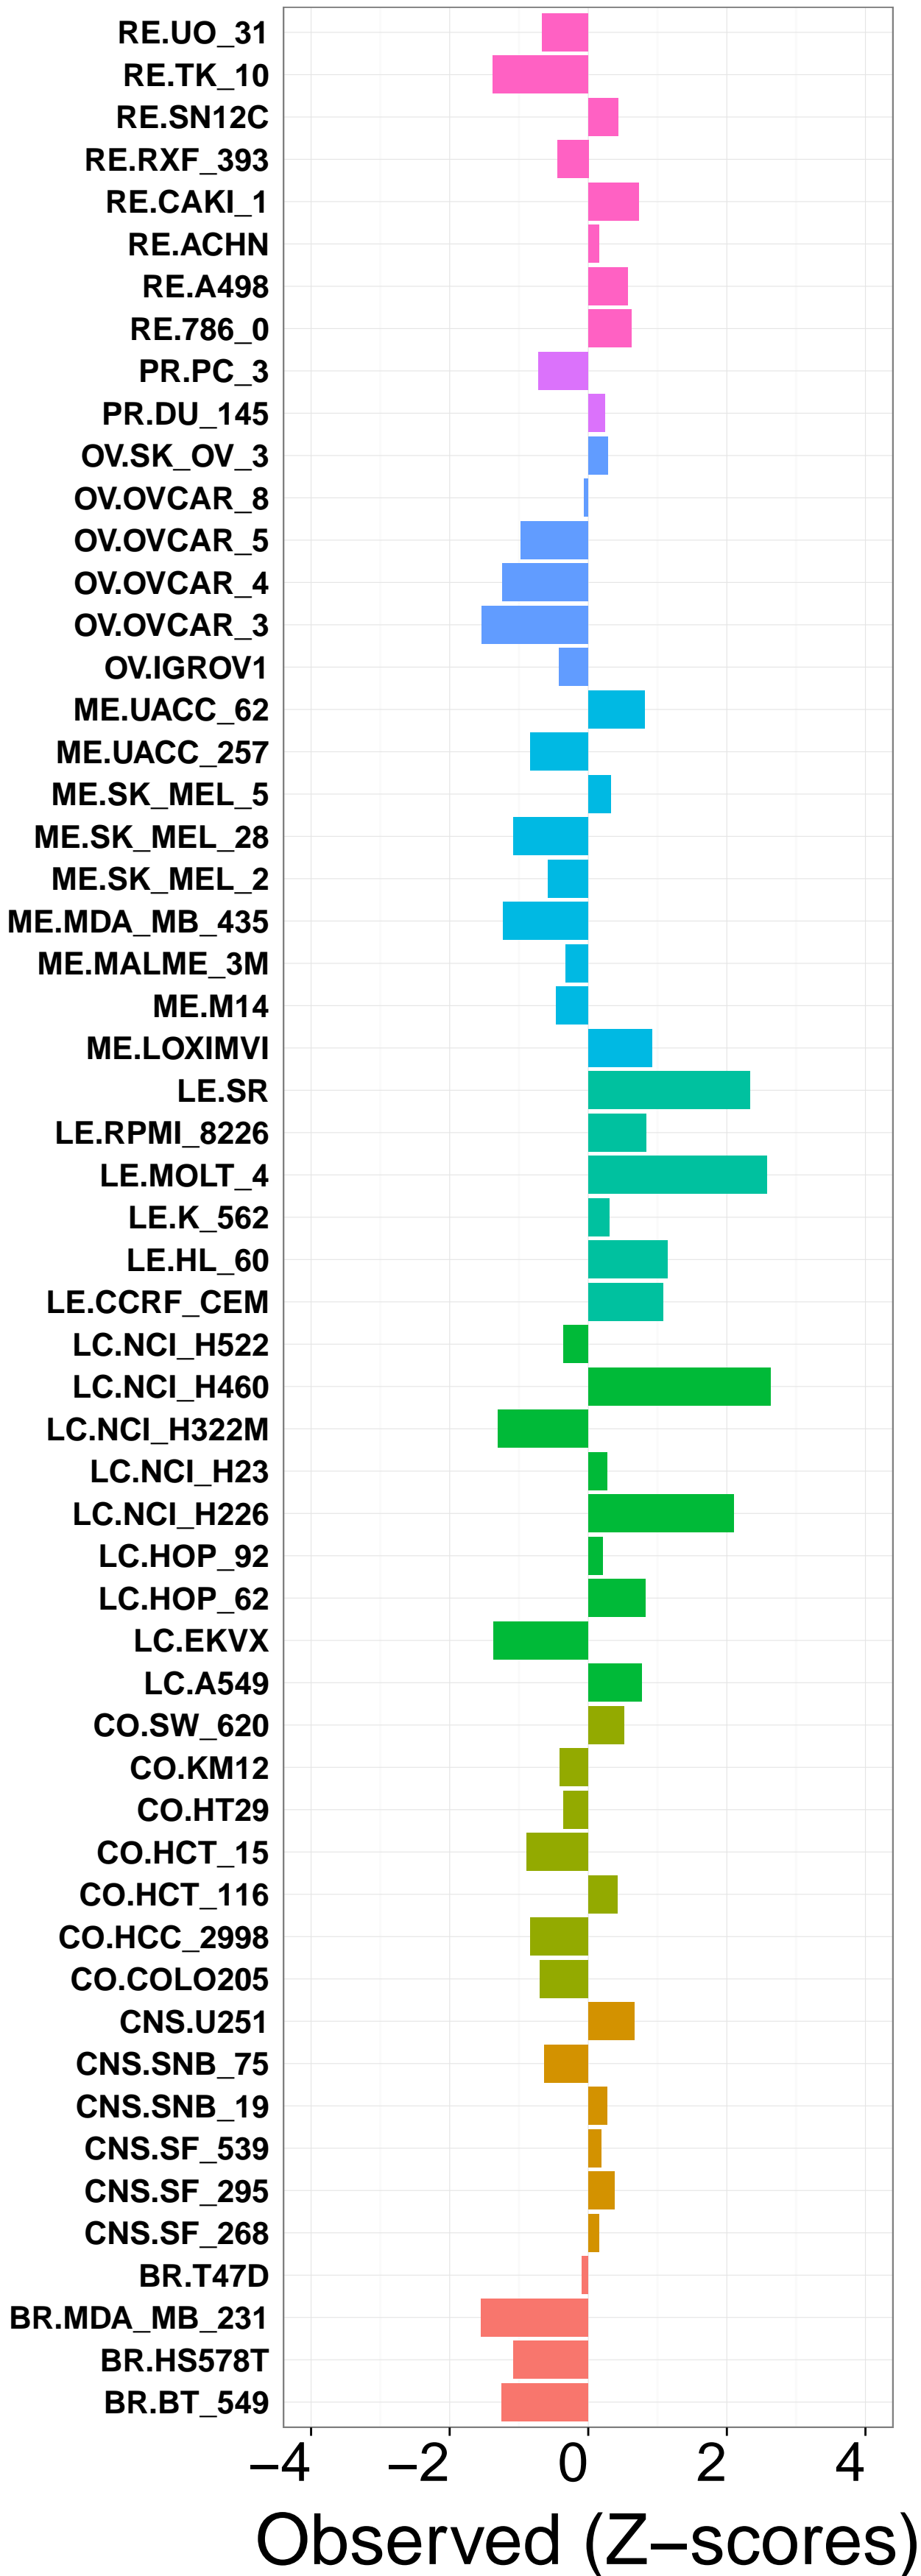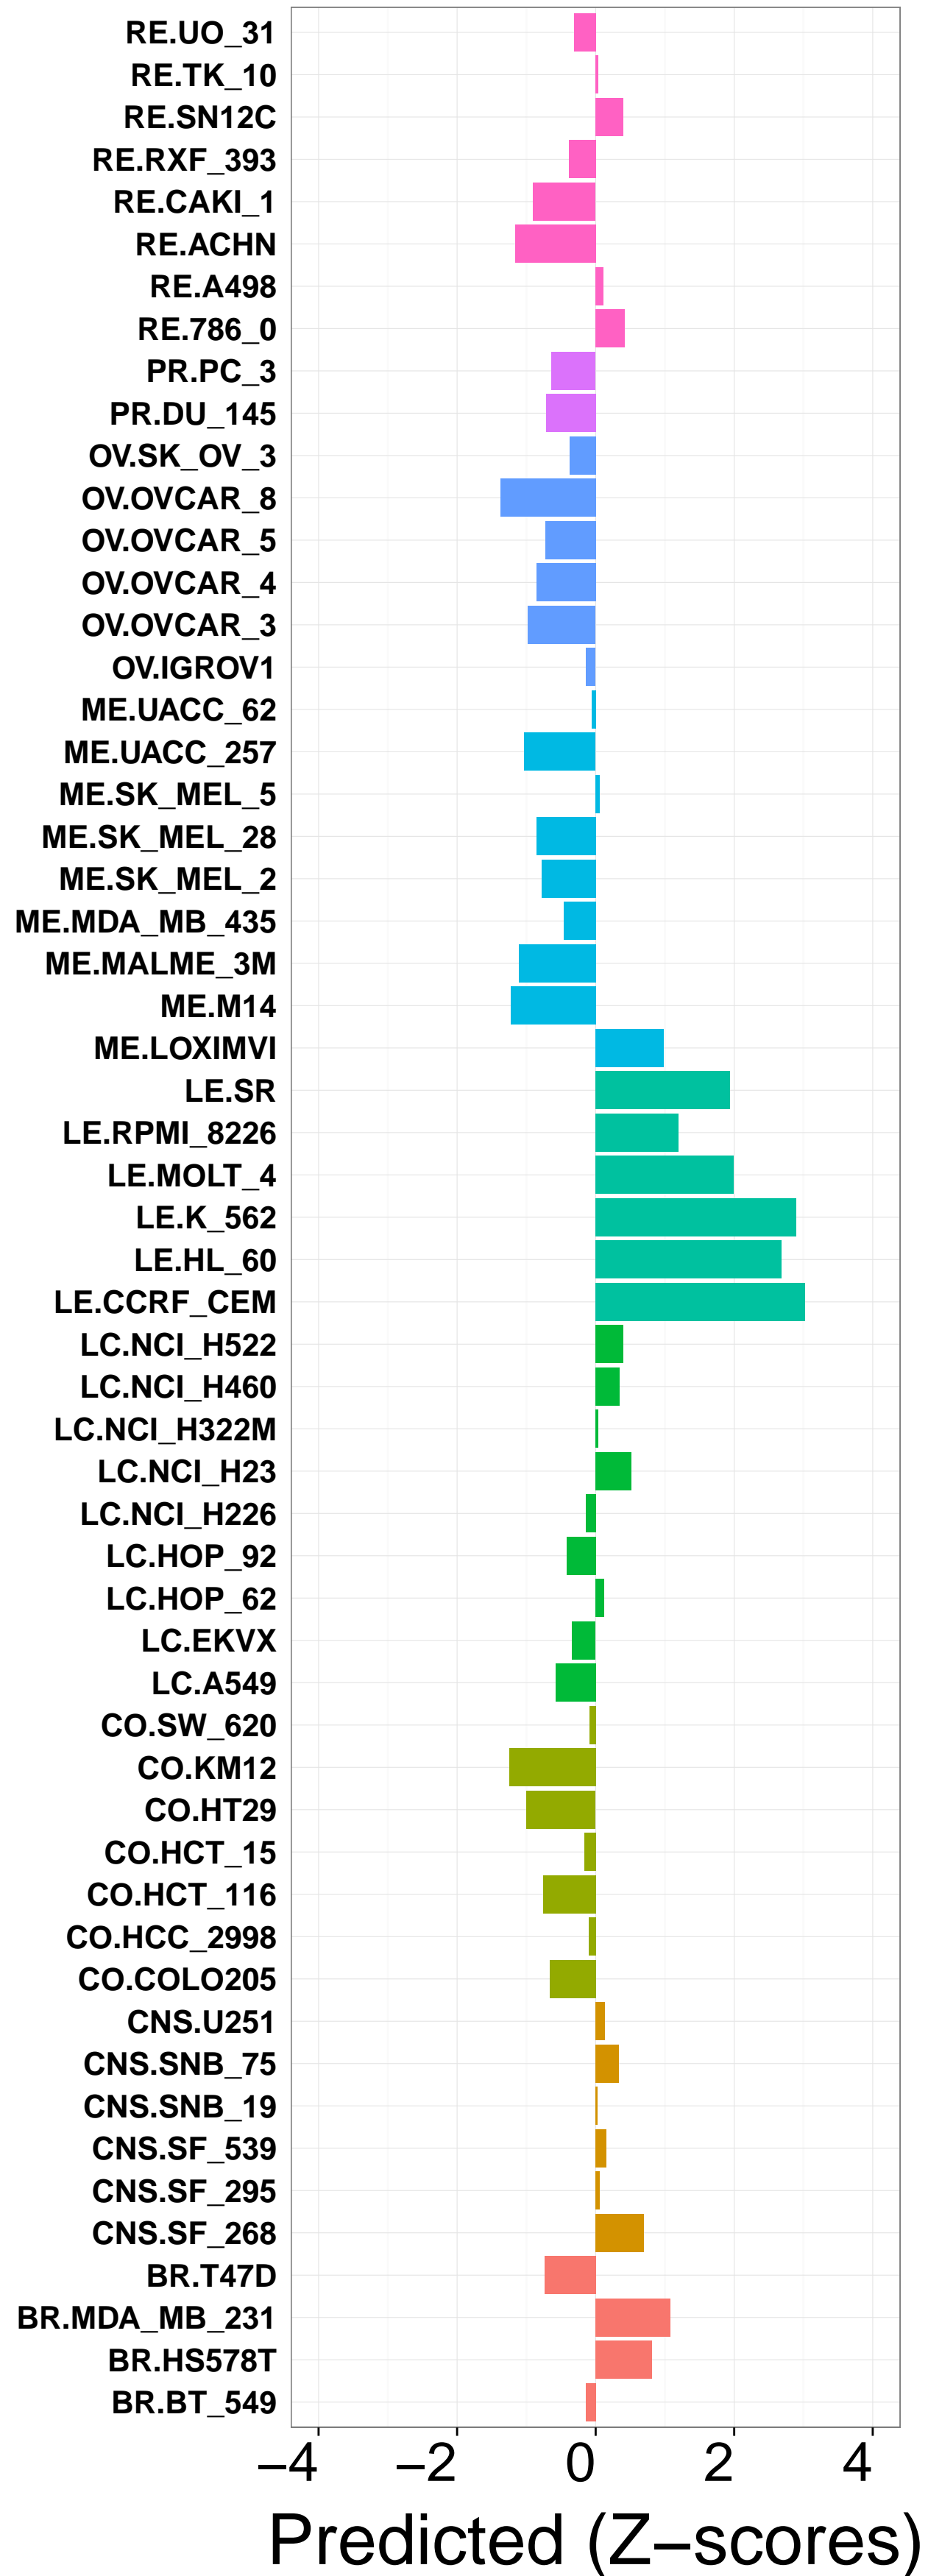

# NSC 255109, (LOCO)

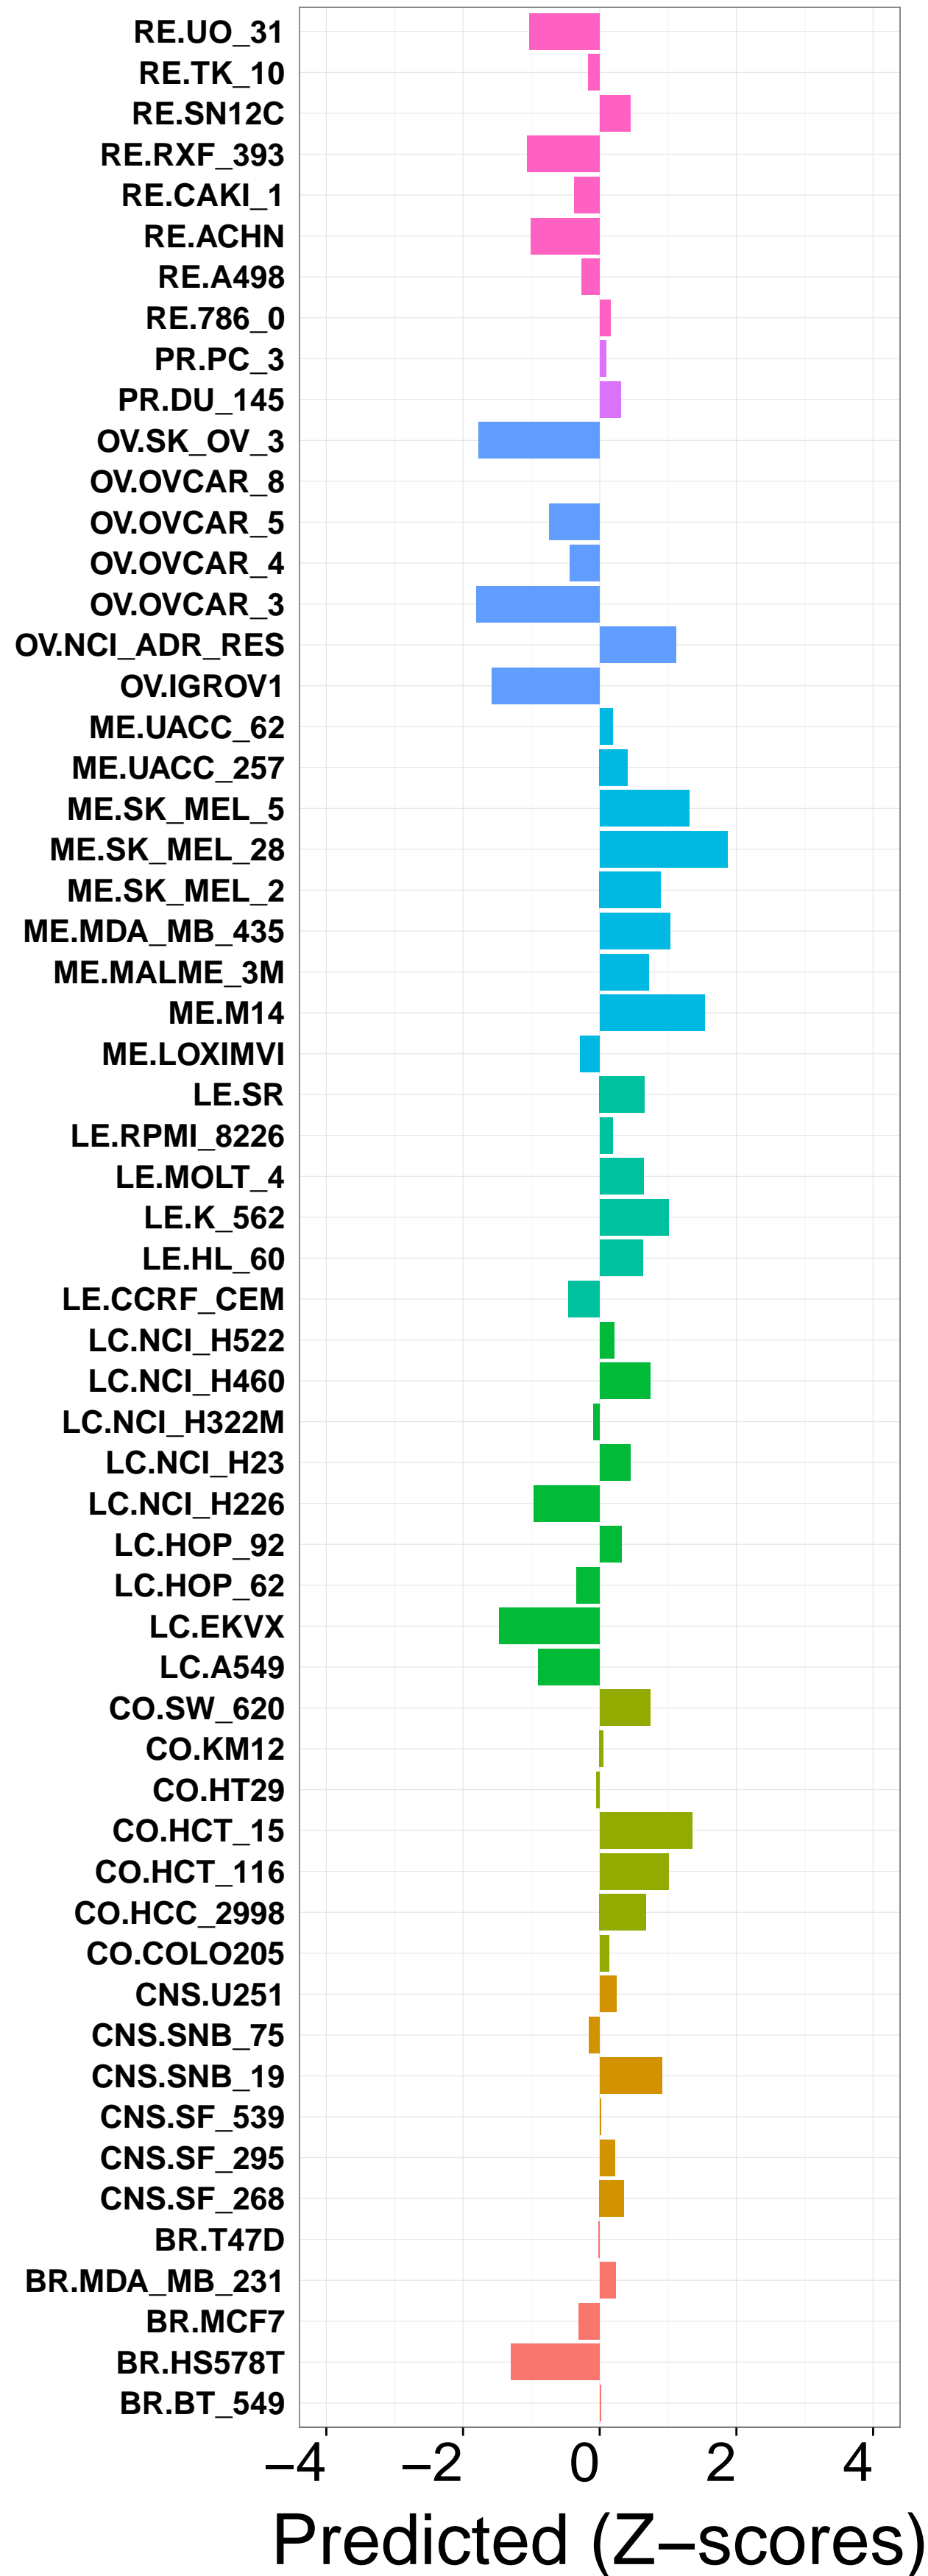

# NSC 256942, (LOCO)

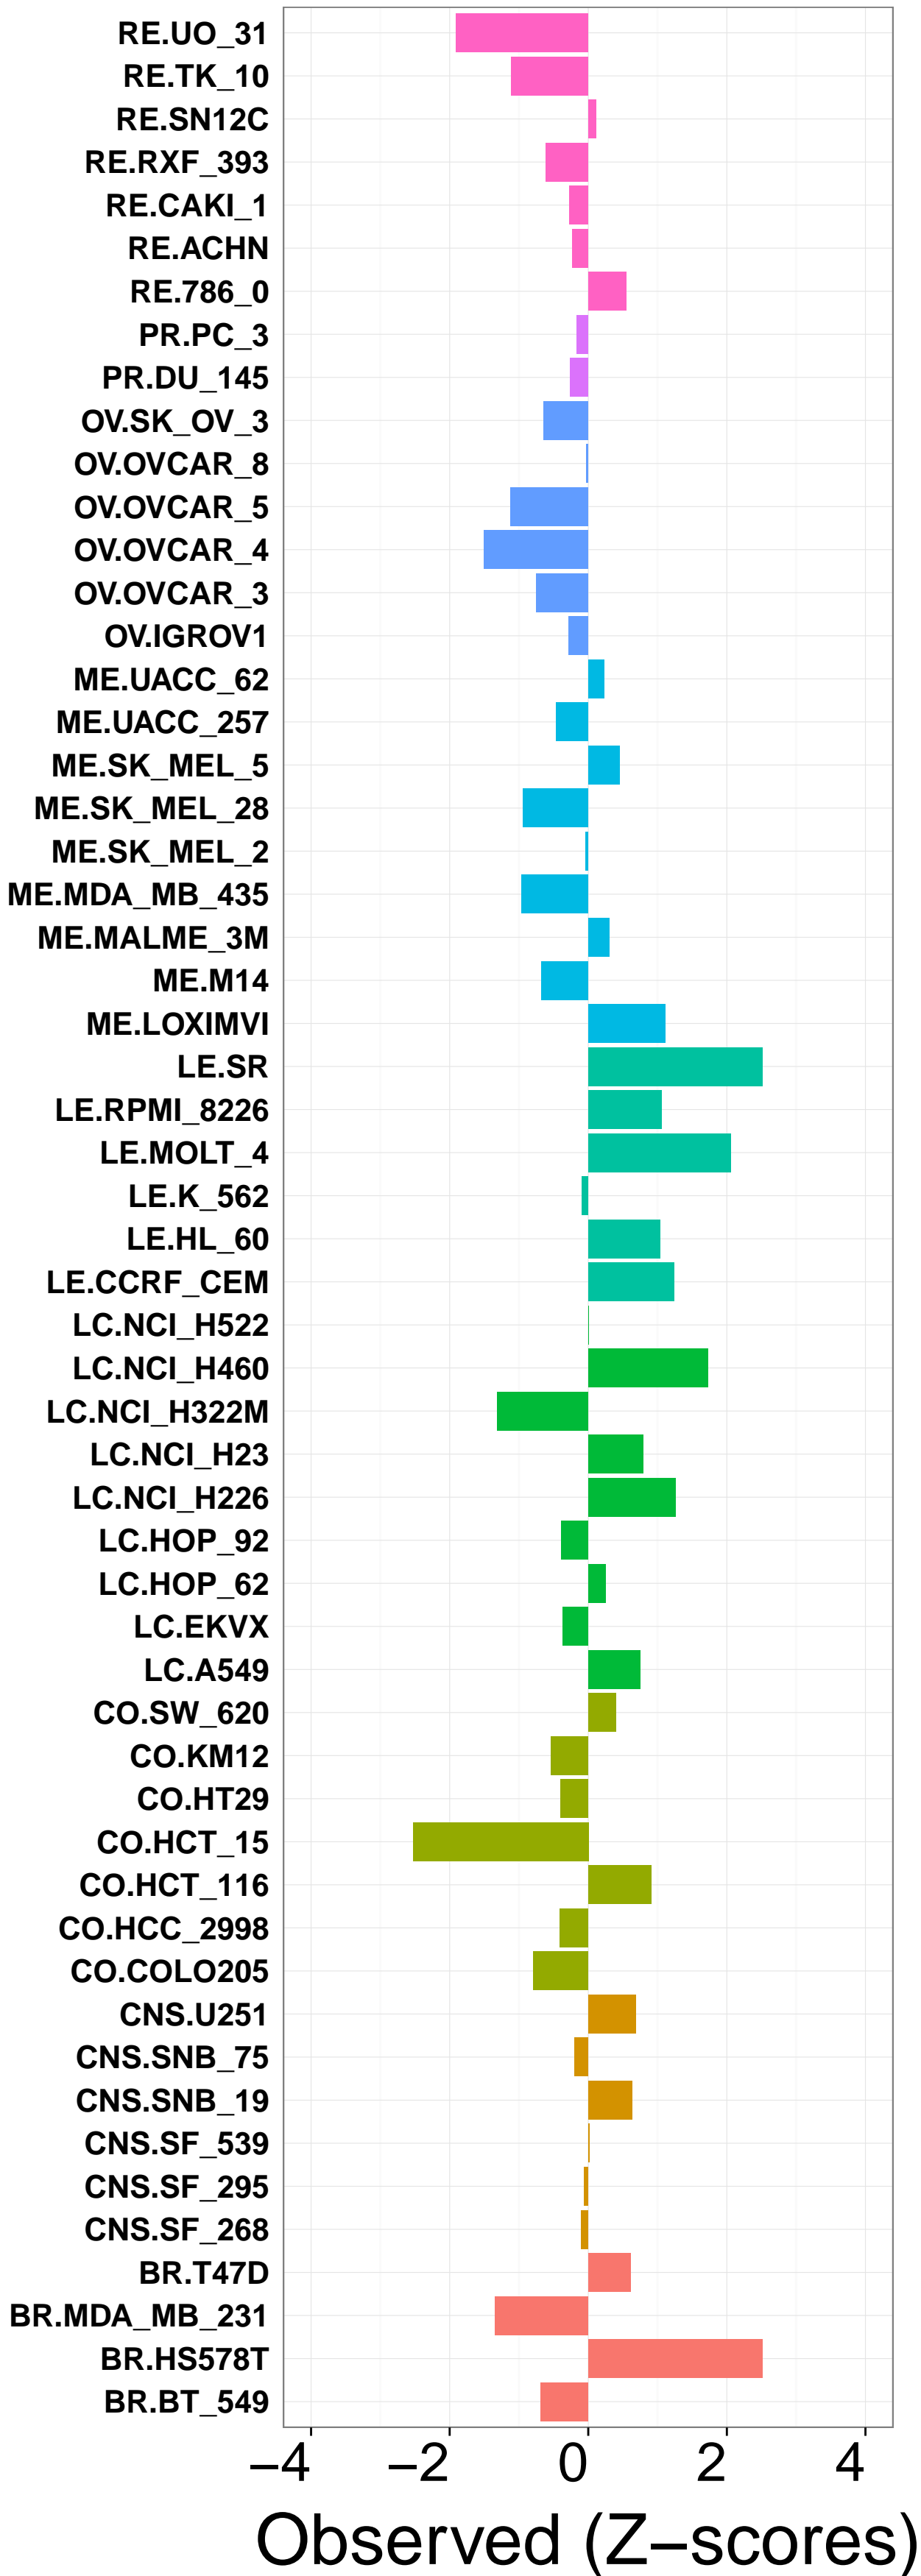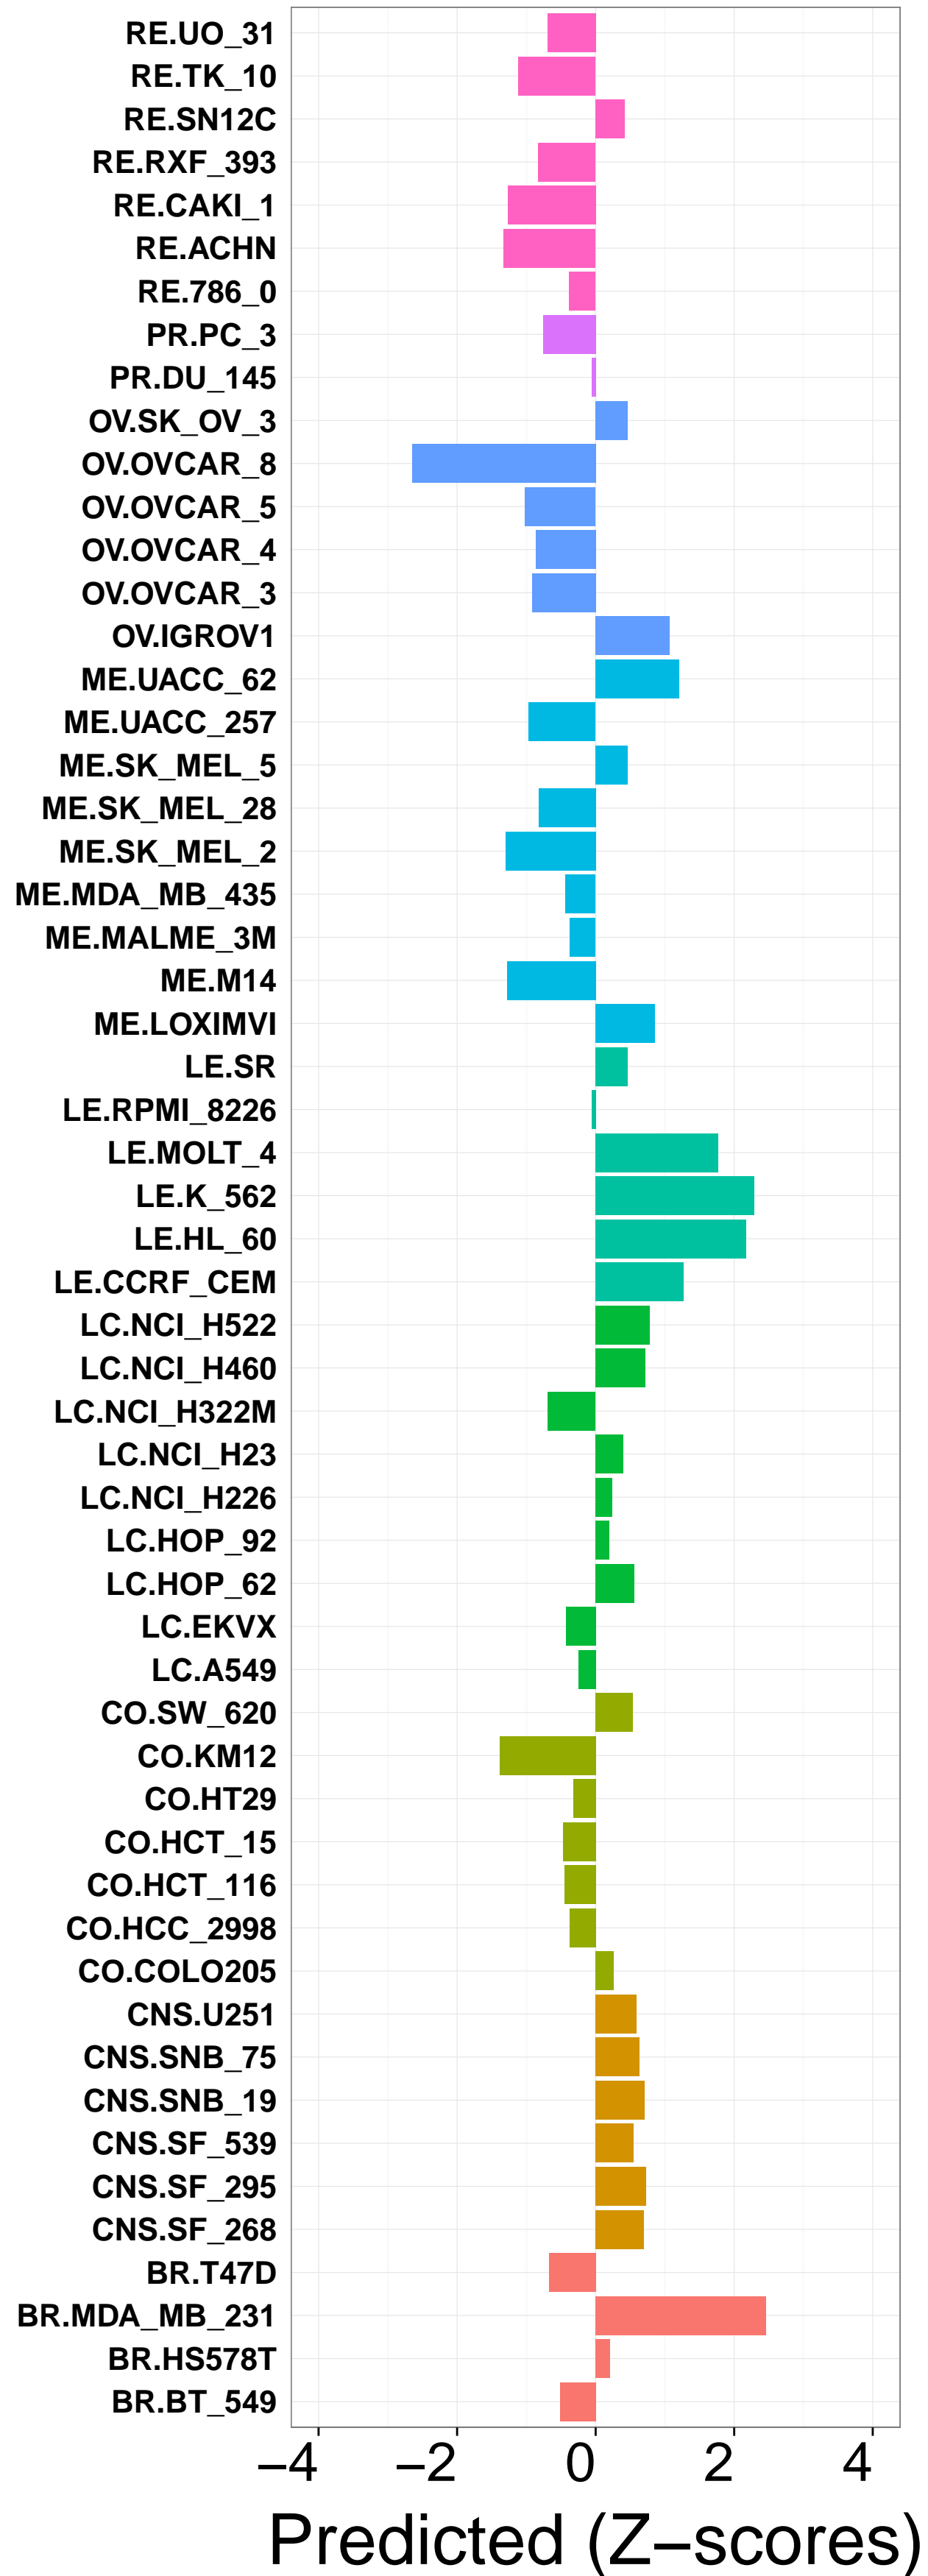

# NSC 26980, Mitomycin (LOCO)

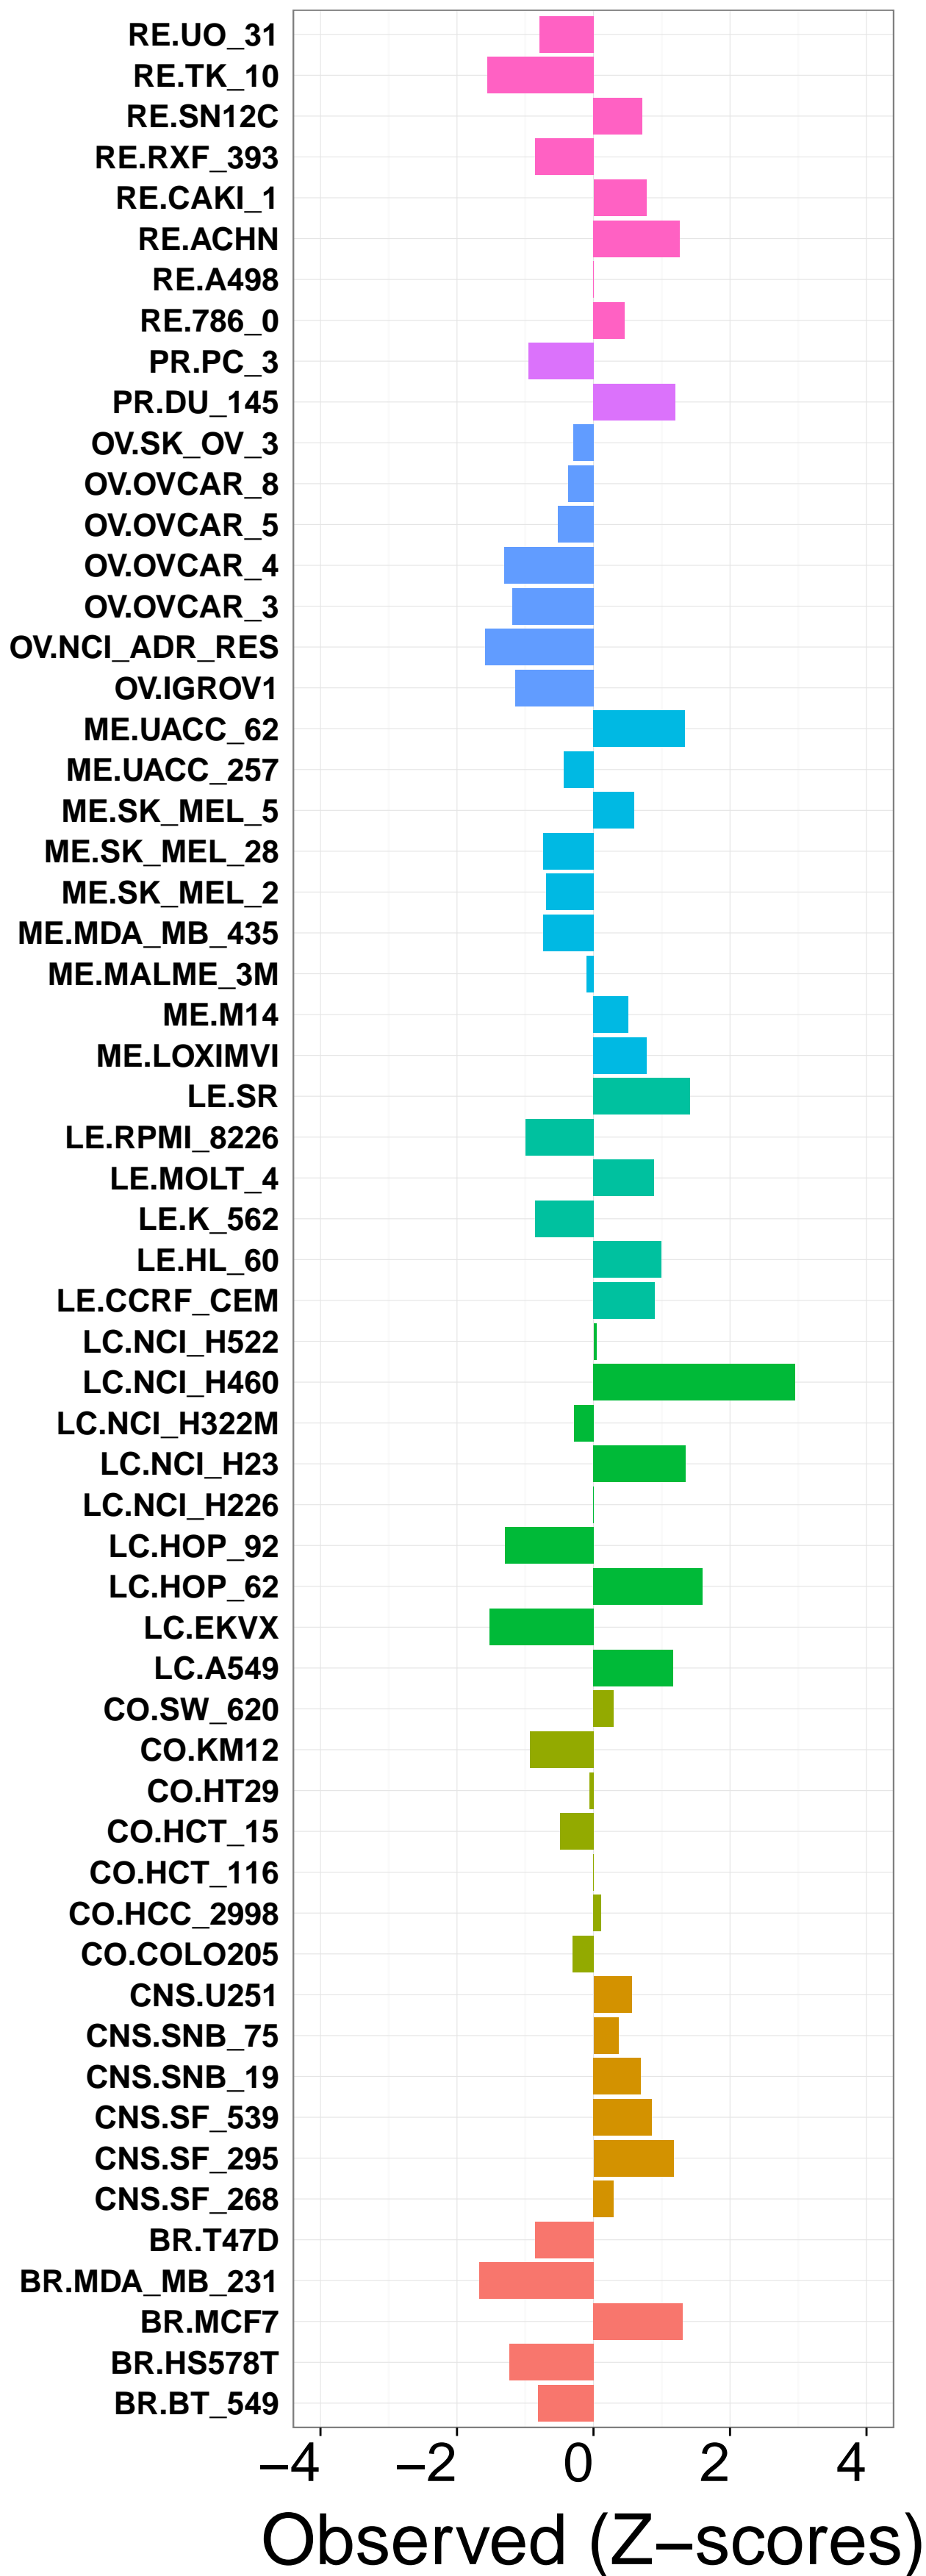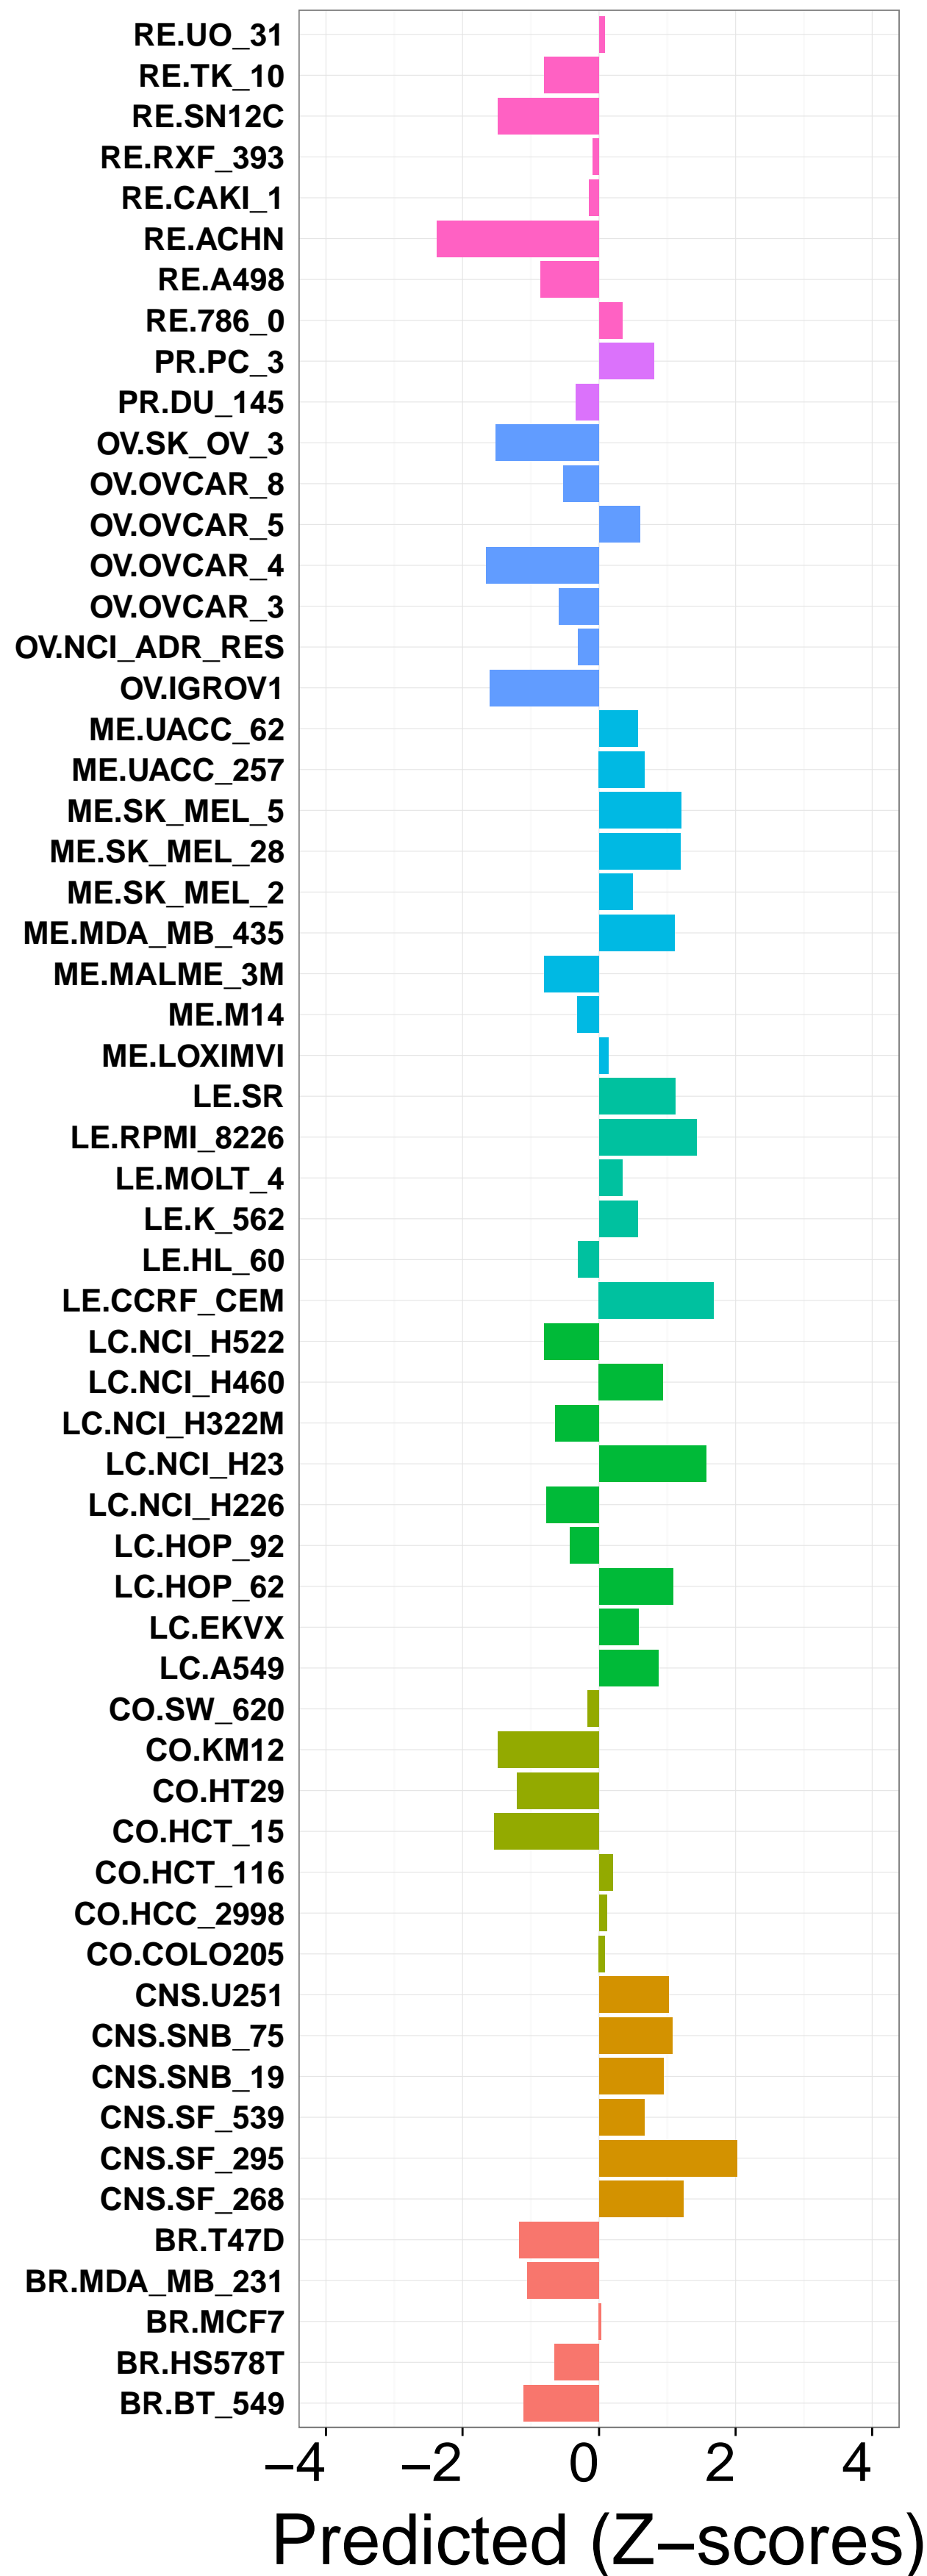

# NSC 27640, Floxuridine (LOCO)

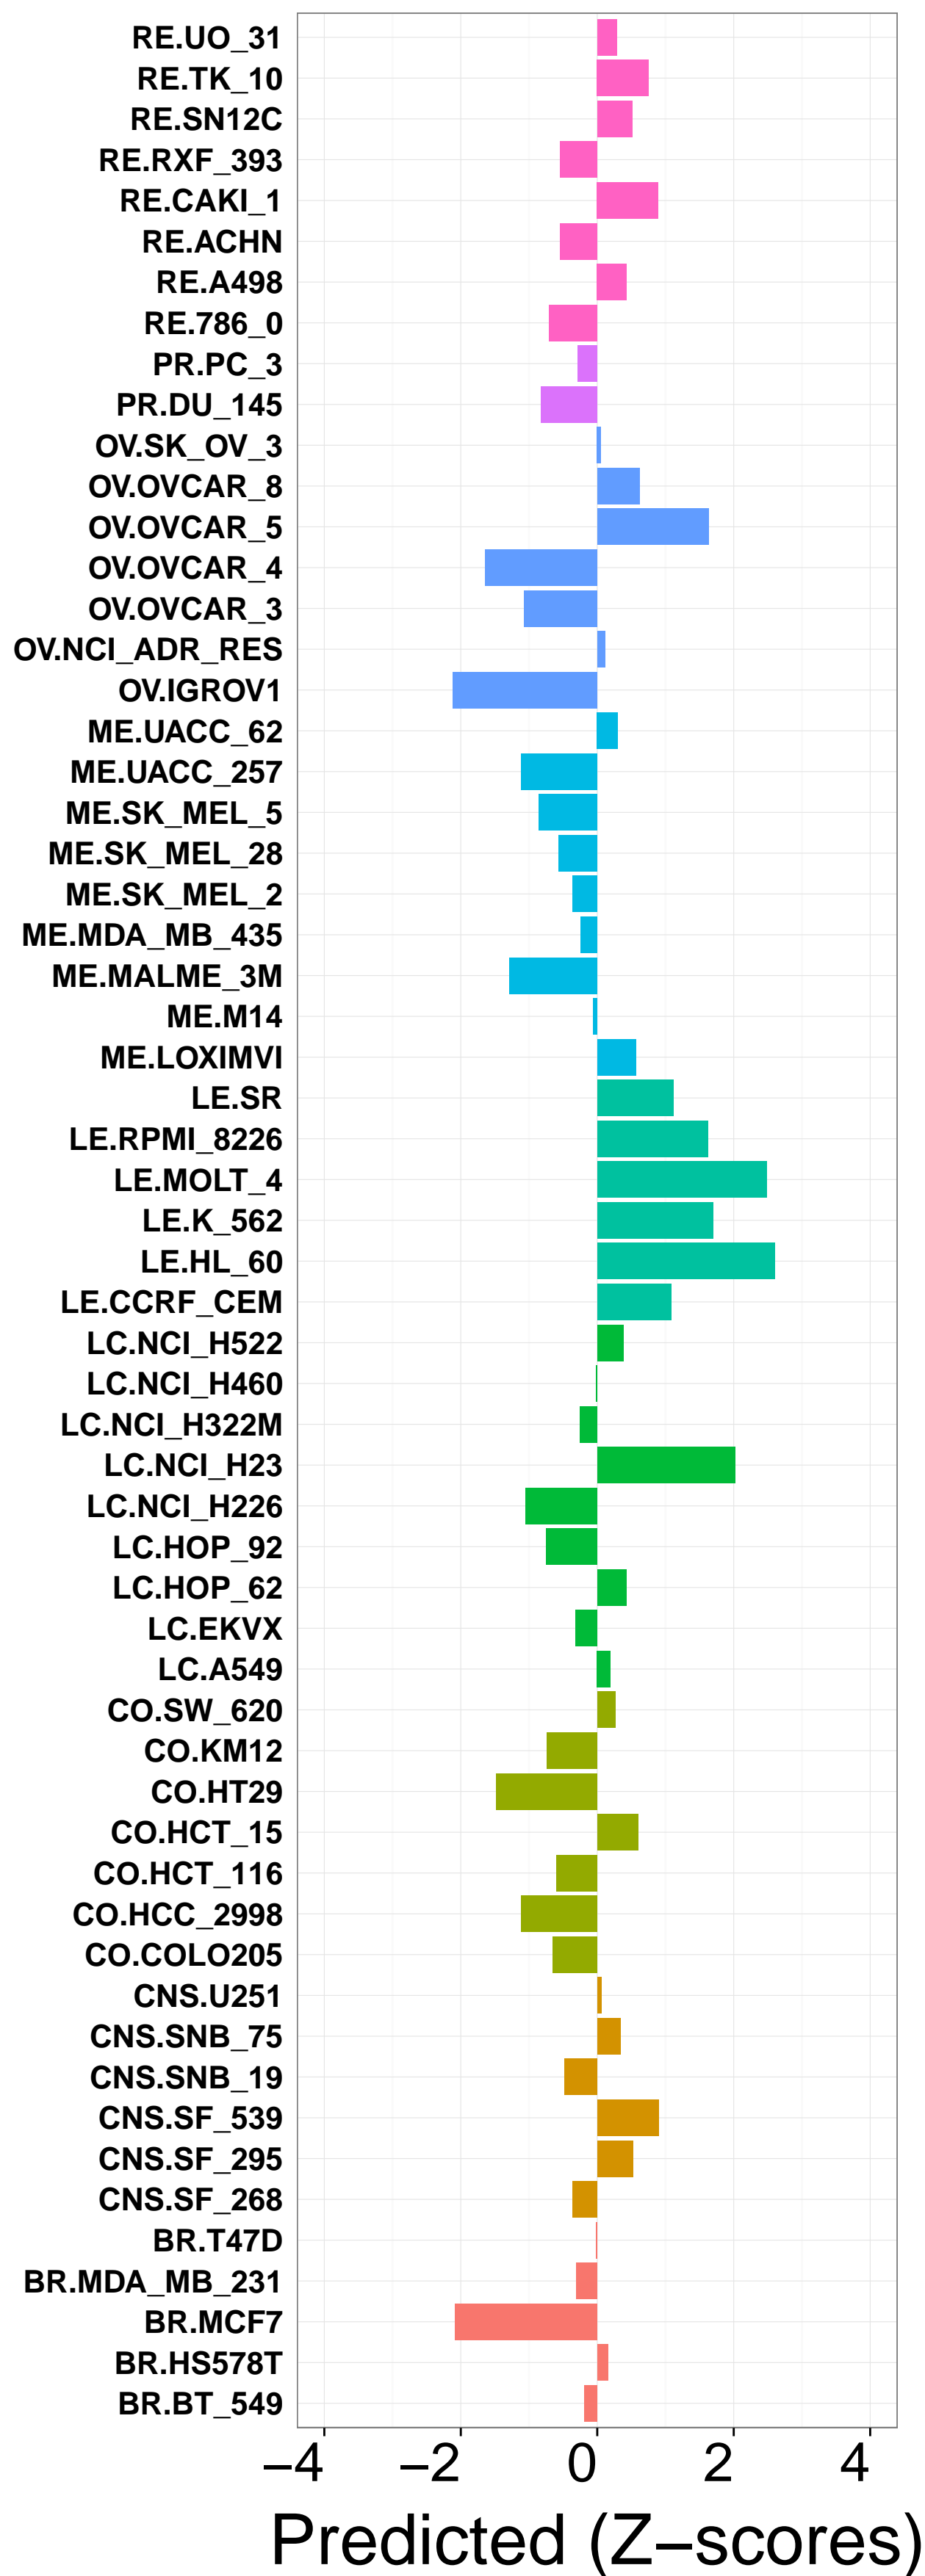



# NSC 279836, (LOCO)

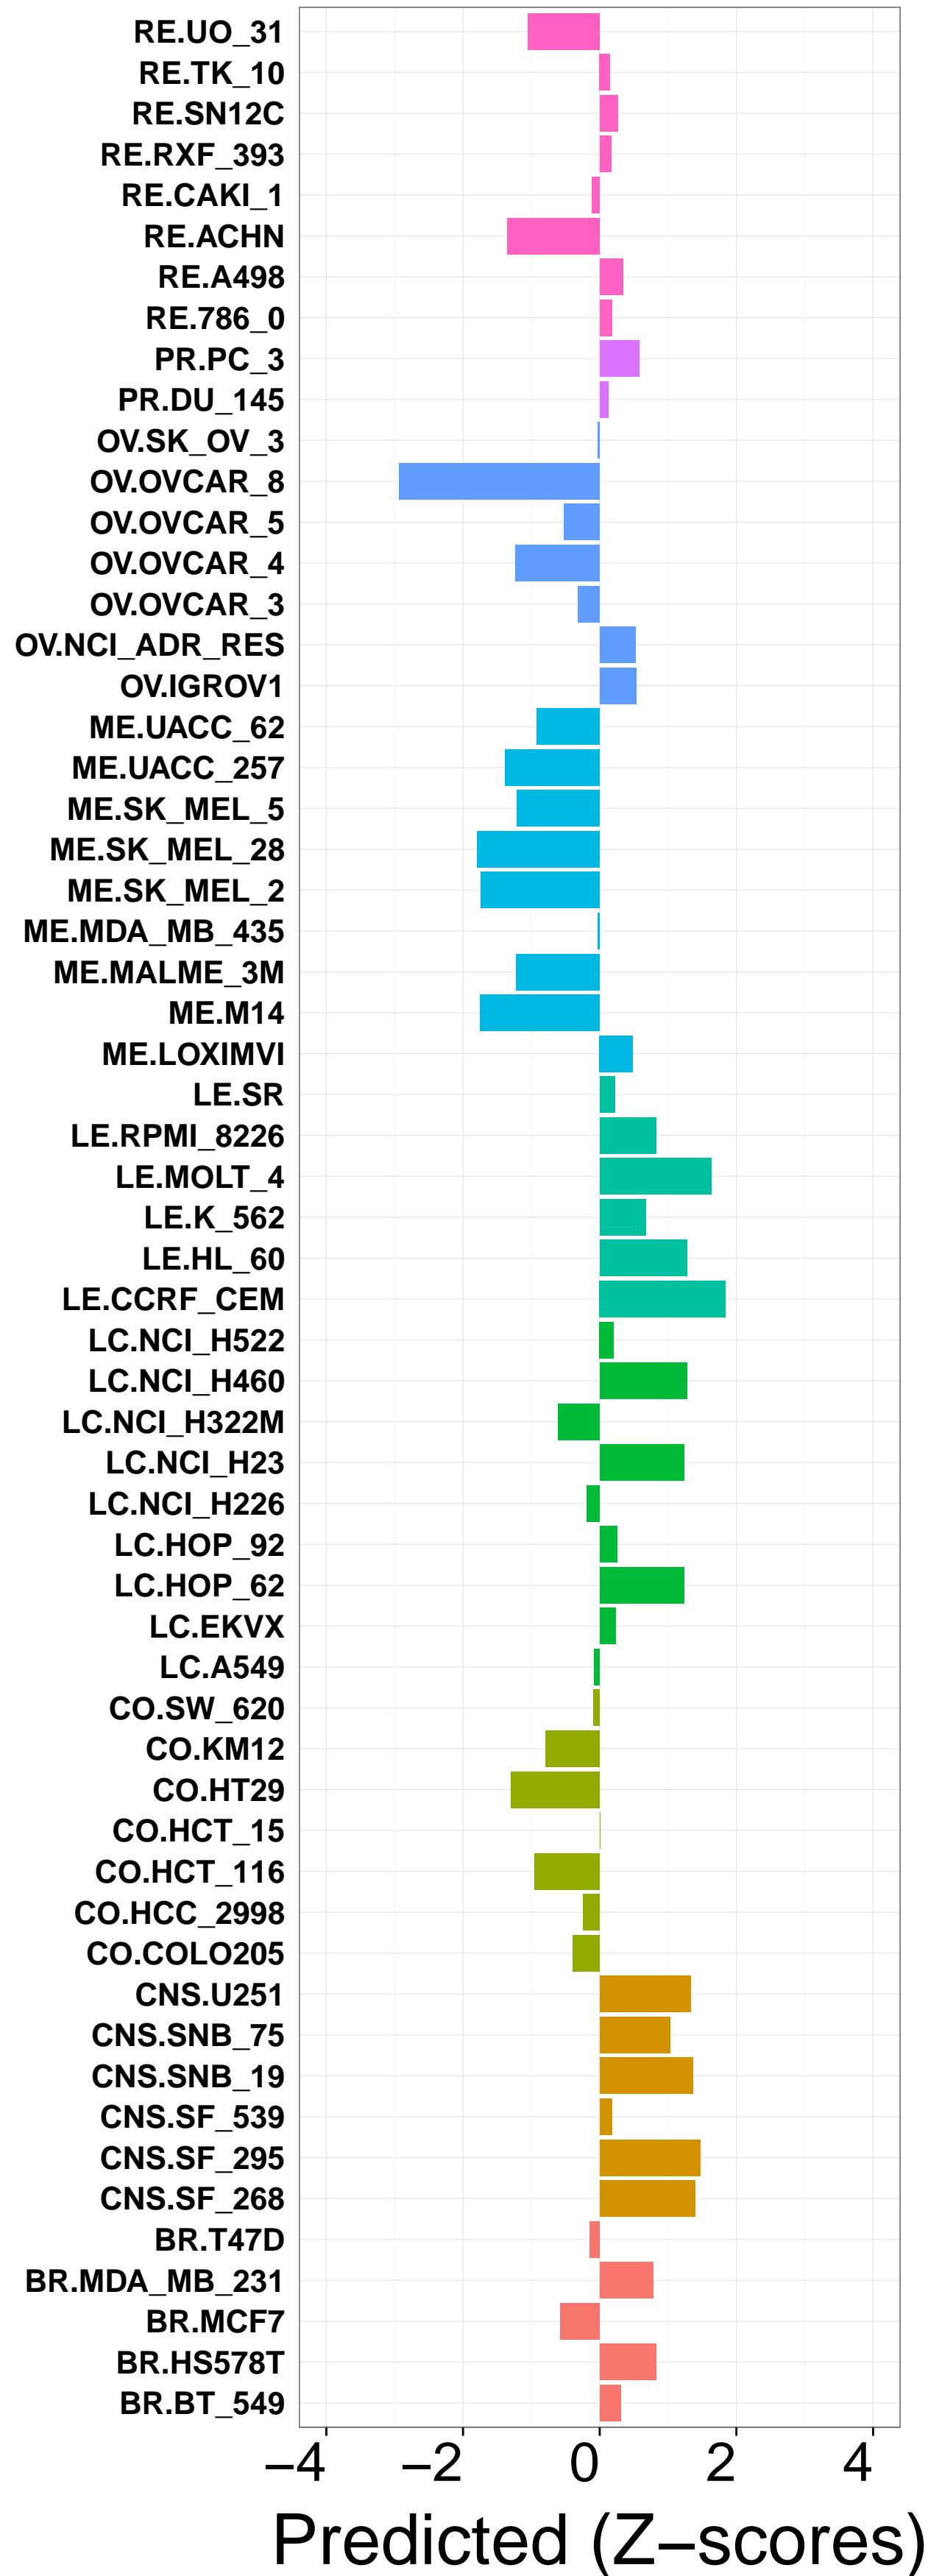

# NSC 280594, (LOCO)

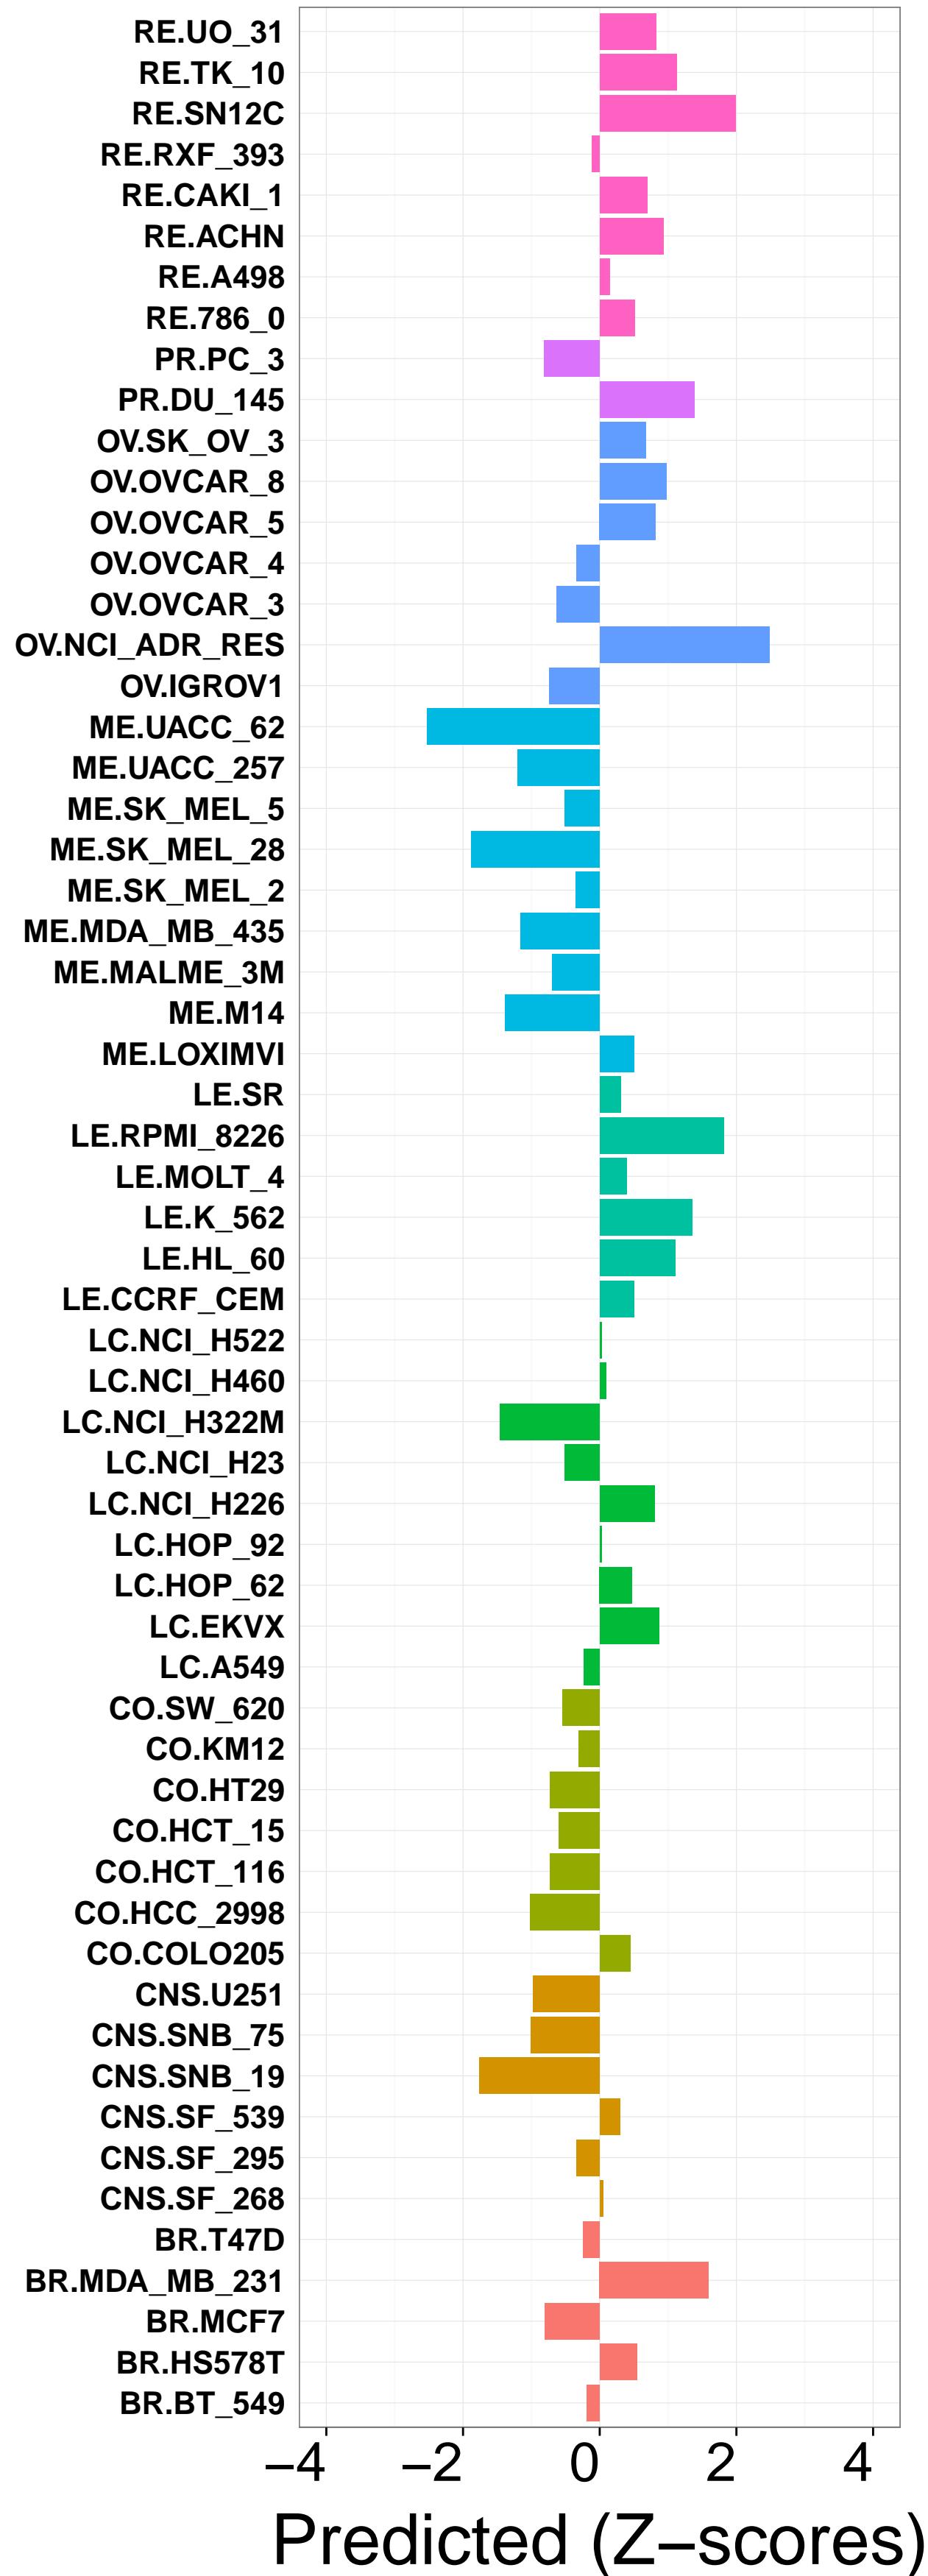

# NSC 281612, (LOCO)

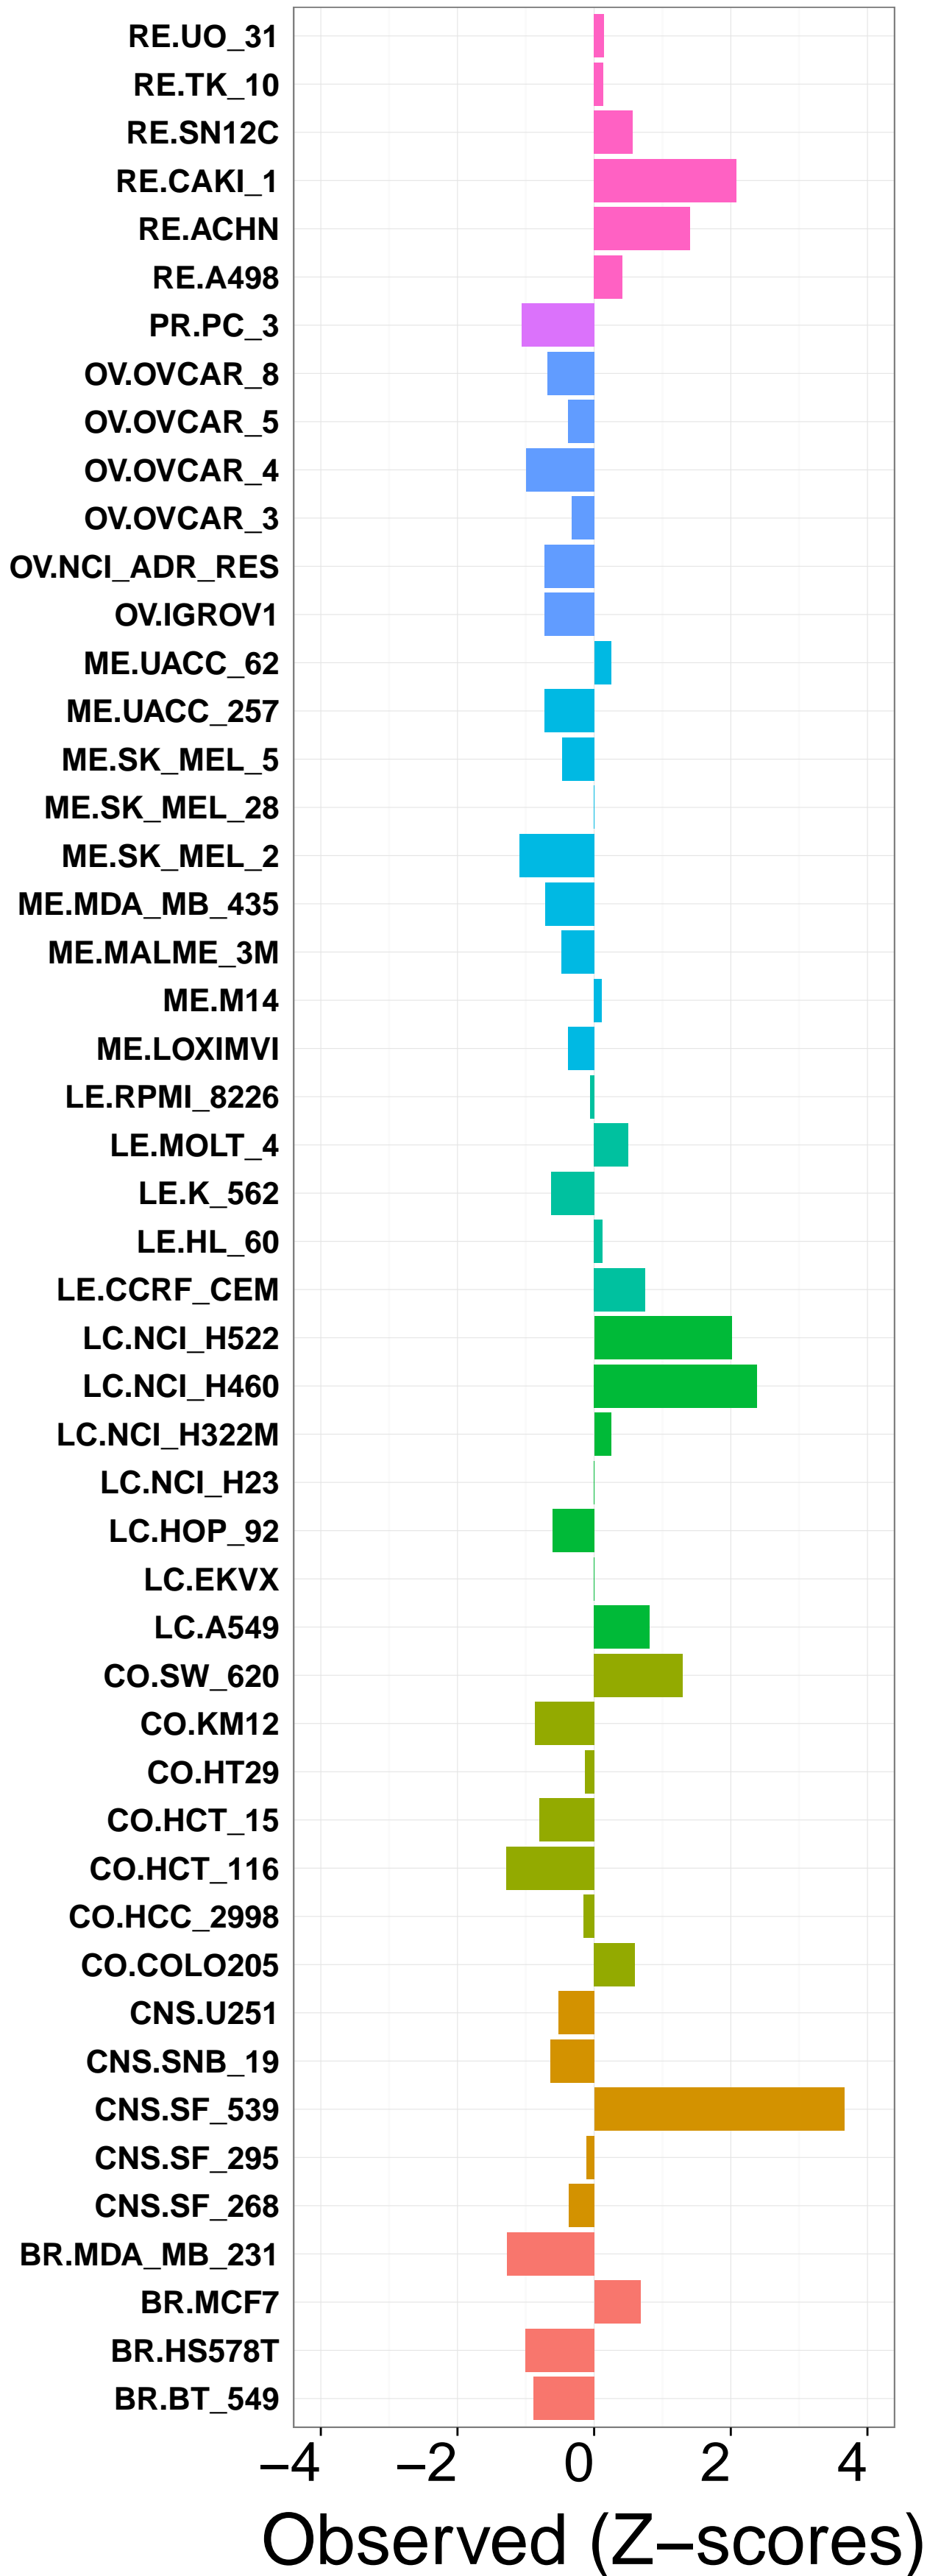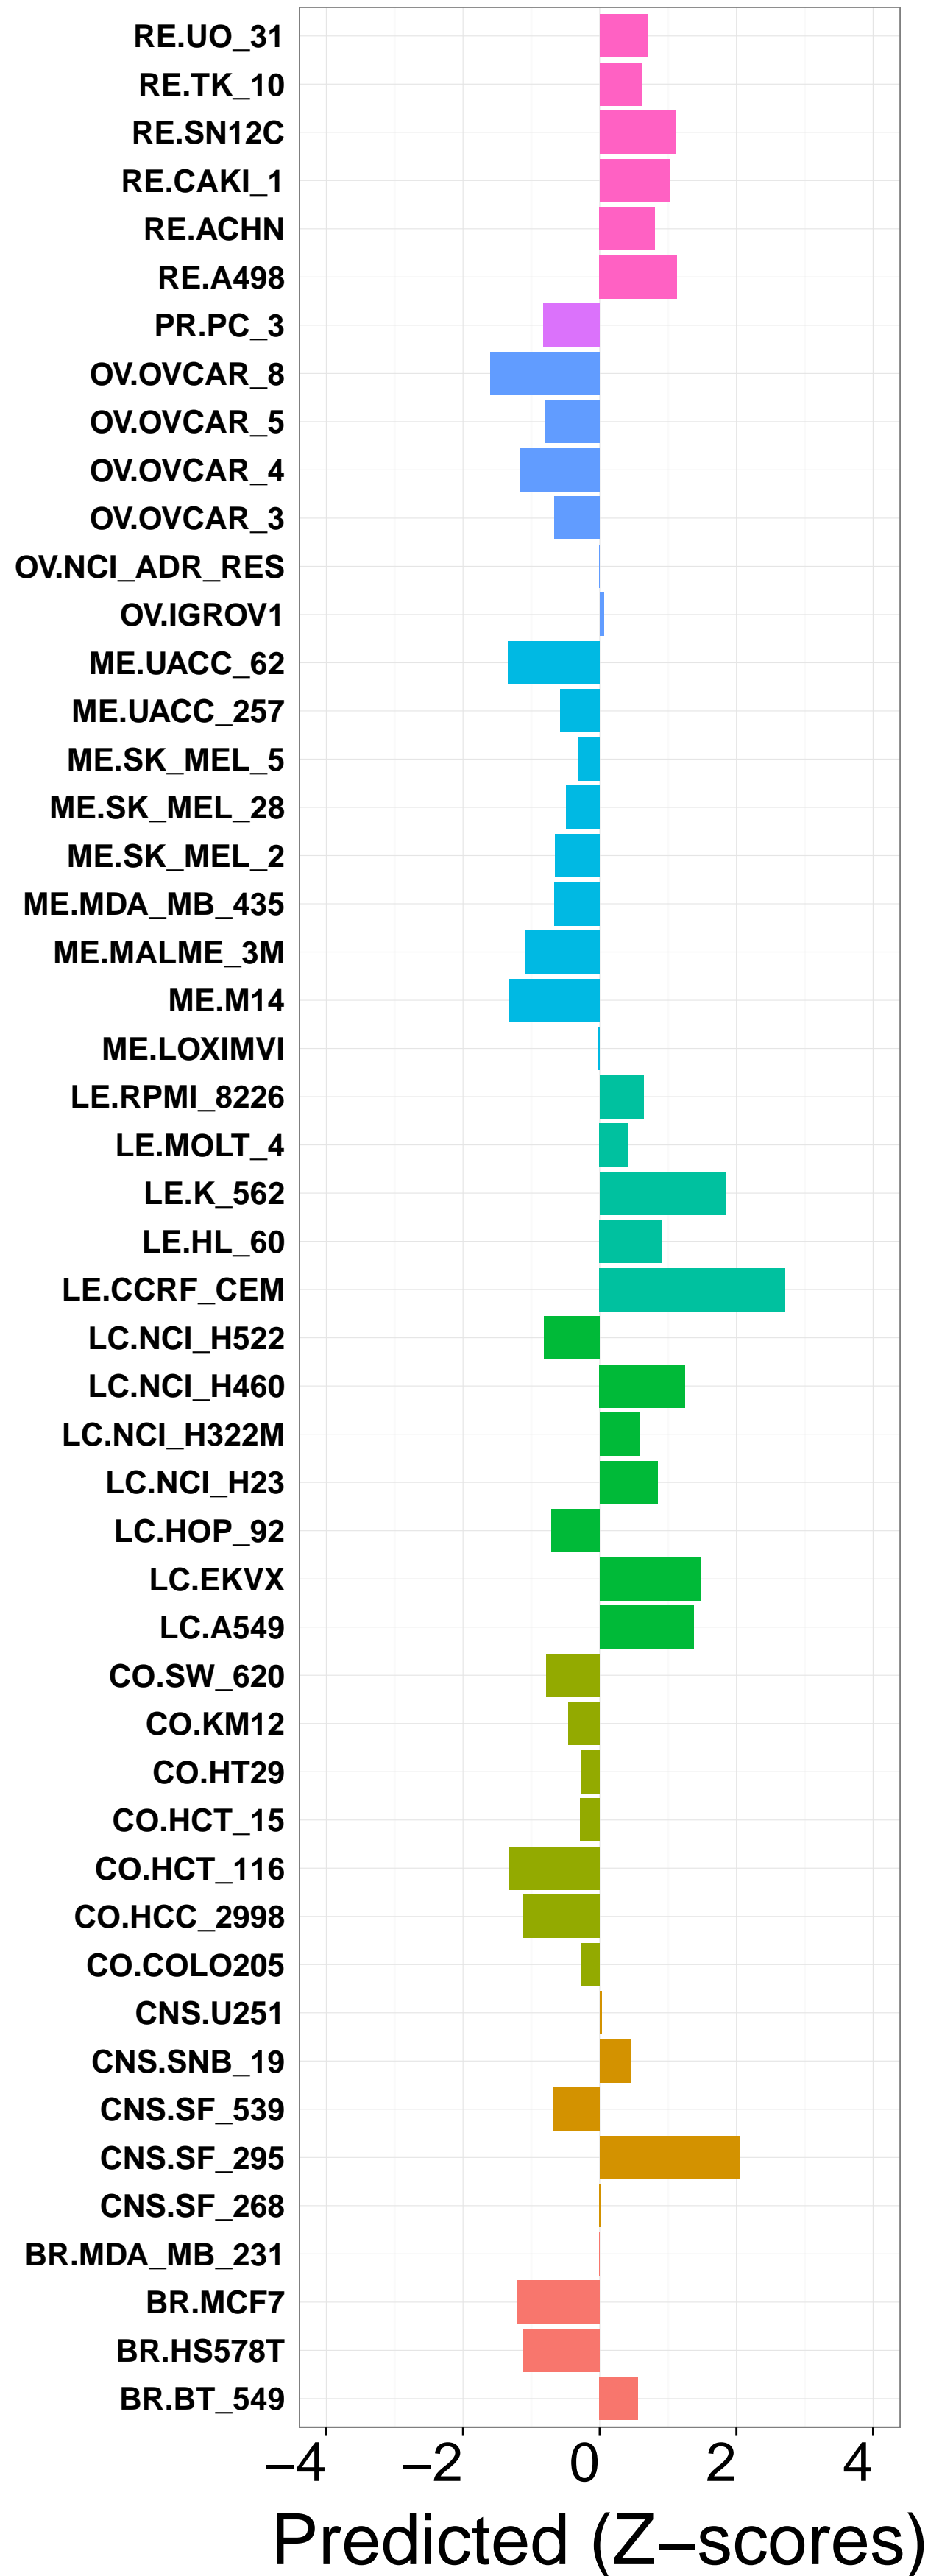

# NSC 287459, (LOCO)

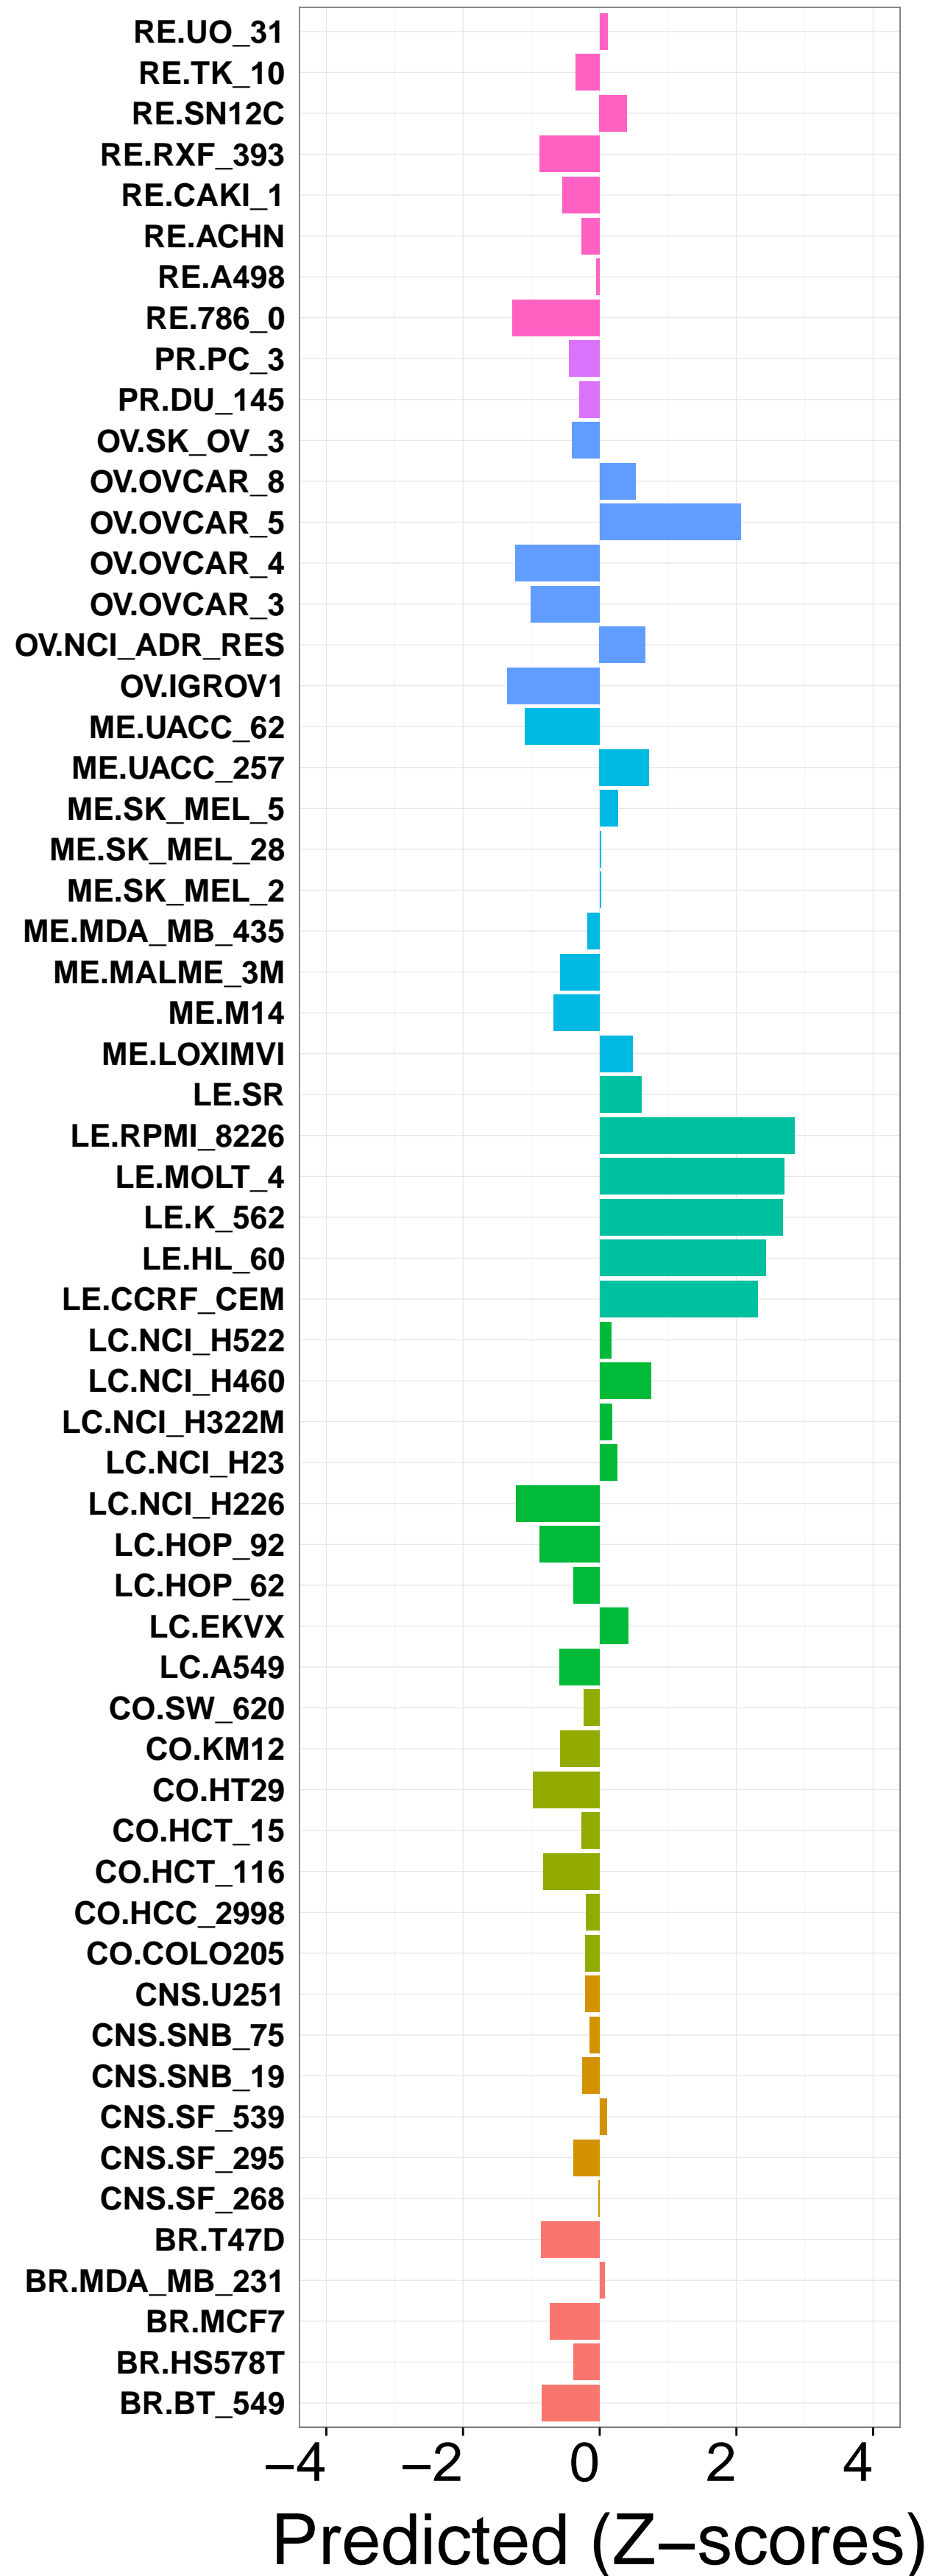

# NSC 301739, (LOCO)





# NSC 312887, Fludarabine\_phosphate\_(USAN) (LOCO)

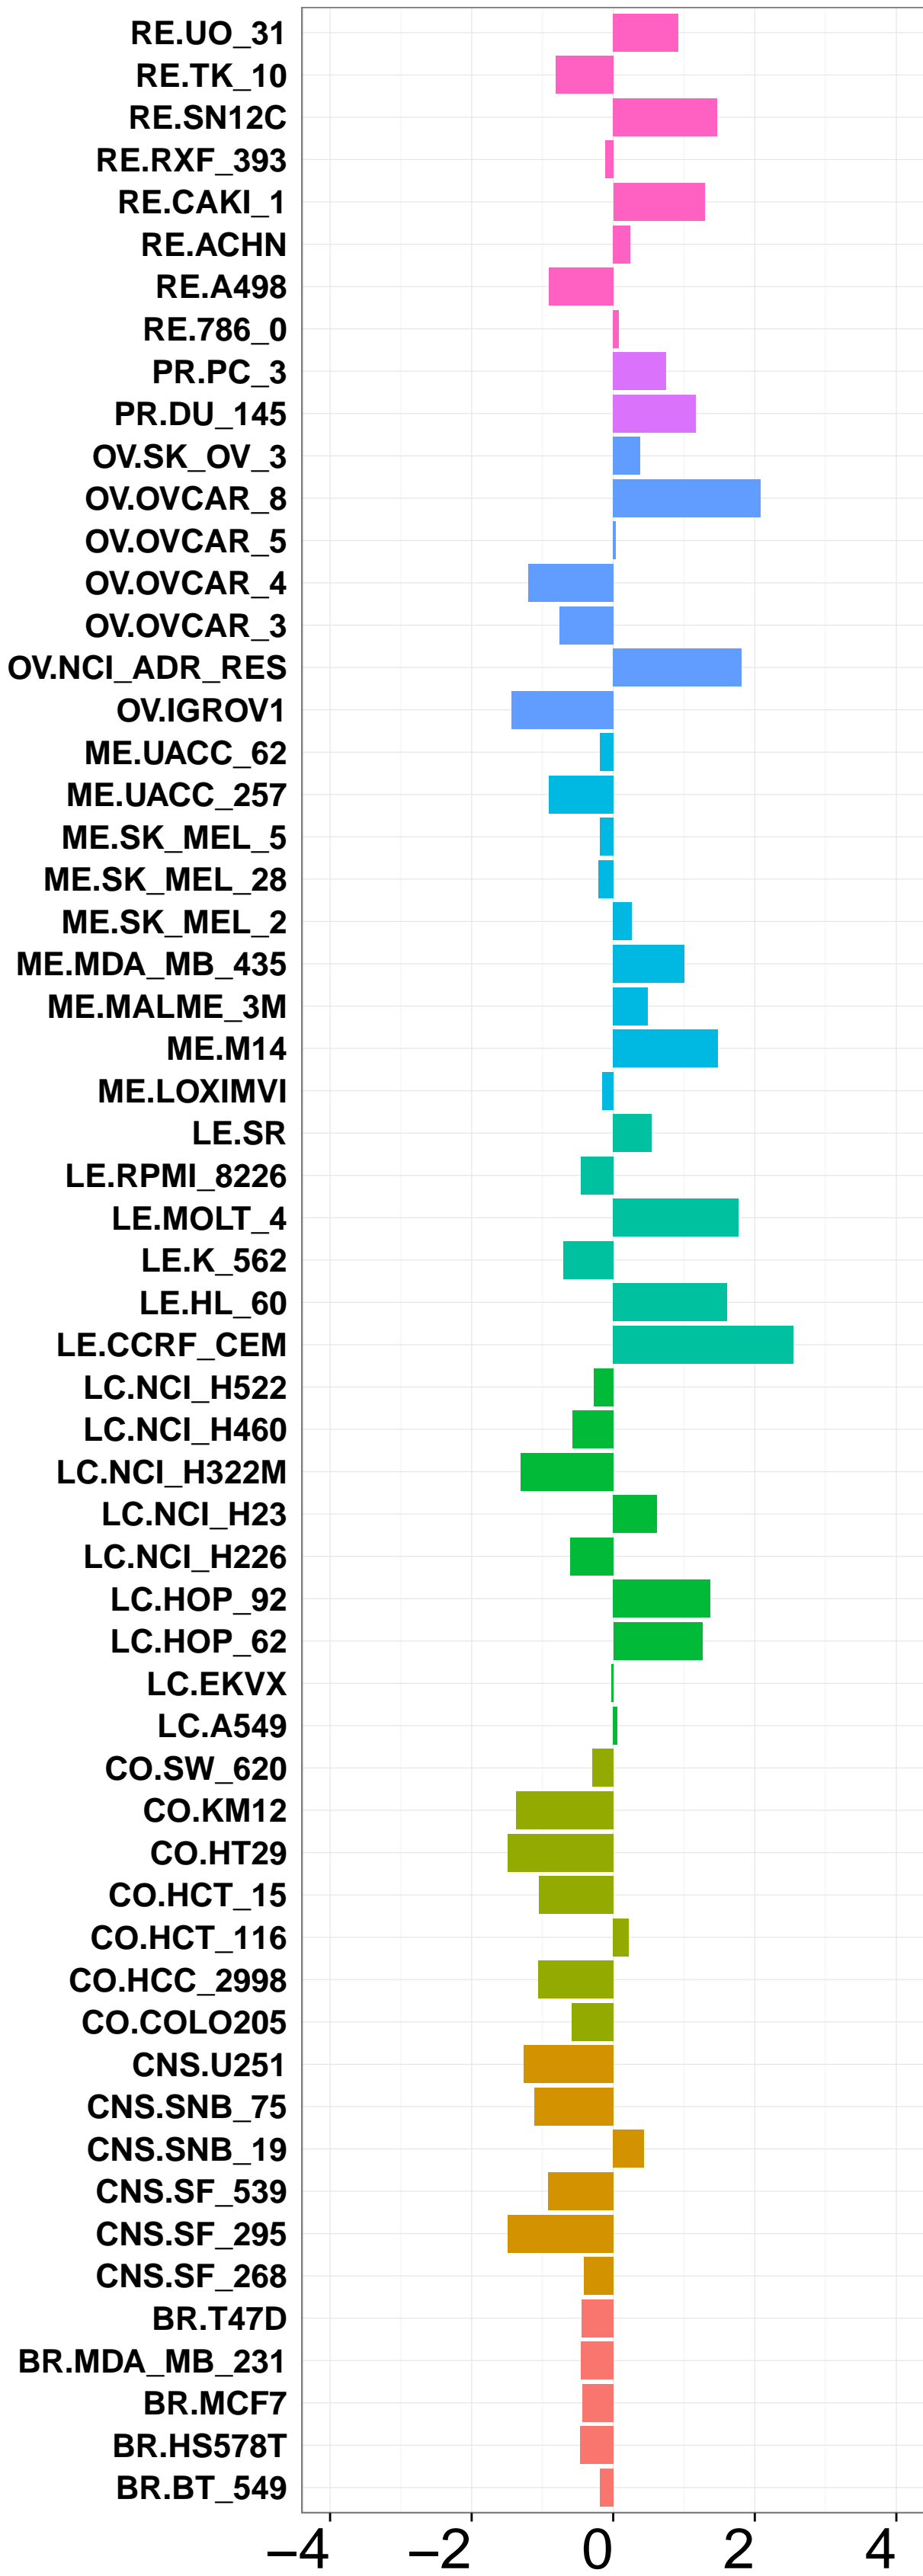

Observed (Z-scores)

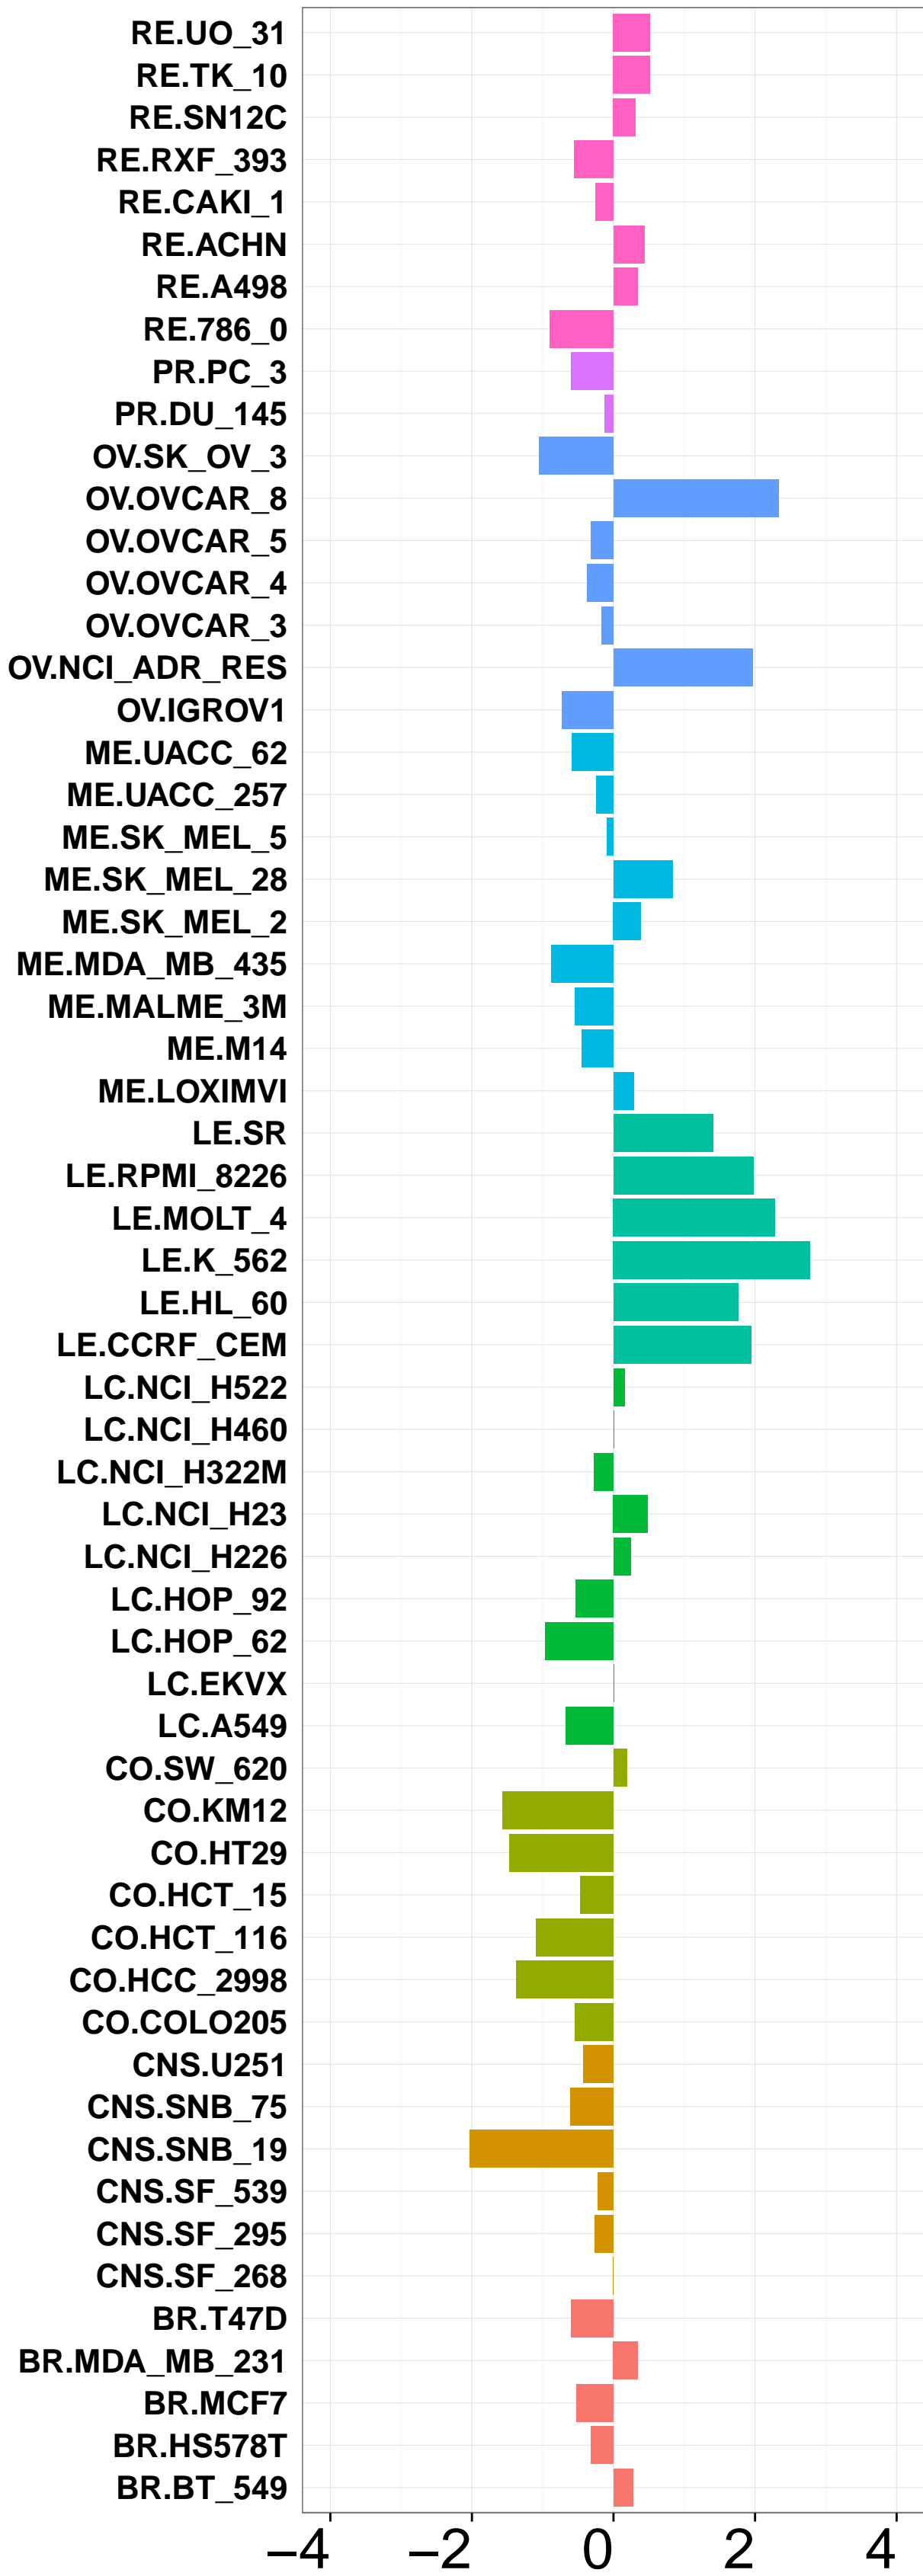

Predicted (Z-scores)

# NSC 330507, Tanespimycin (LOCO)

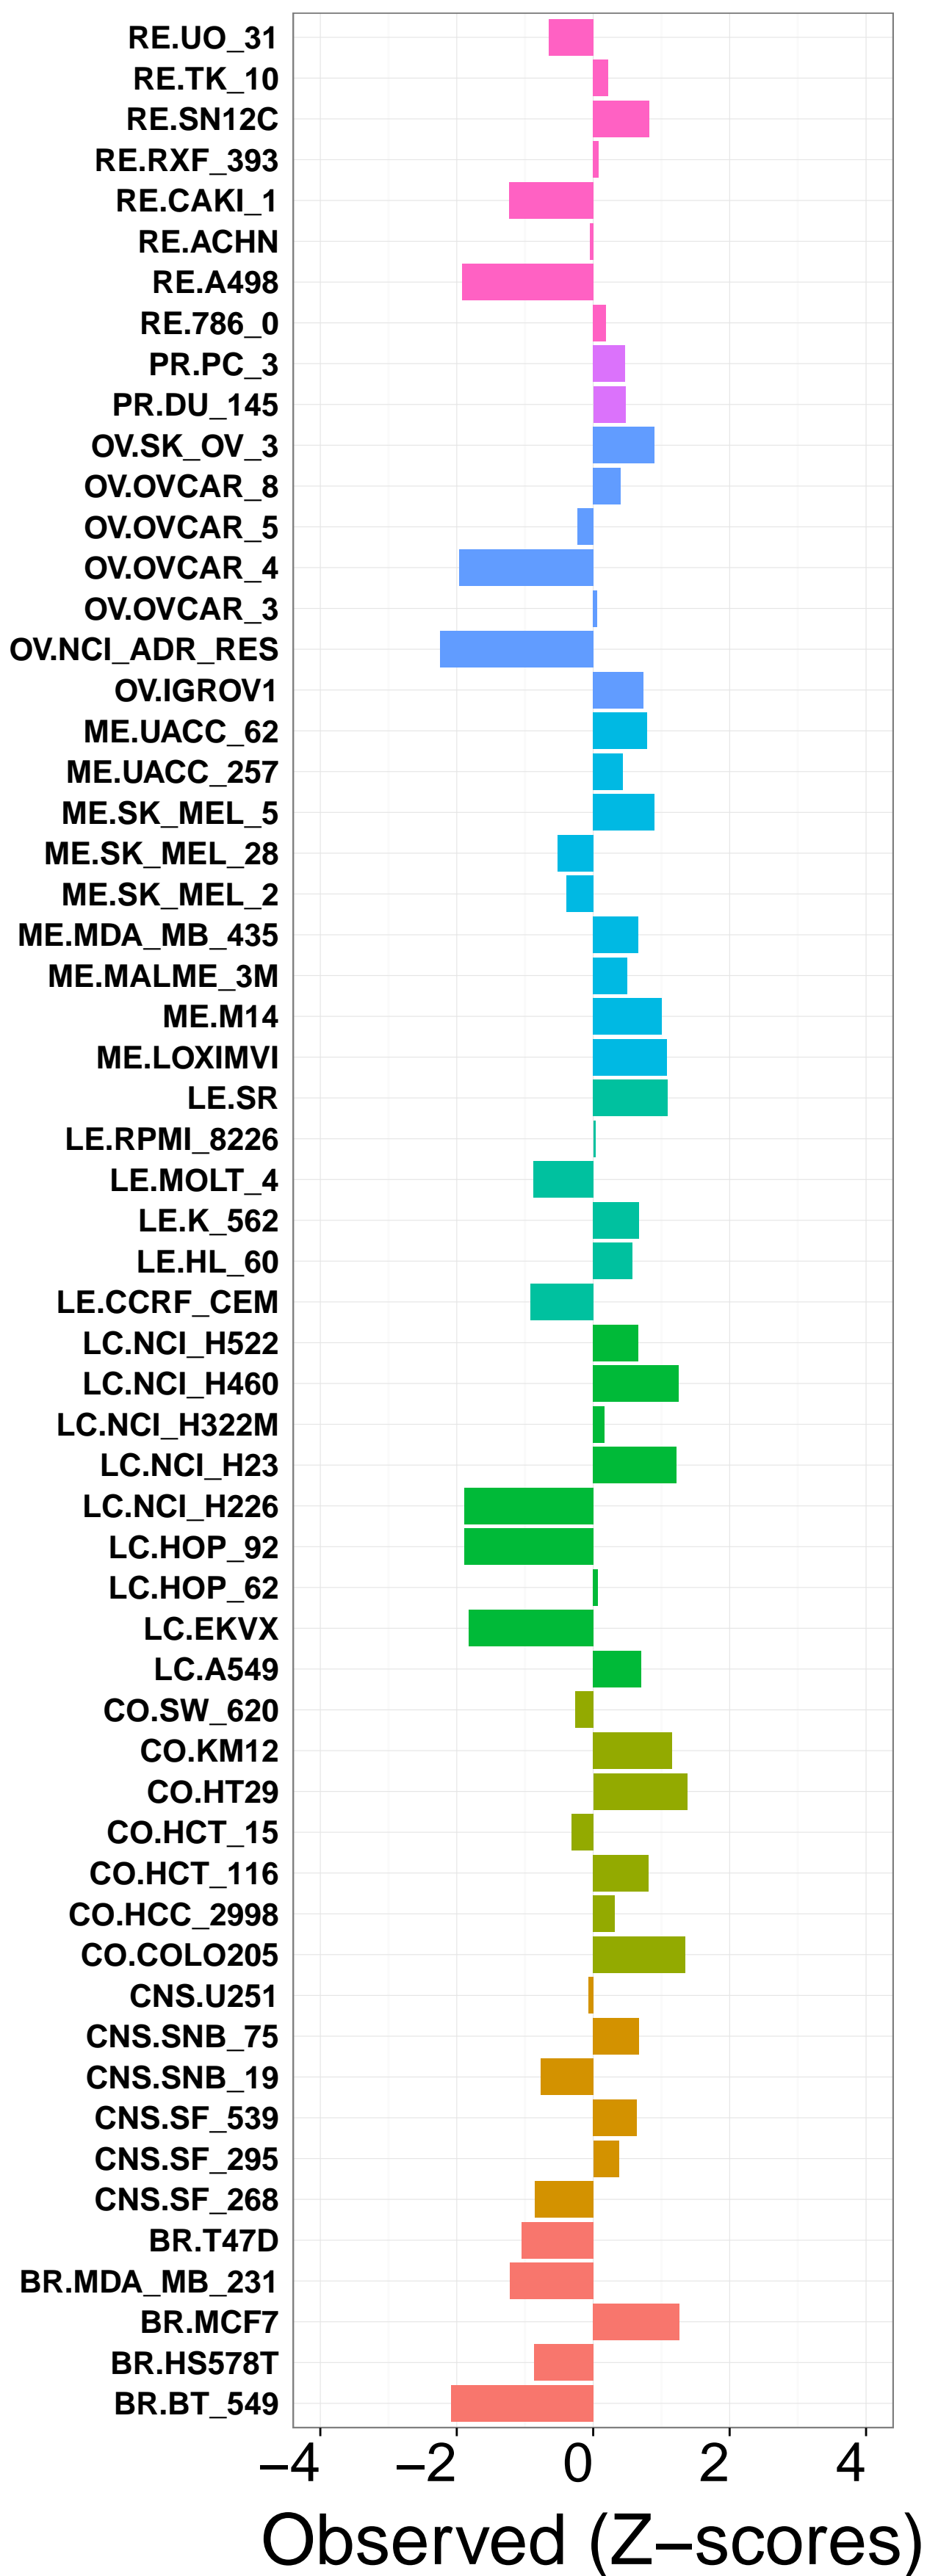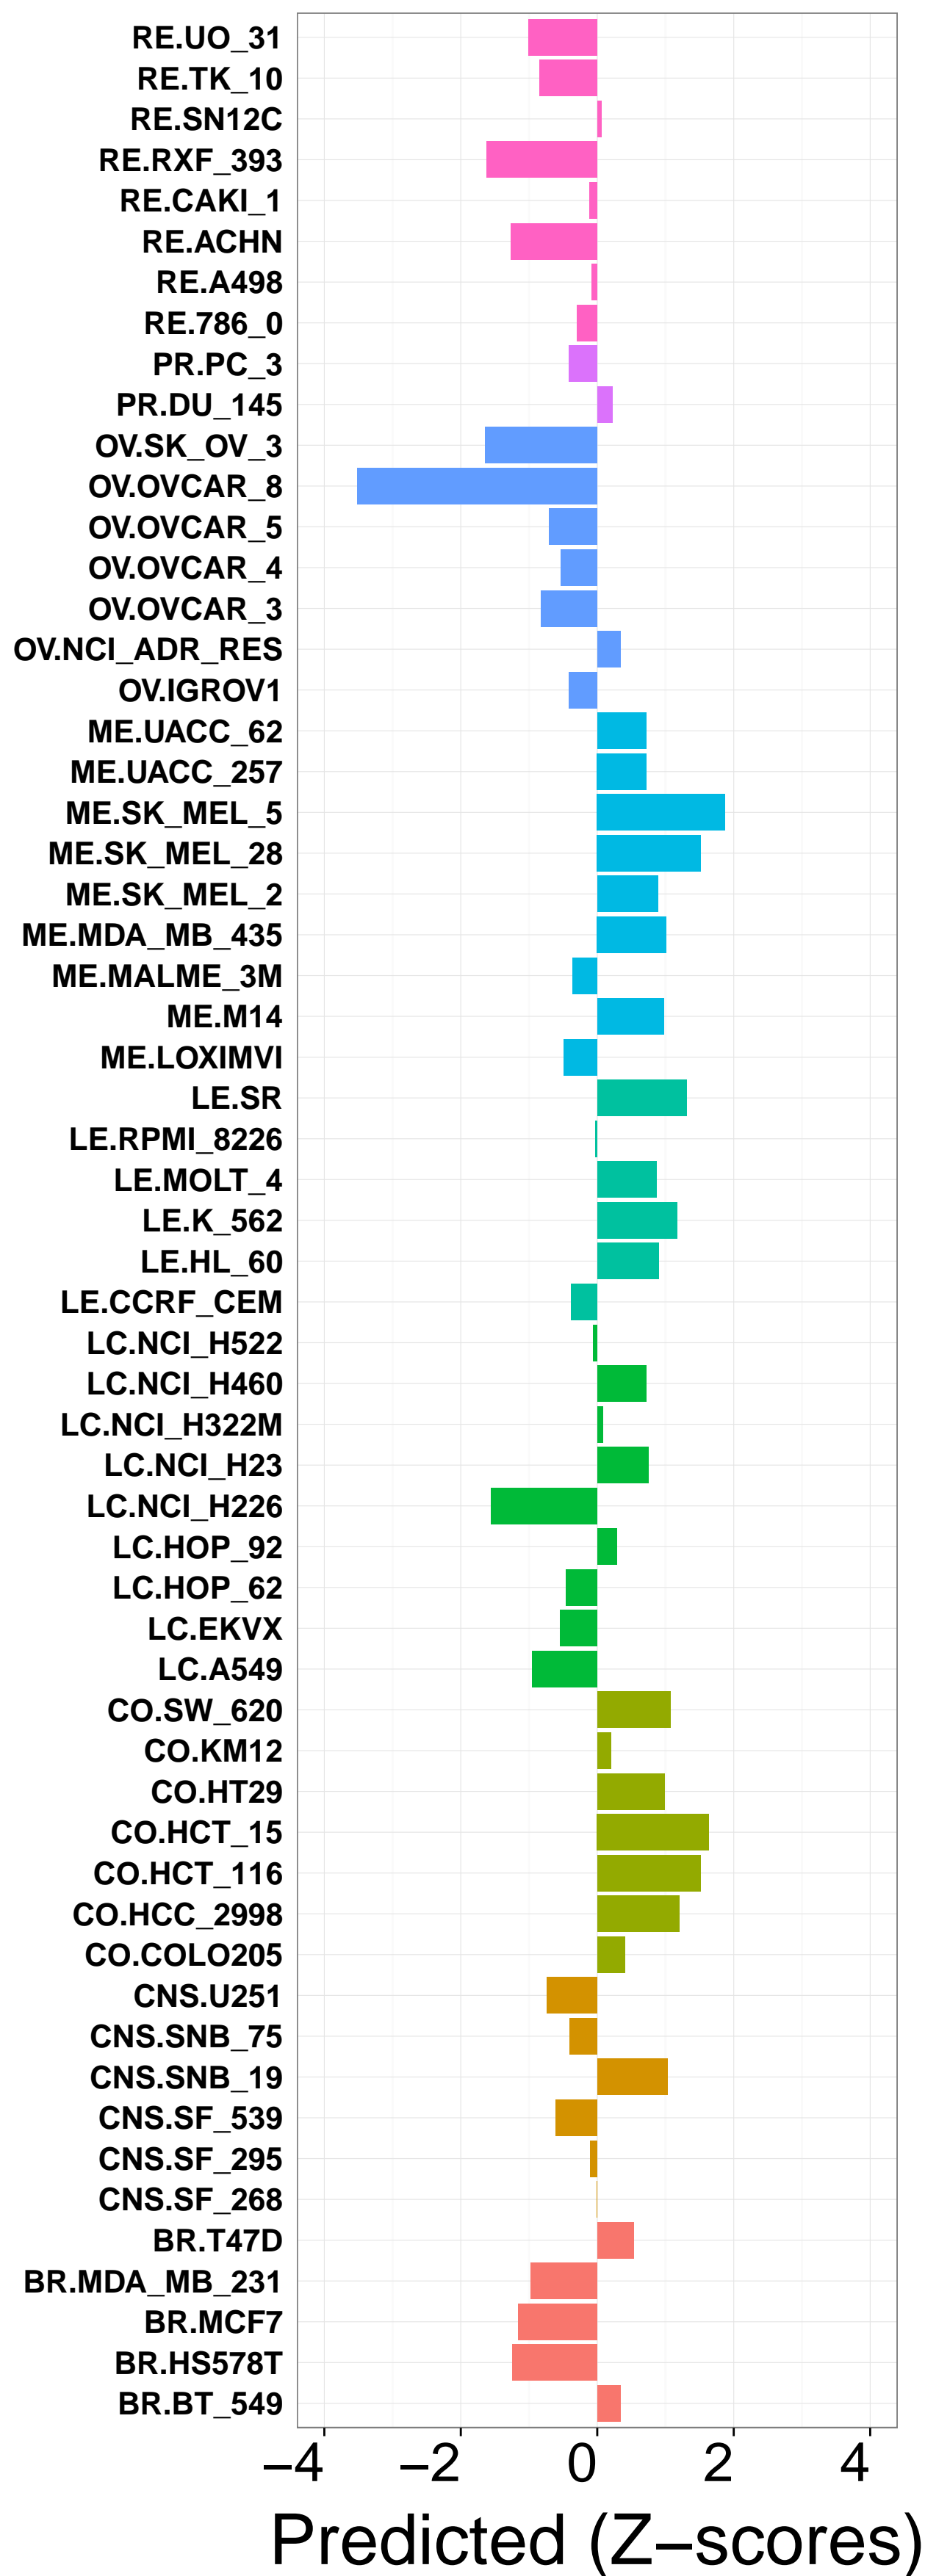

# NSC 34521, Dextromethorphan\_Hydrobromide (LOCO)

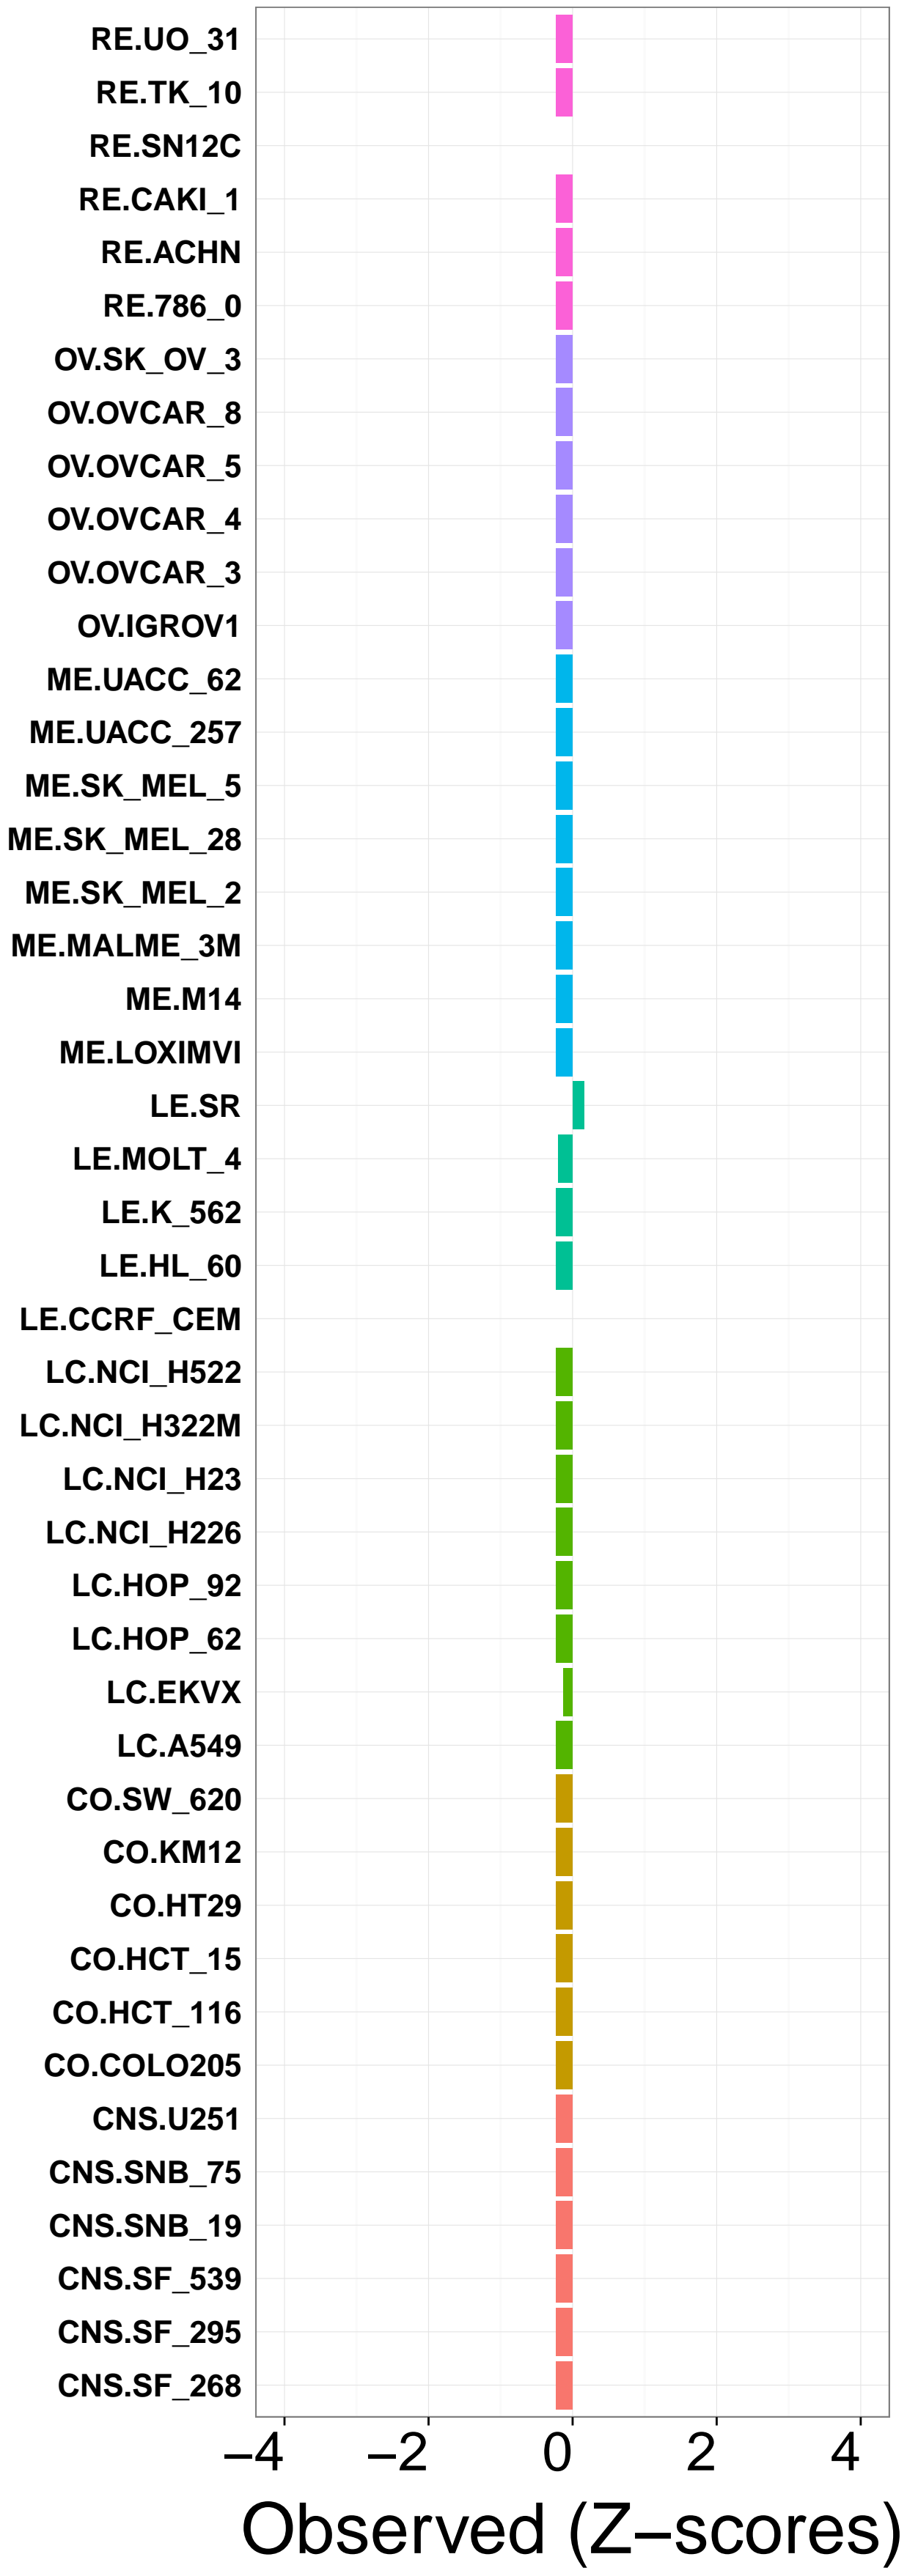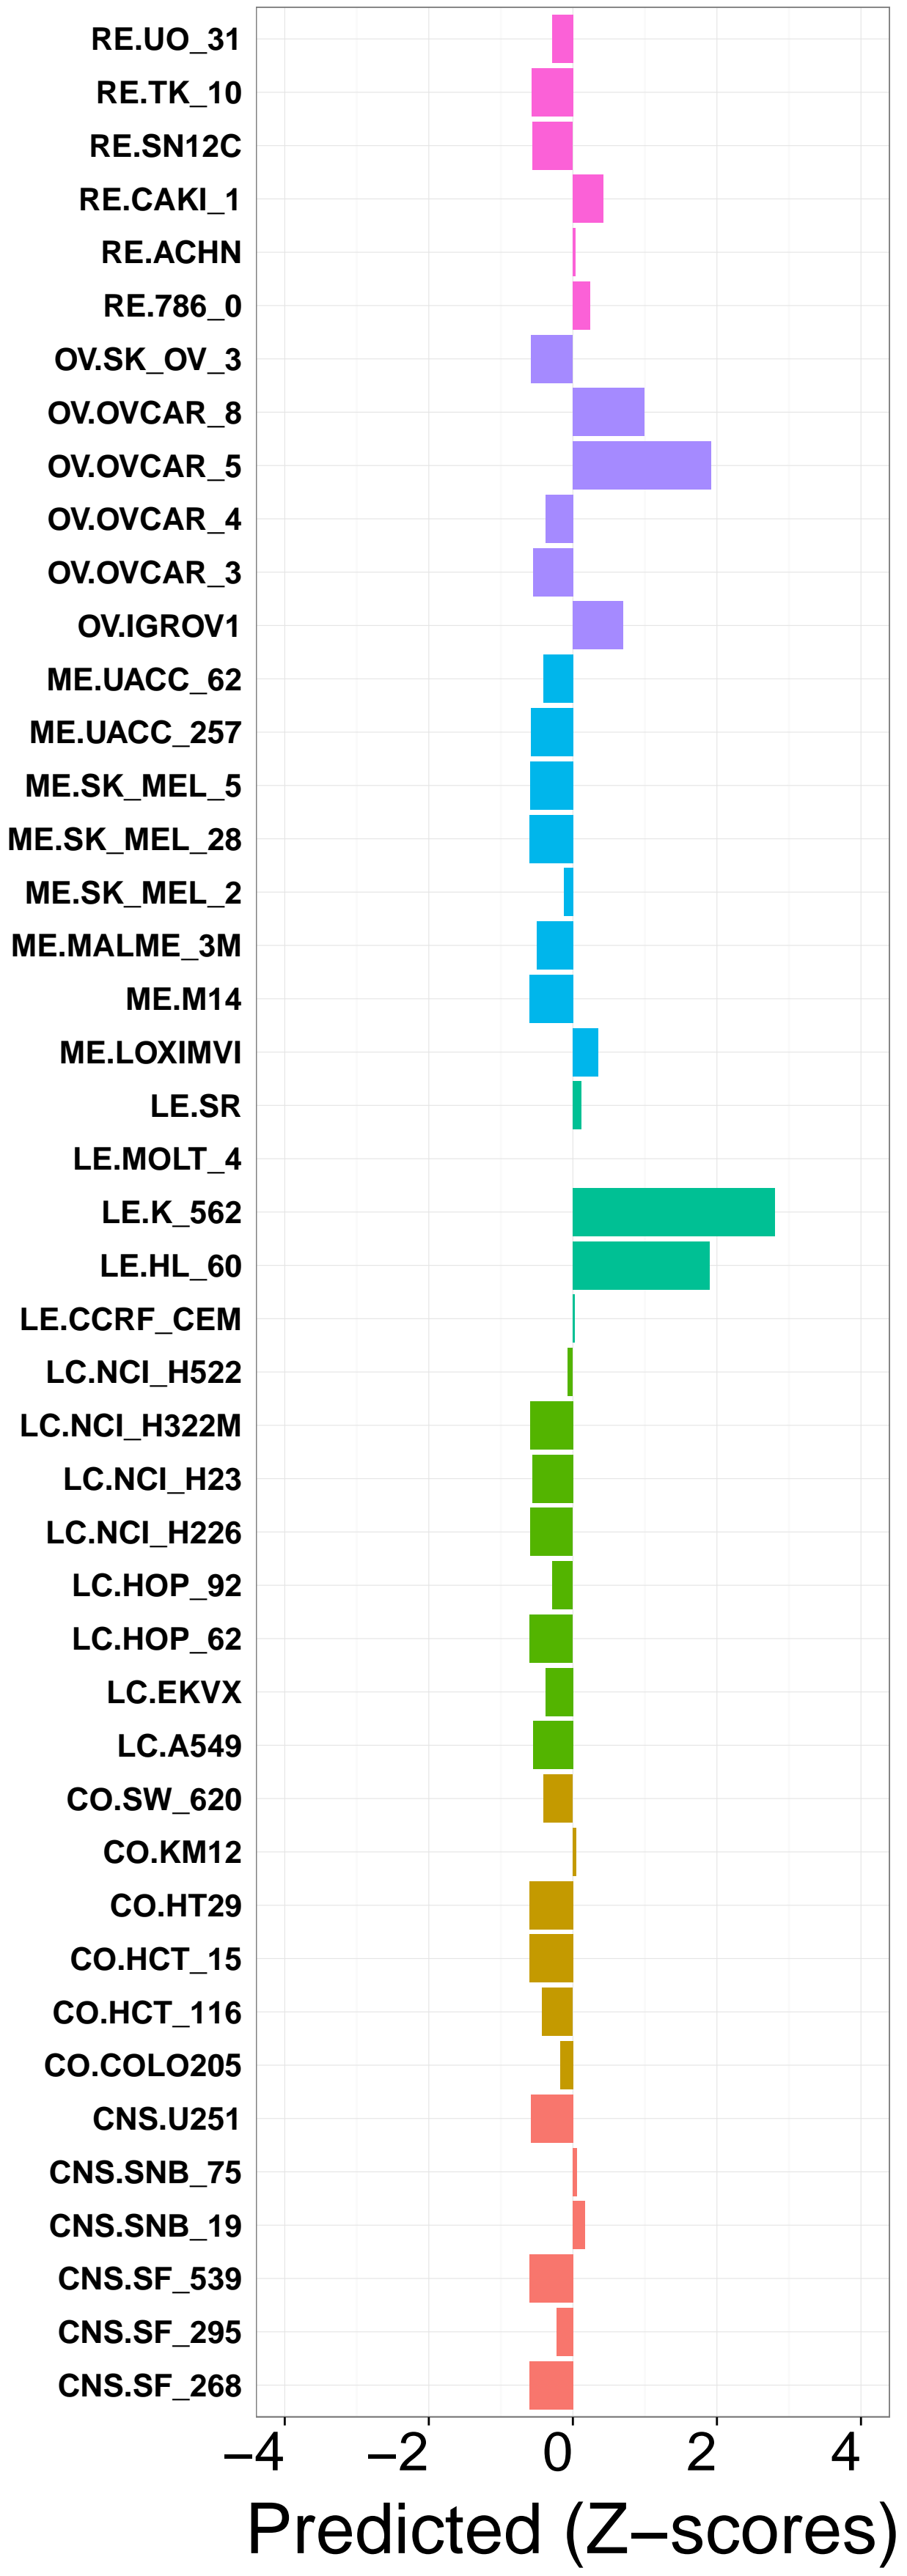

# NSC 354258, 8-Chloro-Adenosine (LOCO)

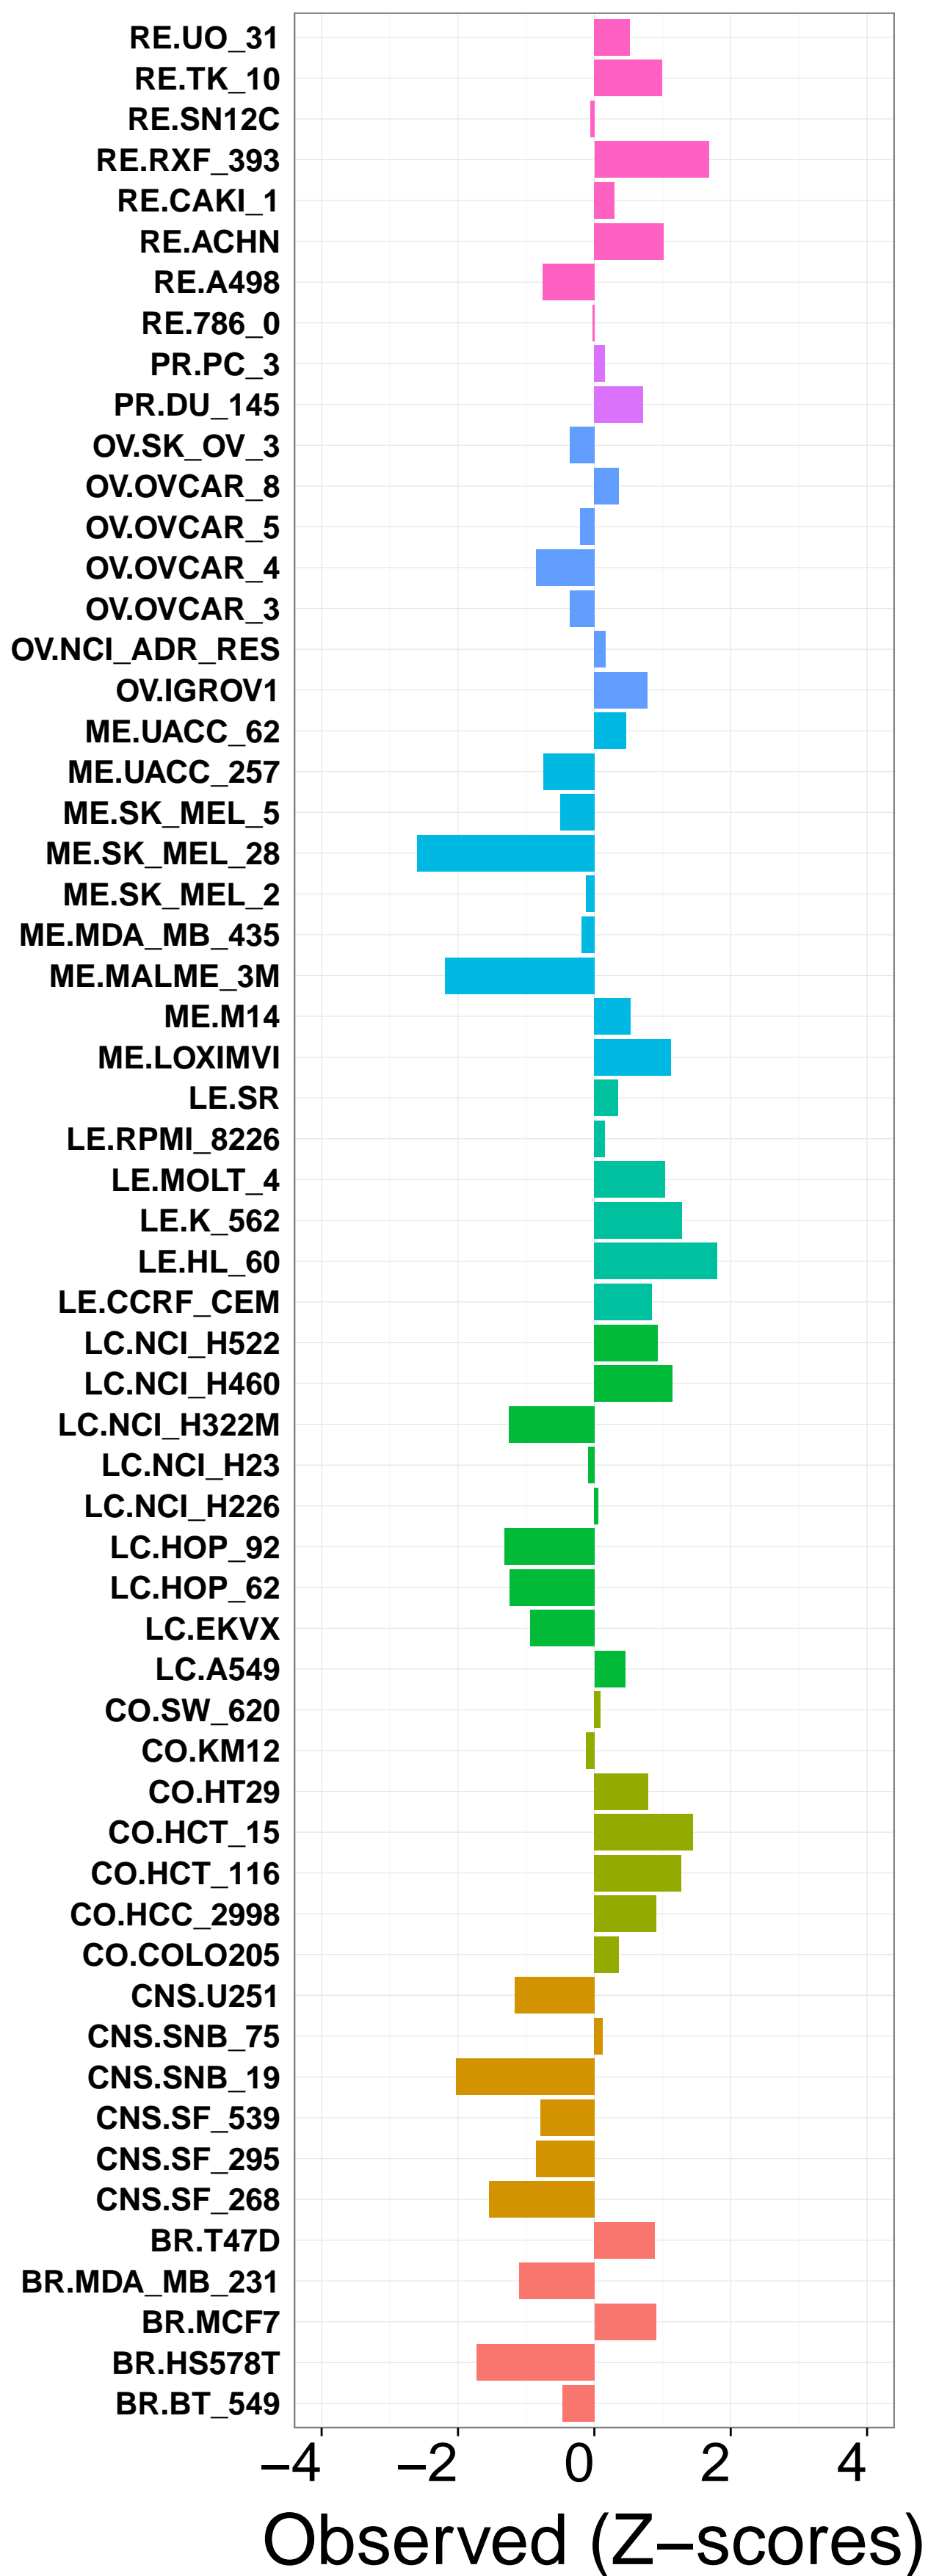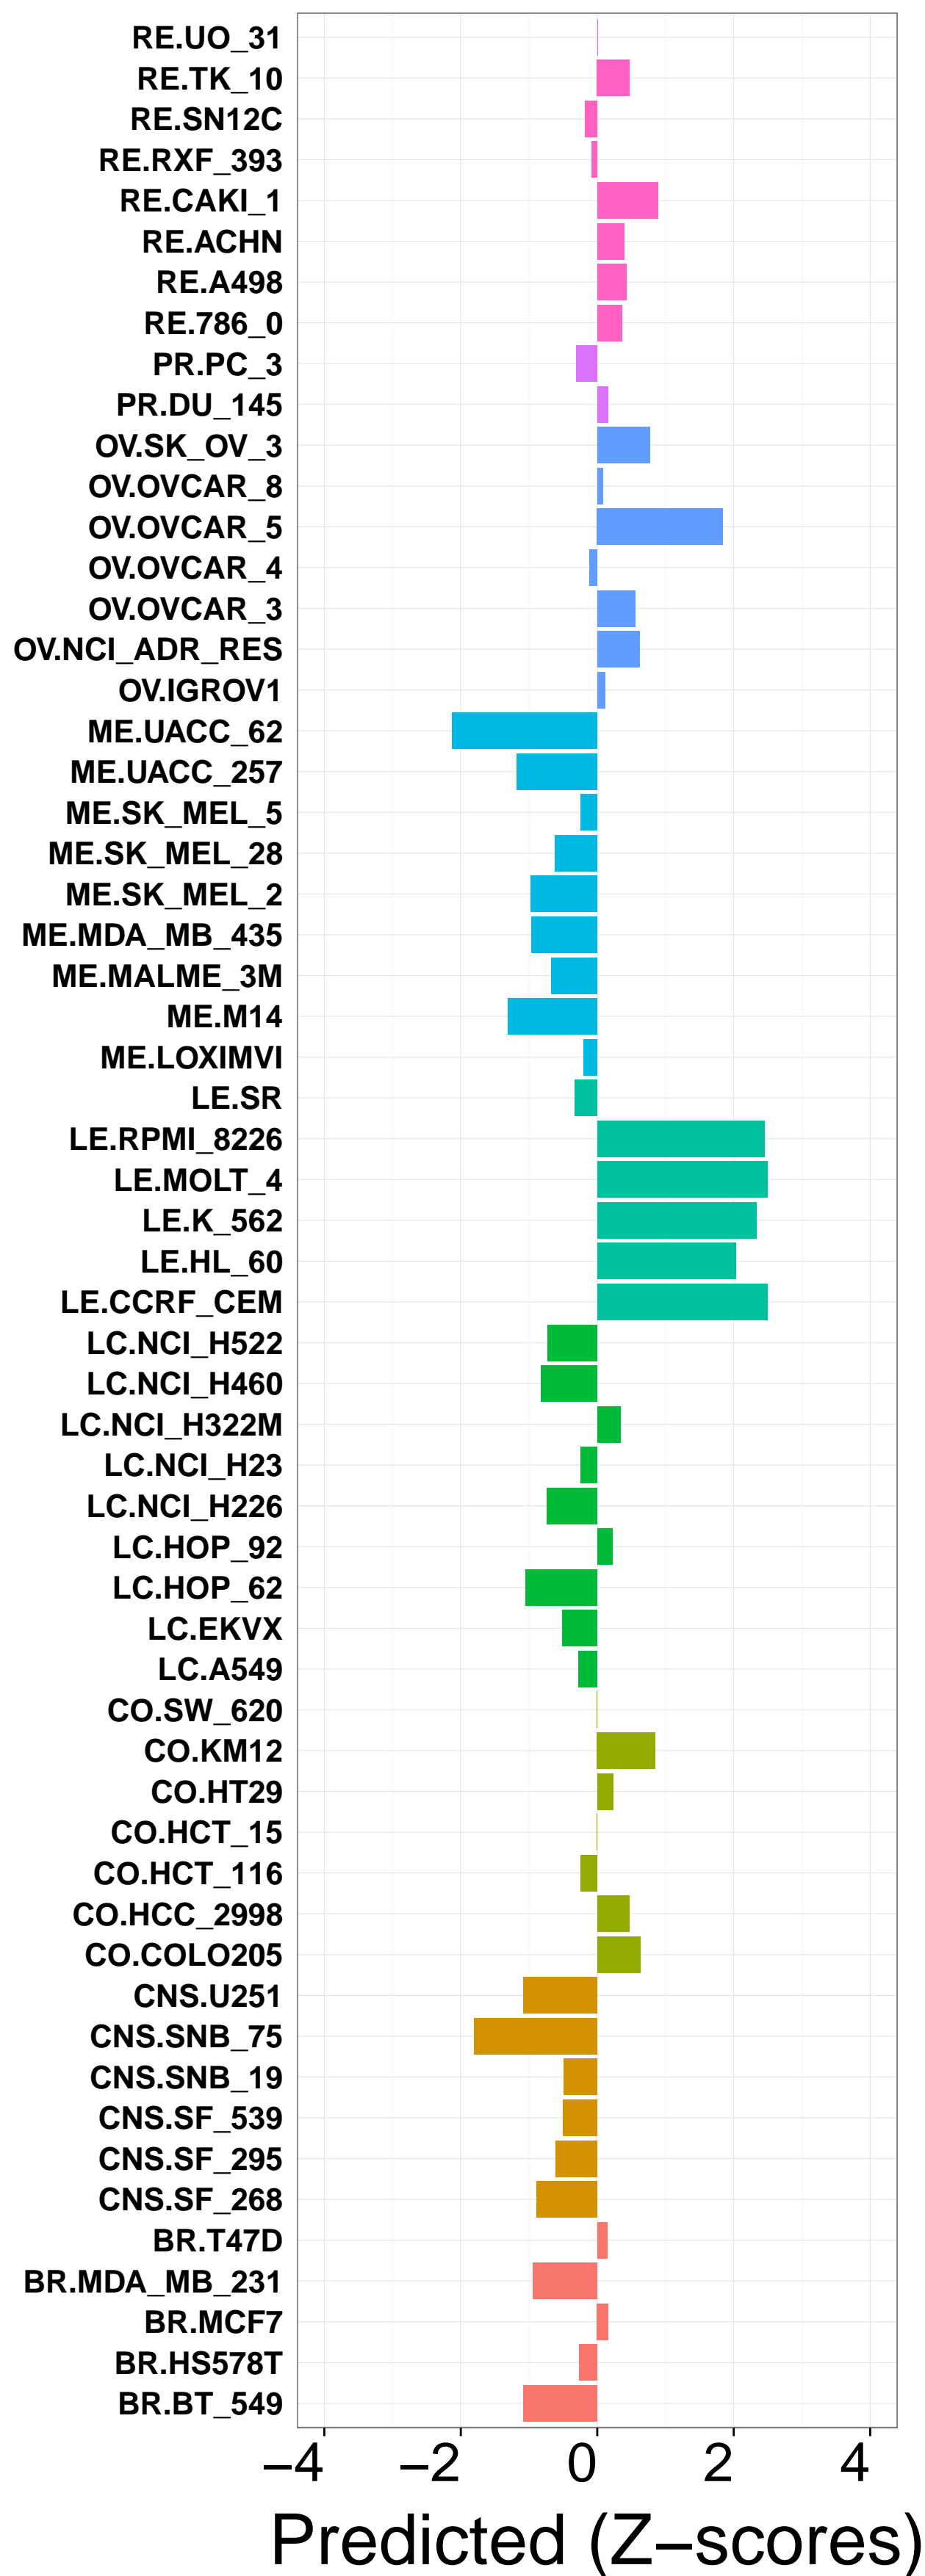

# NSC 354462, Hypothemycin (LOCO)

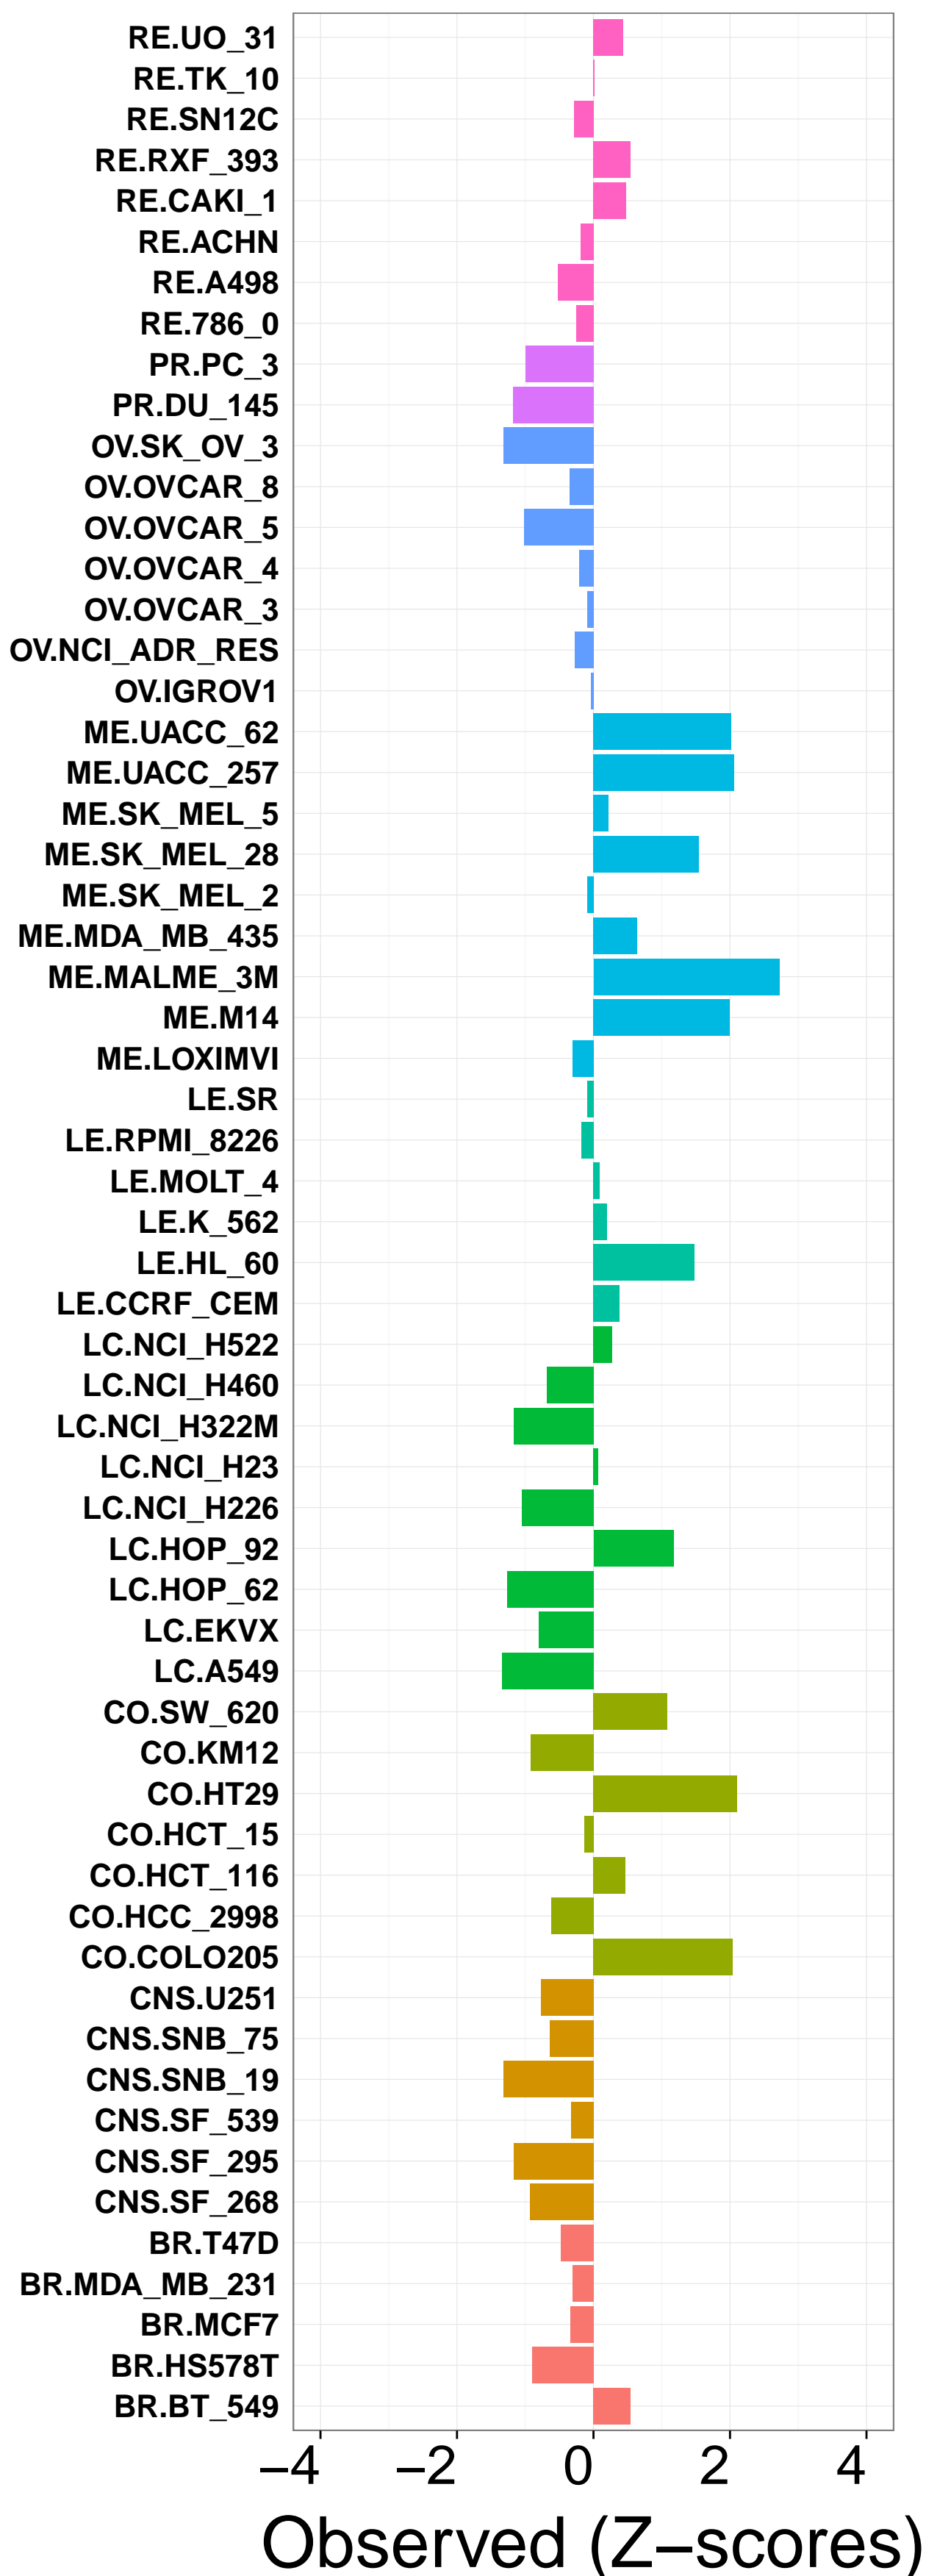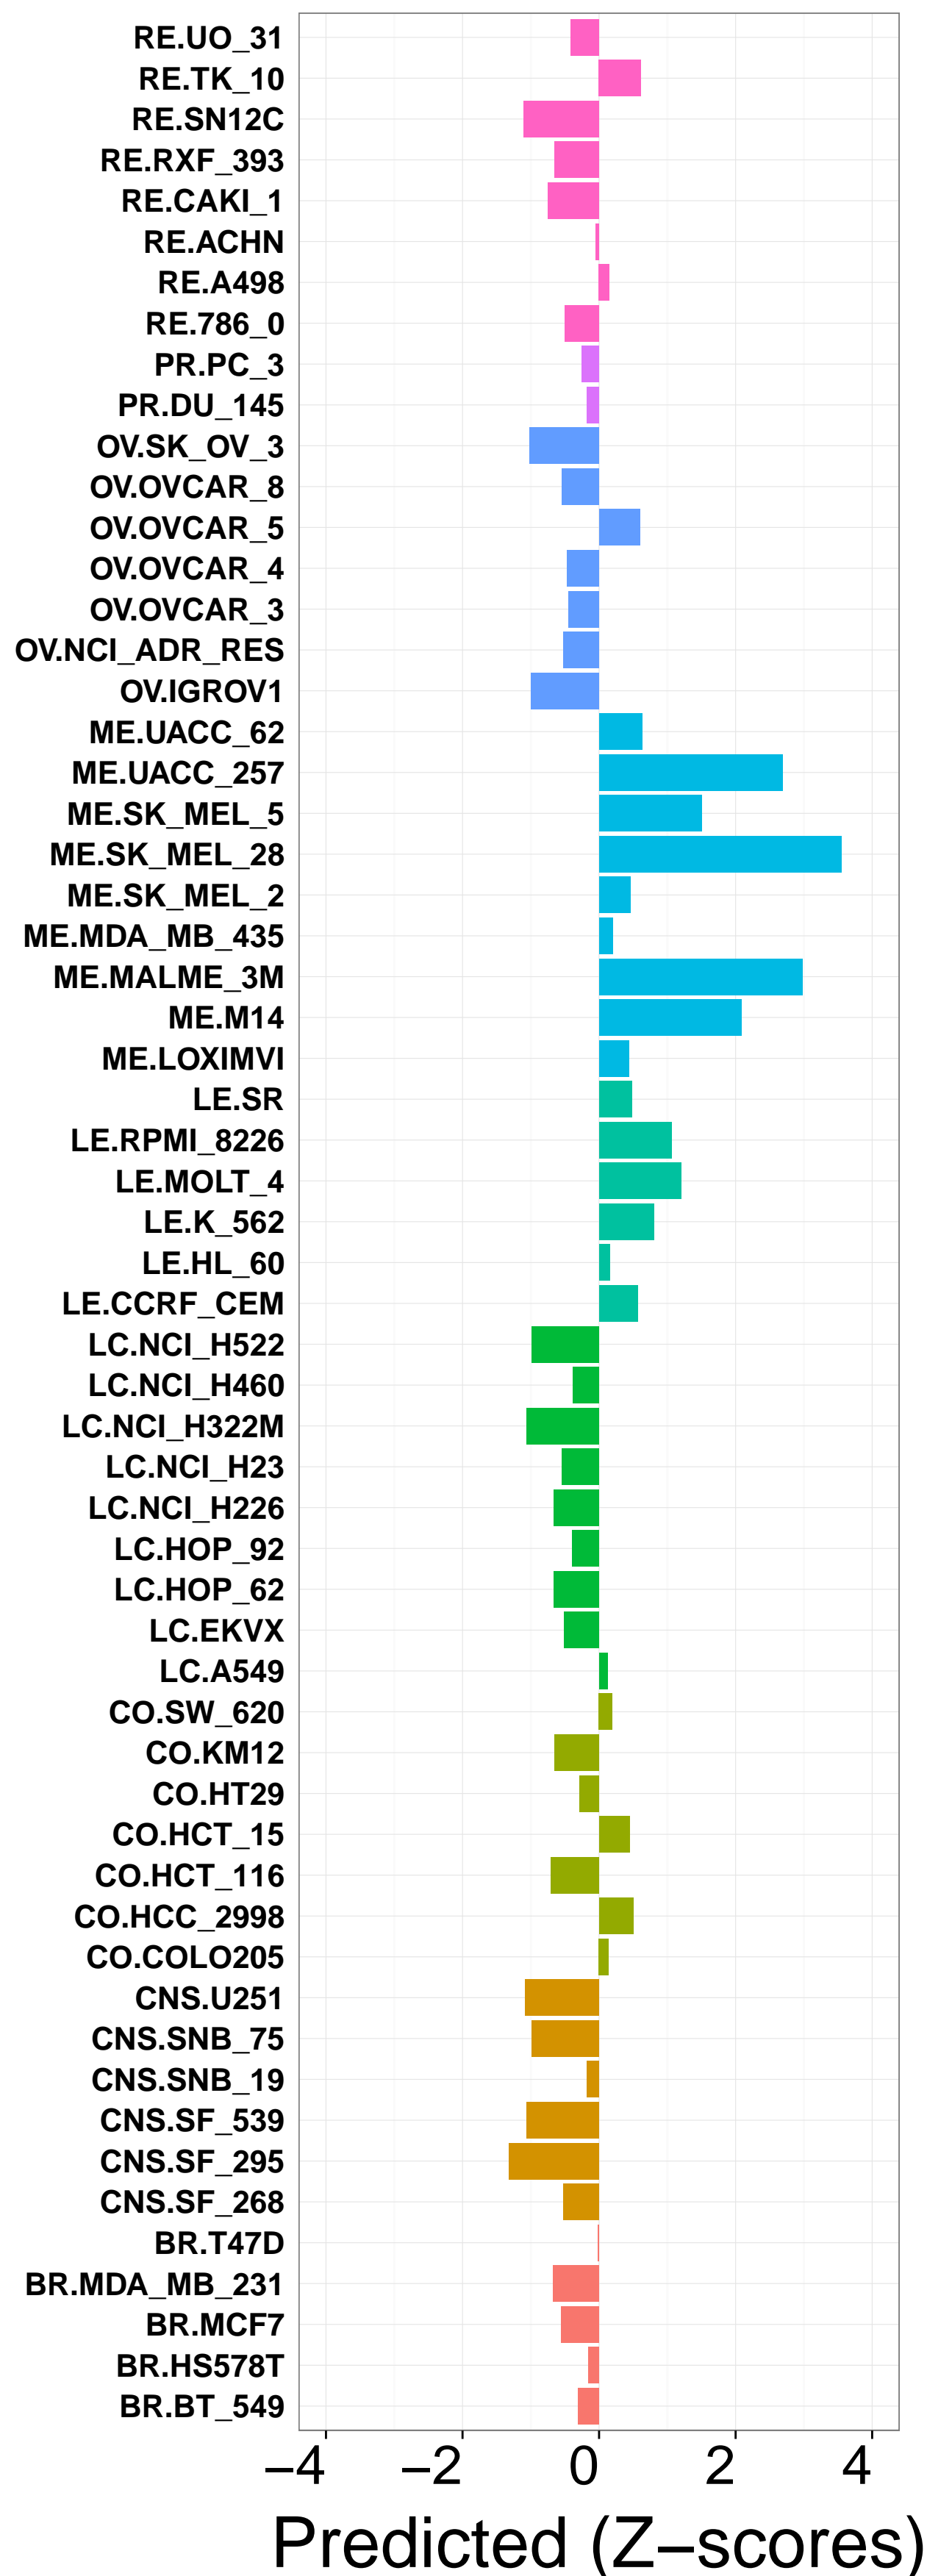



# NSC 376128, Dolastatin\_10 (LOCO)

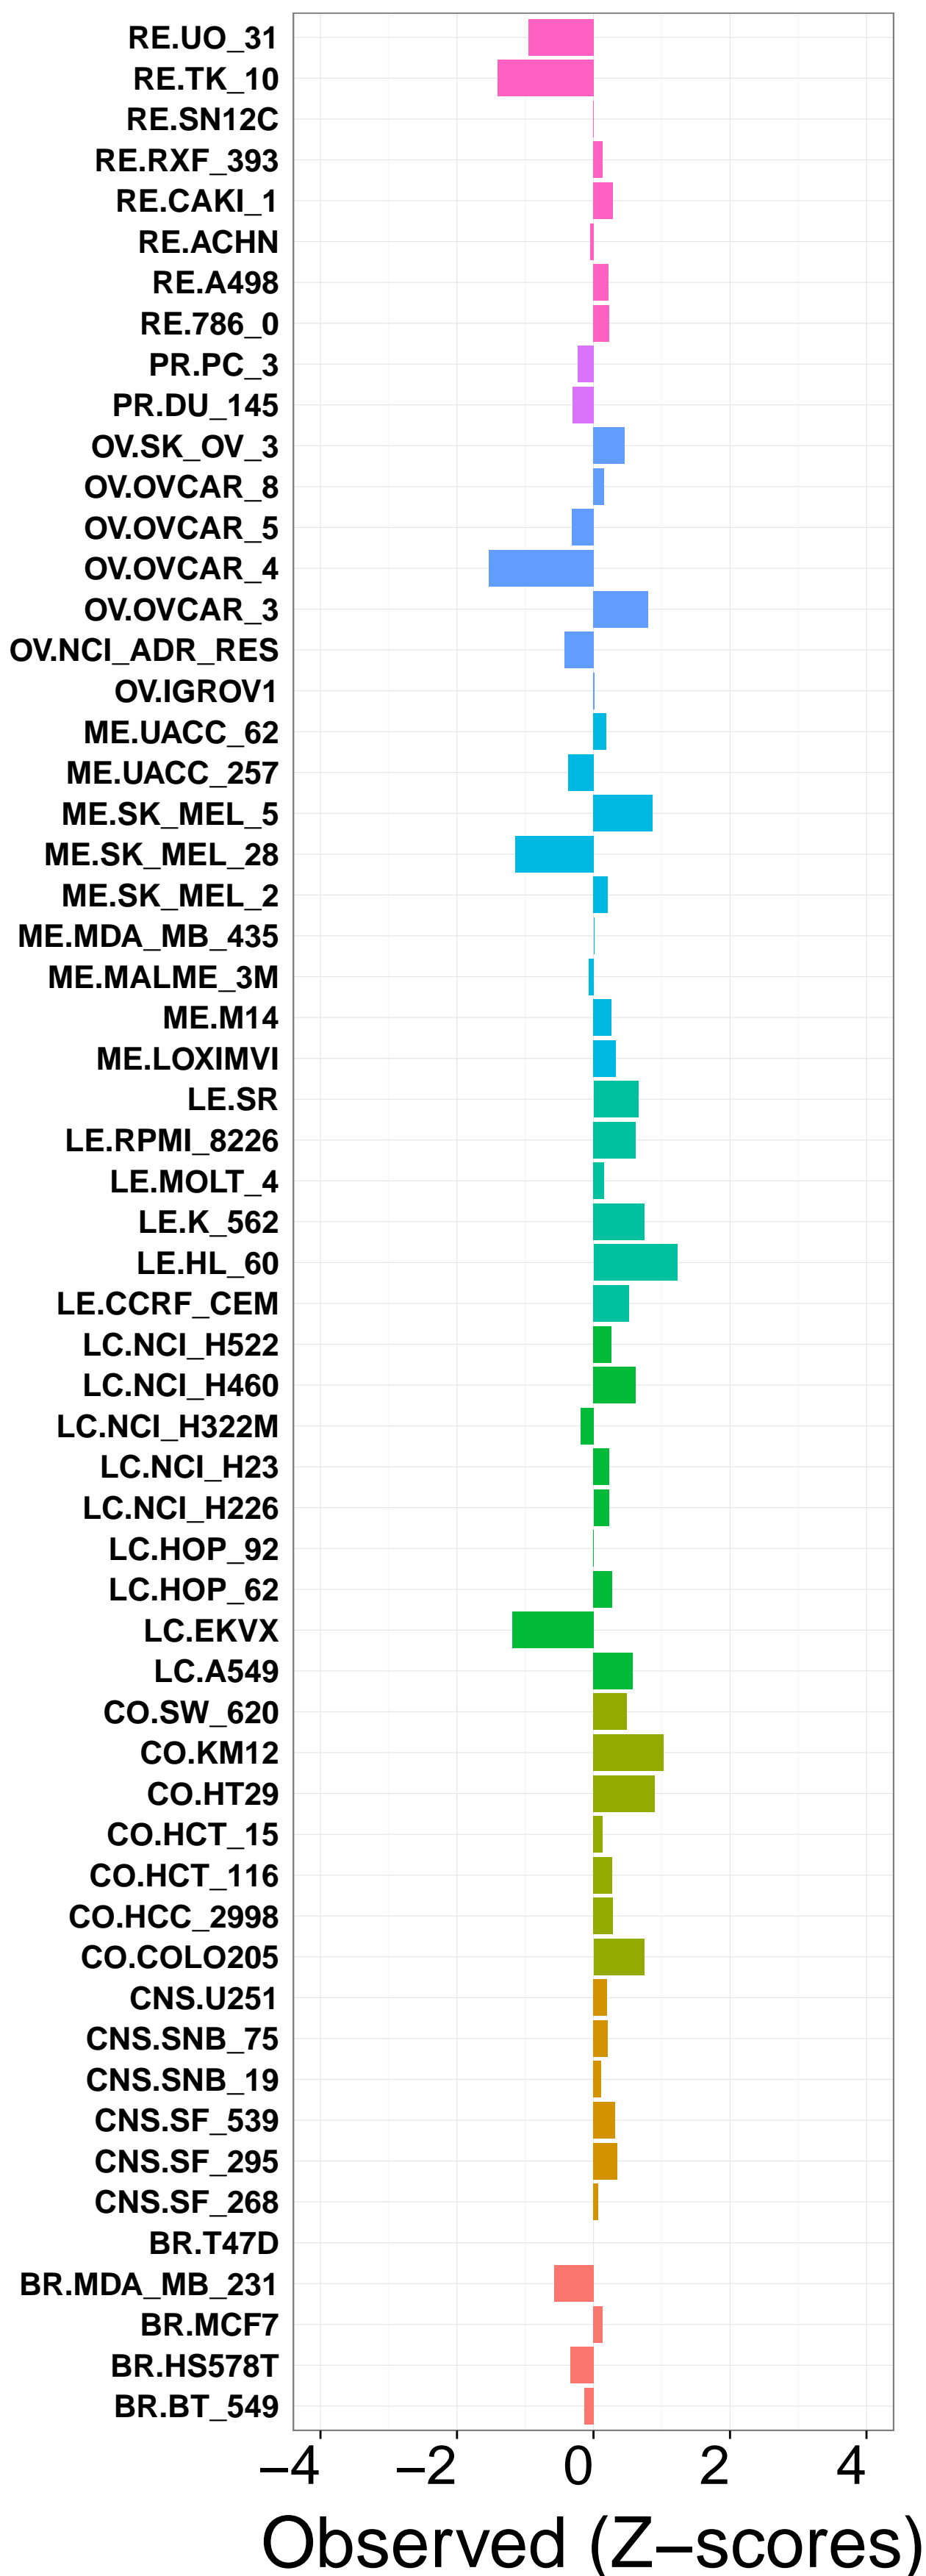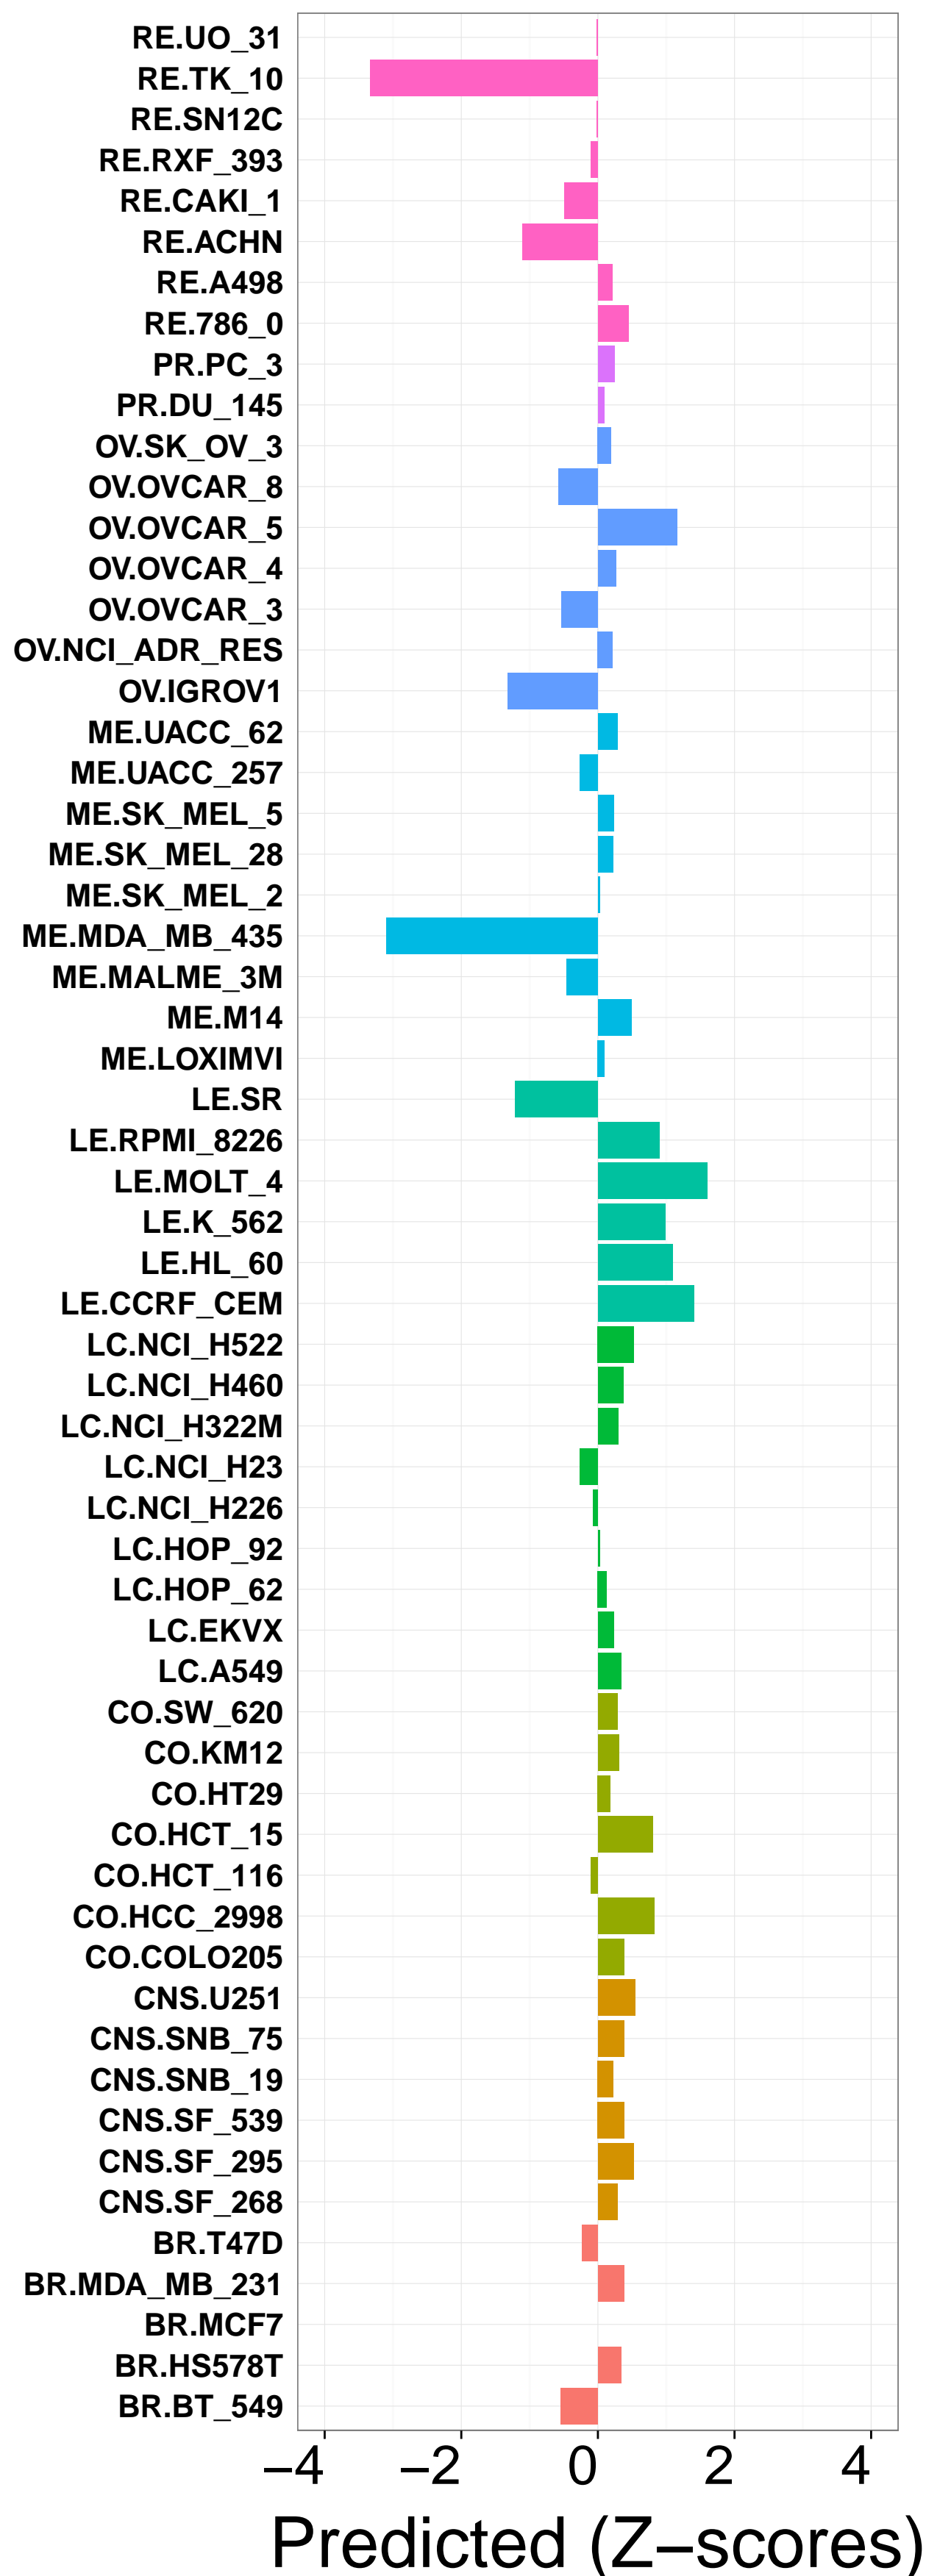

# NSC 606869, (LOCO)

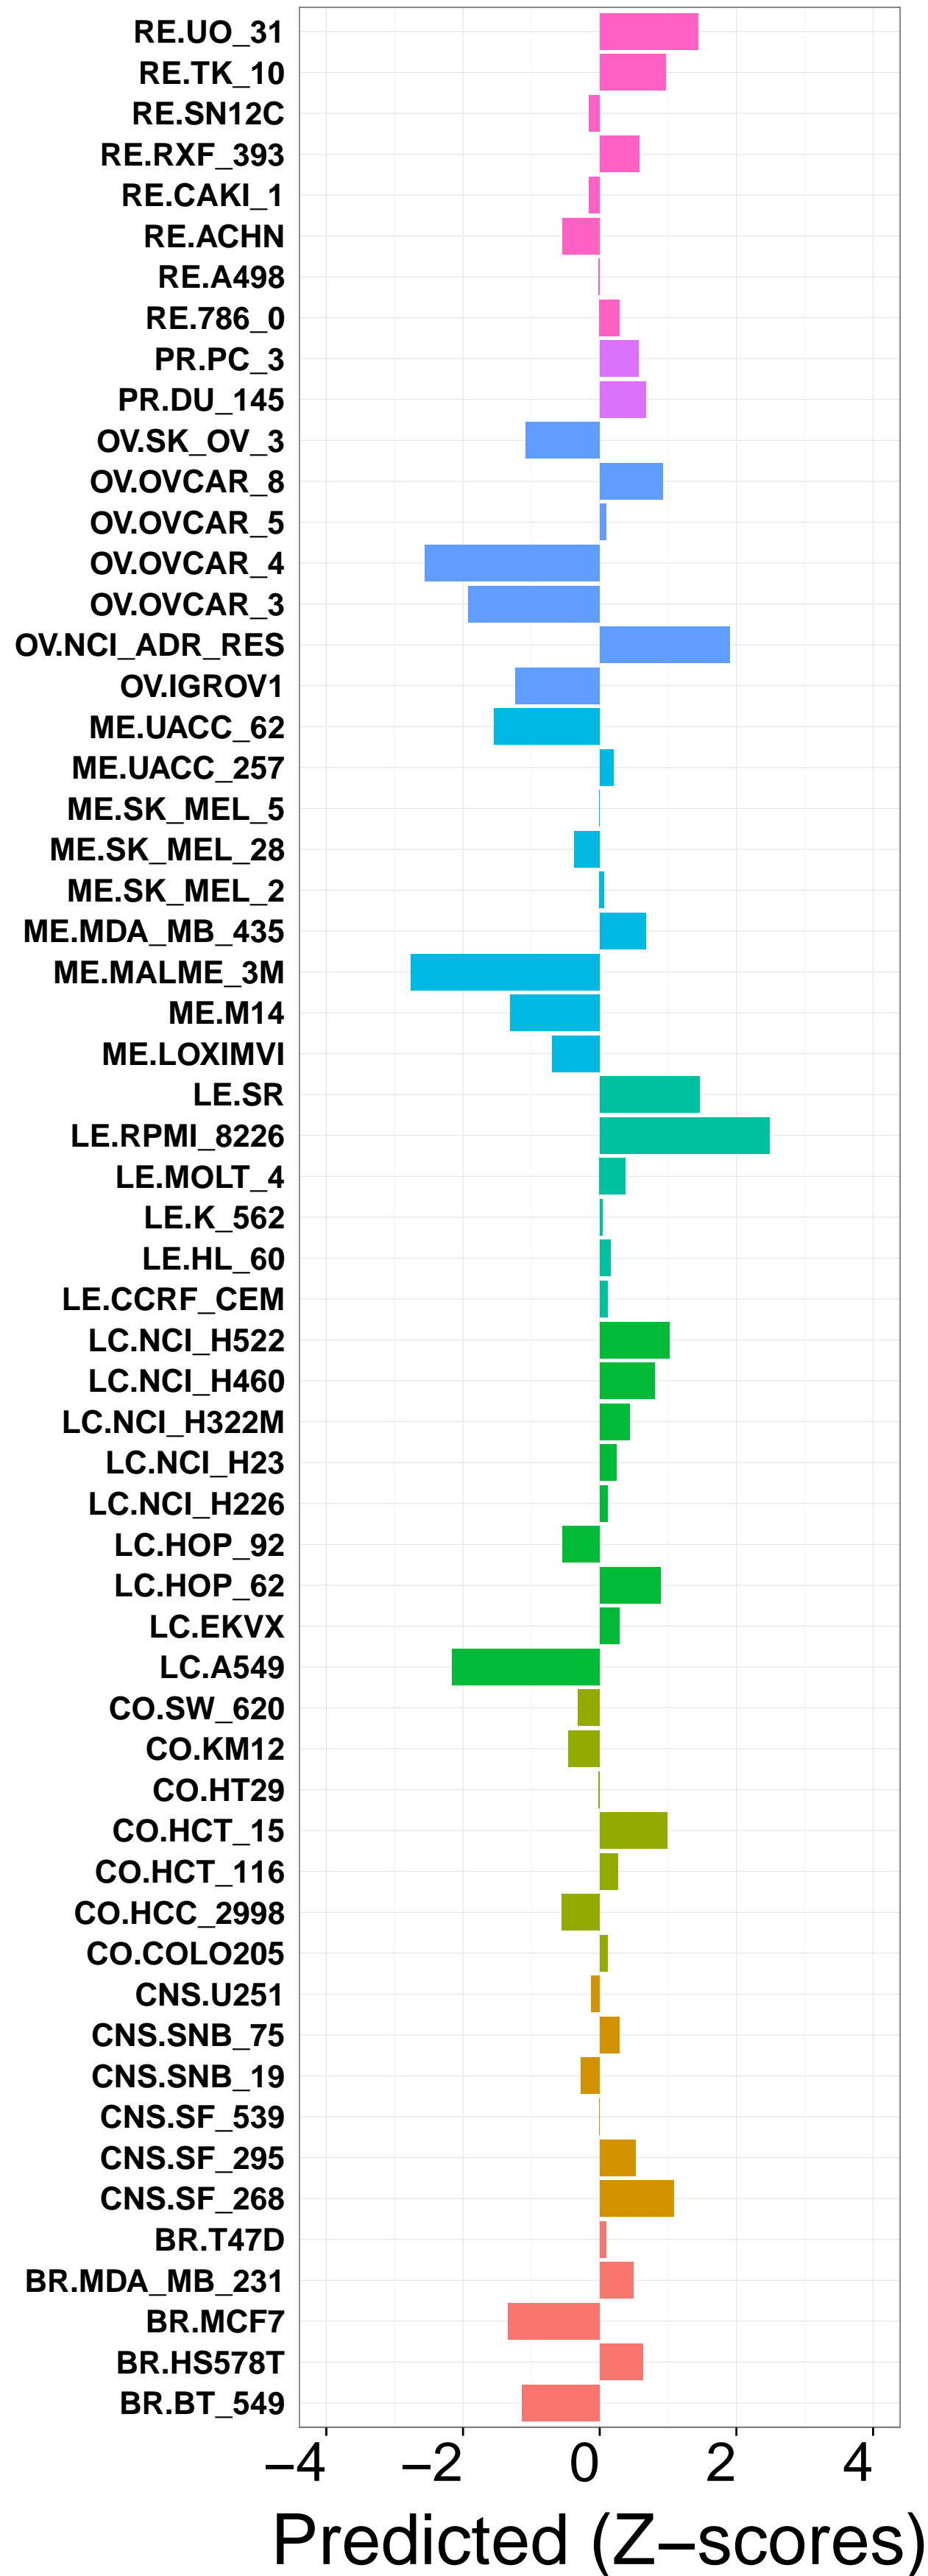

# NSC 609699, Topotecan\_Hydrochloride (LOCO)

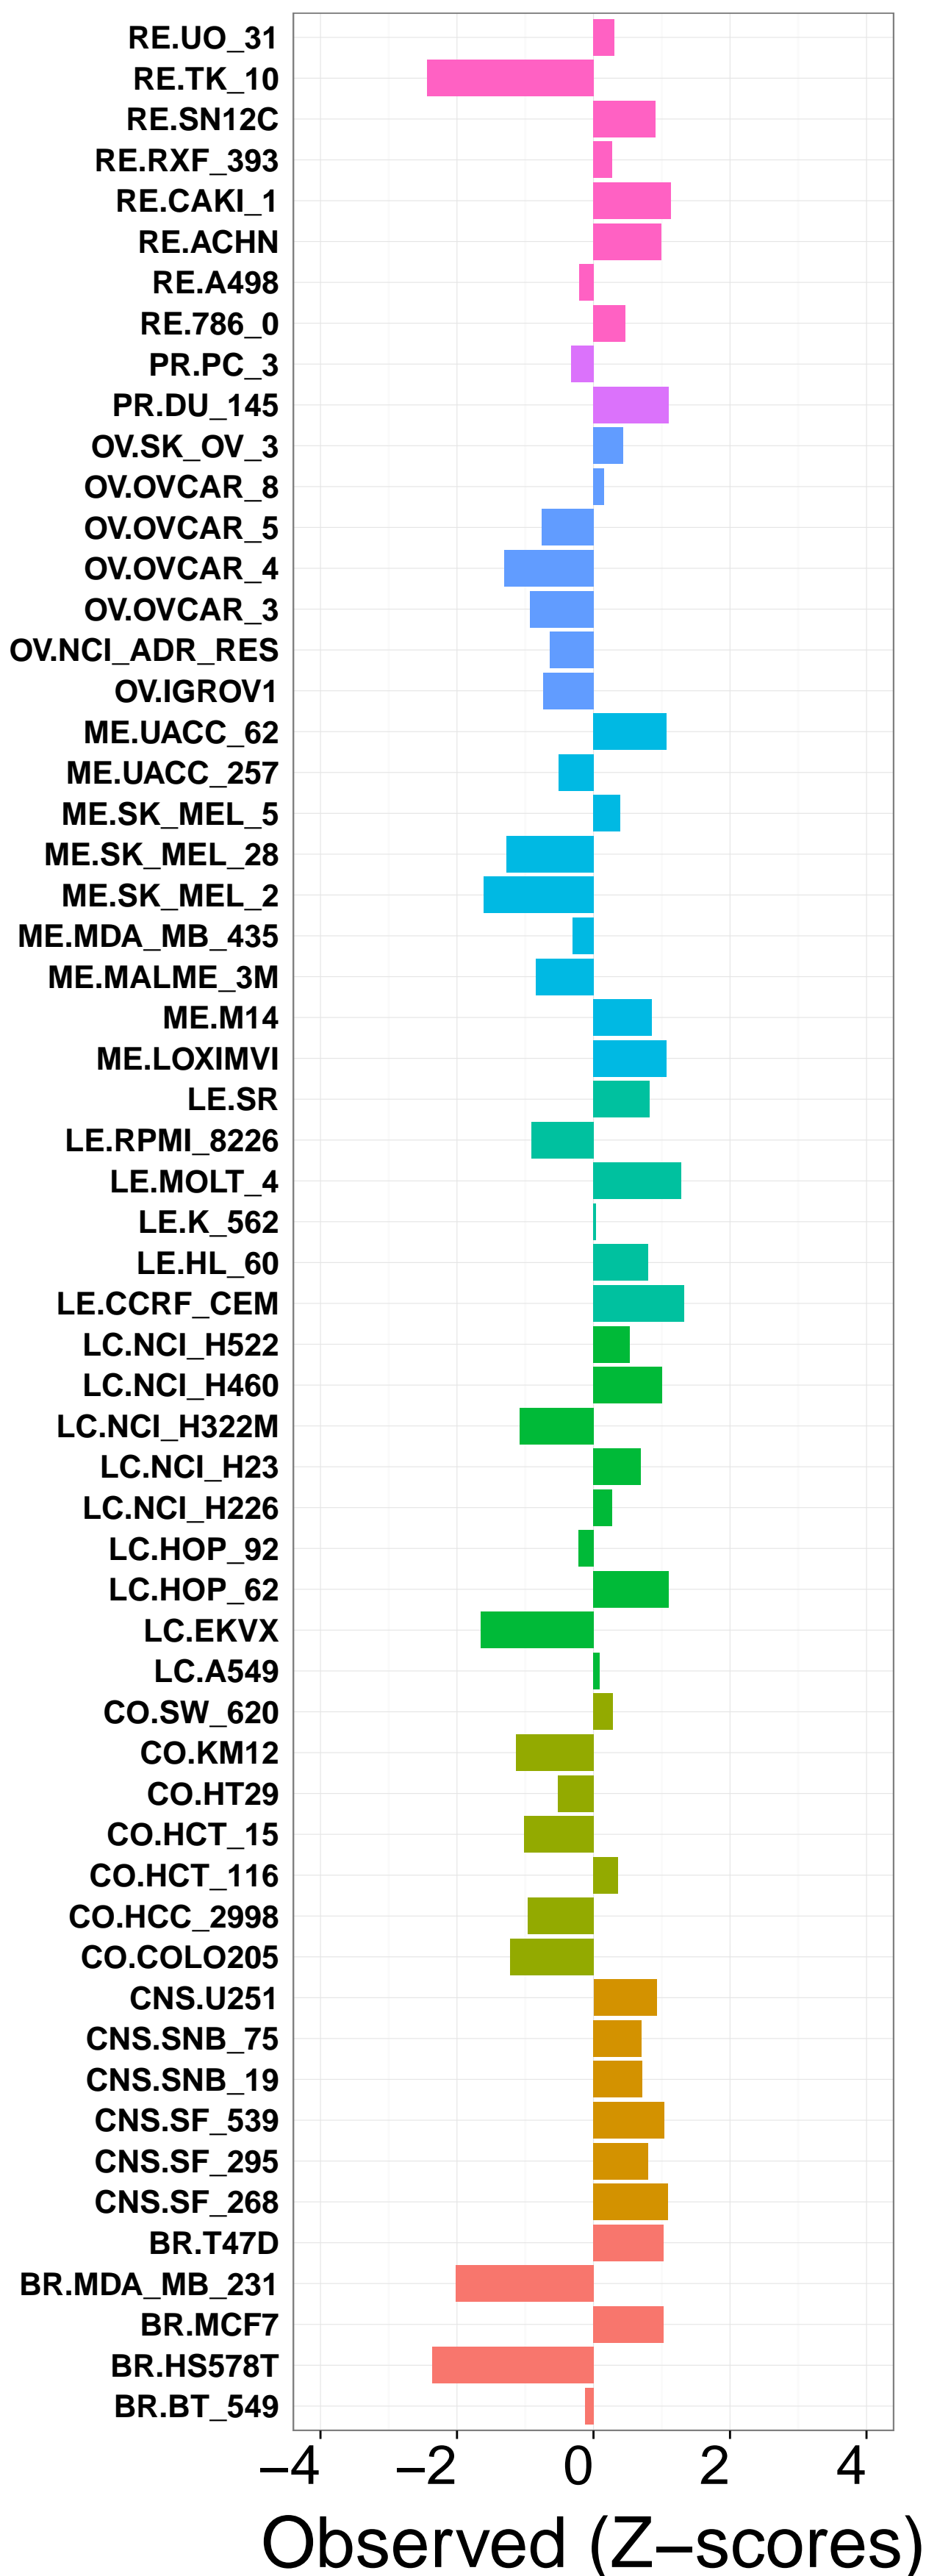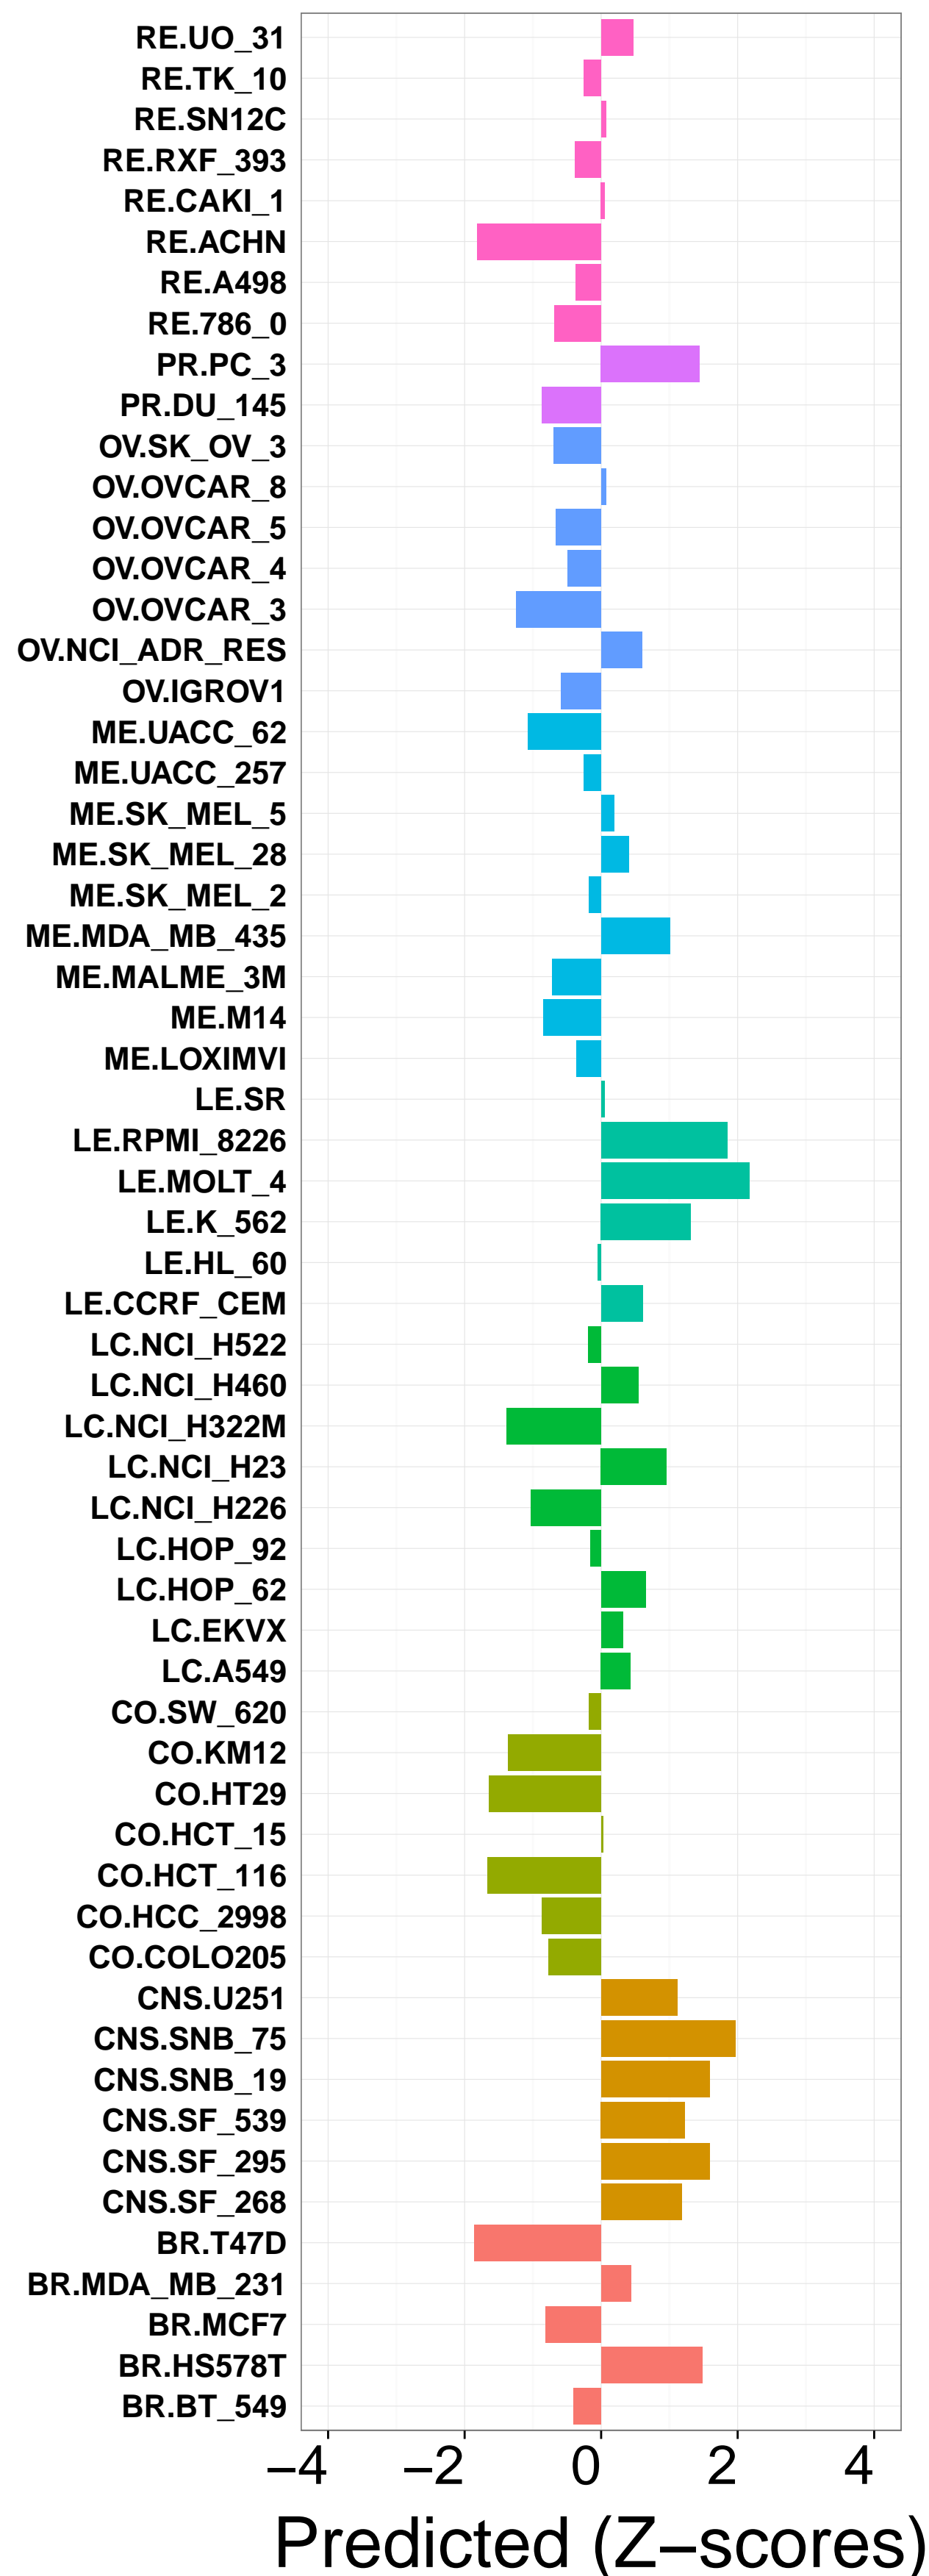

# NSC 613327, (LOCO)

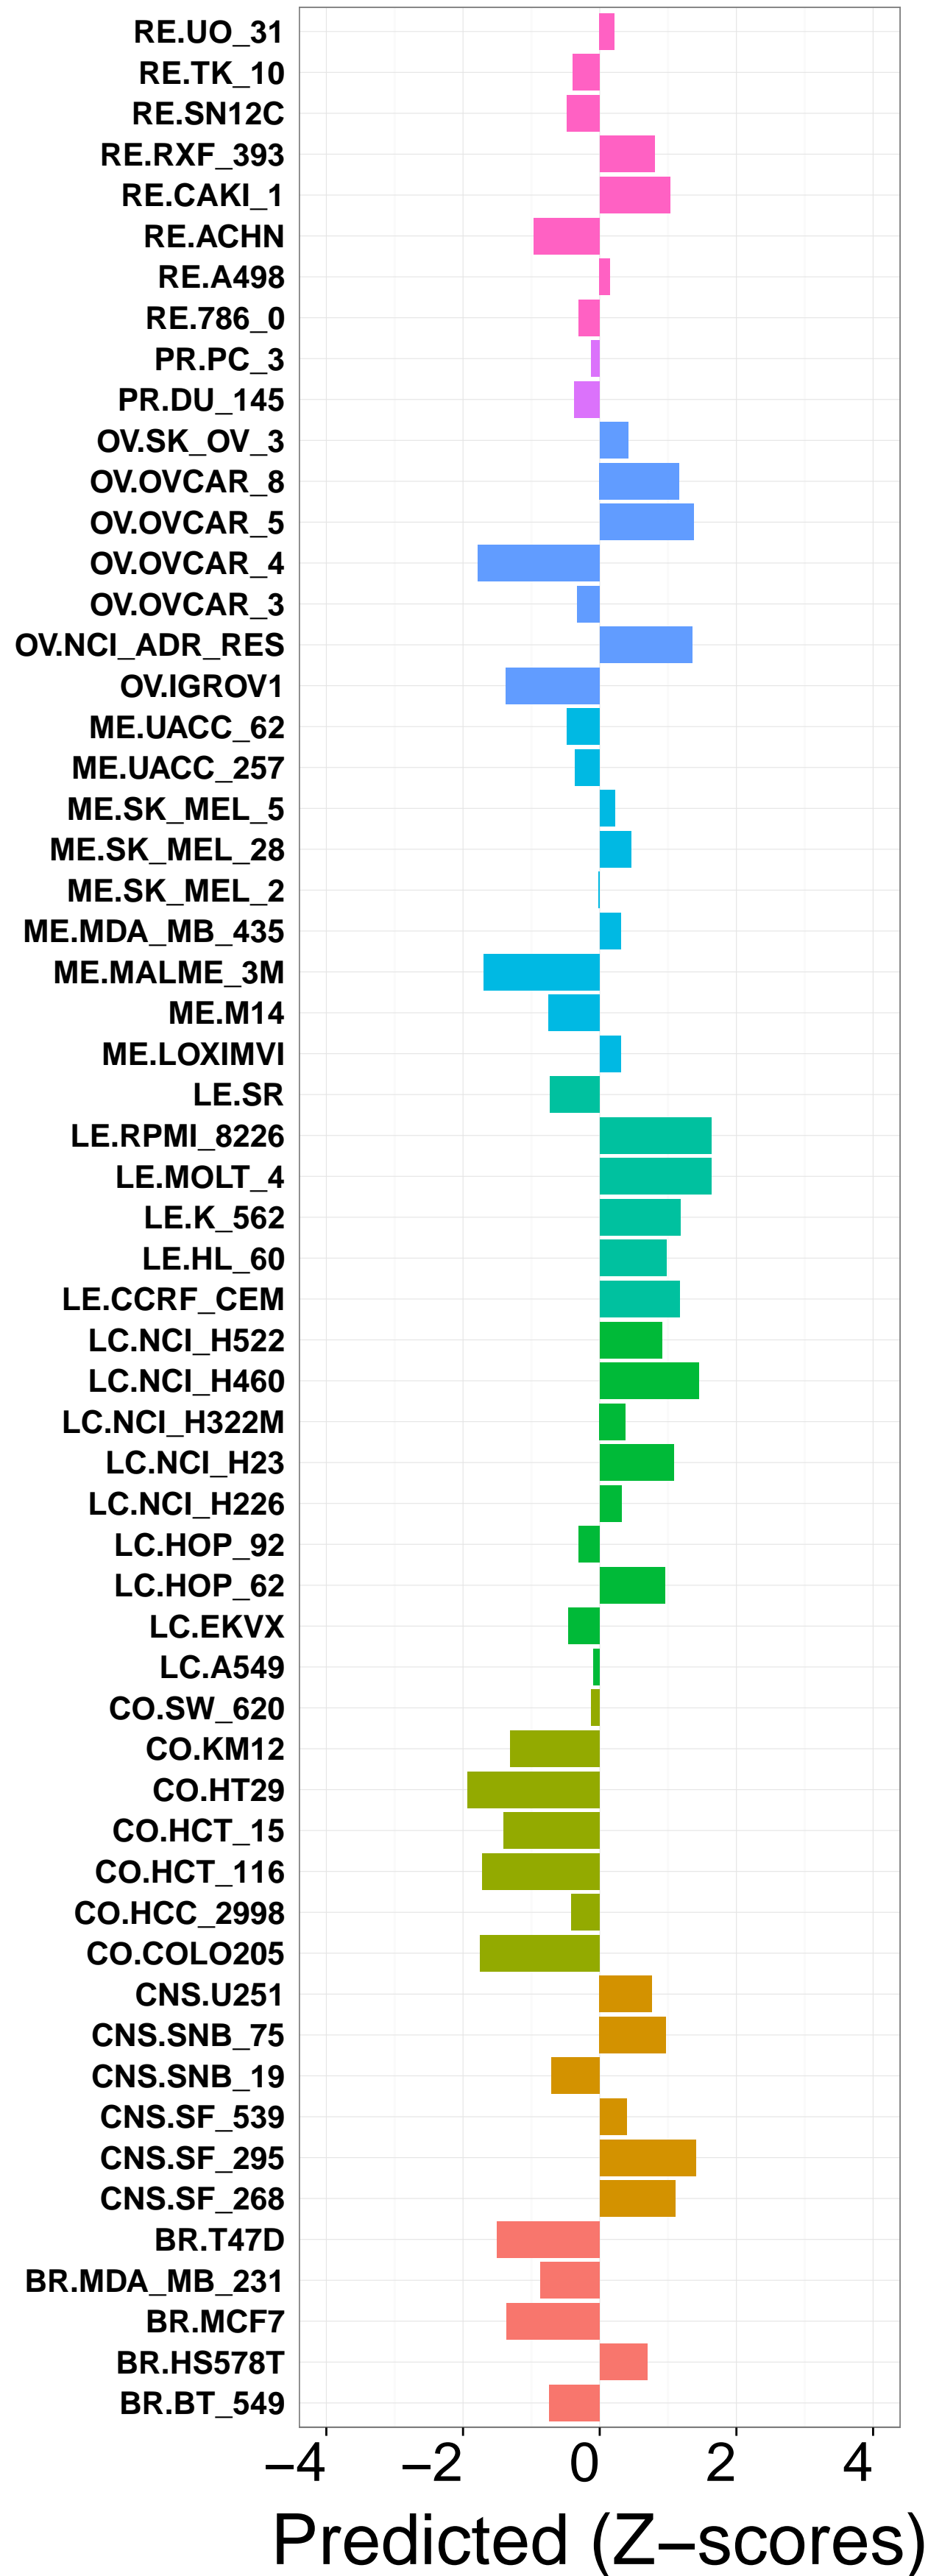

# NSC 628503, Docetaxel (LOCO)

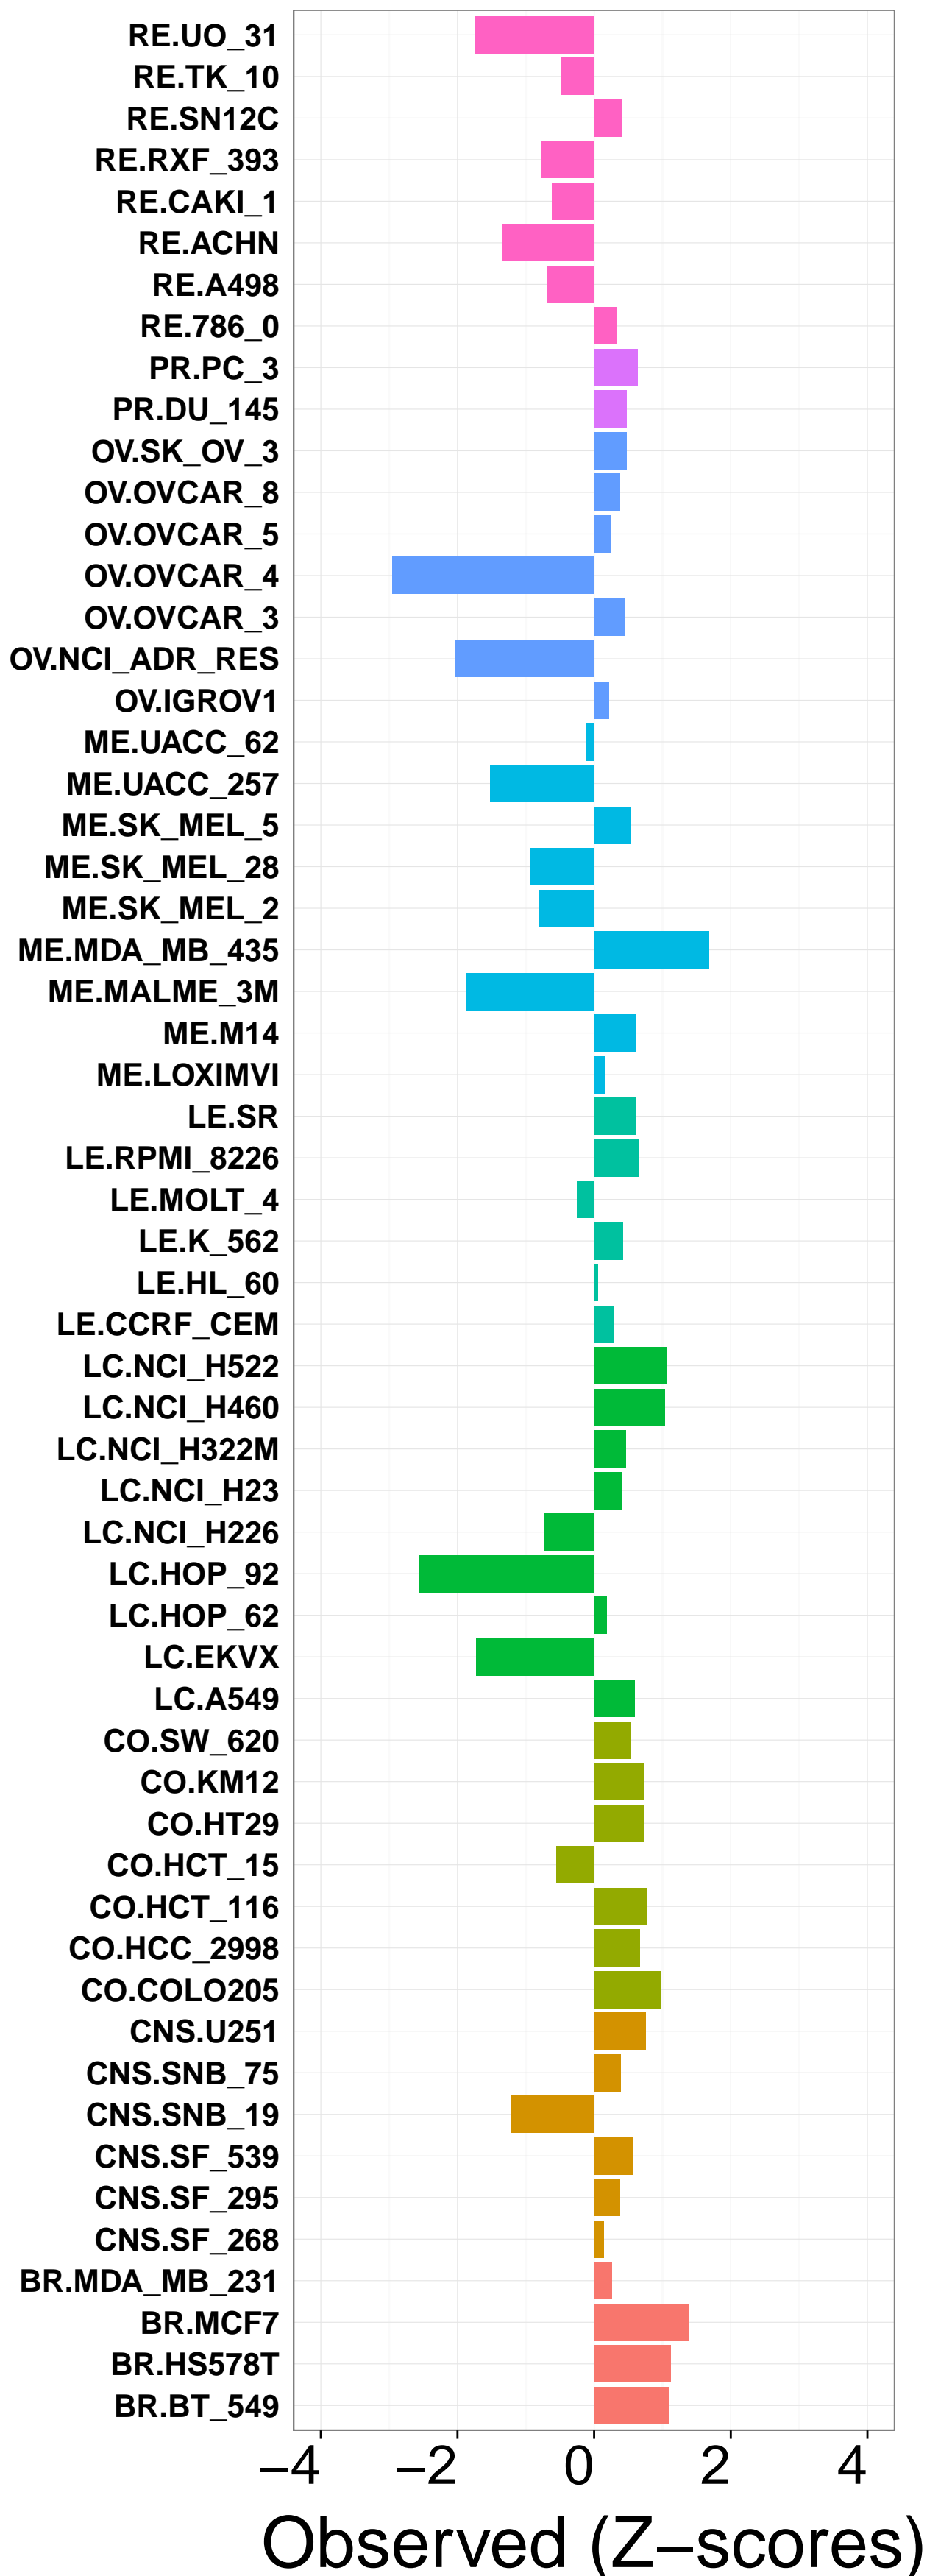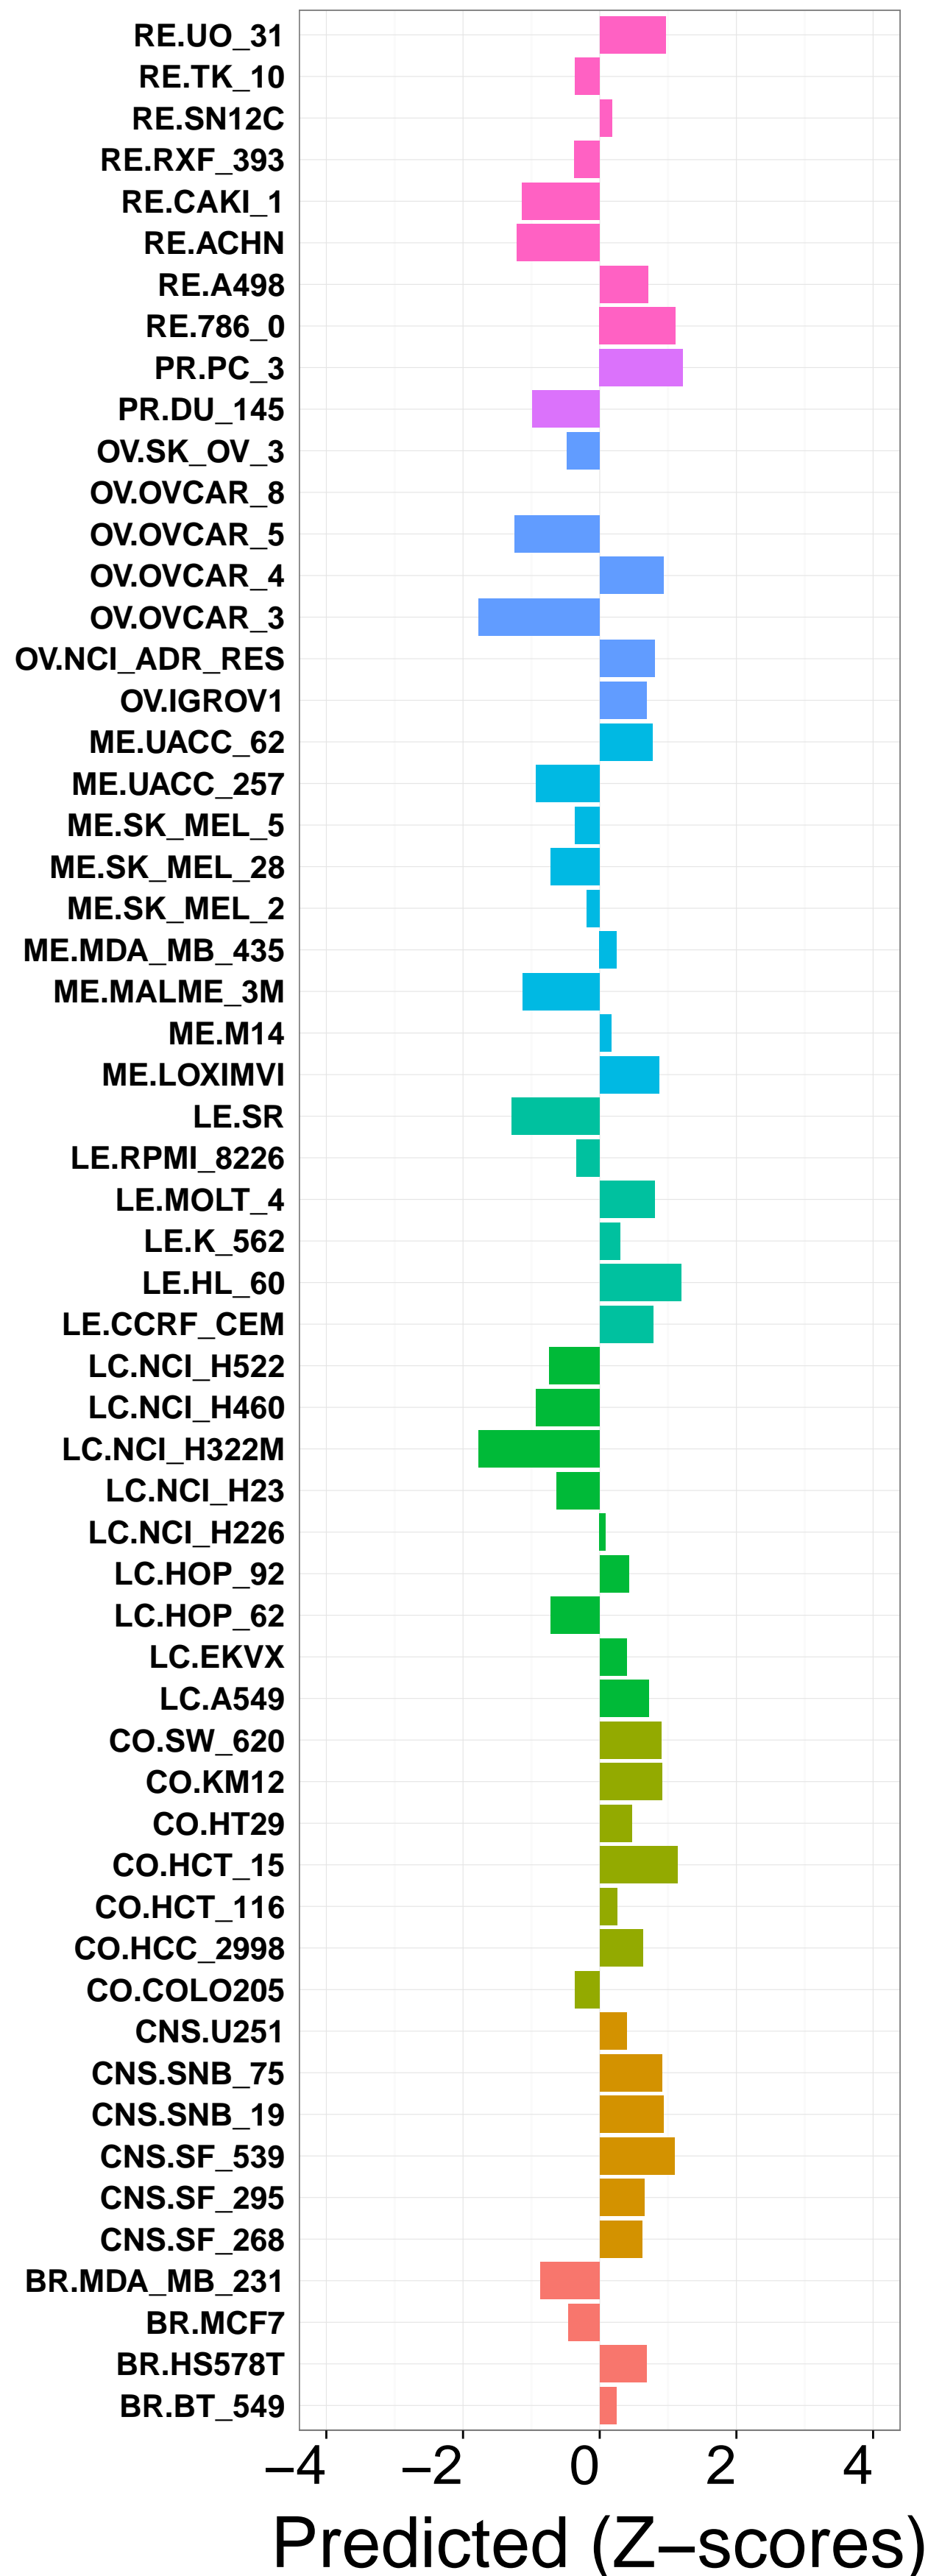



# NSC 630176, Romidepsin (LOCO)

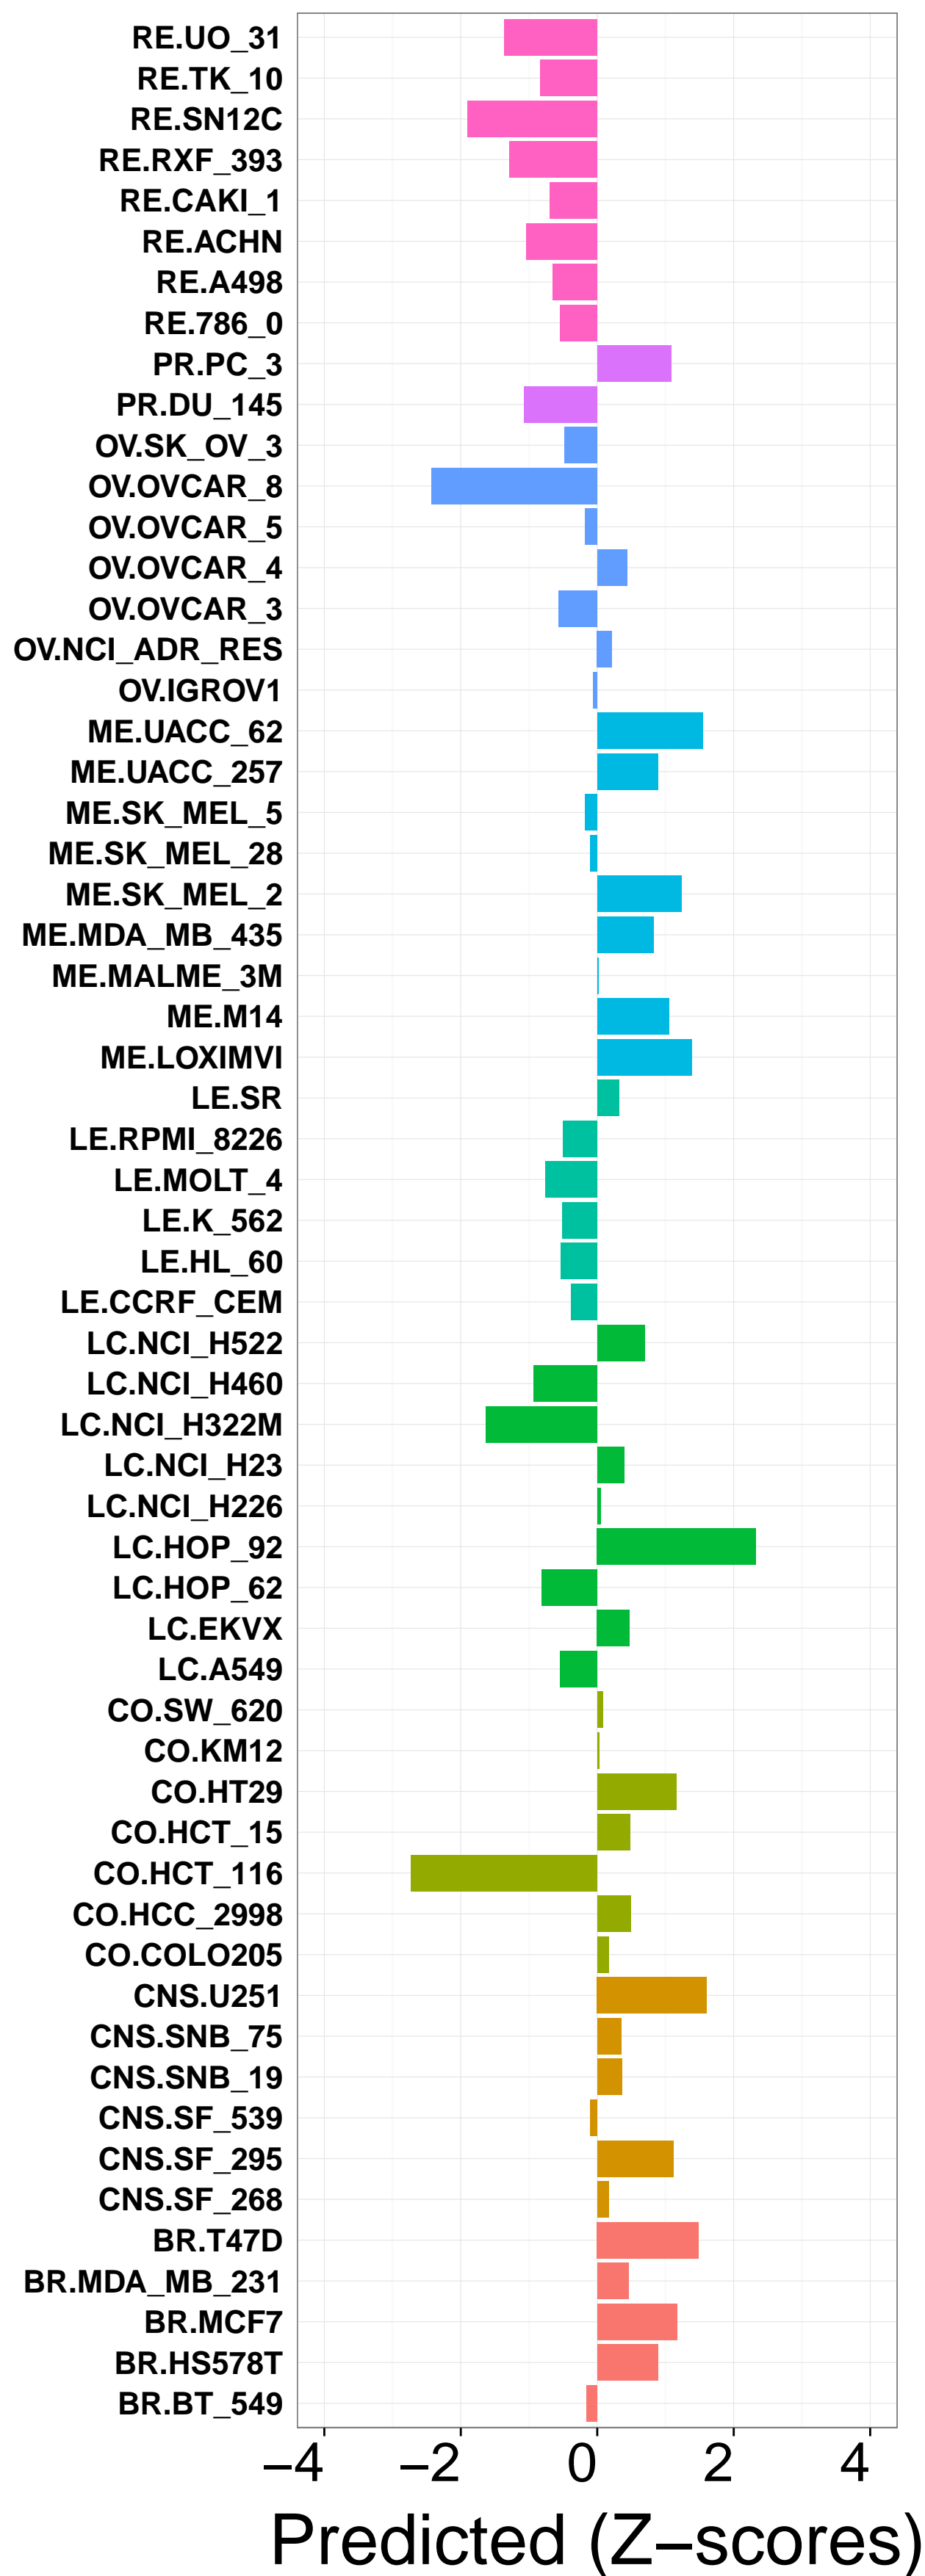

# NSC 633782, (LOCO)

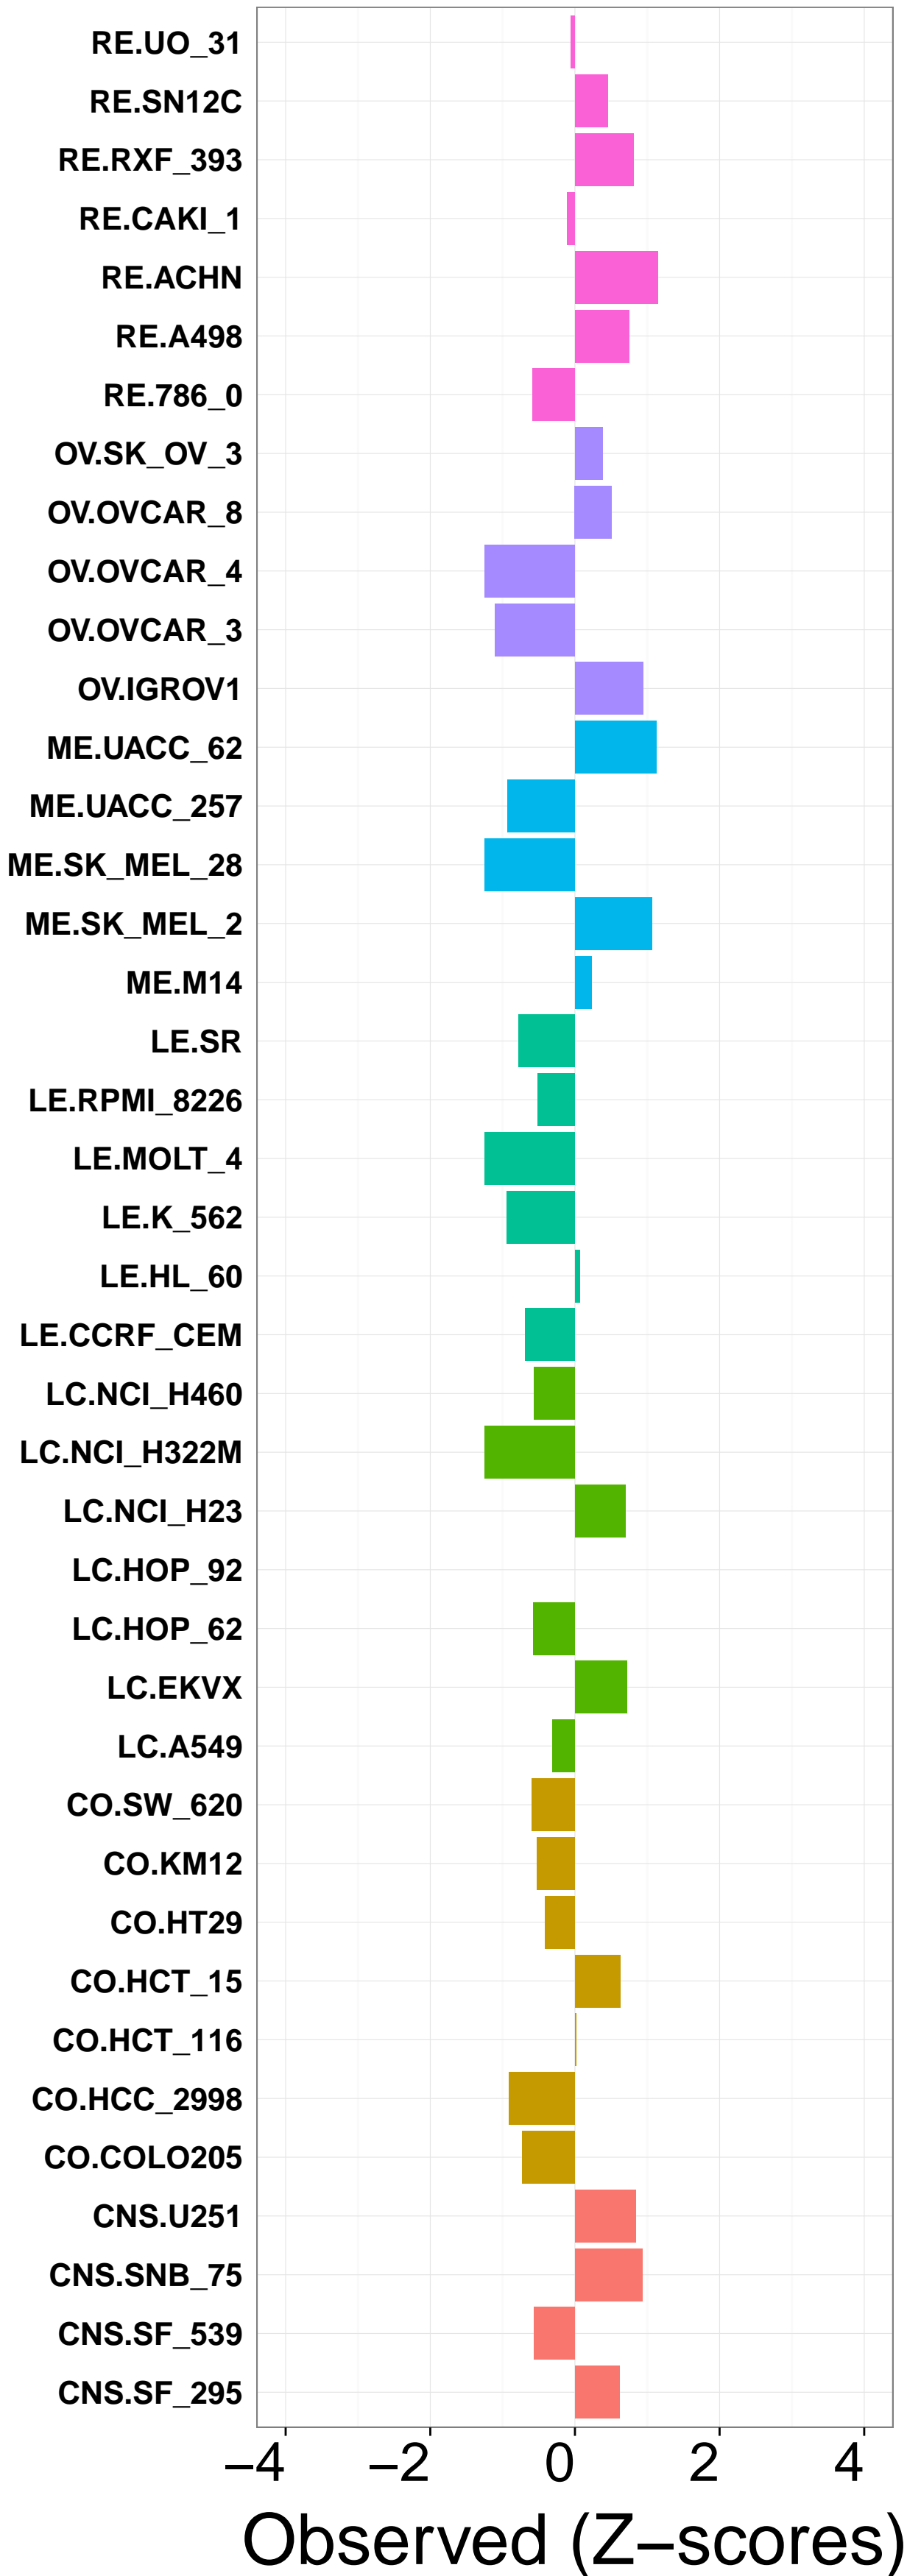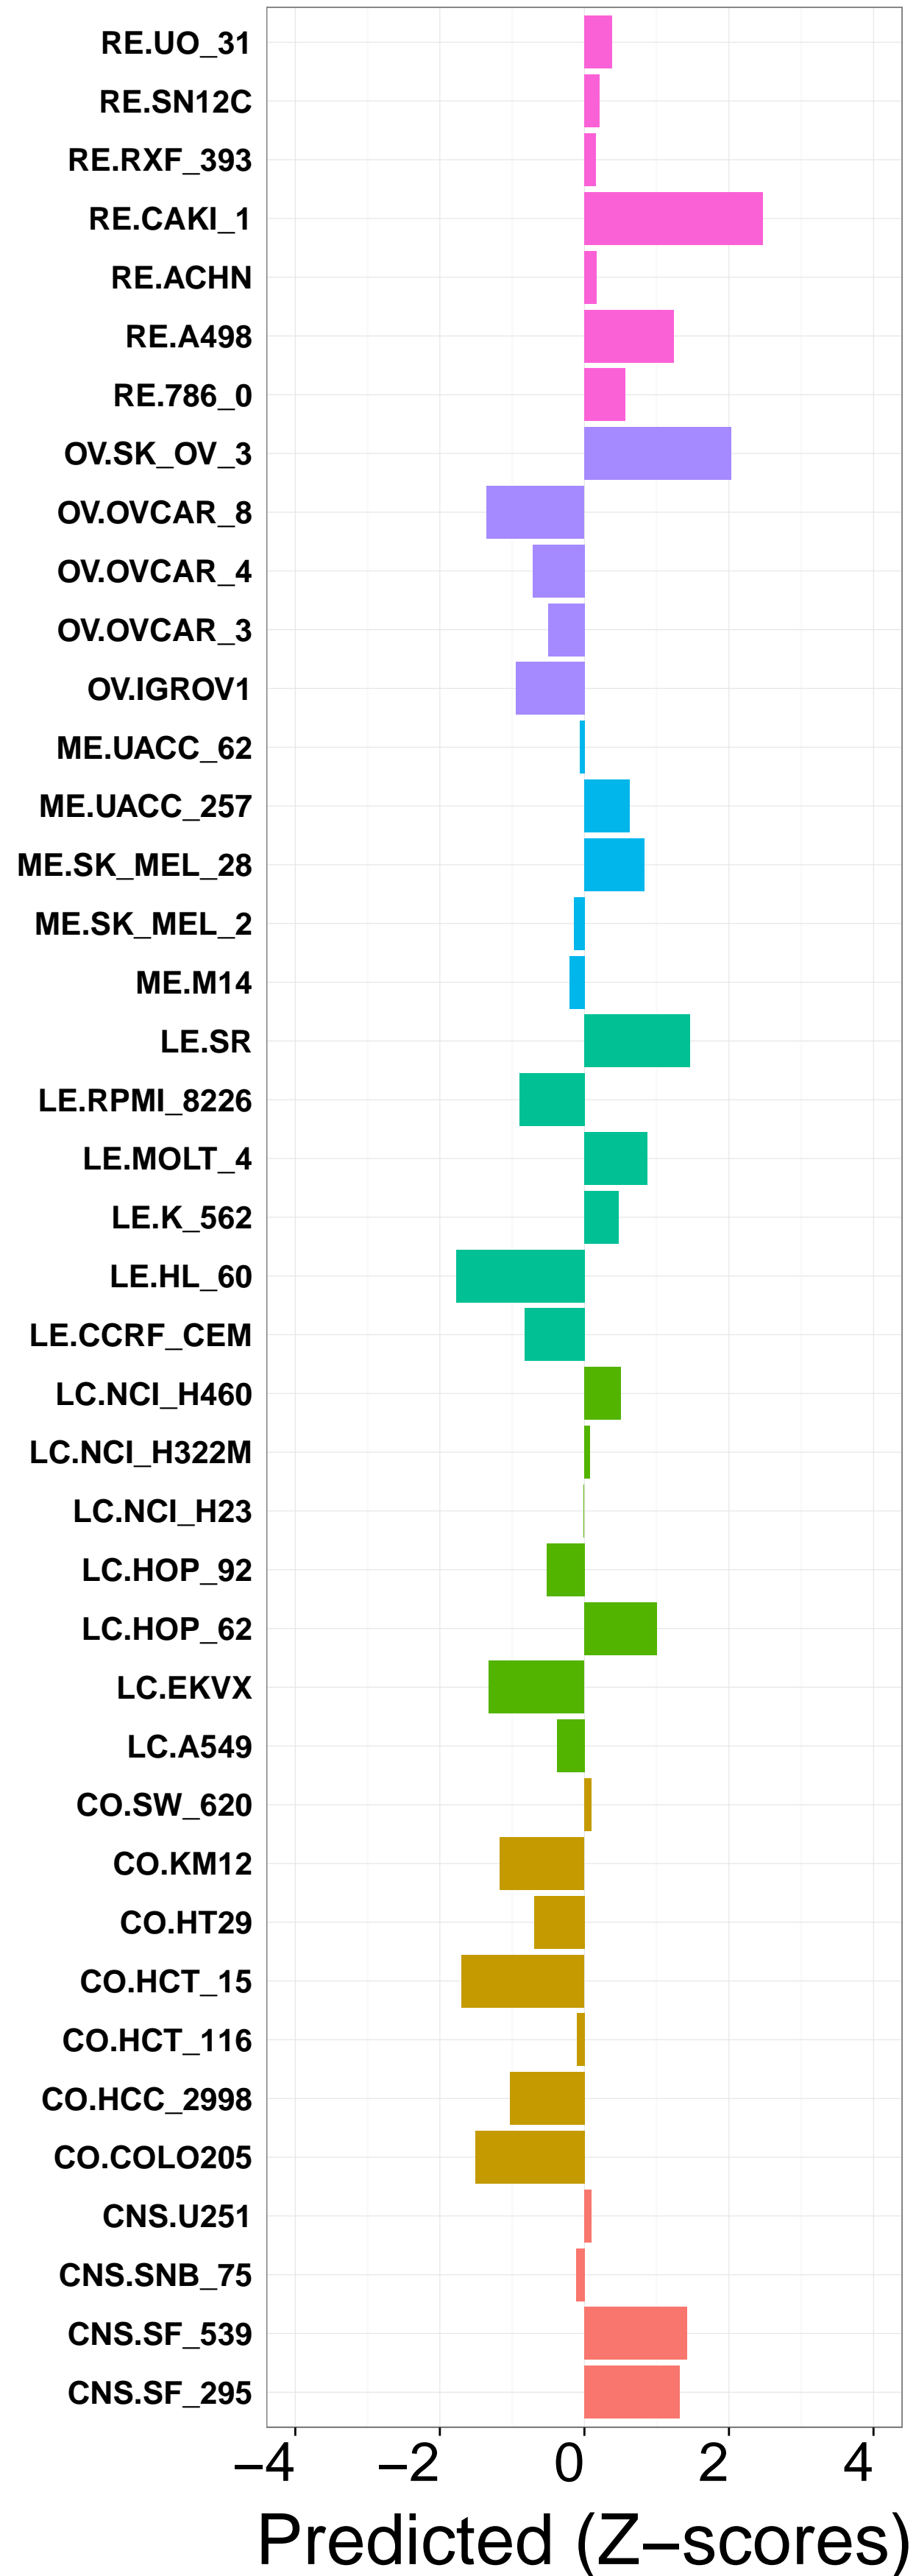

# NSC 63878, Cytarabine\_Hydrochloride (LOCO)

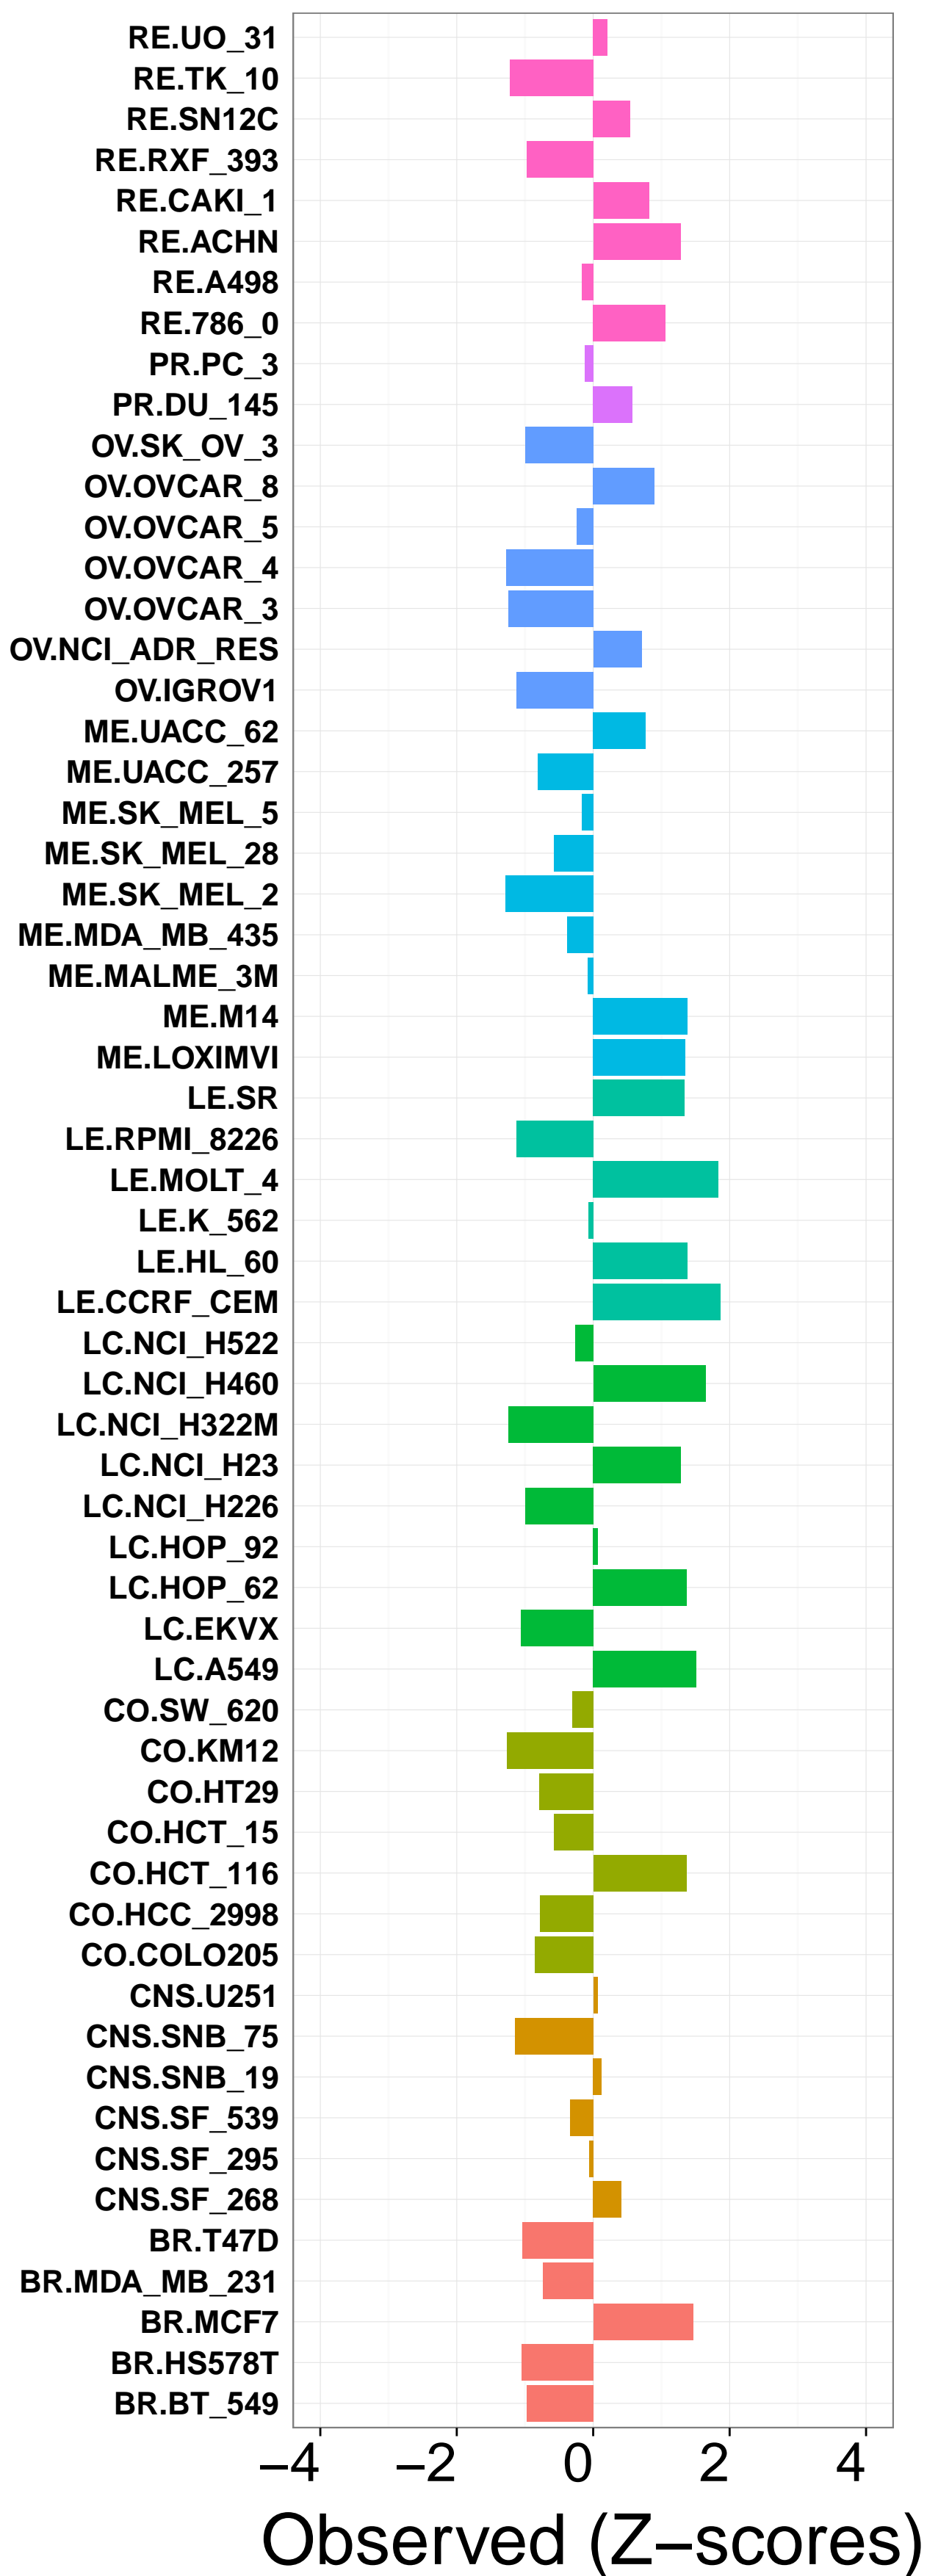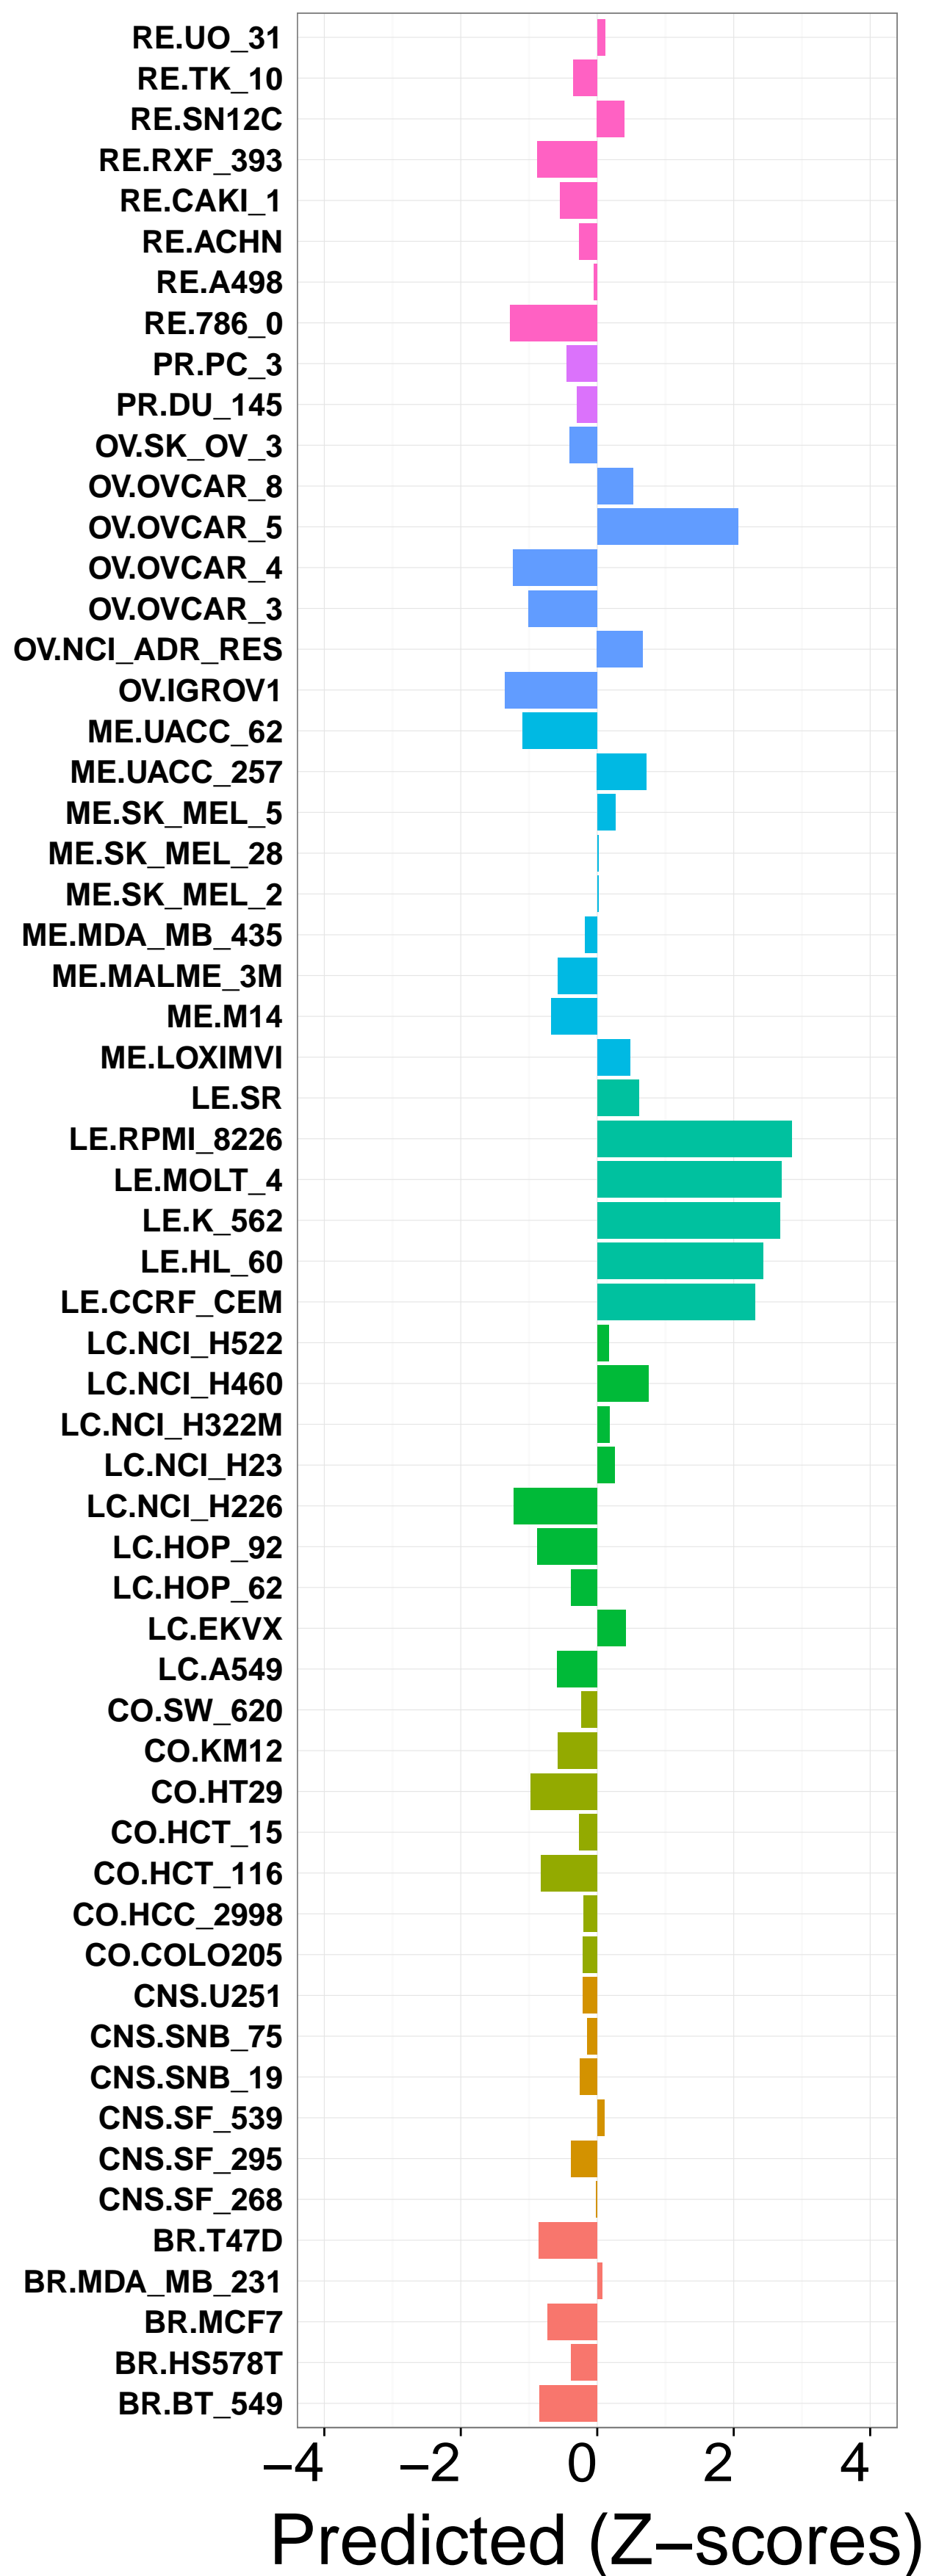

# NSC 639186, (LOCO)

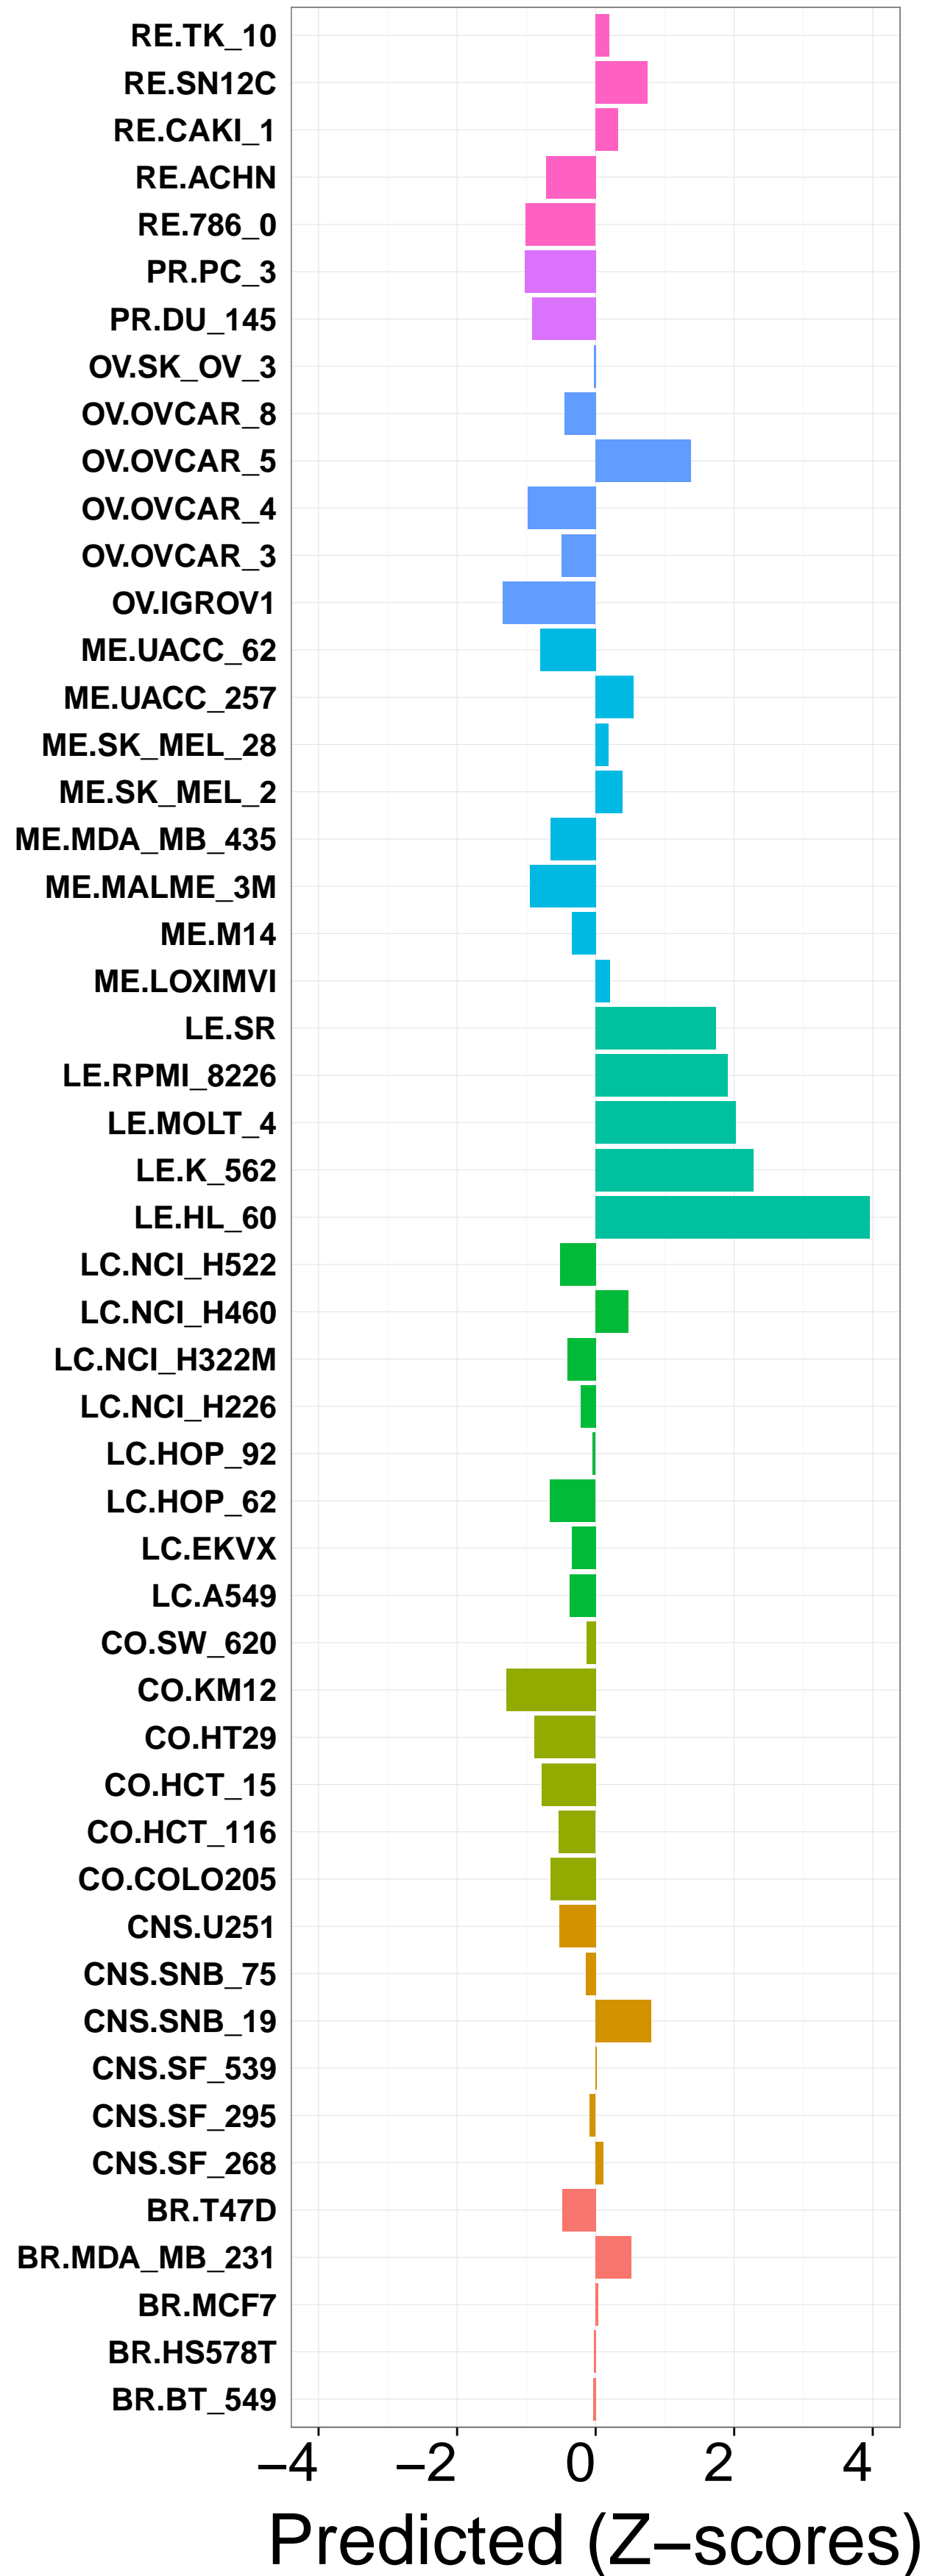

# NSC 656576, (LOCO)

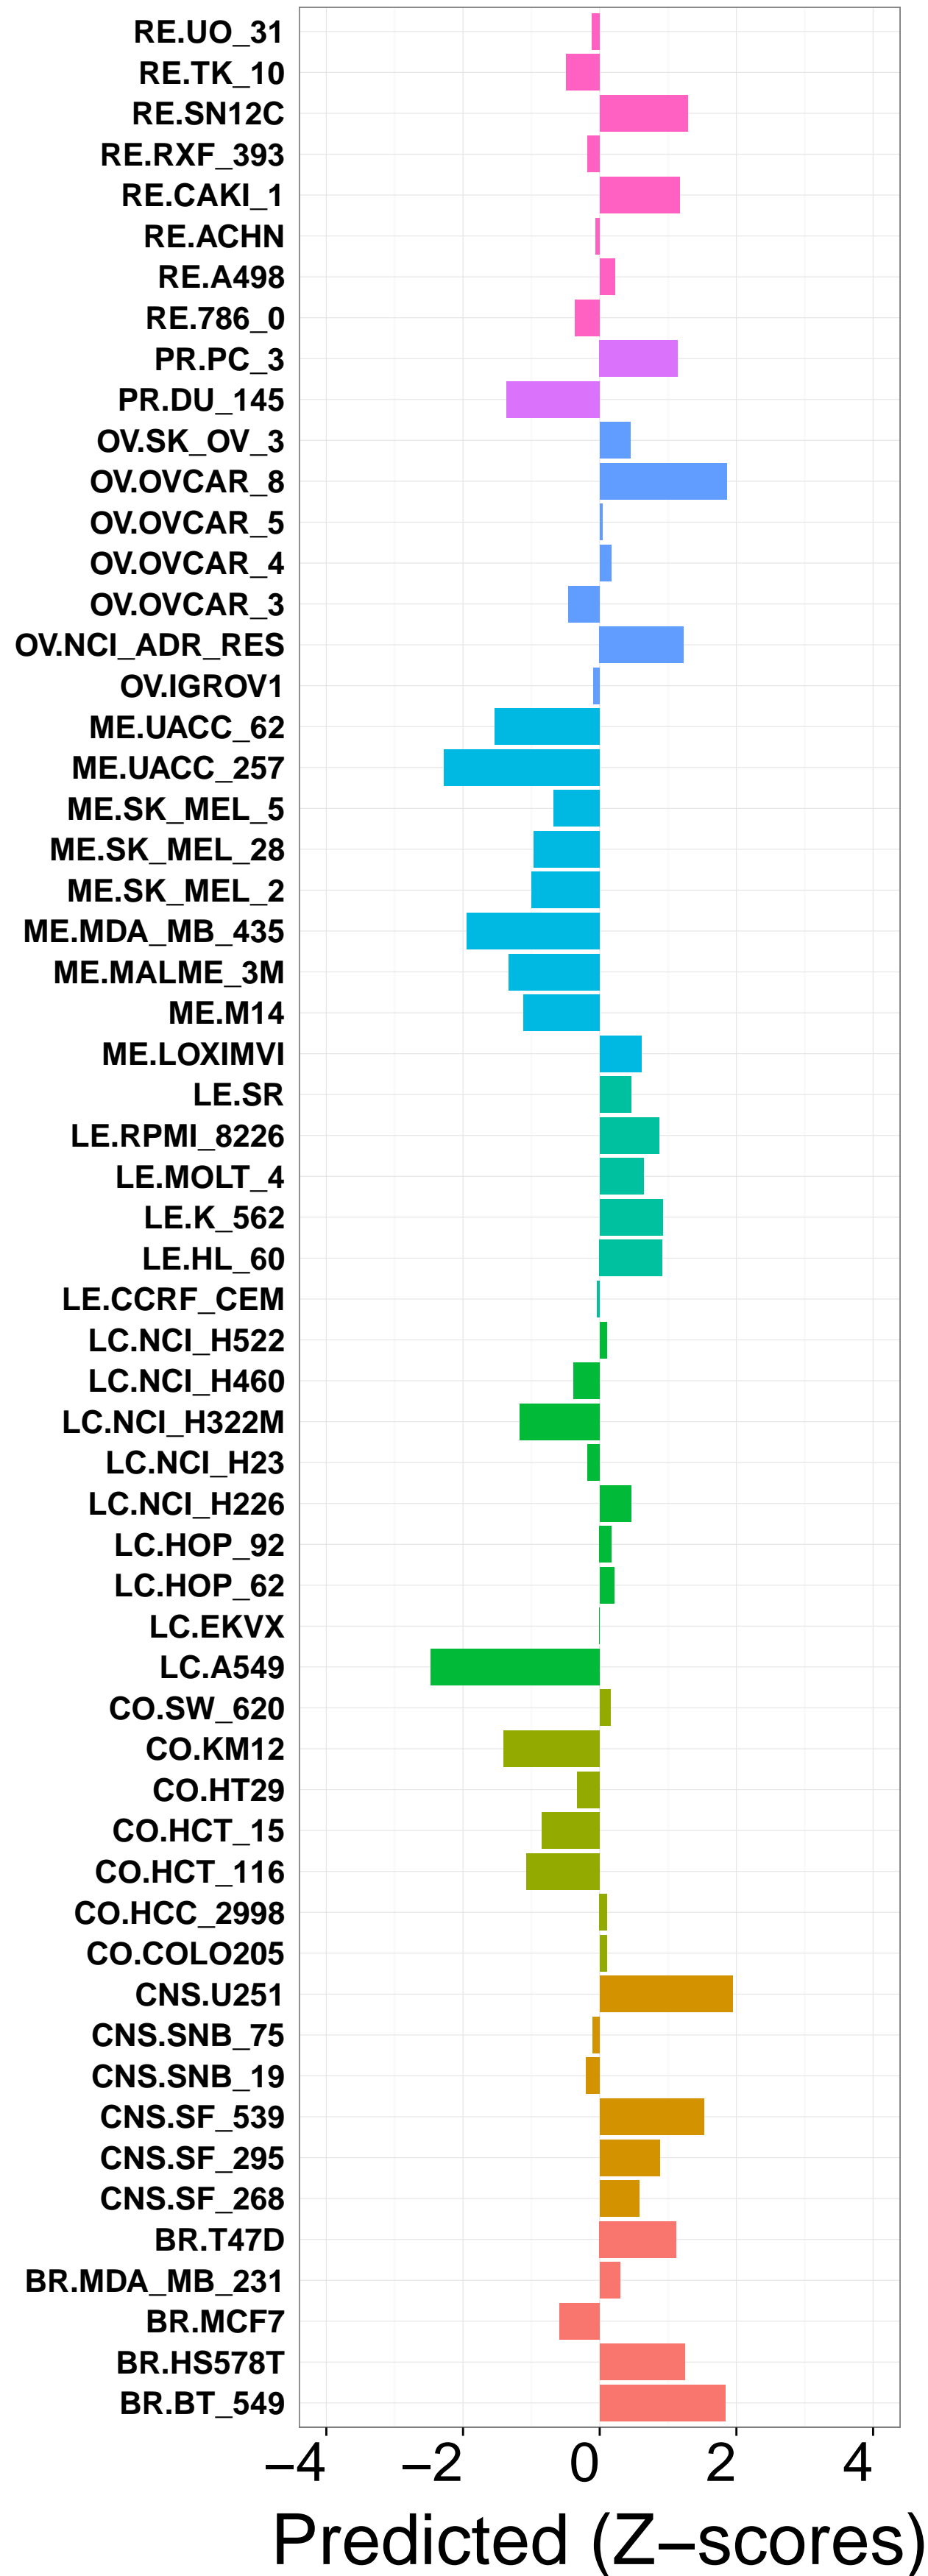



# NSC 673596, (LOCO)

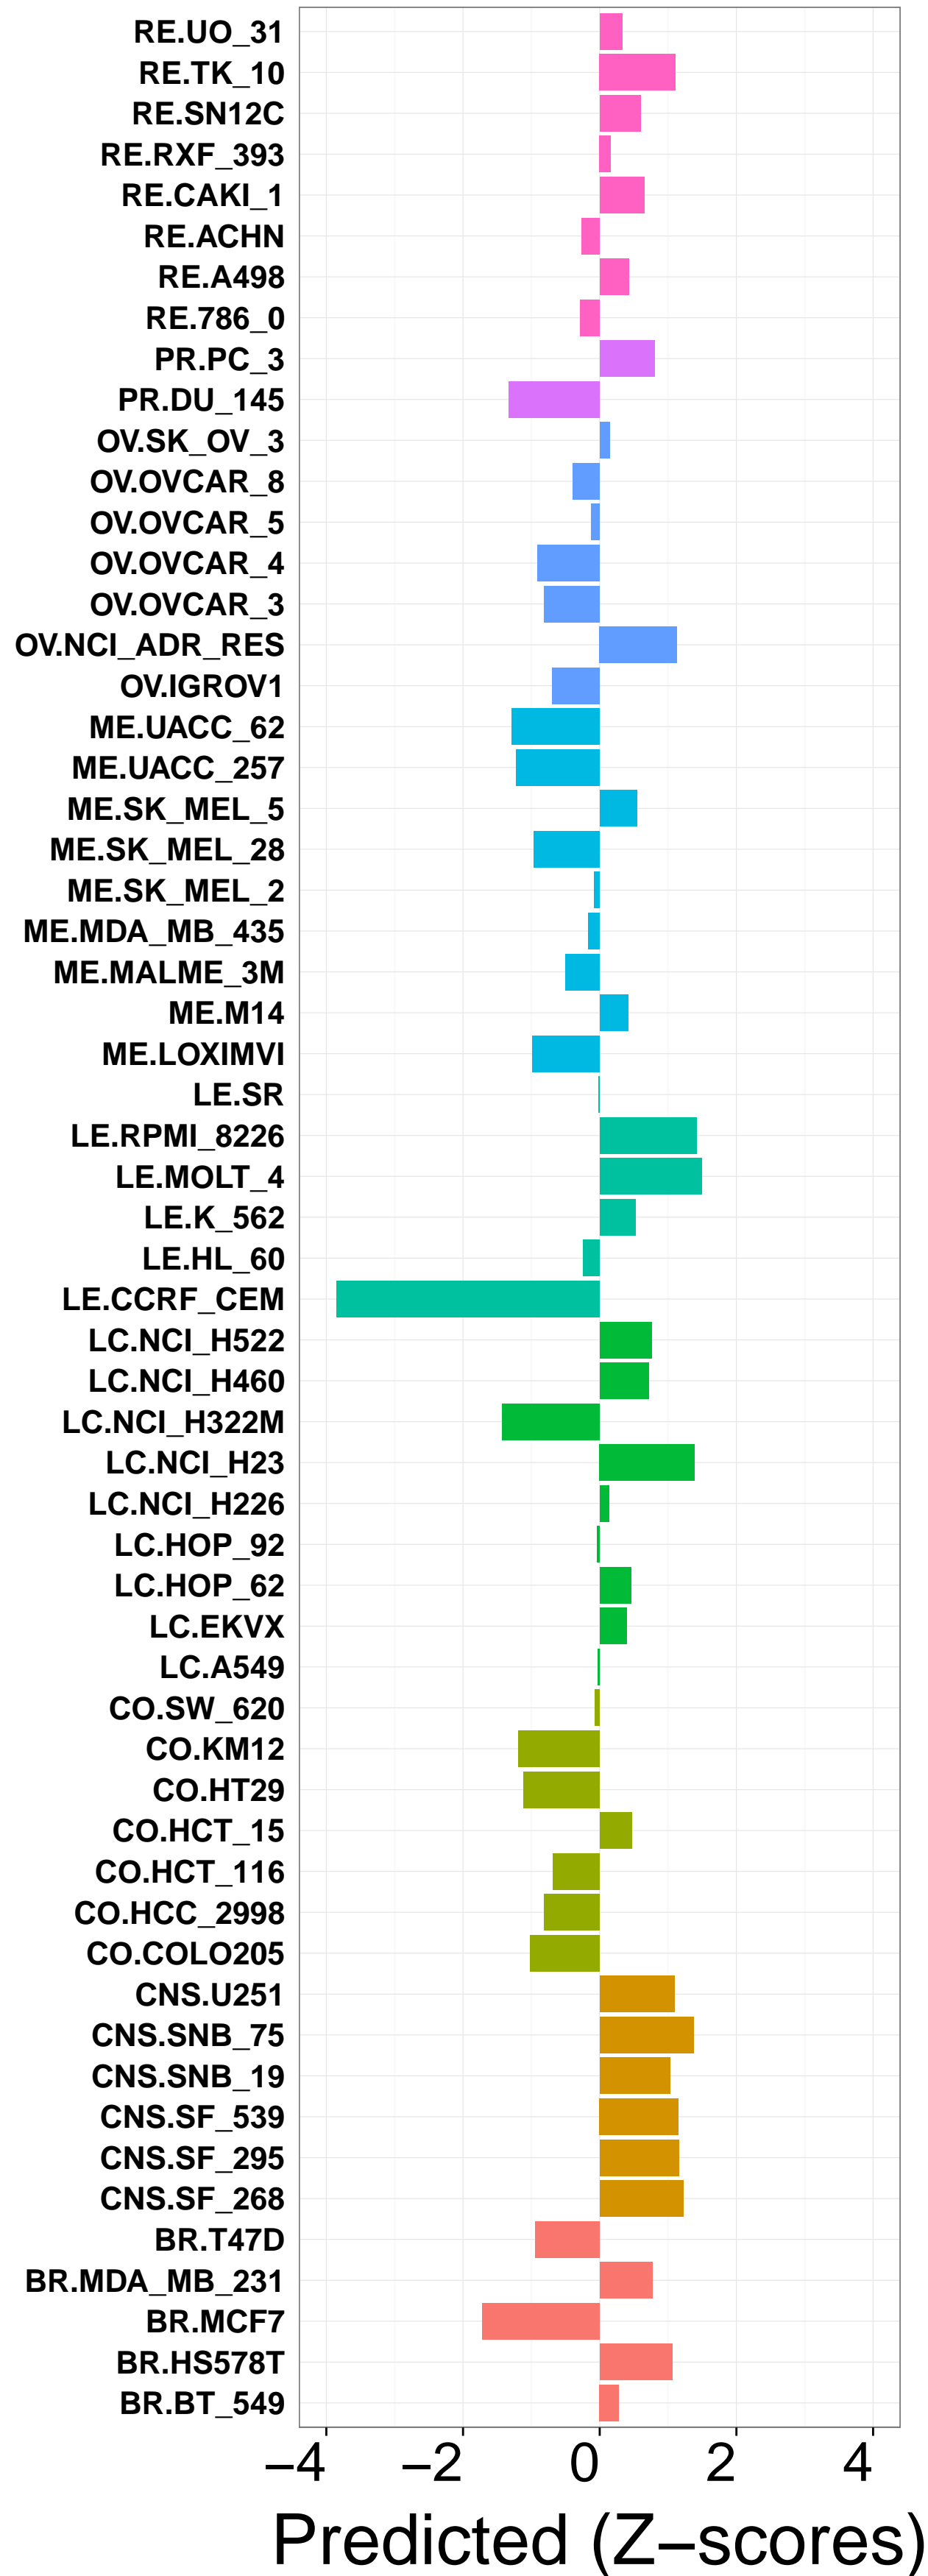

# NSC 686288, (LOCO)

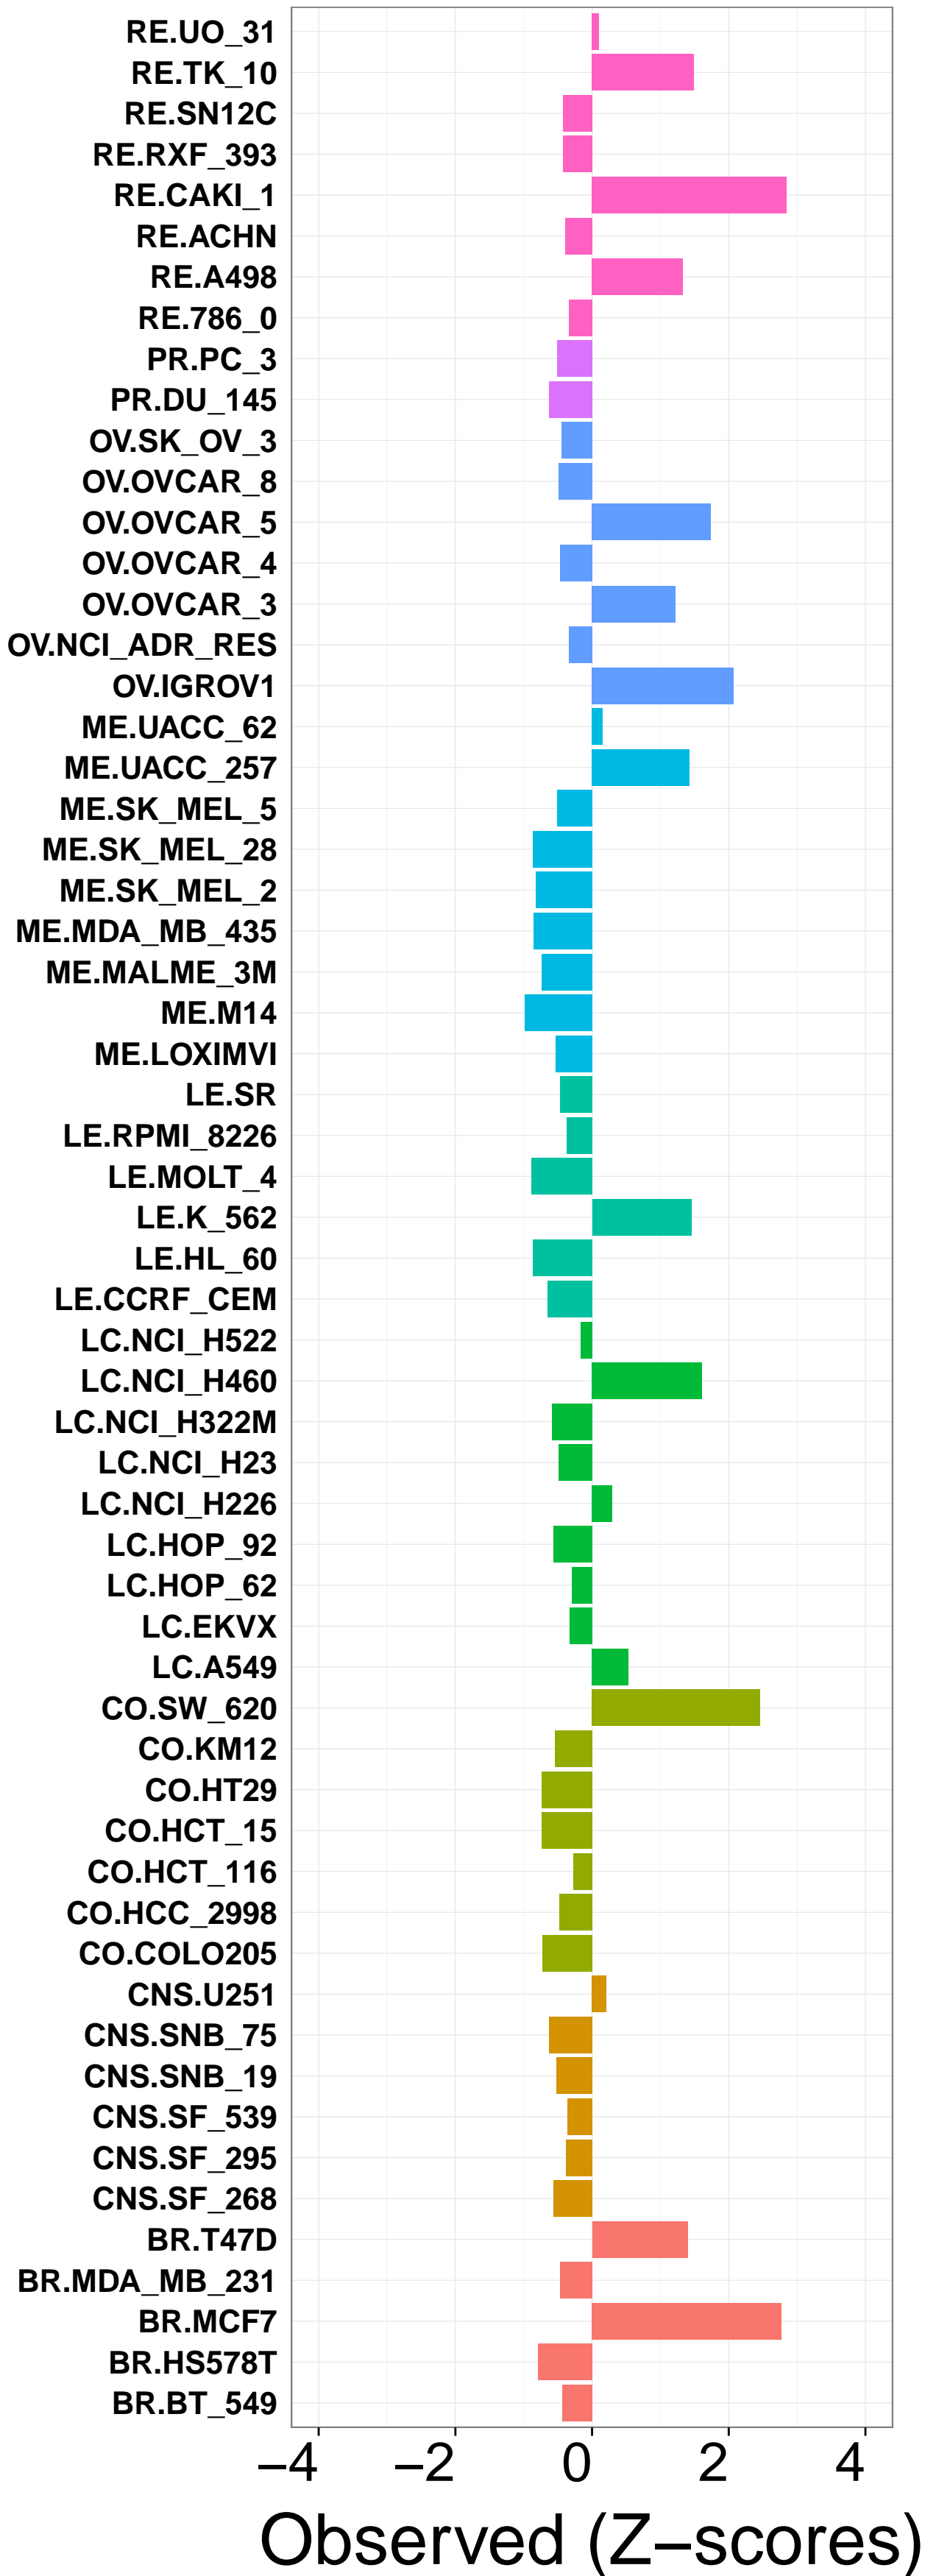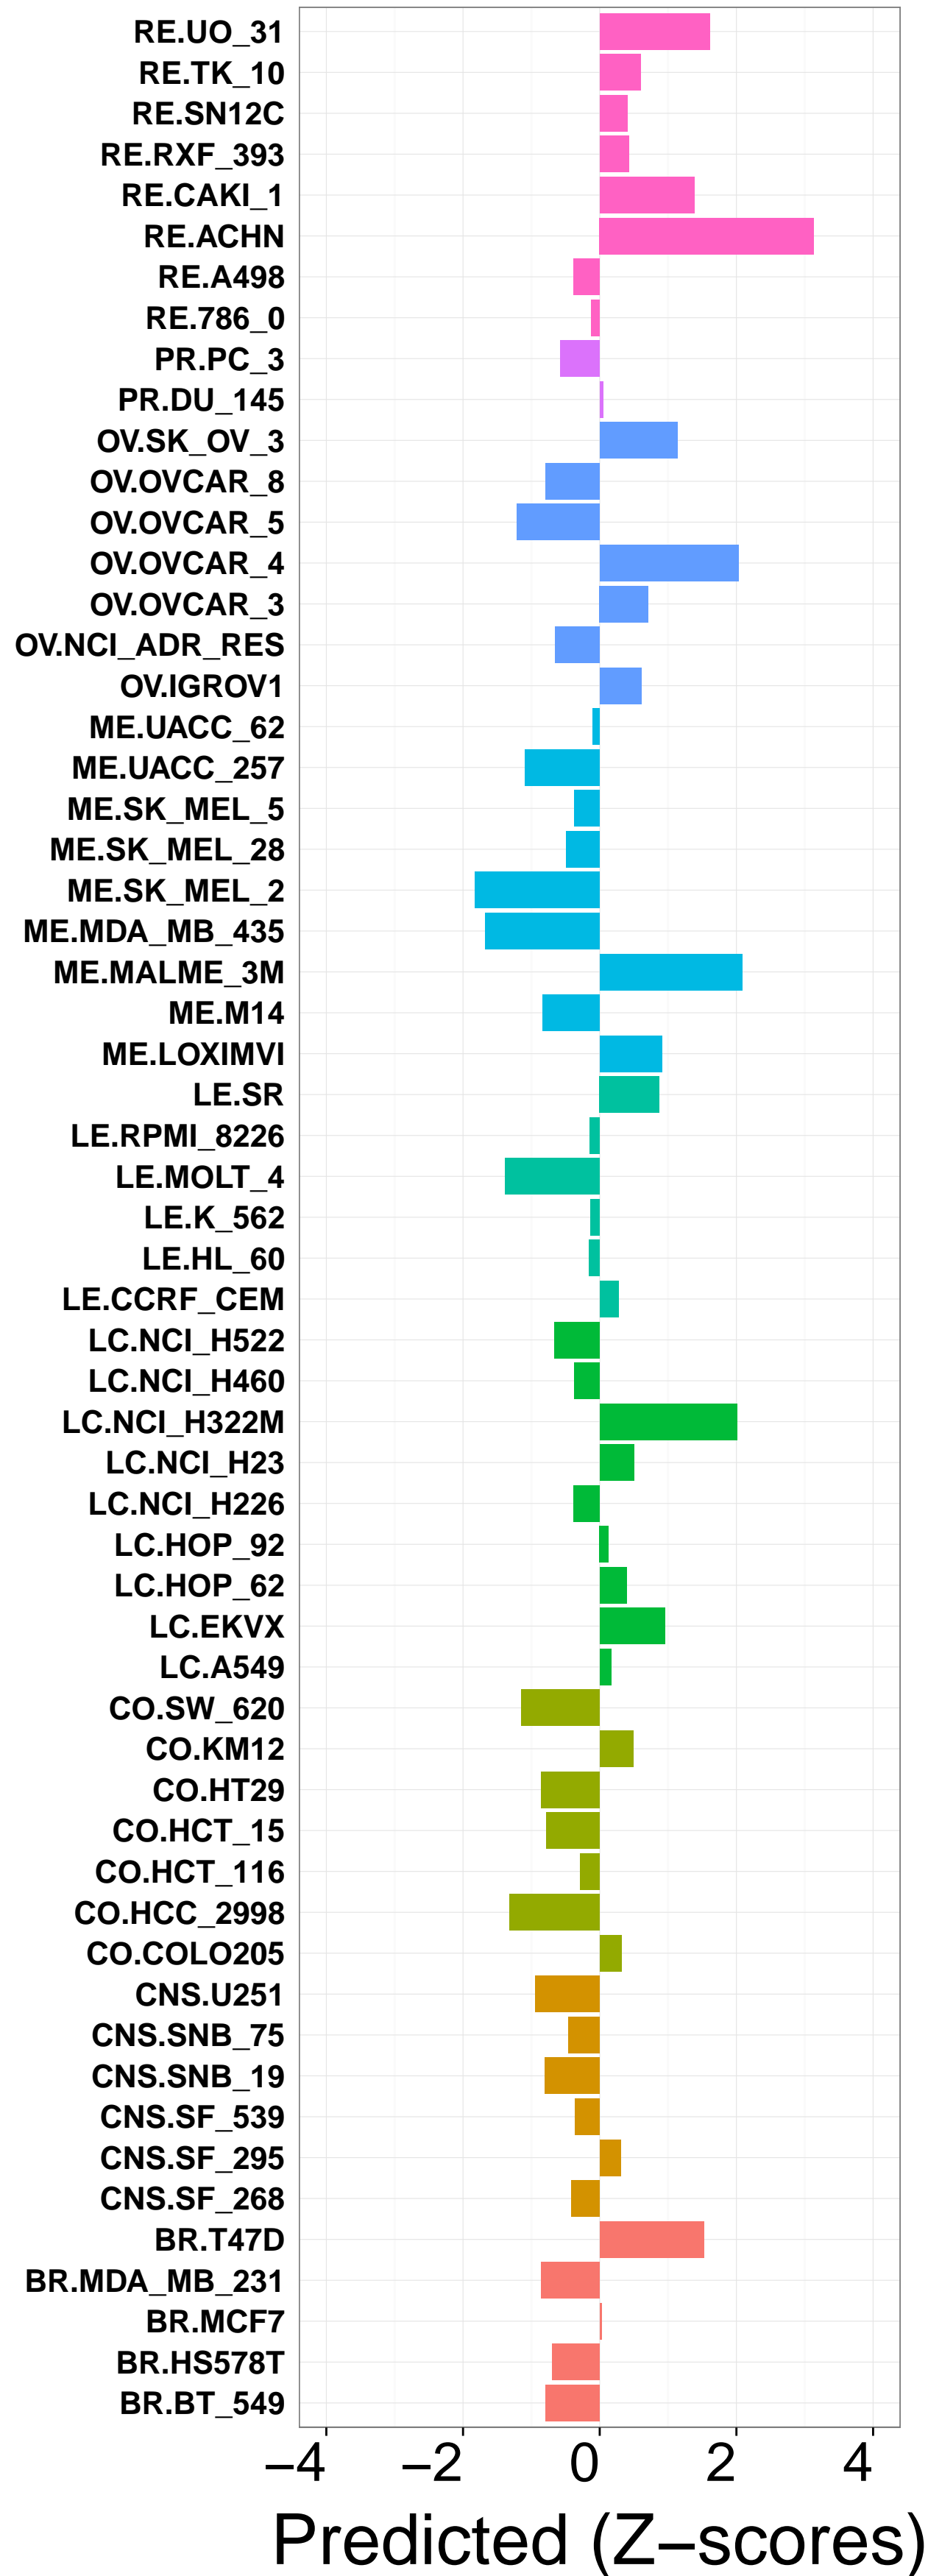

# NSC 698037, (LOCO)

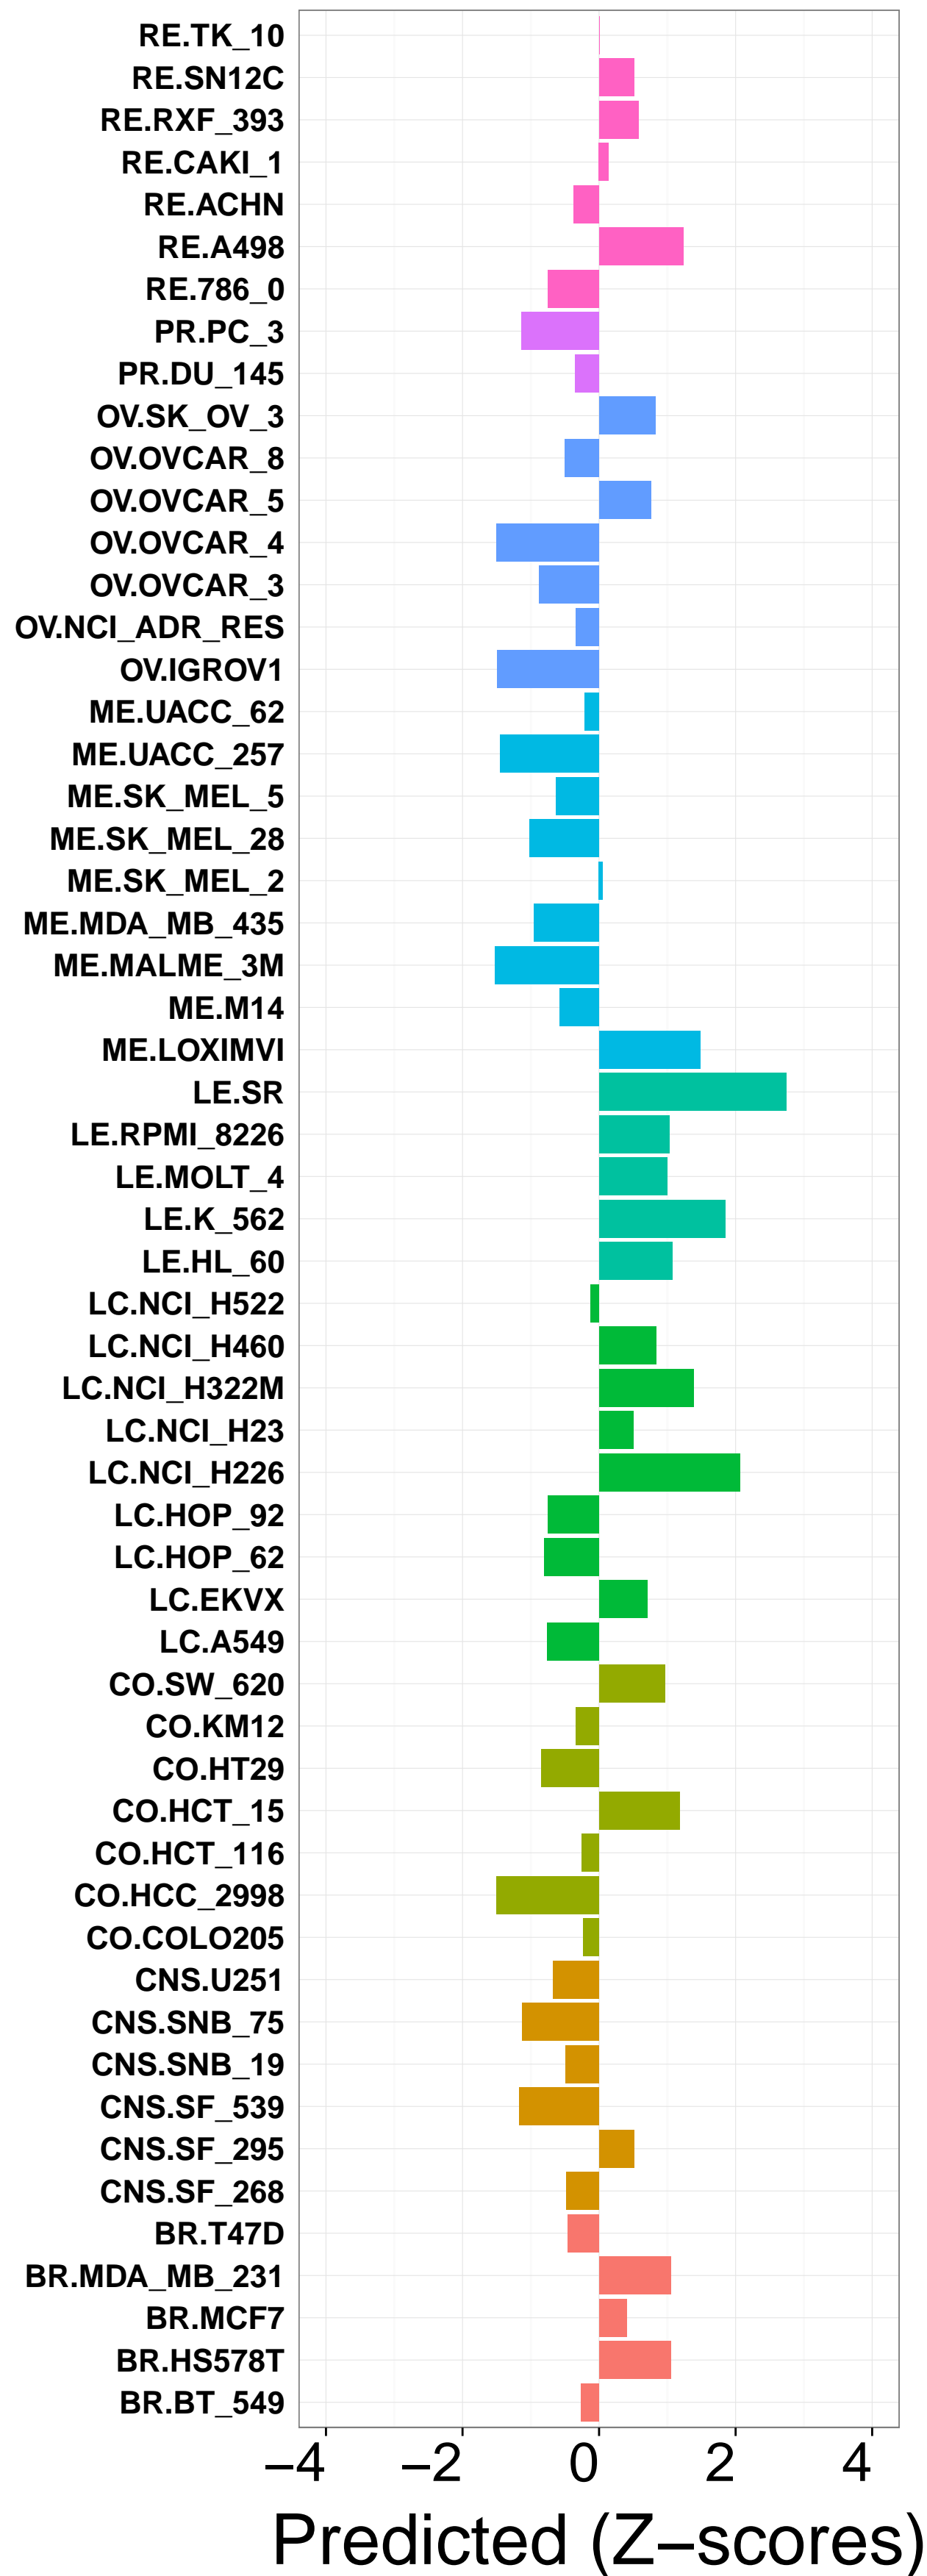

# NSC 707545, Alvespimycin (LOCO)

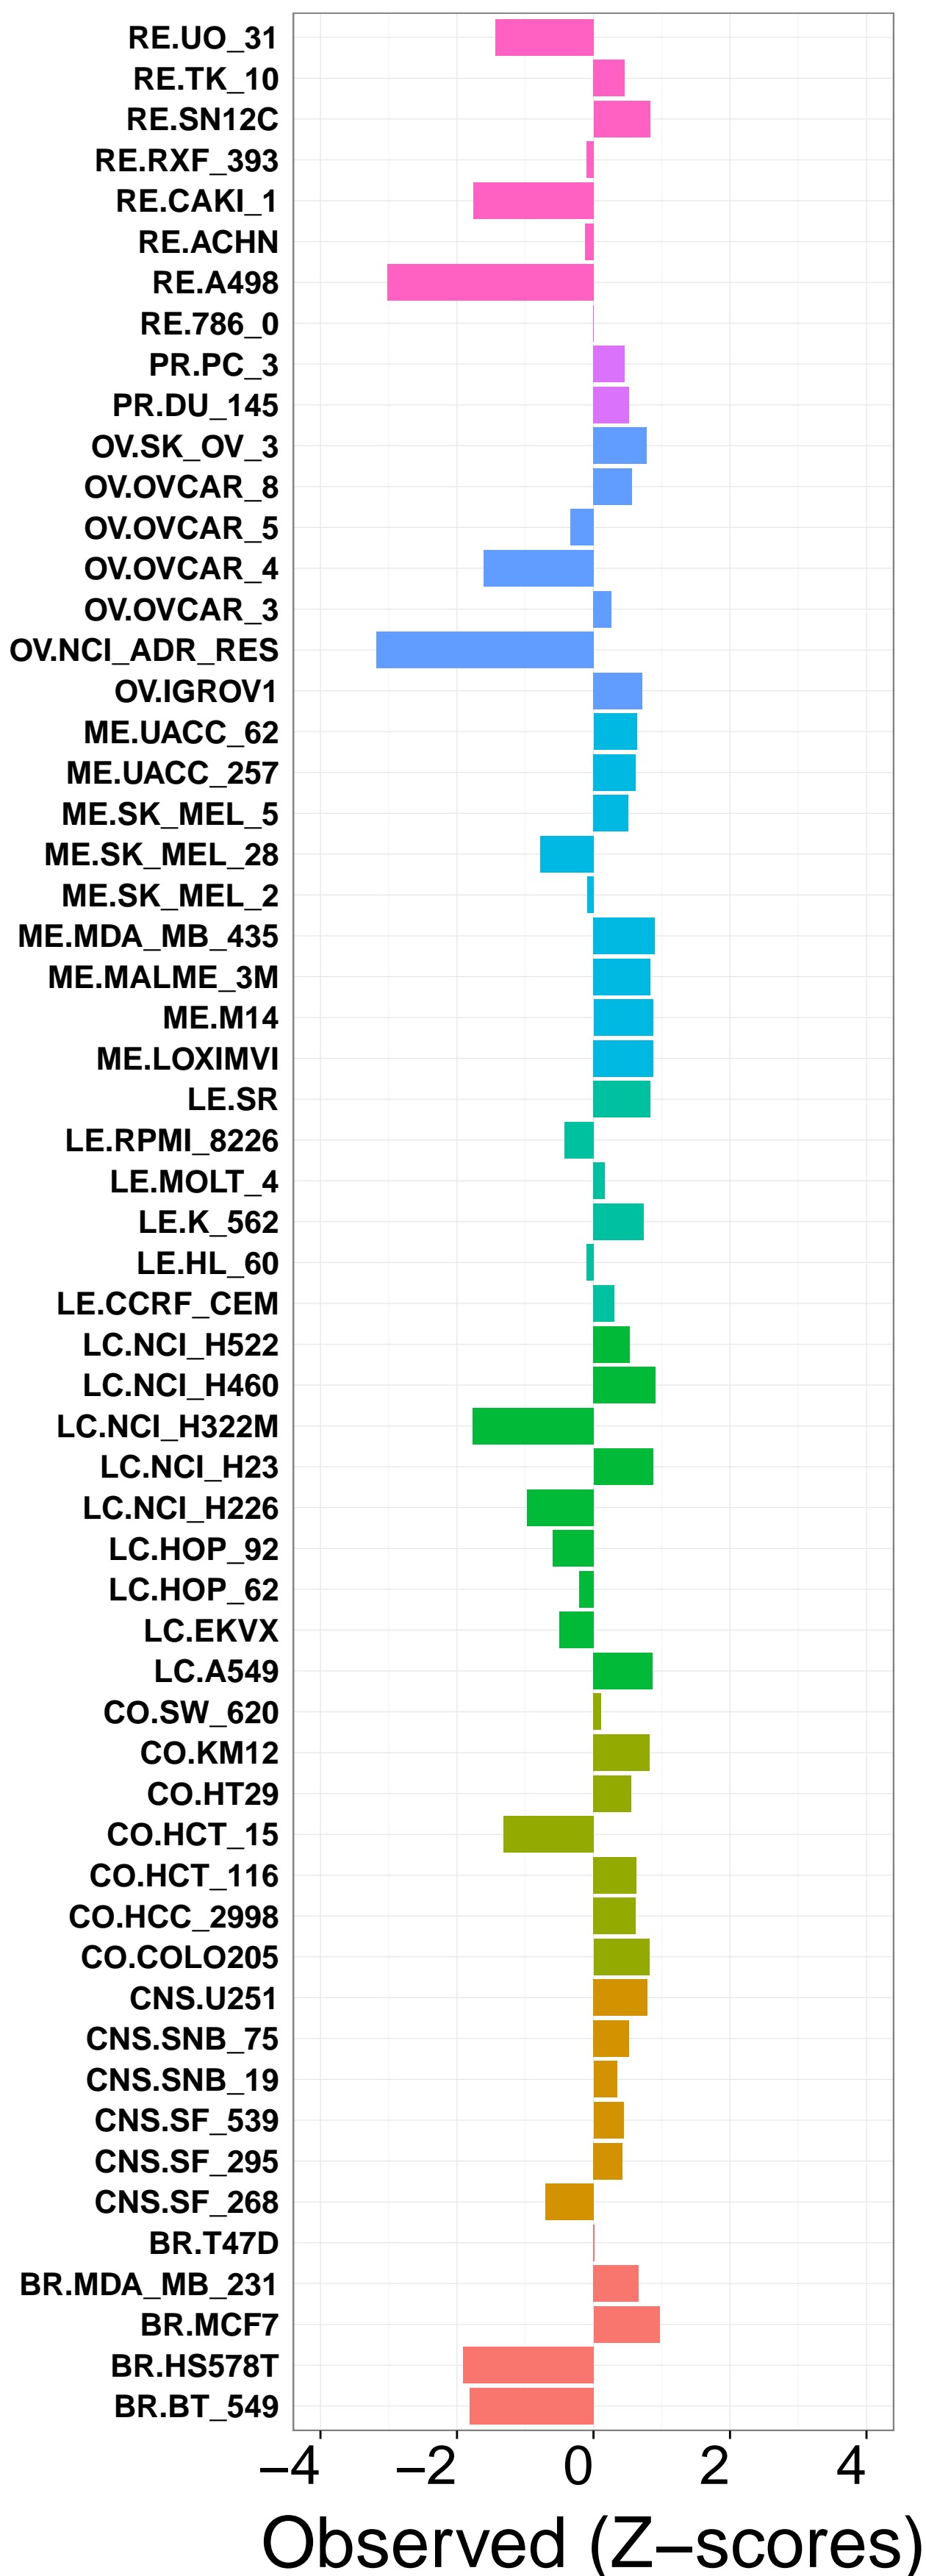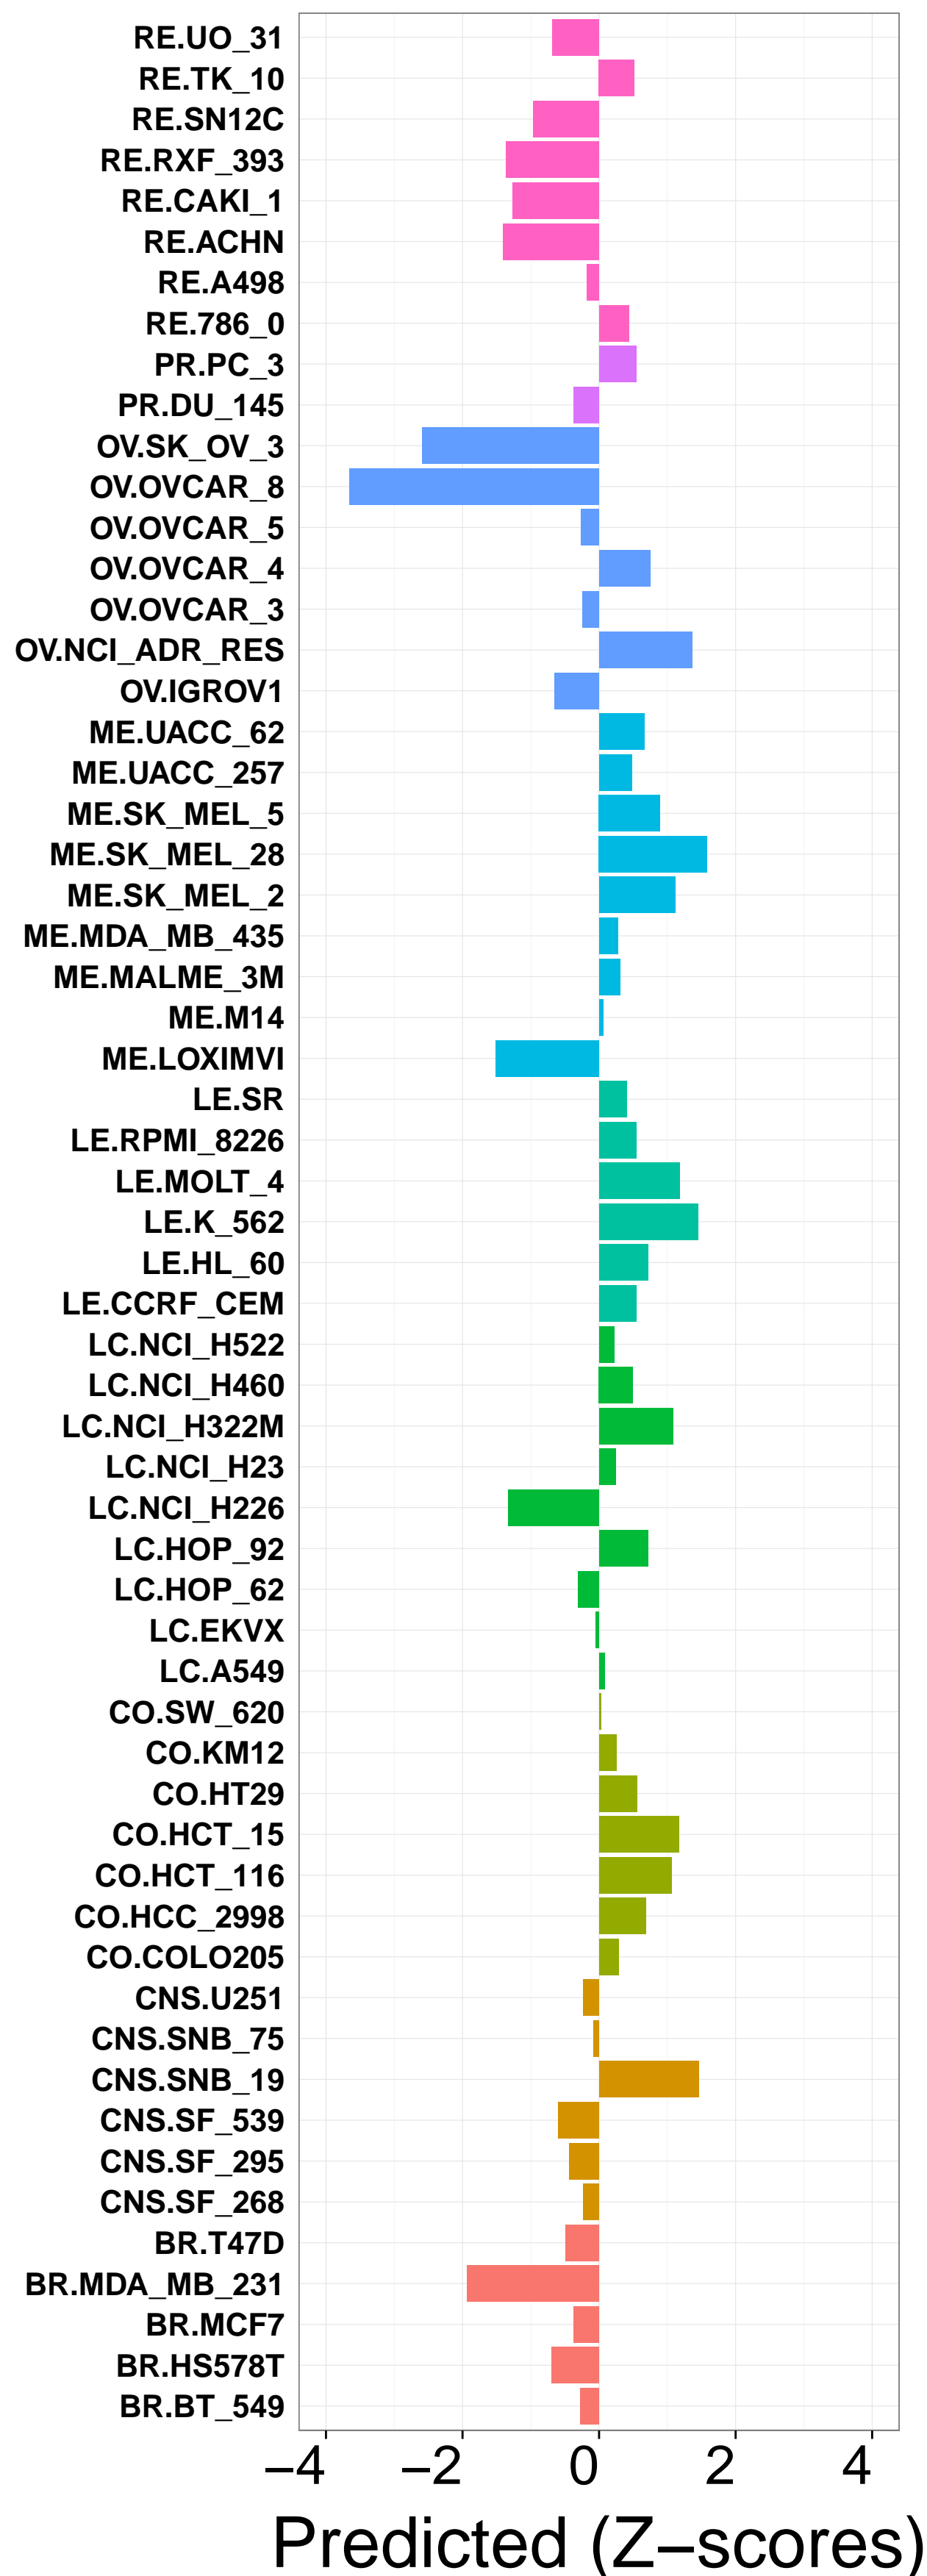

# NSC 710297, OMDPI (LOCO)

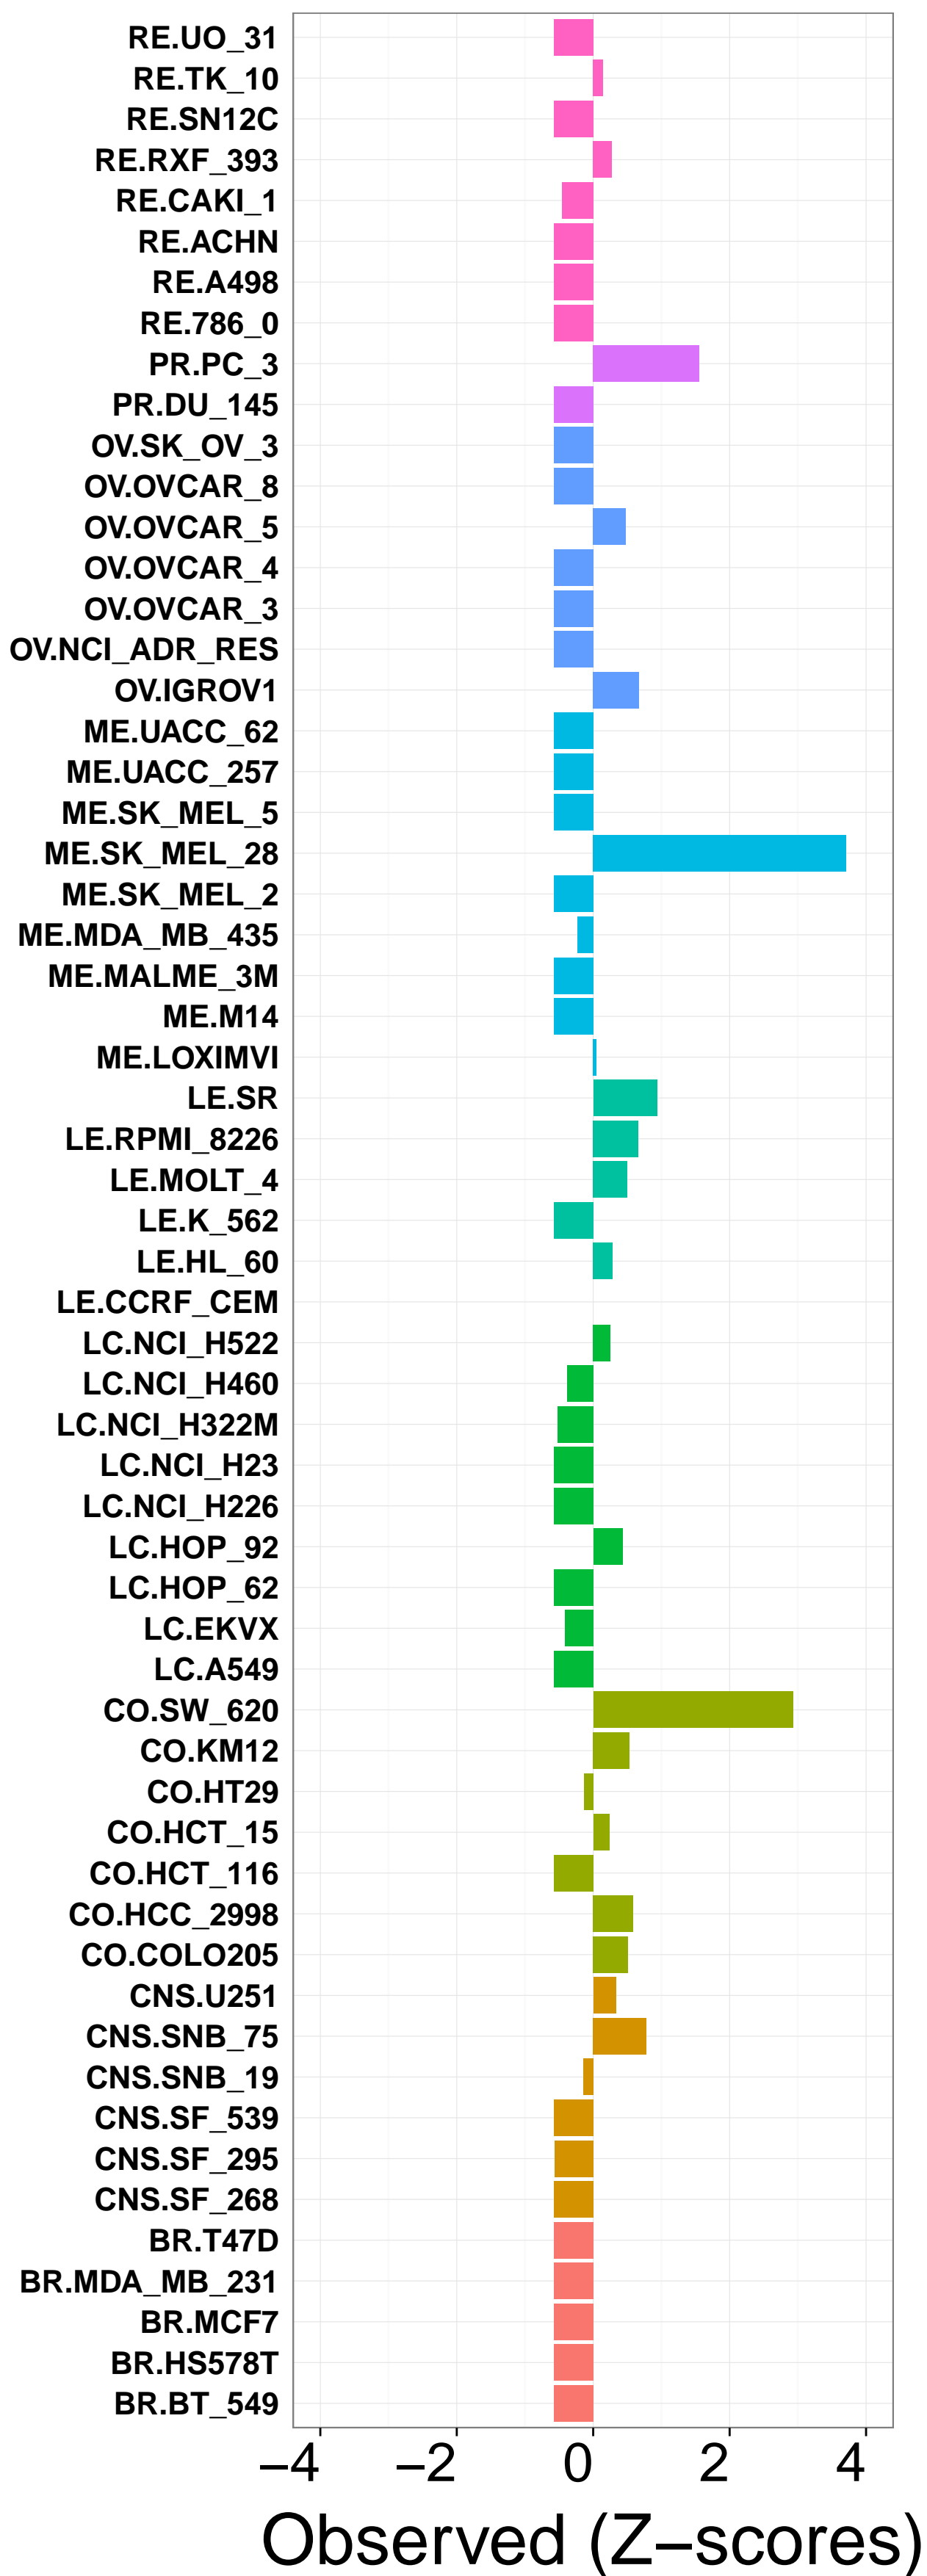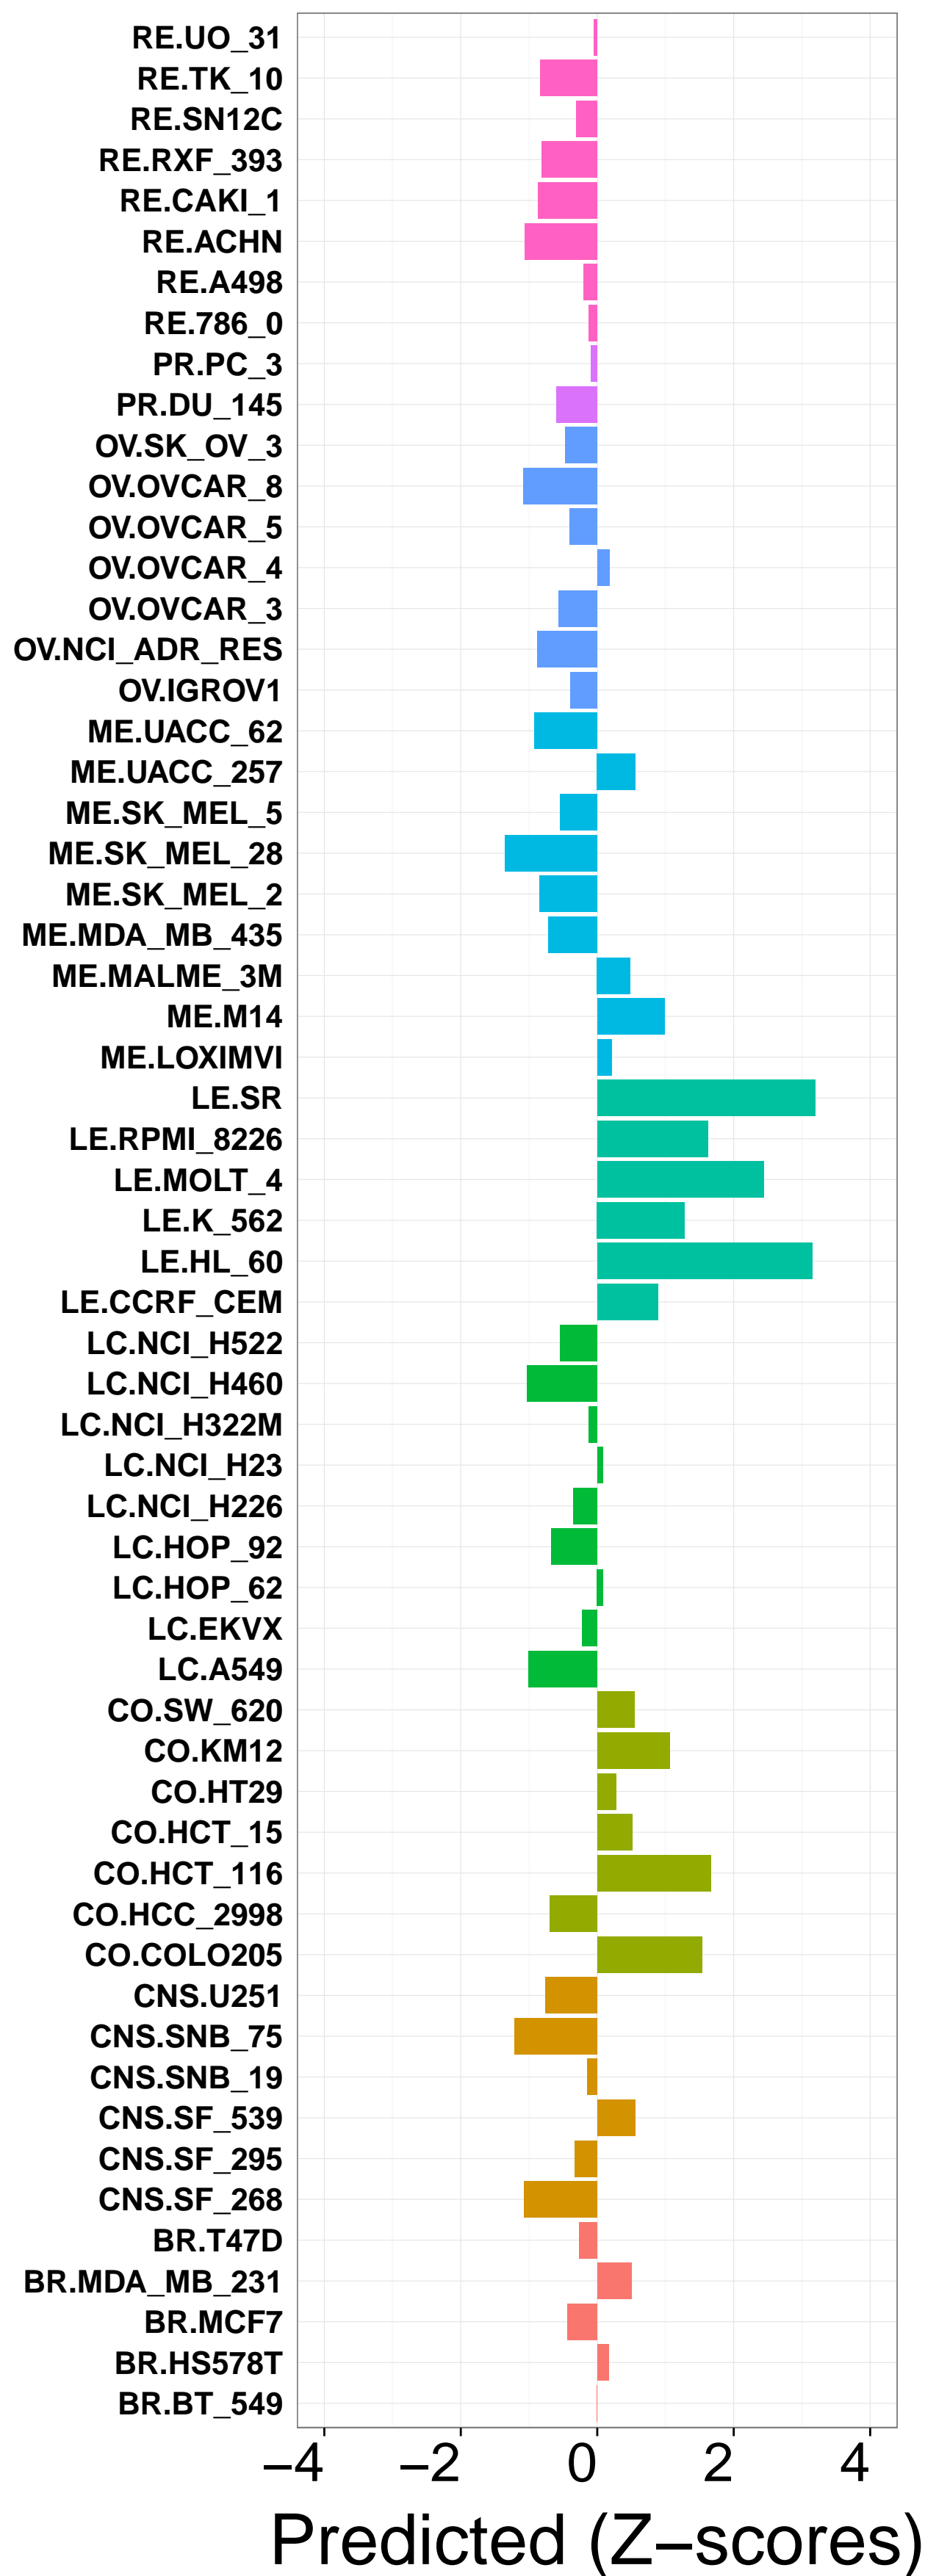



# NSC 710464, (LOCO)

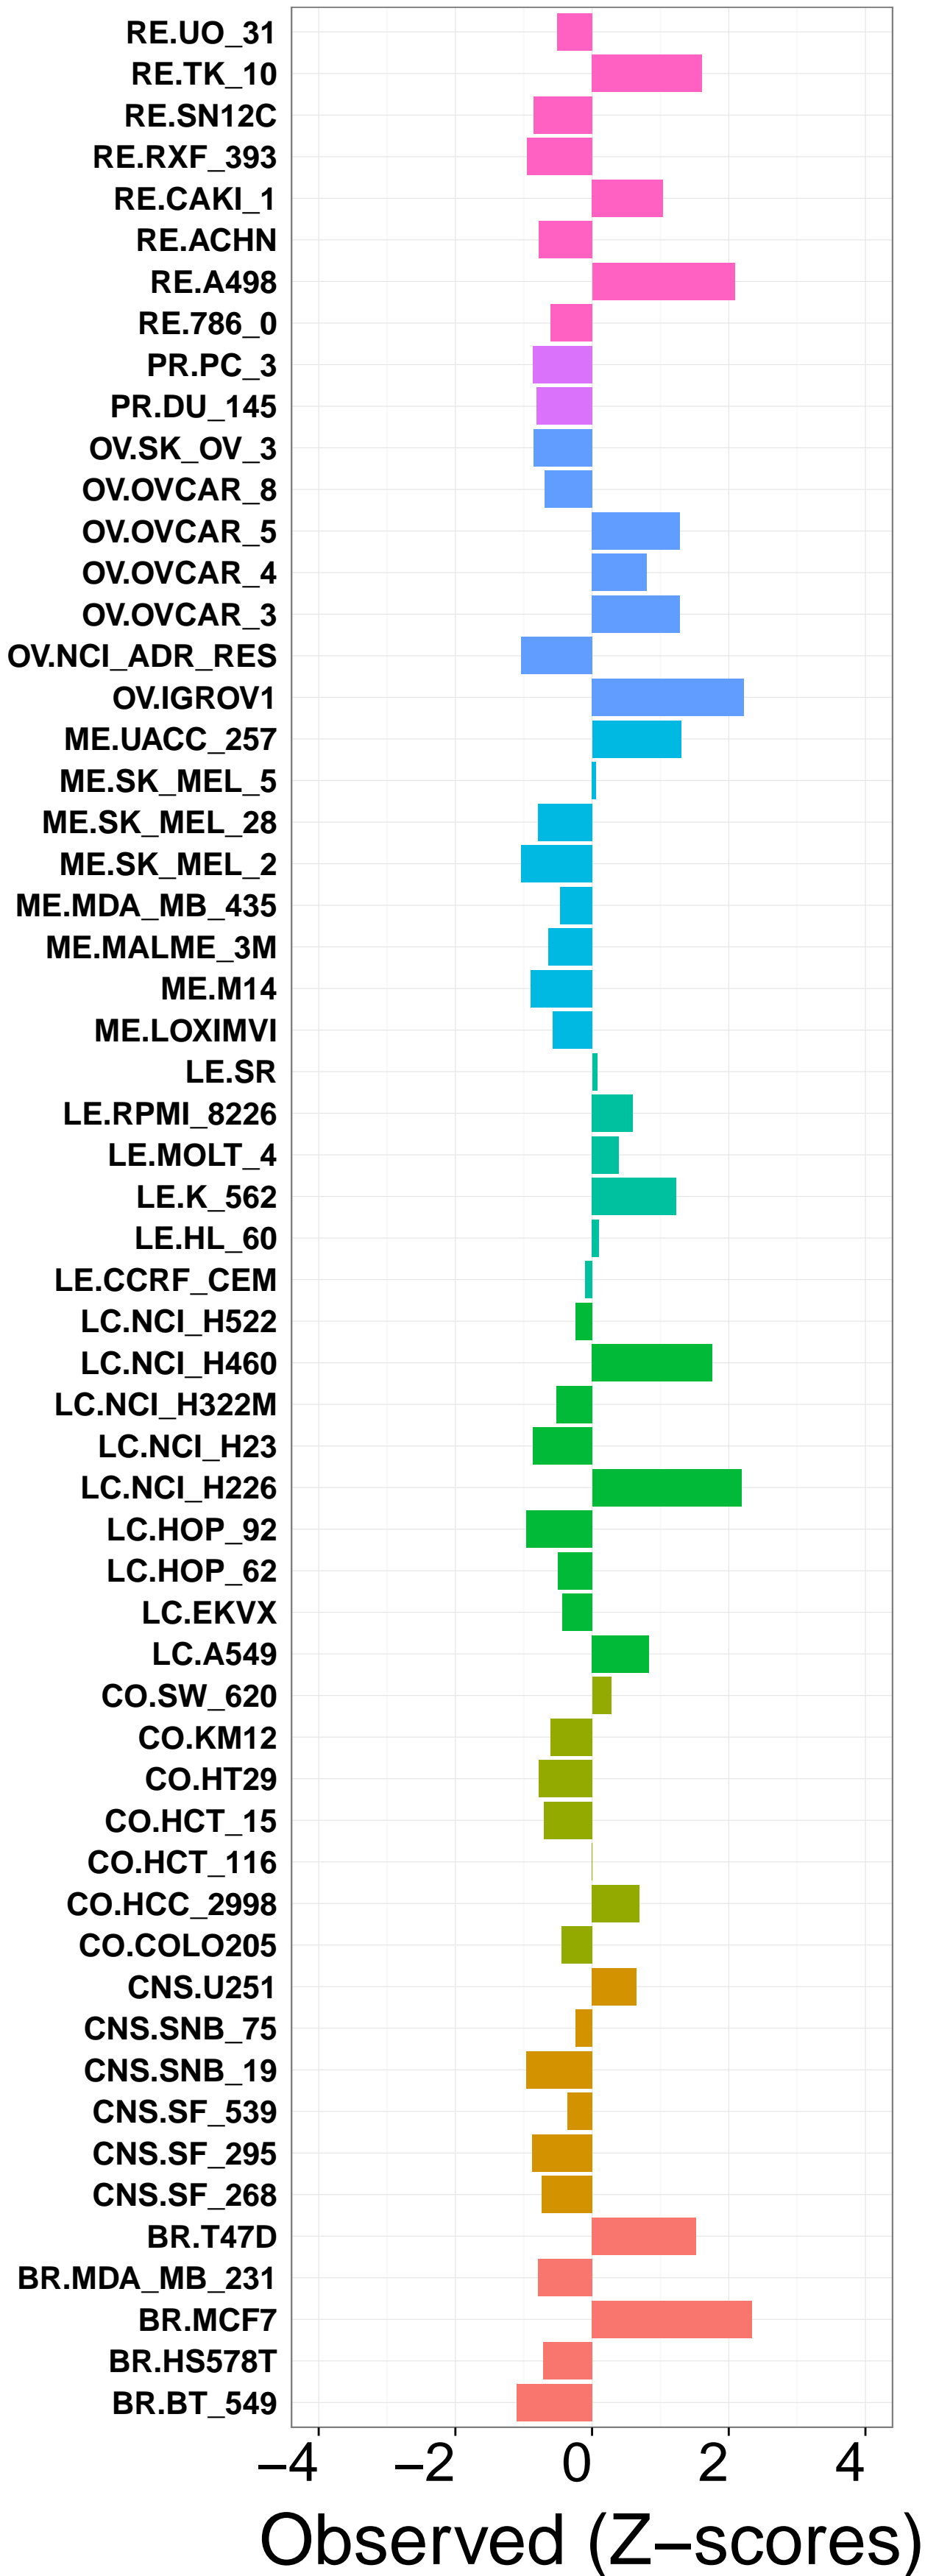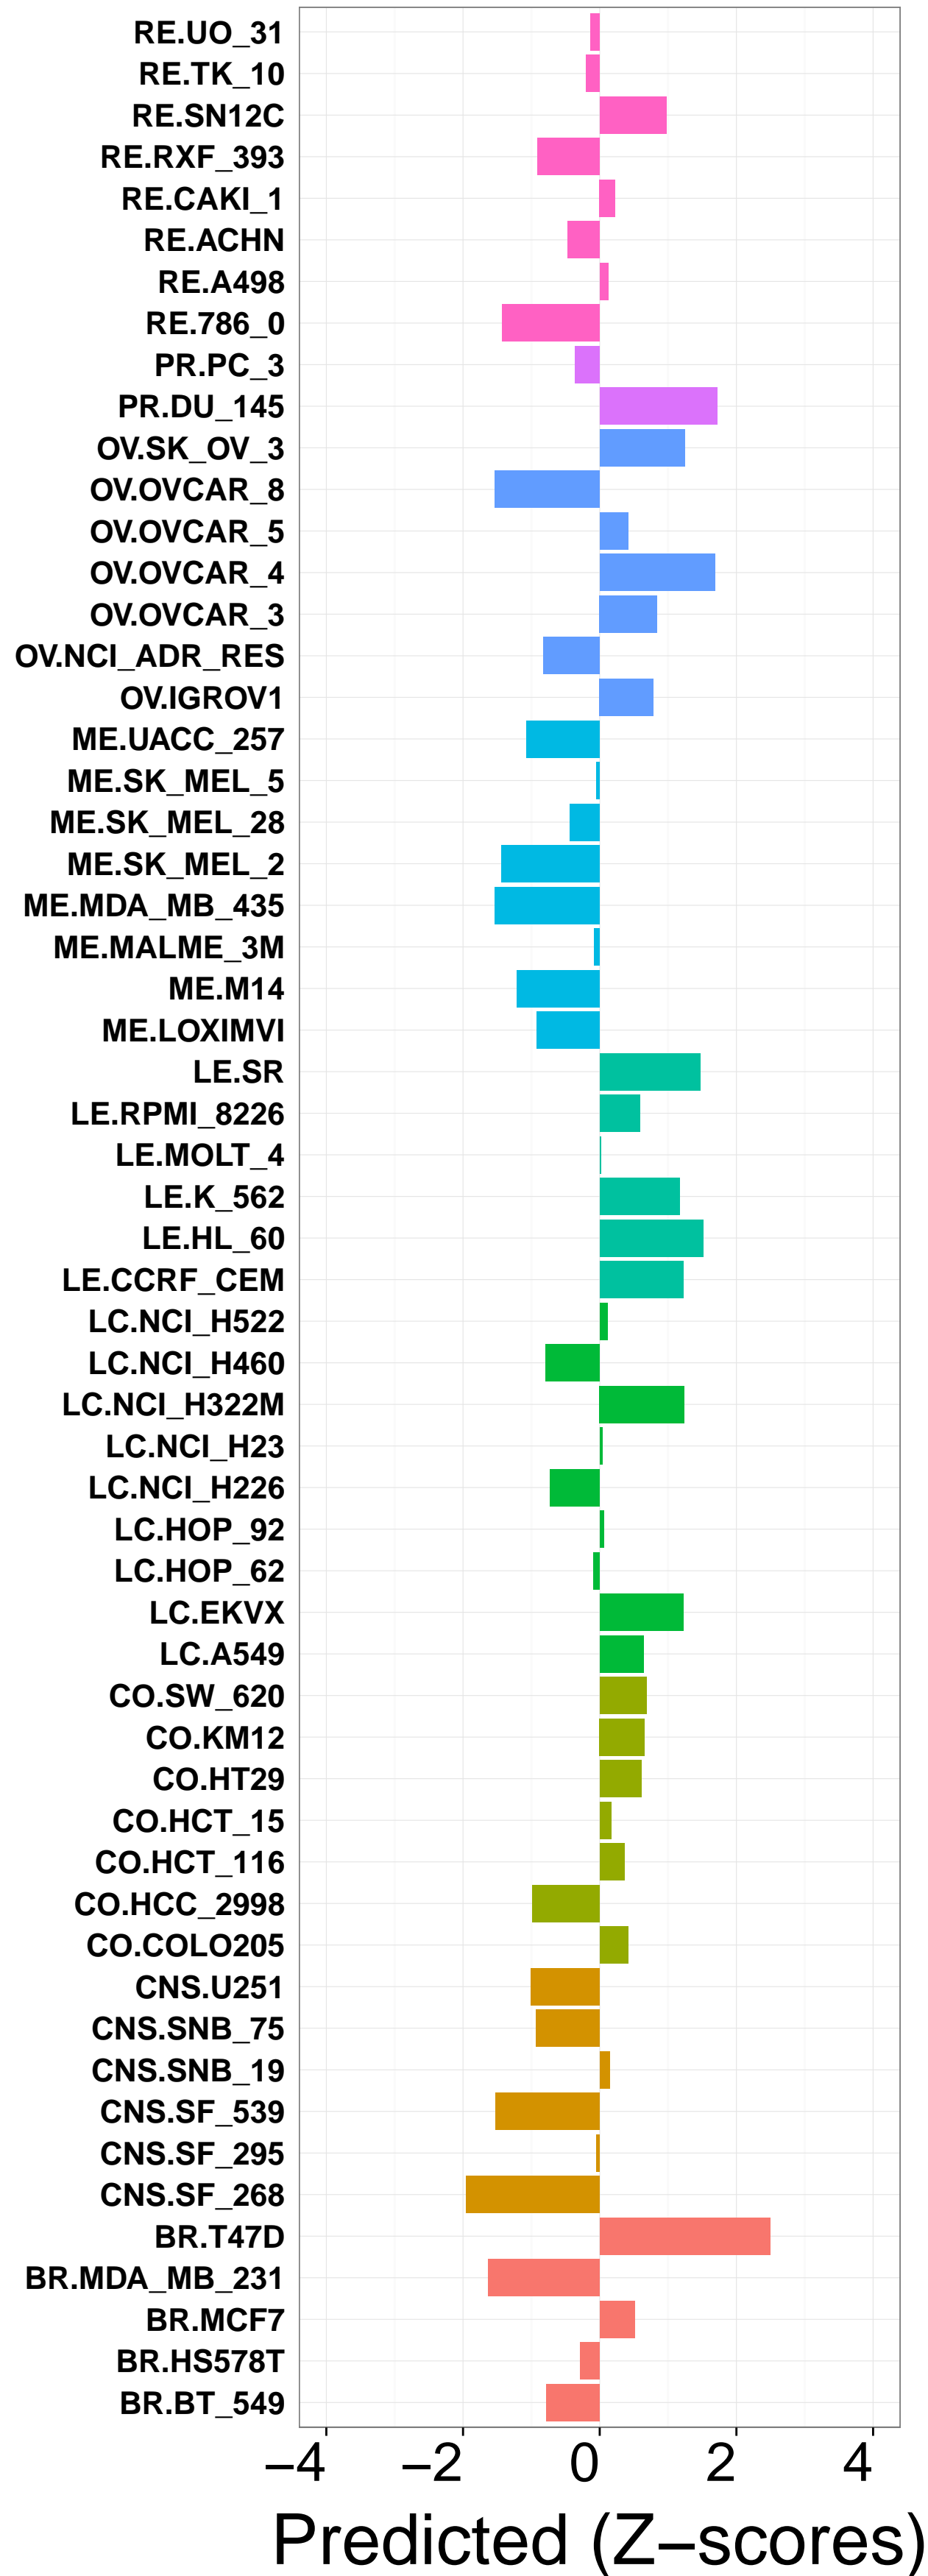

# NSC 715055, Gefitinib (LOCO)

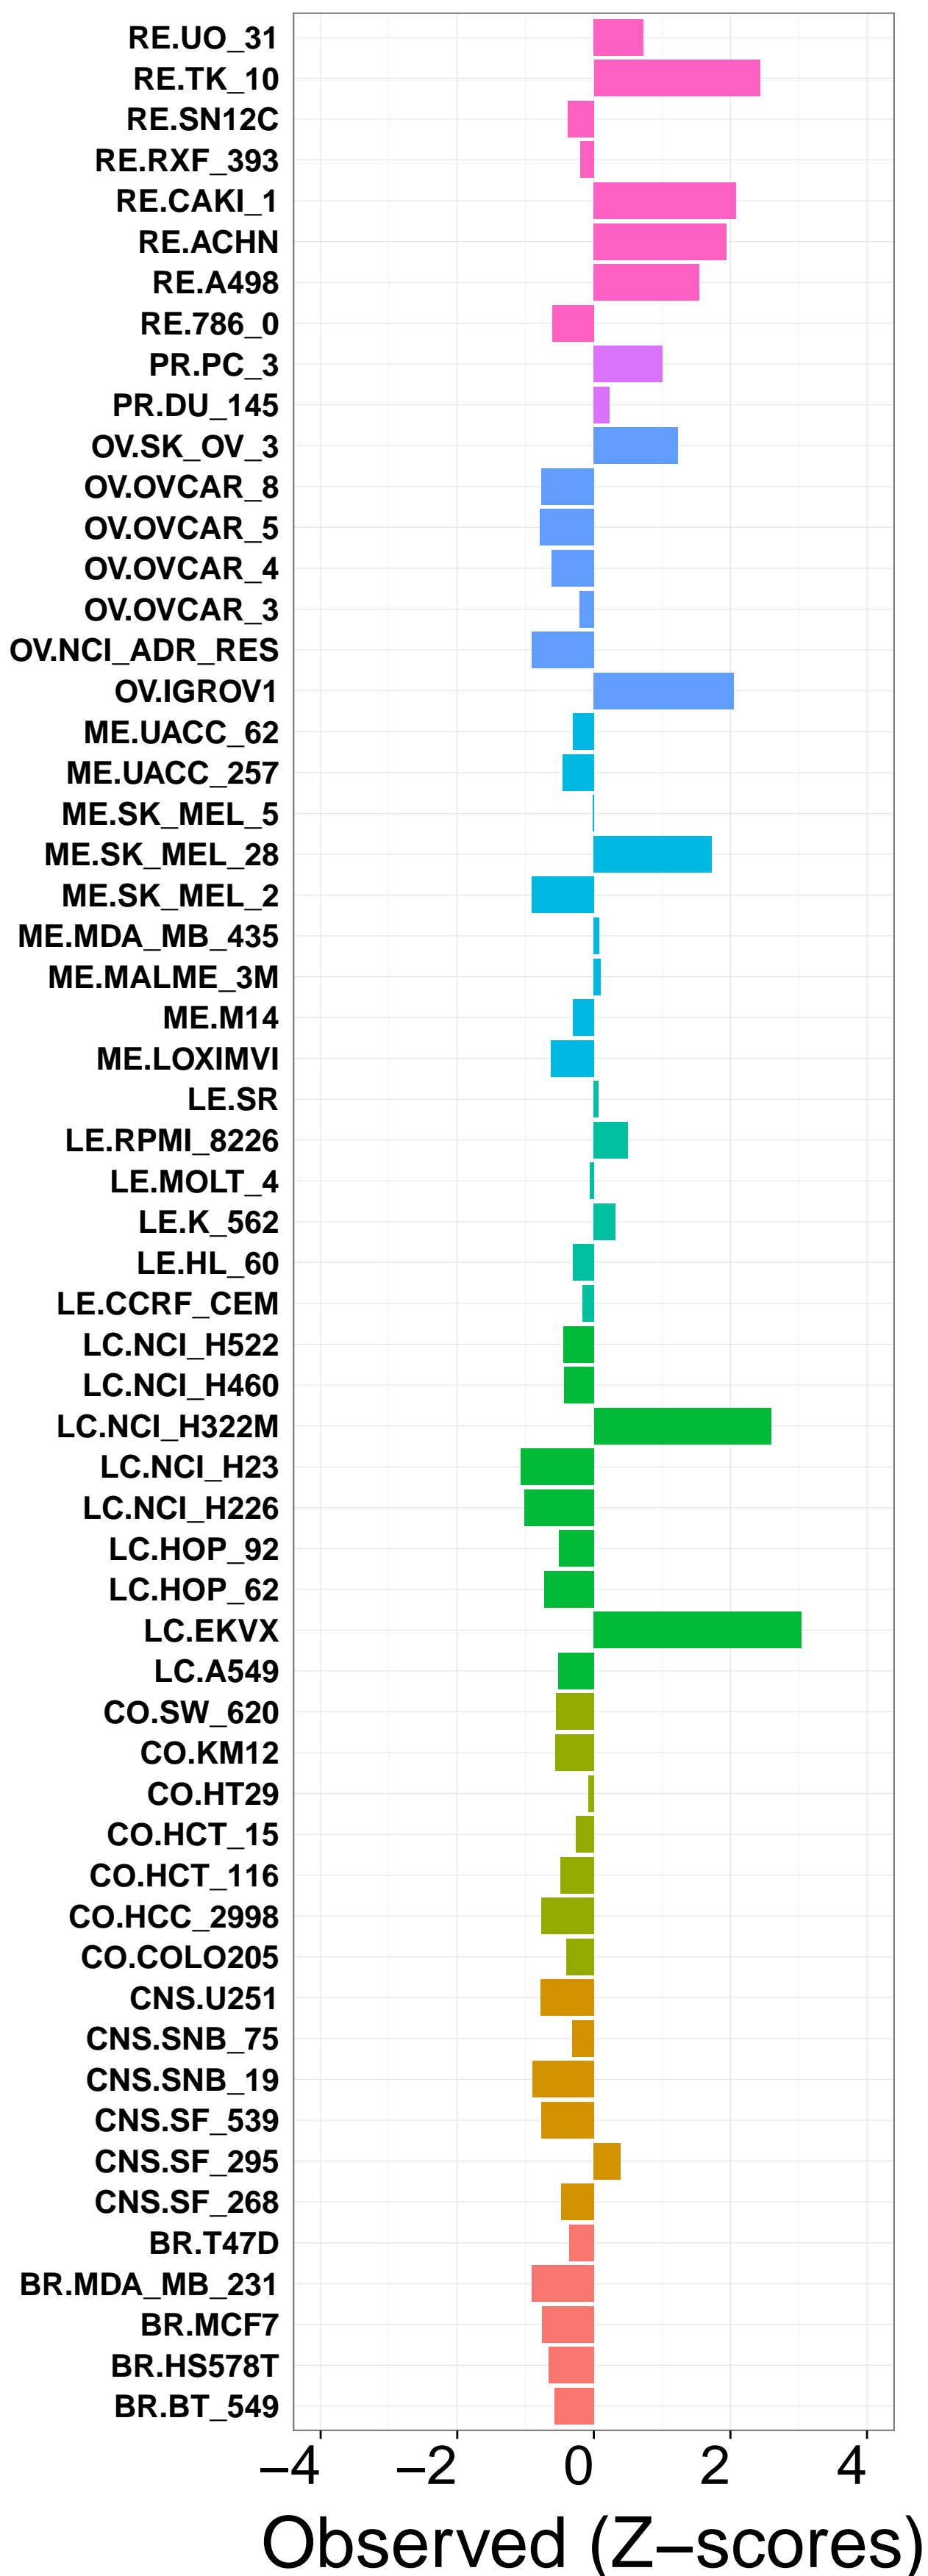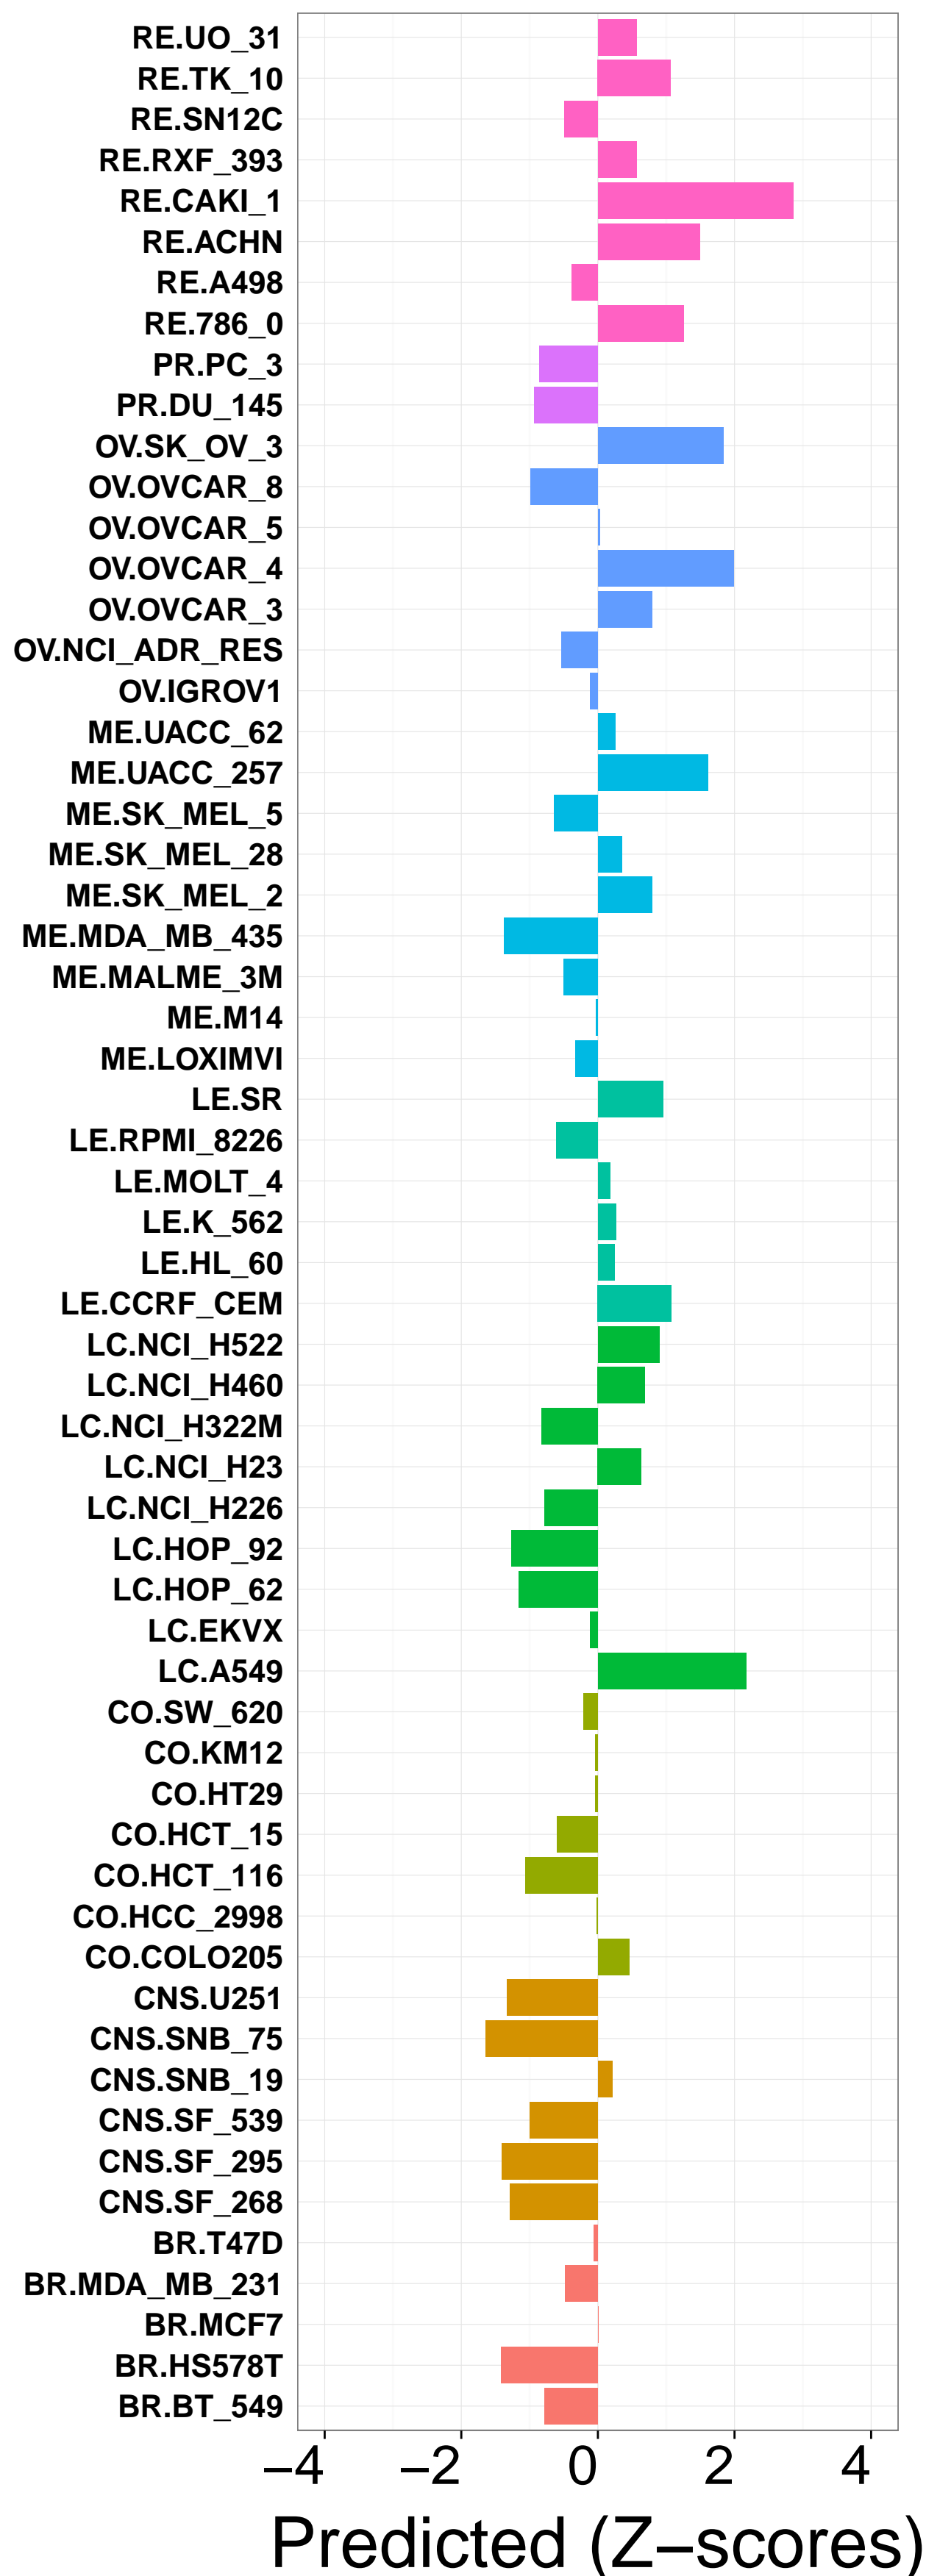

# NSC 718781, (LOCO)

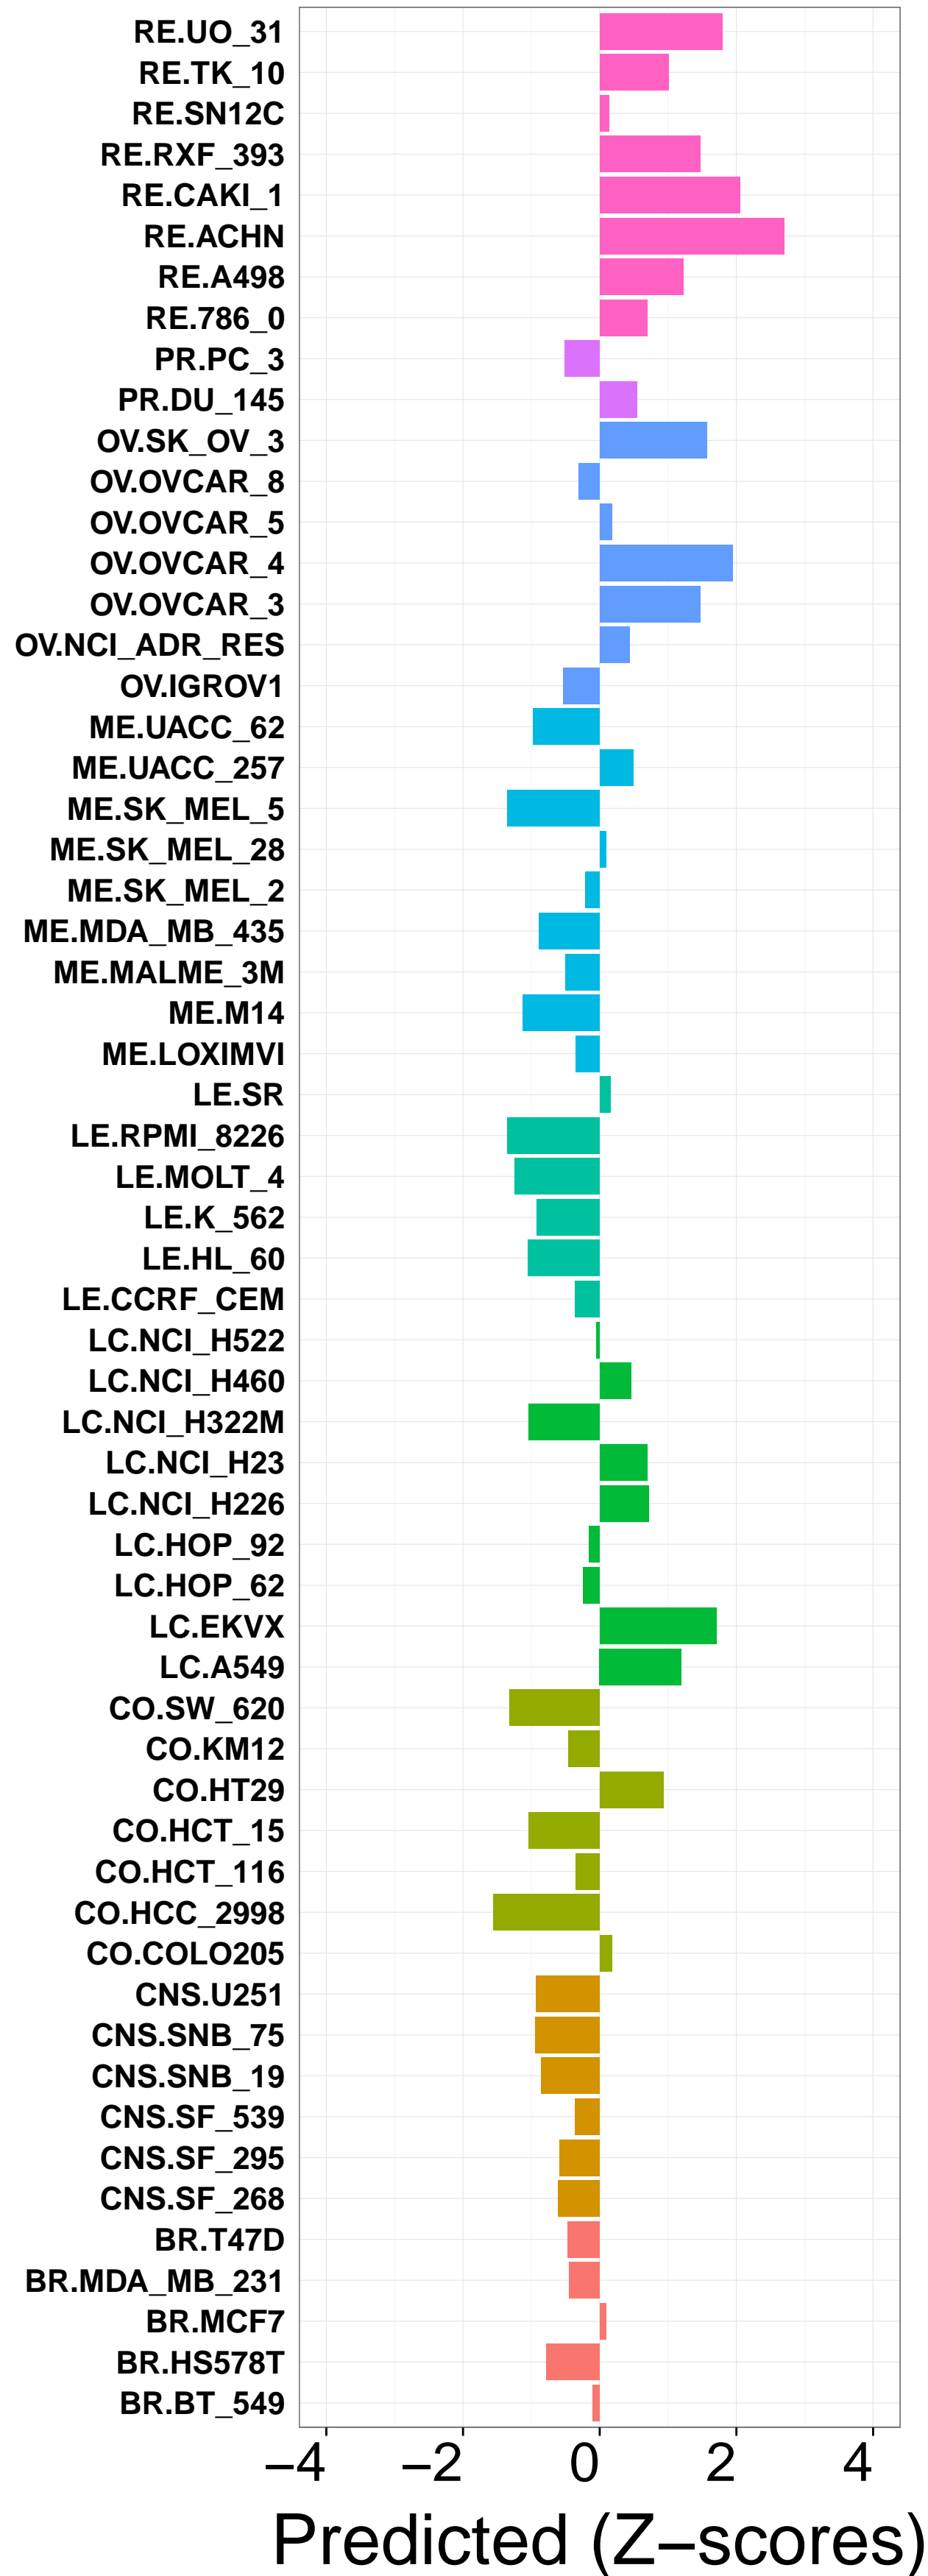

# NSC 719239, (LOCO)

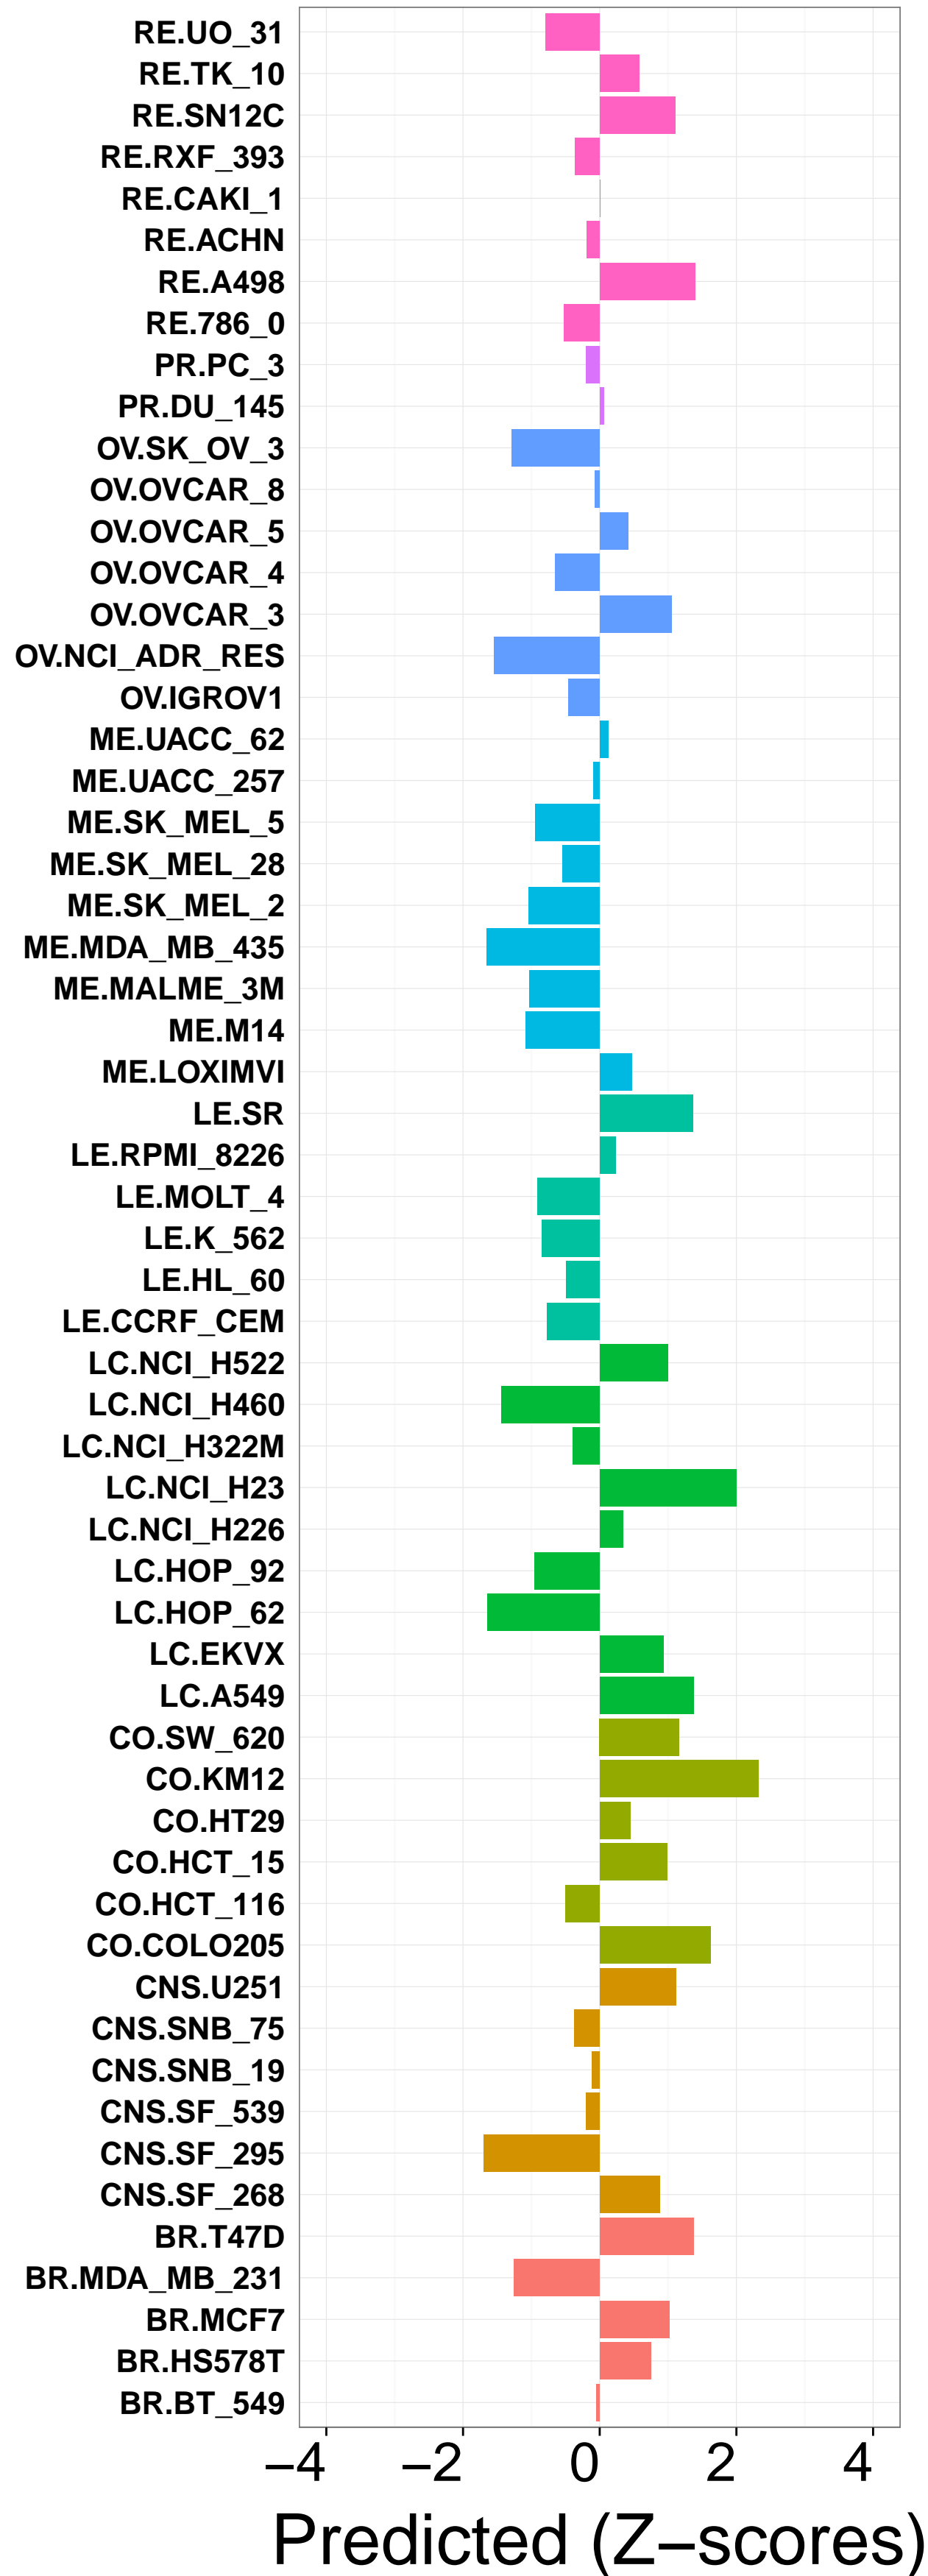

# NSC 724998, (LOCO)

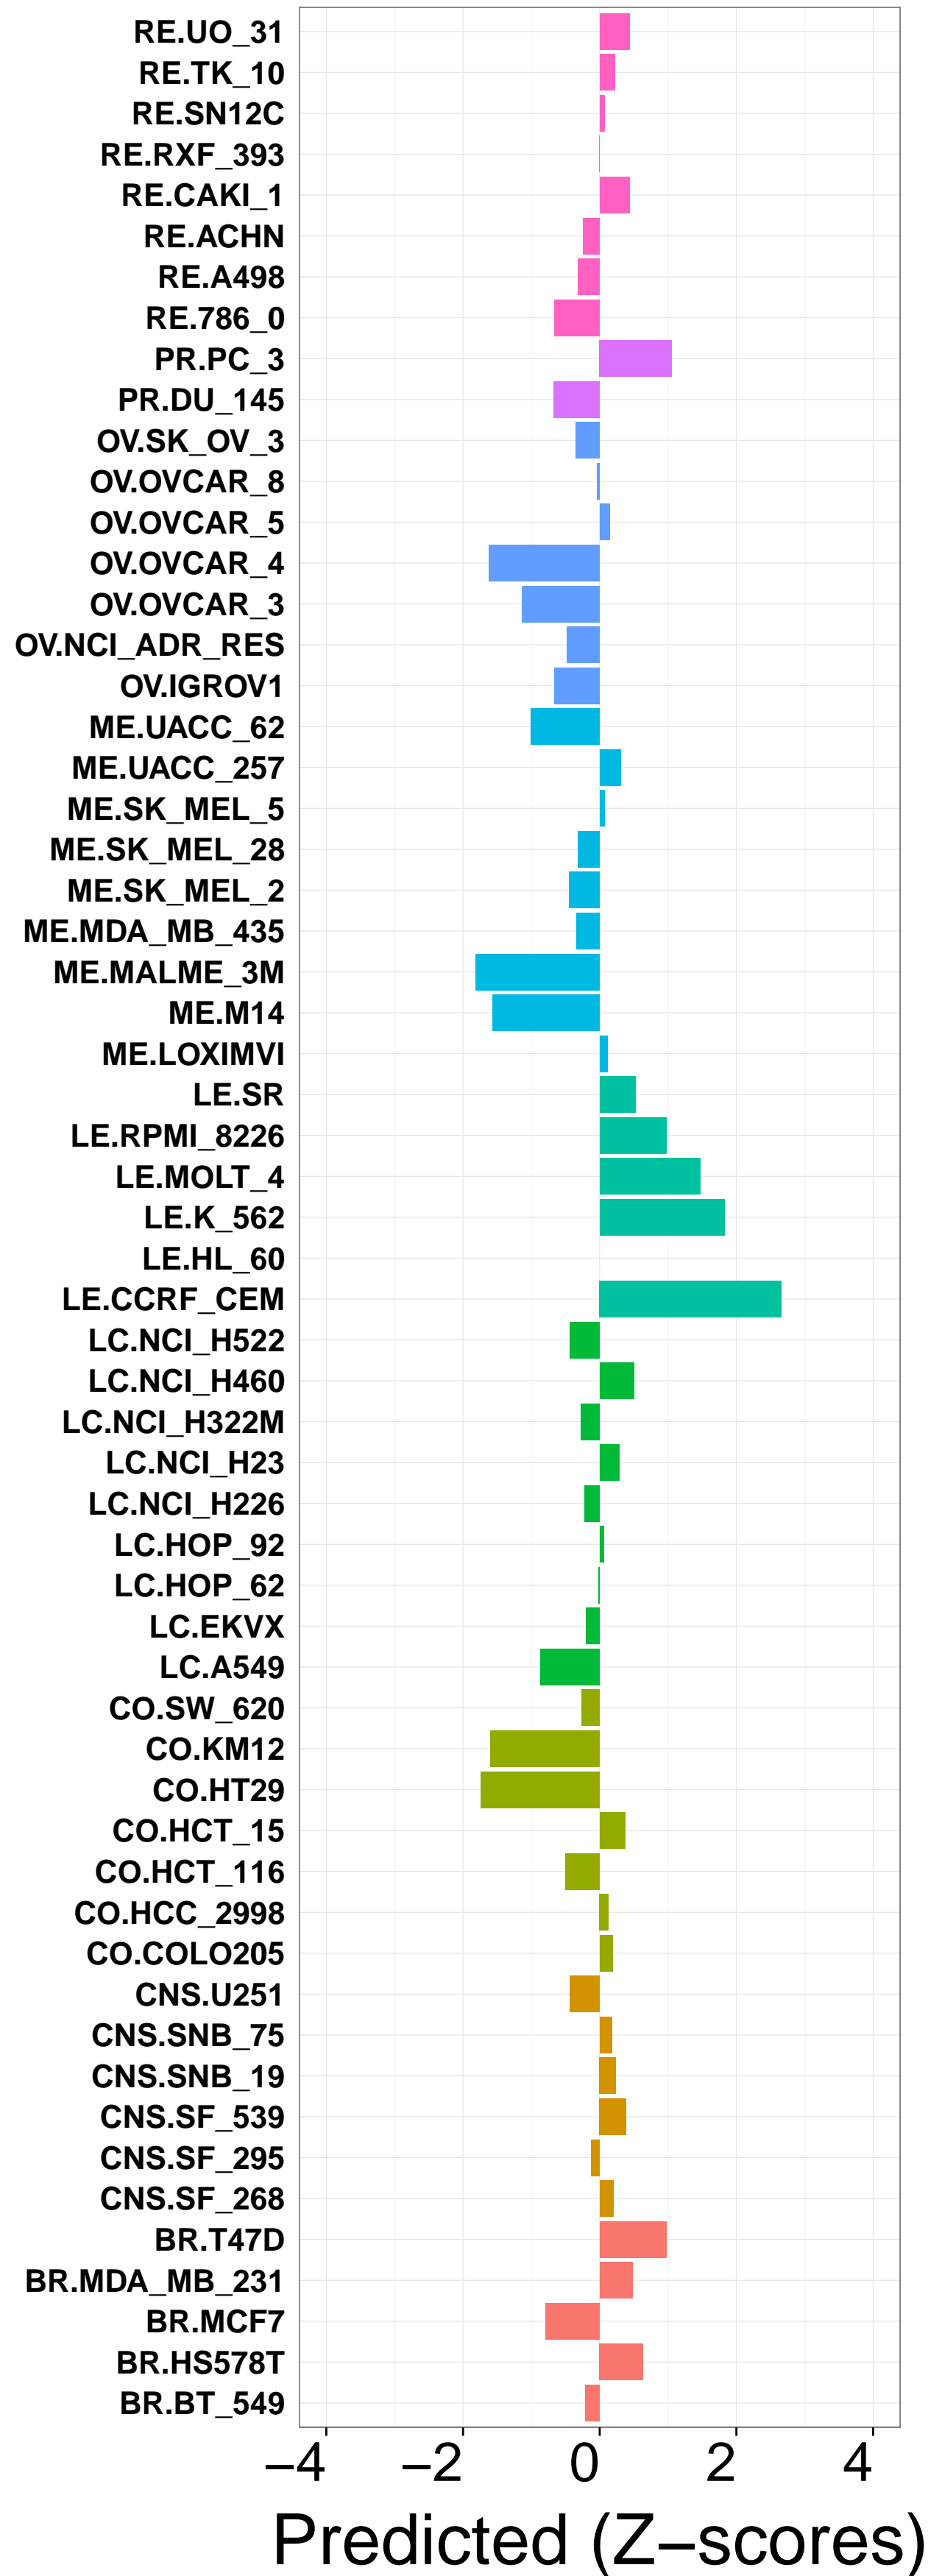



# NSC 725776, (LOCO)

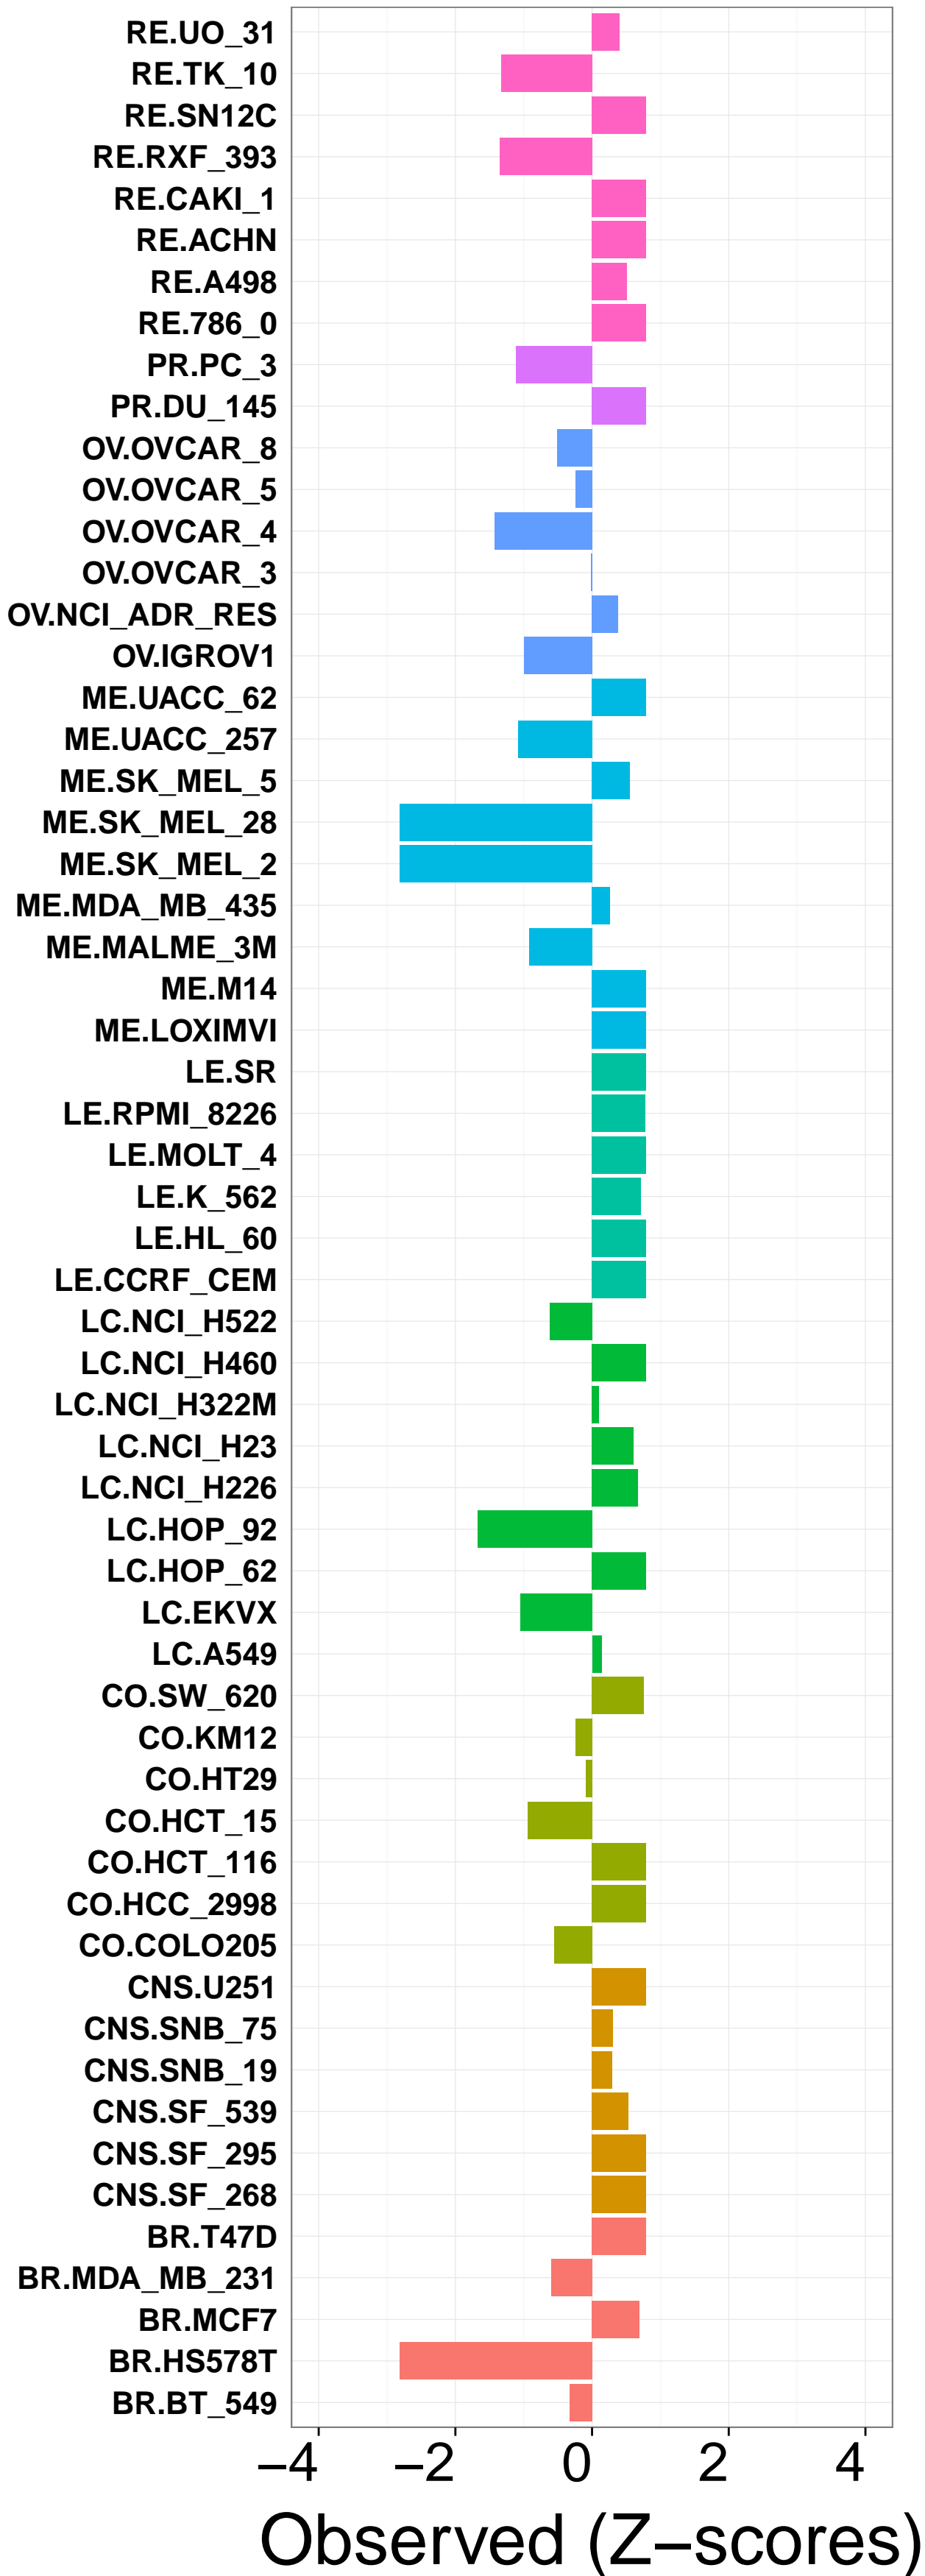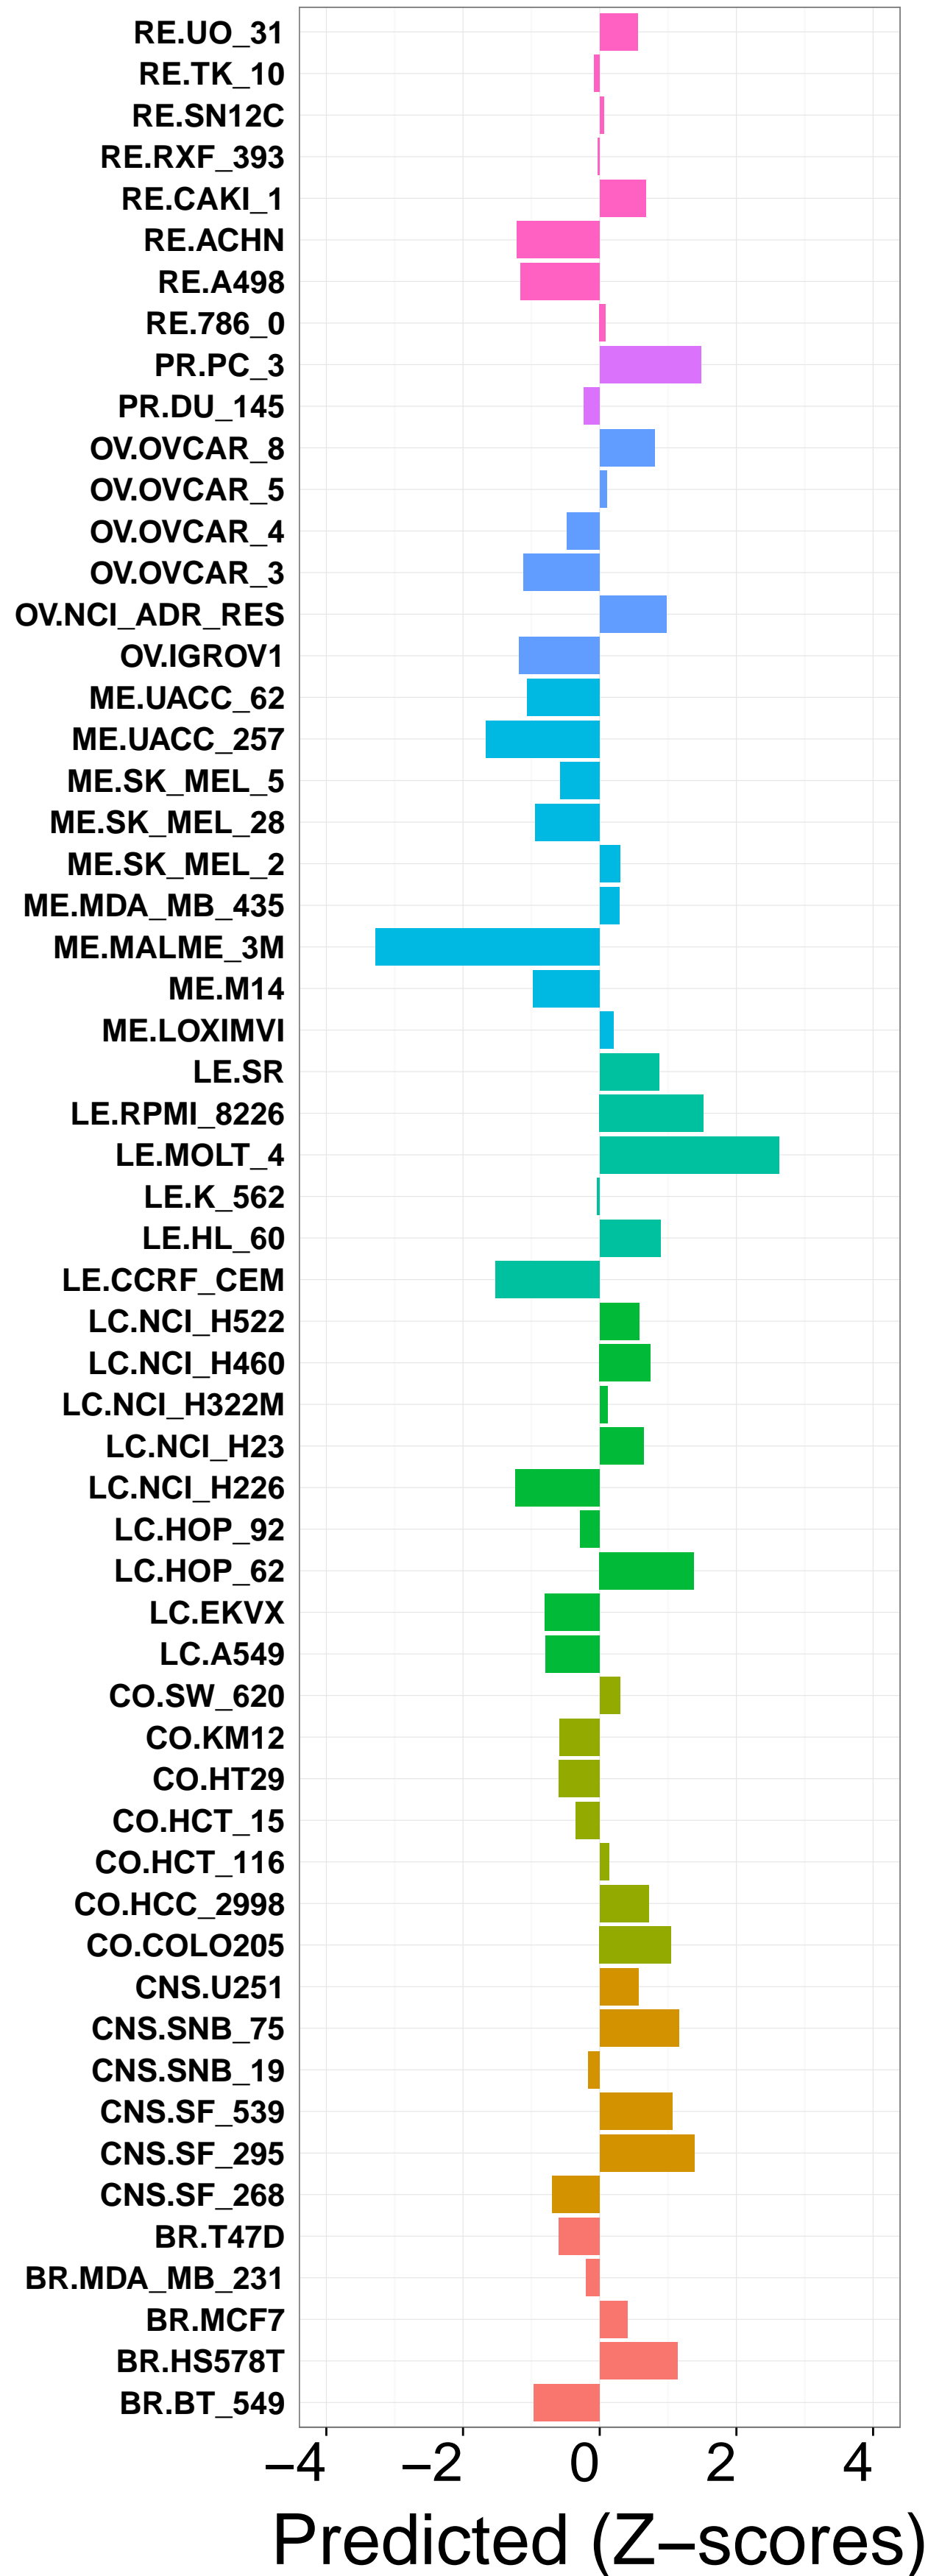

# NSC 726630, (LOCO)

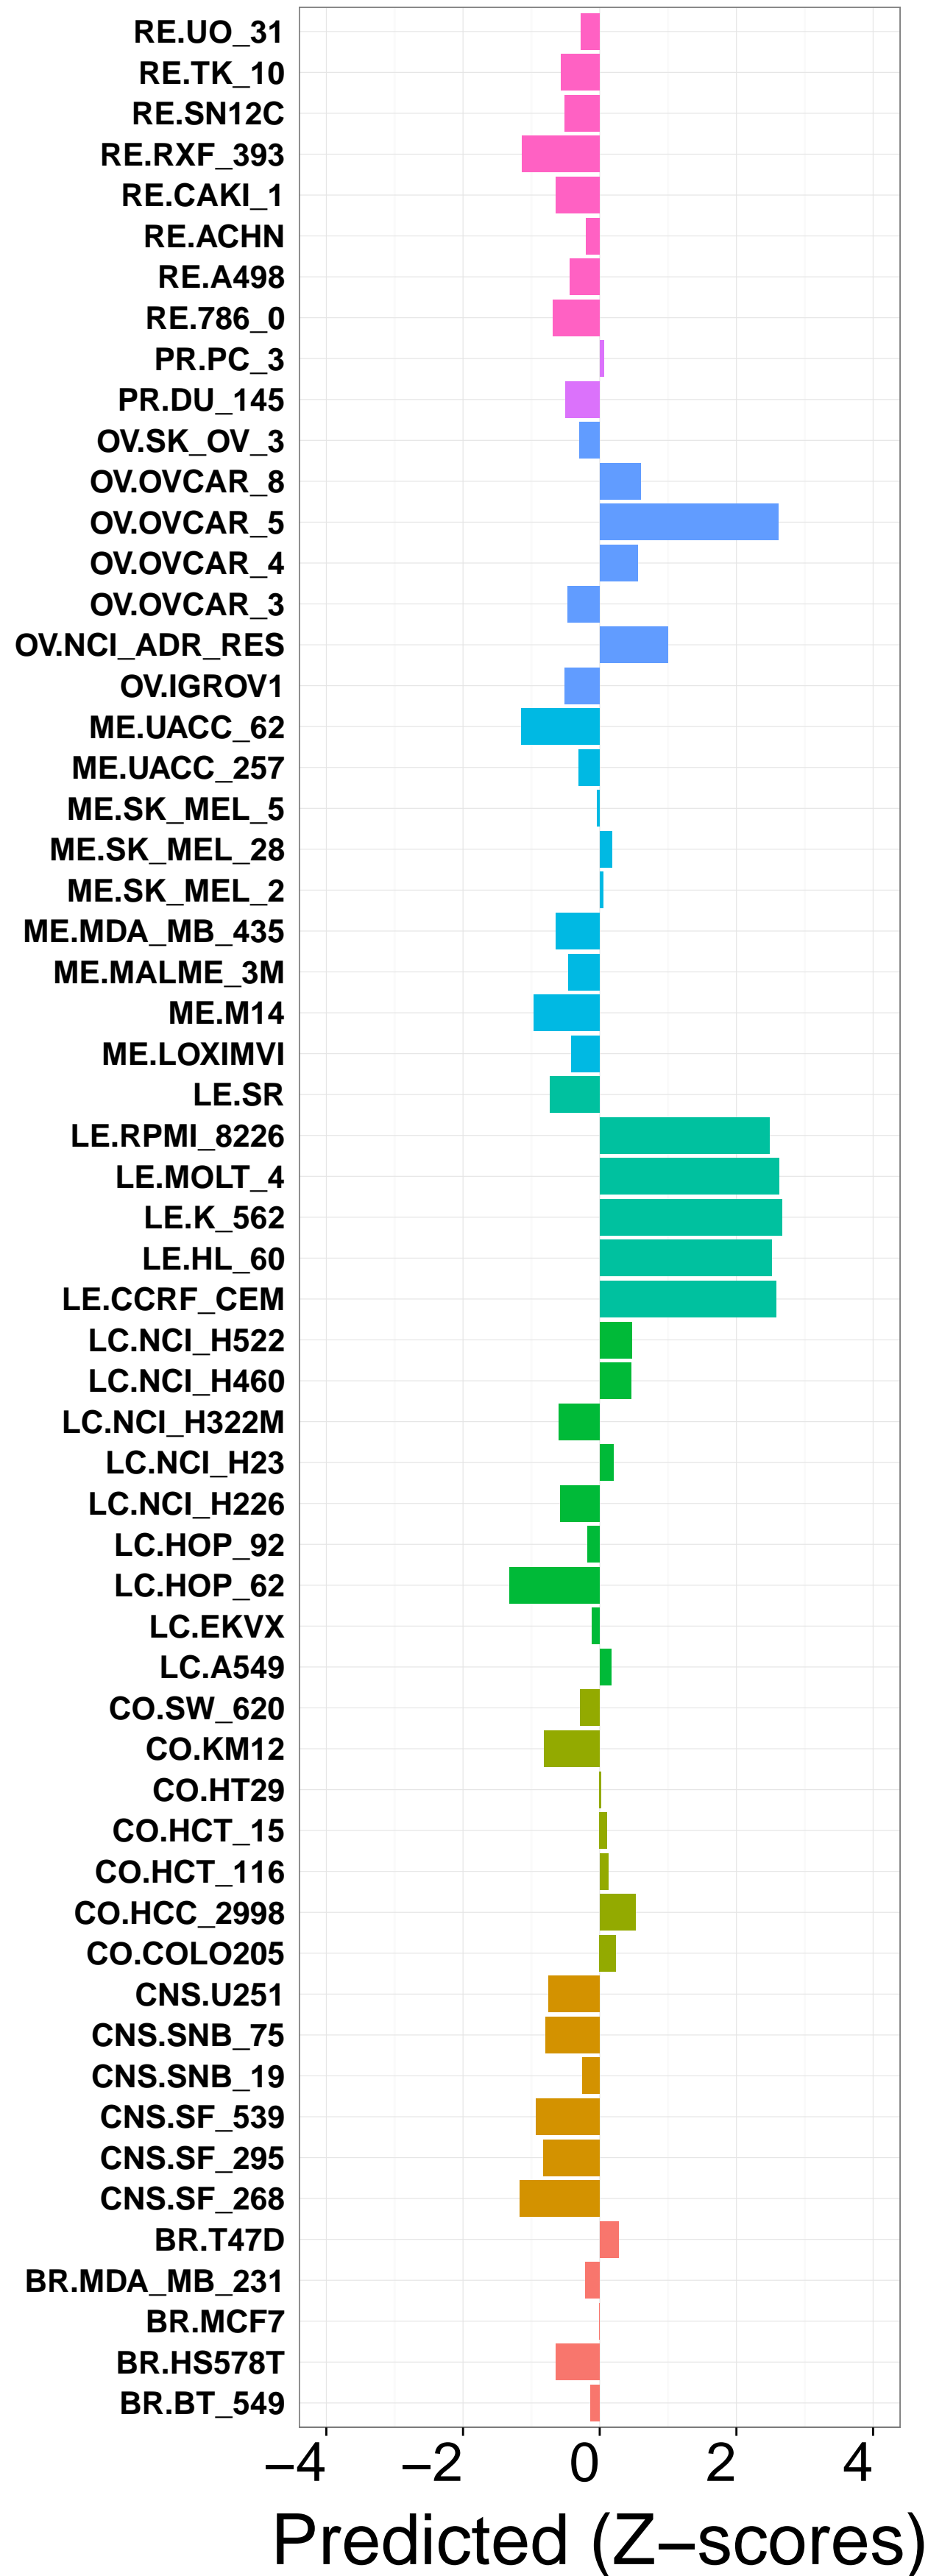

# NSC 728073, (LOCO)

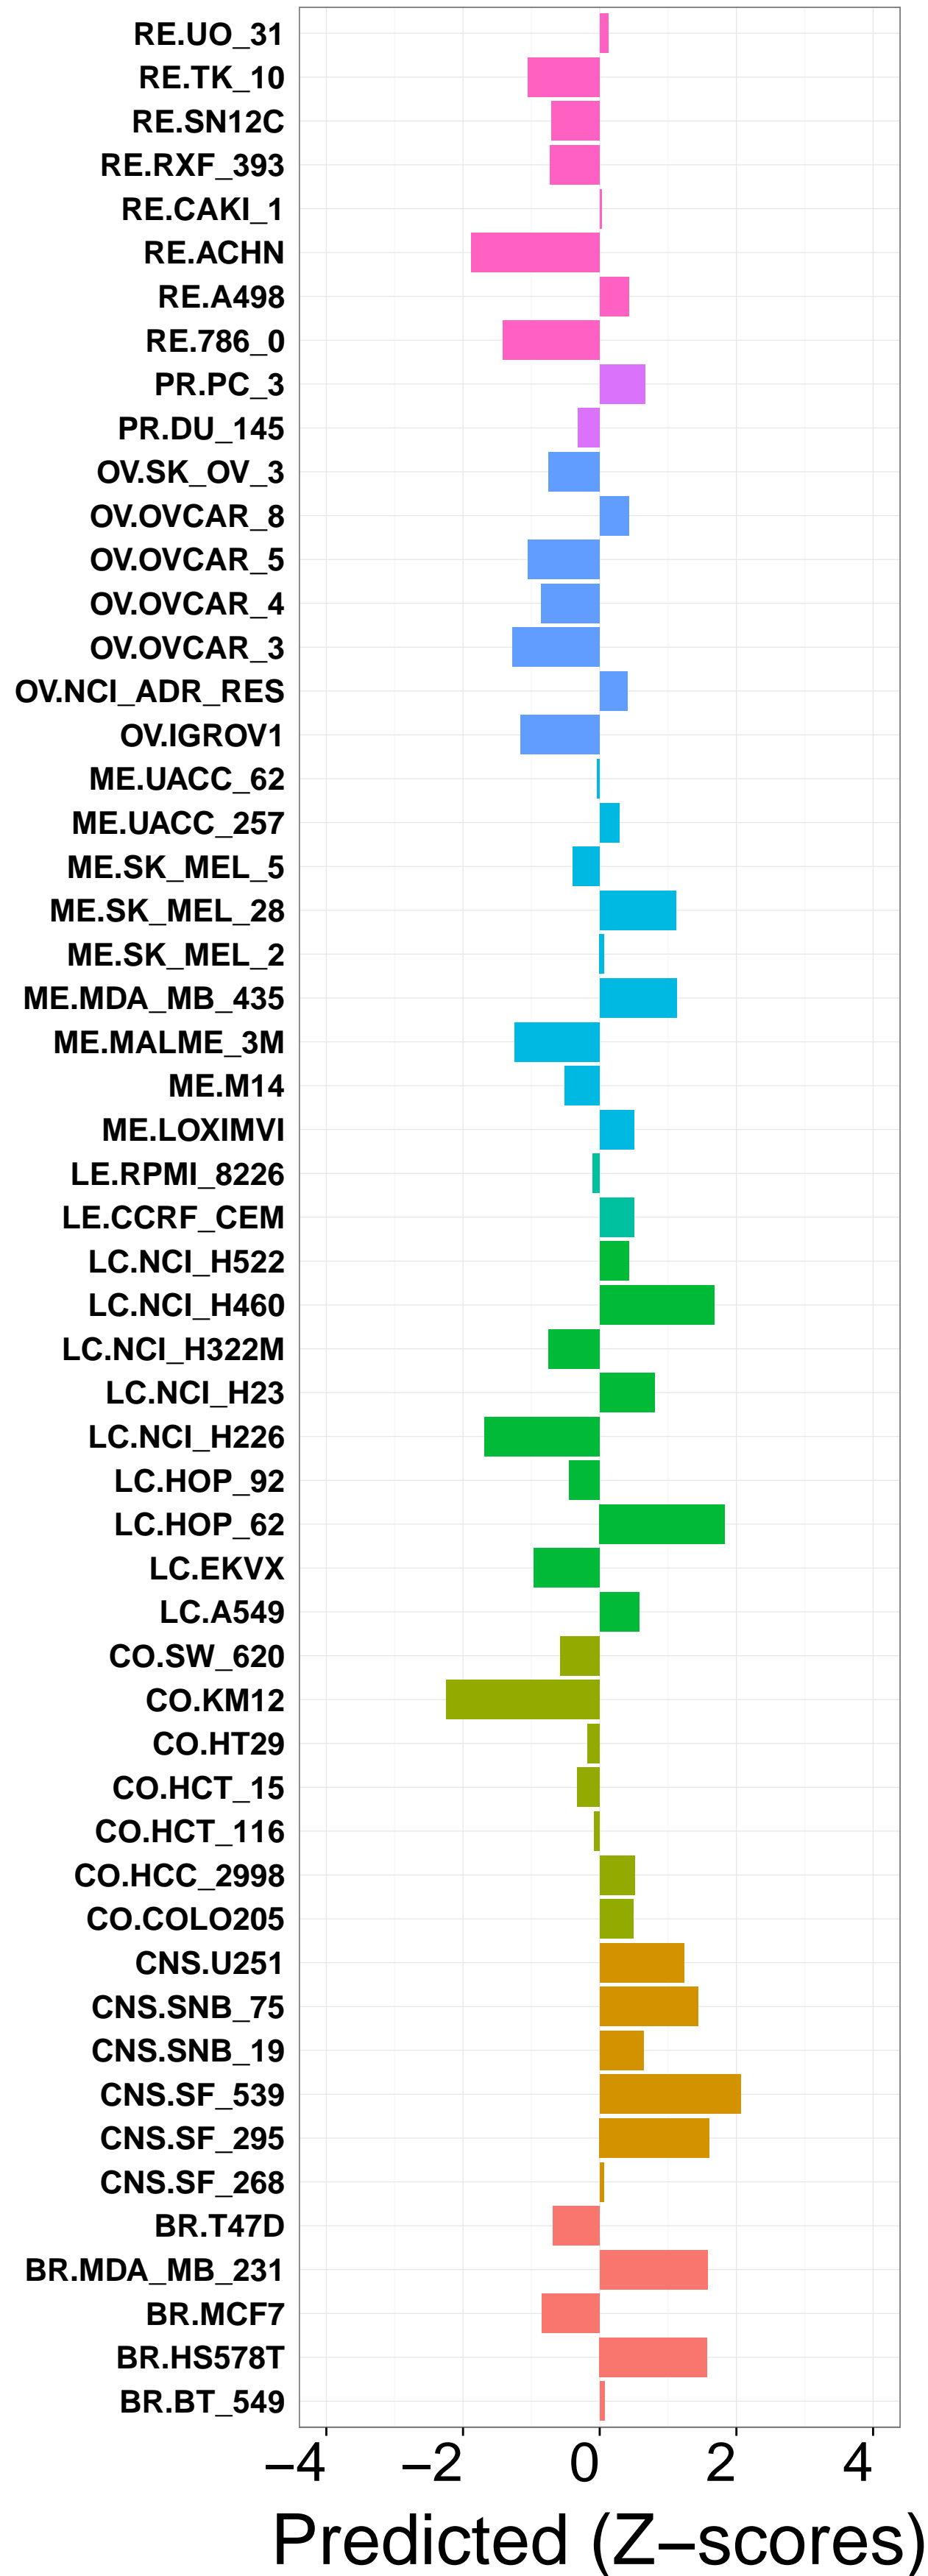

# NSC 732517, (LOCO)

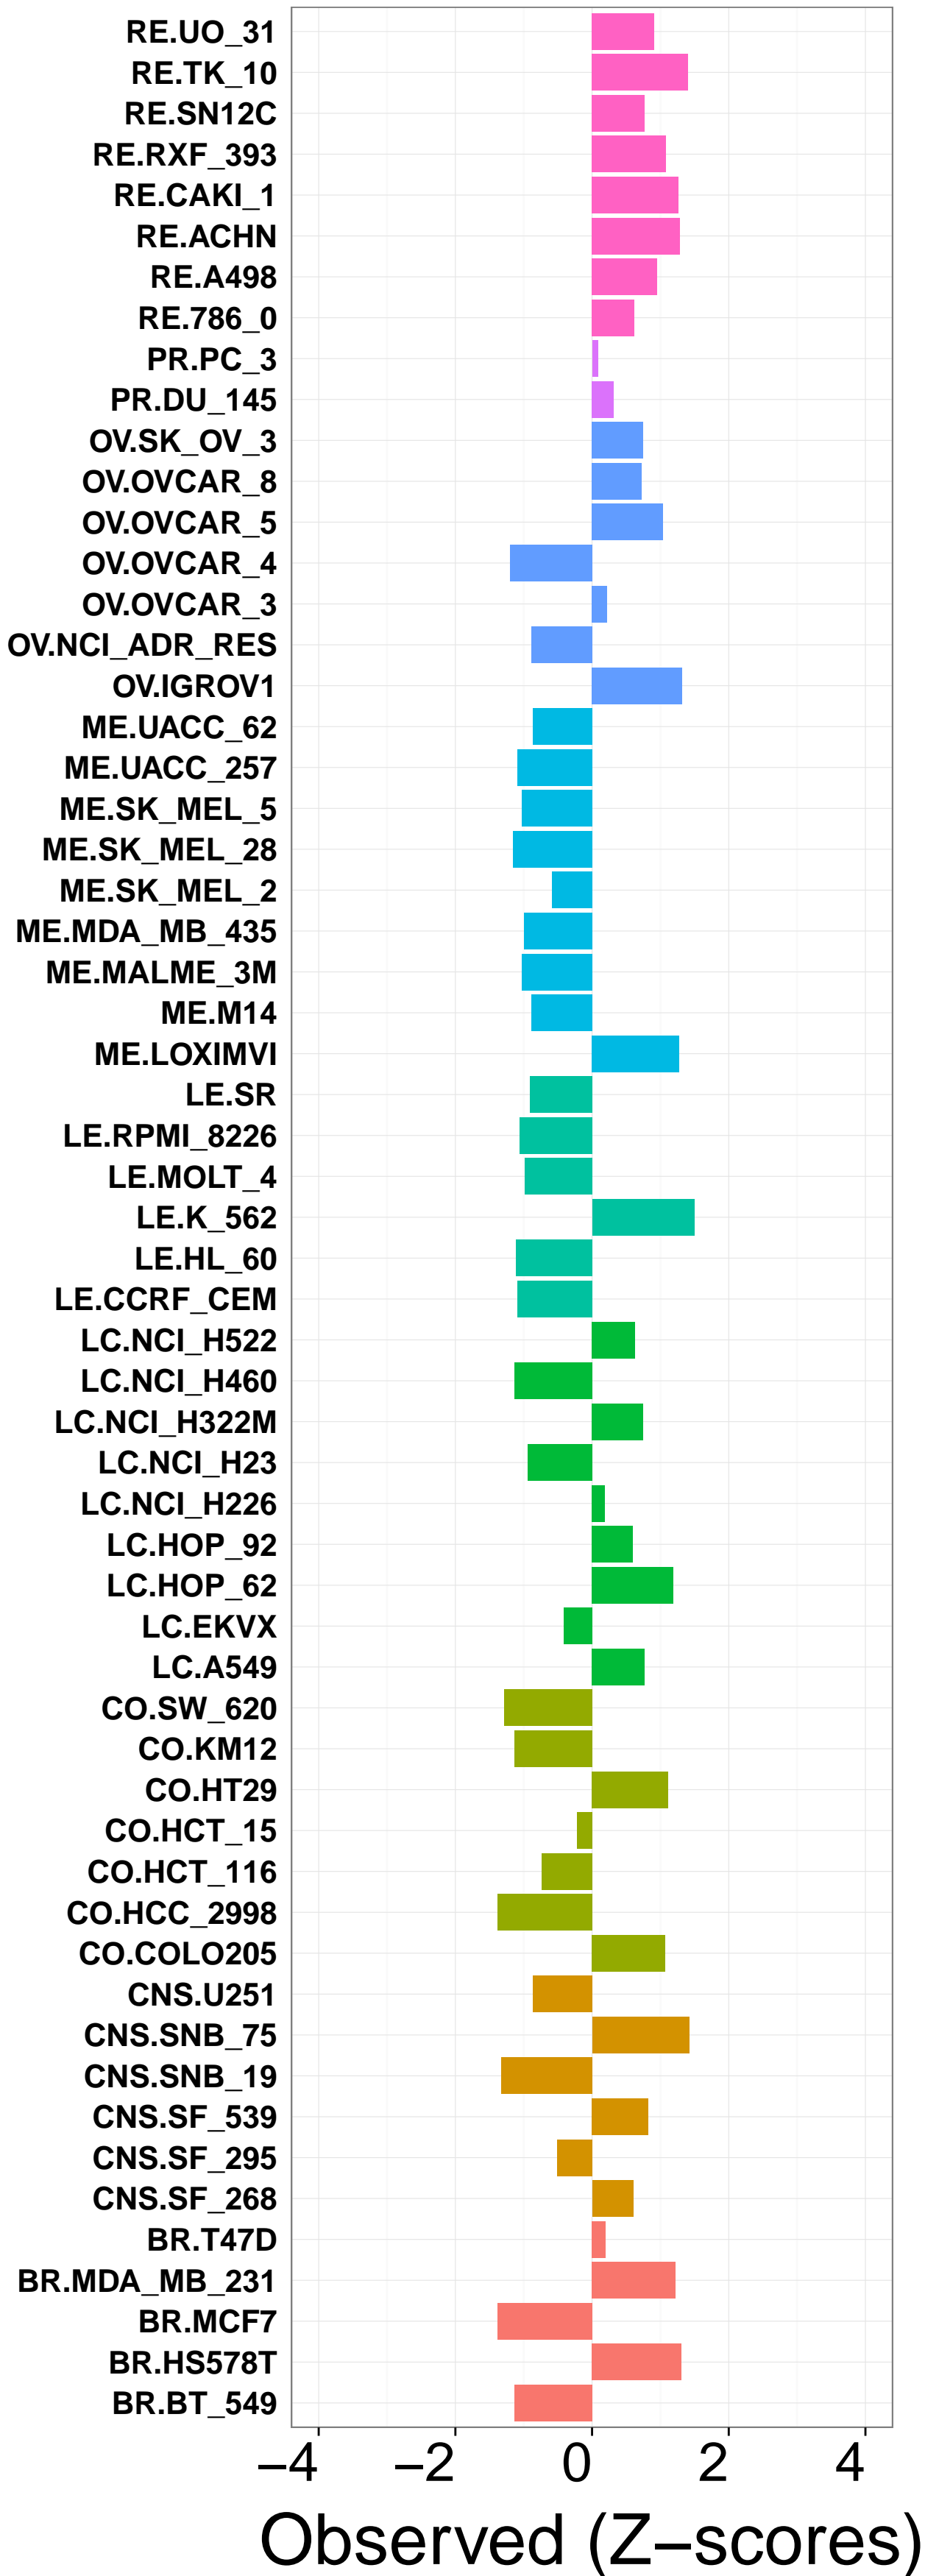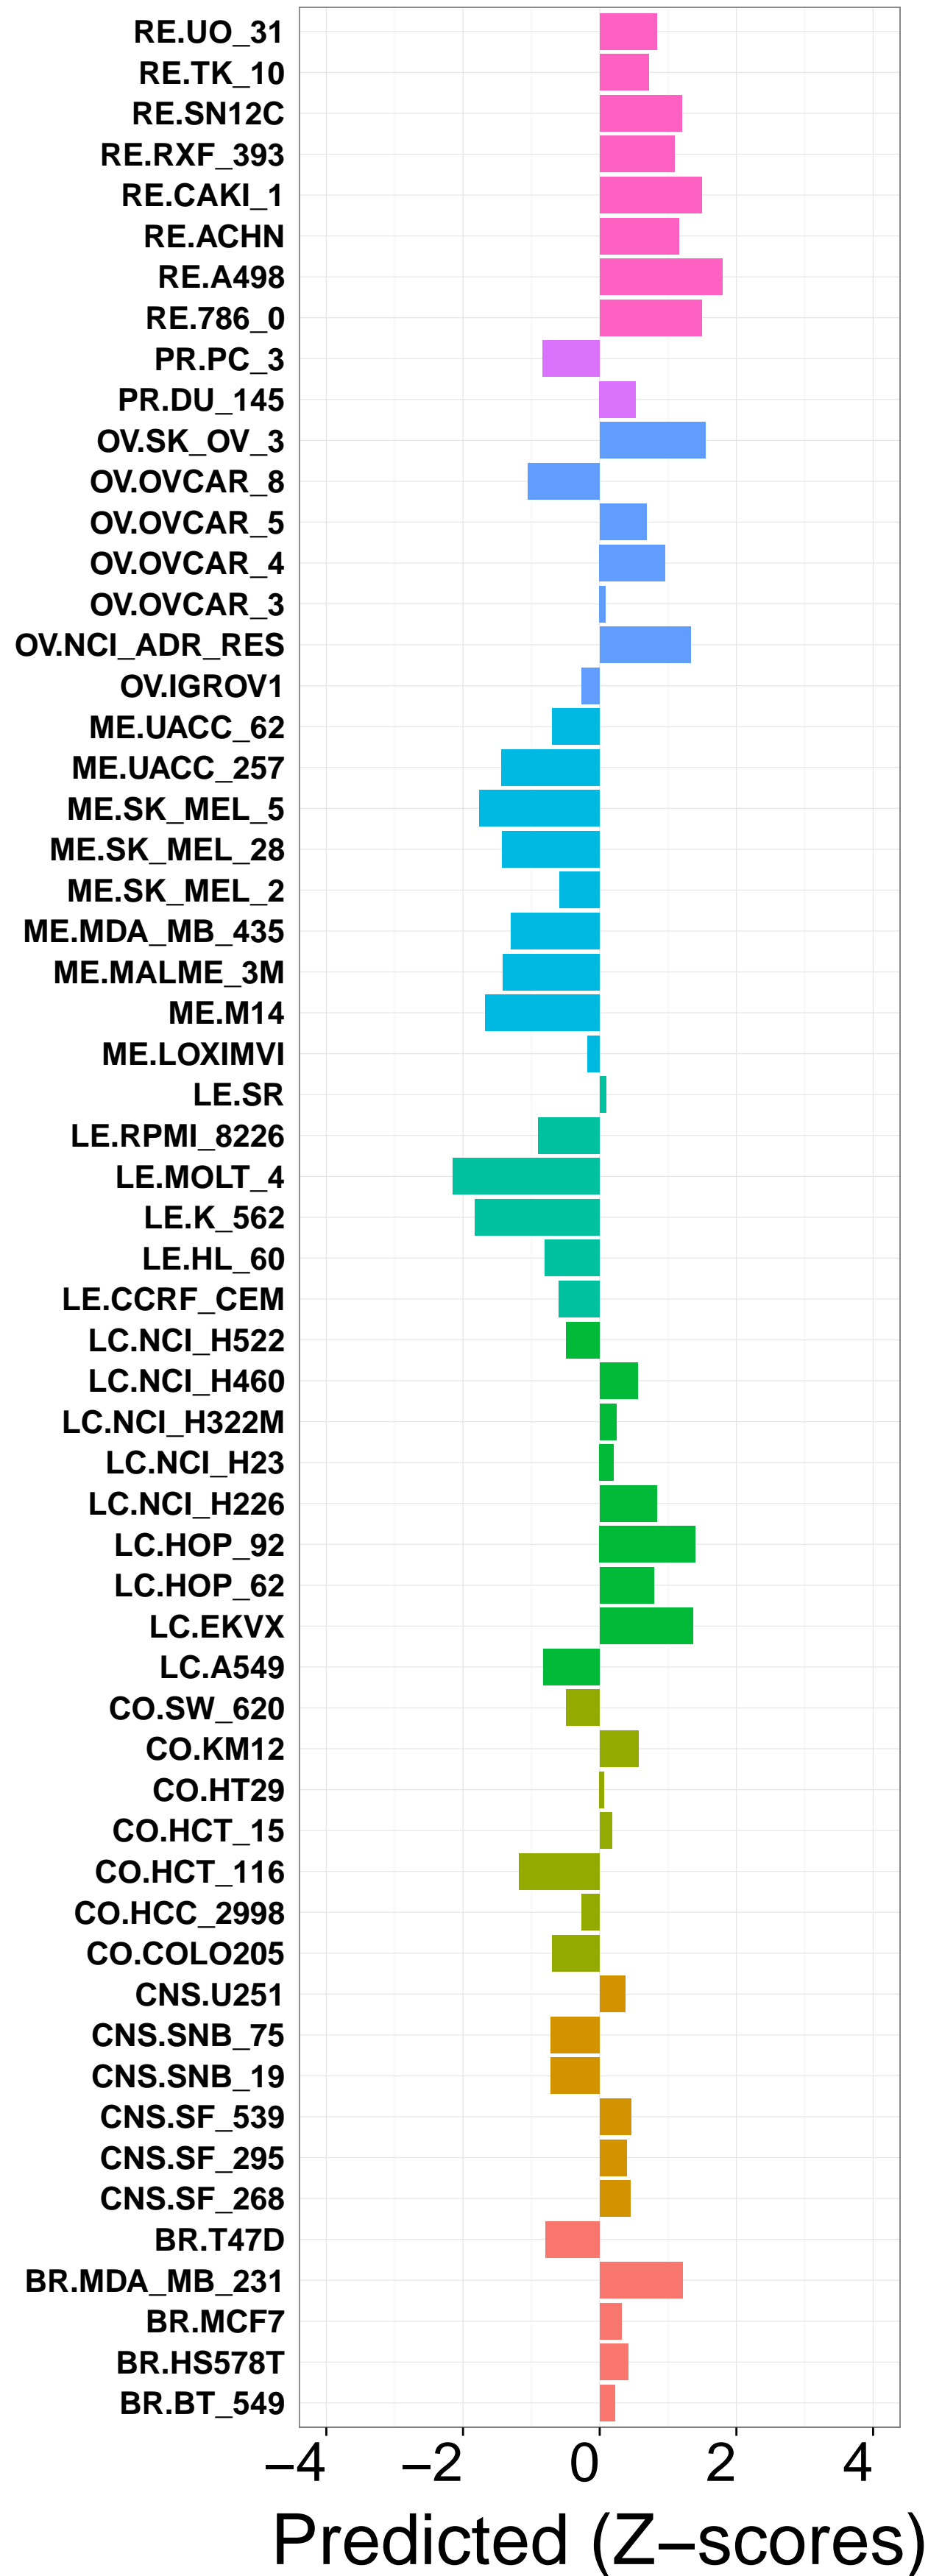

# NSC 740, Methotrexate (LOCO)

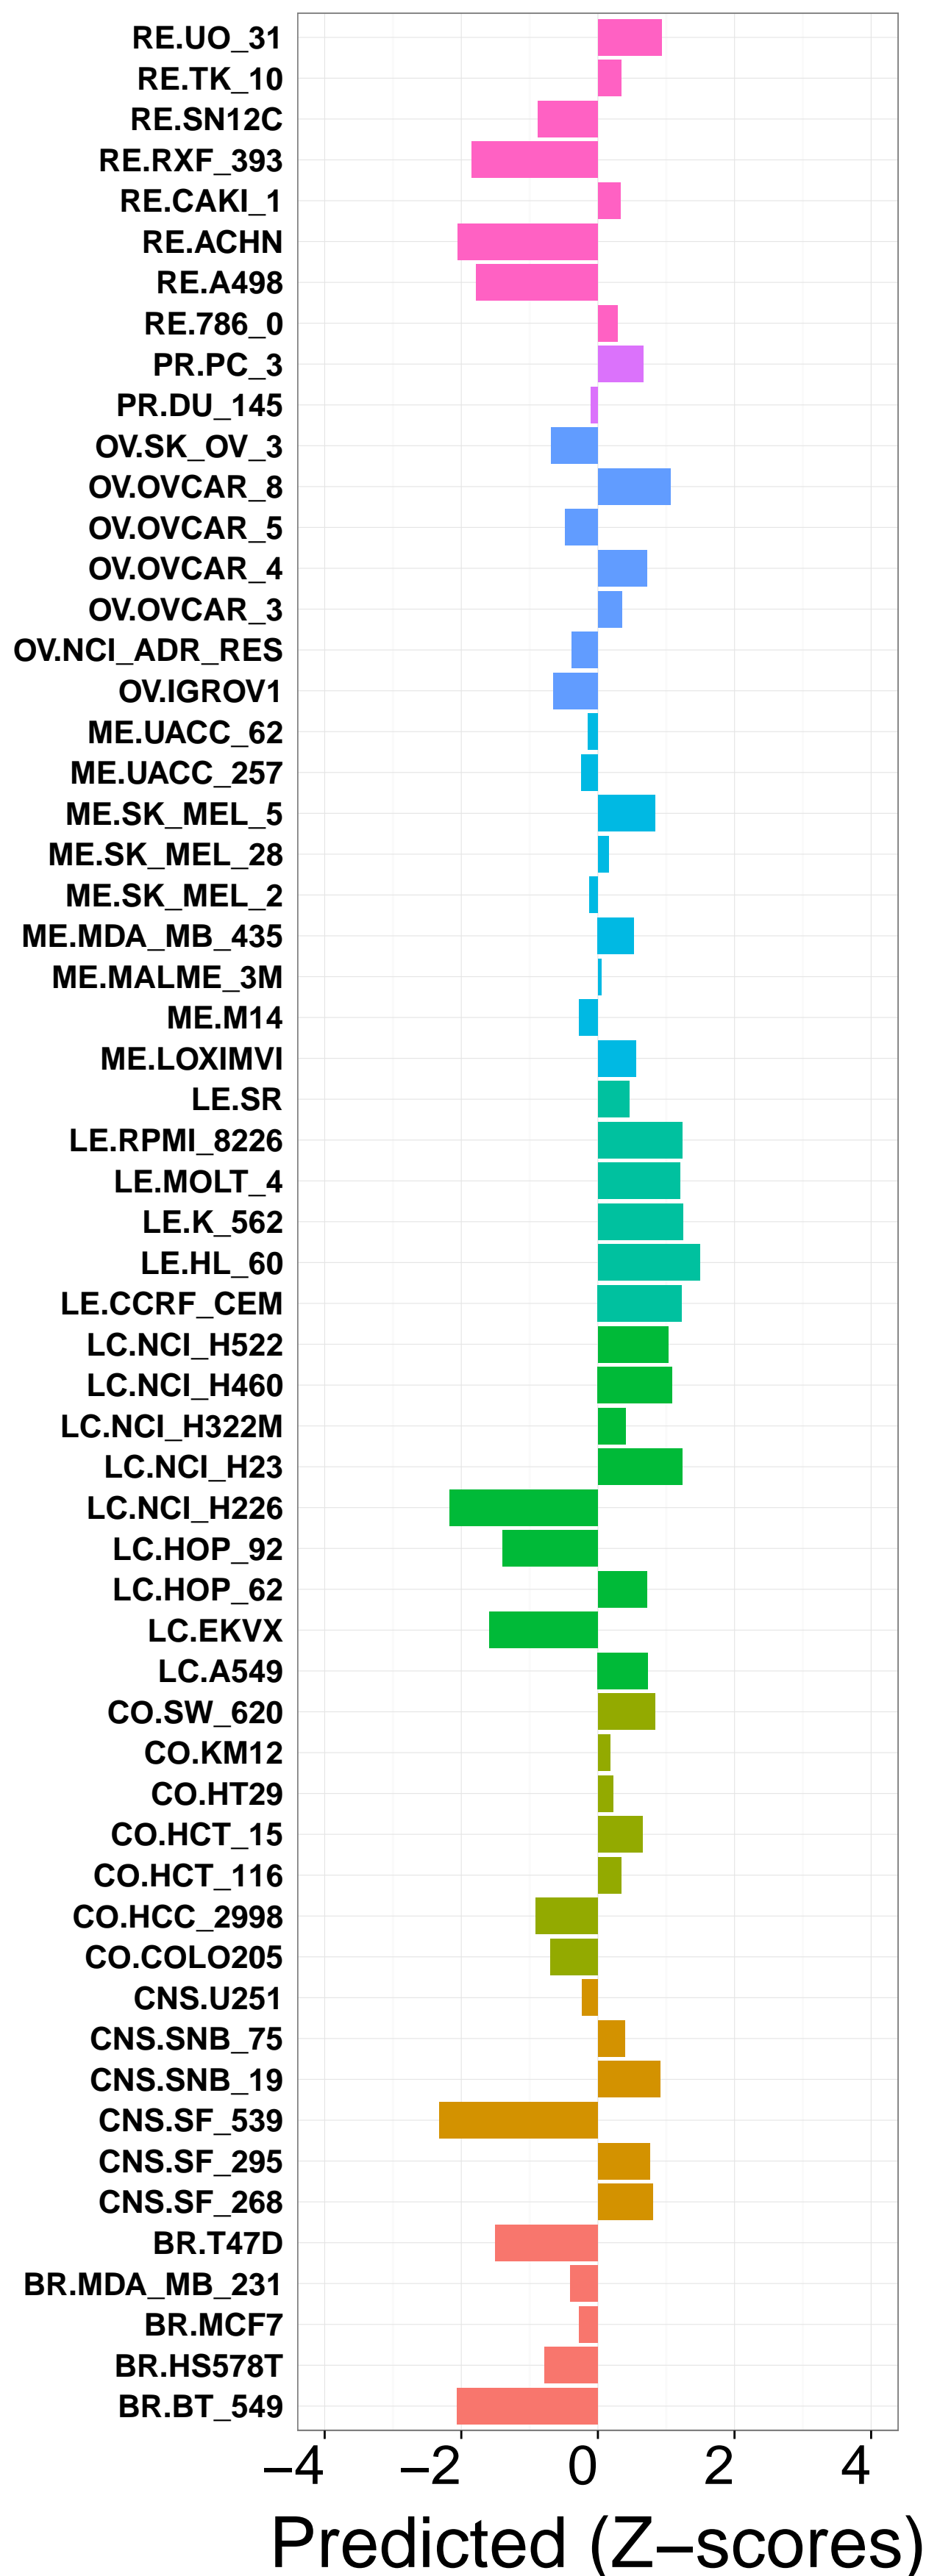



# NSC 741078, selumetinib (LOCO)

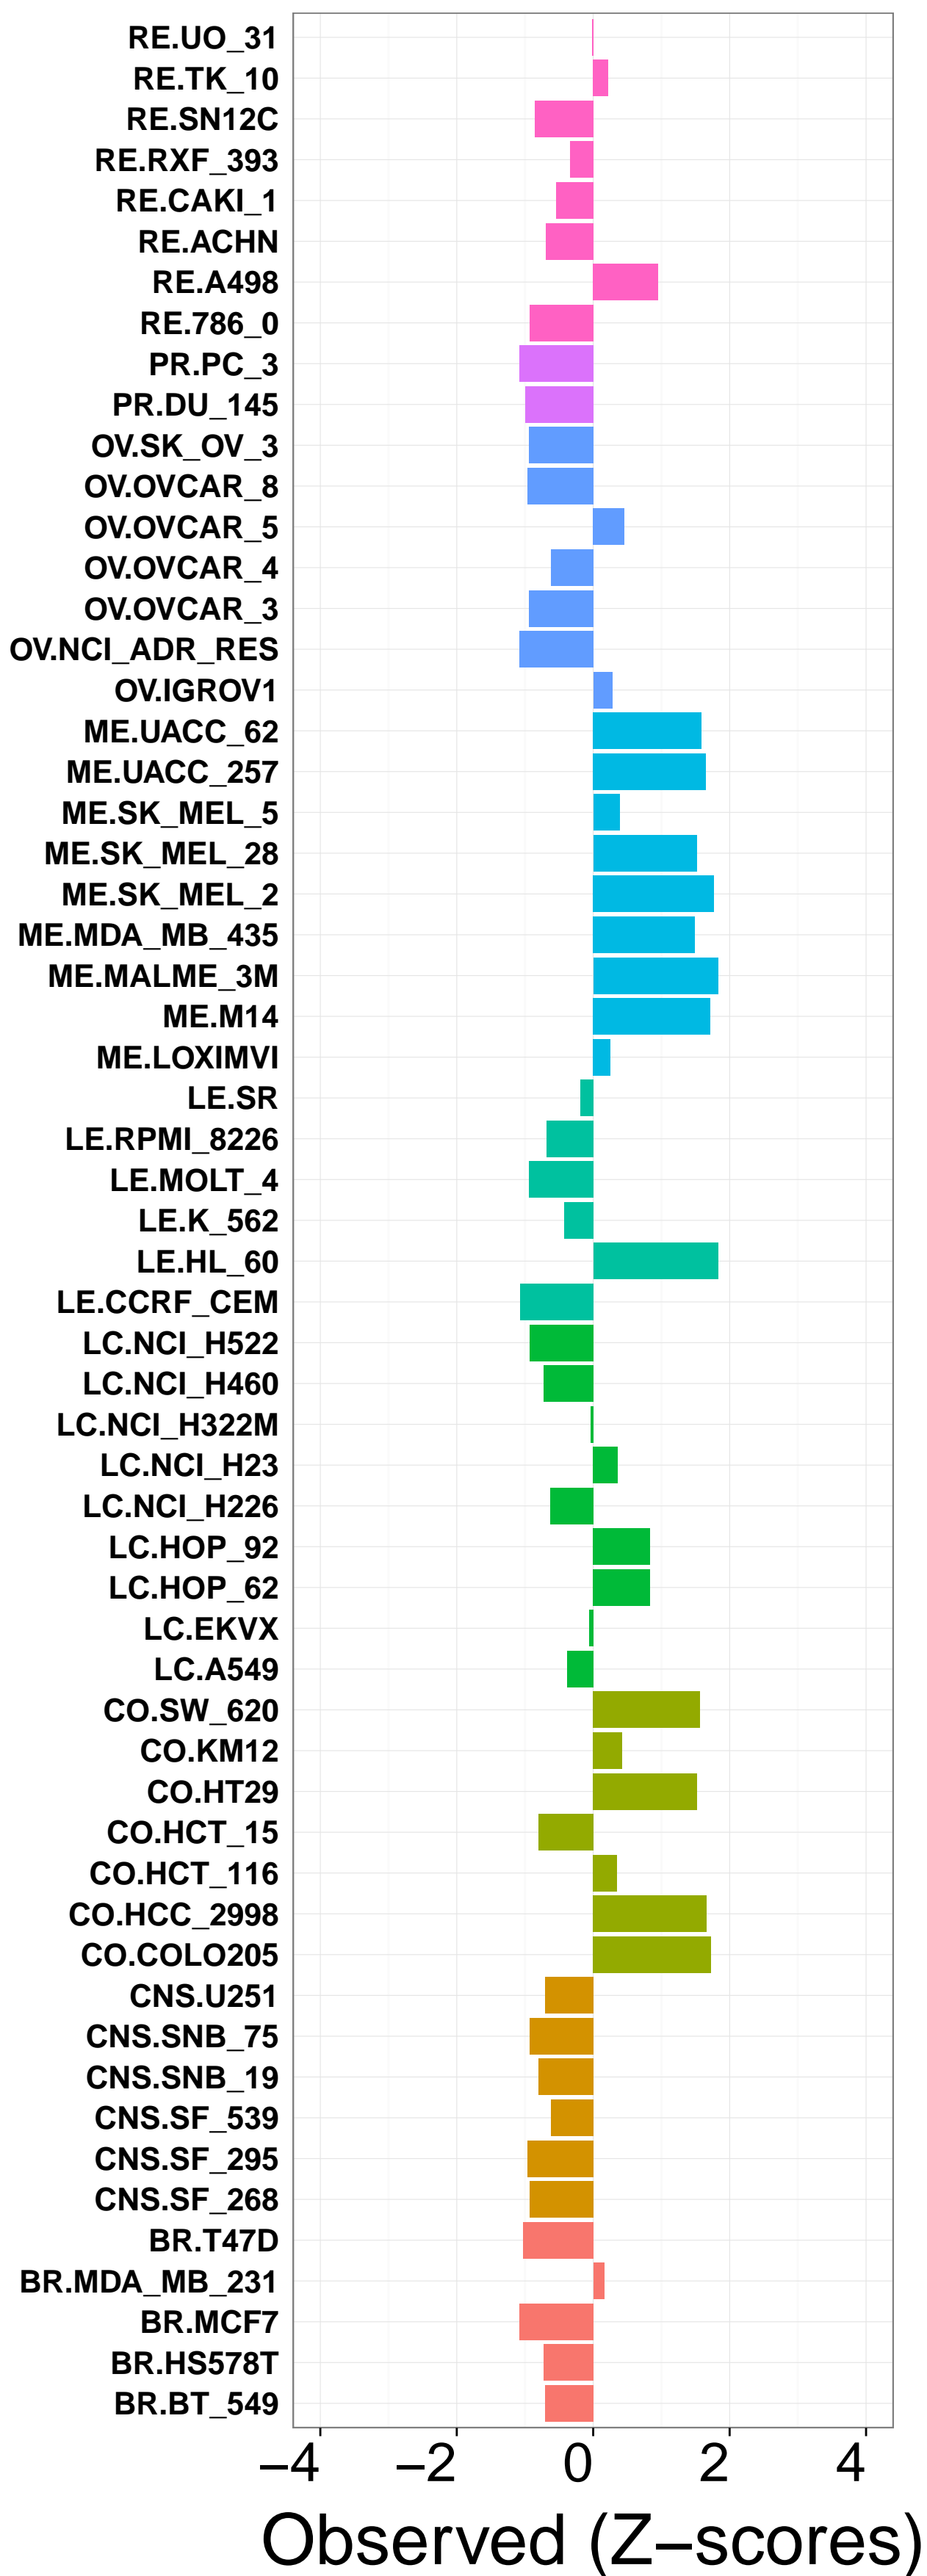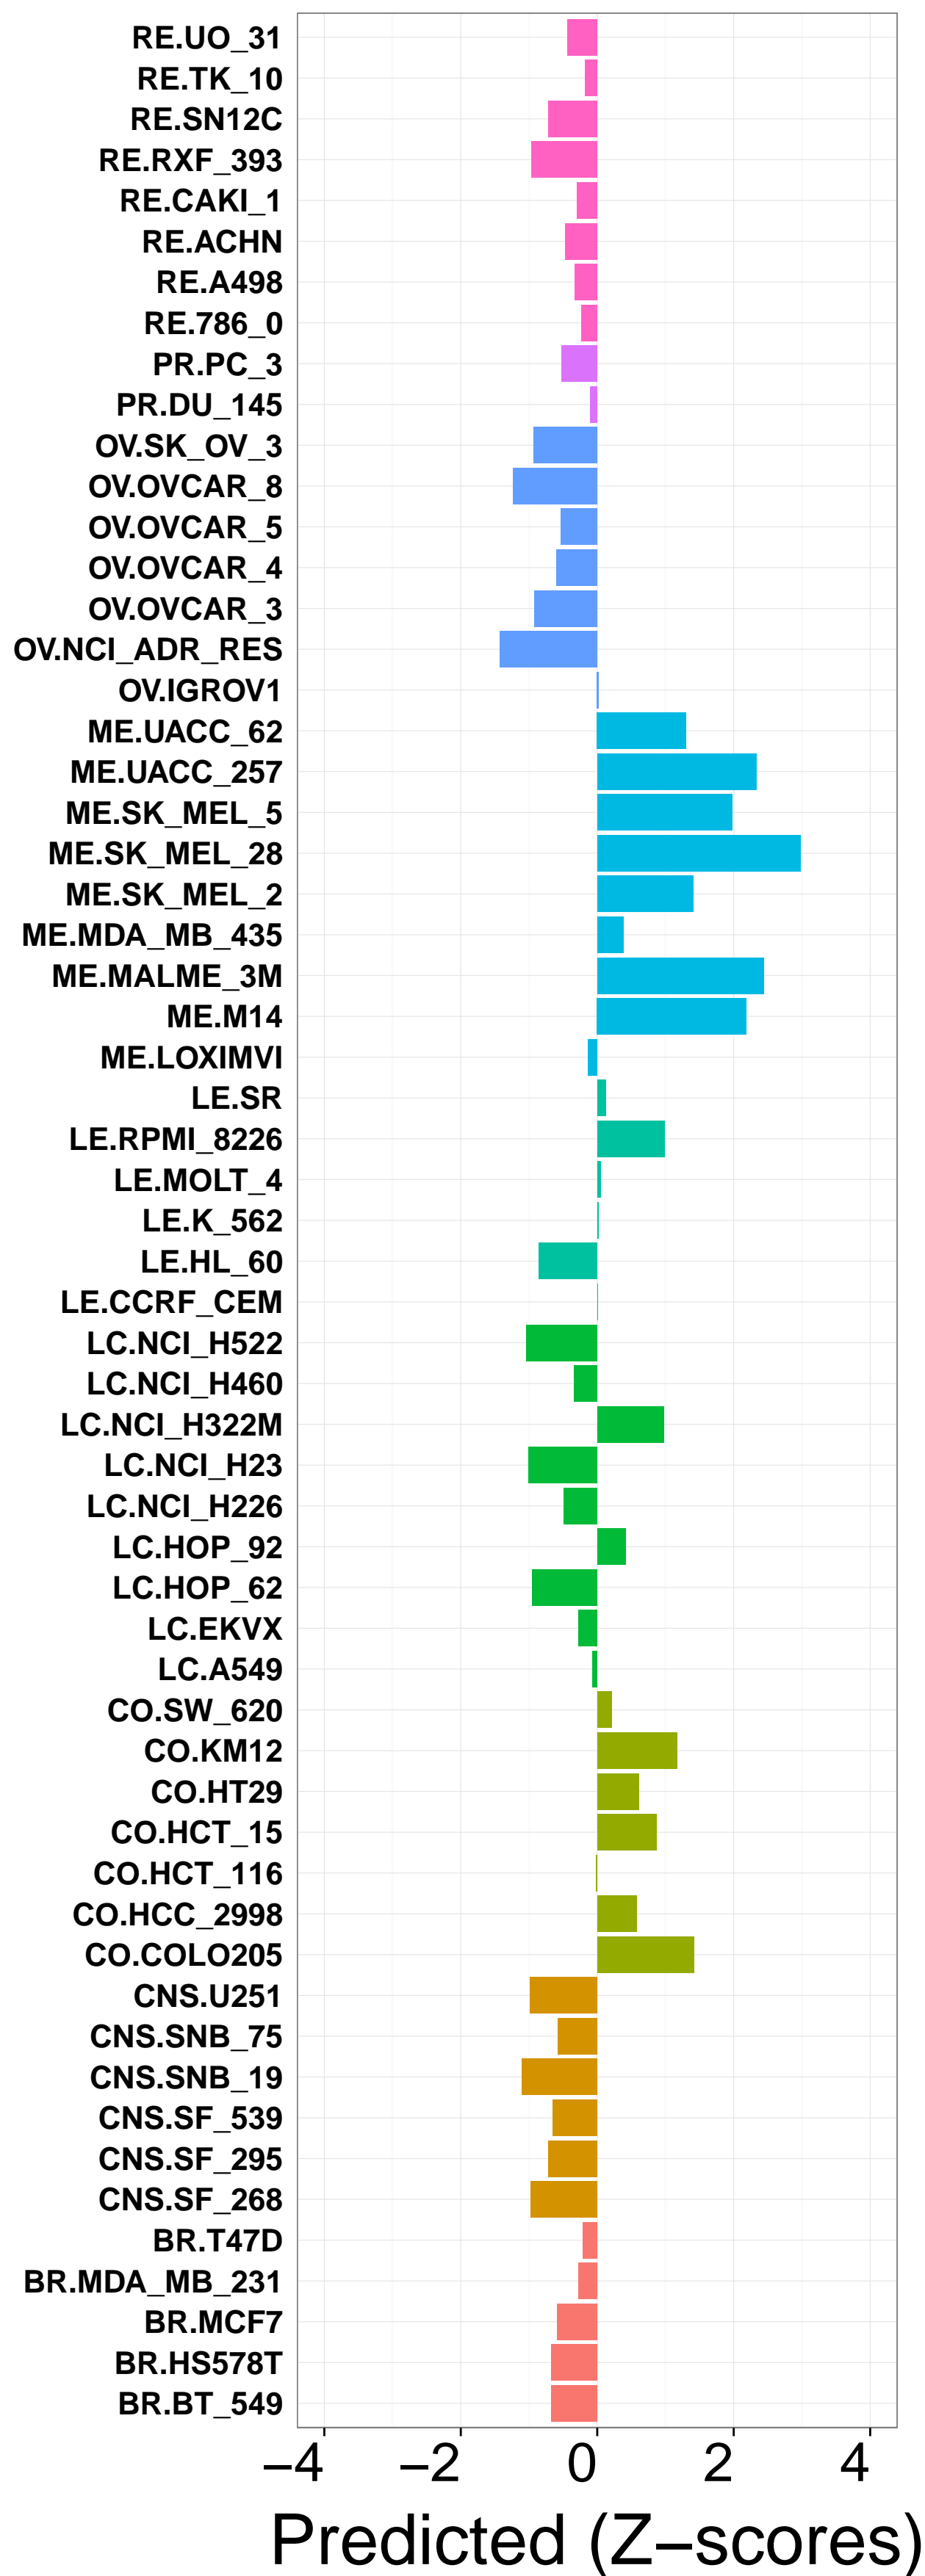

# NSC 745750, Tykerb (LOCO)

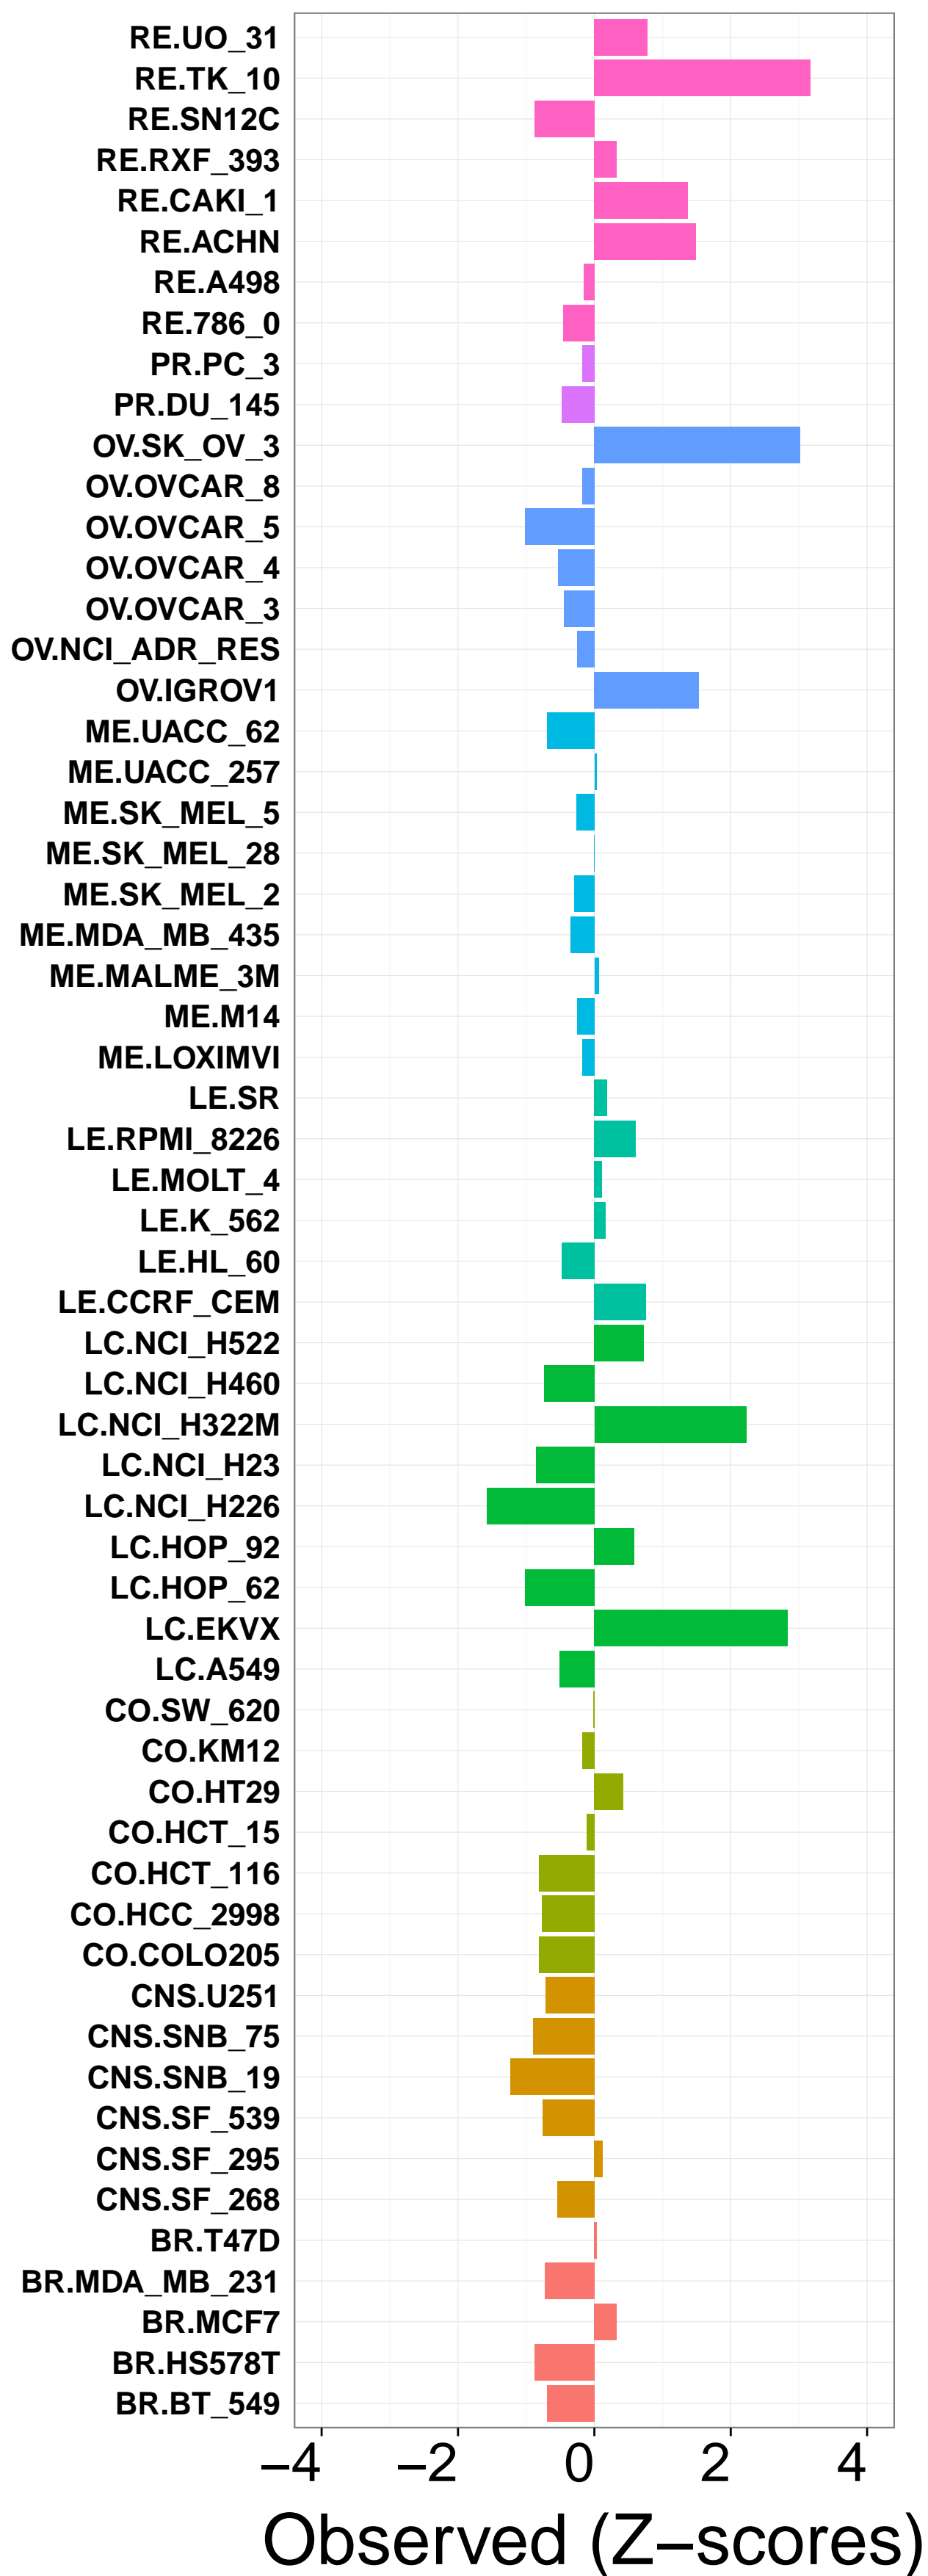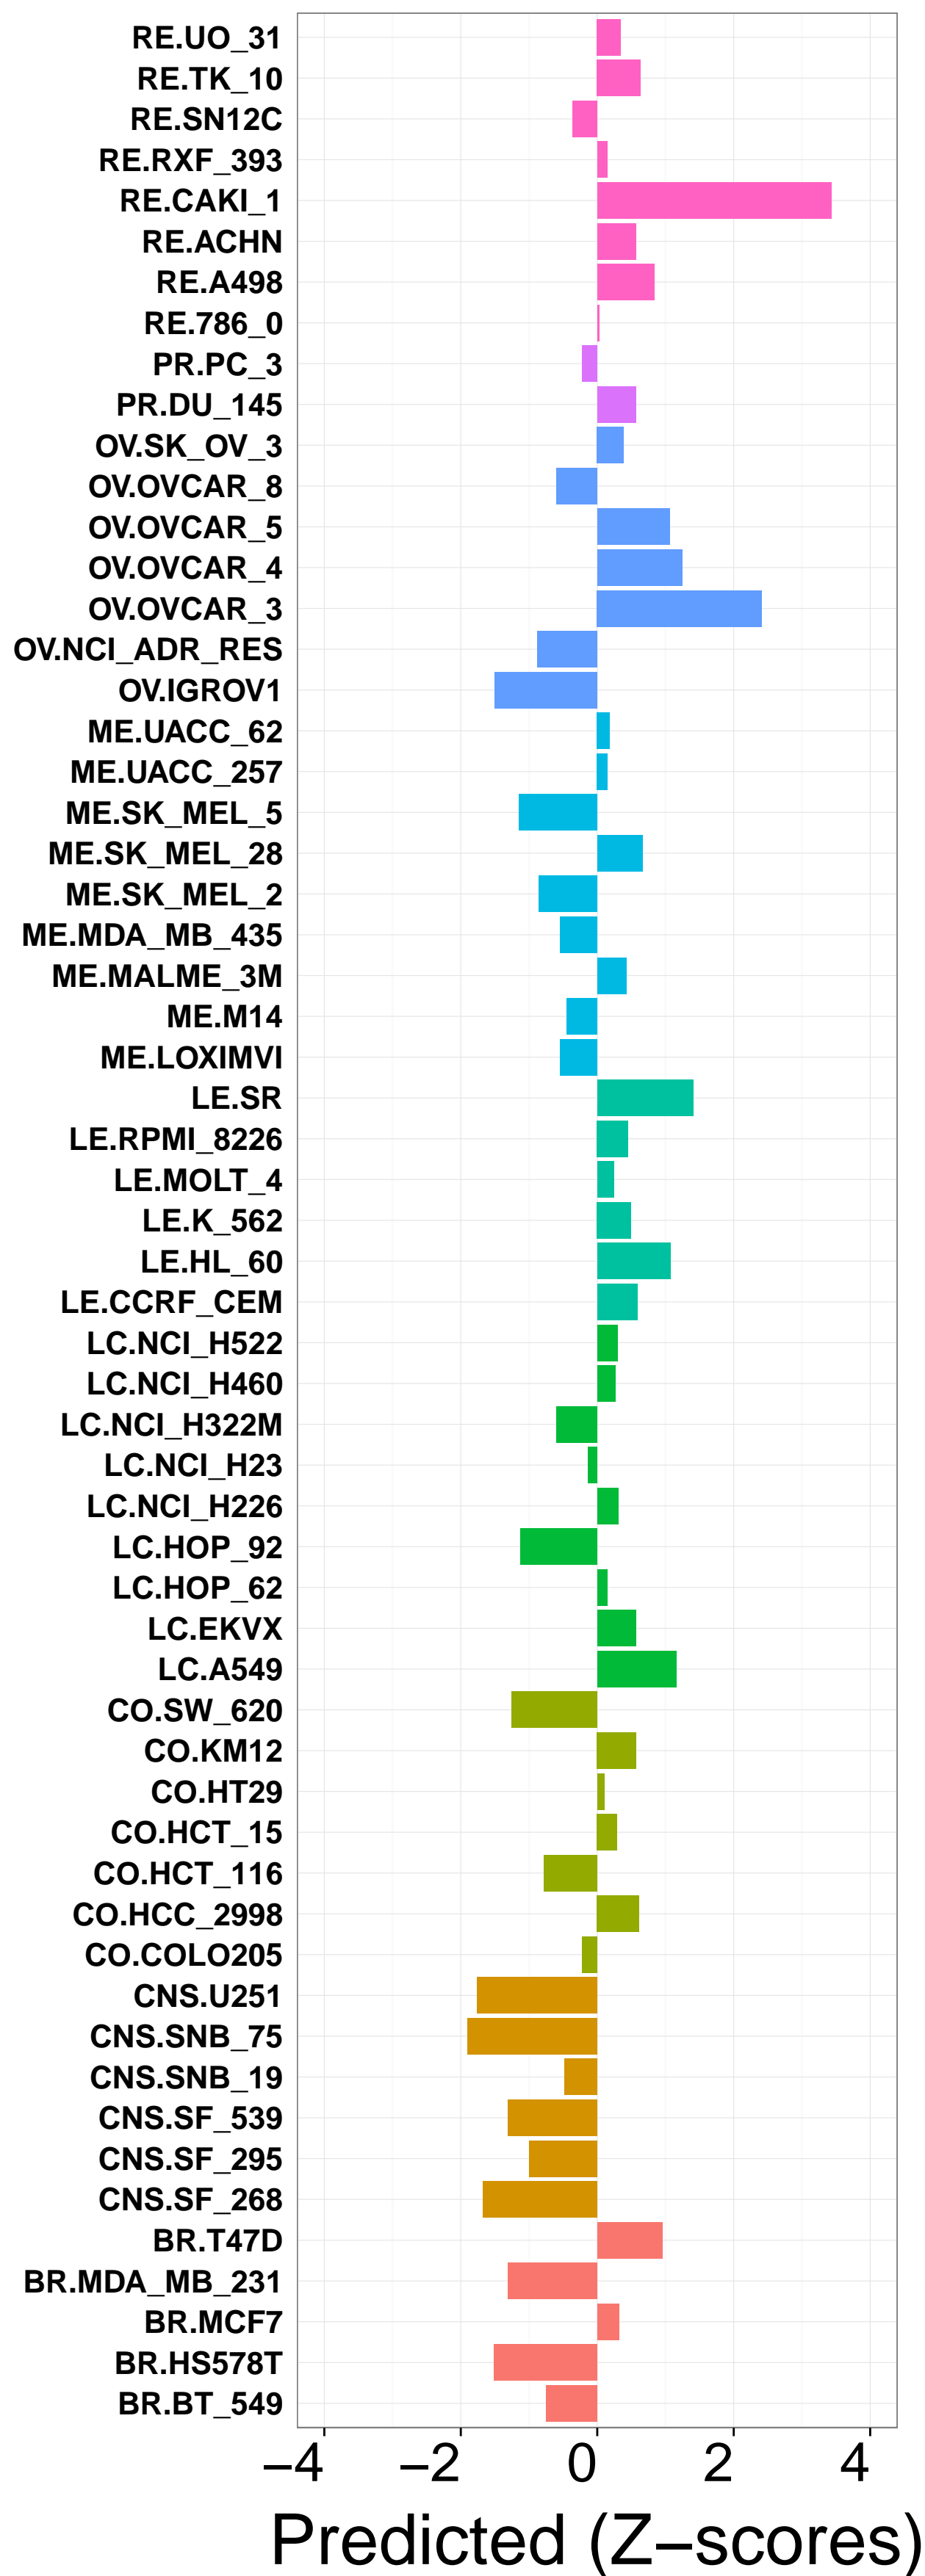

# NSC 749226, (LOCO)

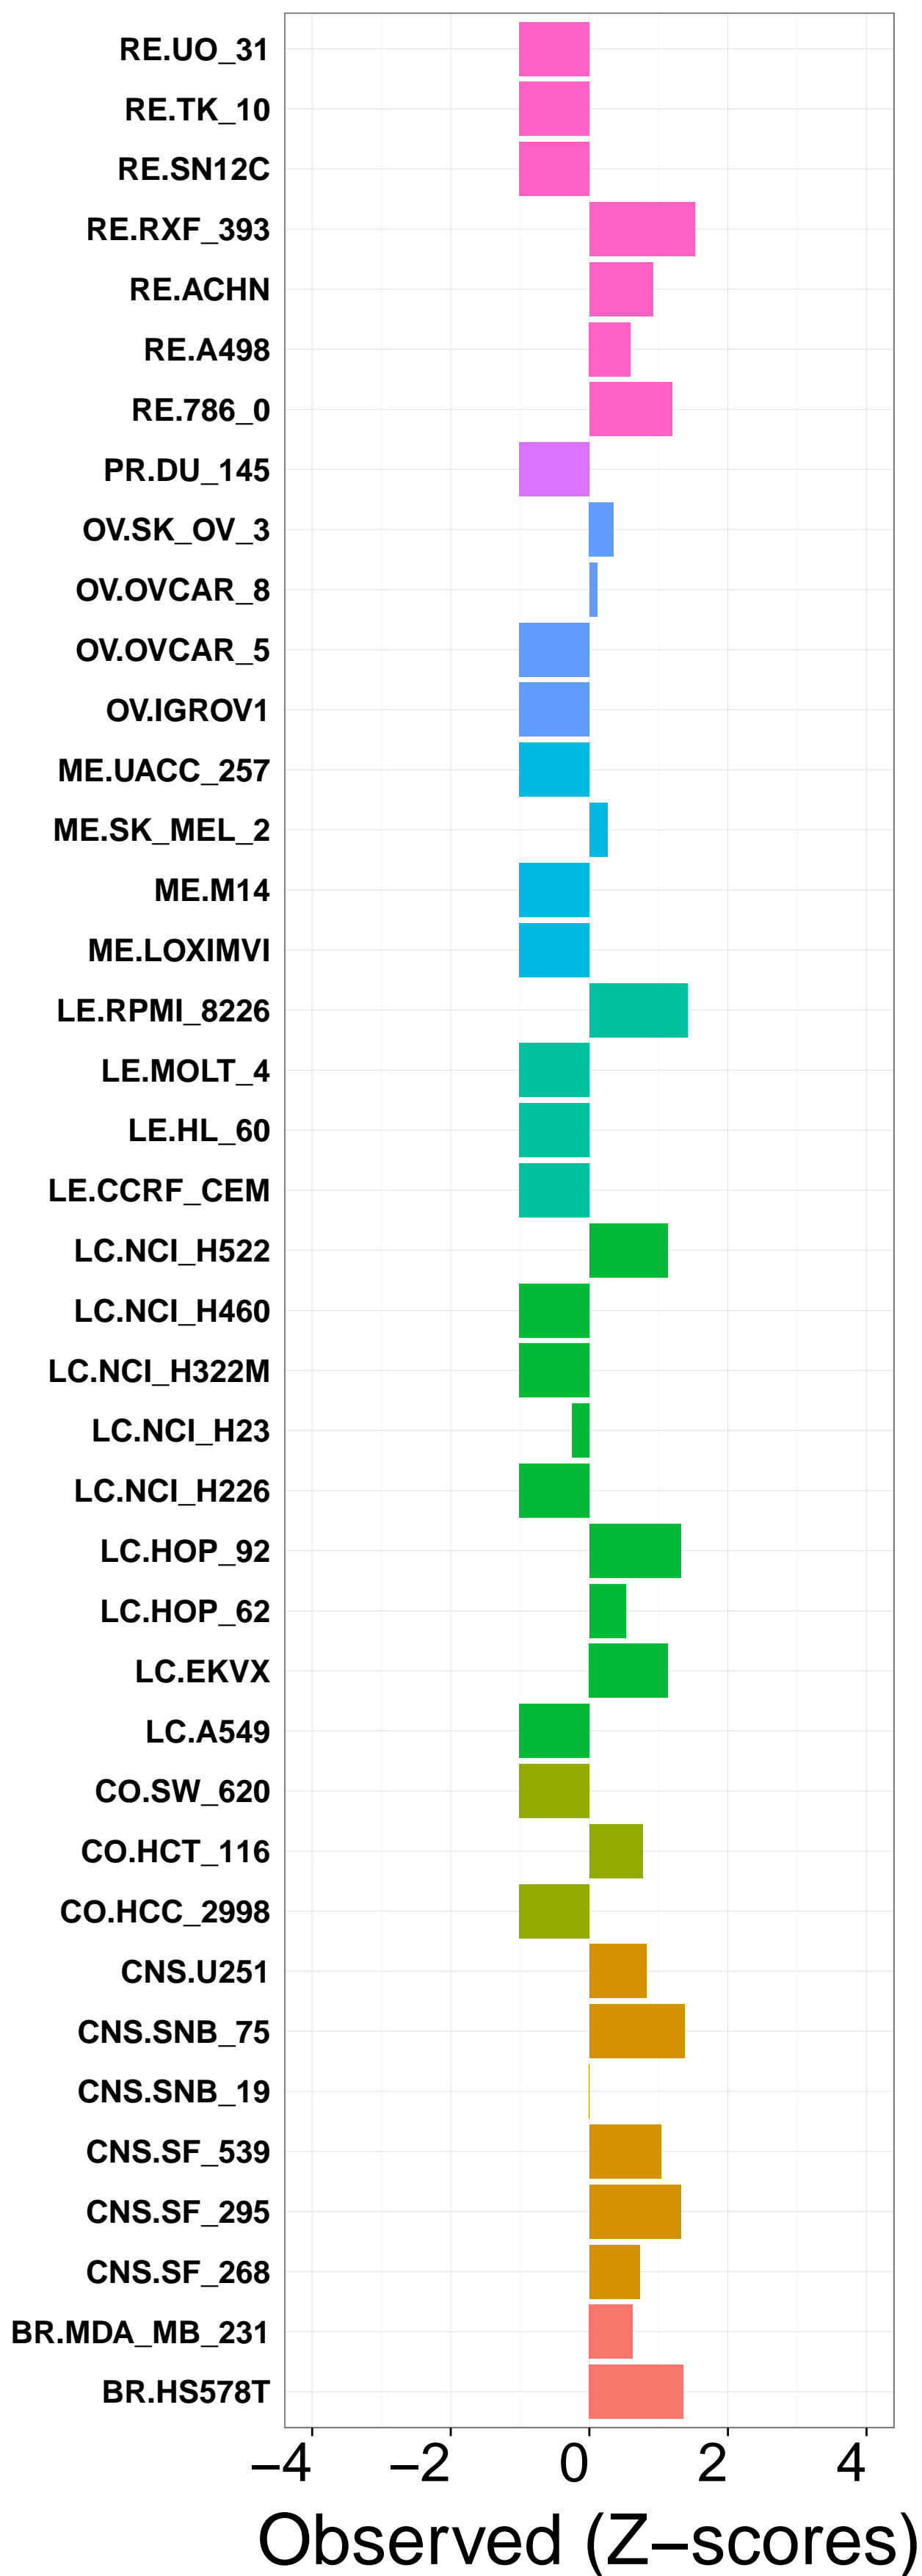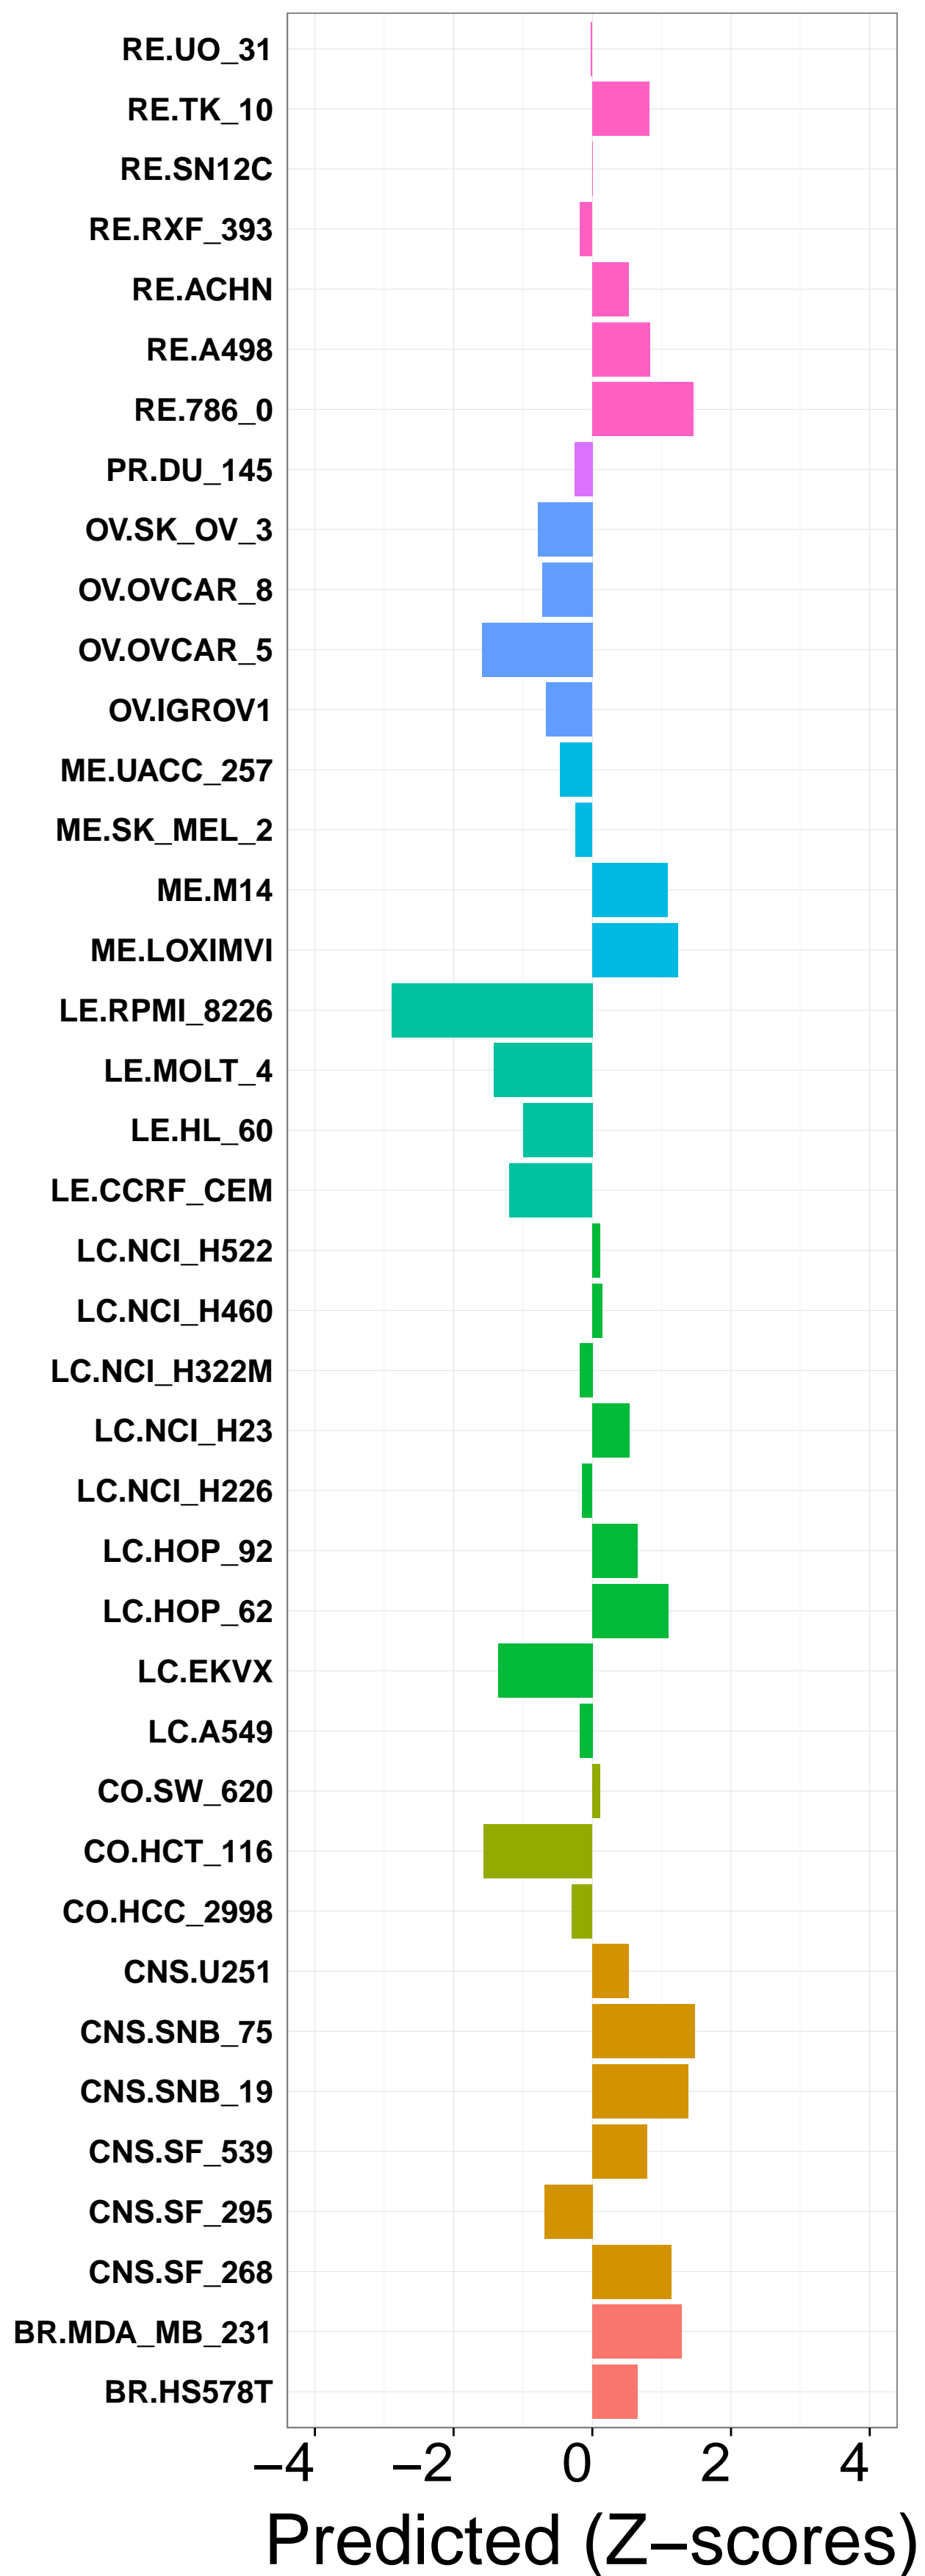

# NSC 755, Mercaptopurine (LOCO)

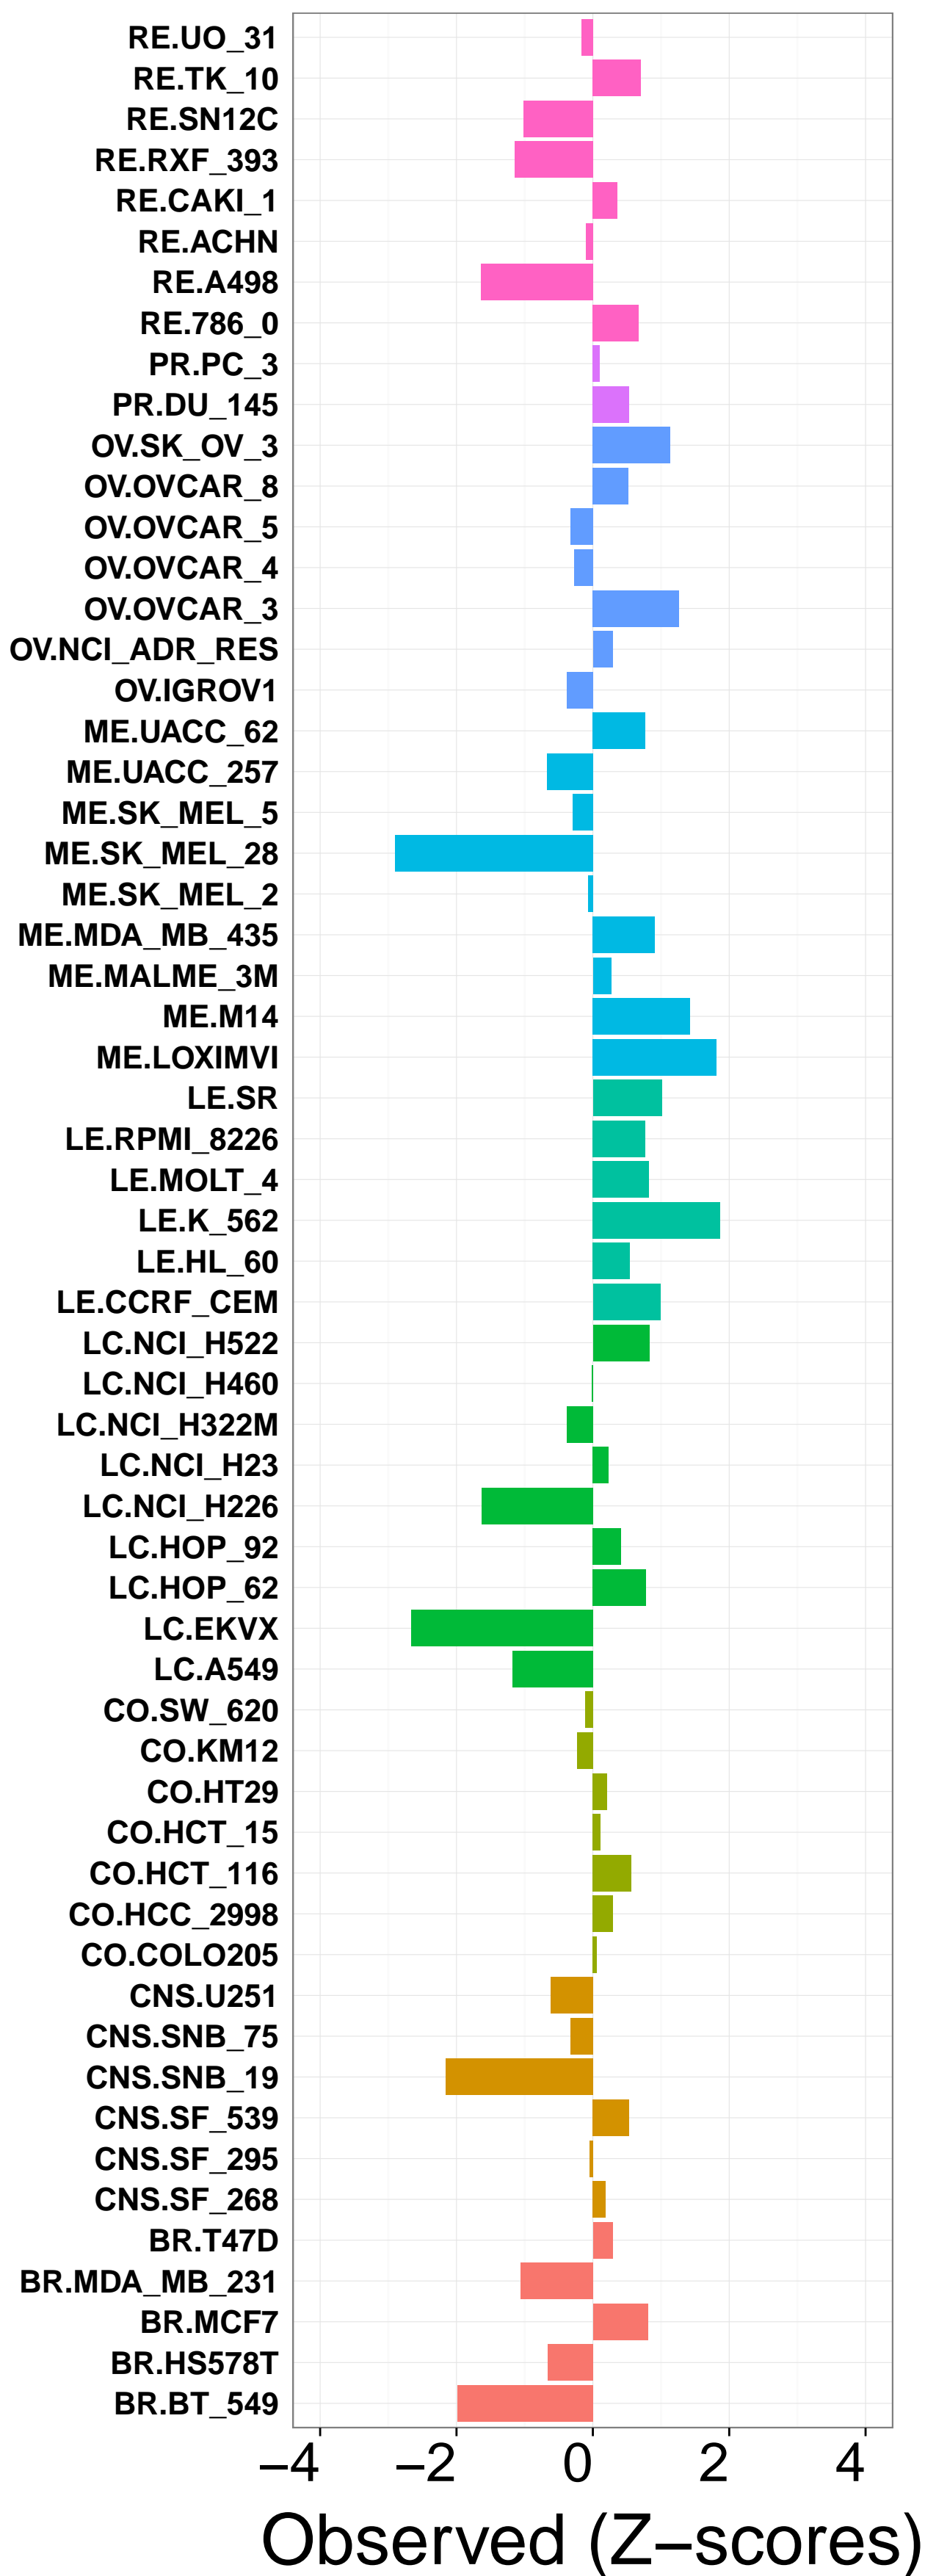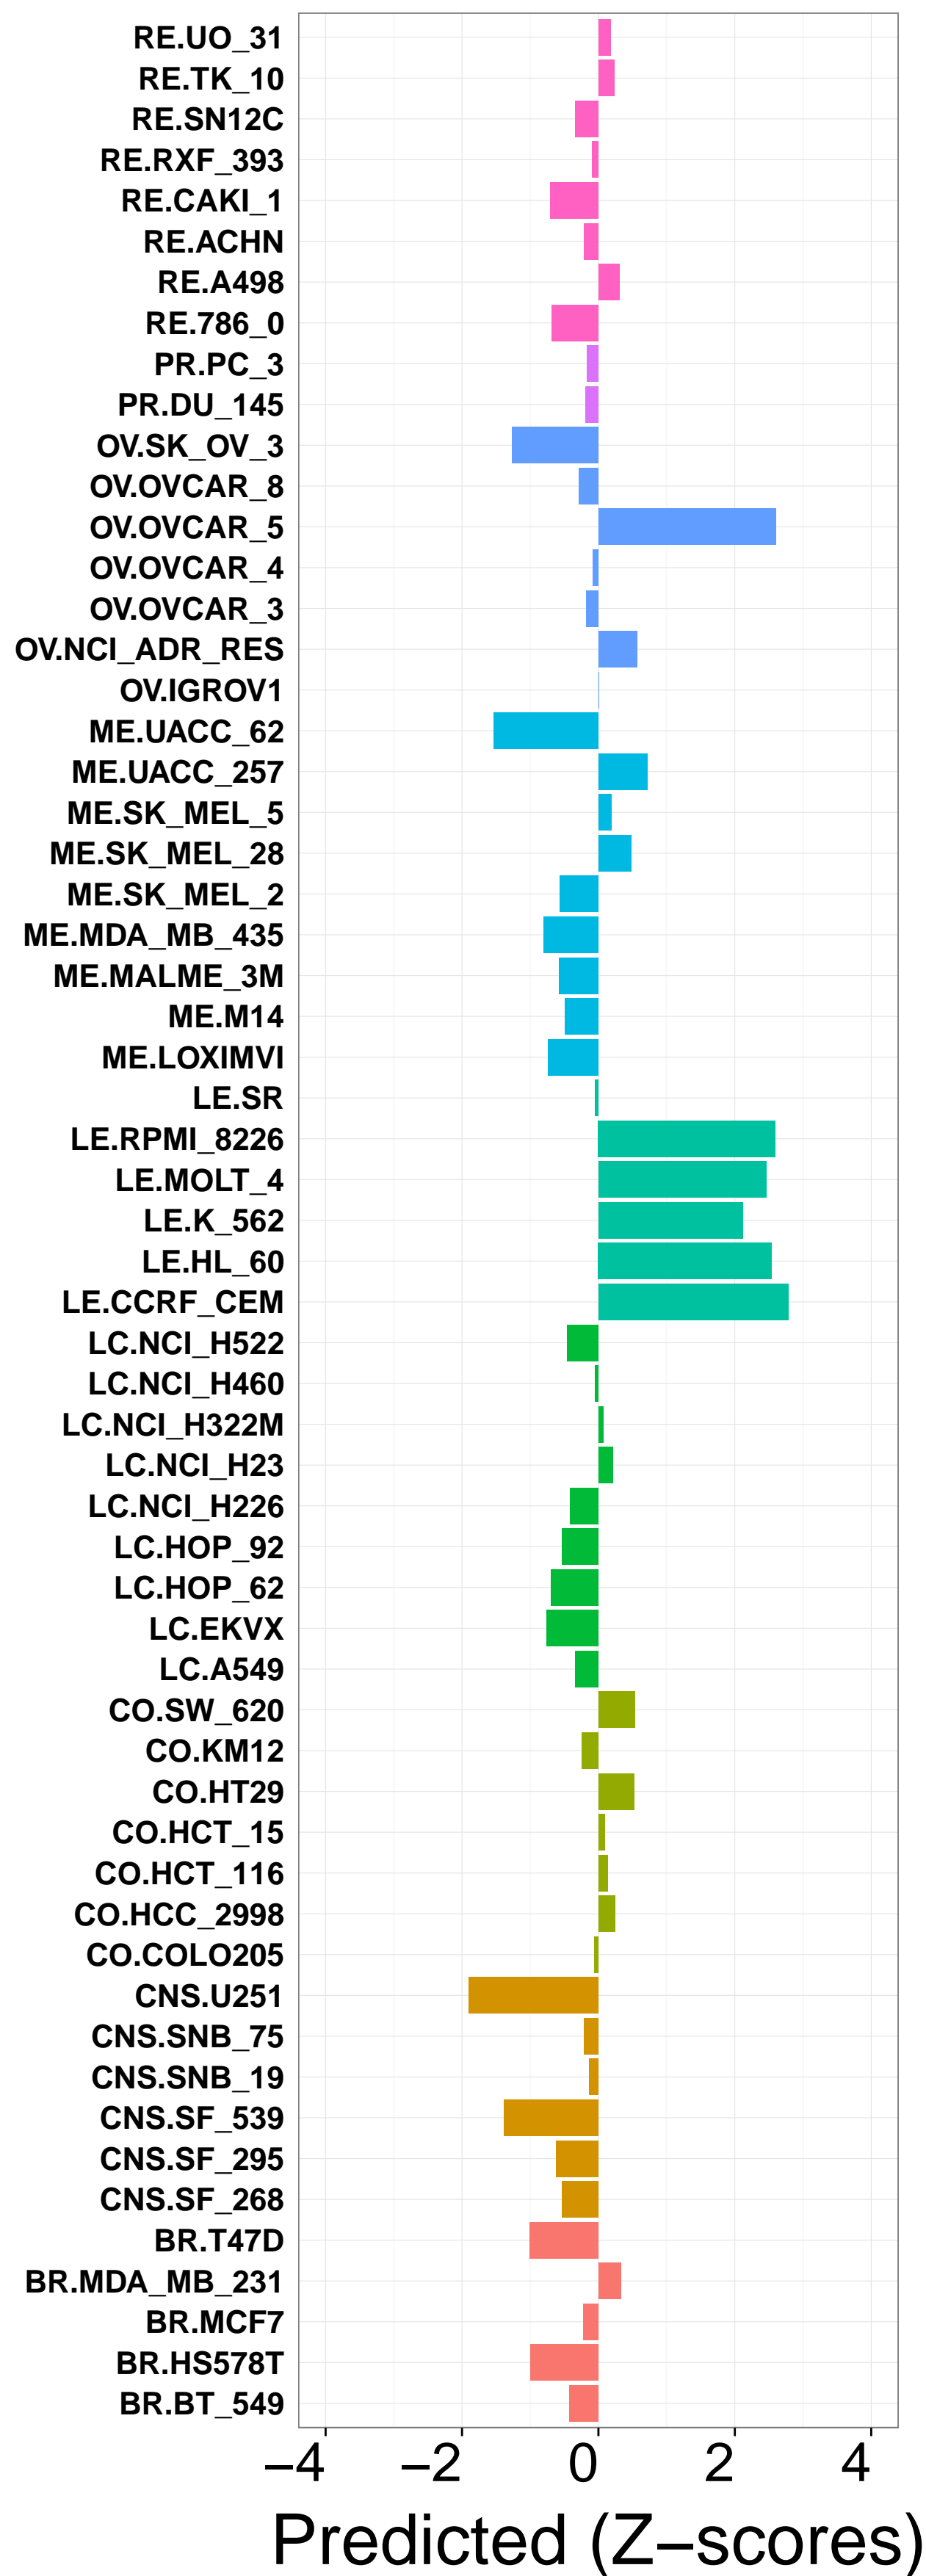

# NSC 762, Mechloroethamine\_Hydrochloride (LOCO)

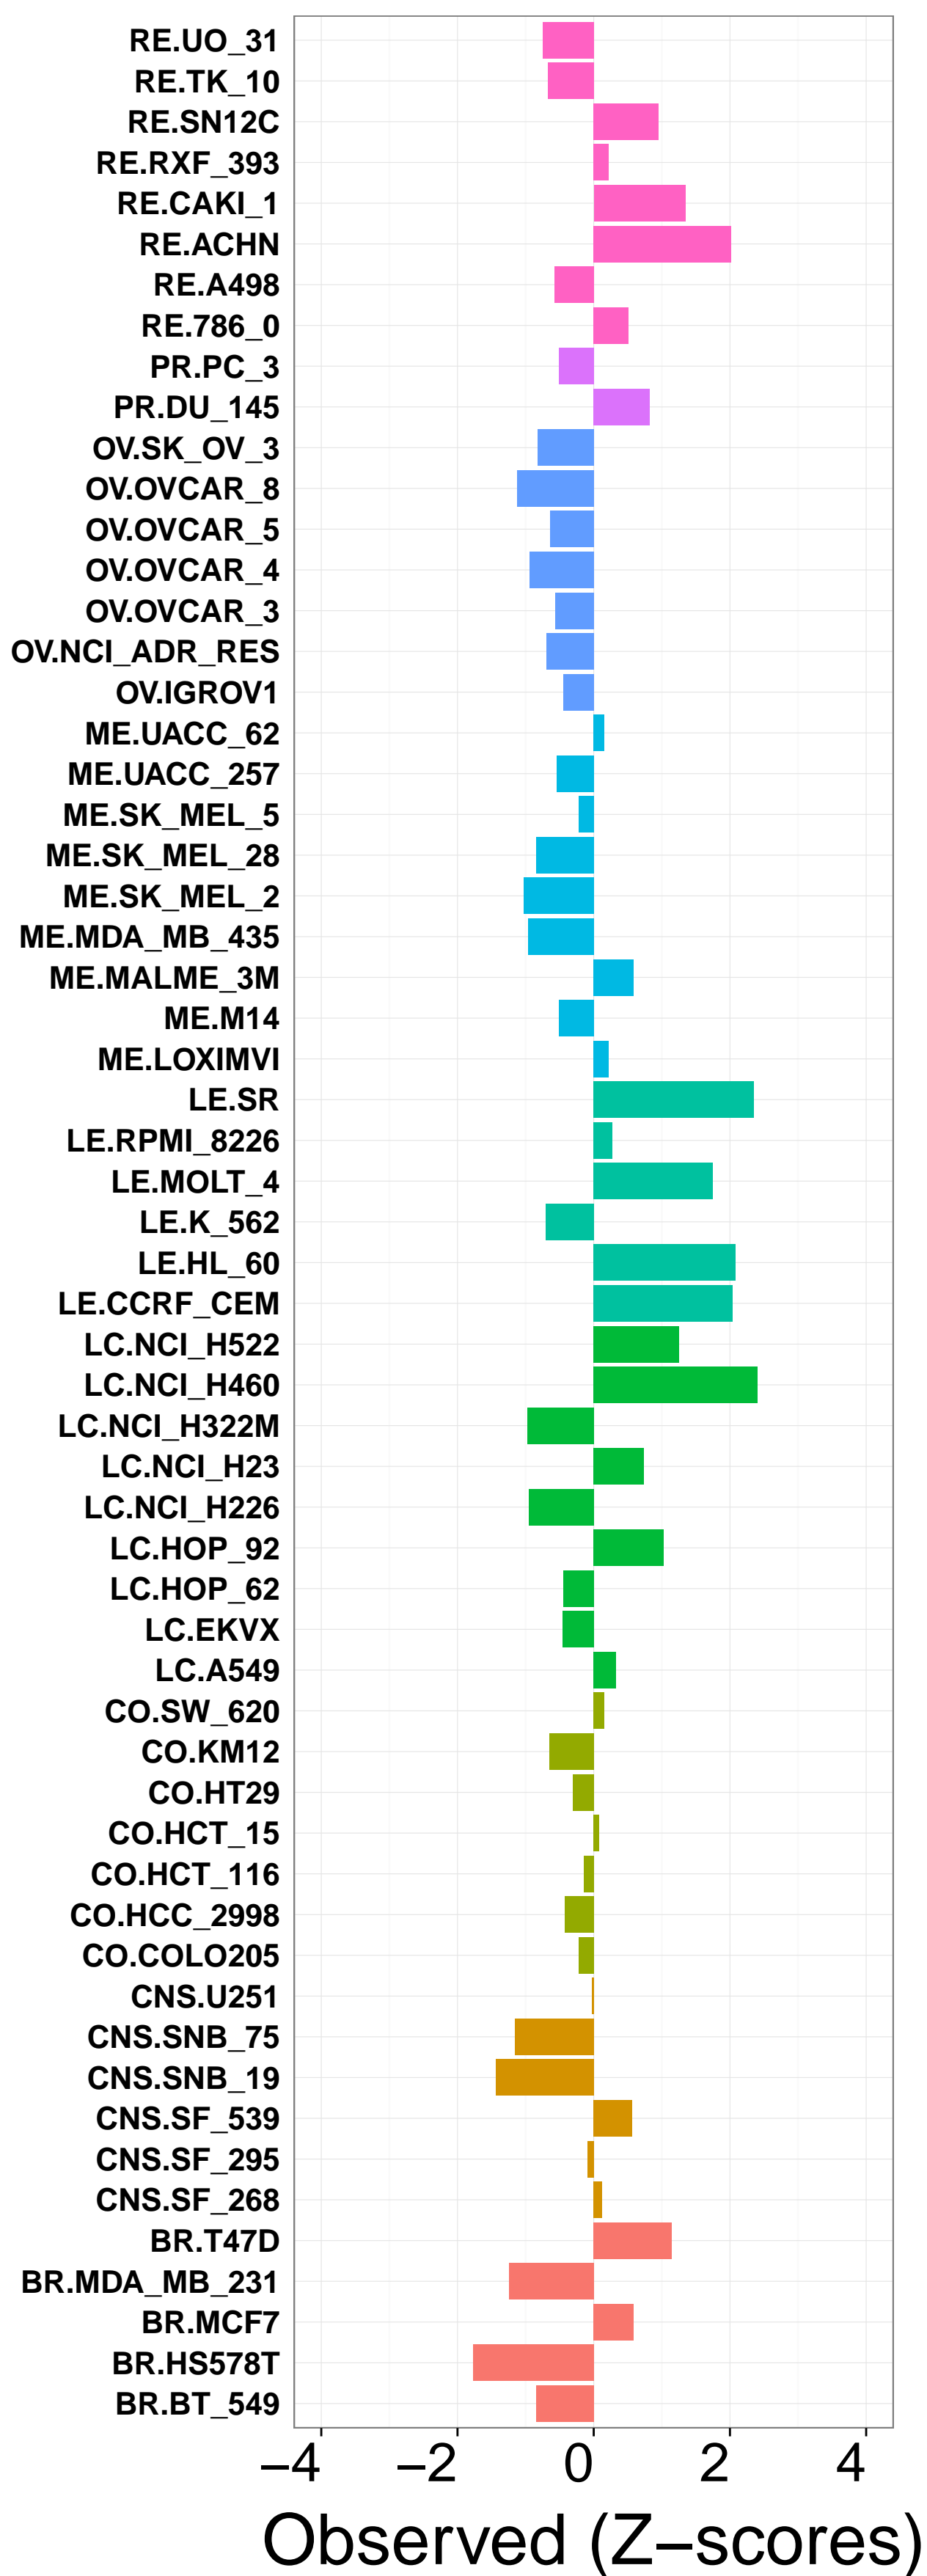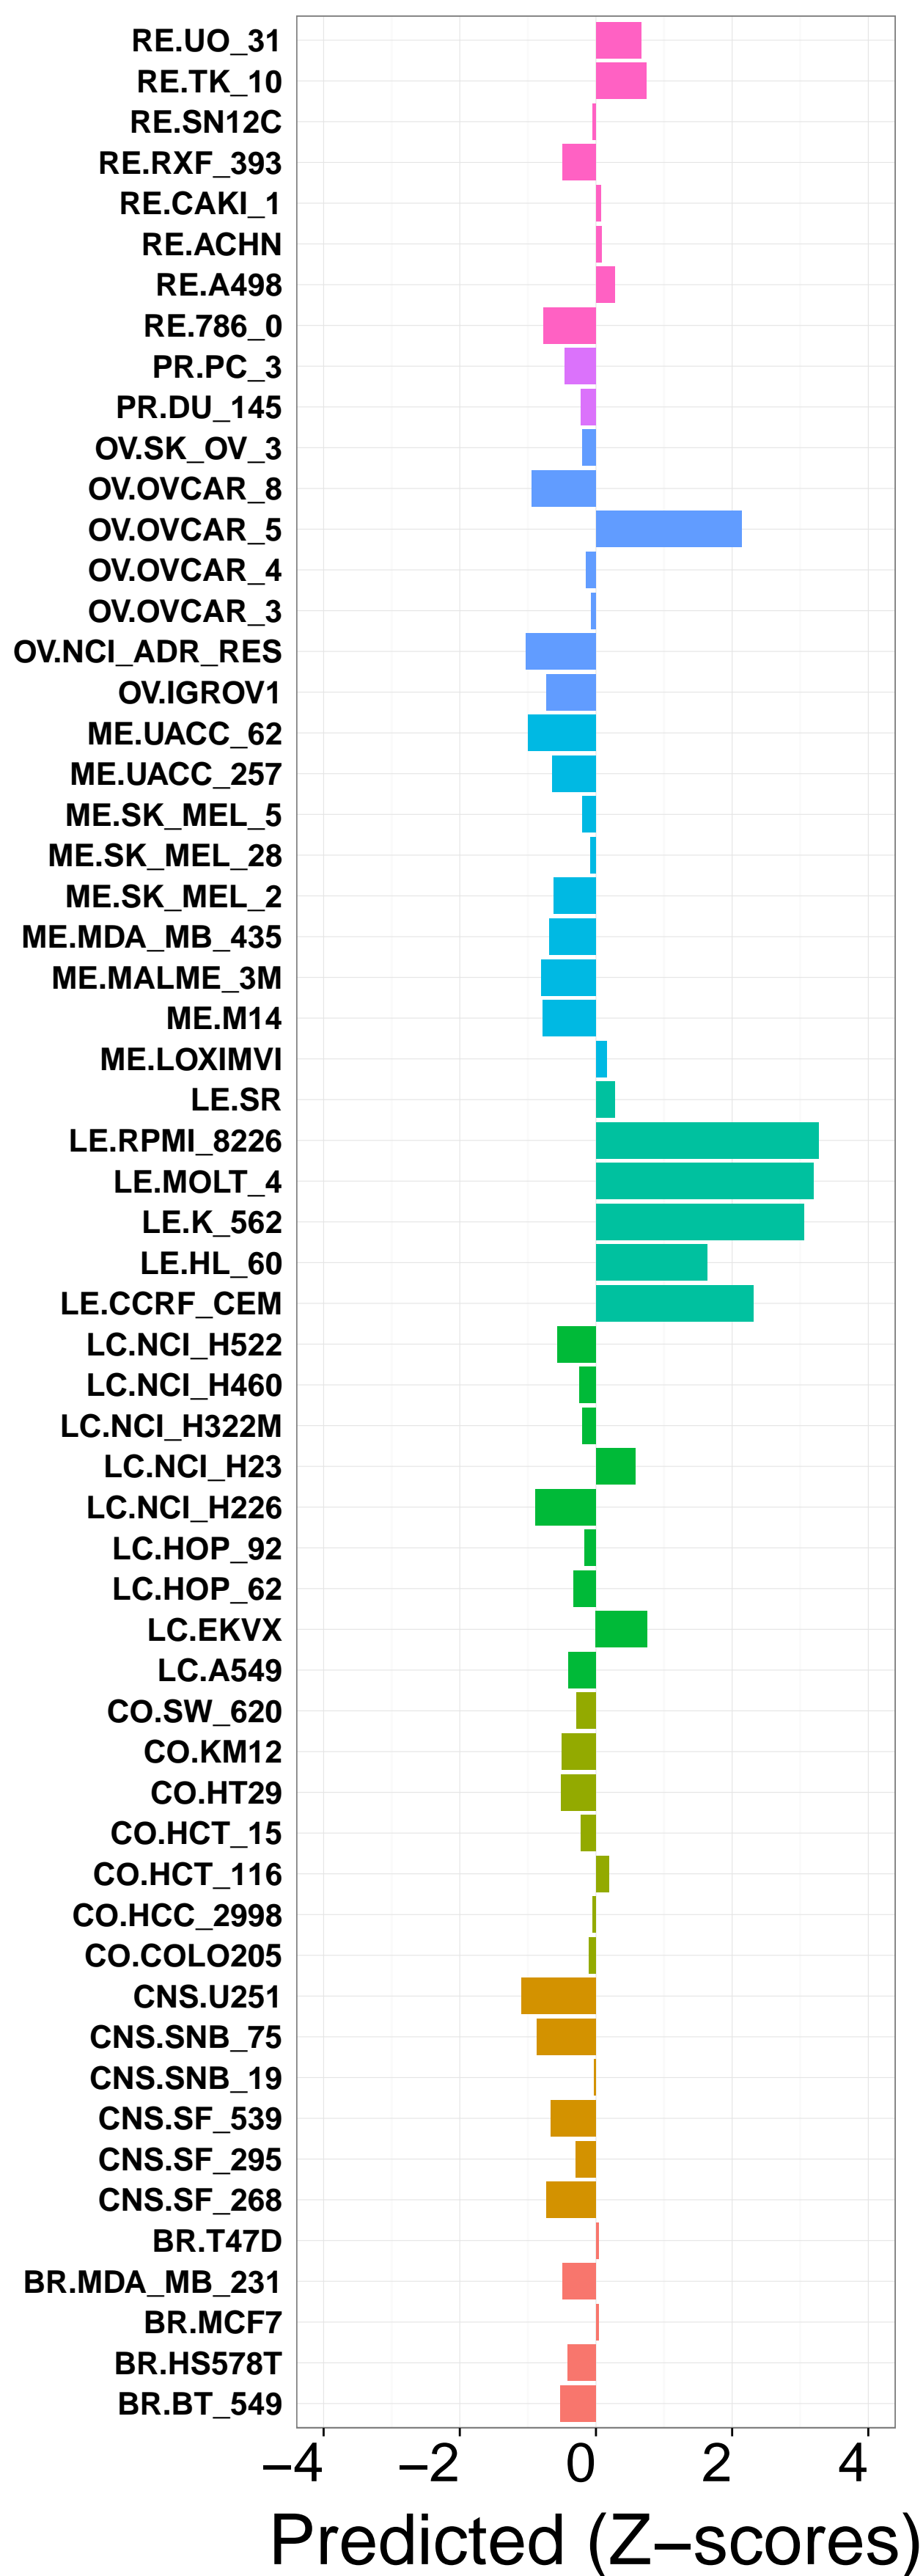



# NSC 105014, Cladribine (LOTO)

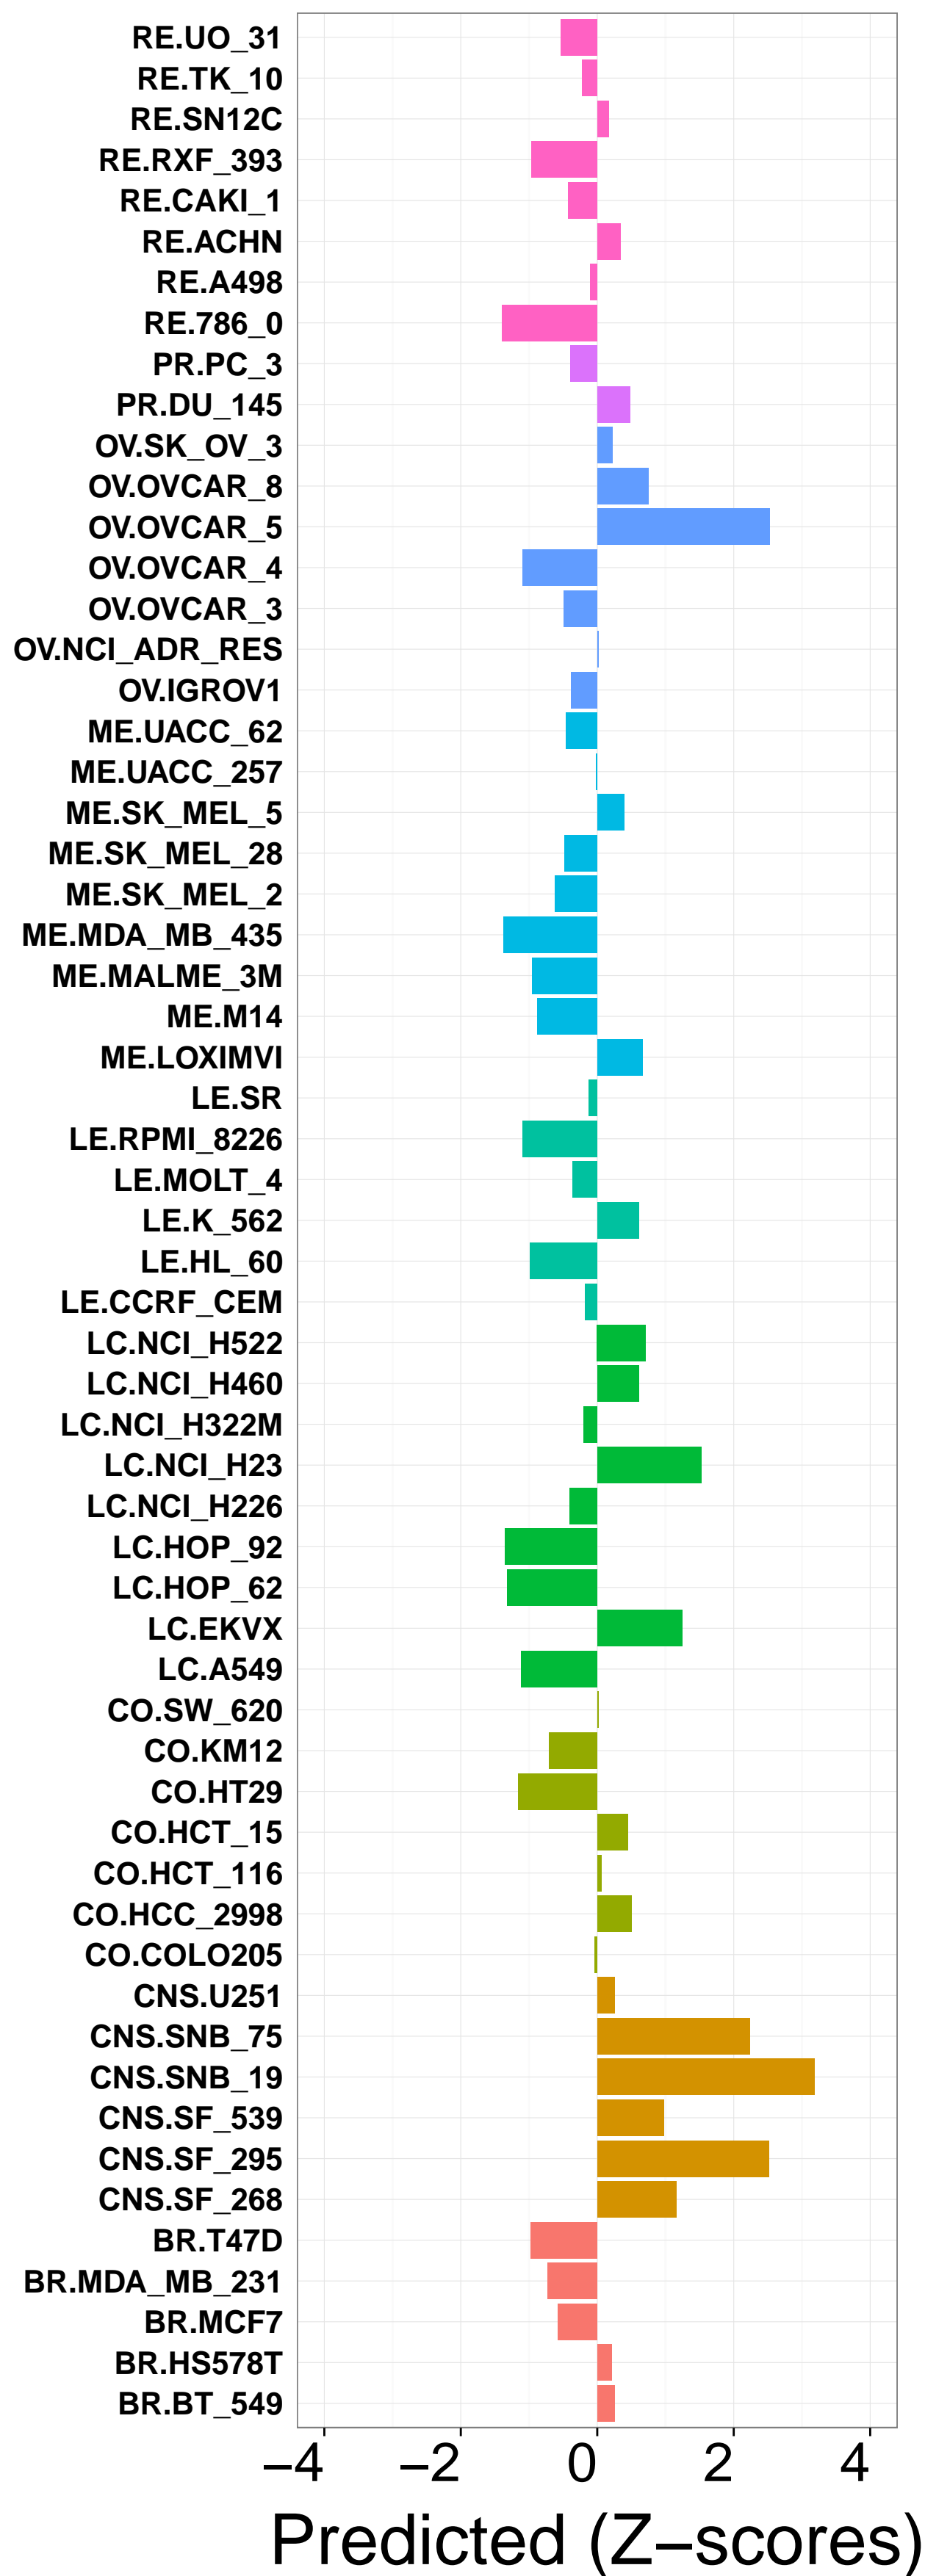

# NSC 118218, Fludarabine (LOTO)

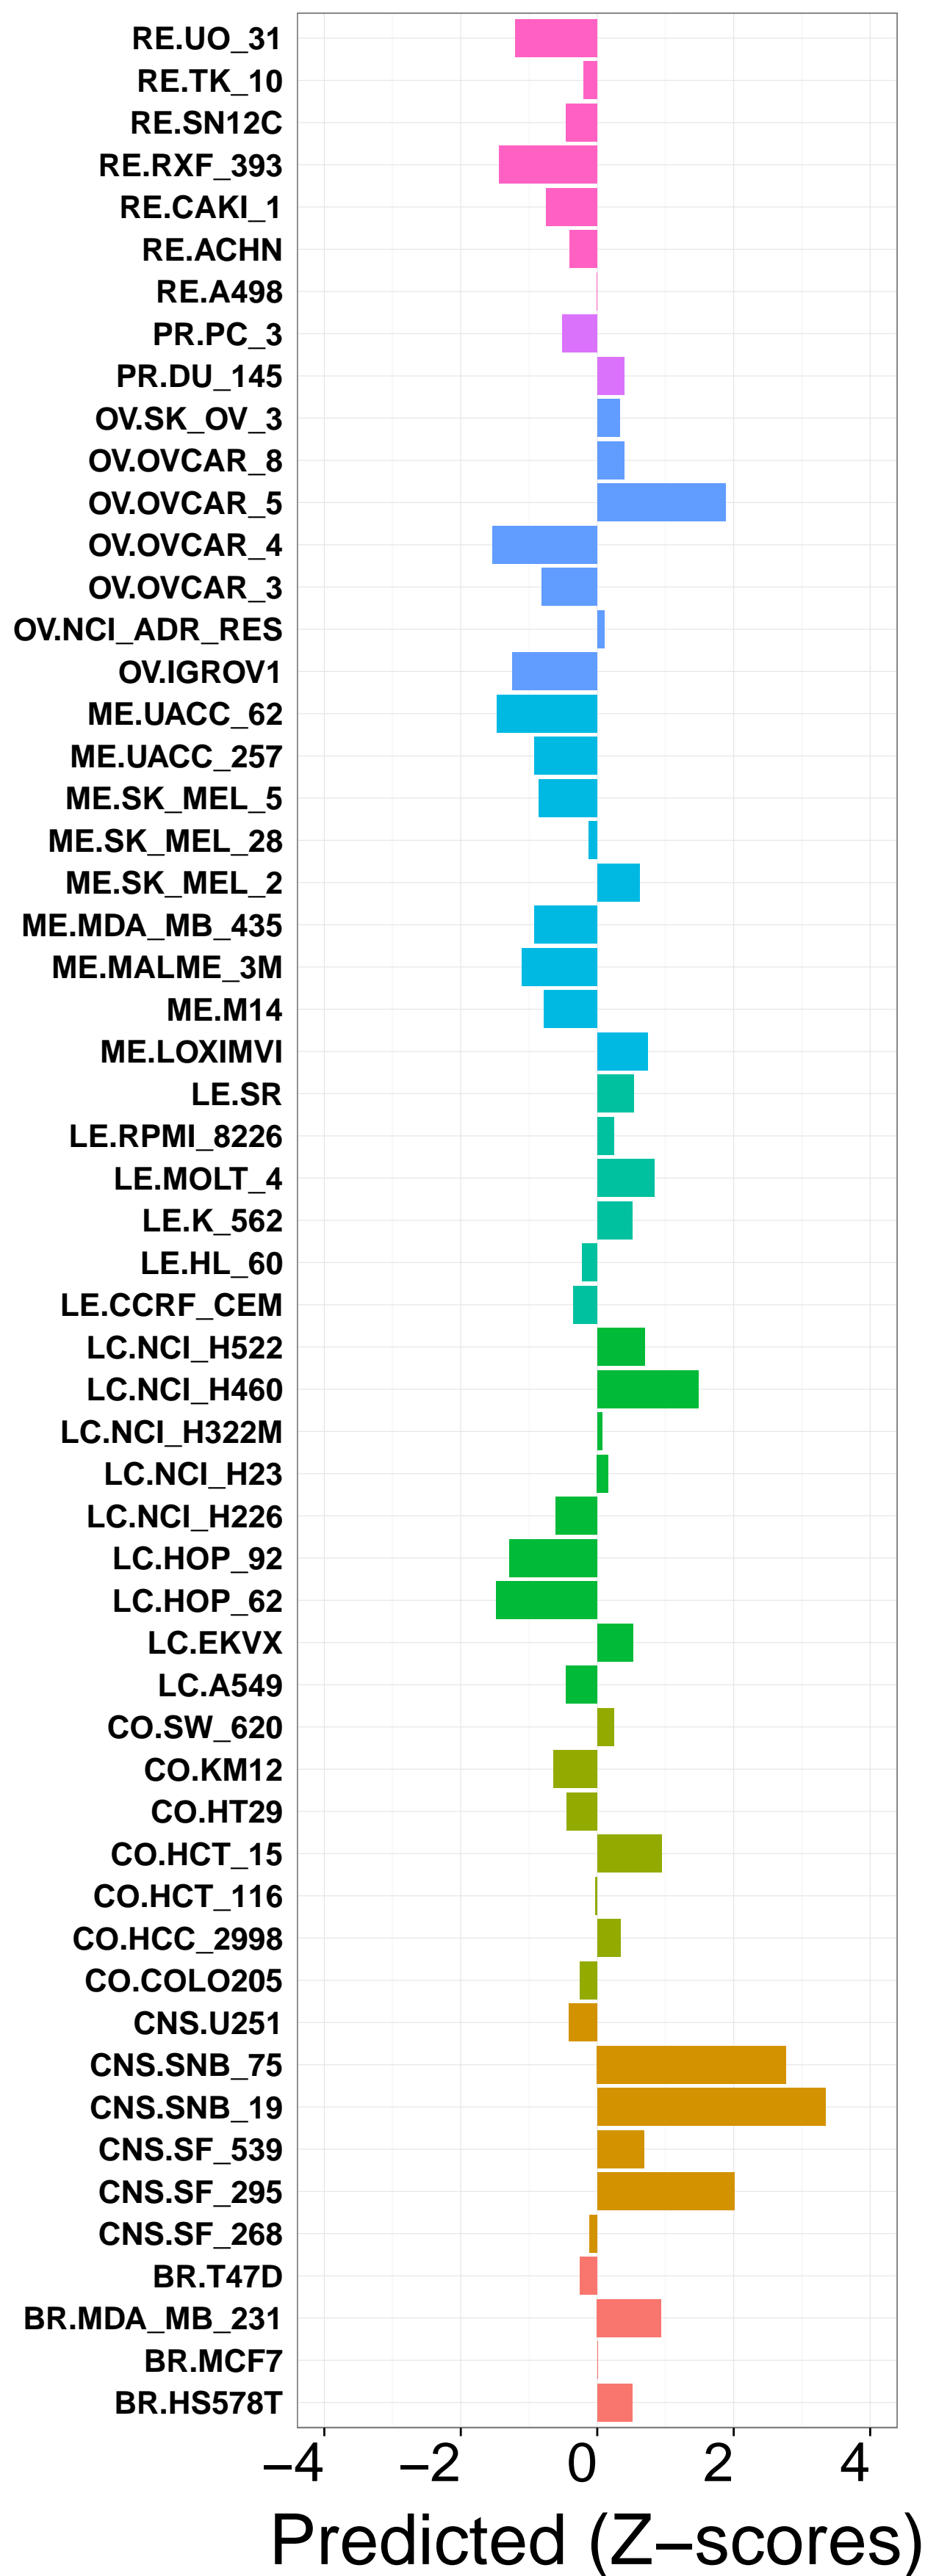

# NSC 122819, Teniposide (LOTO)

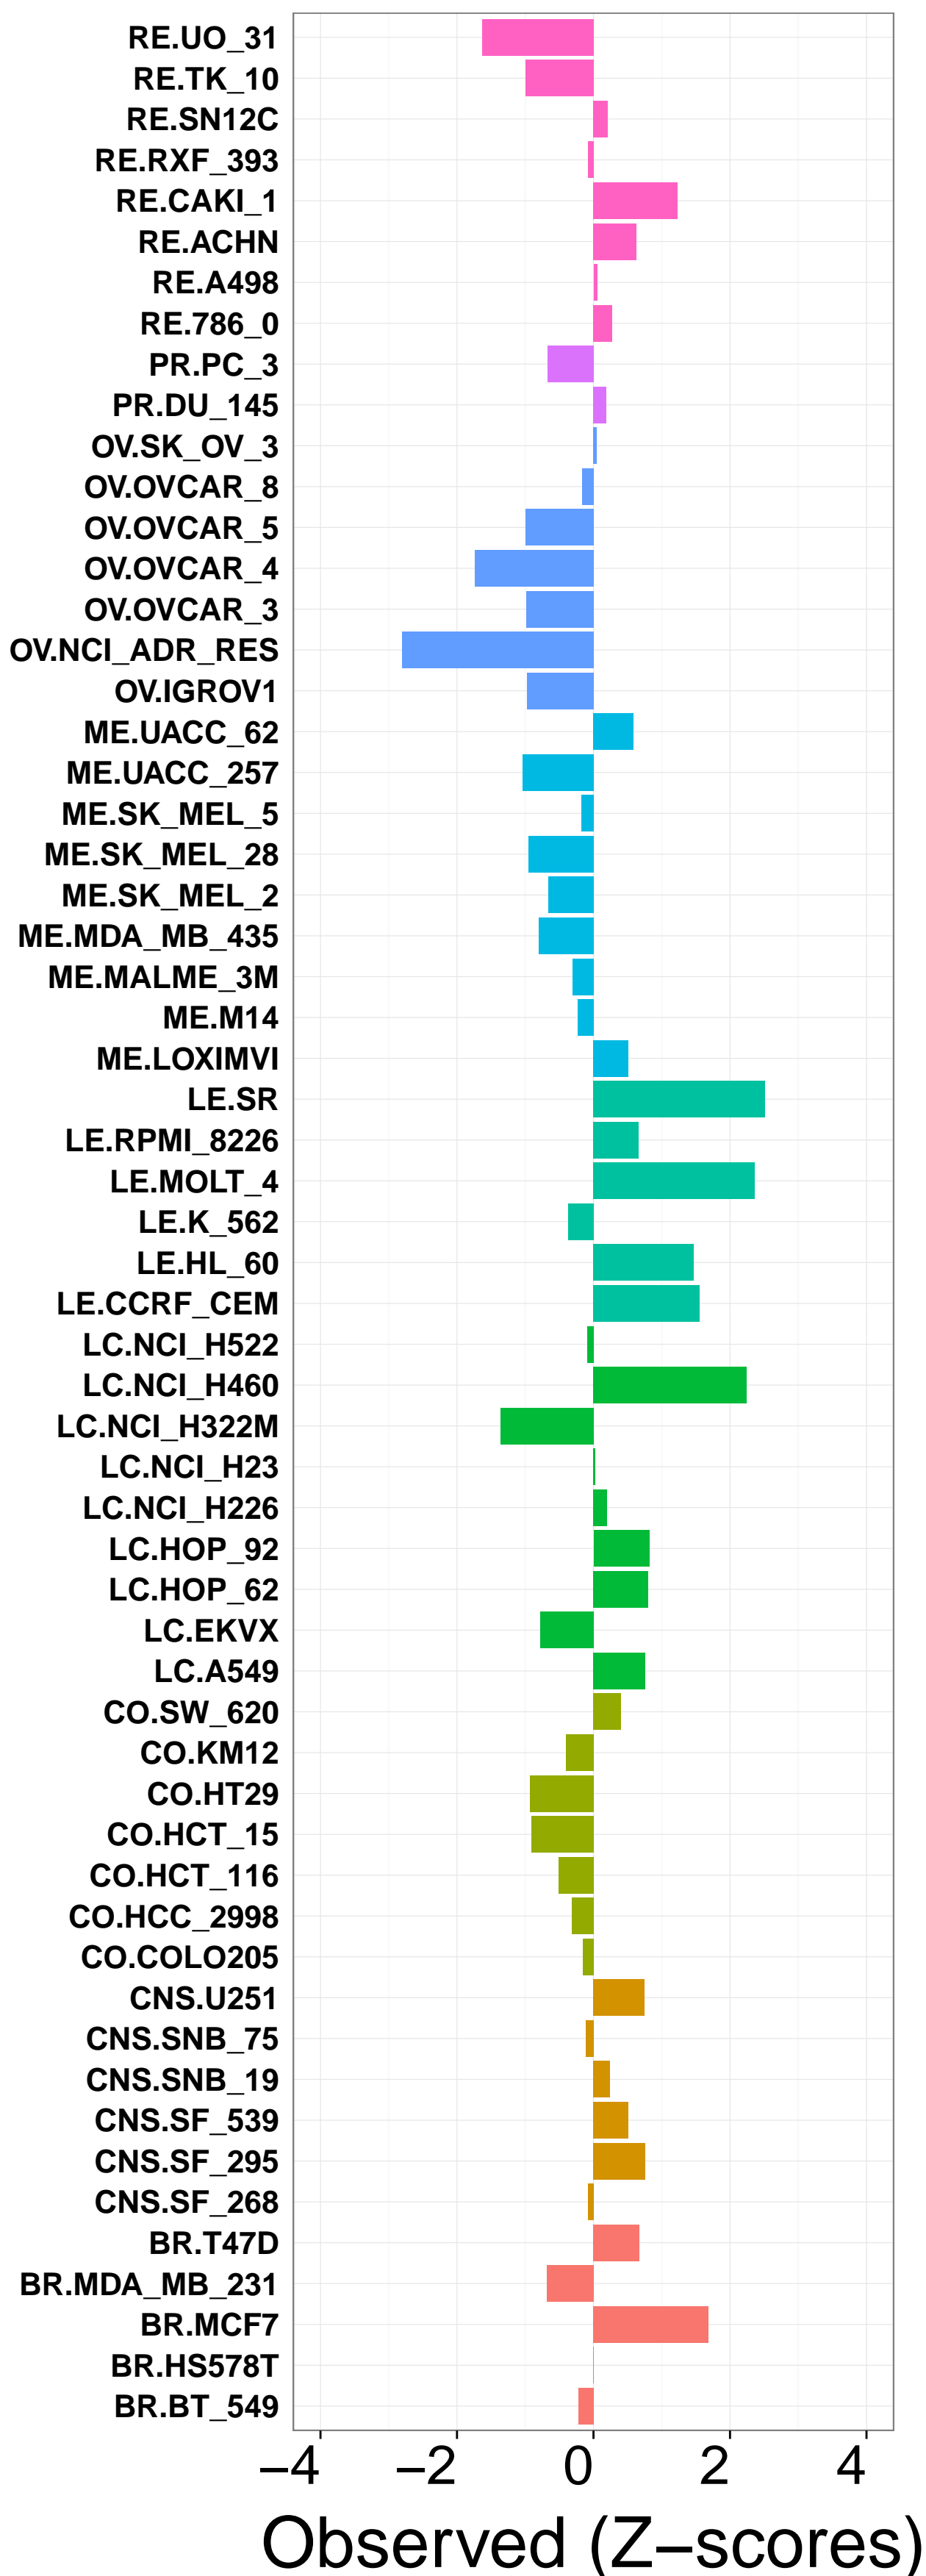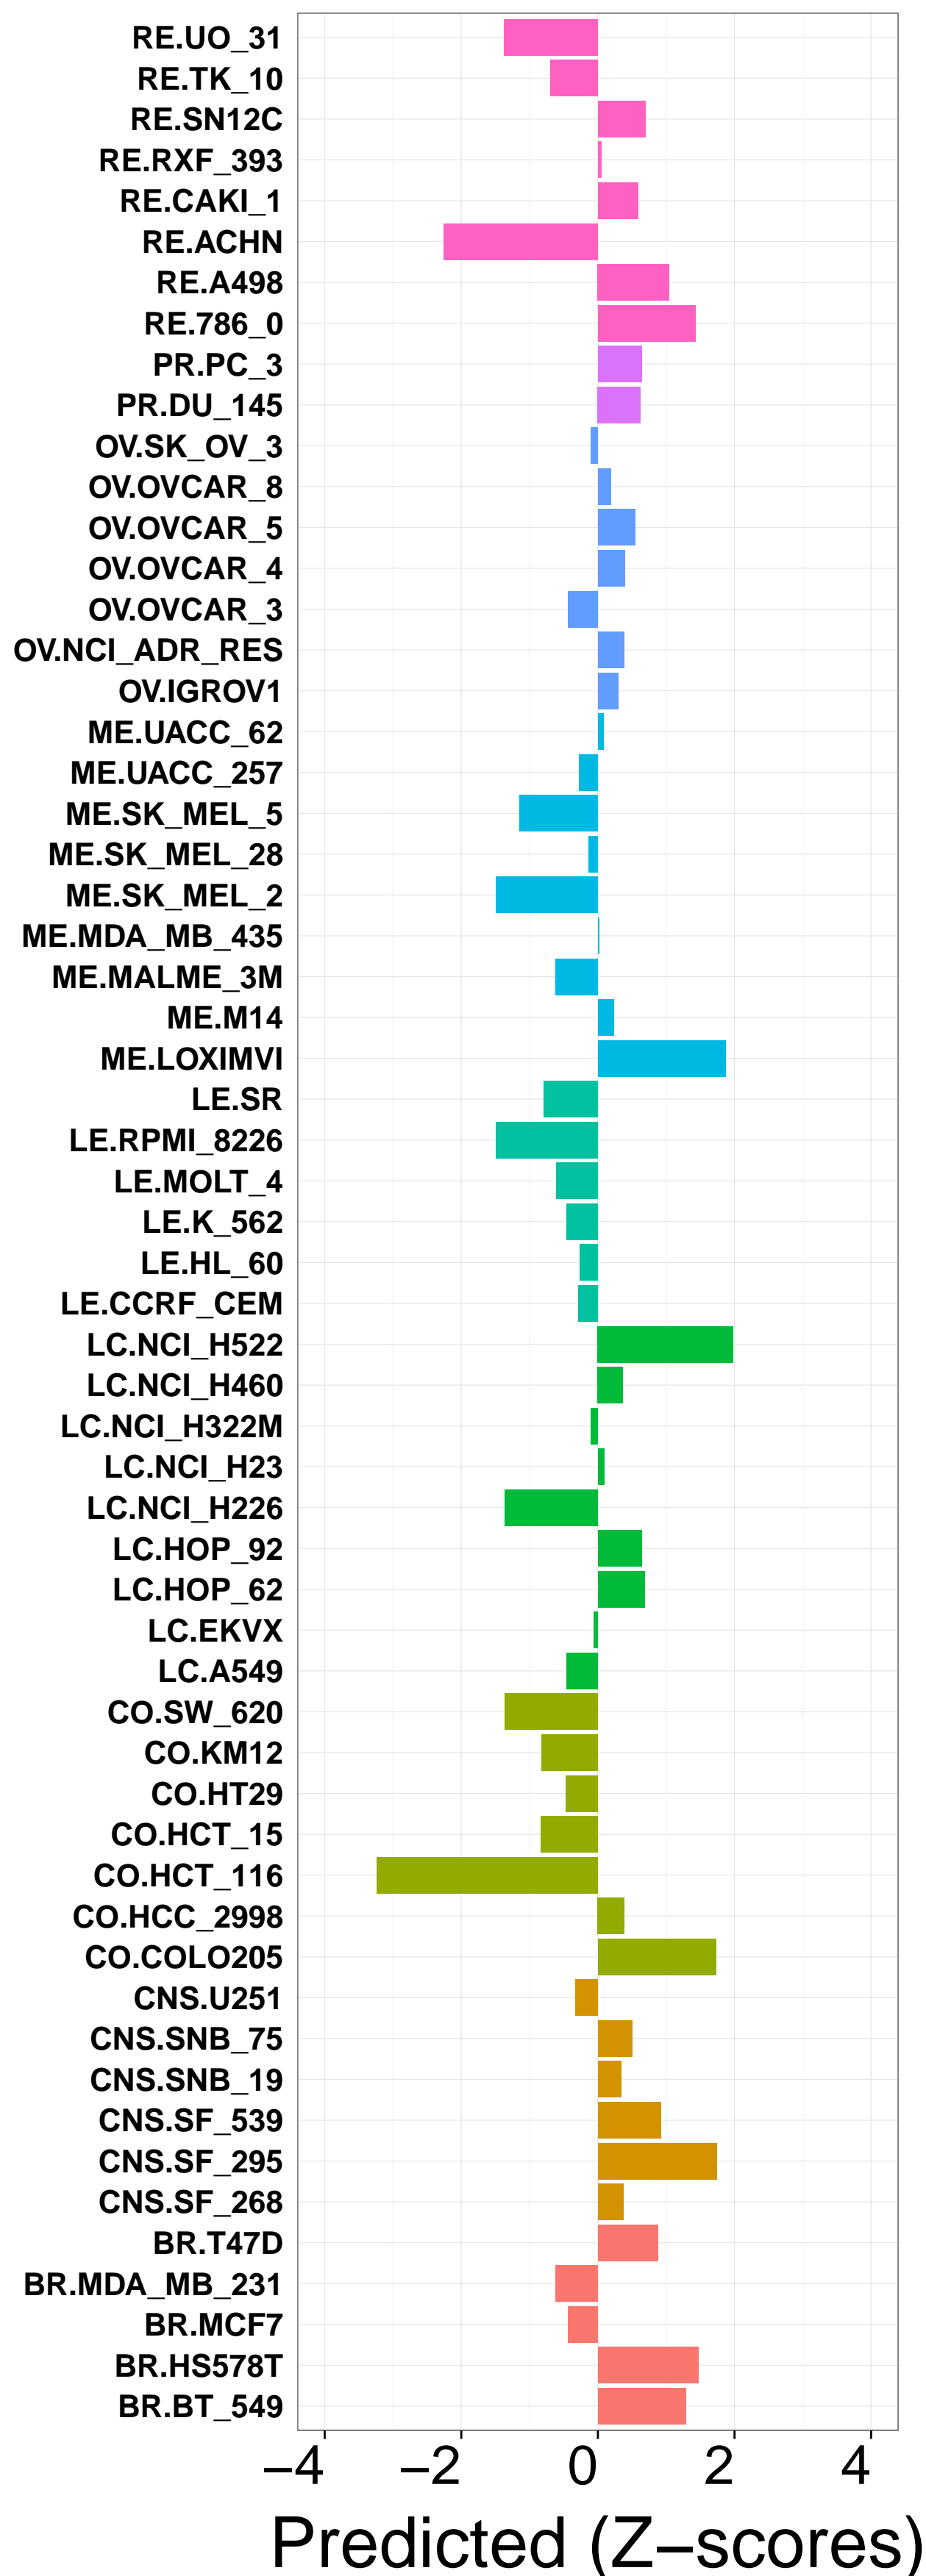

# NSC 123127, Doxorubicin\_Hydrochloride (LOTO)

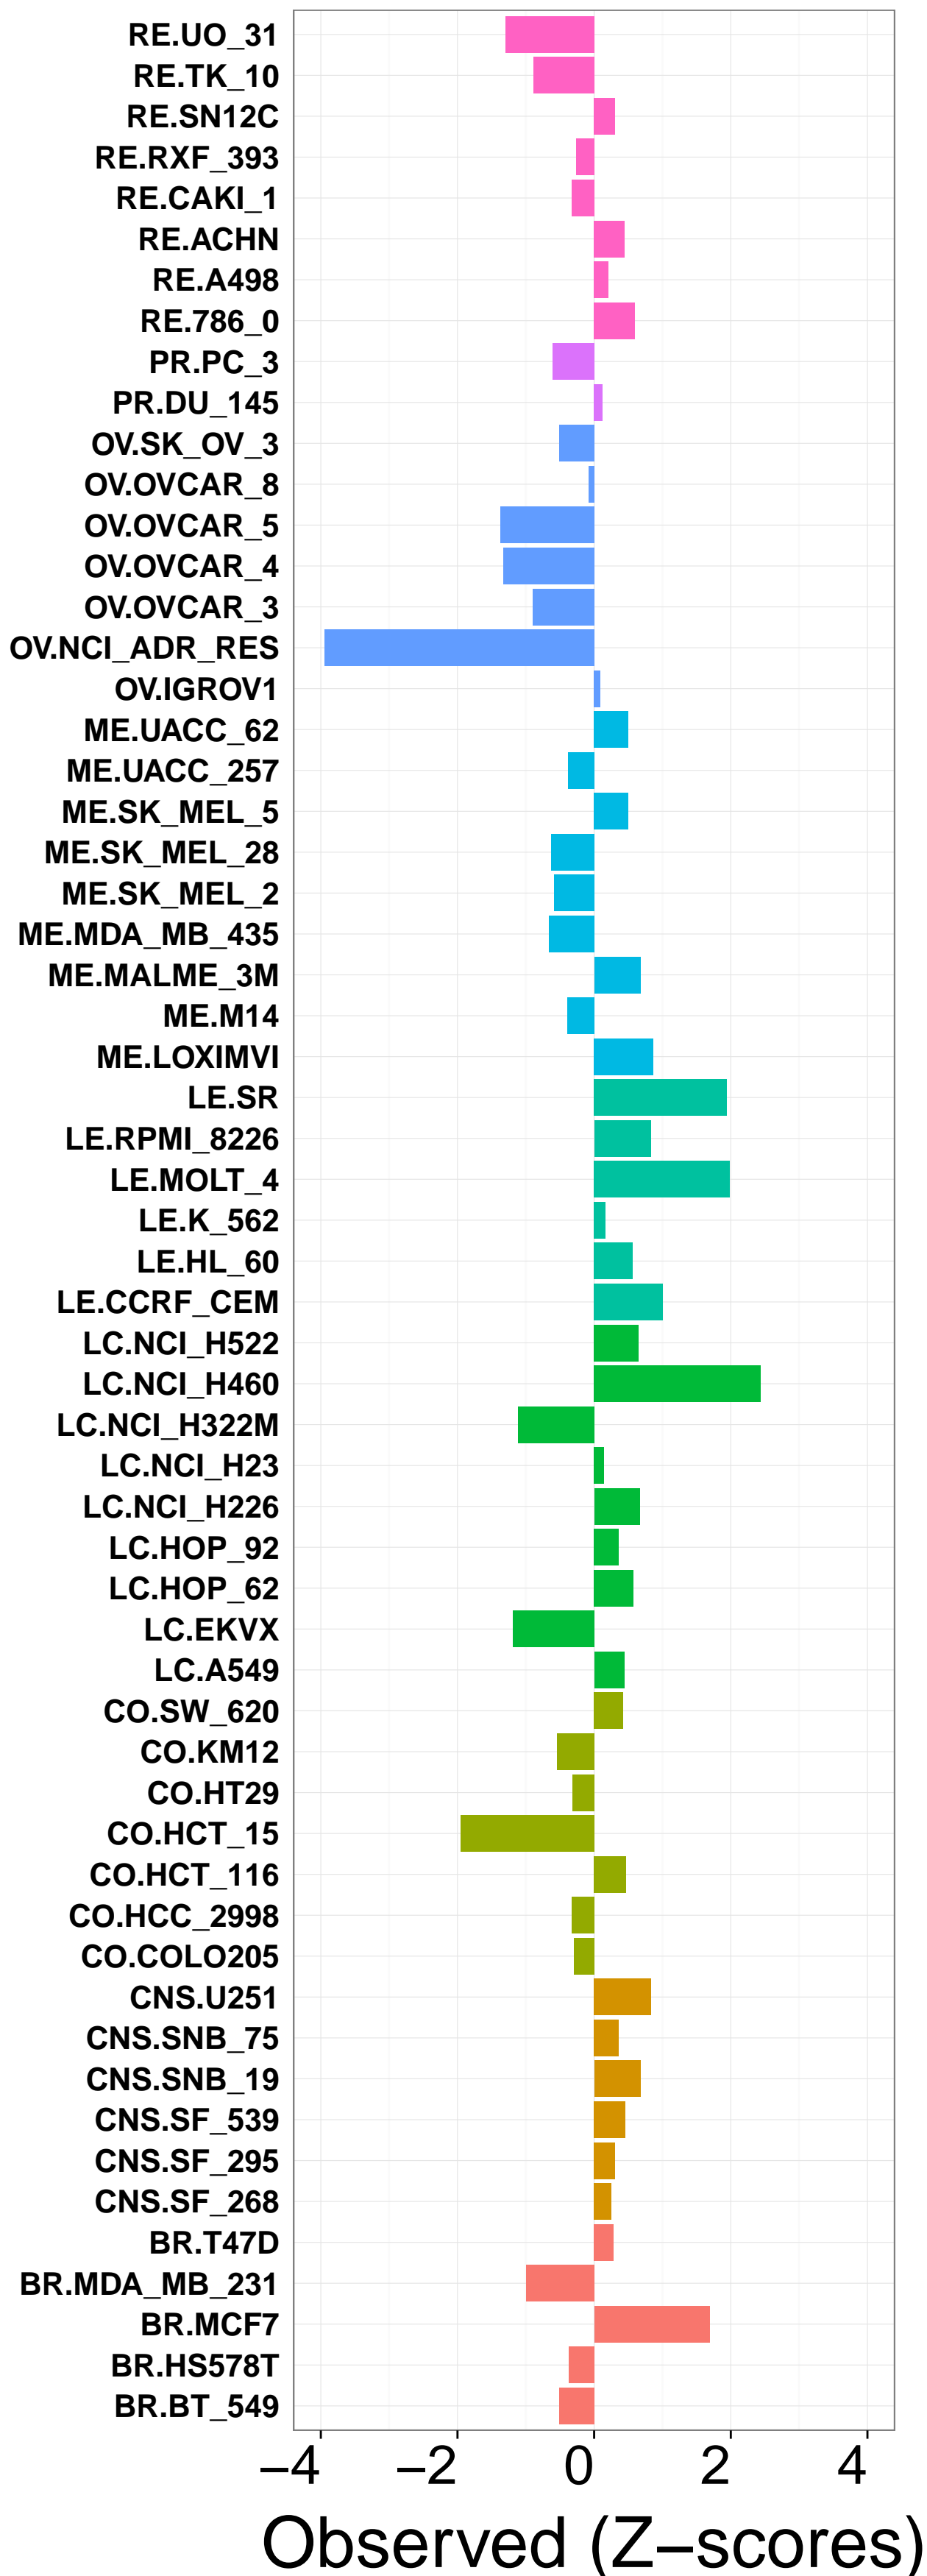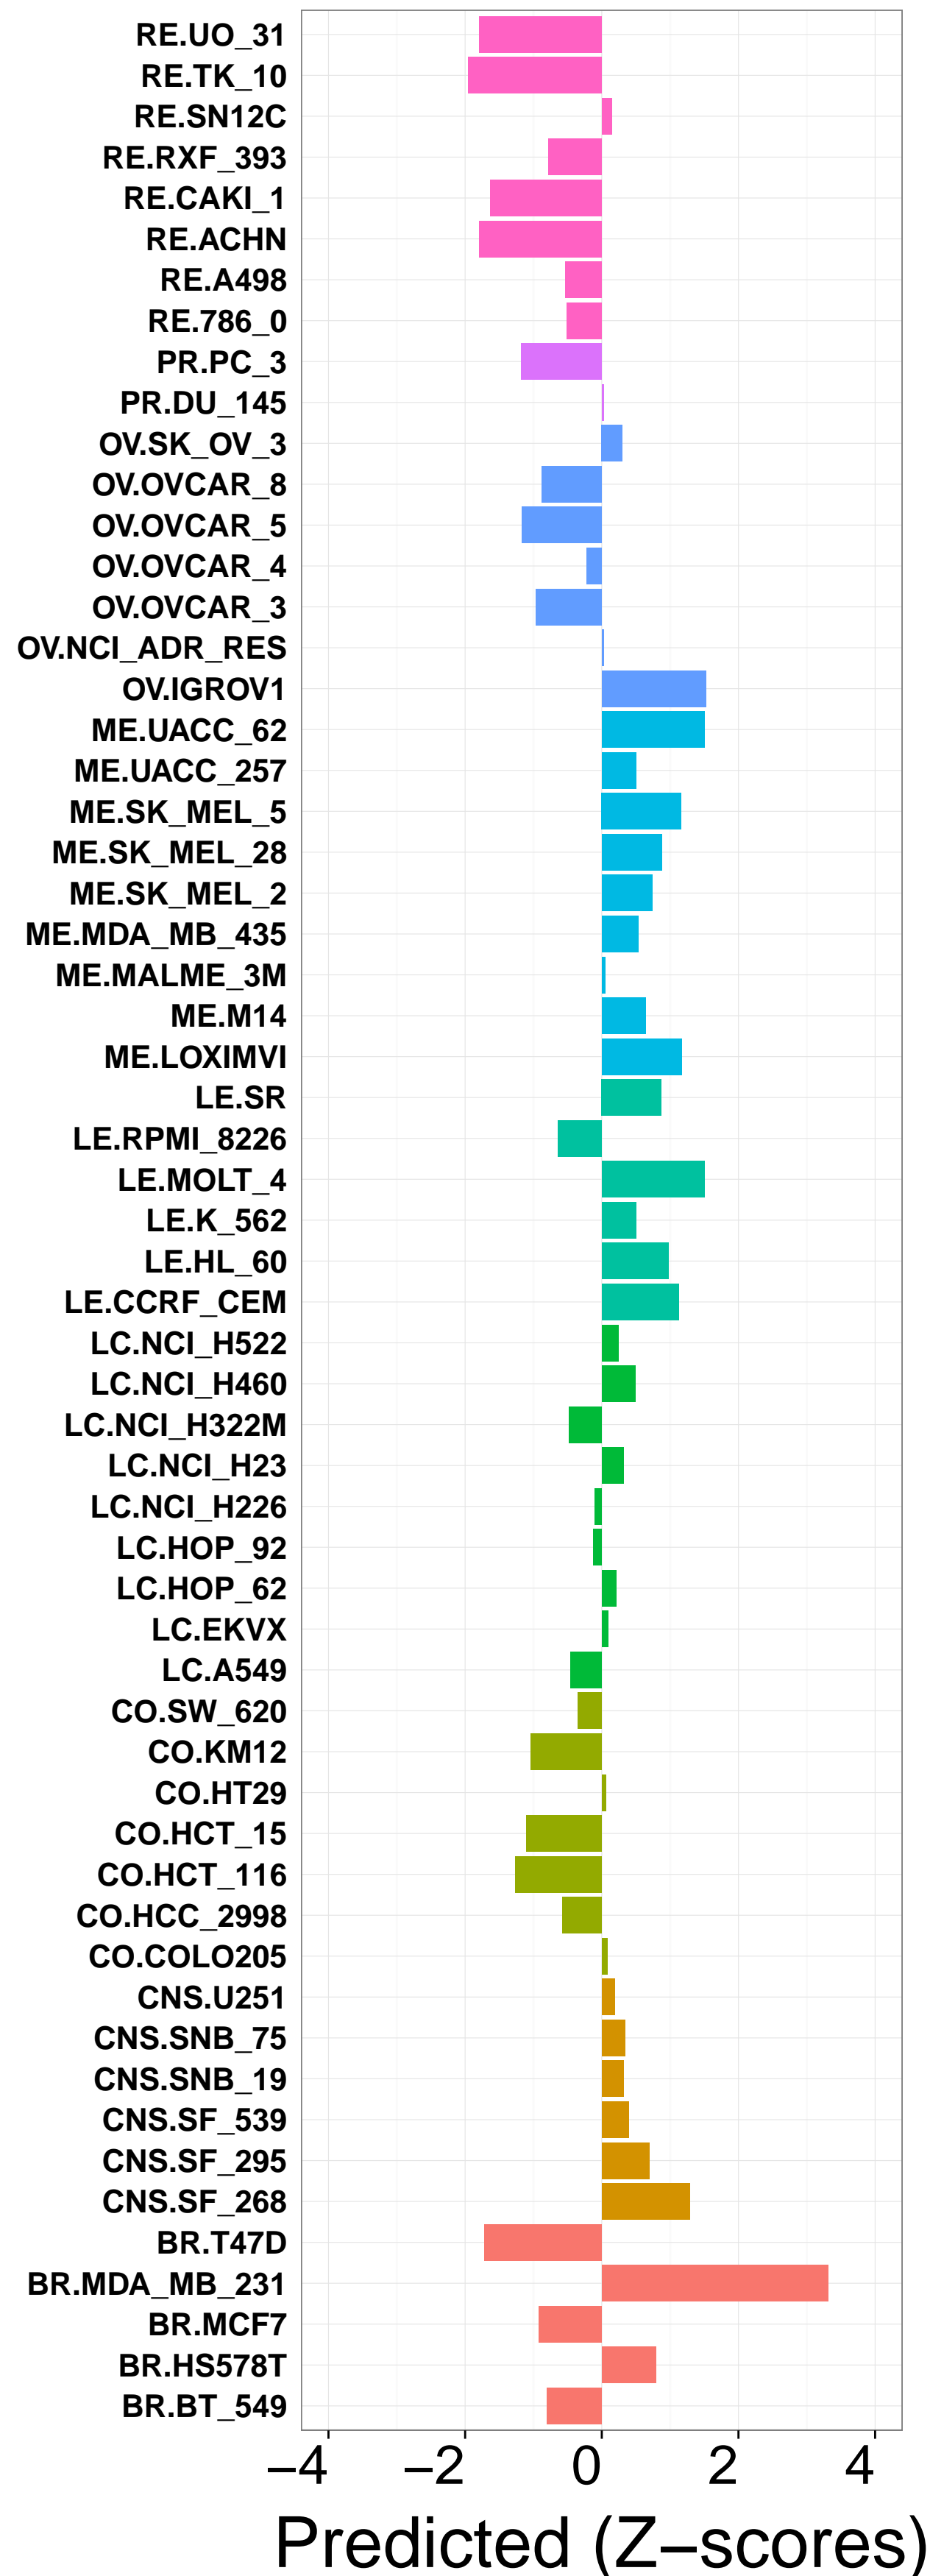

# NSC 125973, (LOTO)

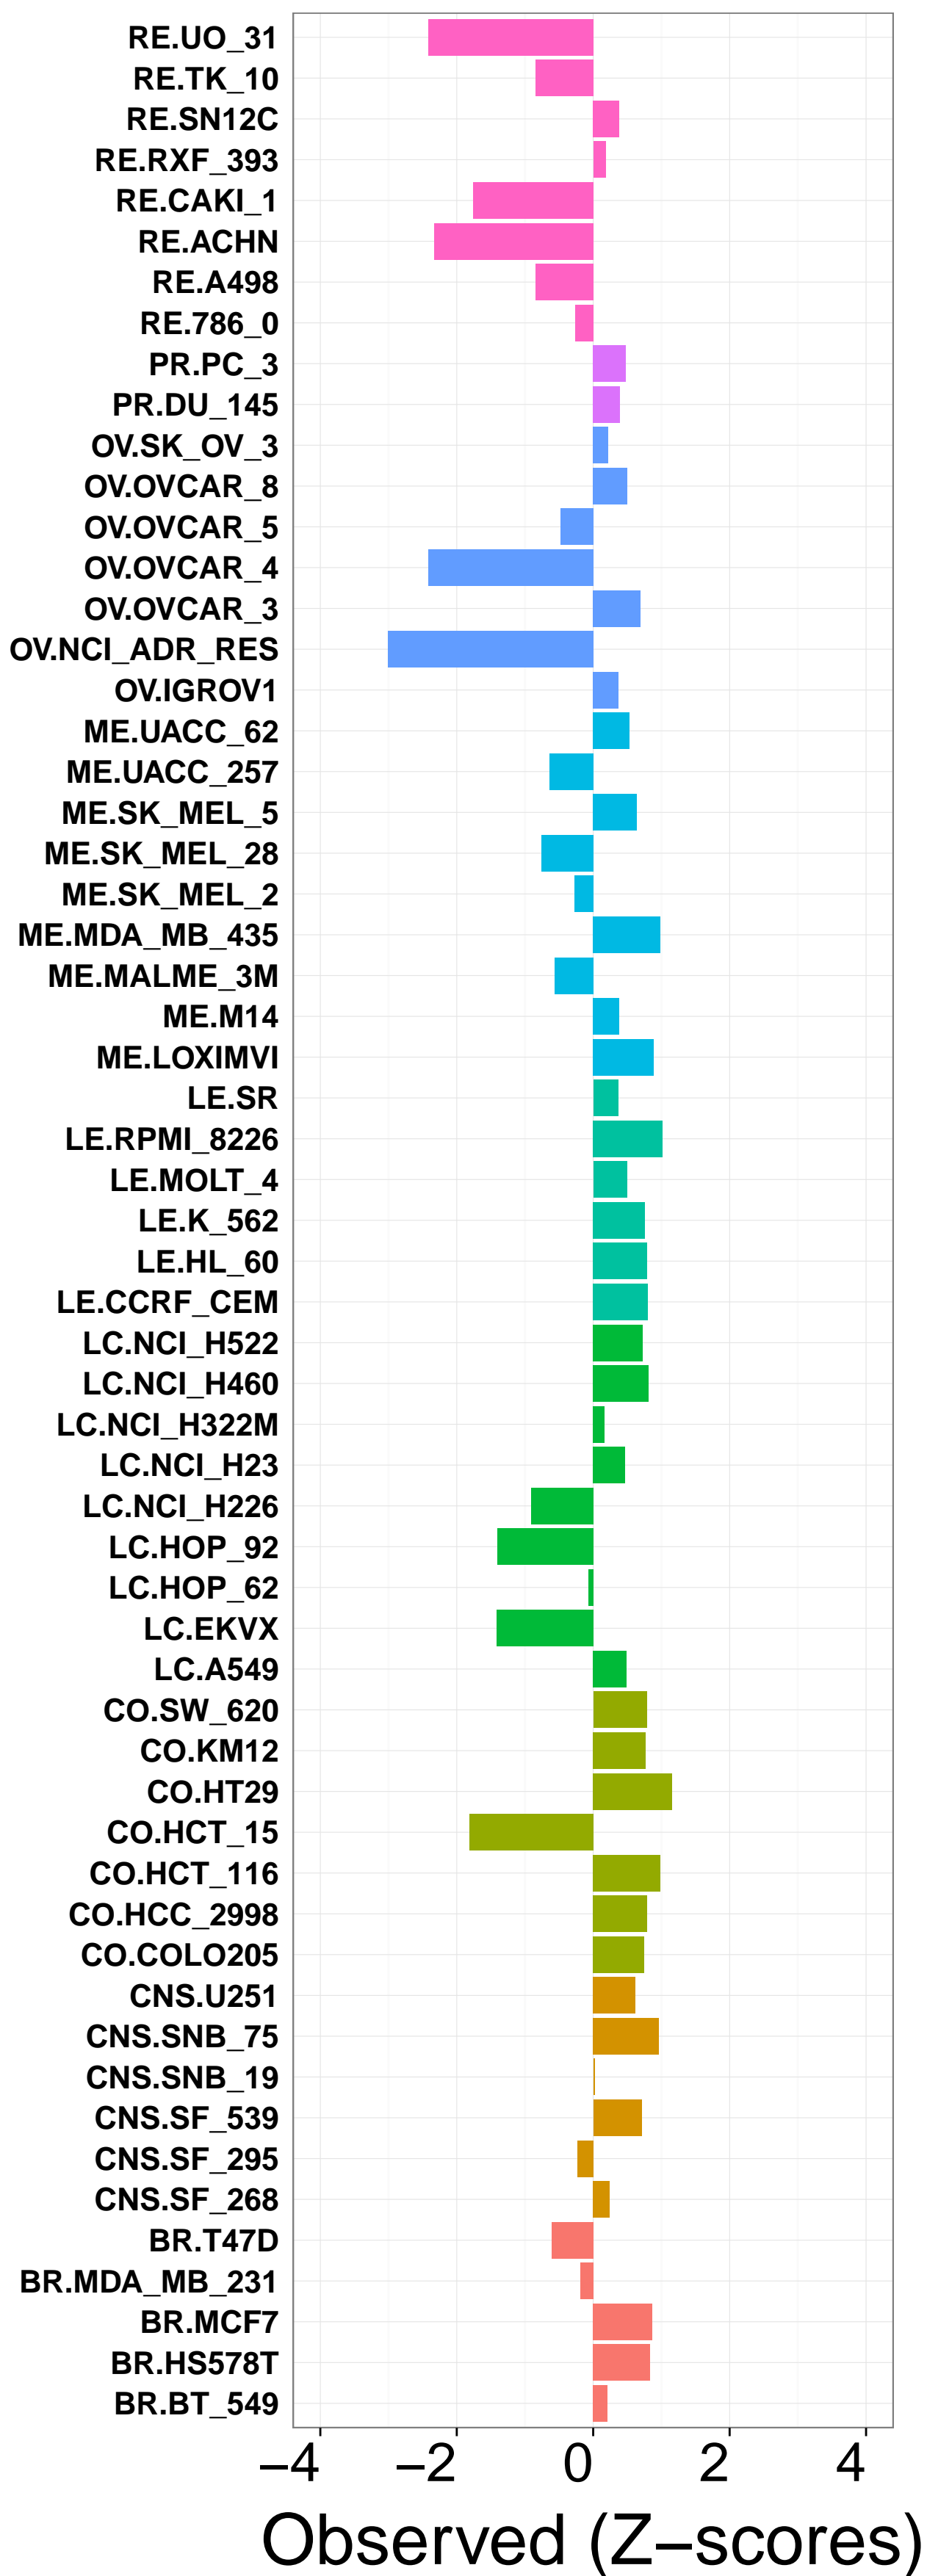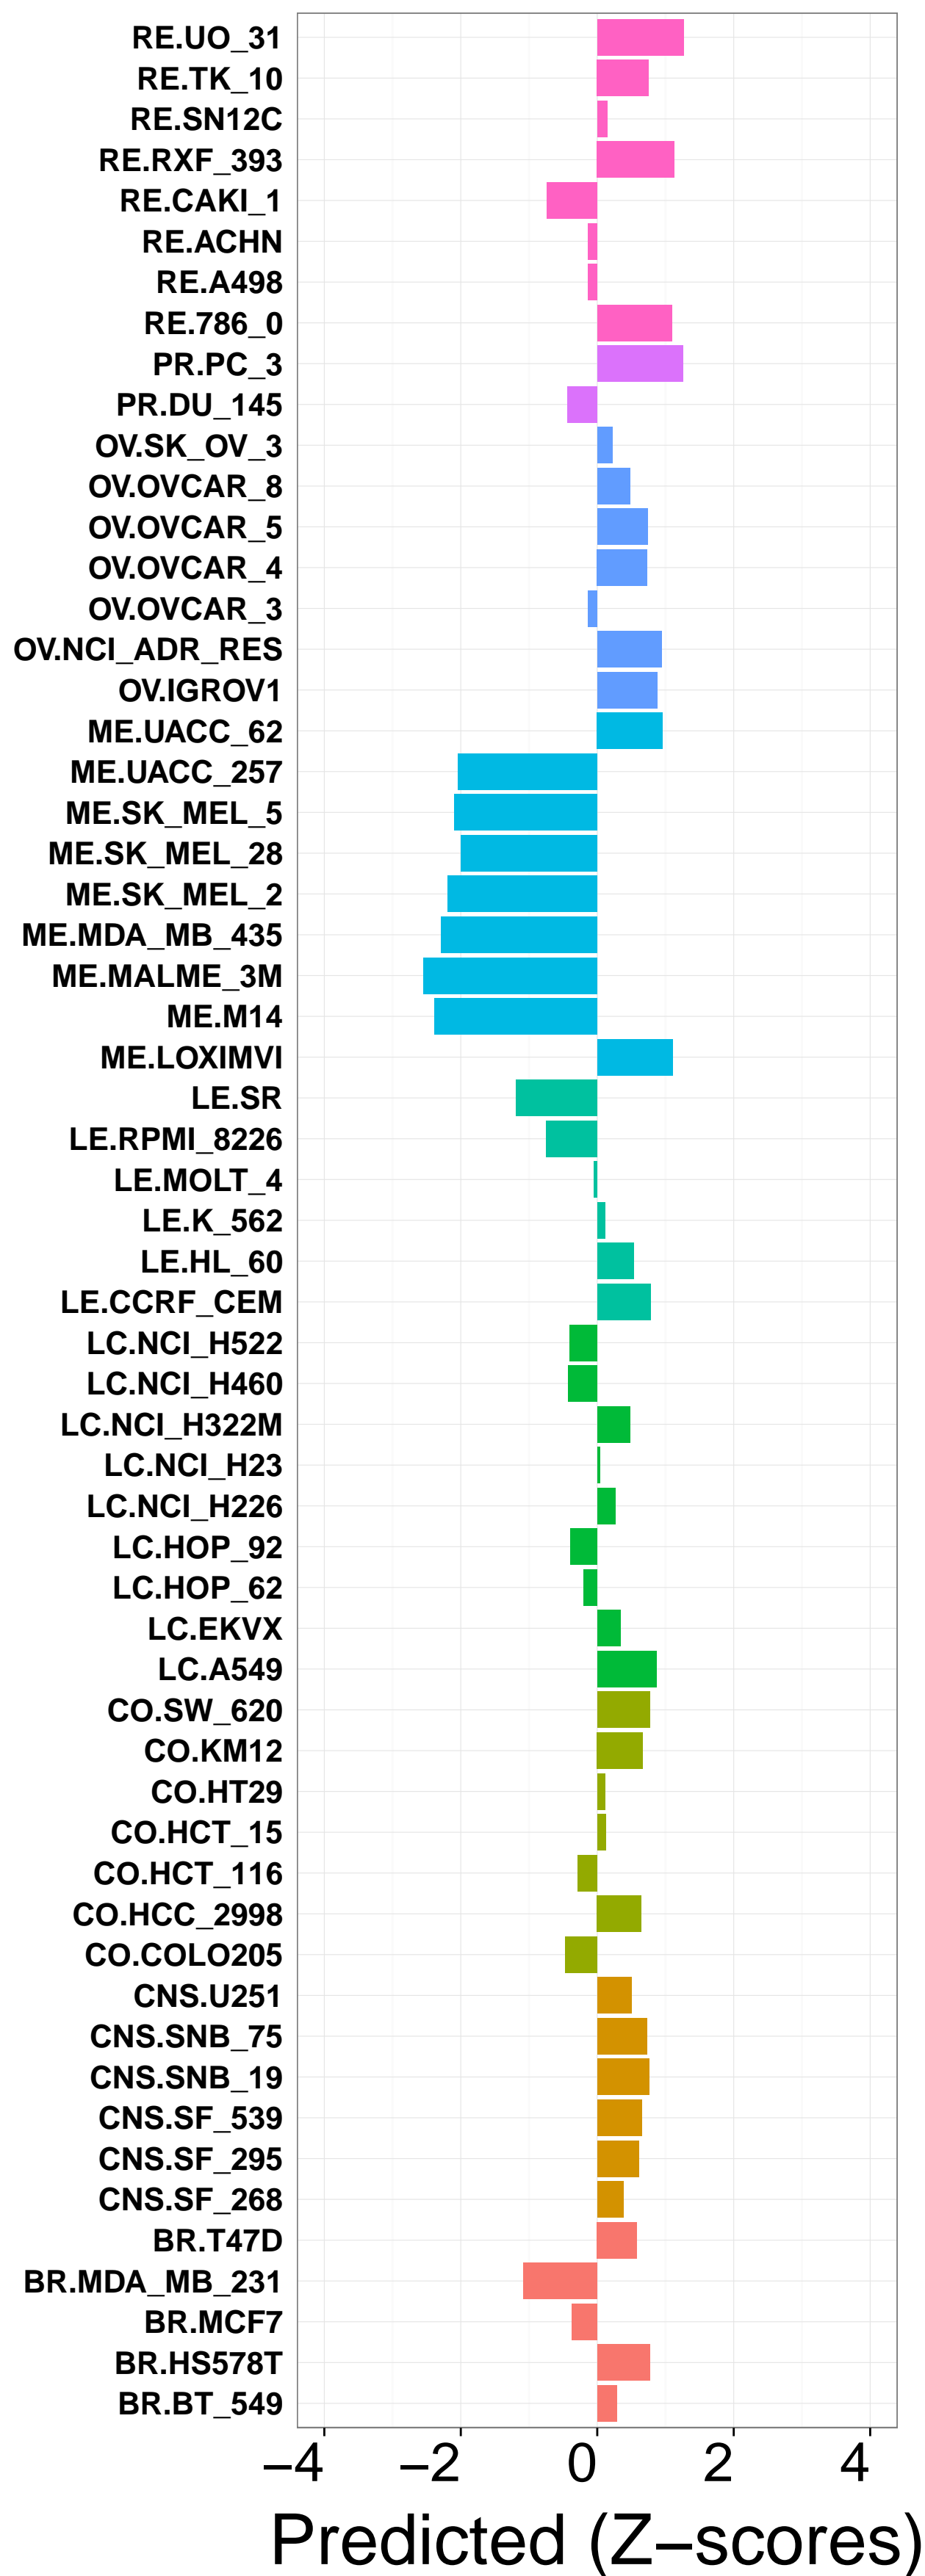



# NSC 127716, Decitabine (LOTO)

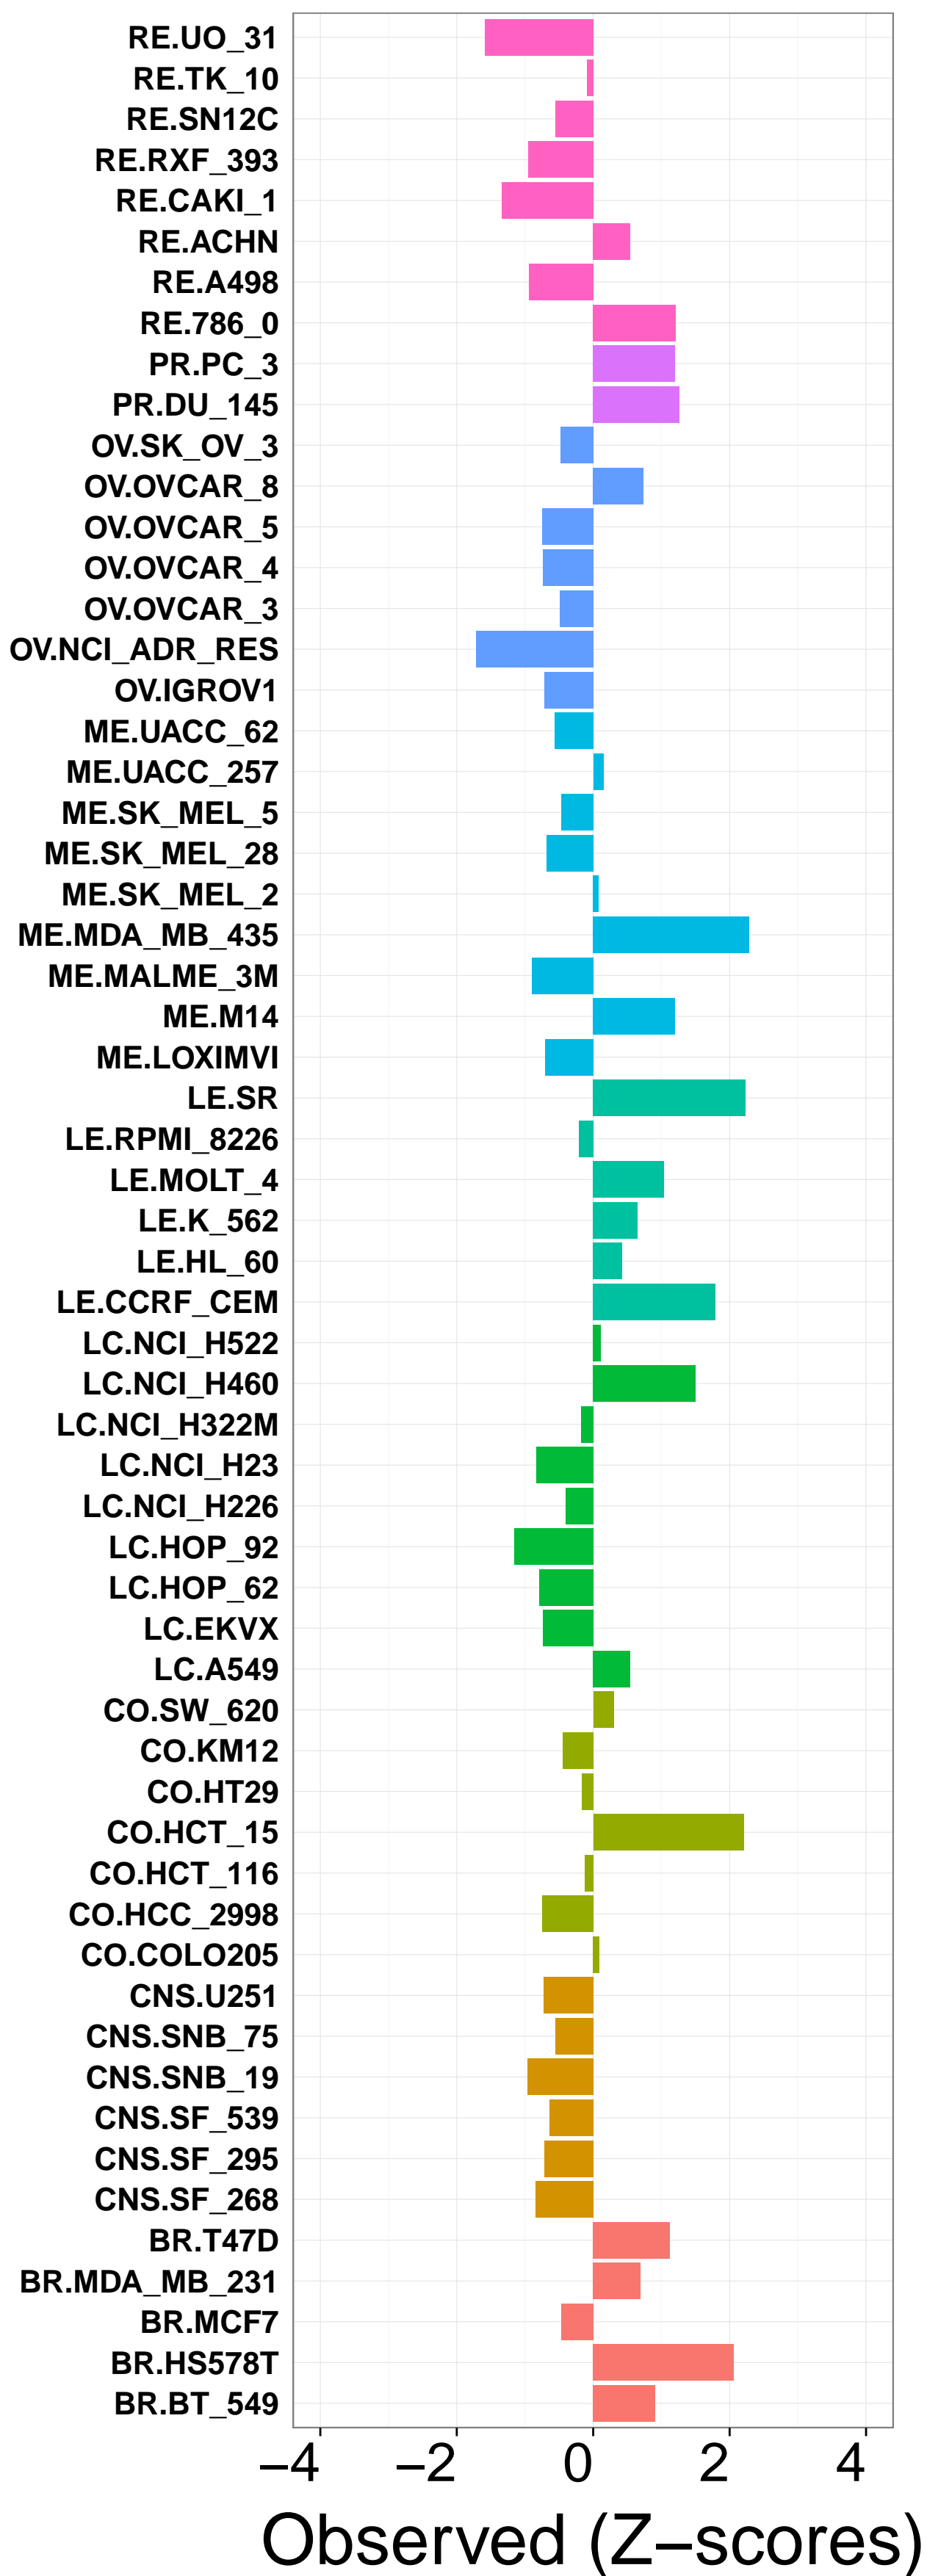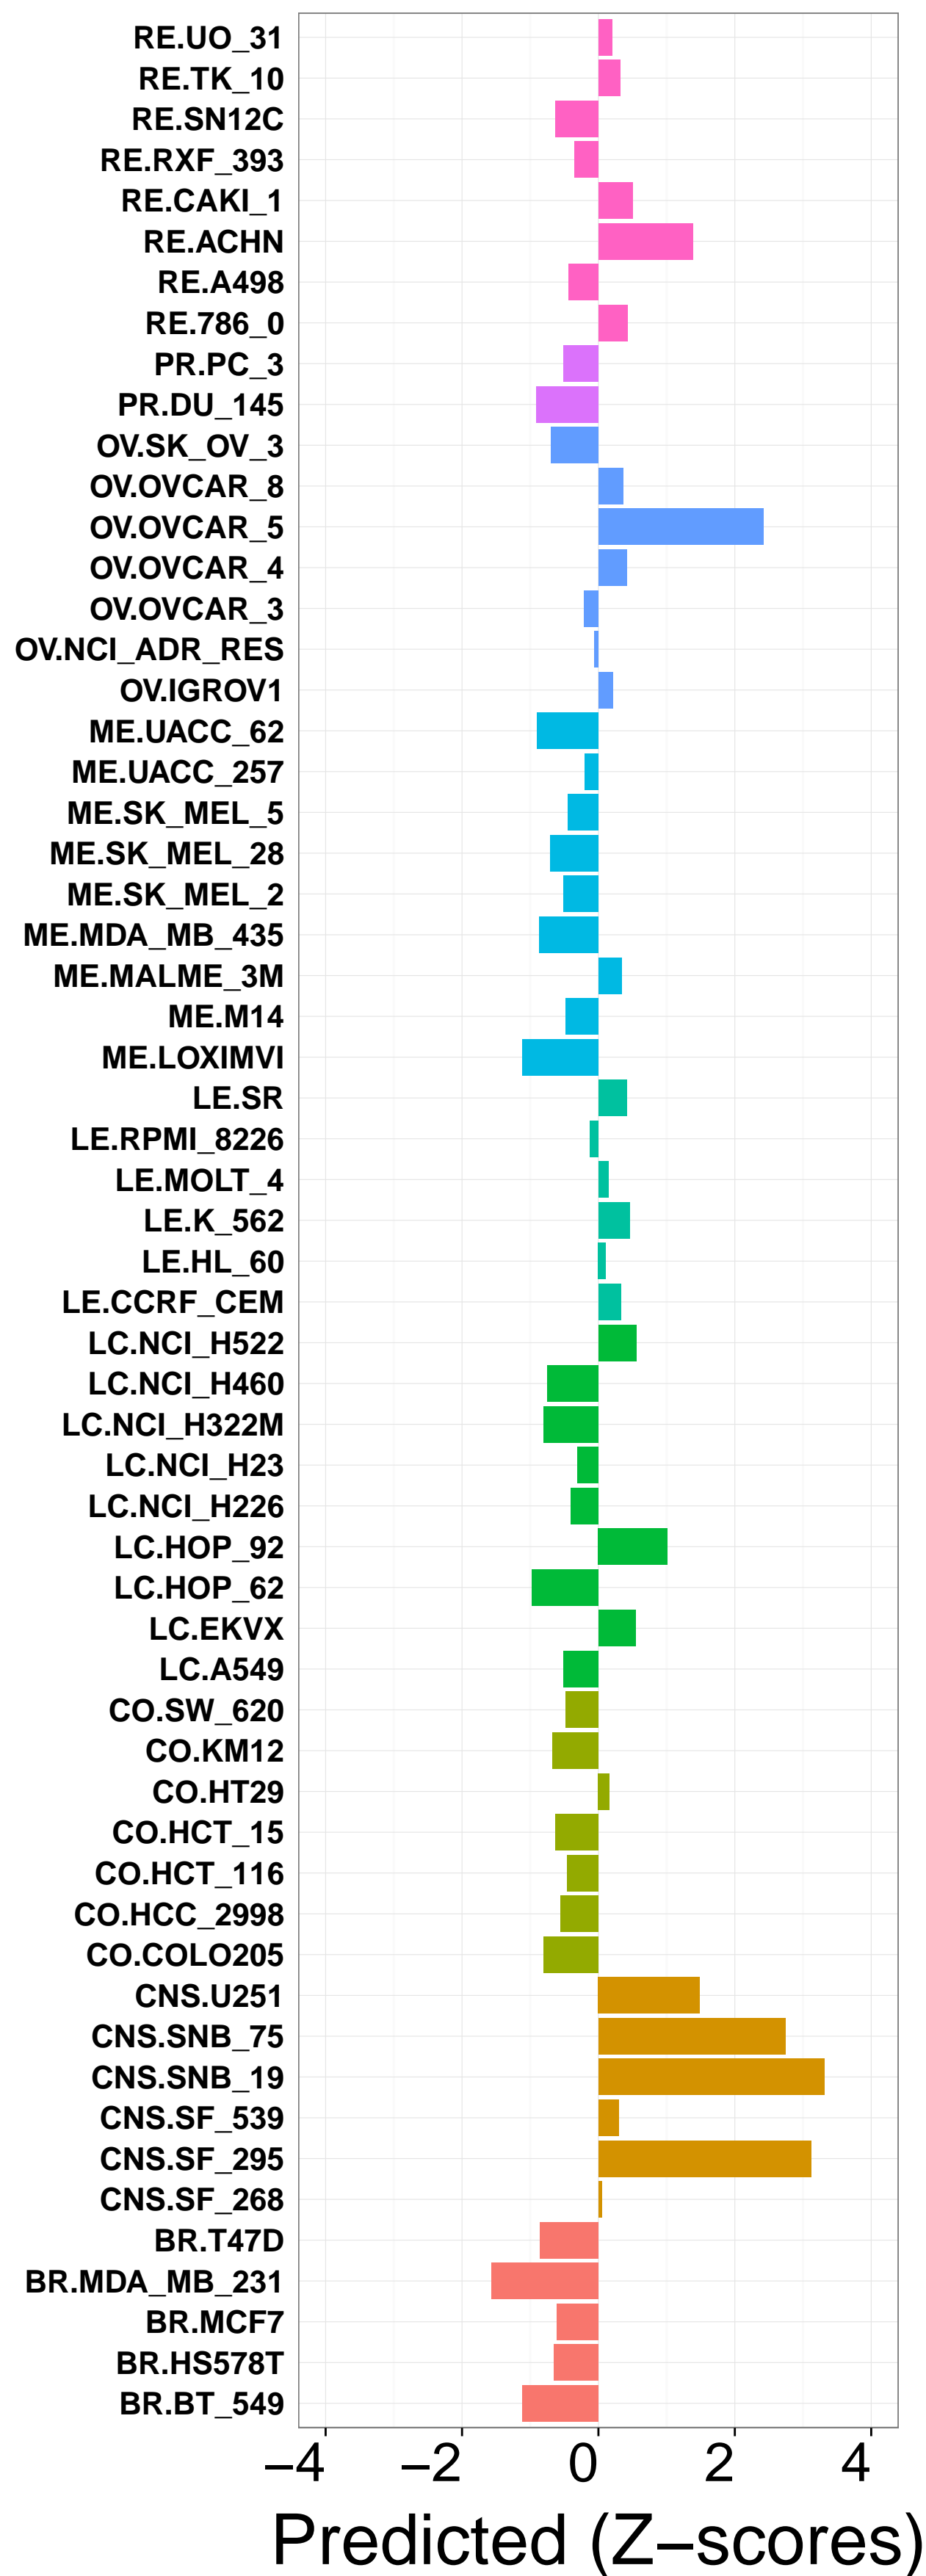

# NSC 141540, (LOTO)

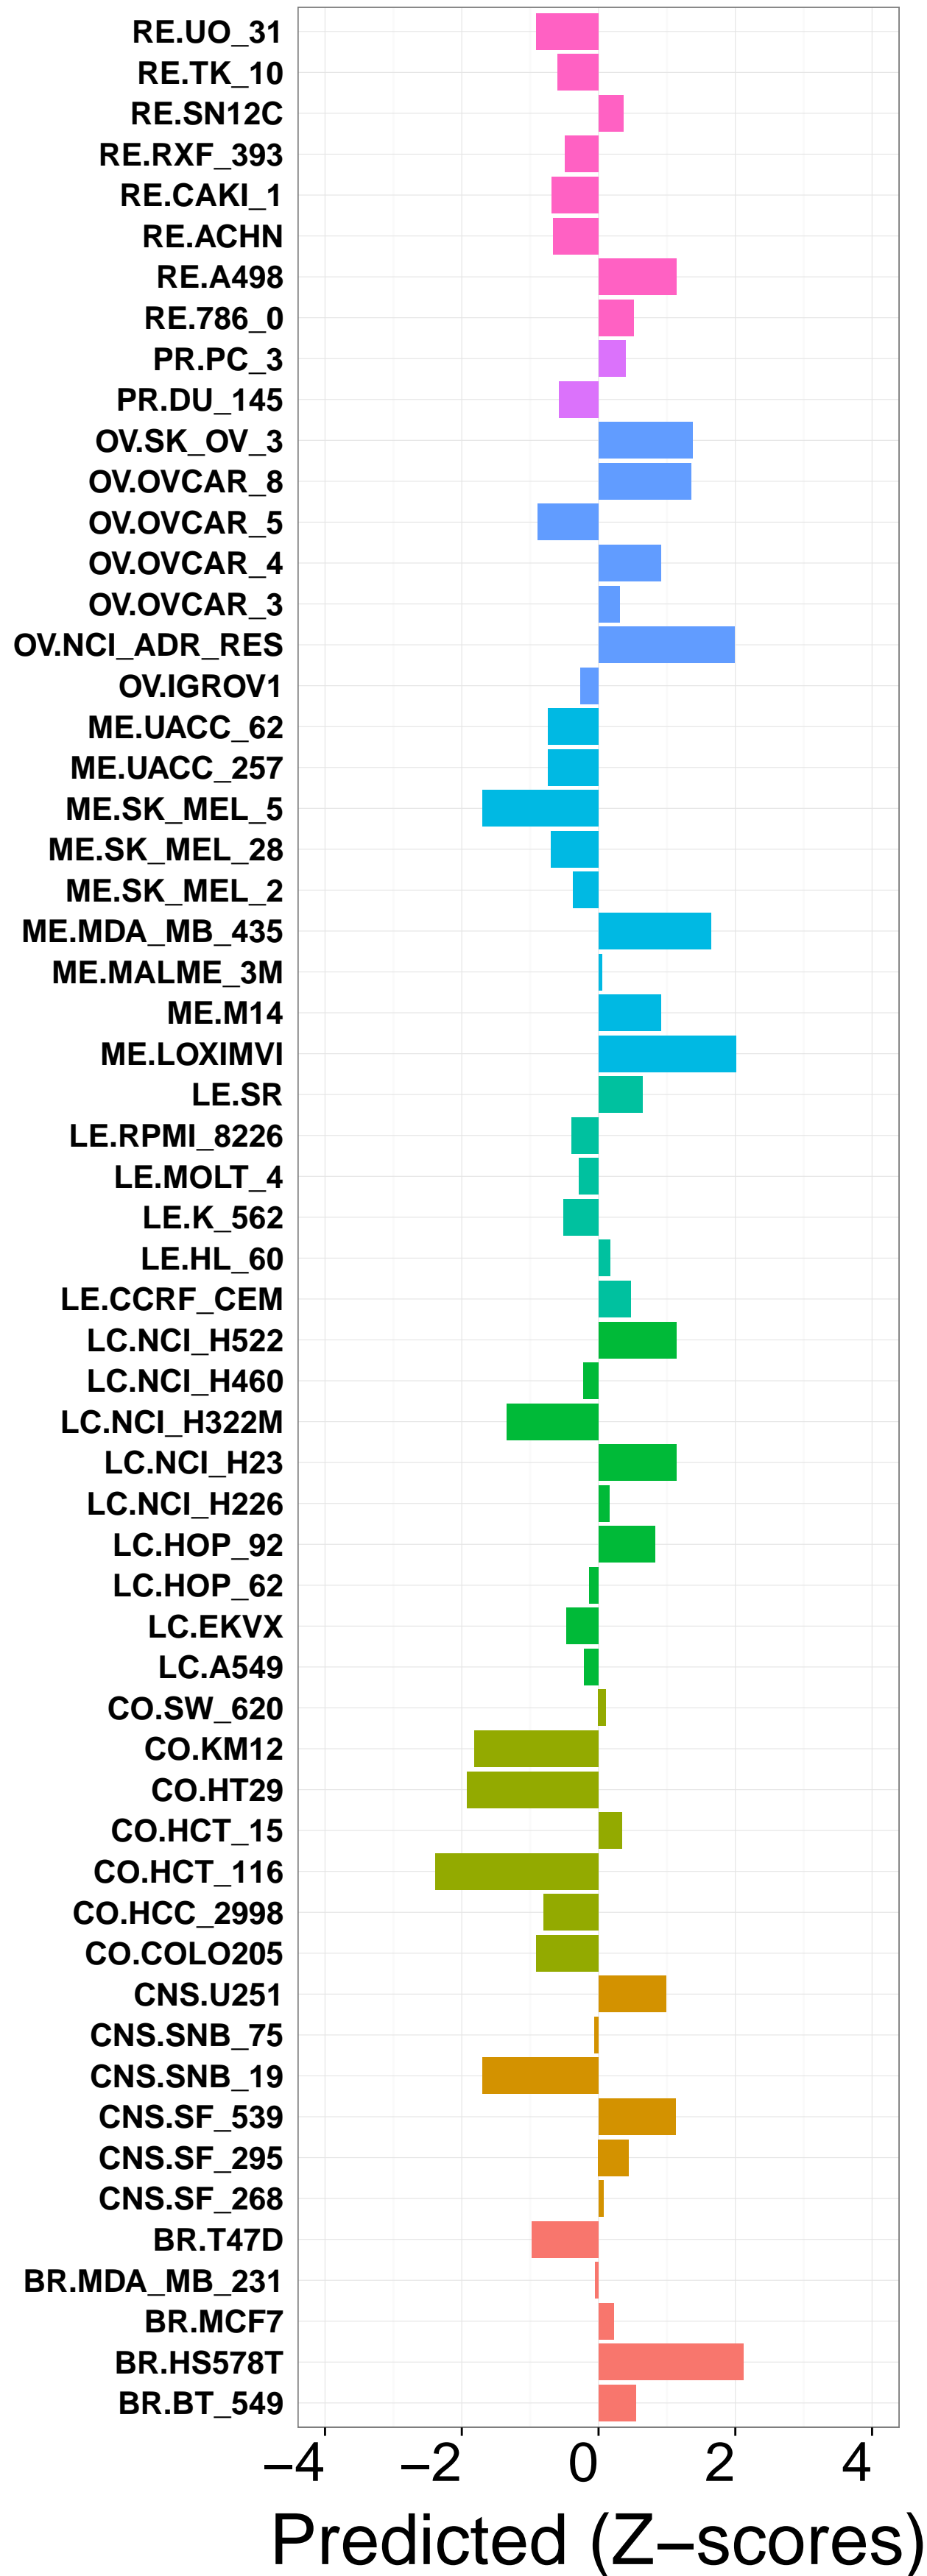

# NSC 141633, (LOTO)

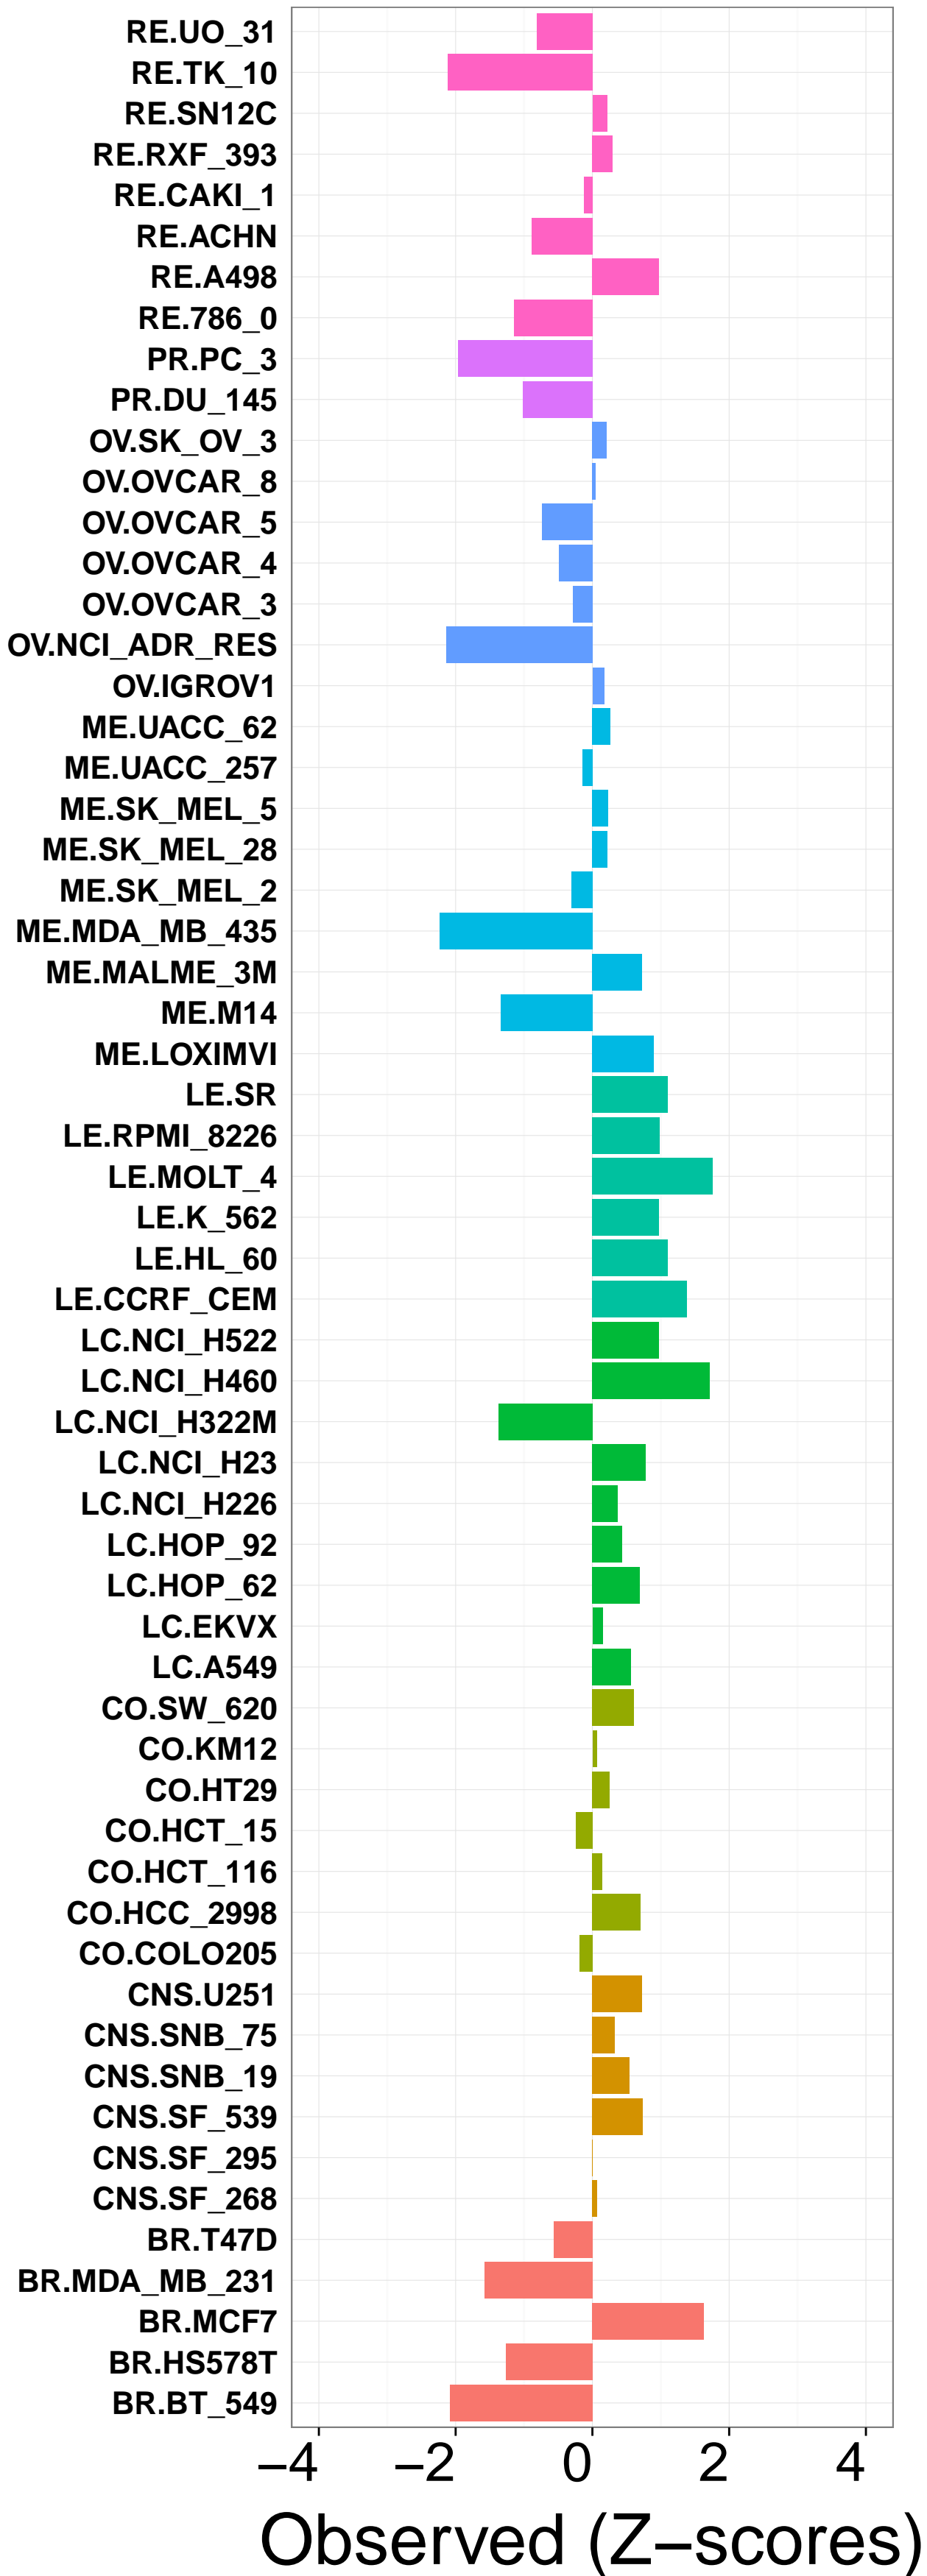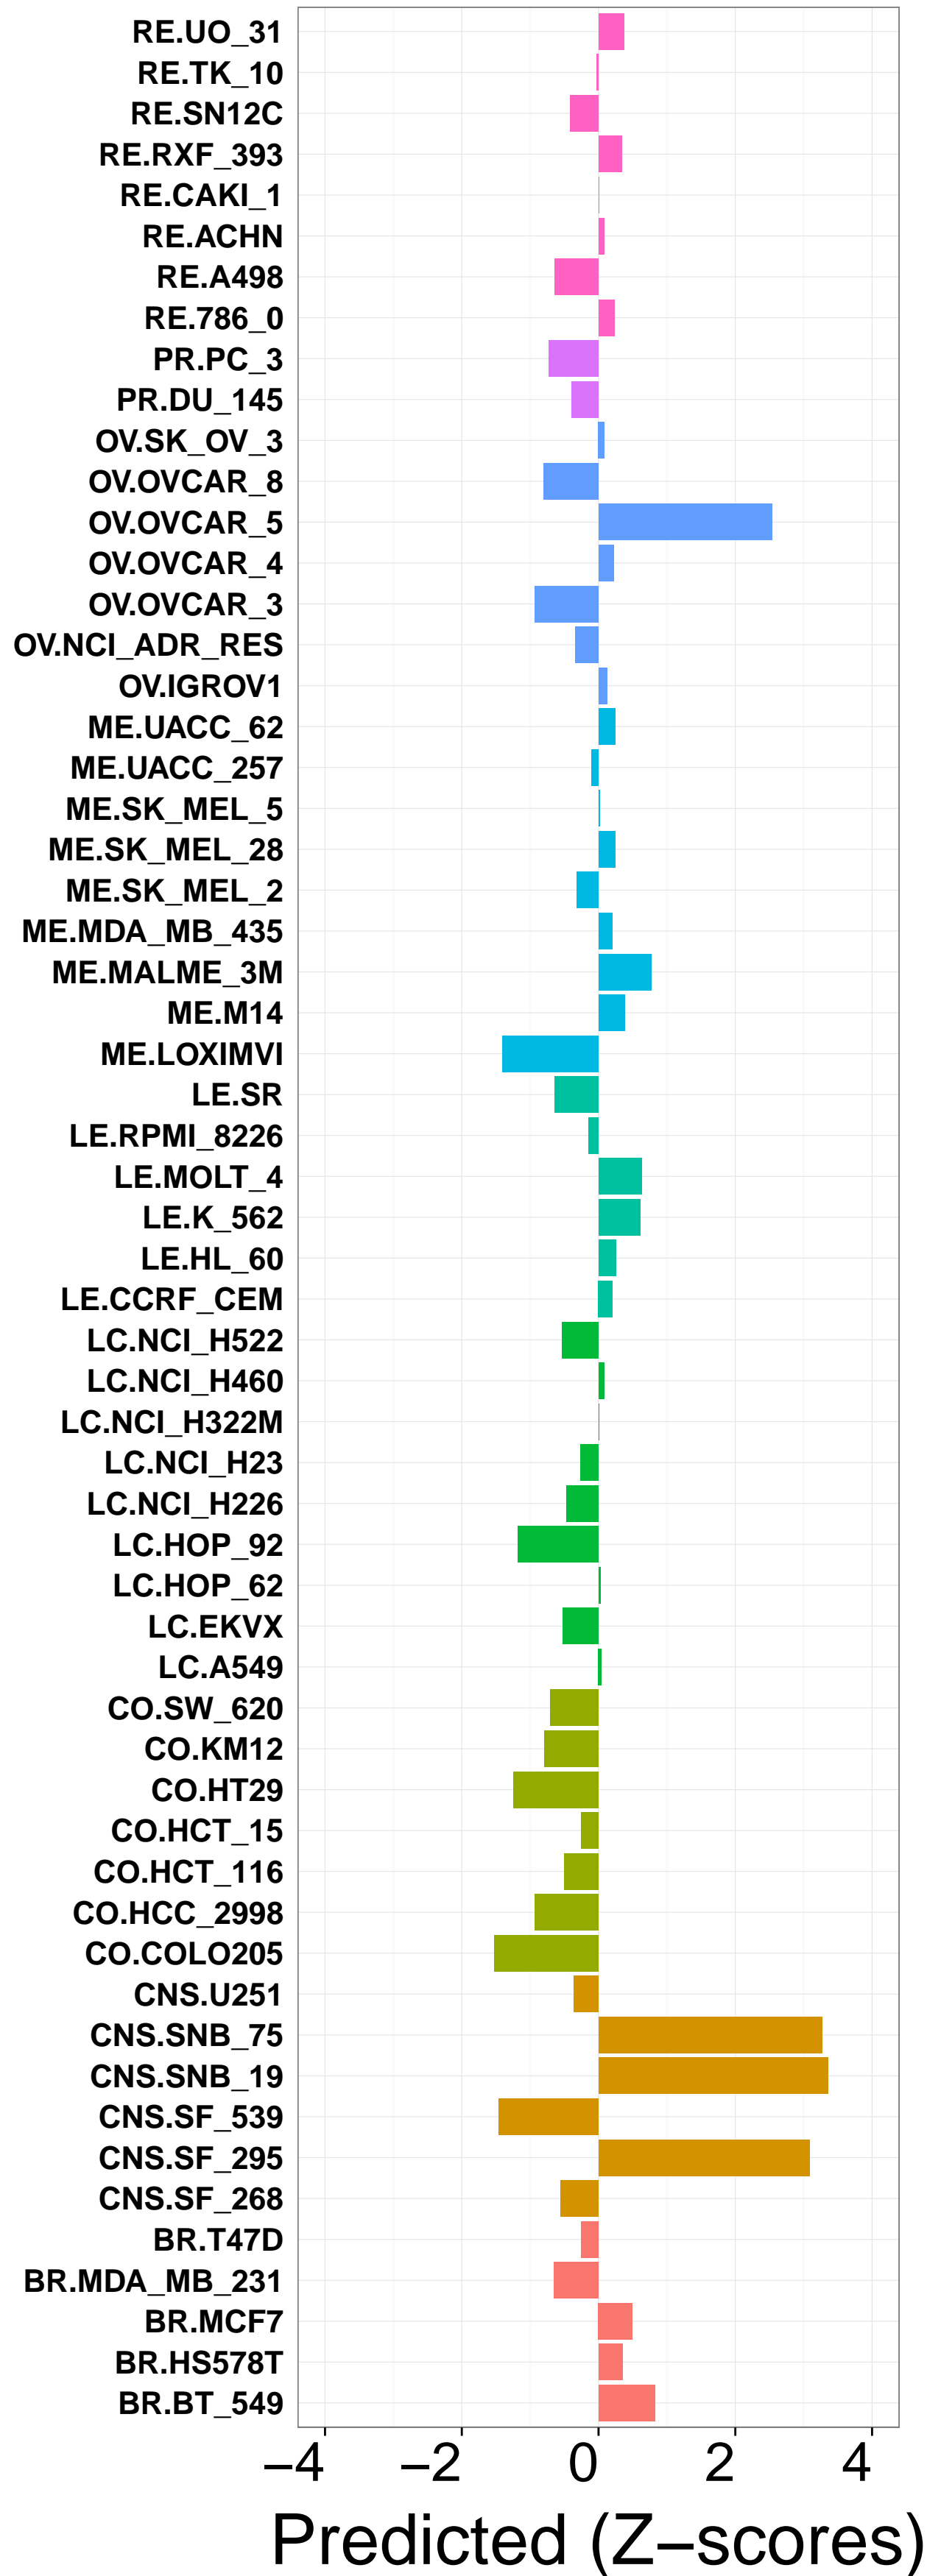

# NSC 174939, (LOTO)

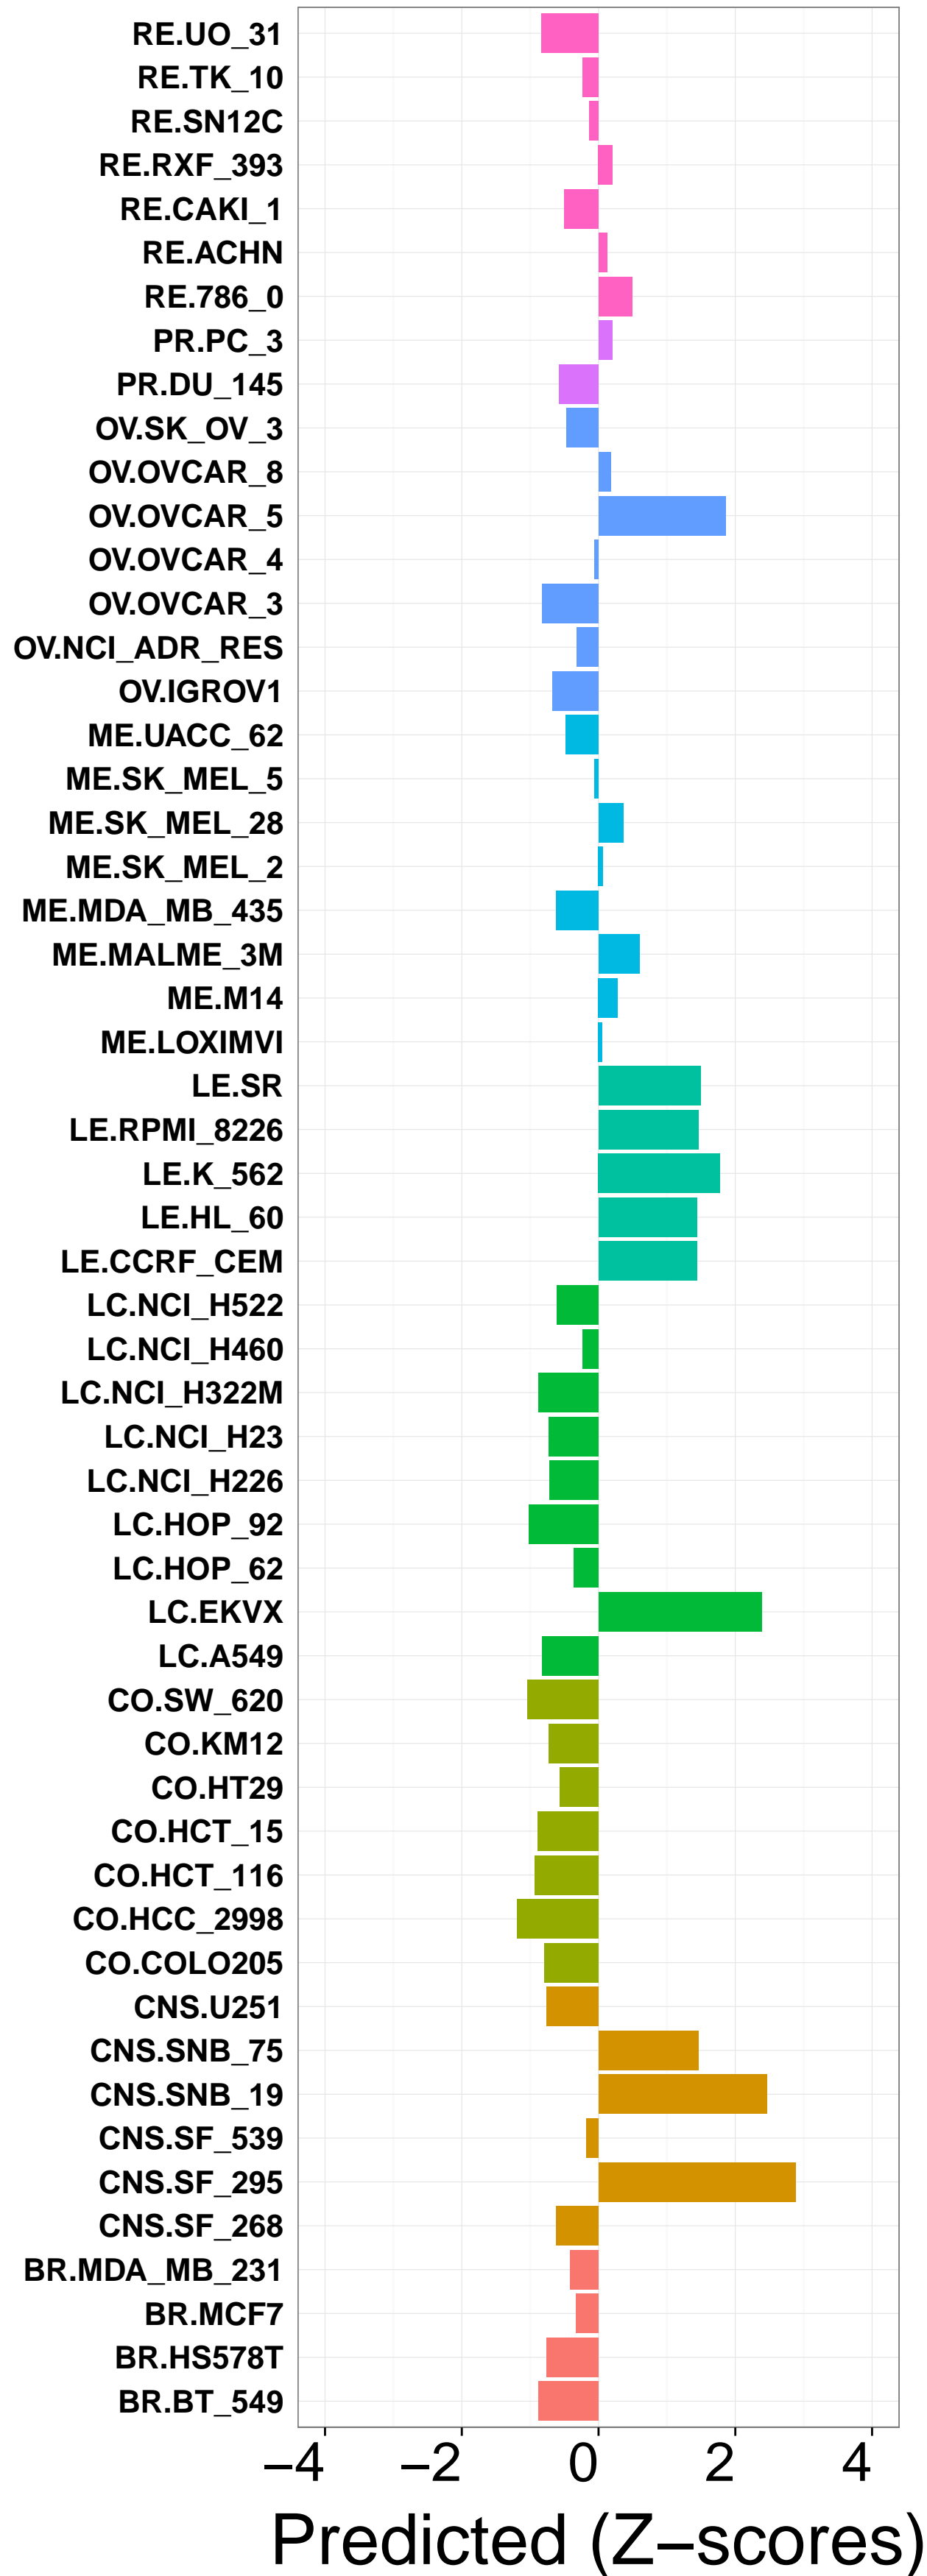

# NSC 19893, Fluorouracil (LOTO)

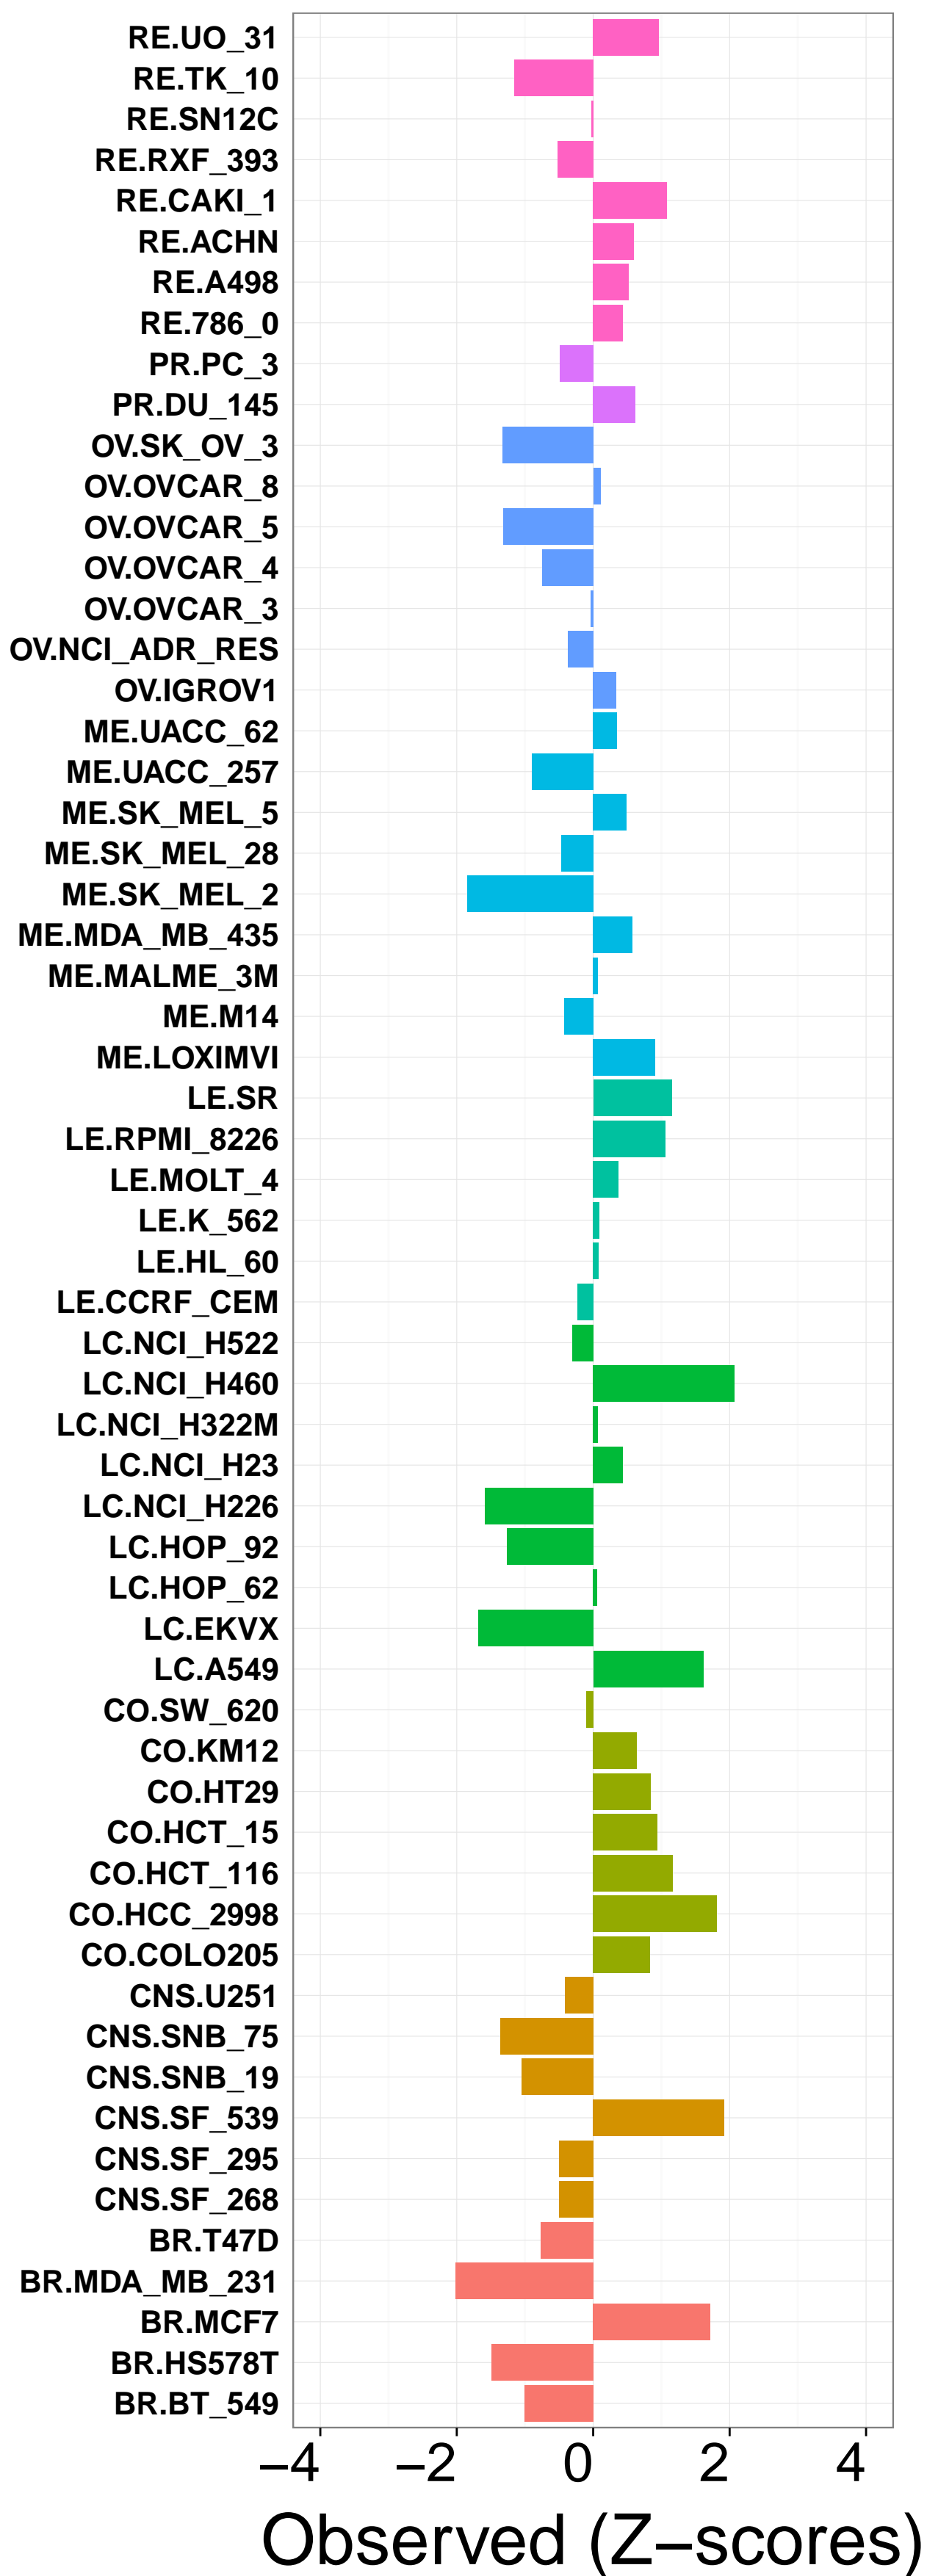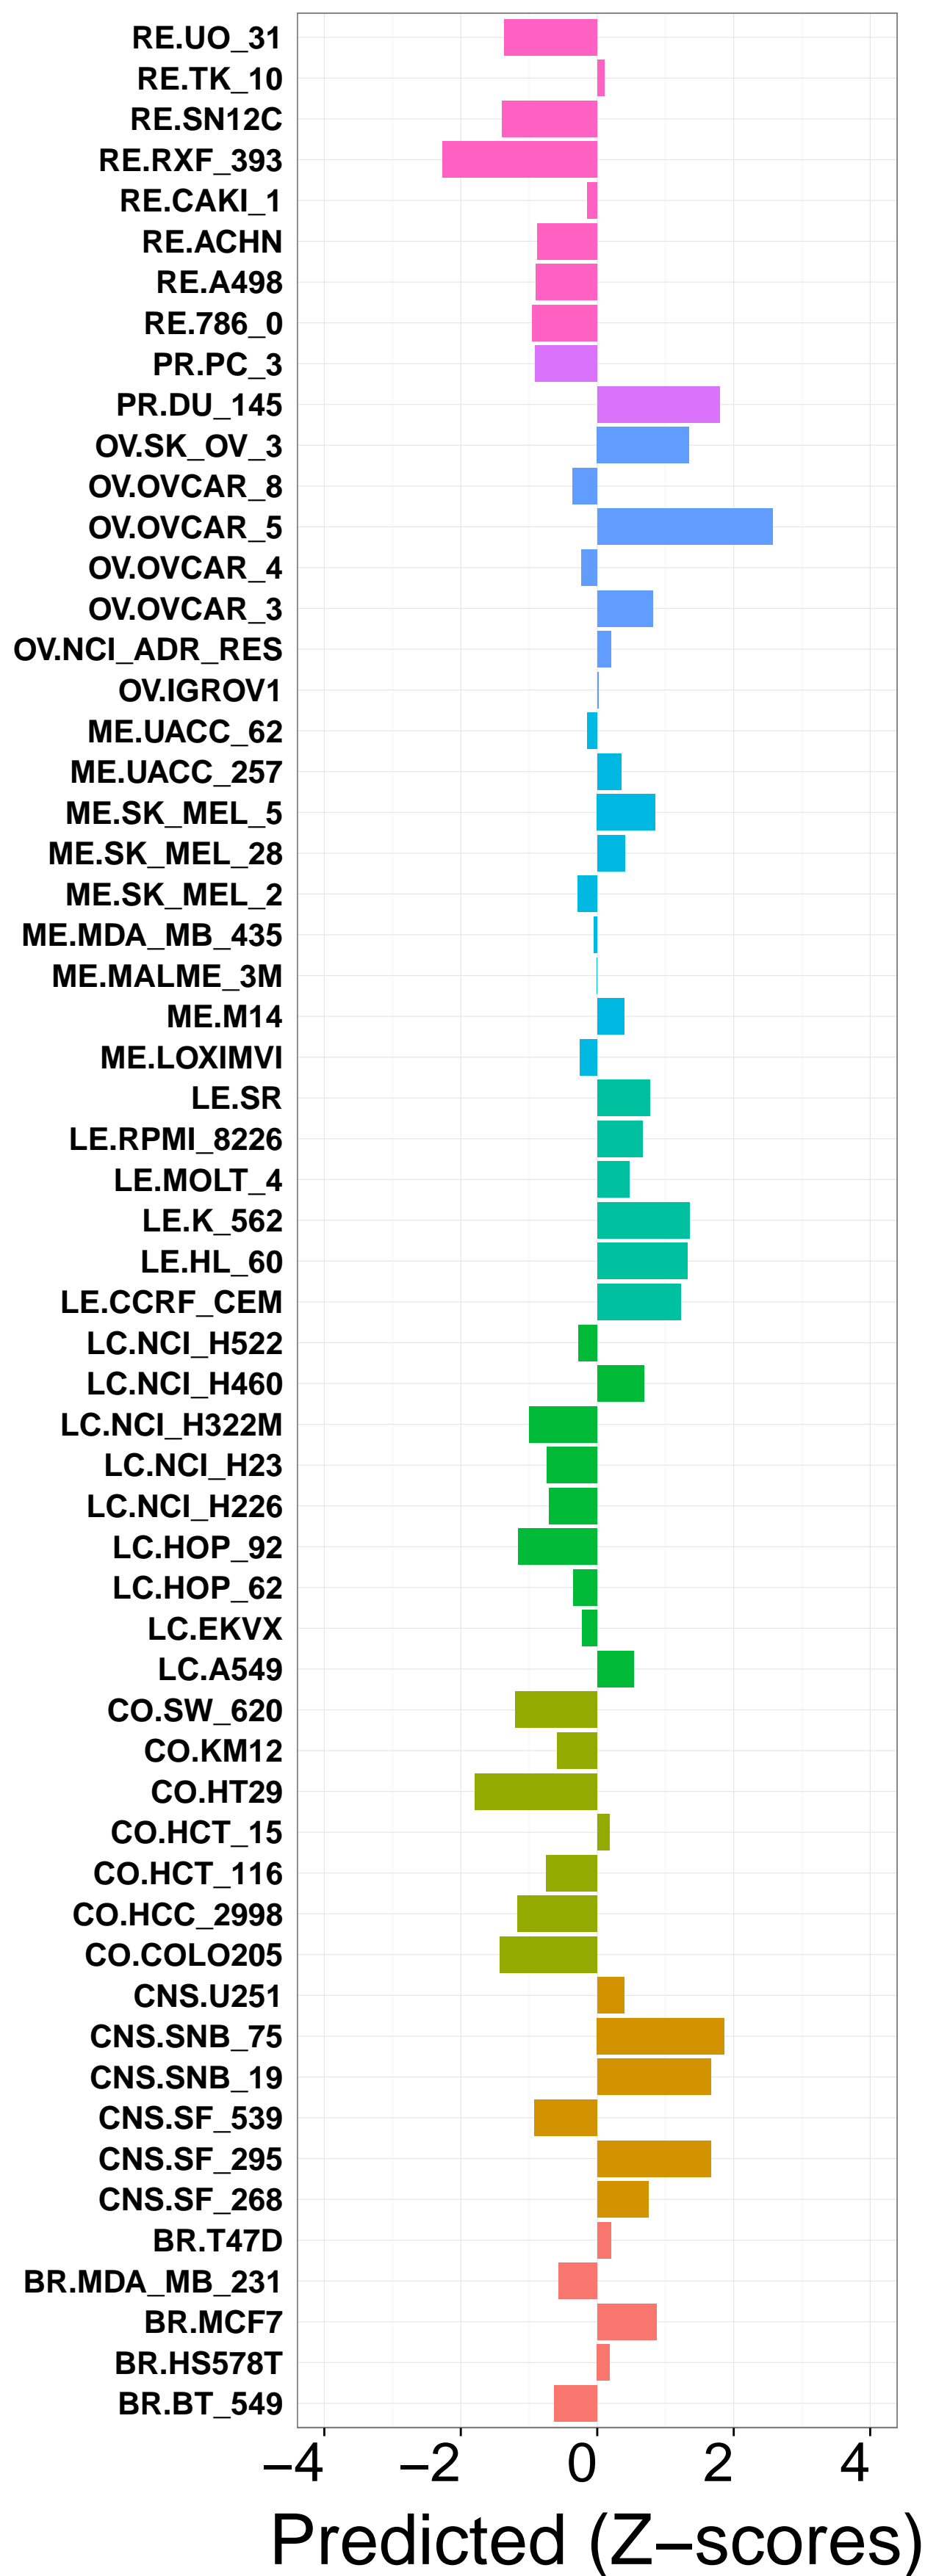



# NSC 221019, (LOTO)

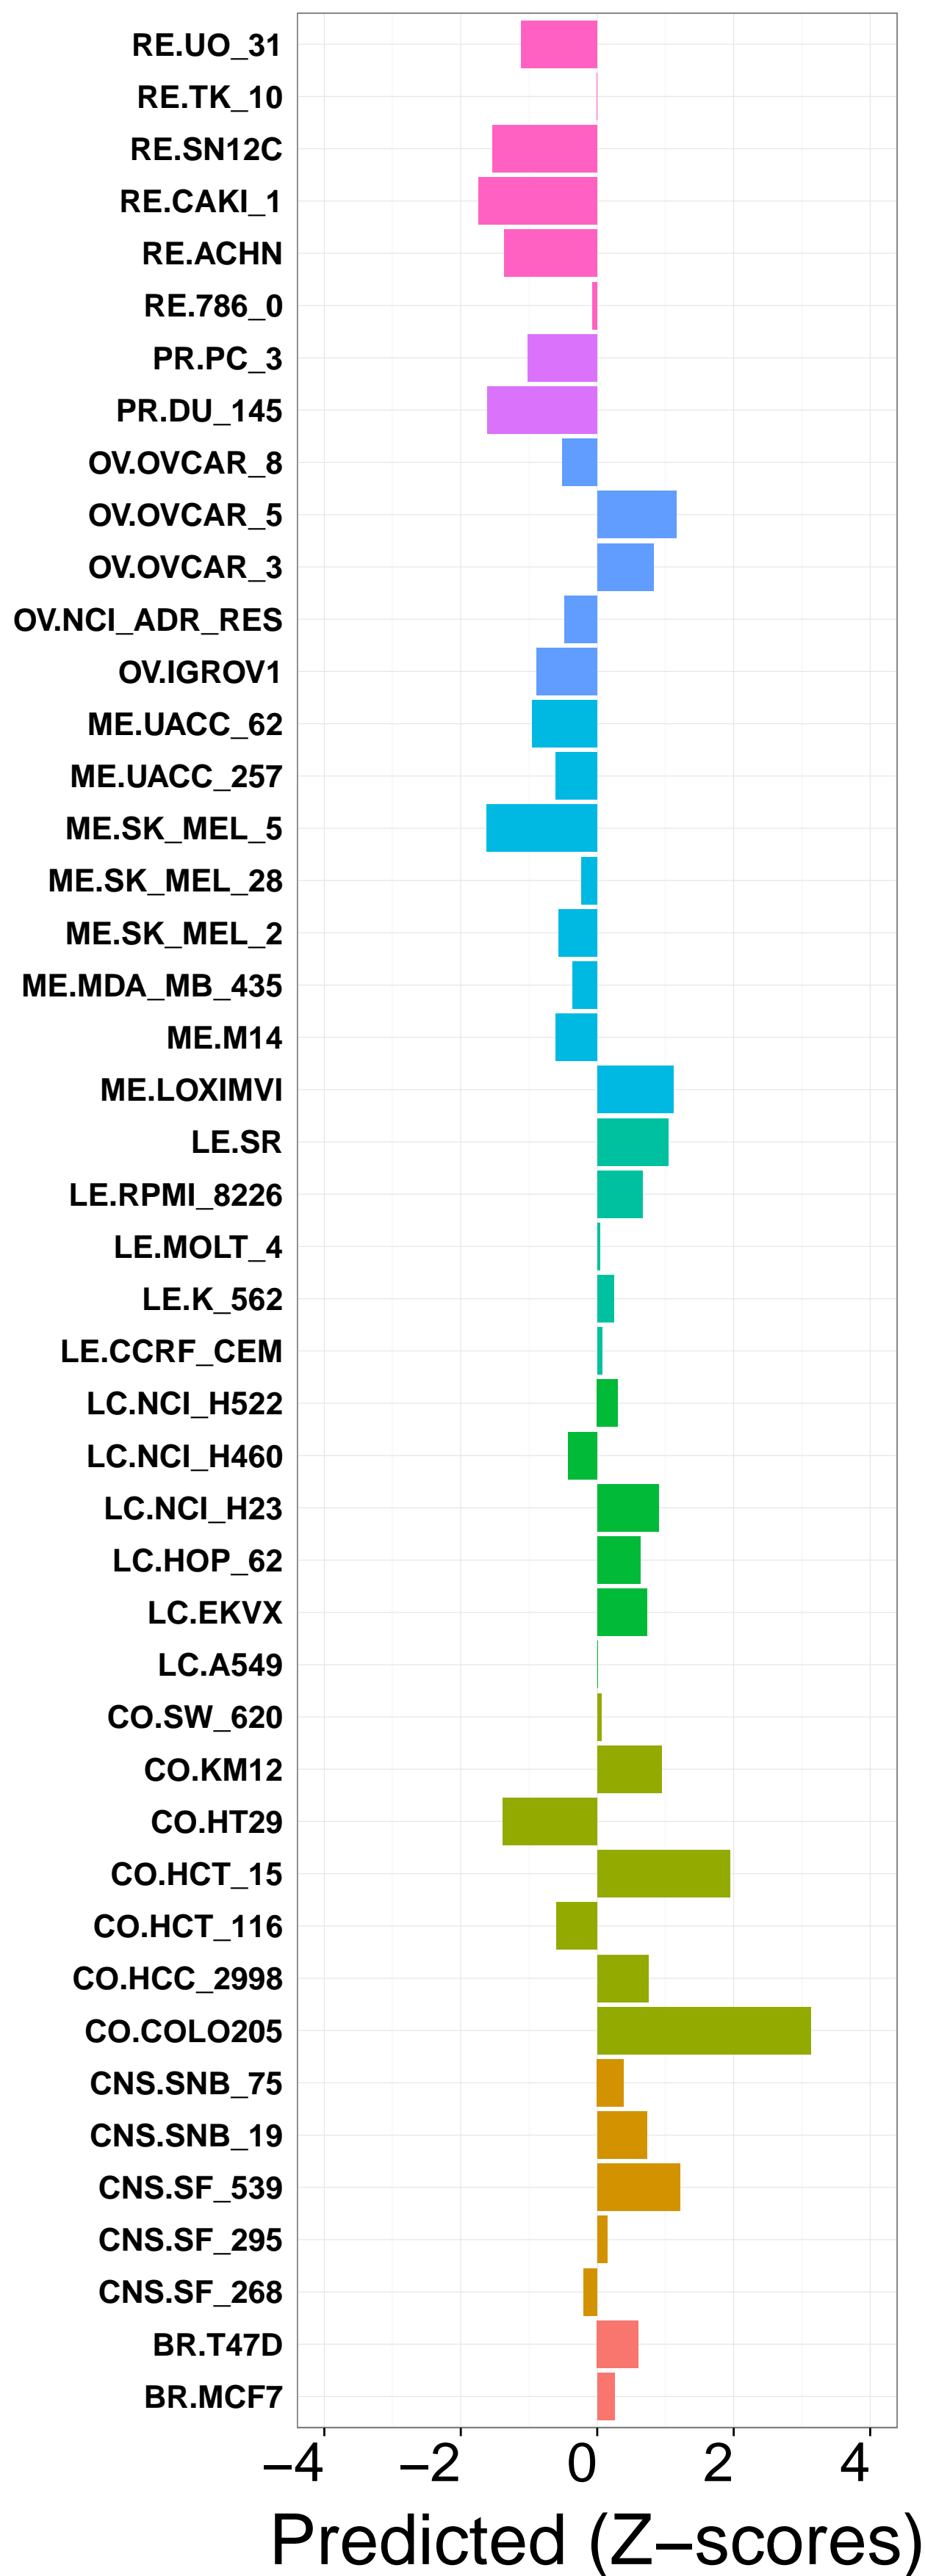

# NSC 246131, (LOTO)

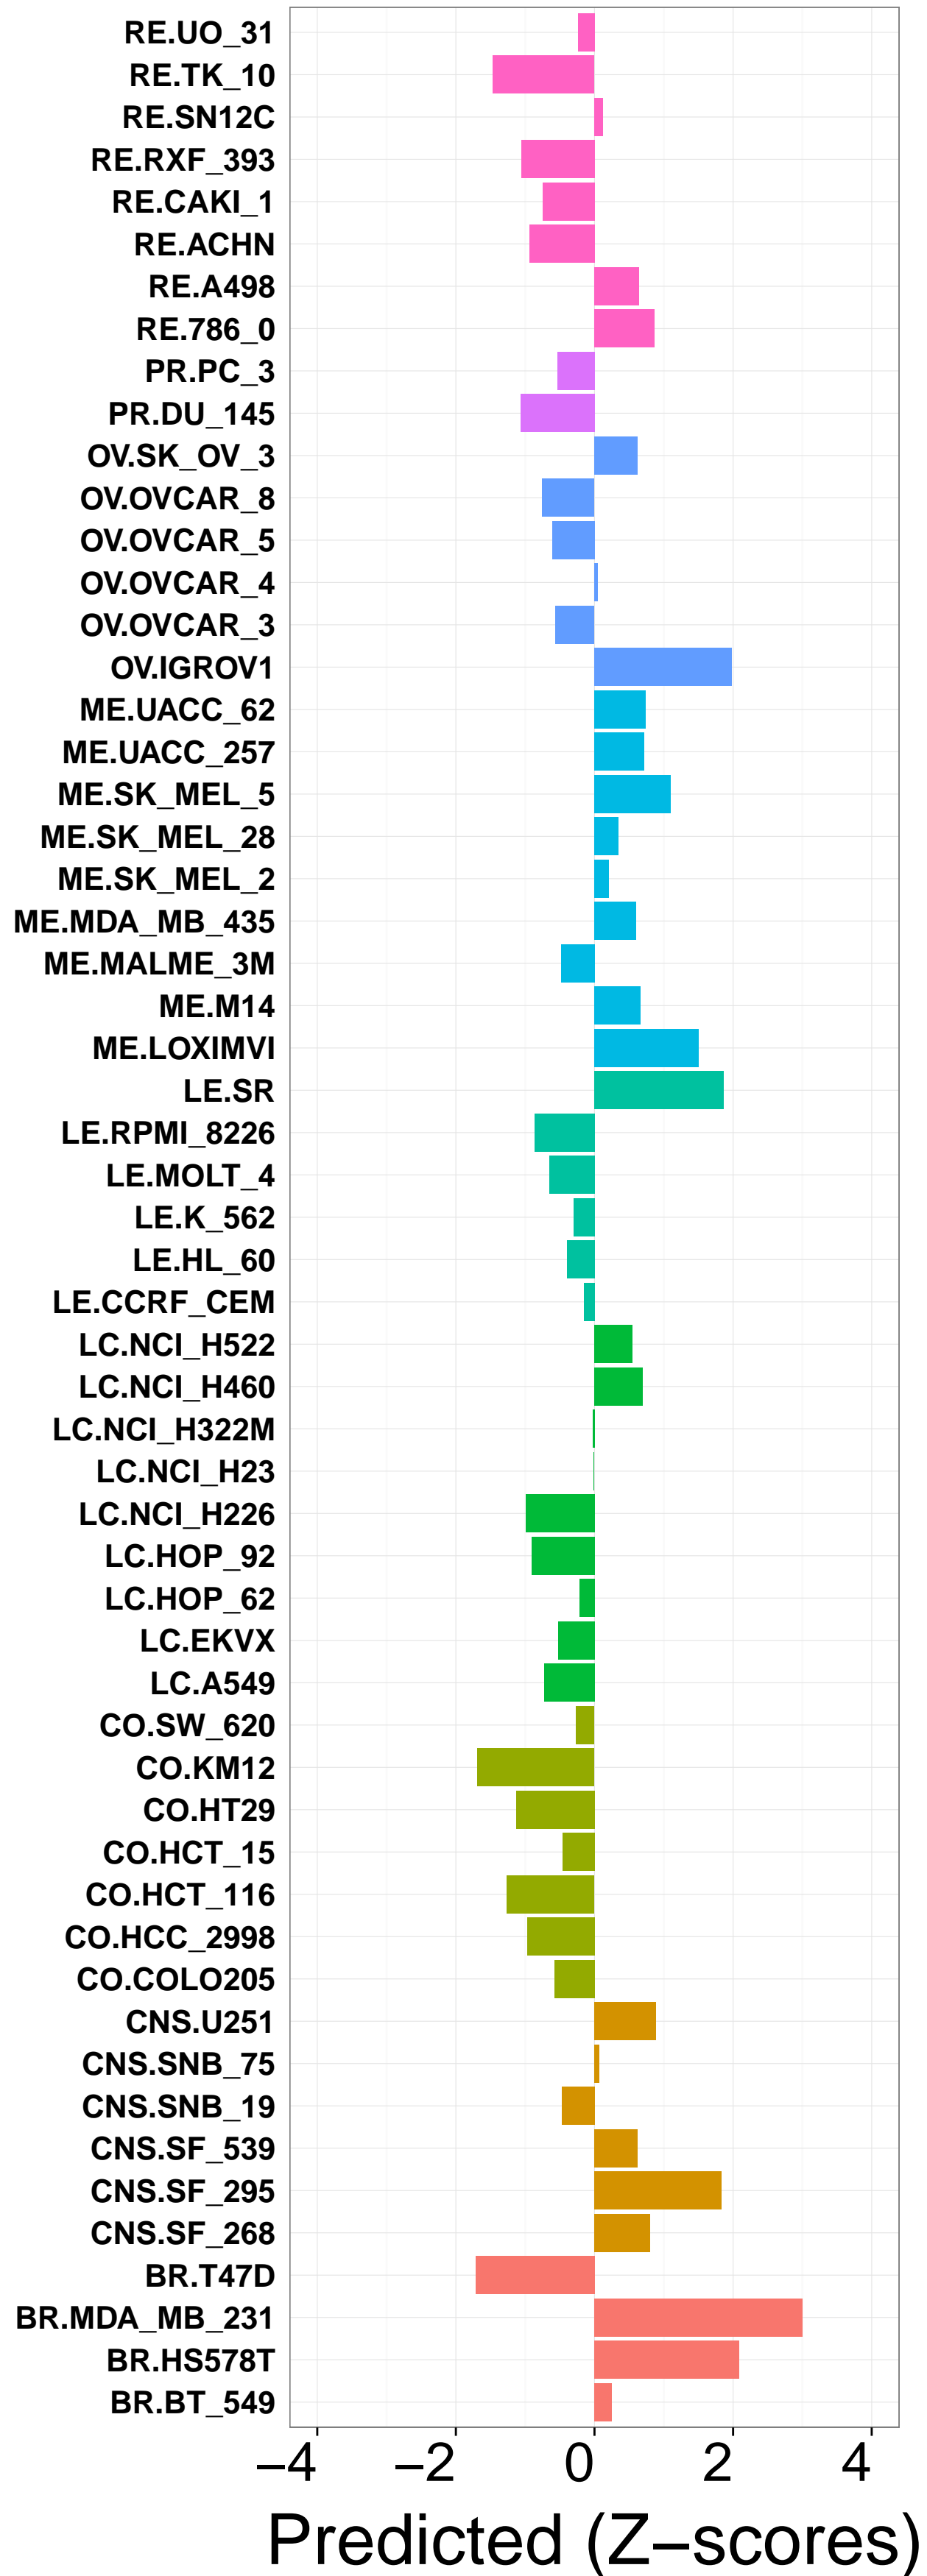

# NSC 255109, (LOTO)

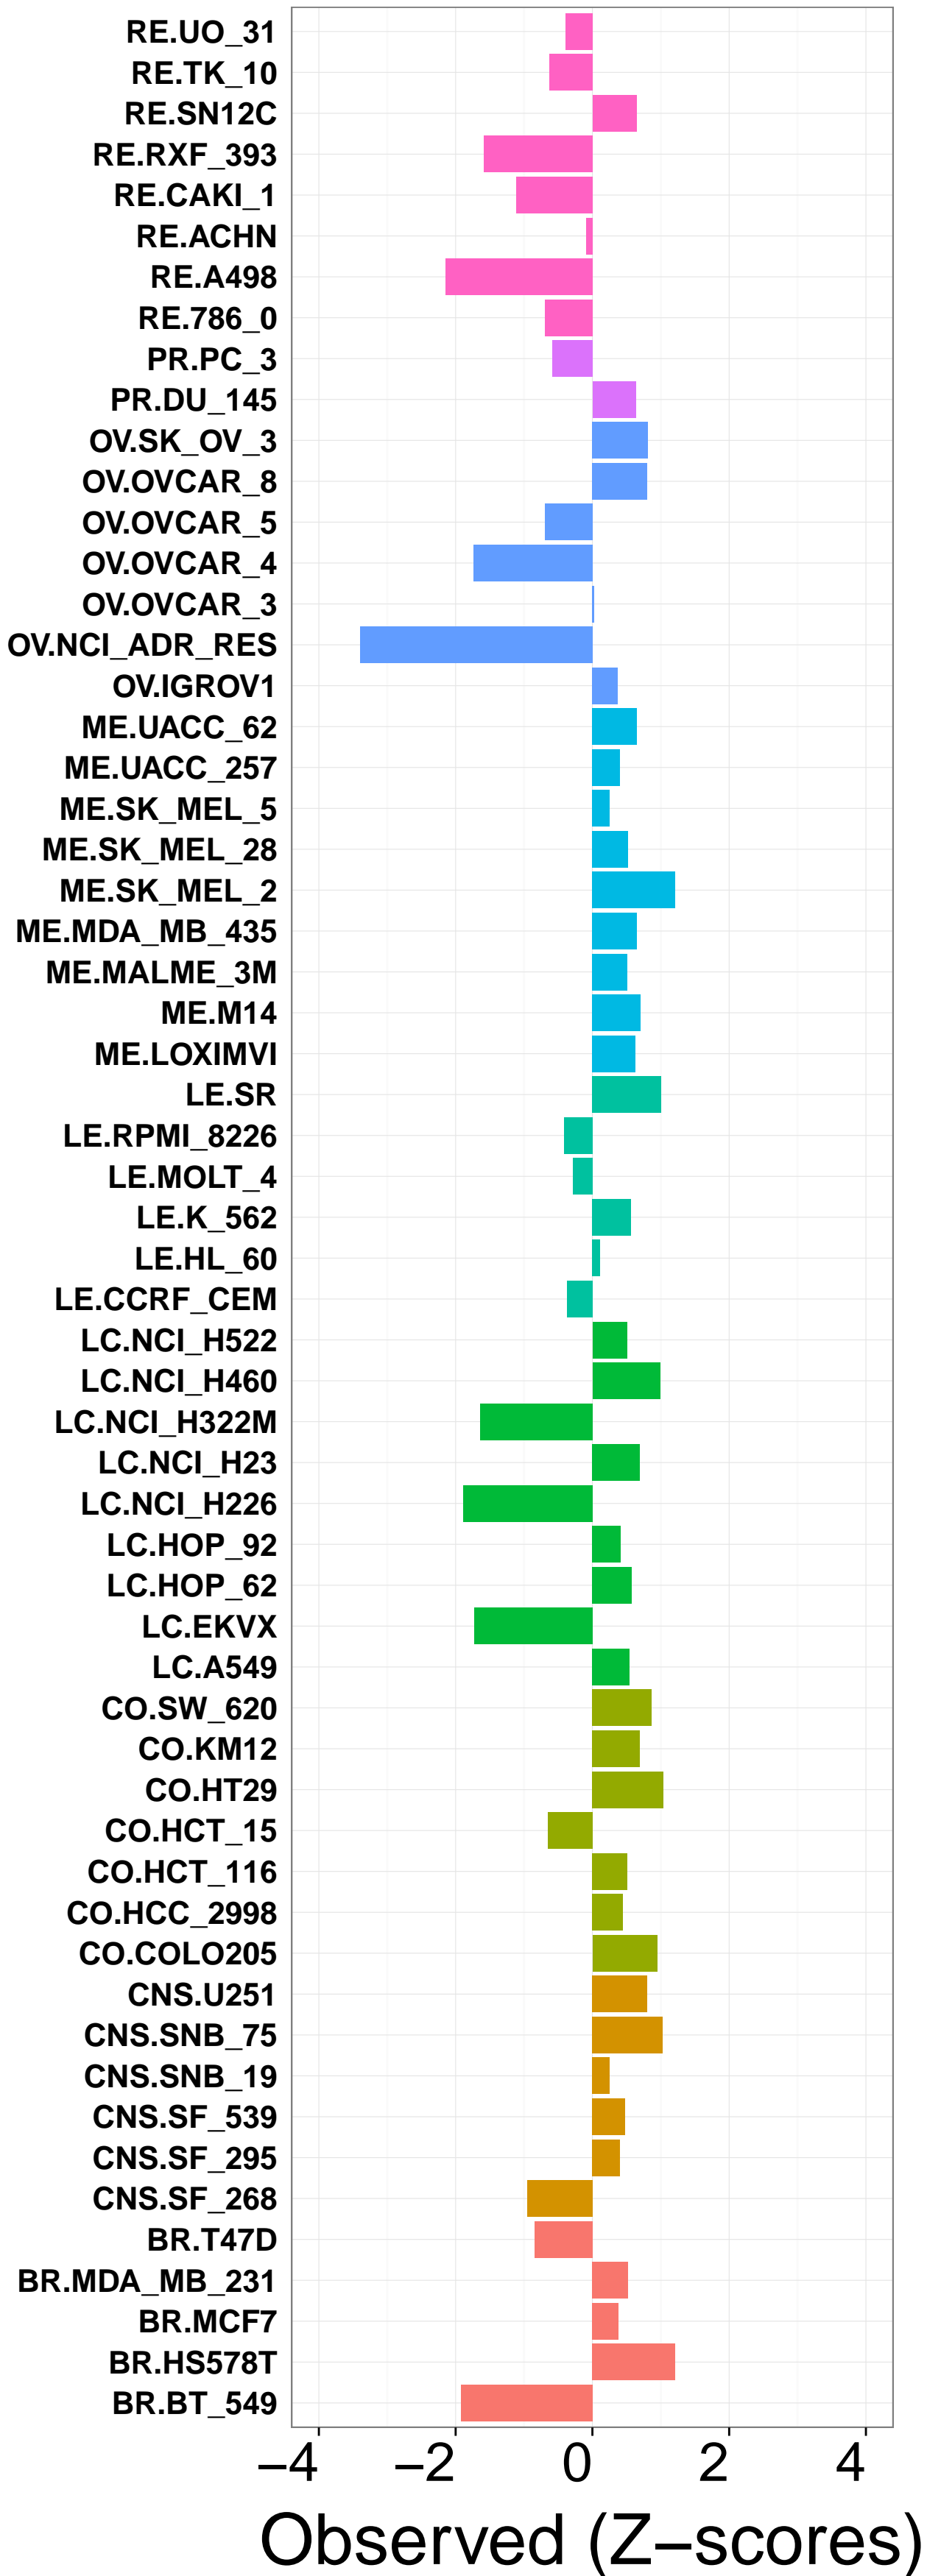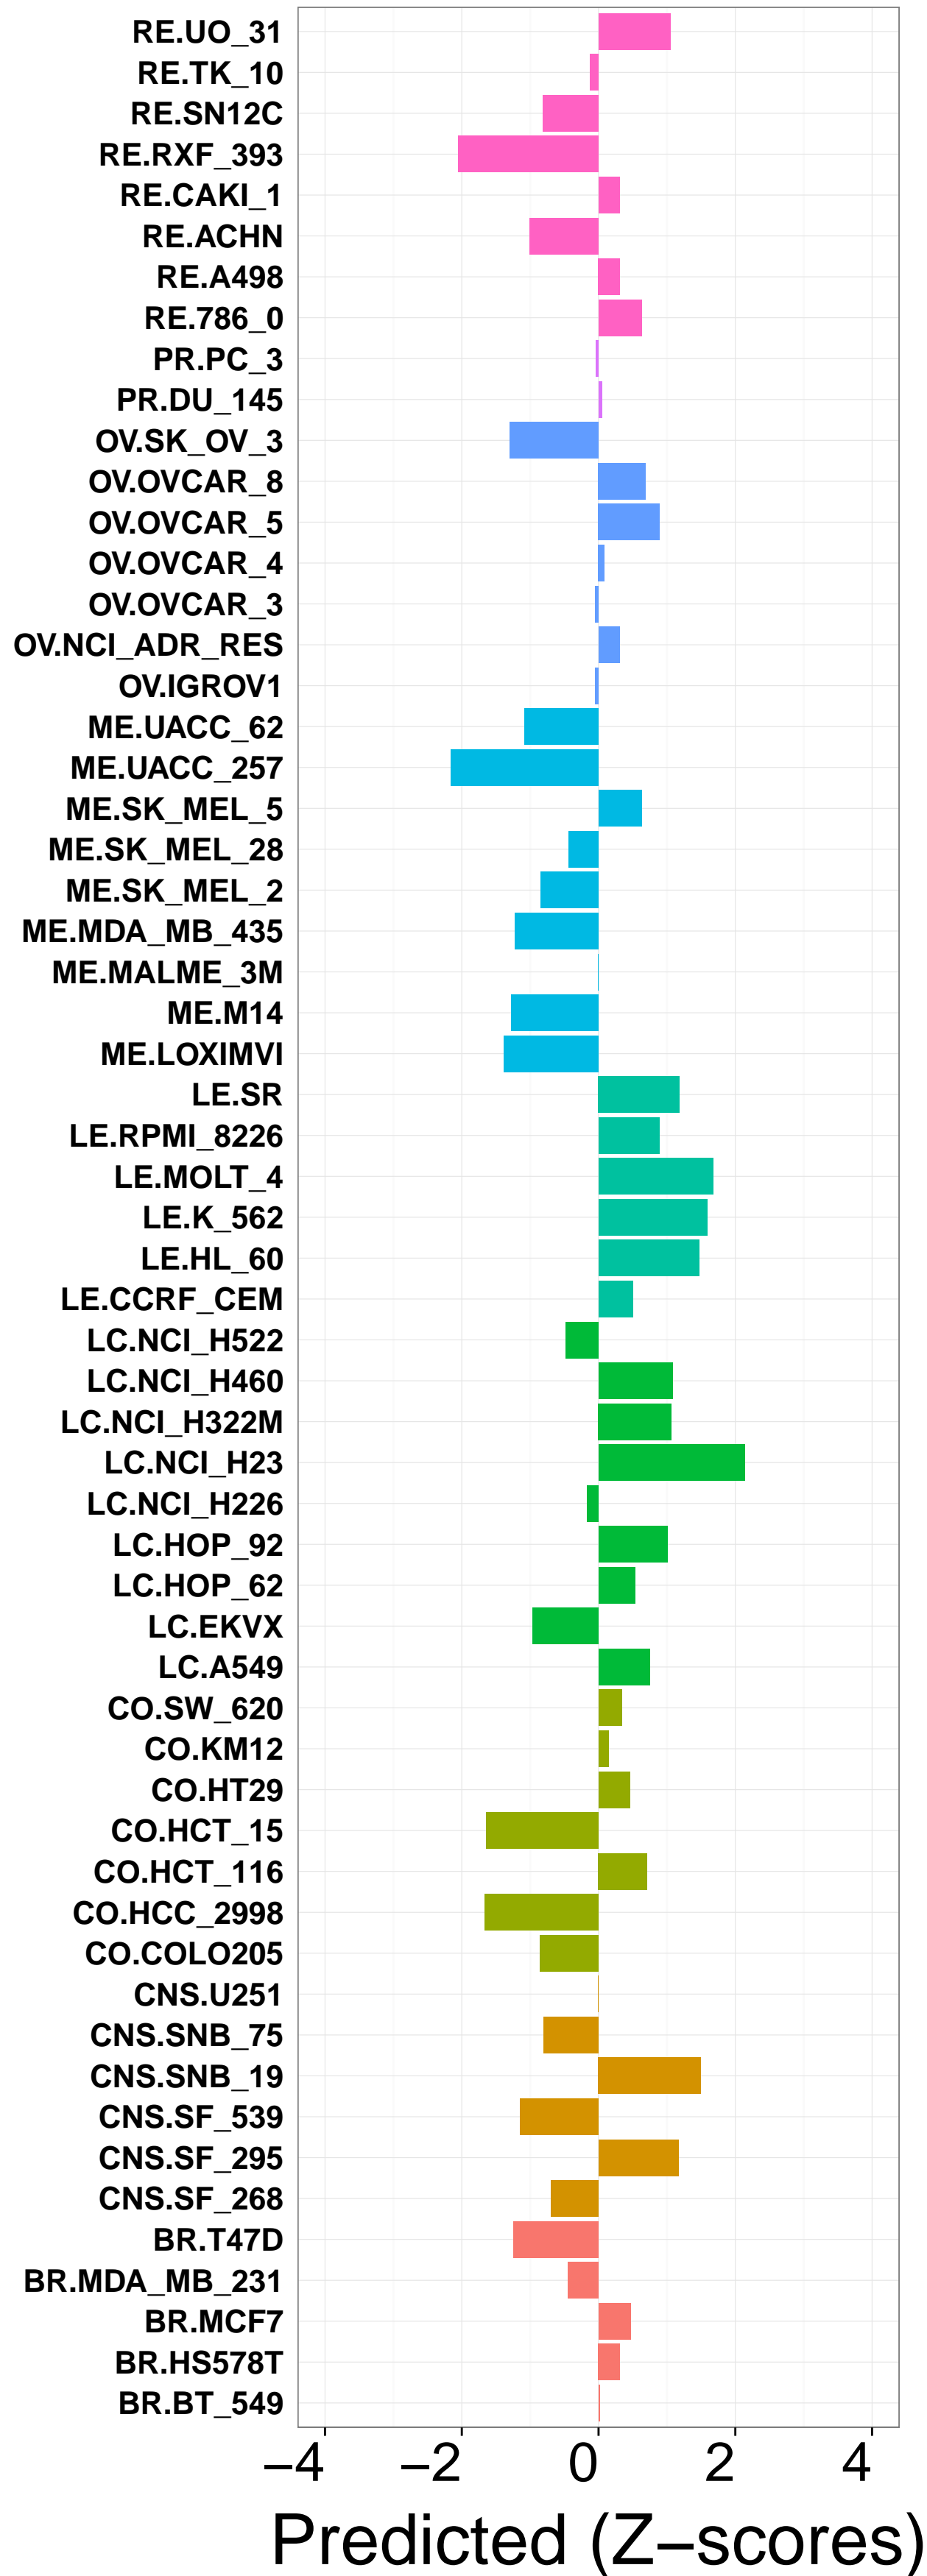

# NSC 256942, (LOTO)

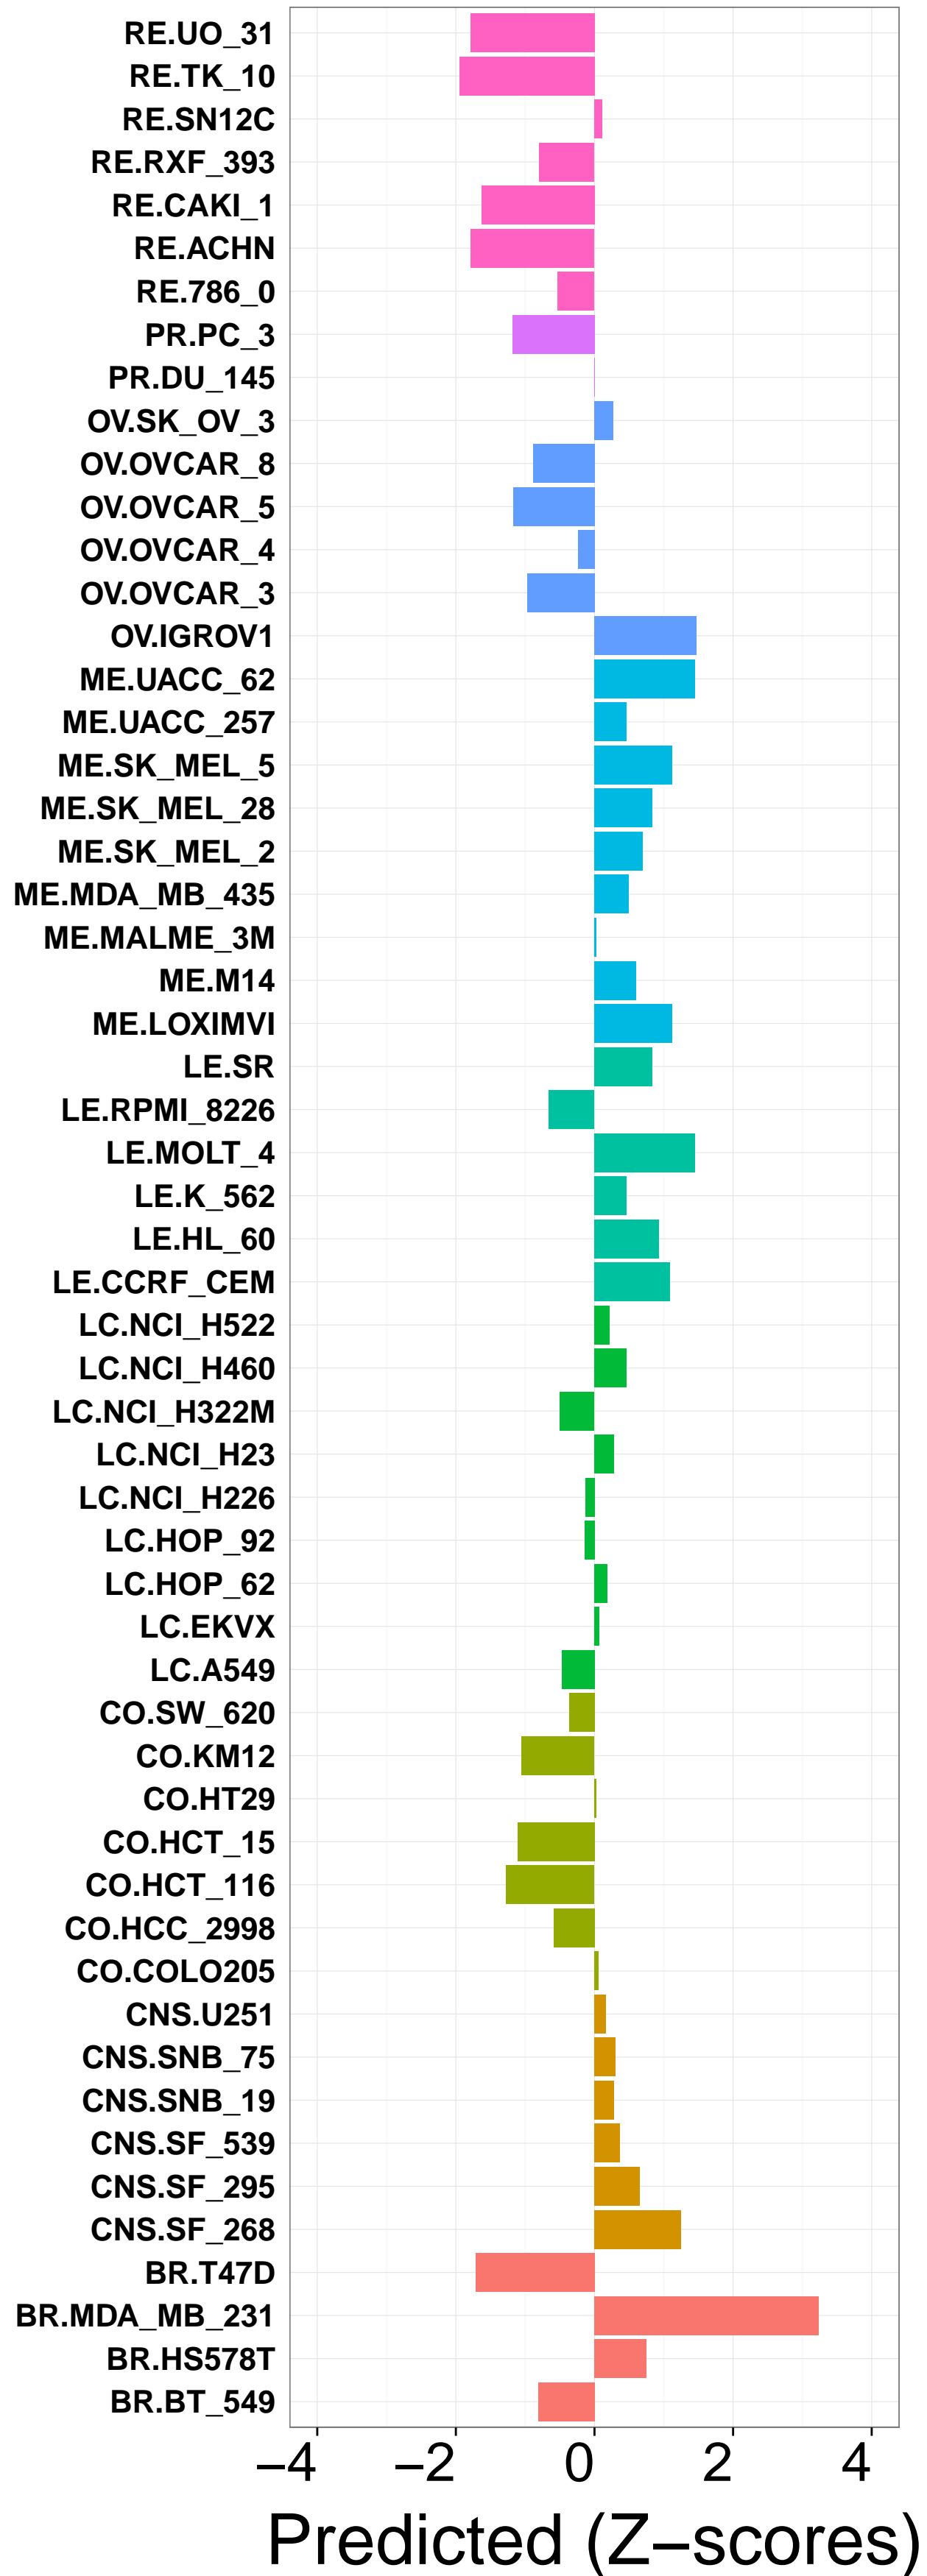

# NSC 26980, Mitomycin (LOTO)

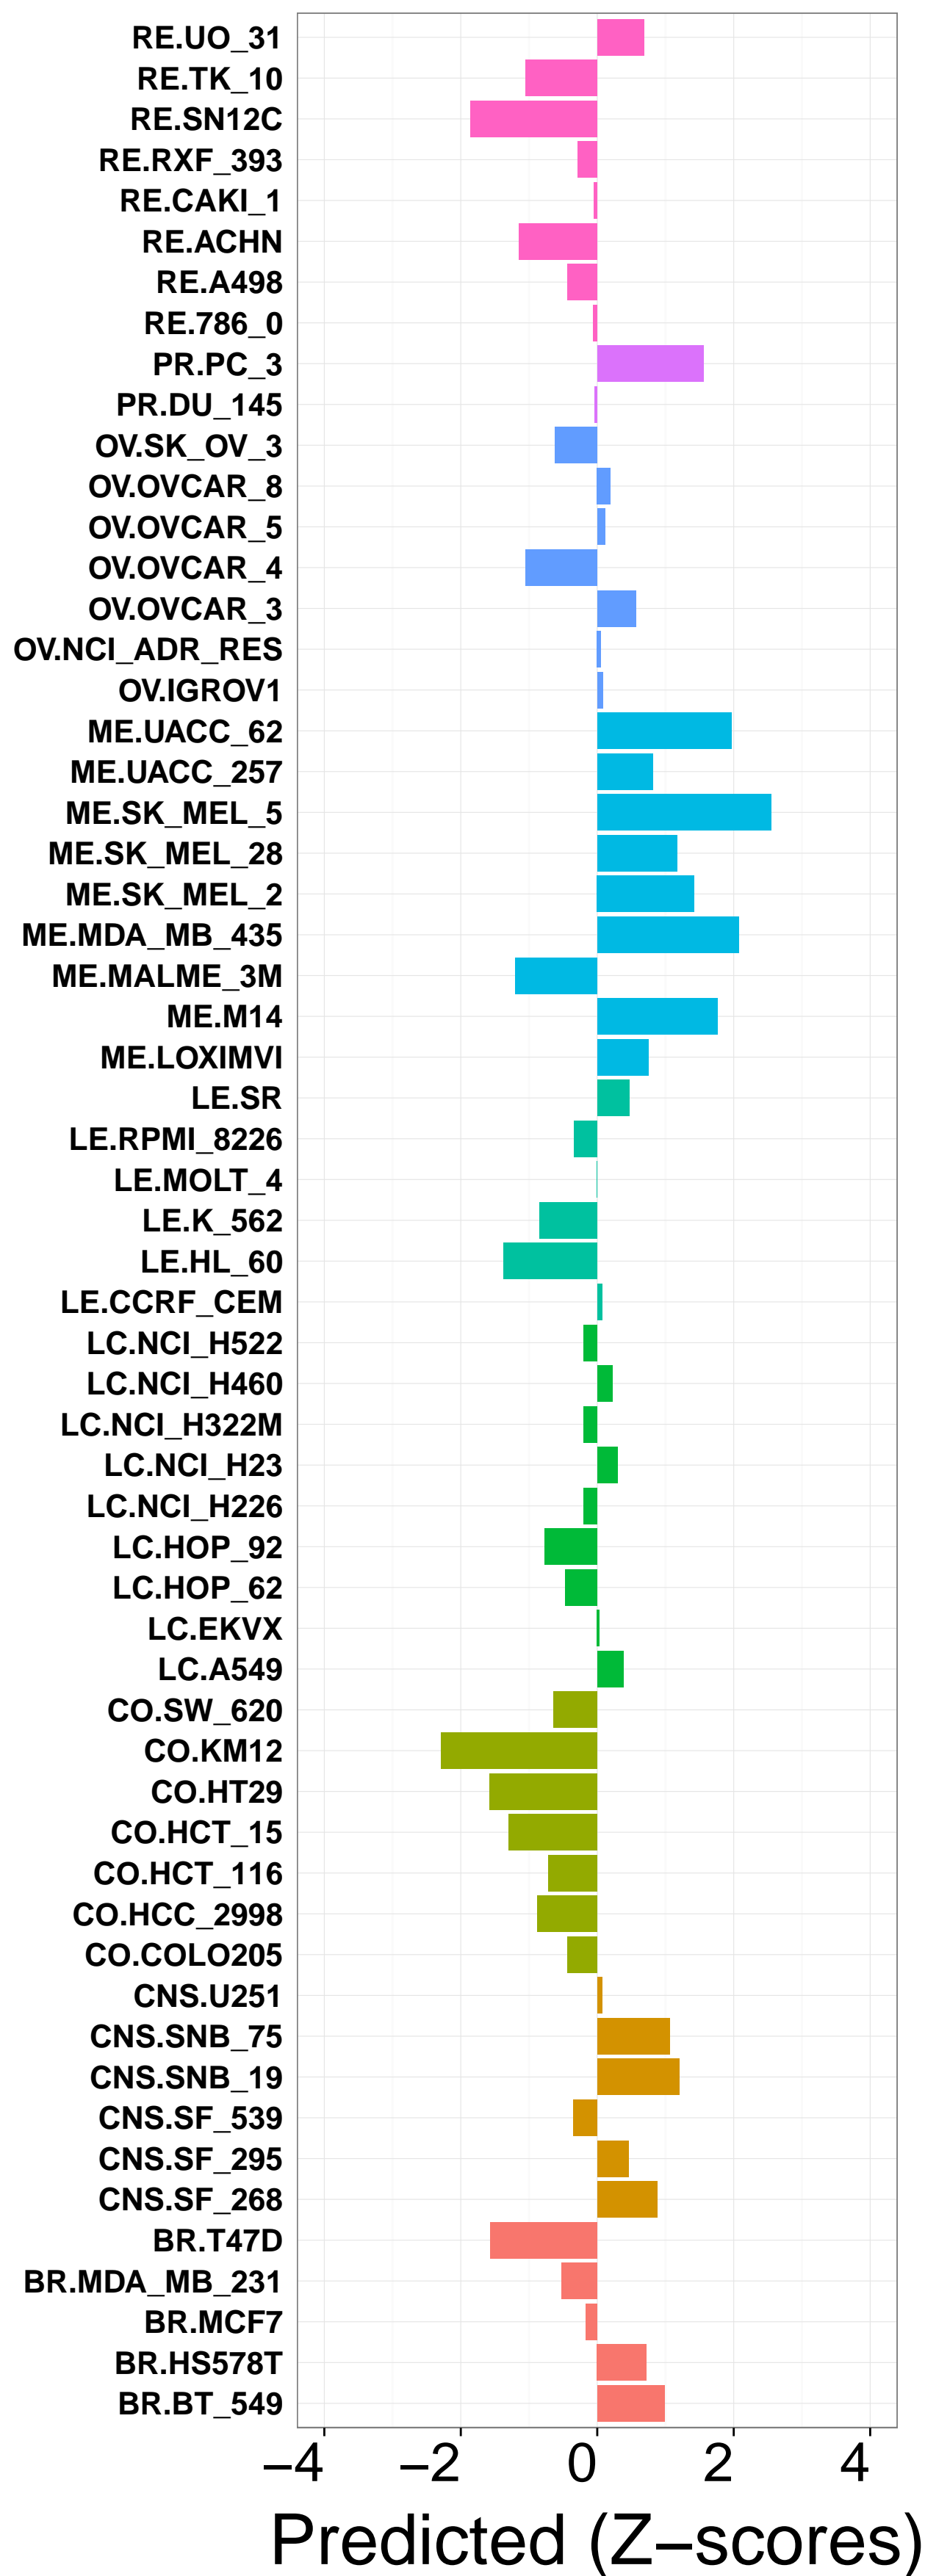



# NSC 27640, Floxuridine (LOTO)

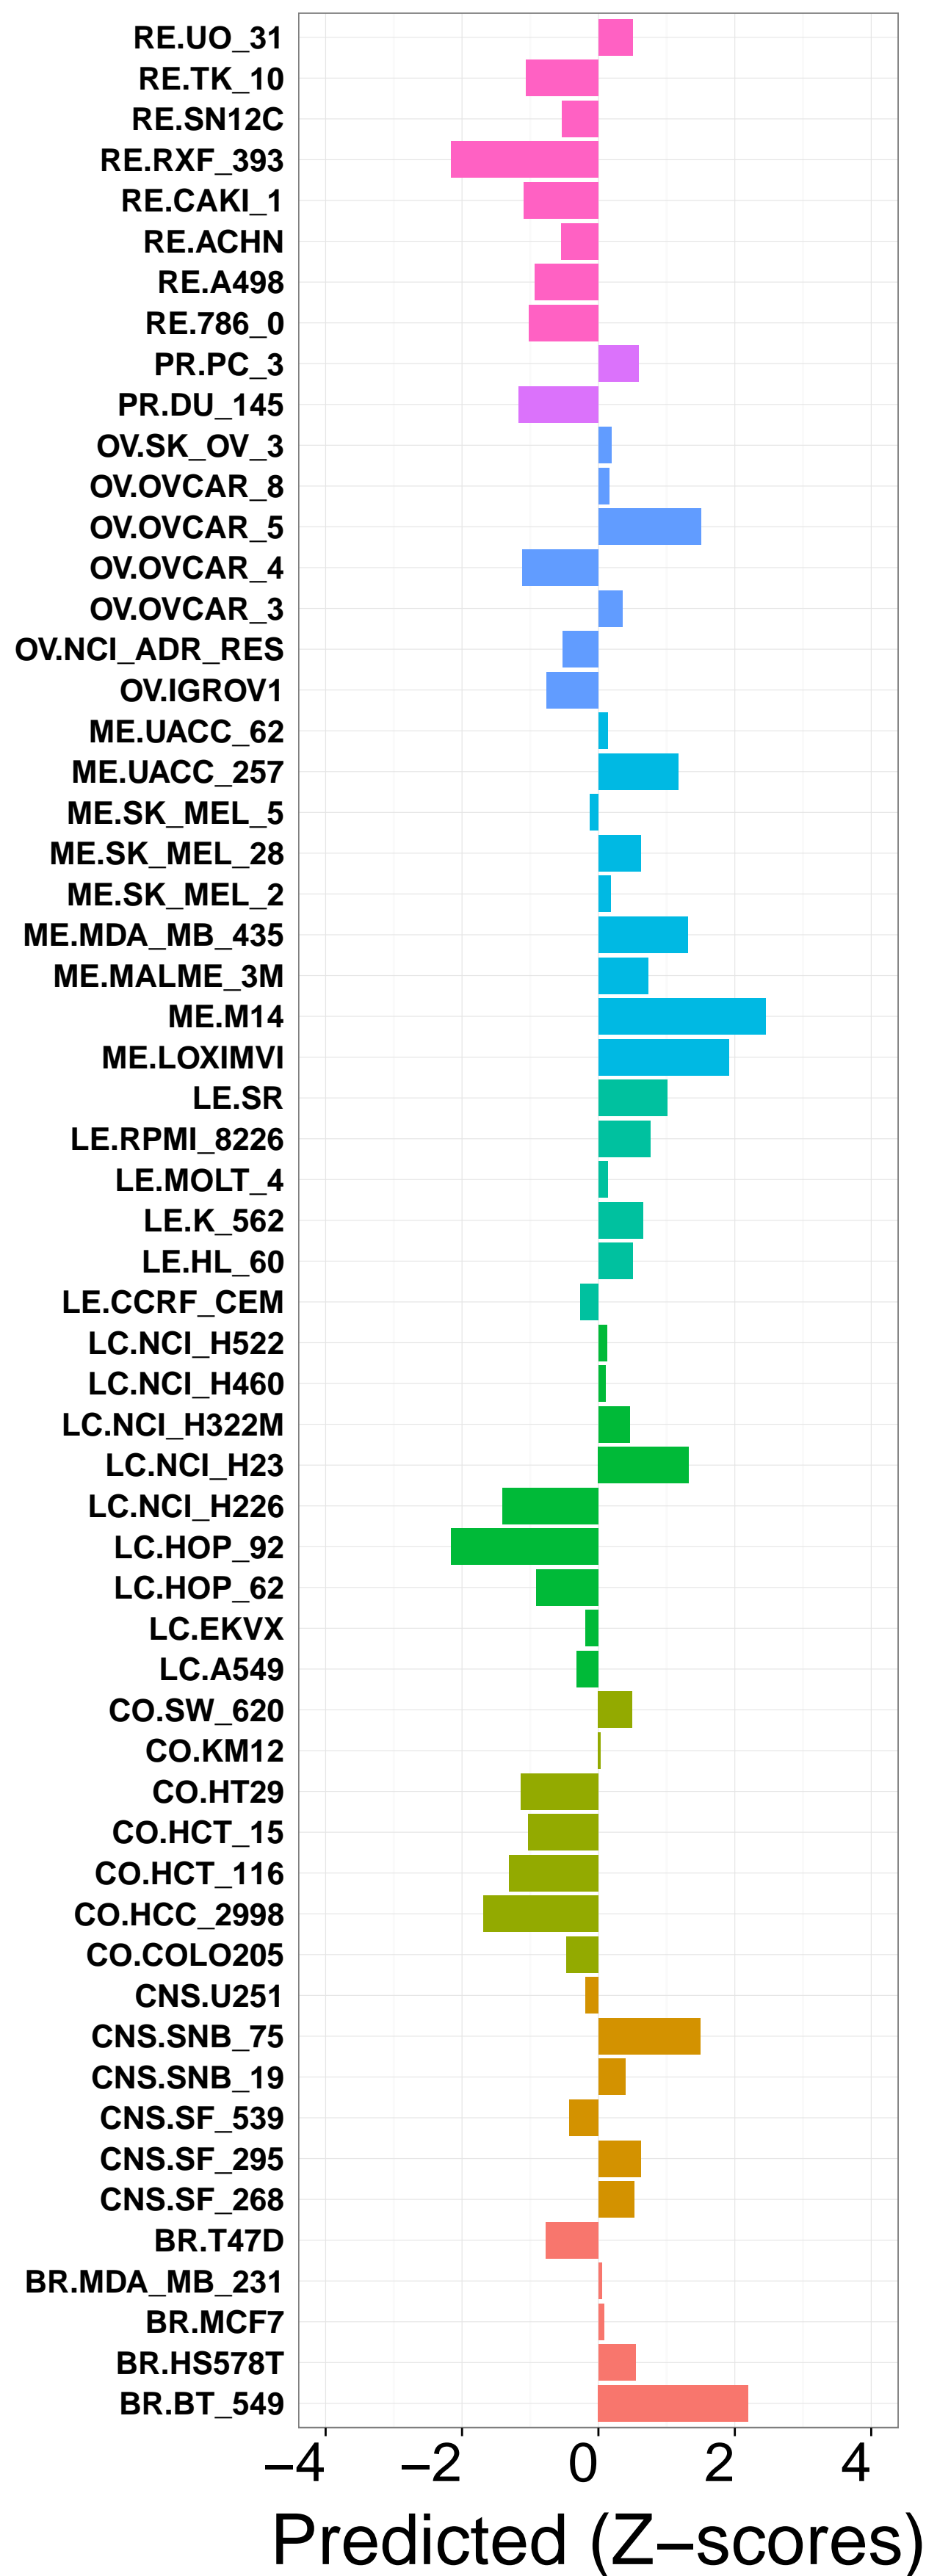

# NSC 279836, (LOTO)

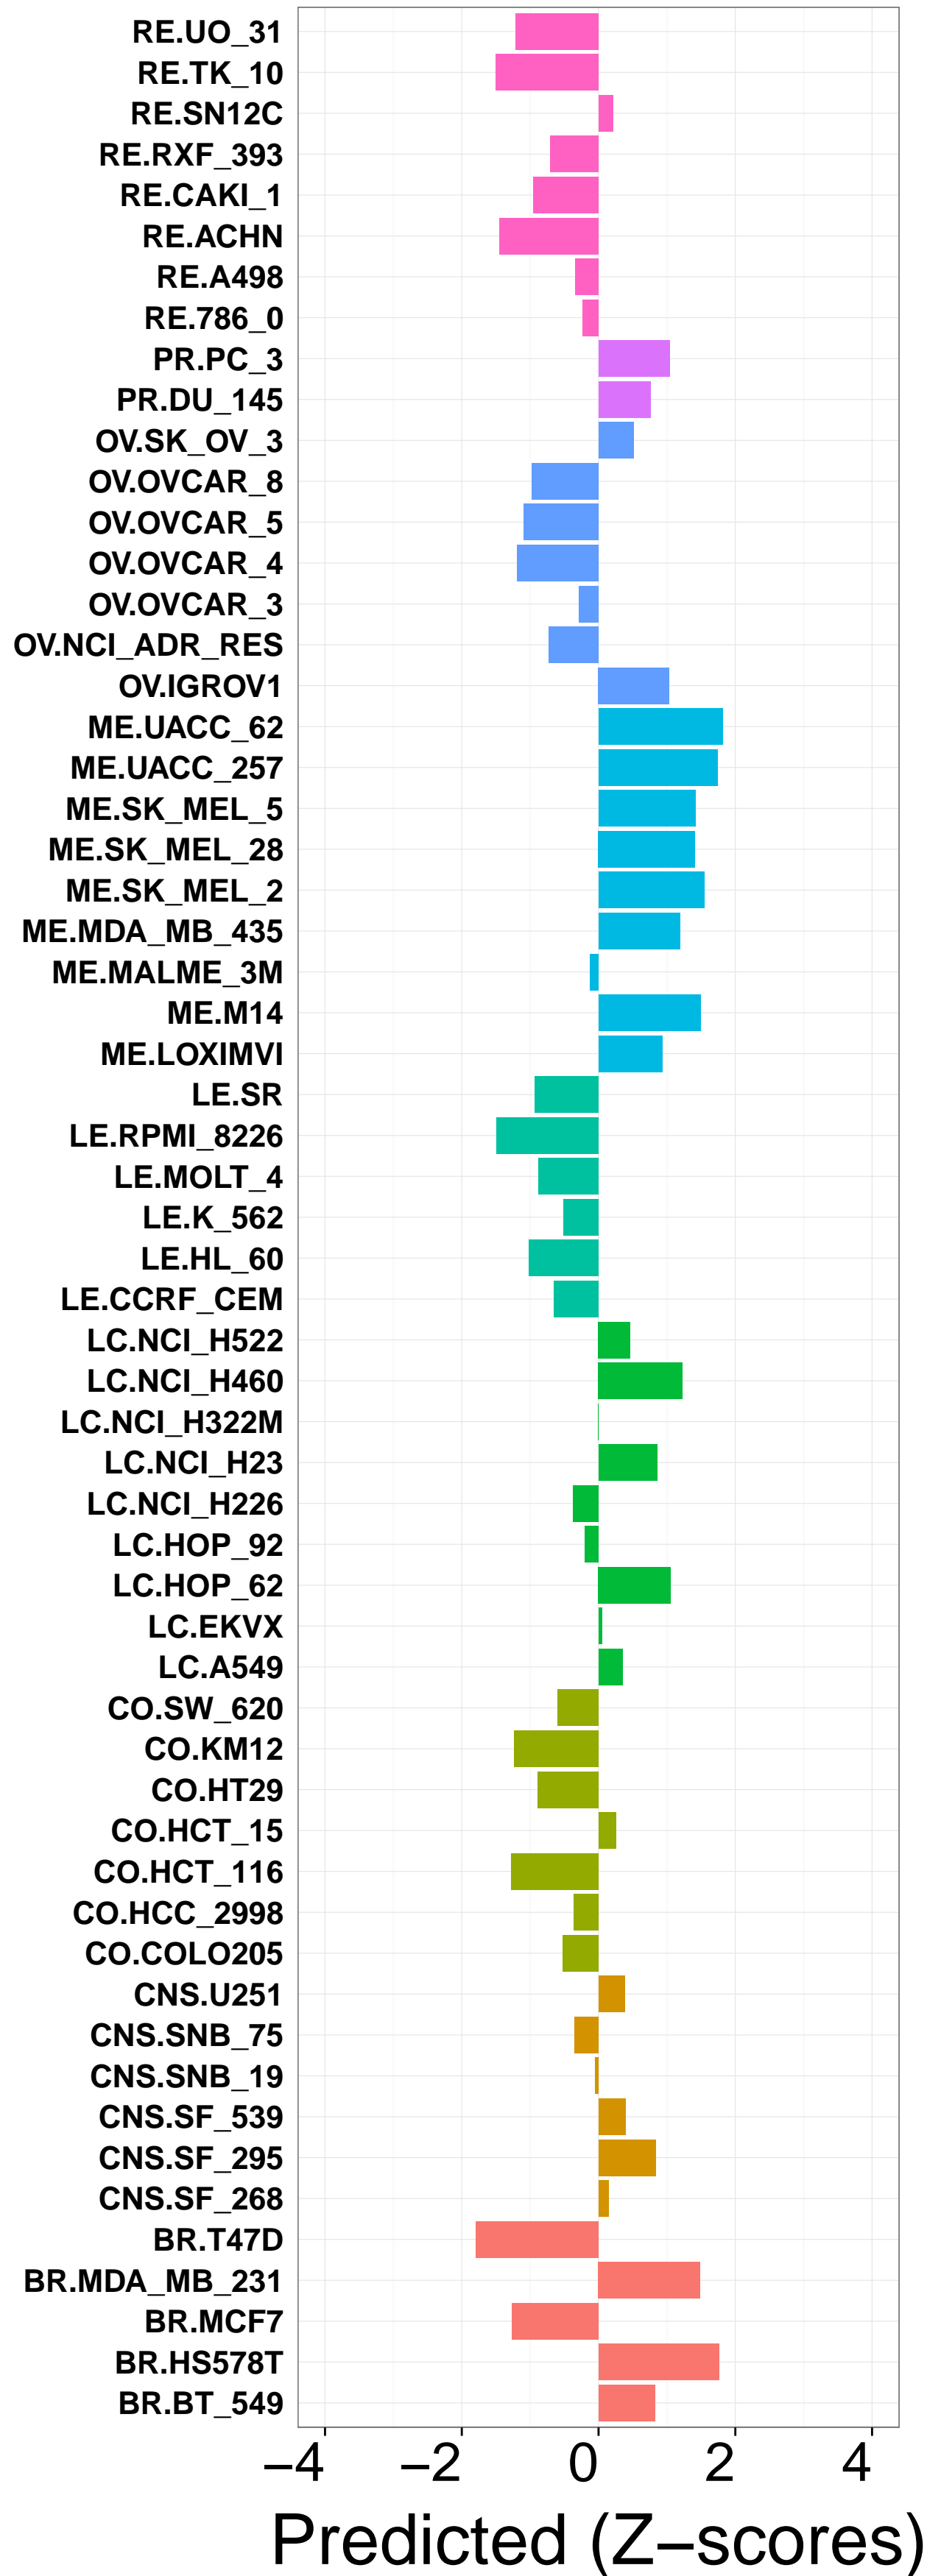

# NSC 280594, (LOTO)

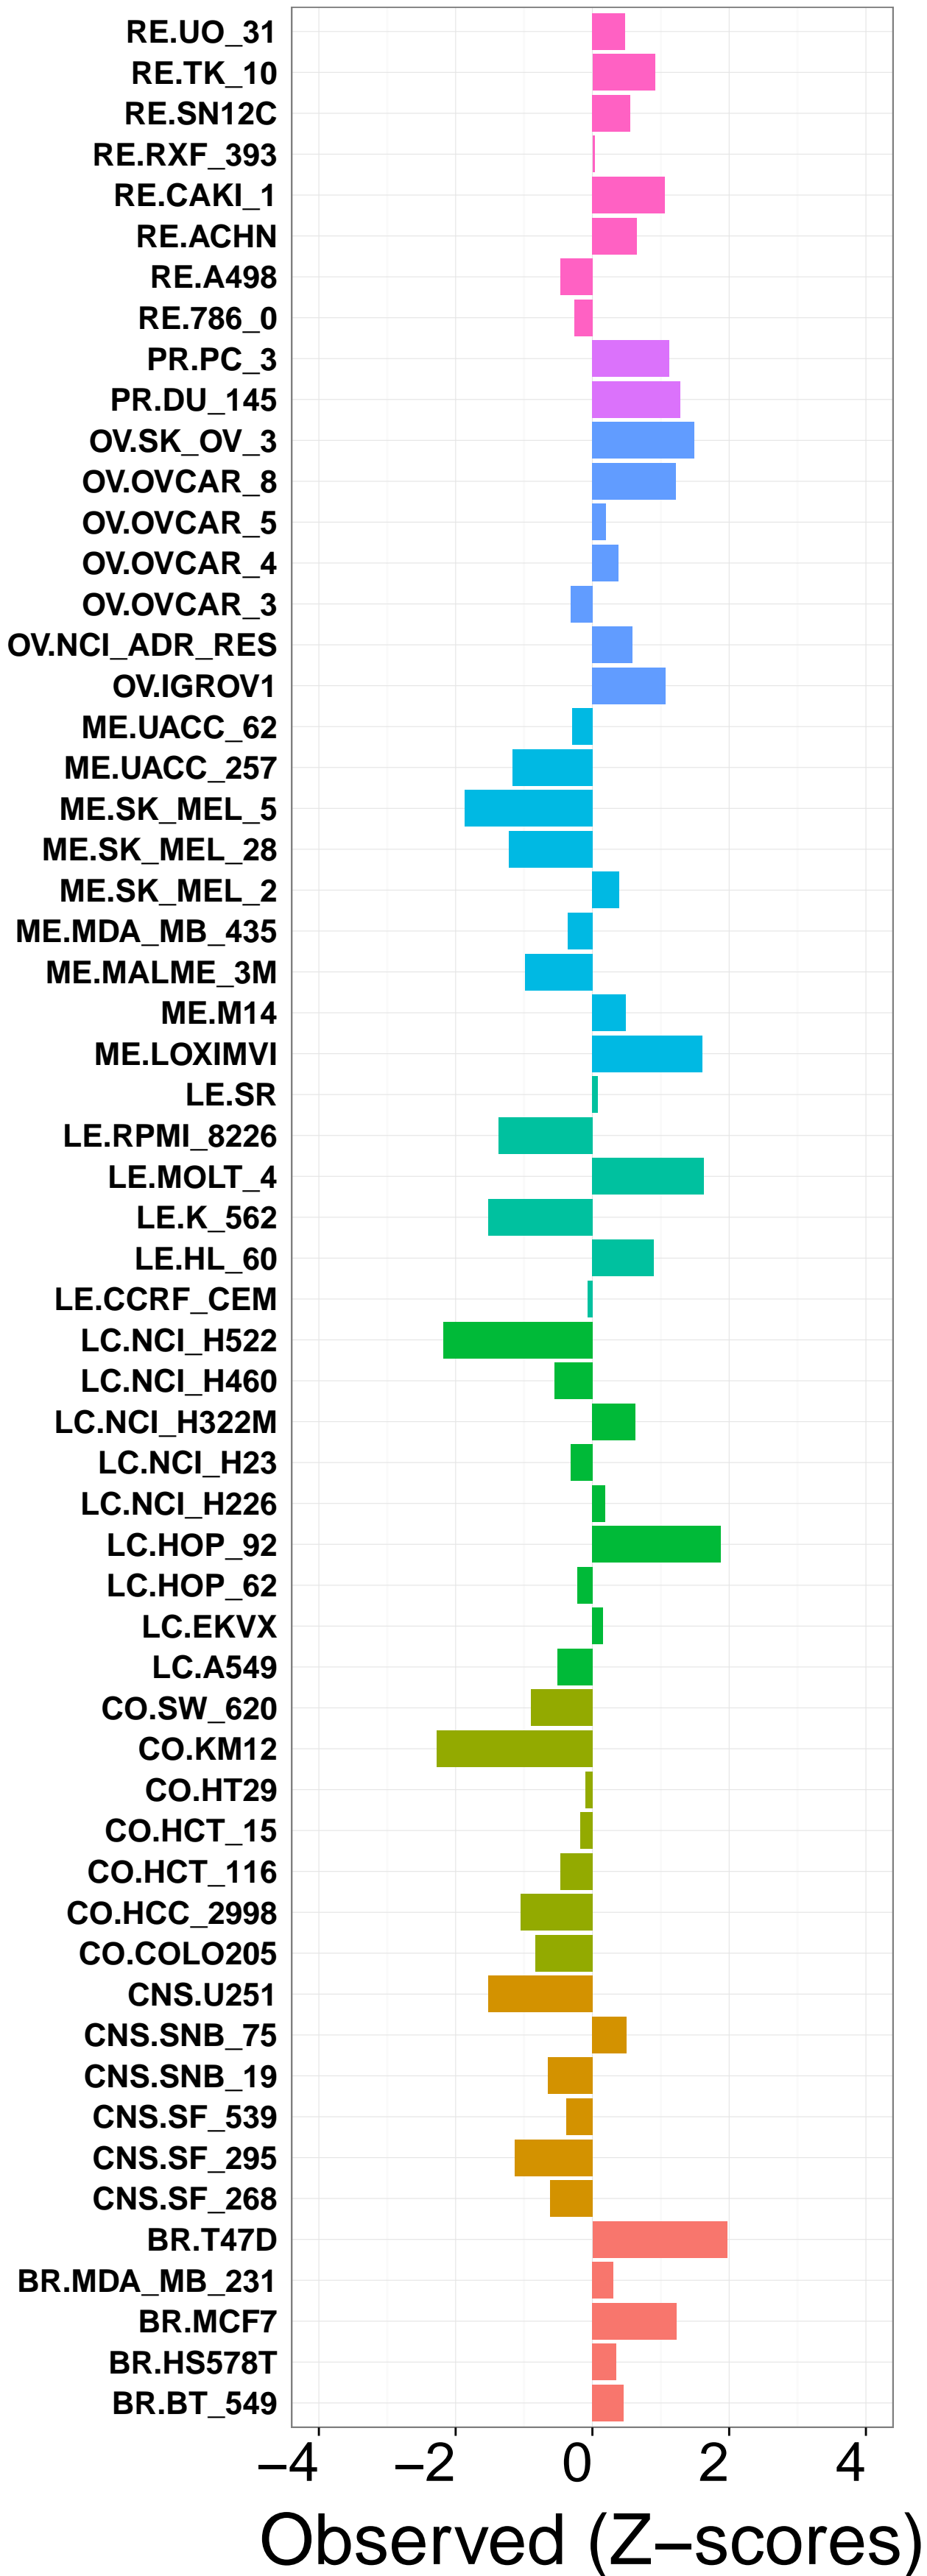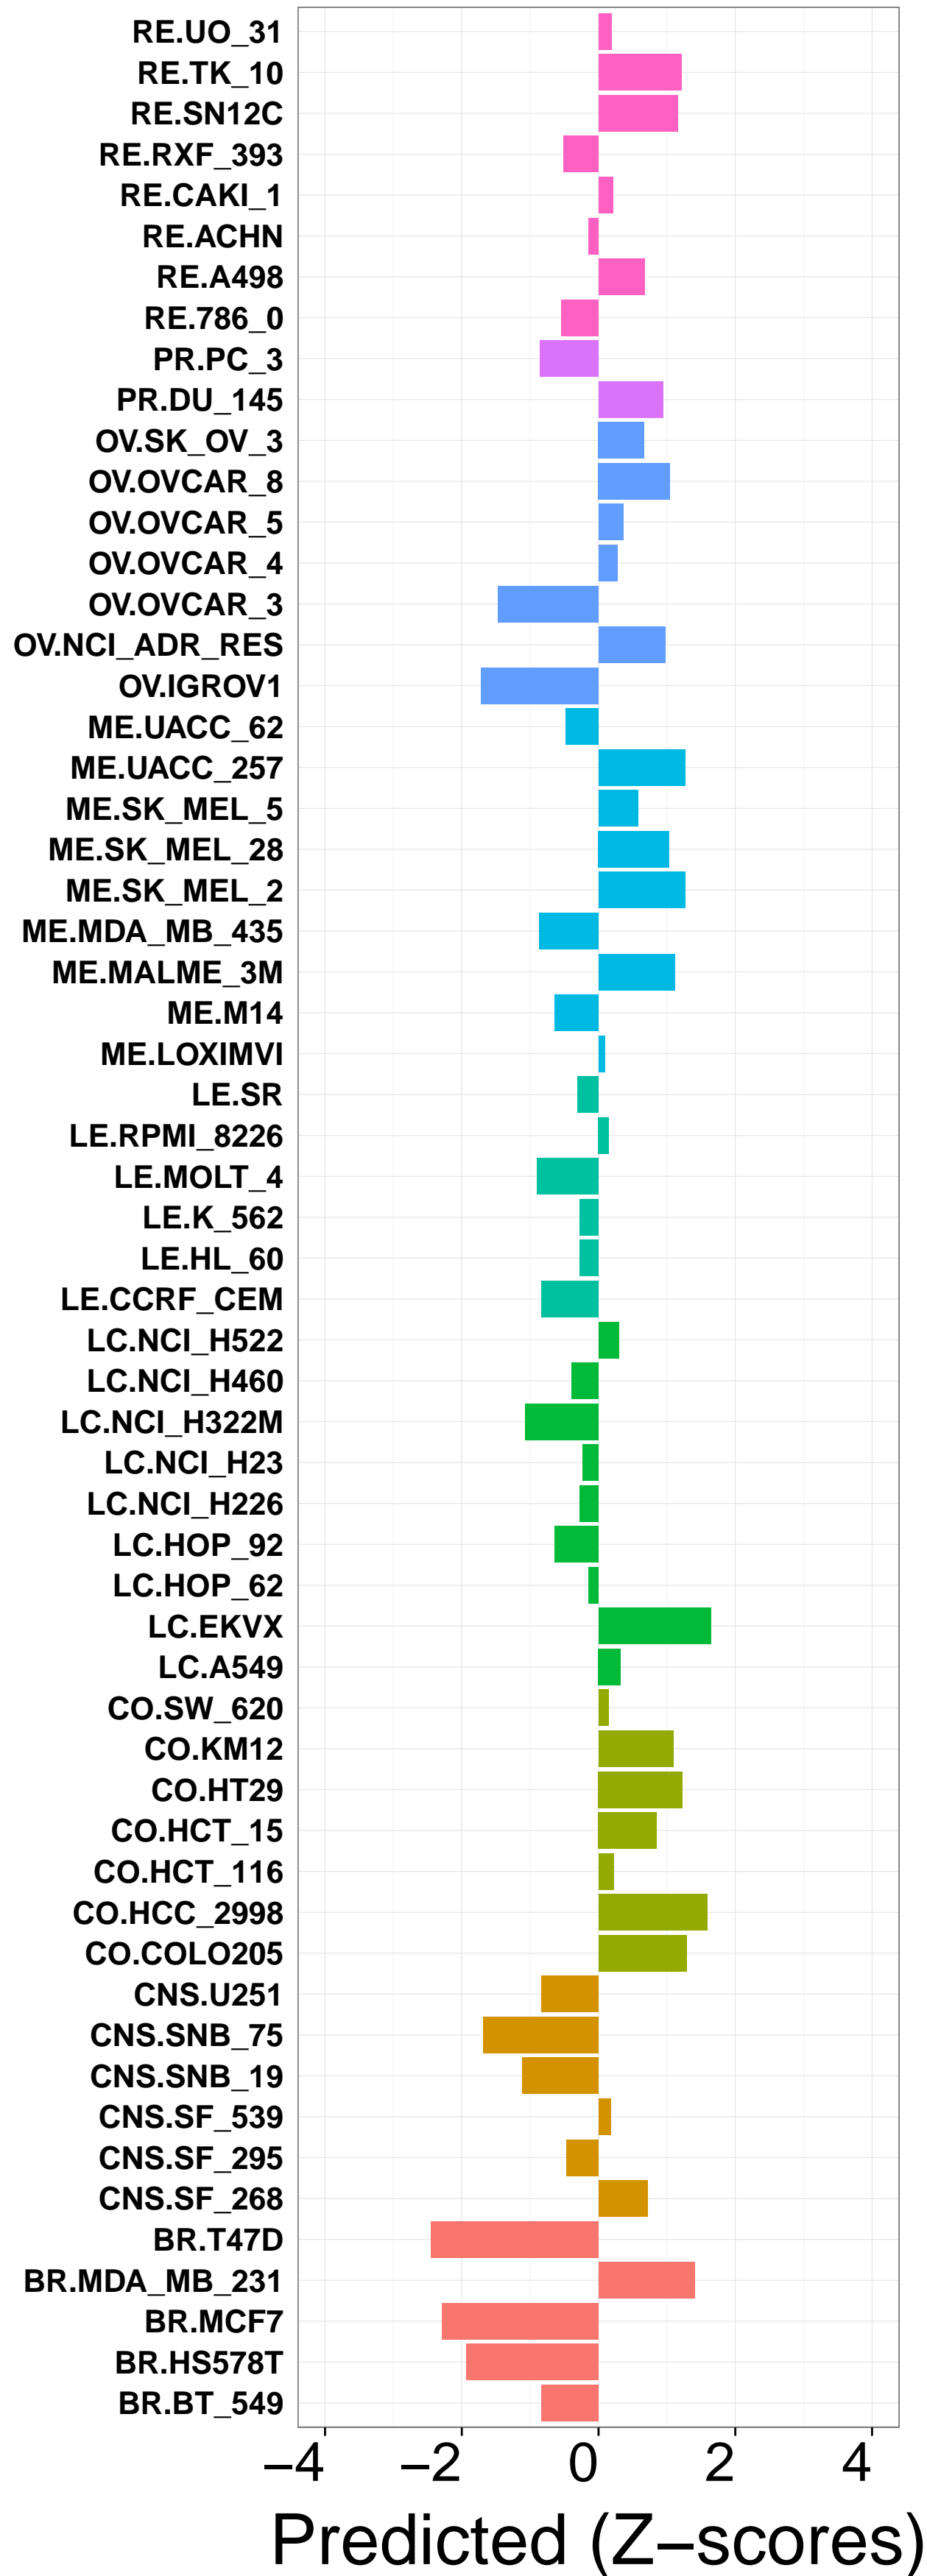

# NSC 281612, (LOTO)

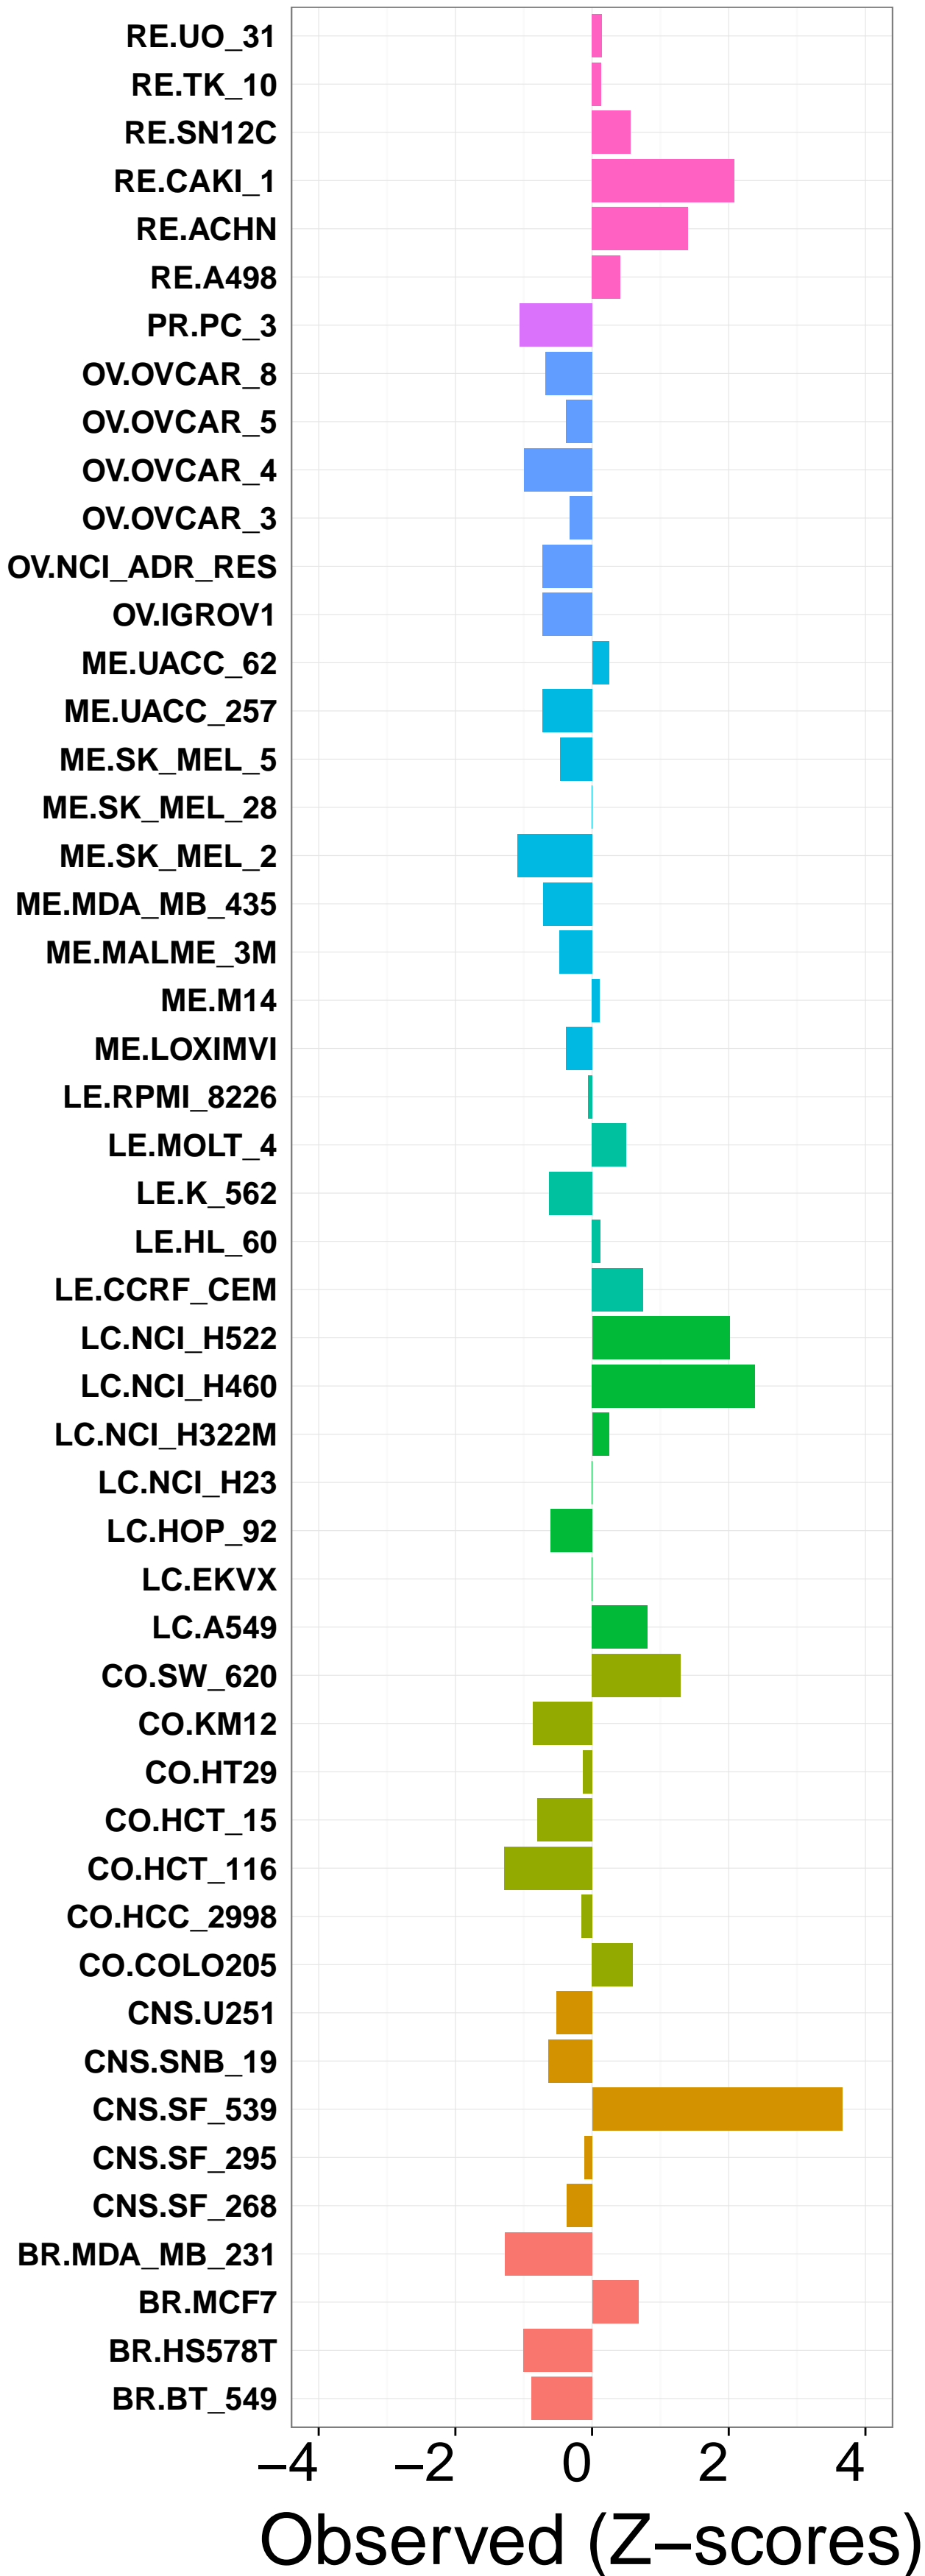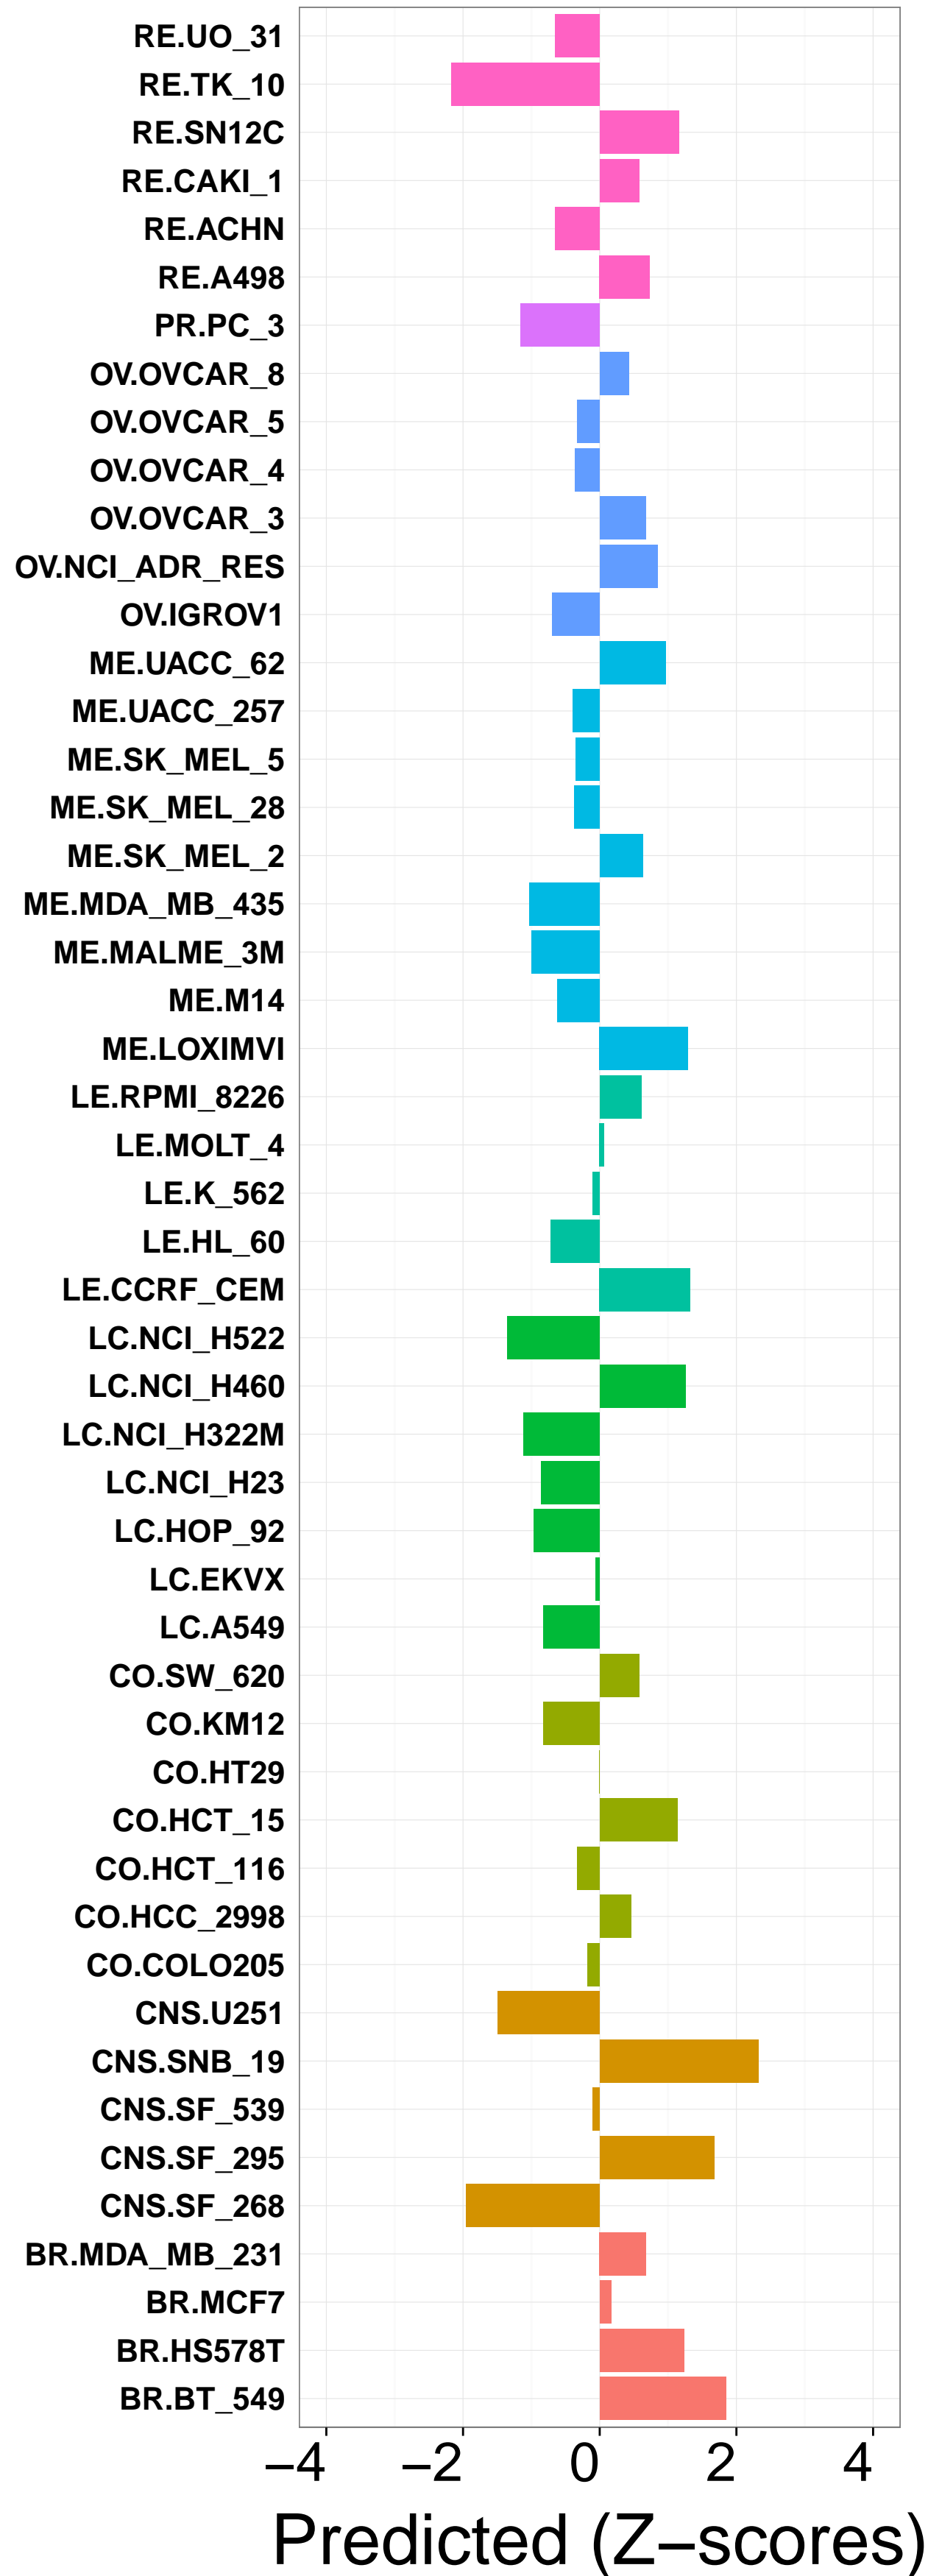

# NSC 287459, (LOTO)

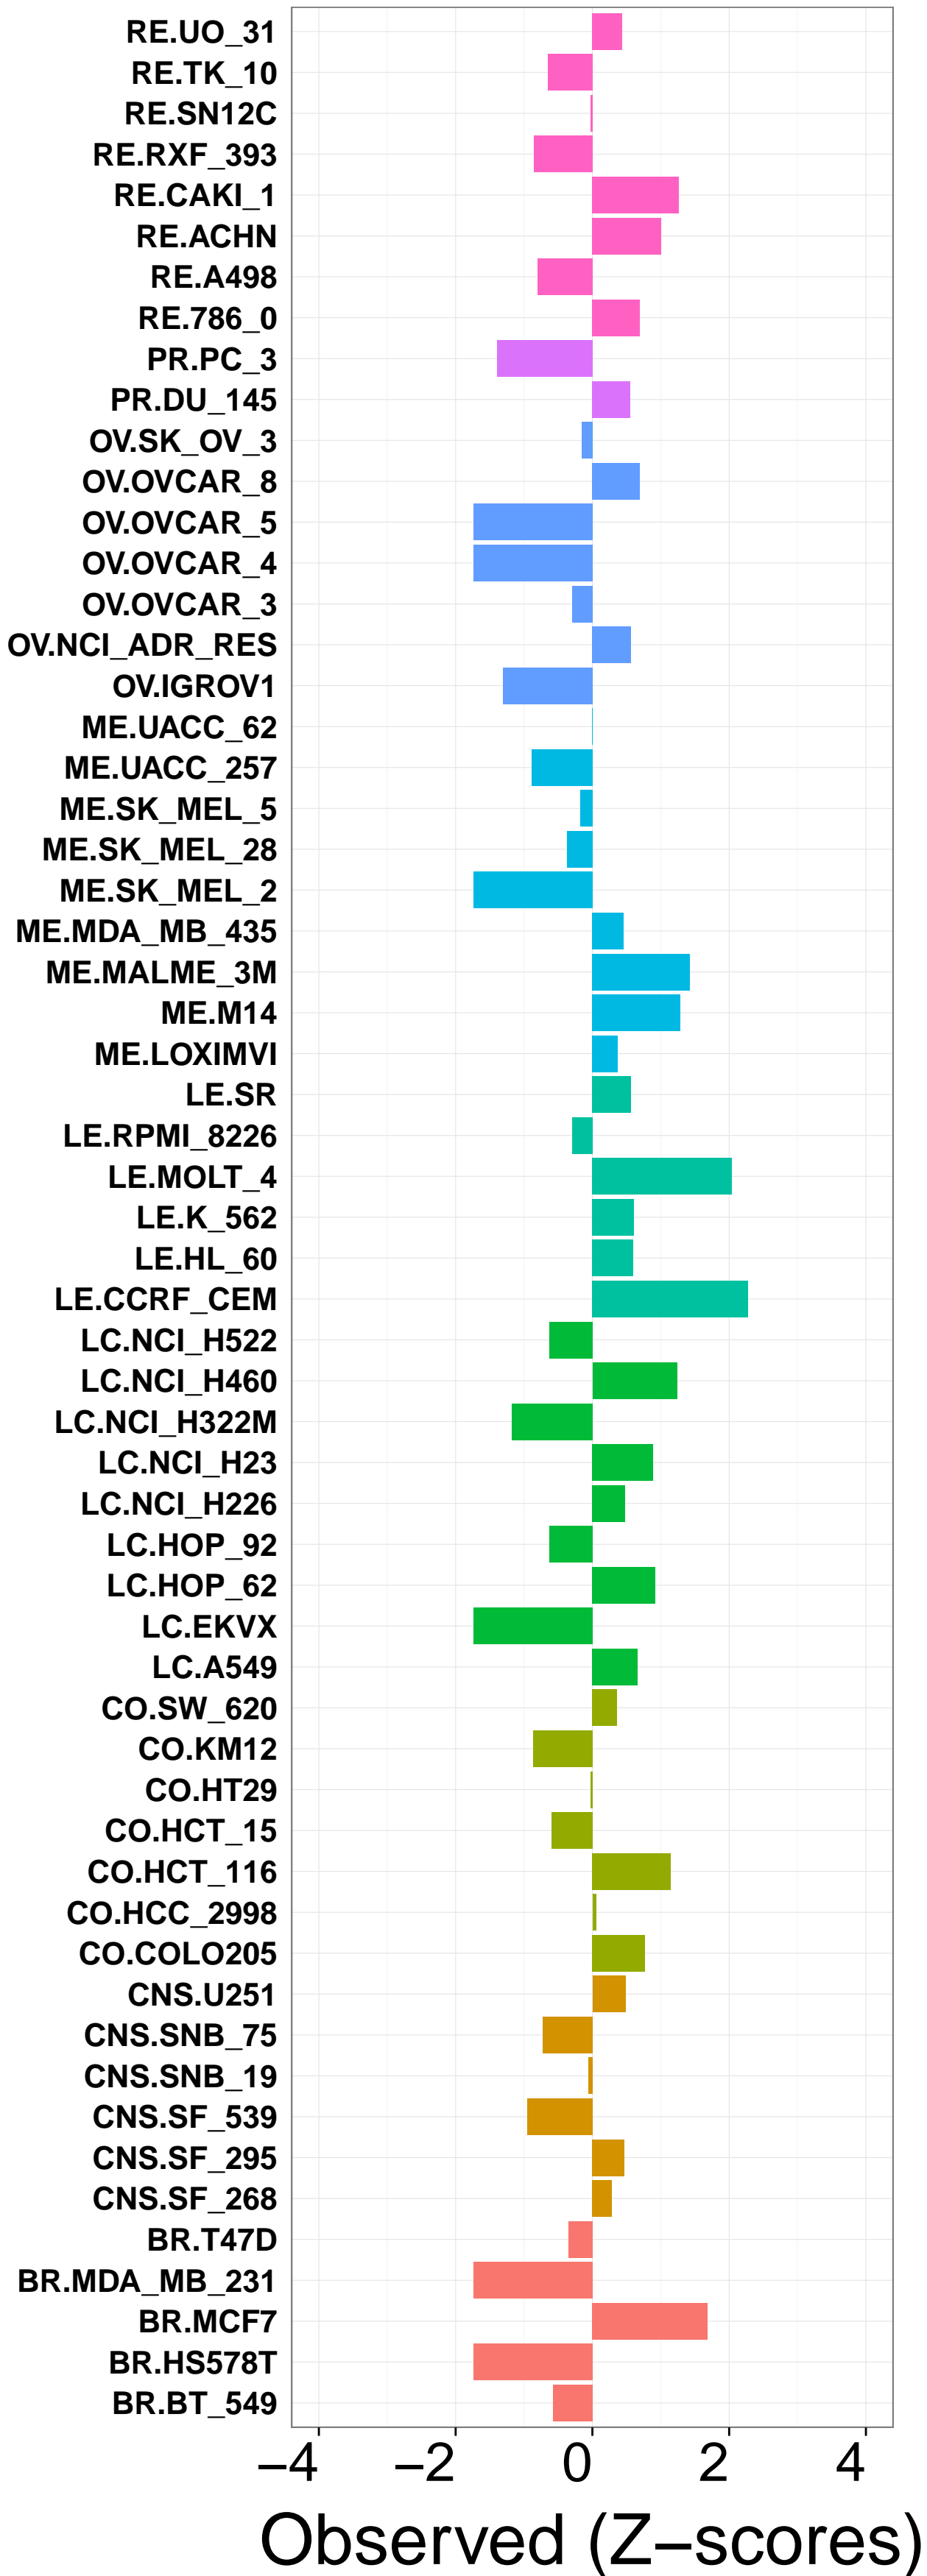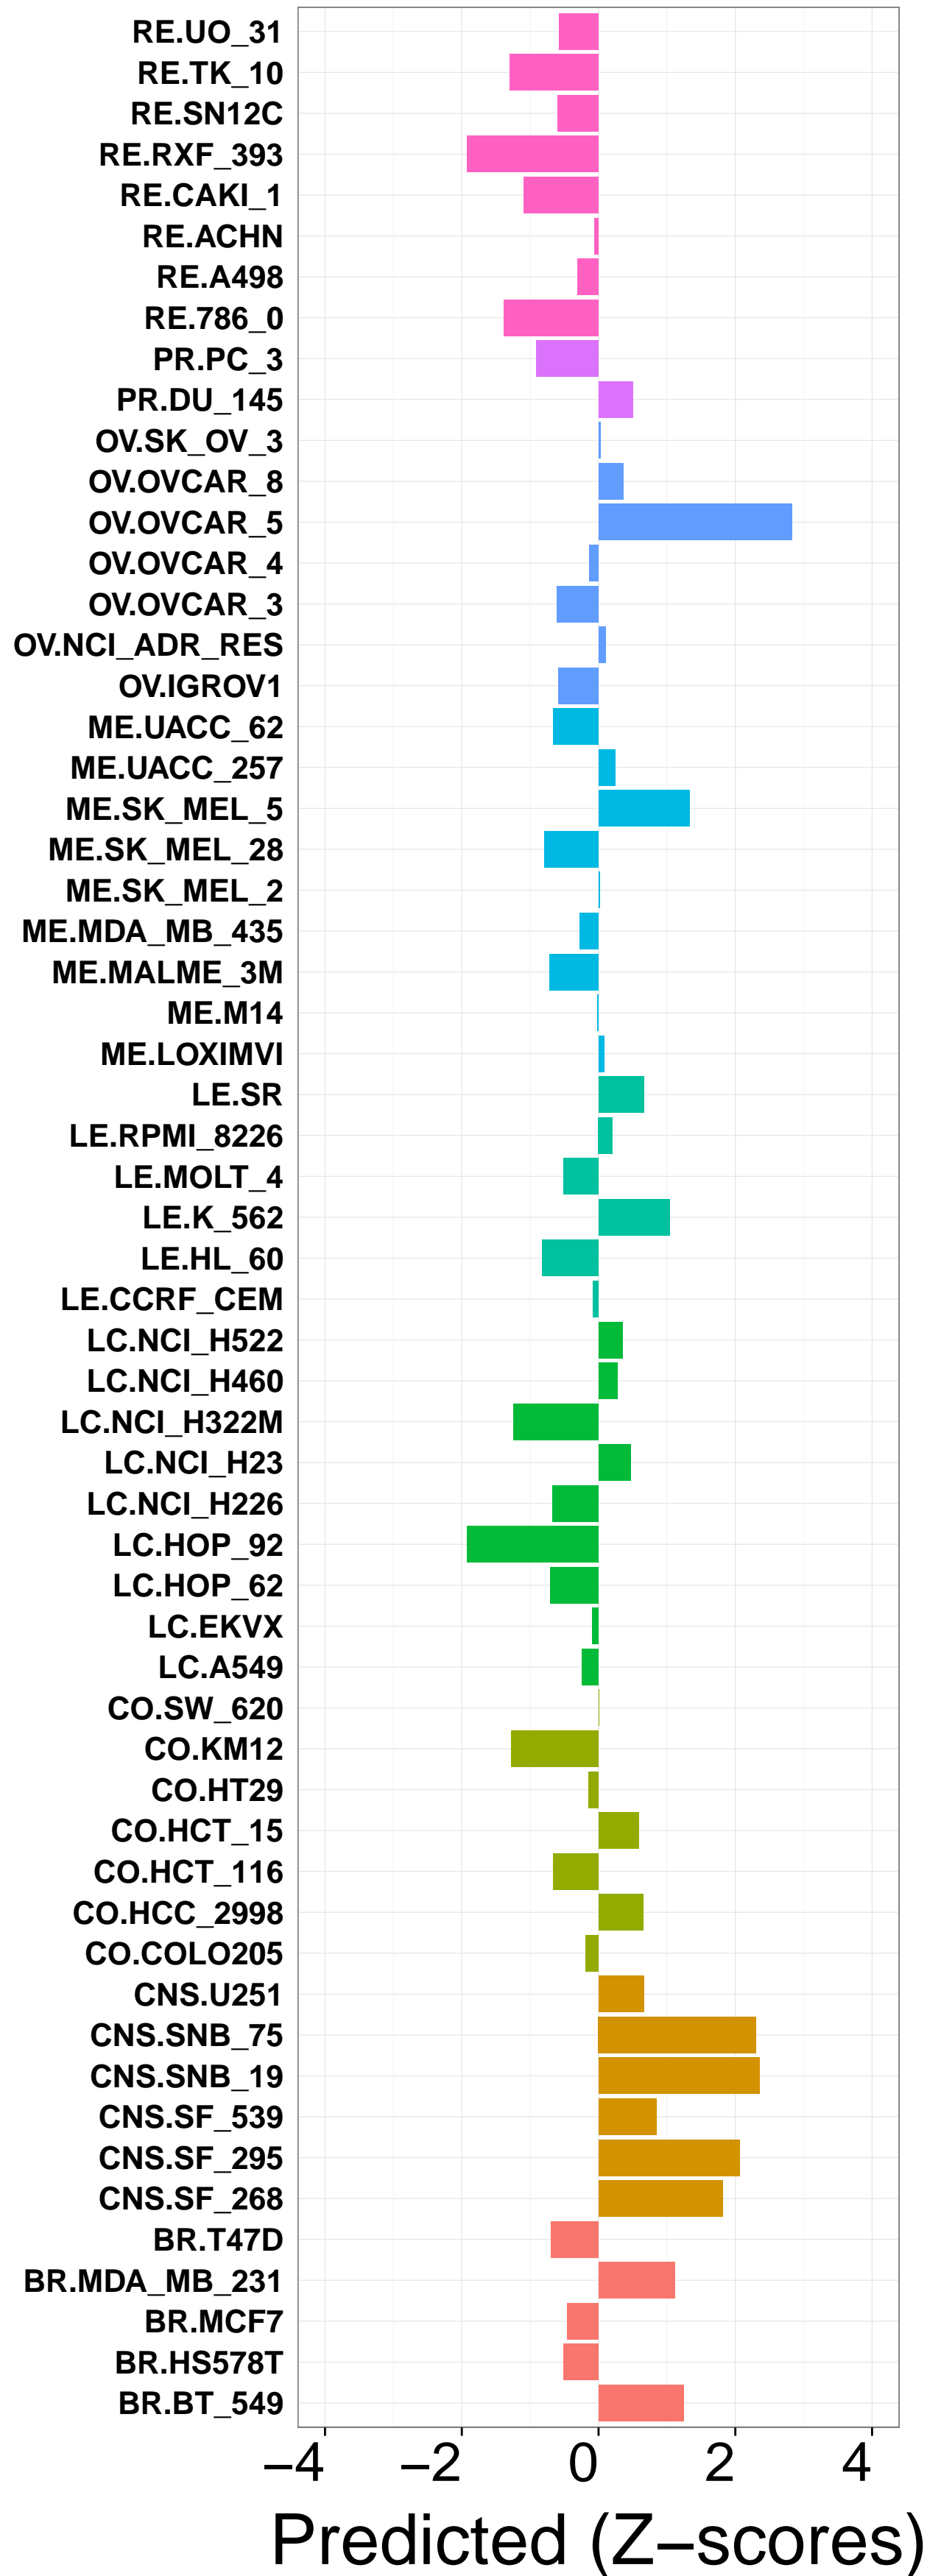



# NSC 301739, (LOTO)



# NSC 312887, Fludarabine\_phosphate\_(USAN) (LOTO)

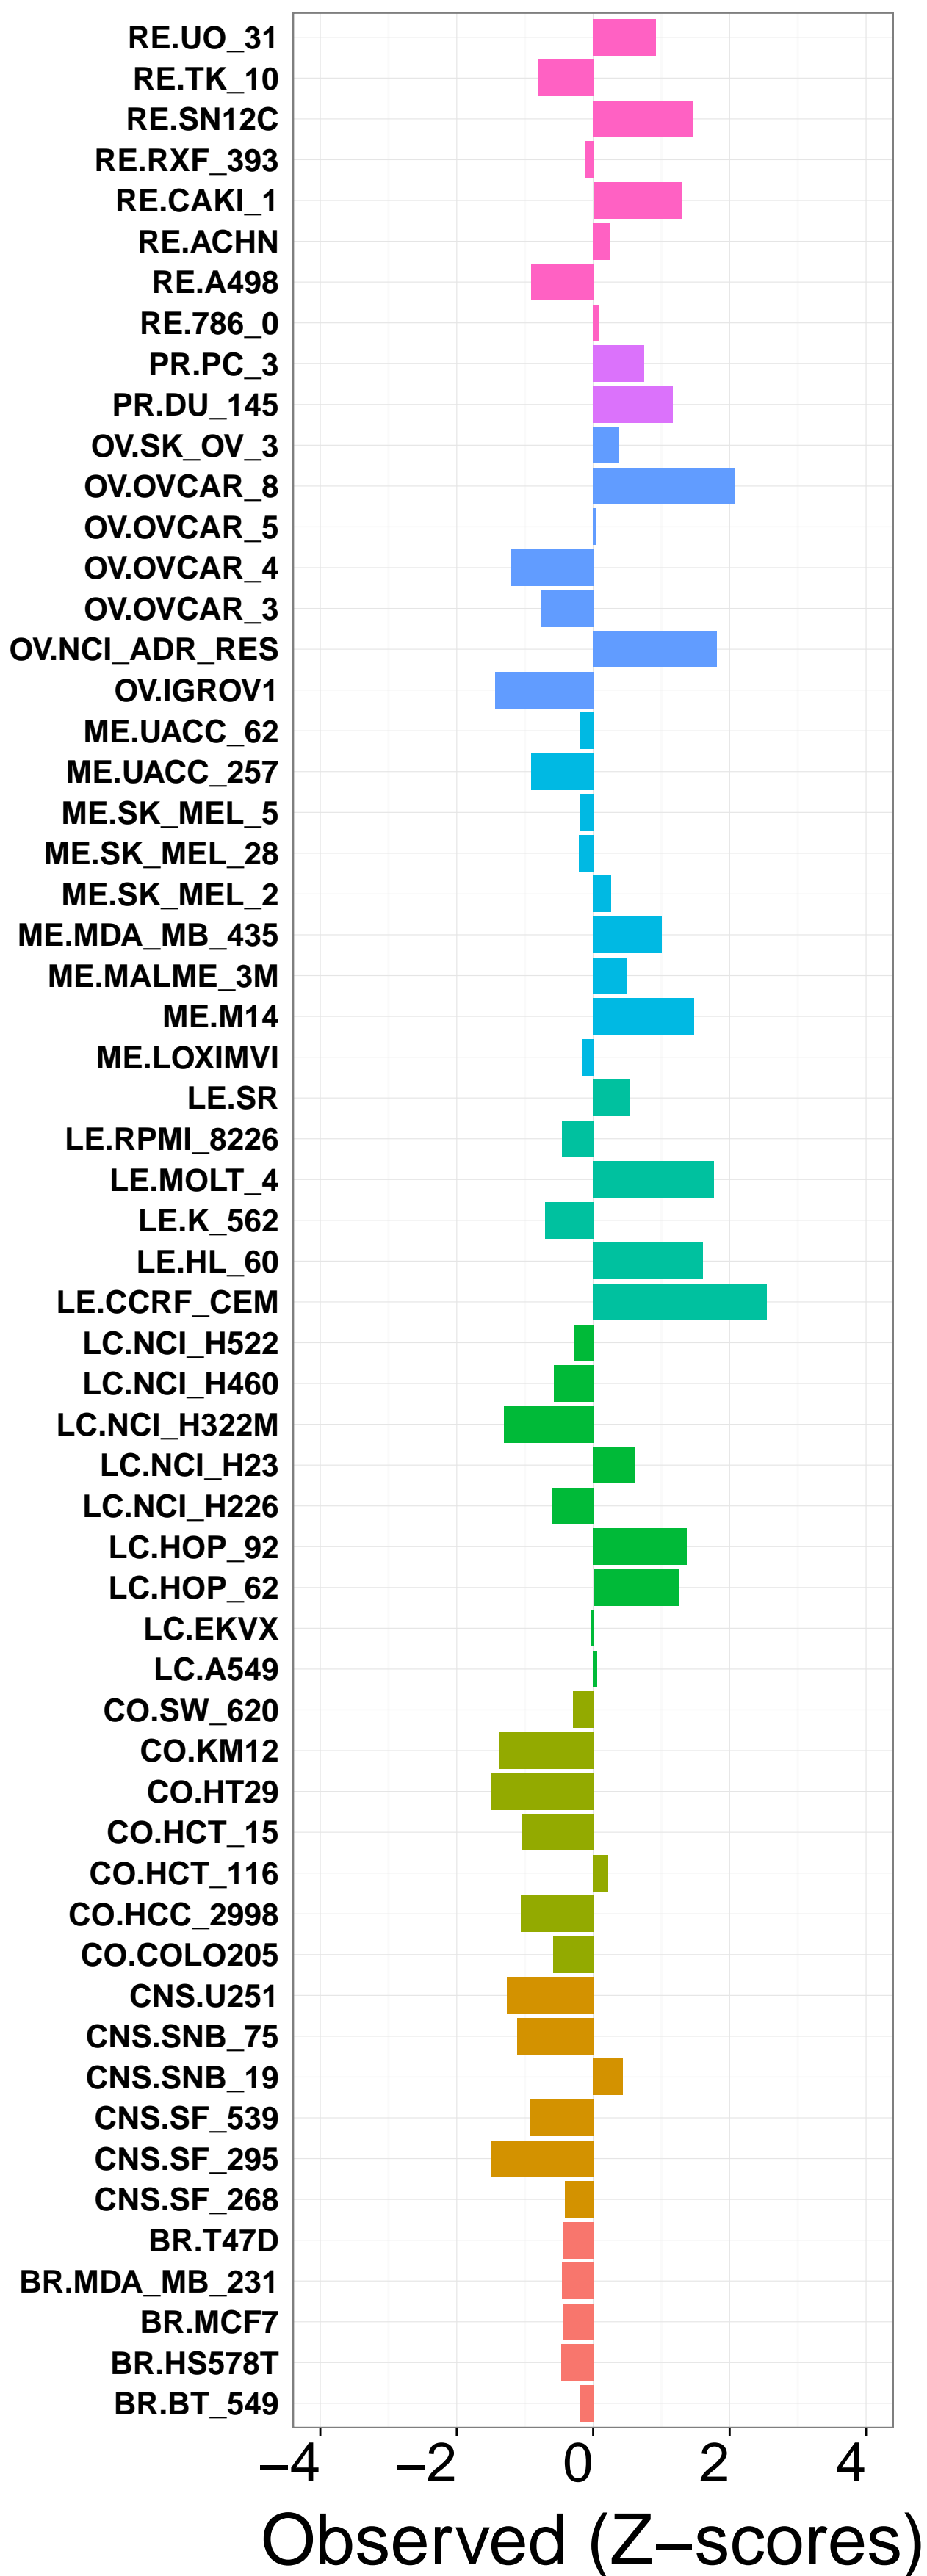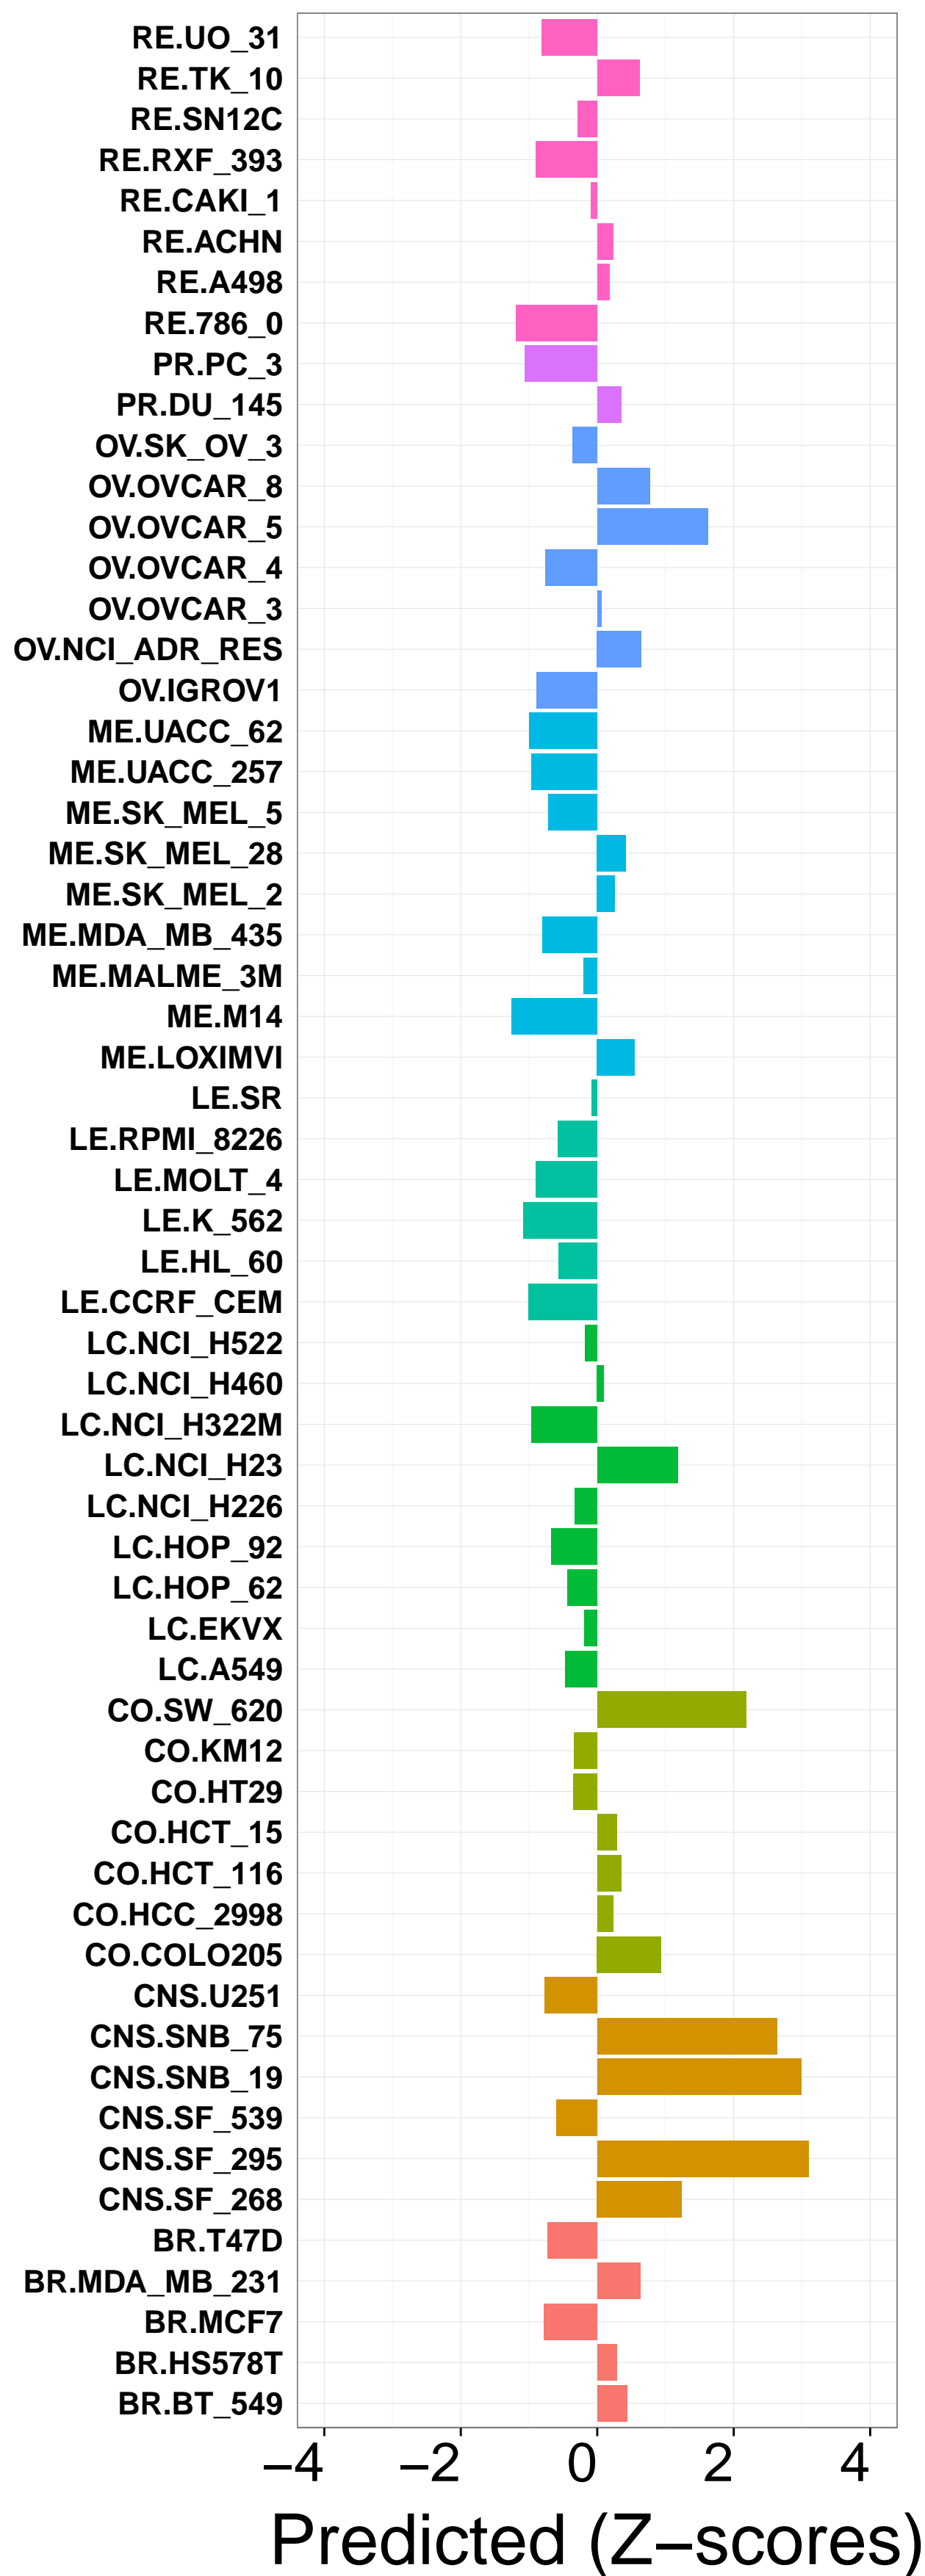

# NSC 330507, Tanespimycin (LOTO)

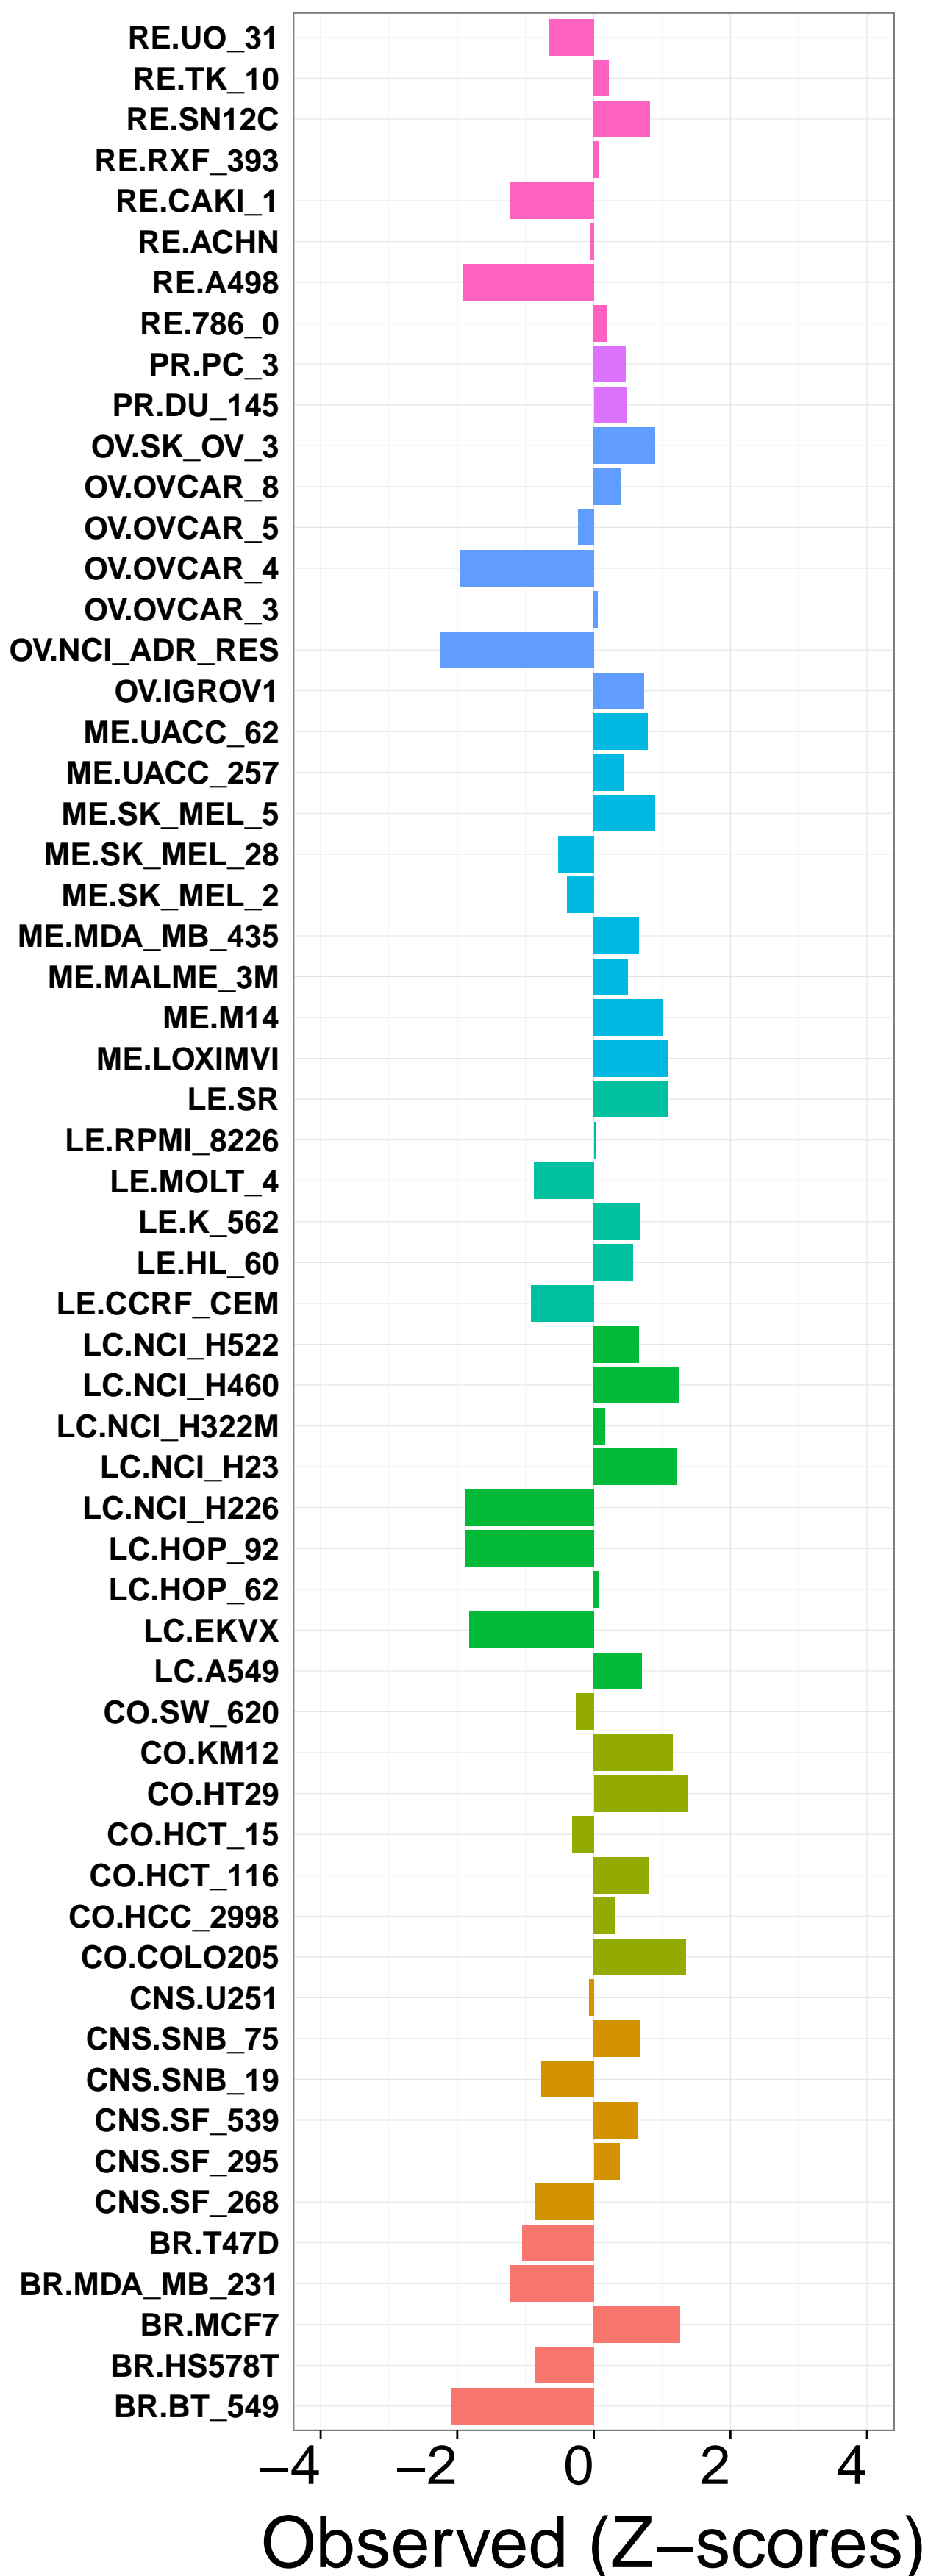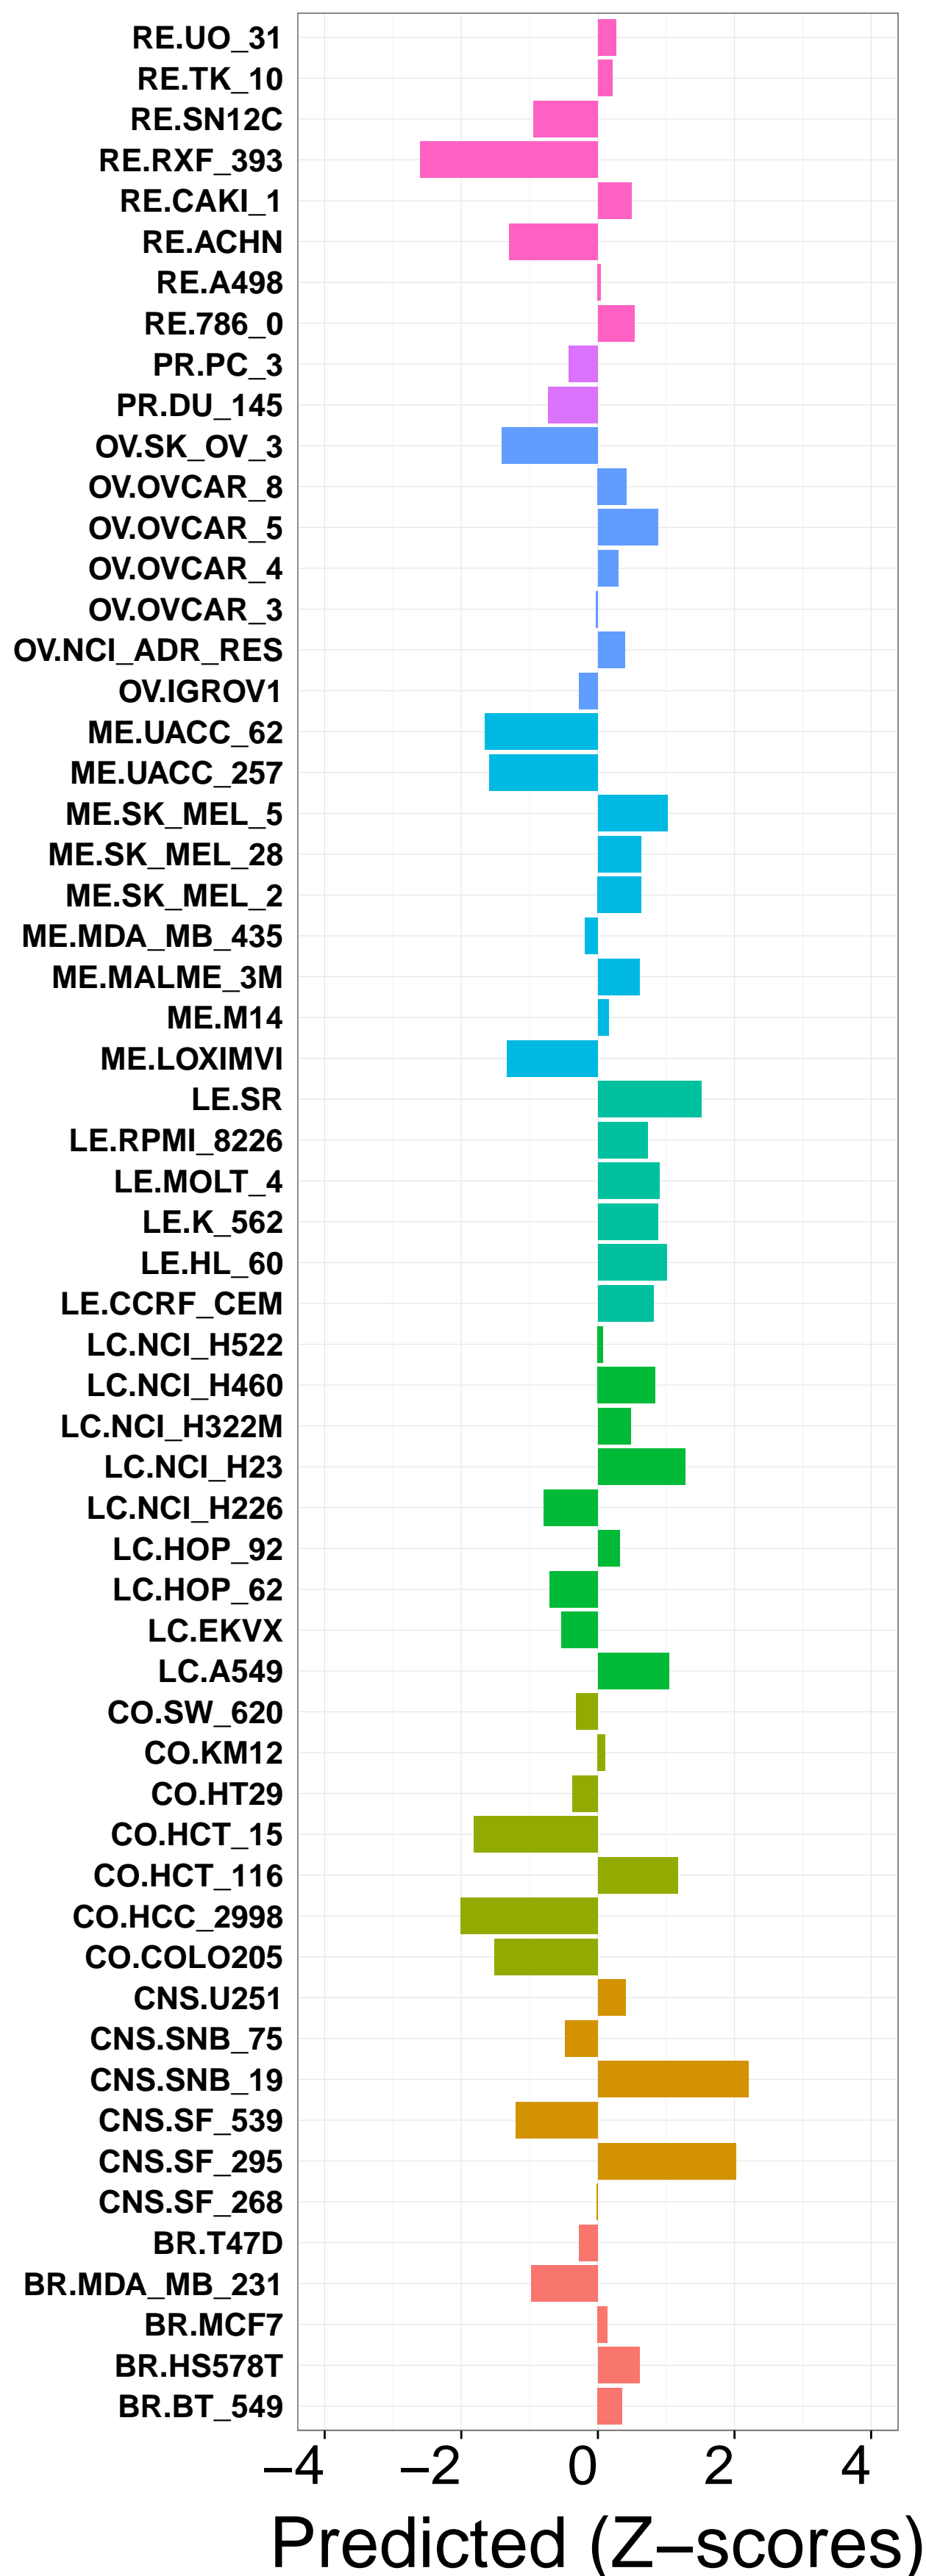

# NSC 34521, Dextromethorphan\_Hydrobromide (LOTO)

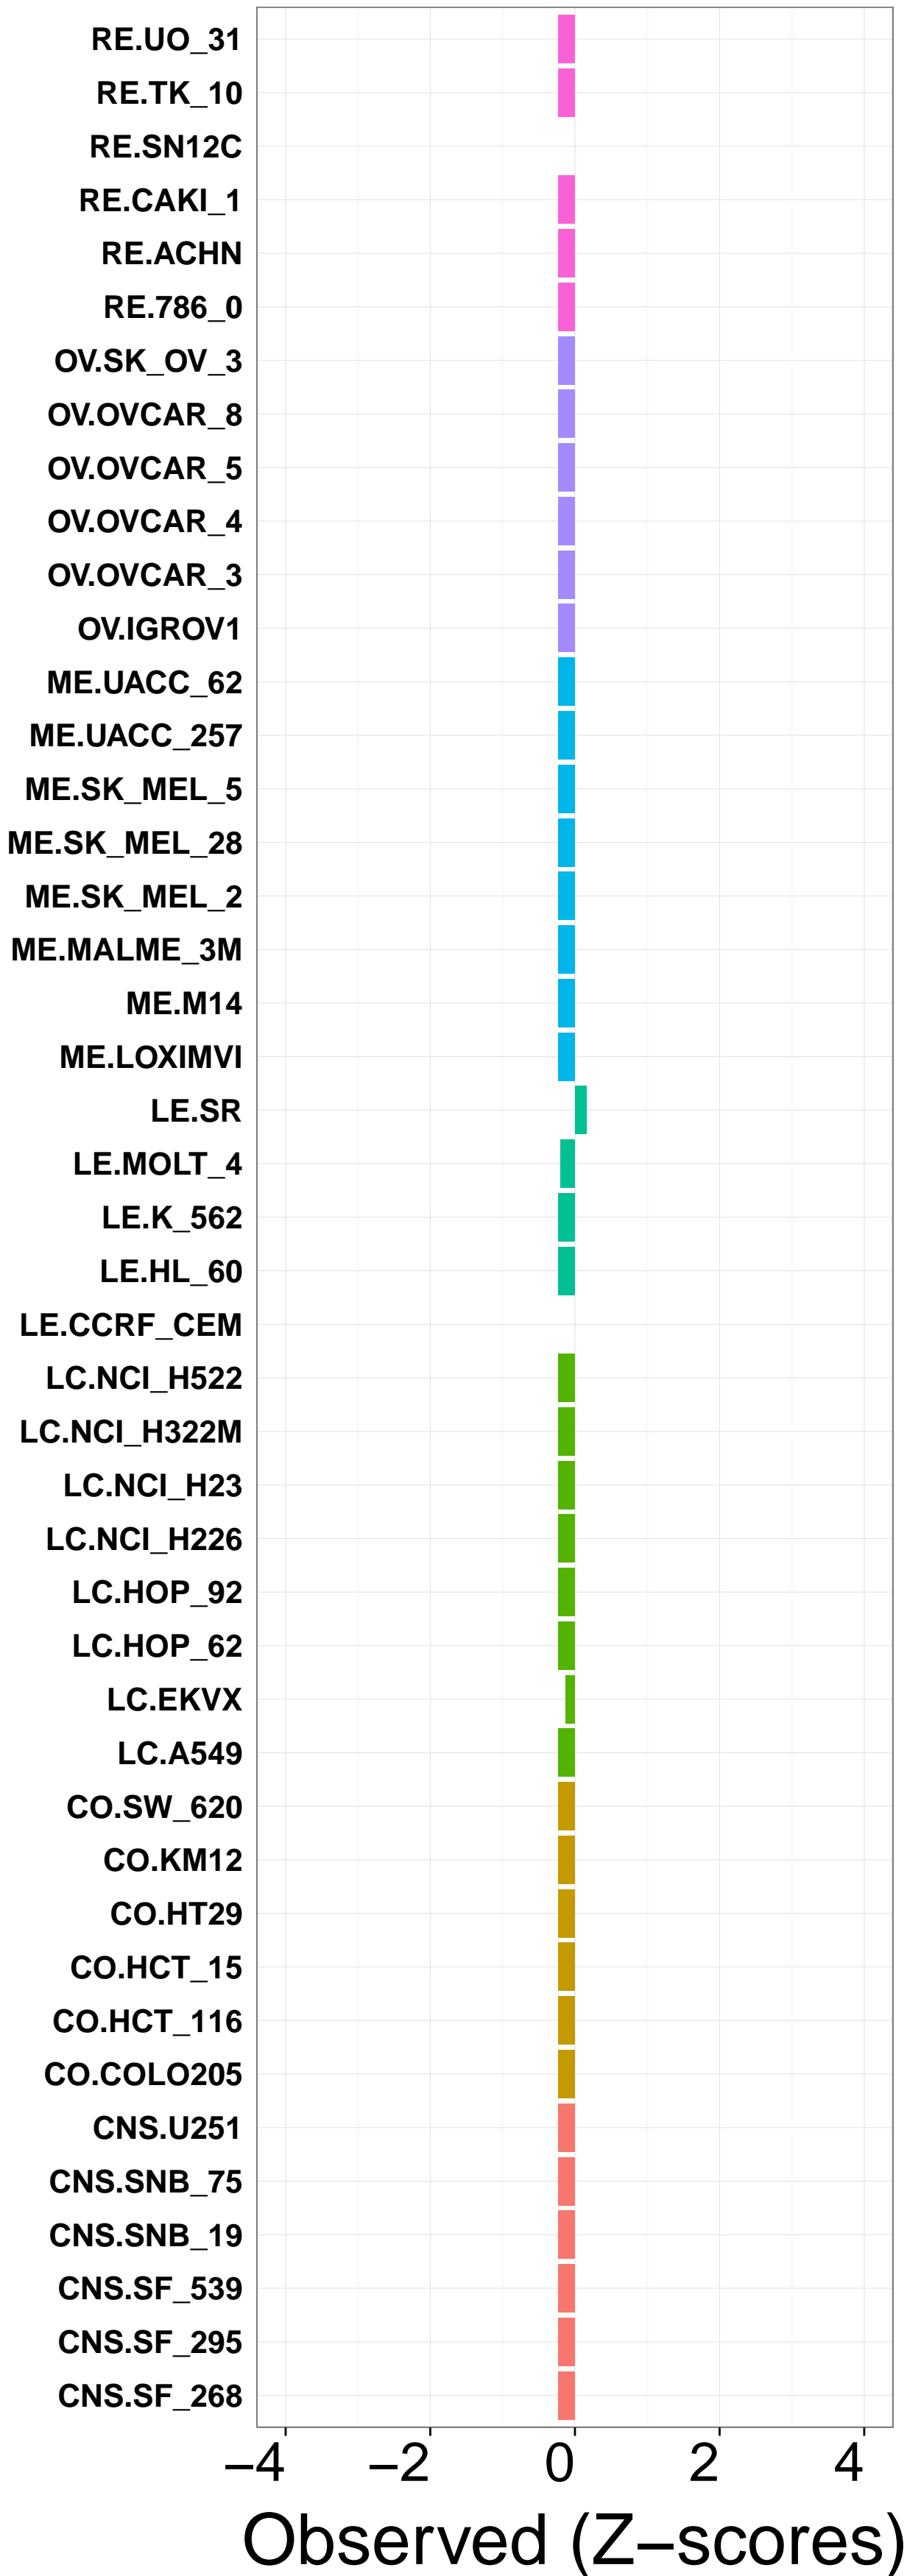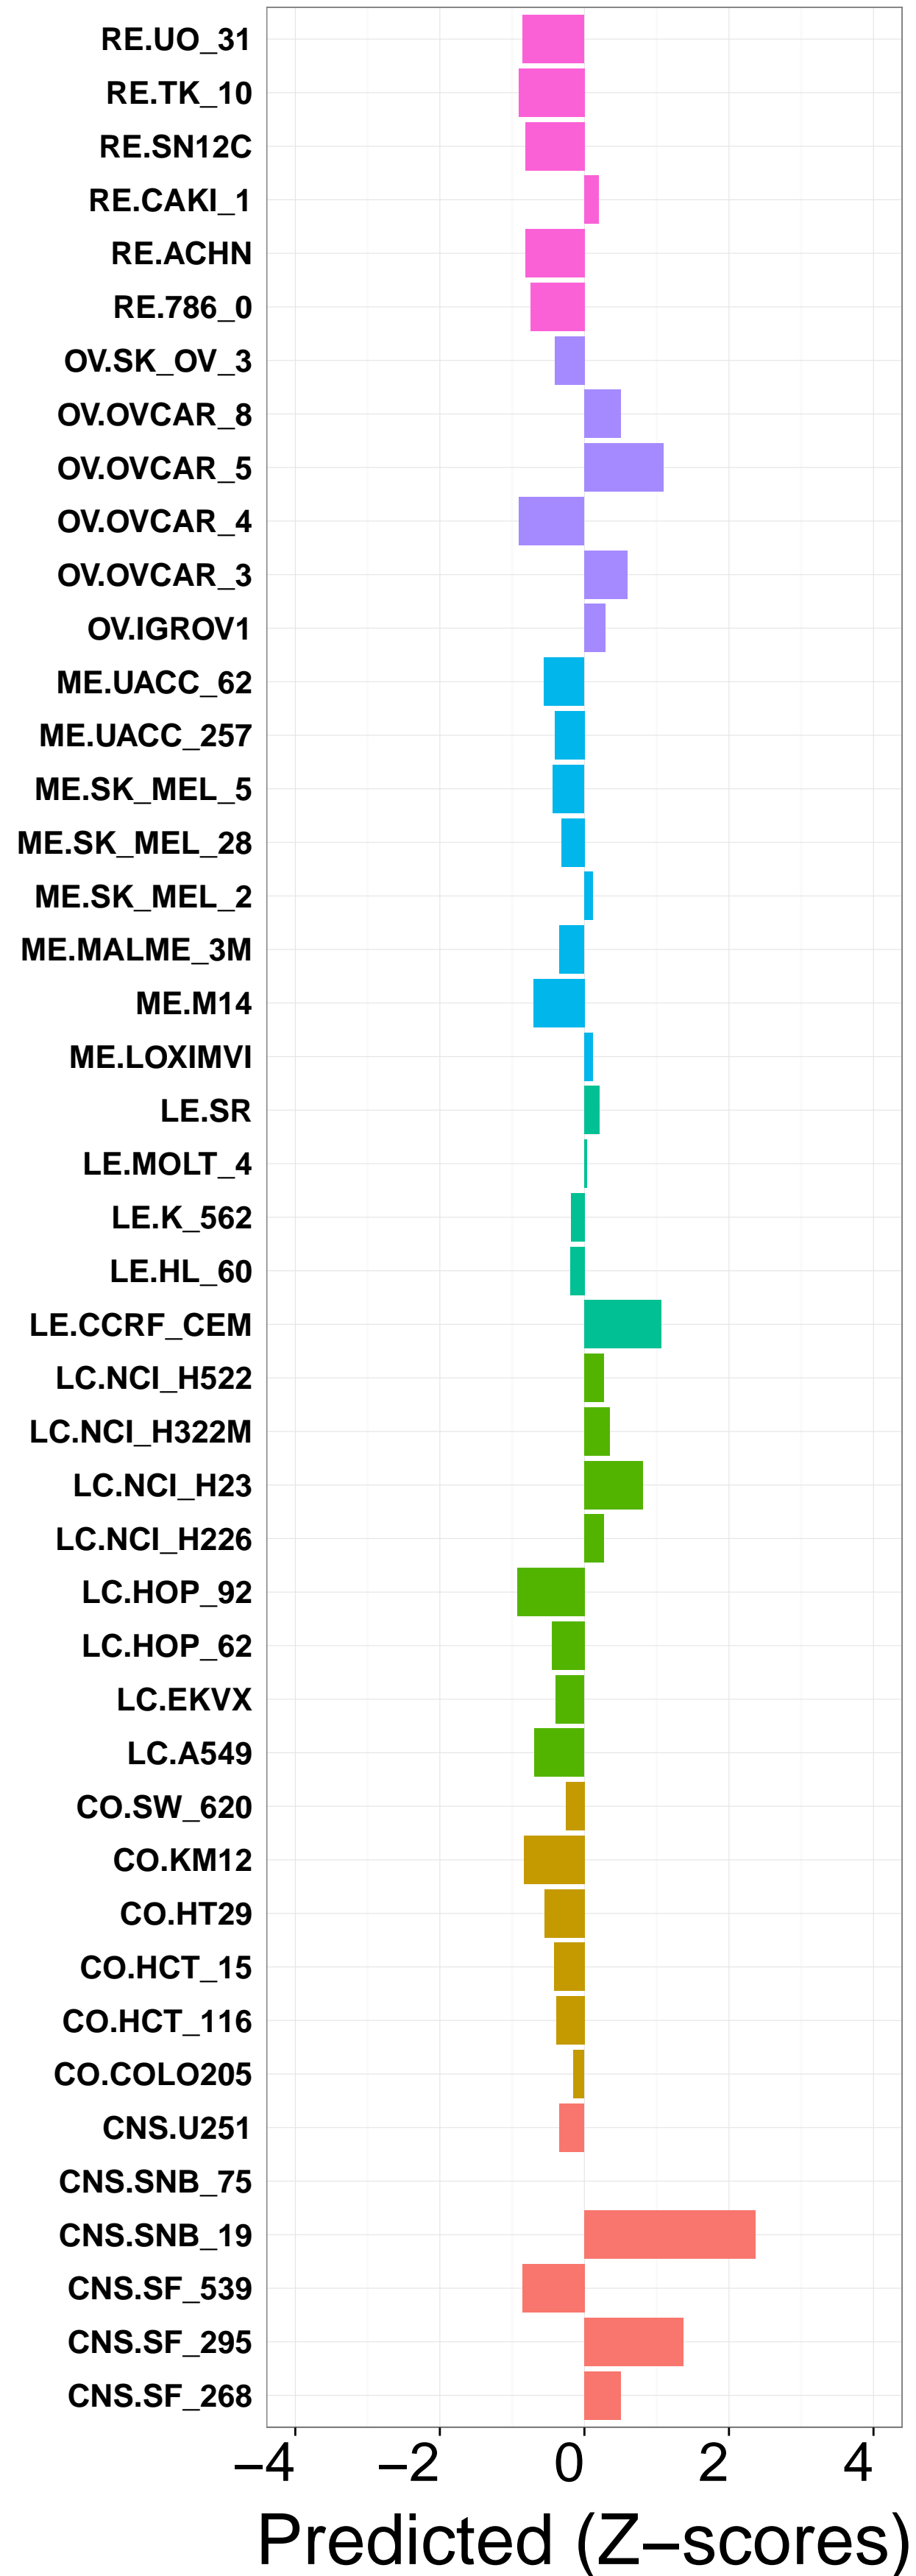

# NSC 354258, 8-Chloro-Adenosine (LOTO)

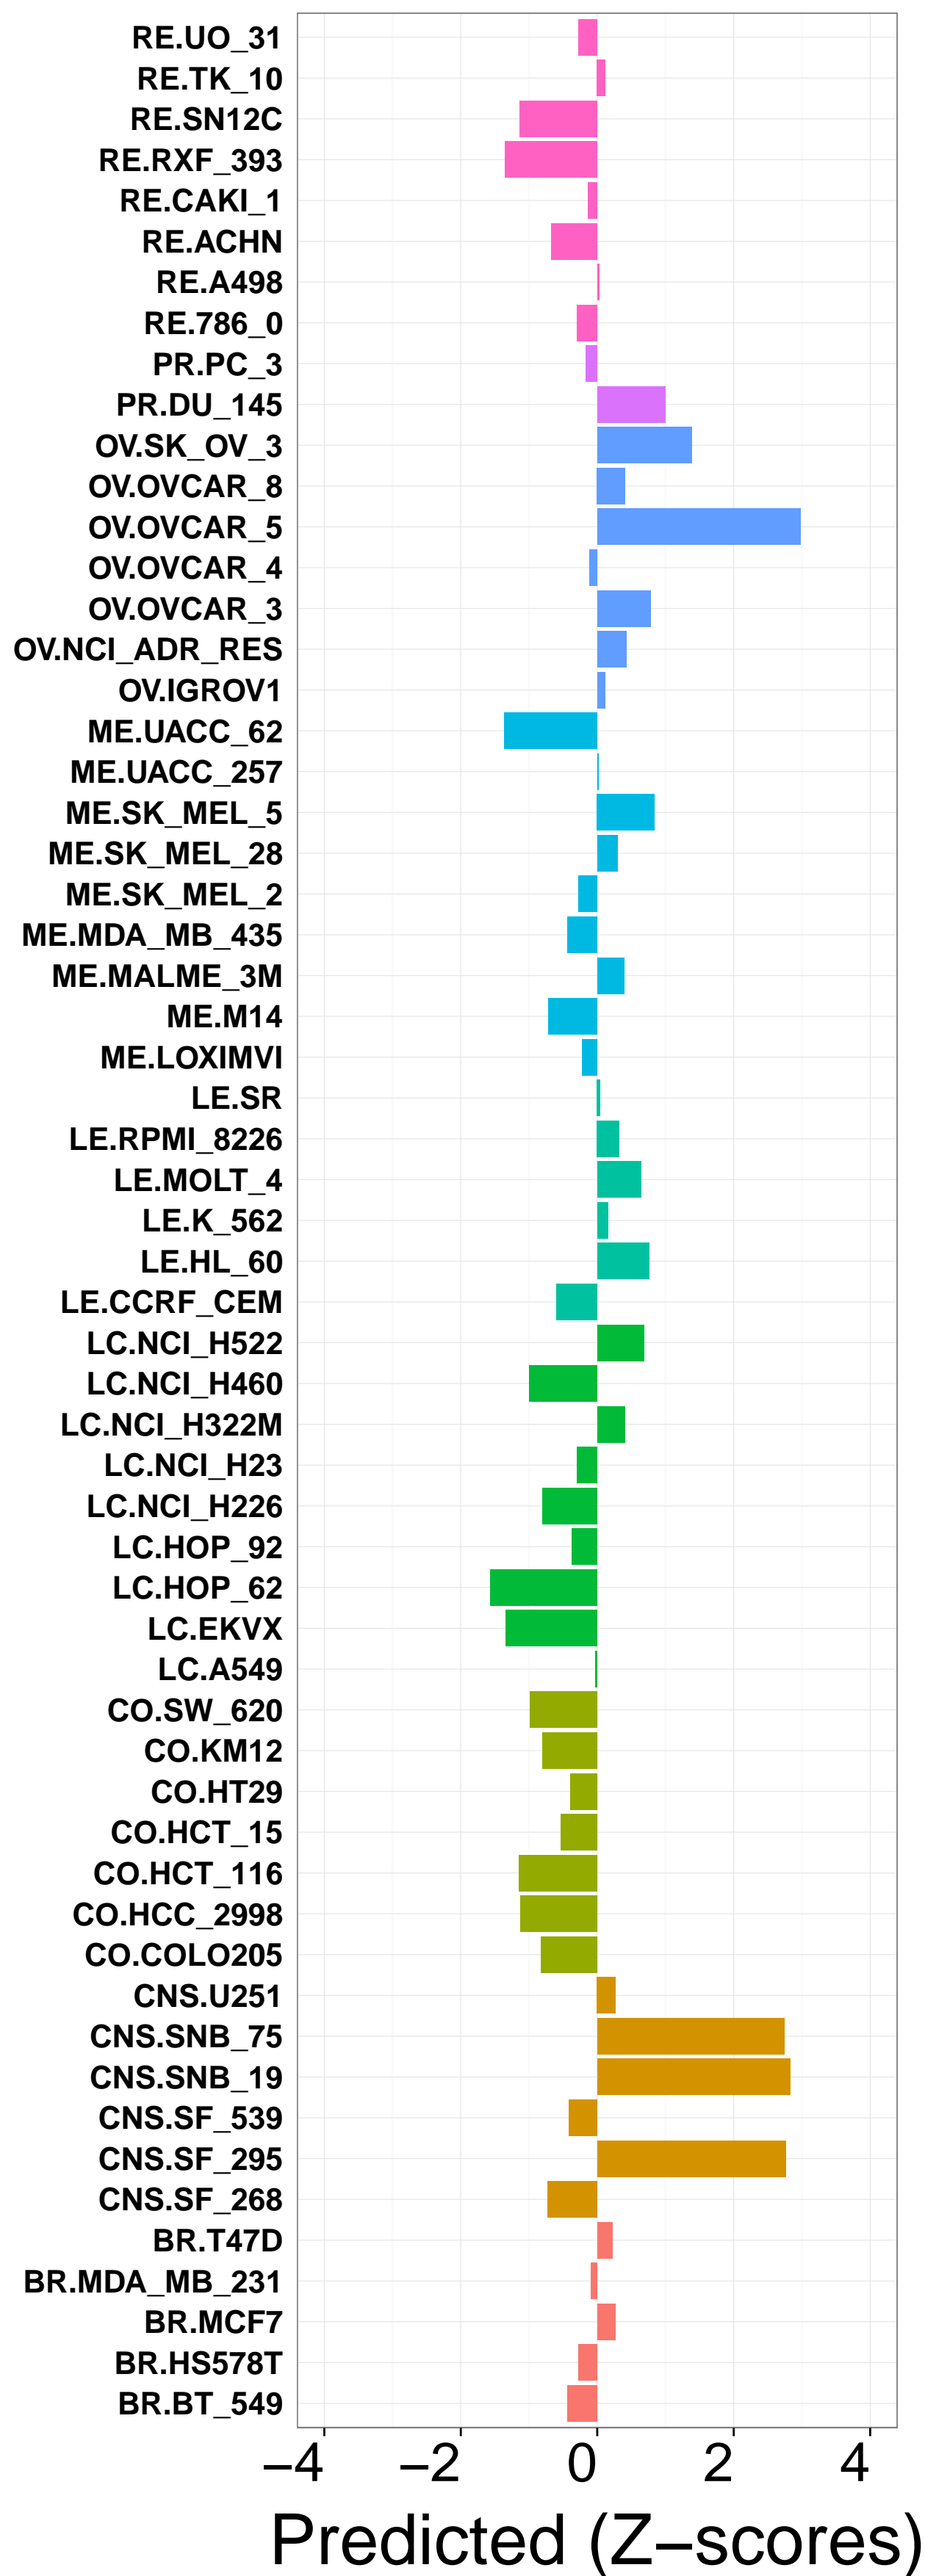



# NSC 354462, Hypothemycin (LOTO)

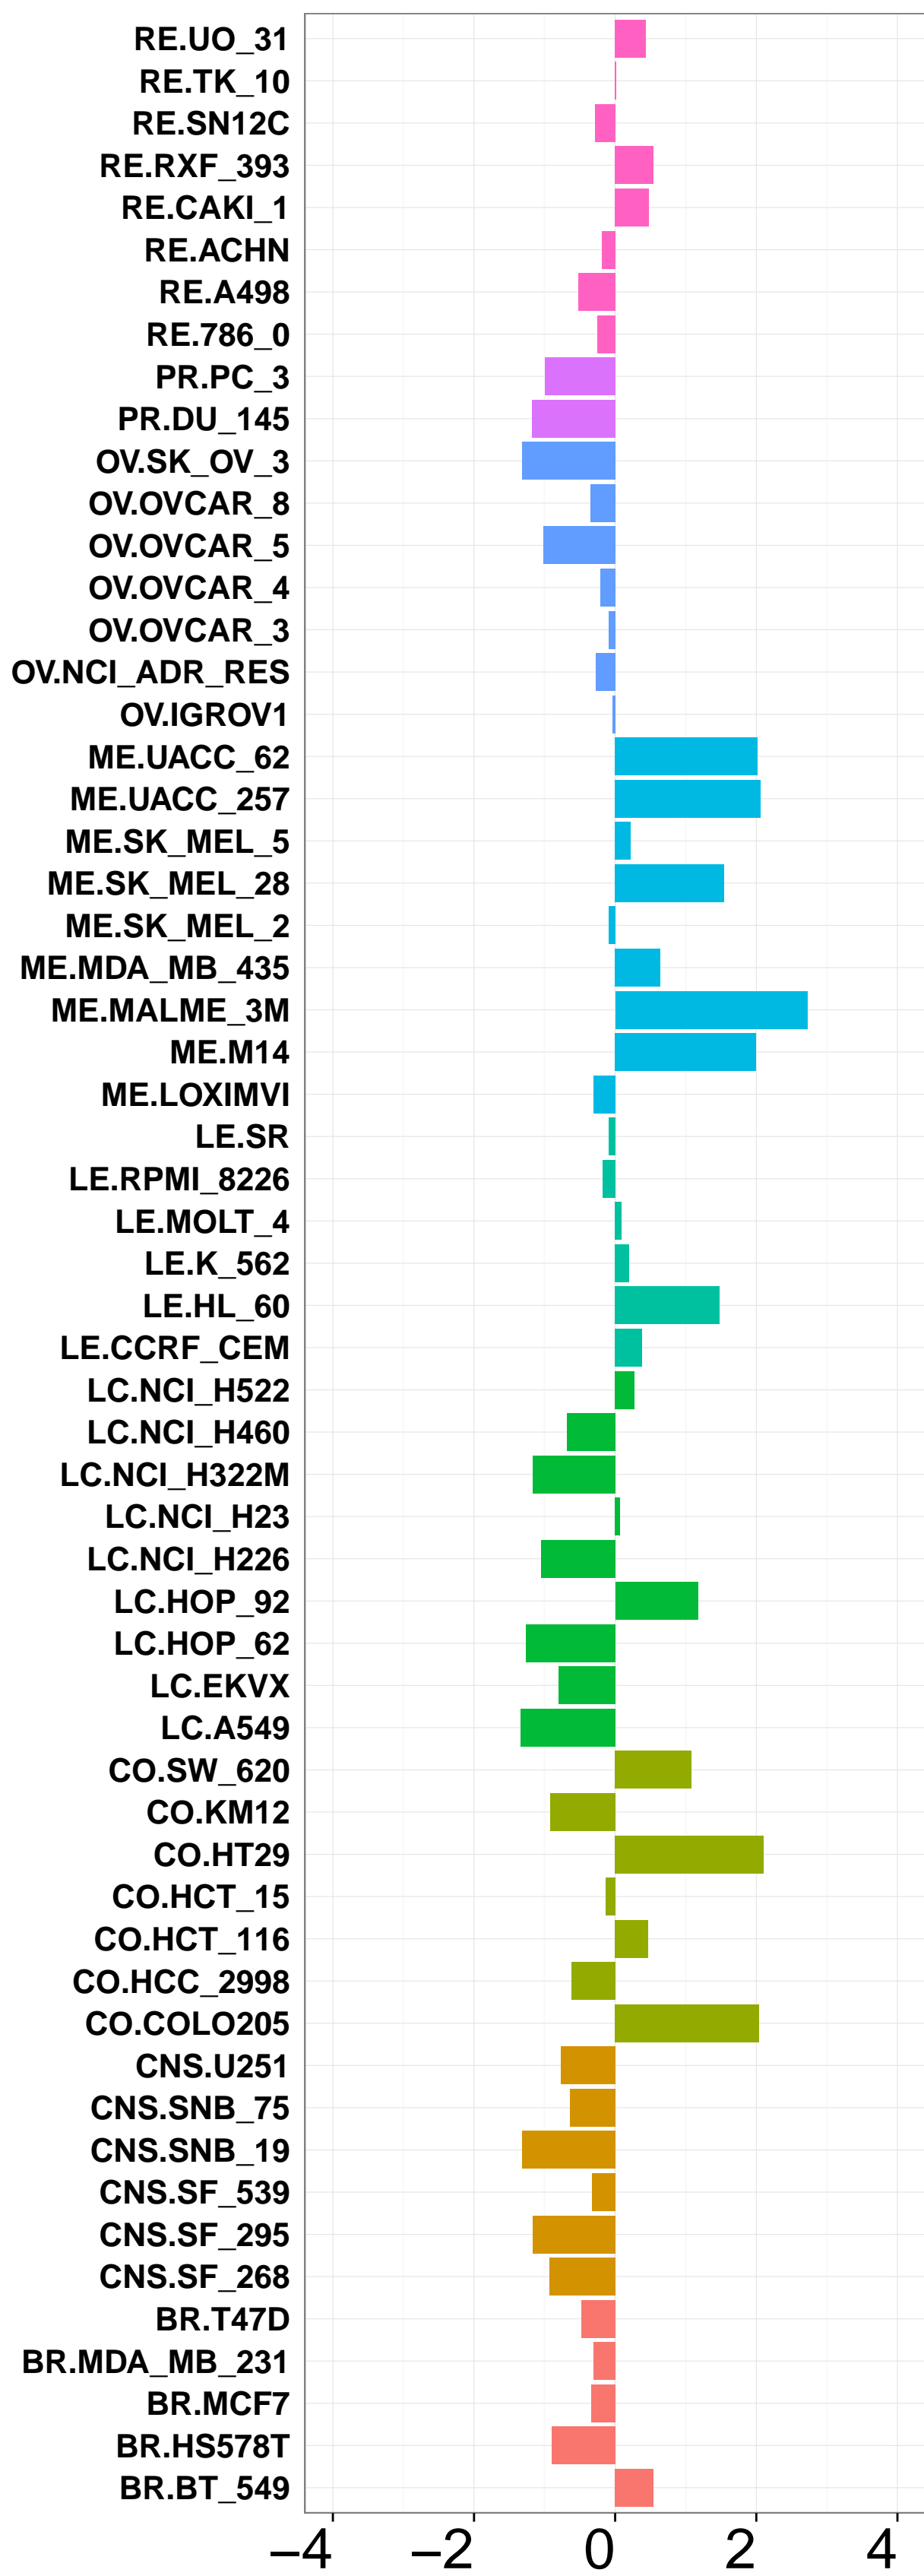

Observed (Z-scores)

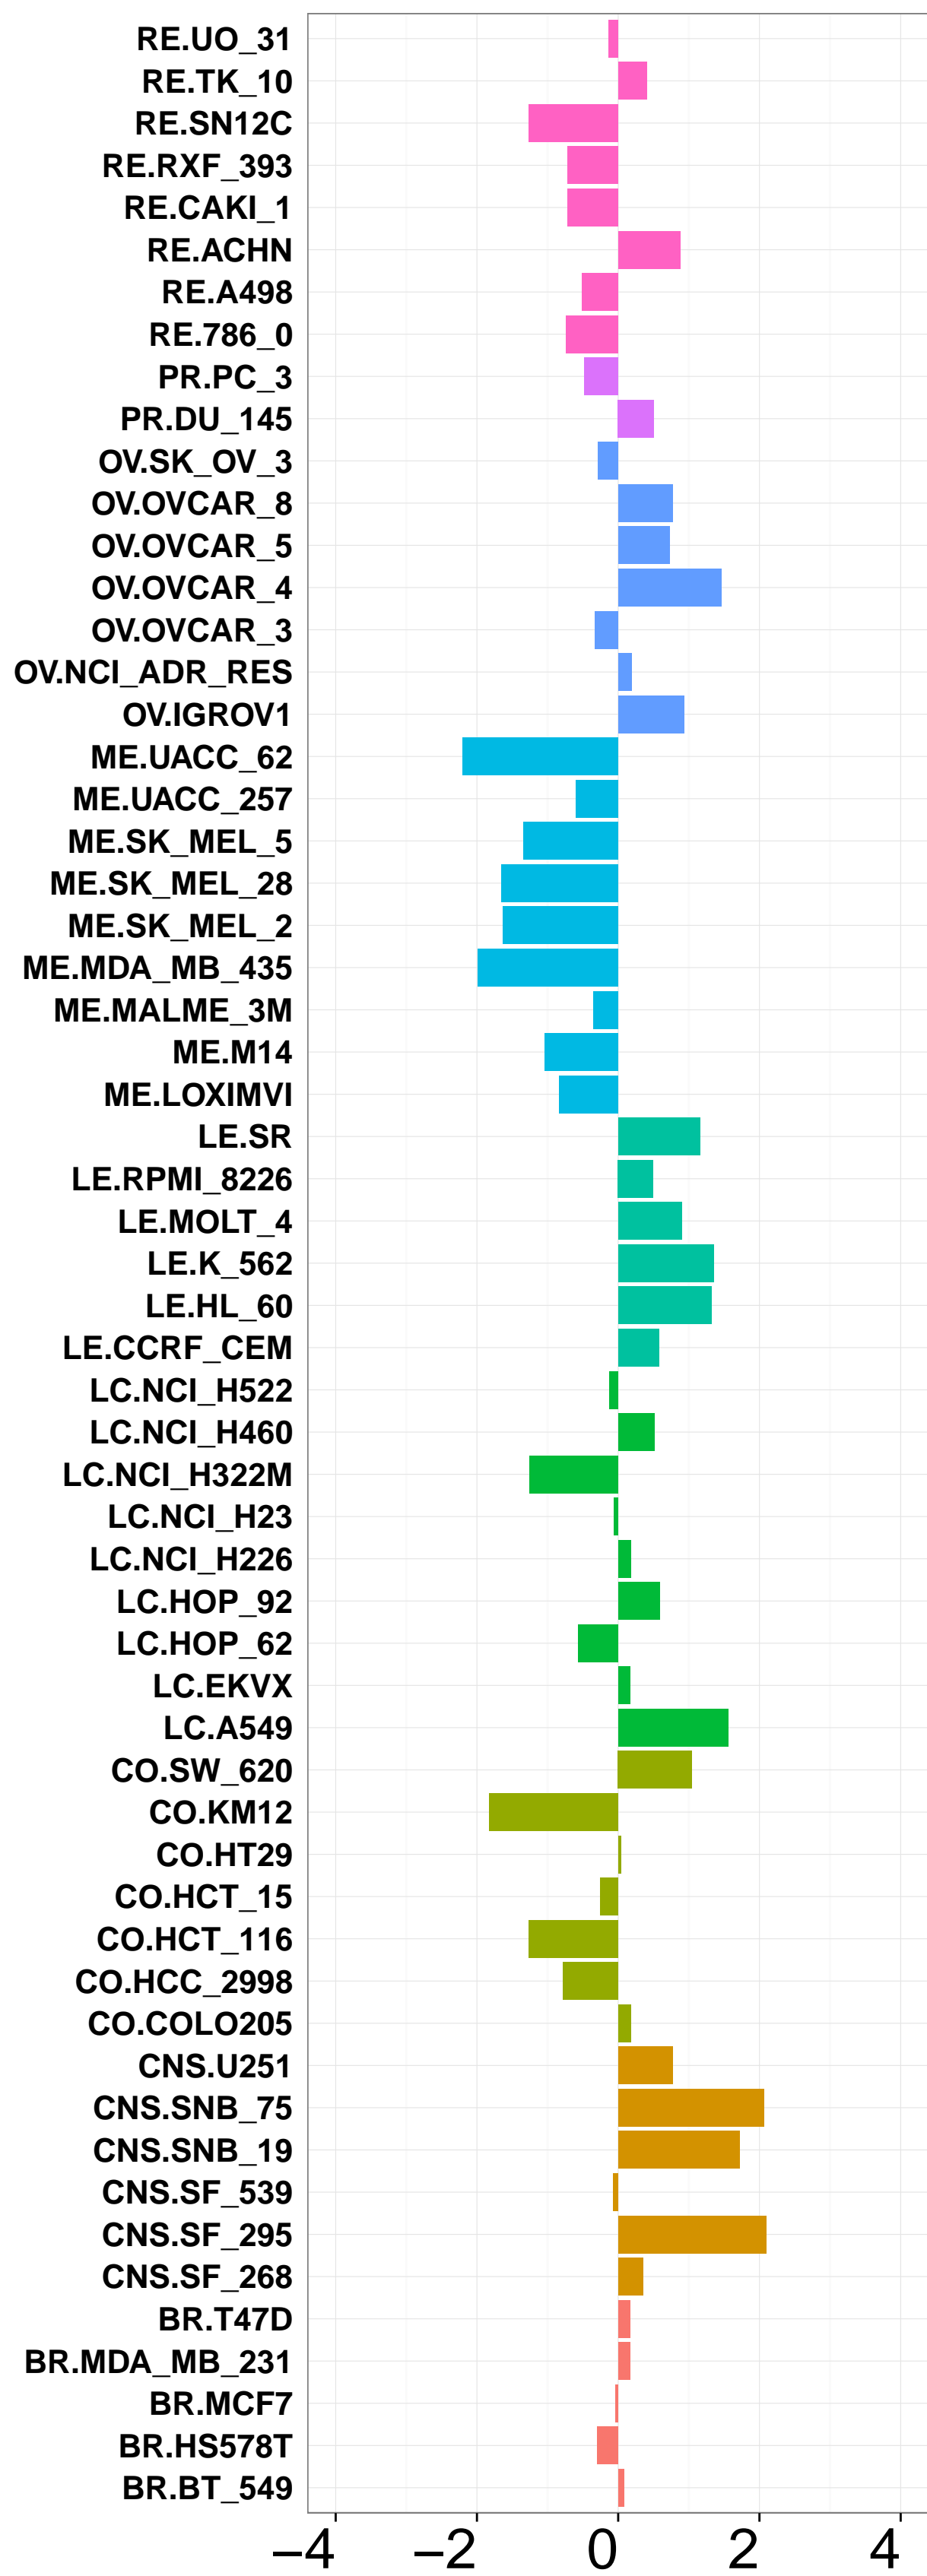

Predicted (Z-scores)

# NSC 376128, Dolastatin\_10 (LOTO)

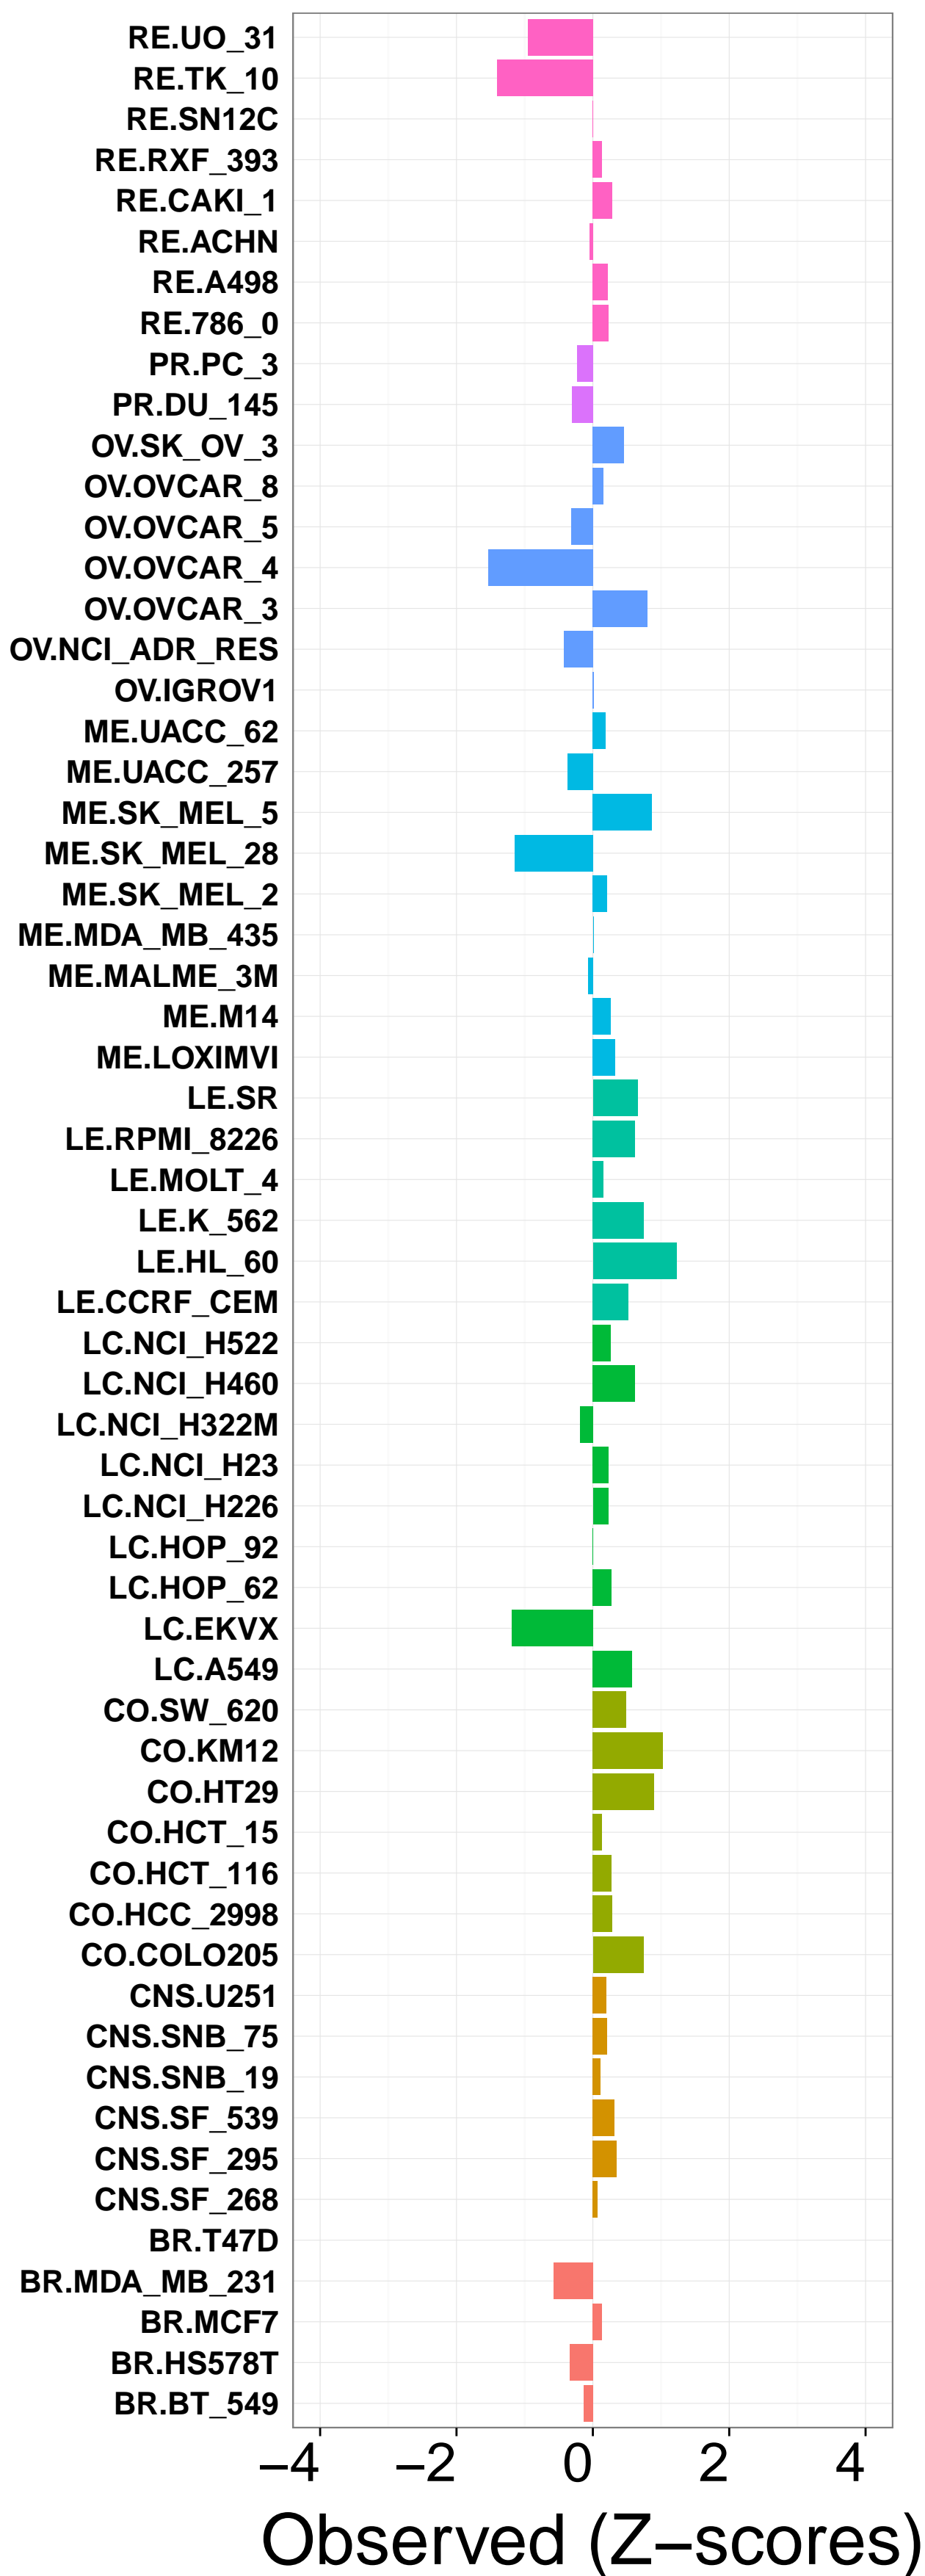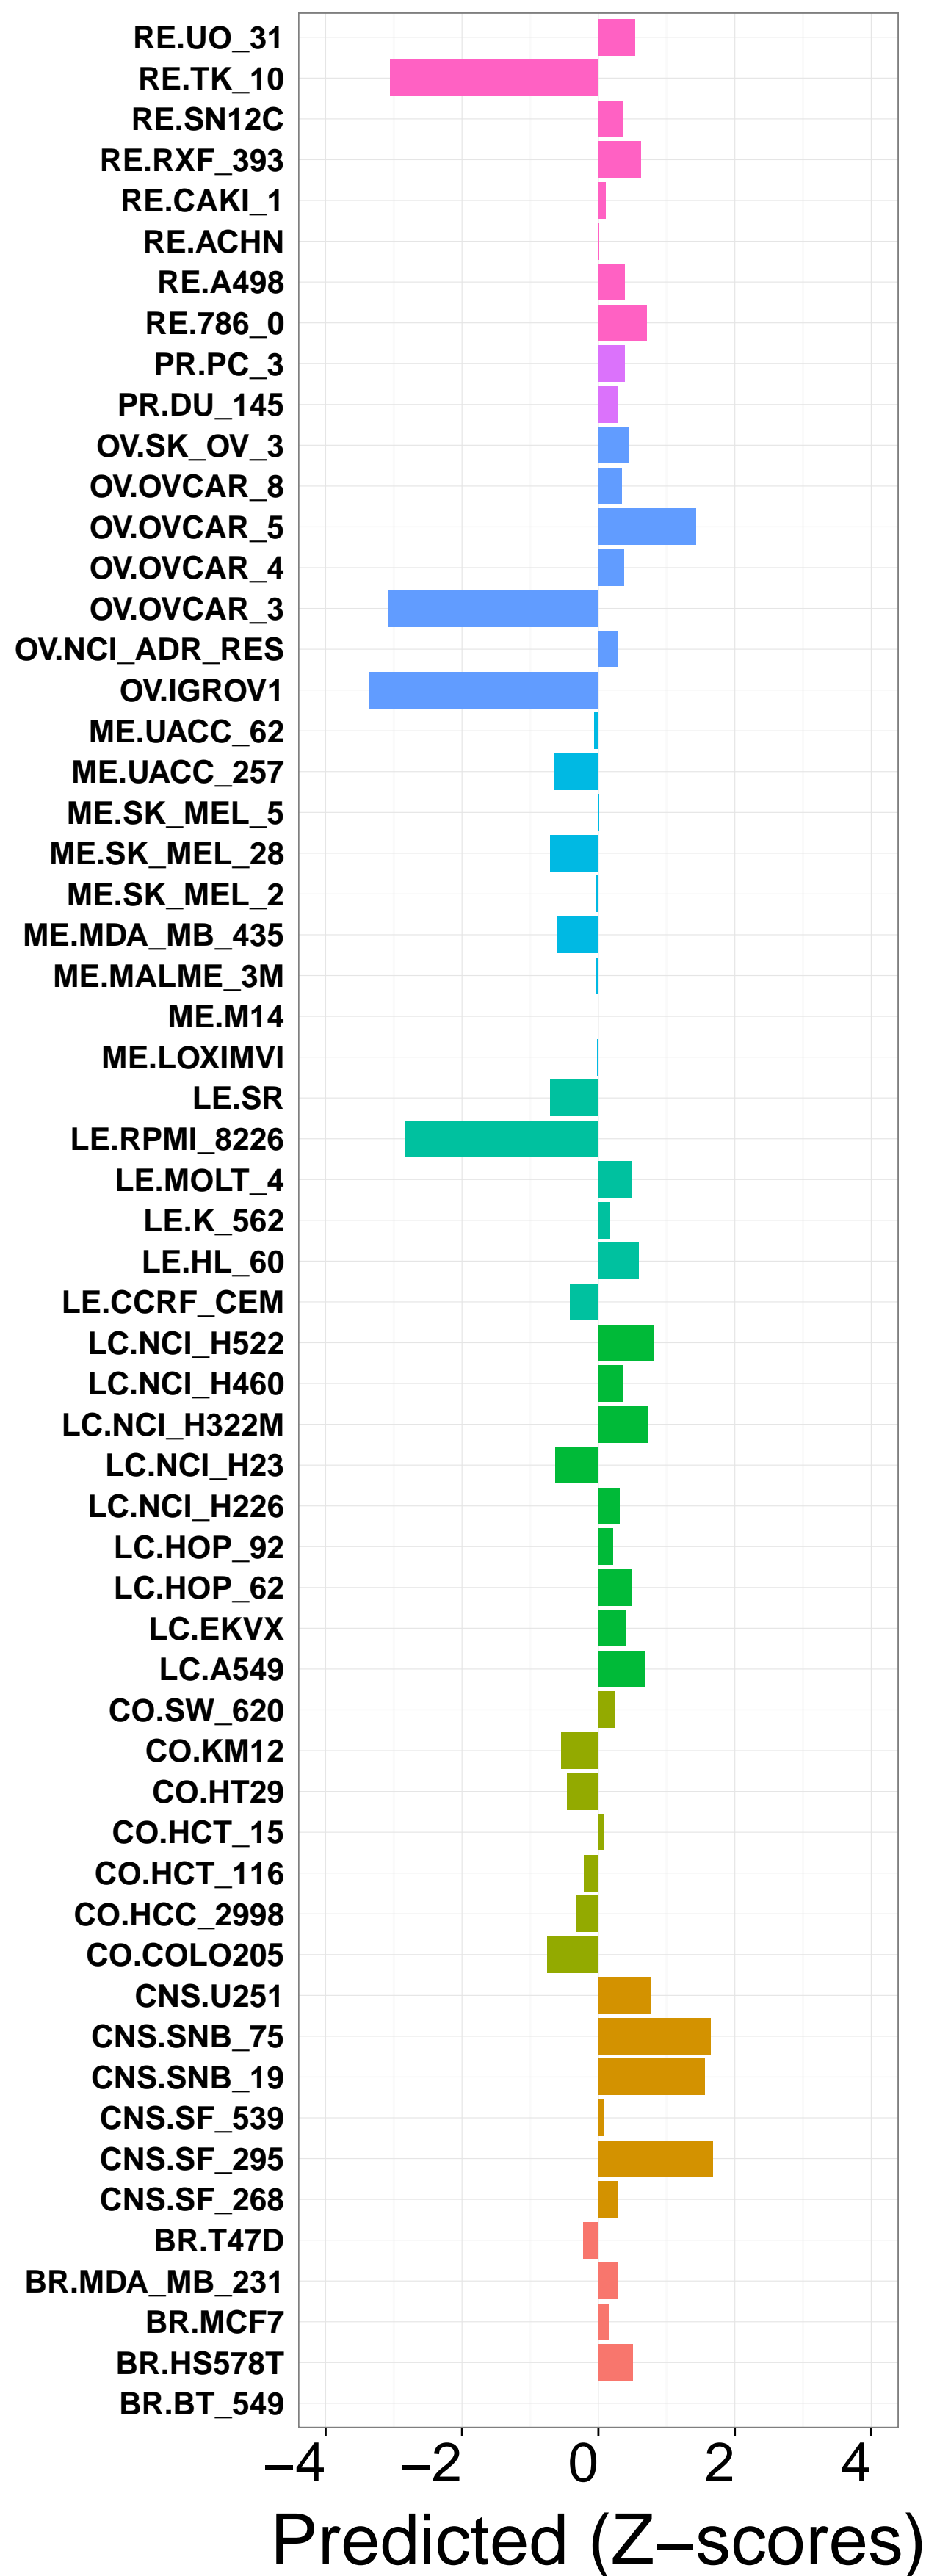

# NSC 606869, (LOTO)

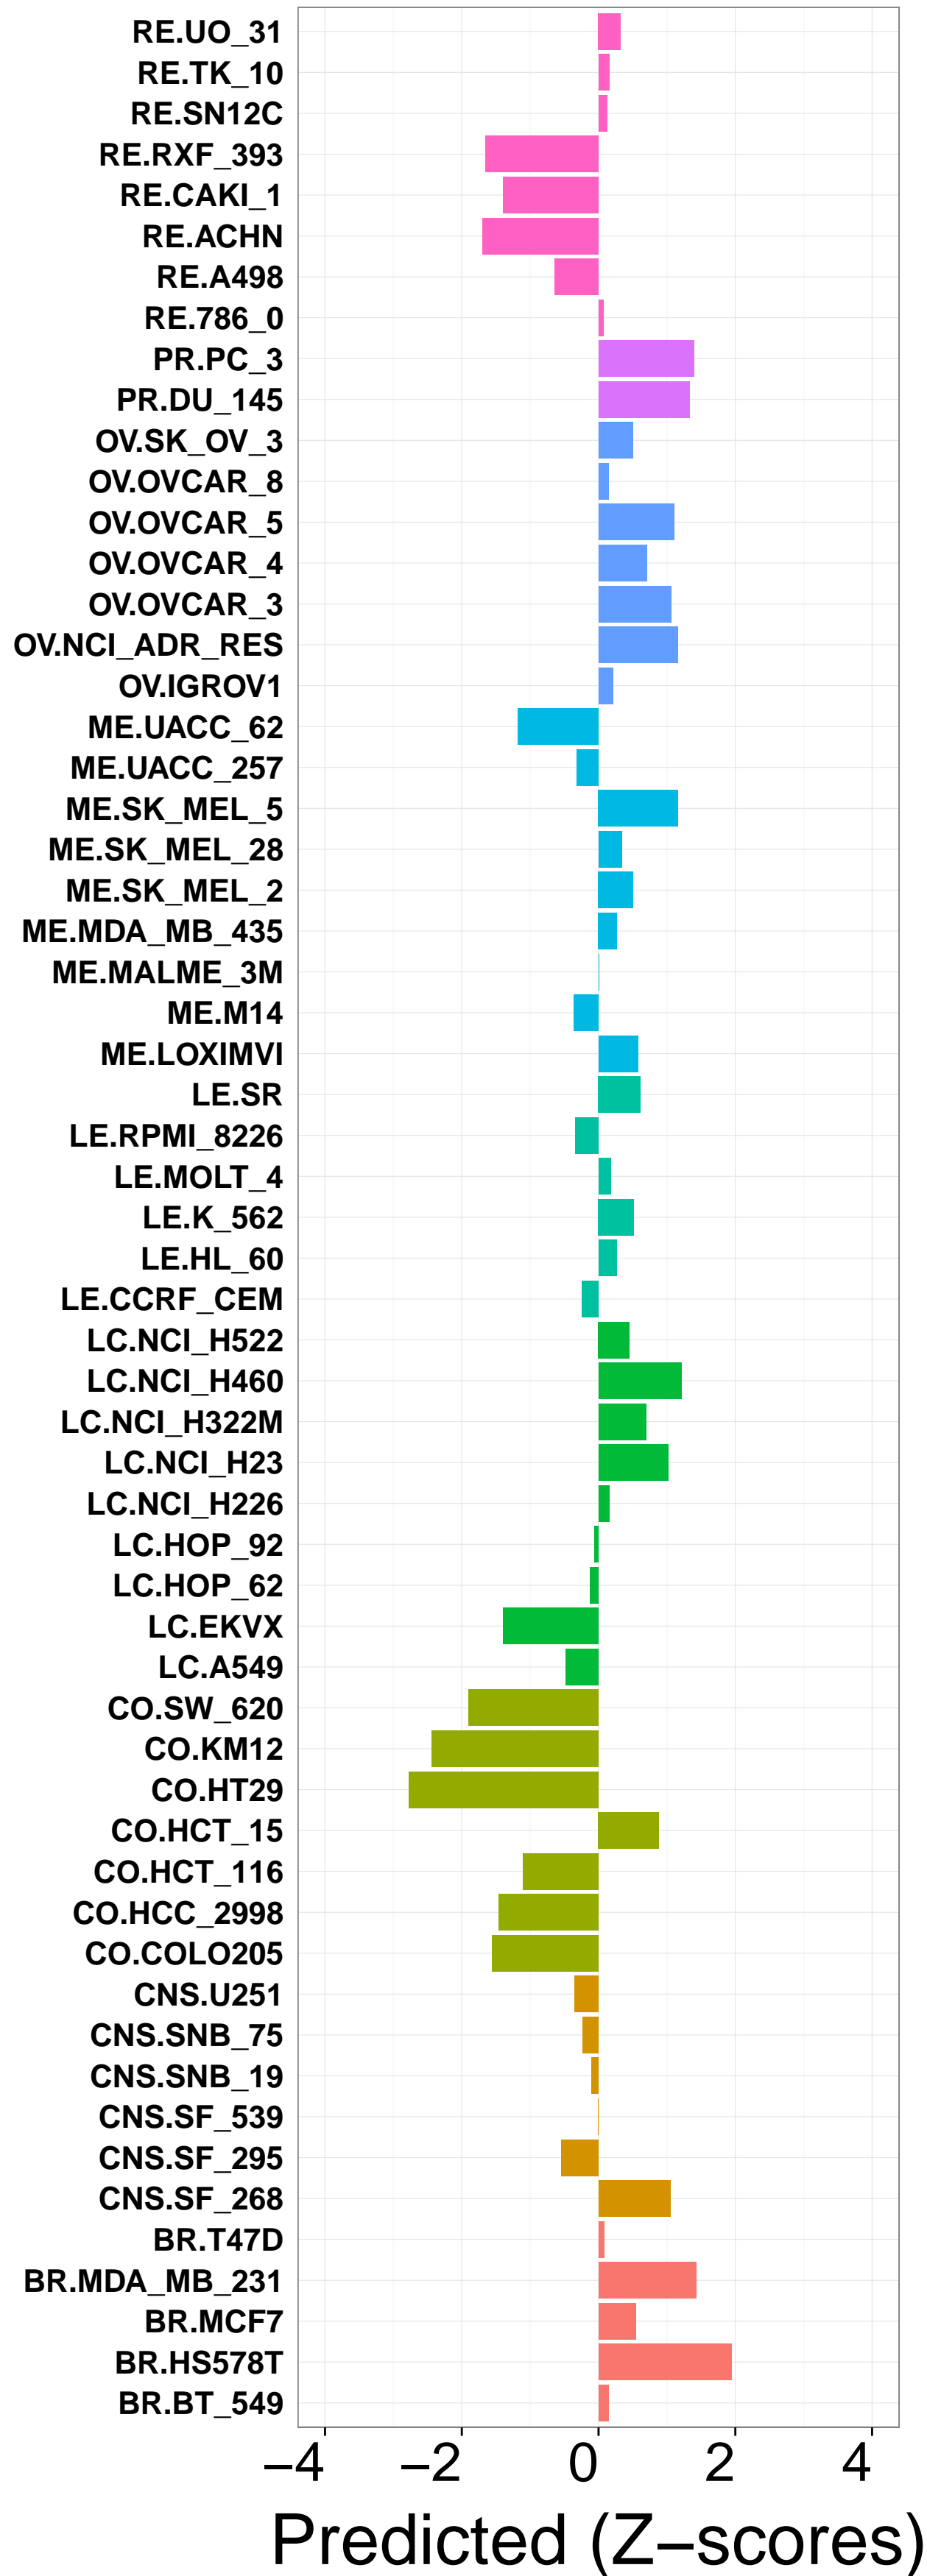

# NSC 609699, Topotecan\_Hydrochloride (LOTO)

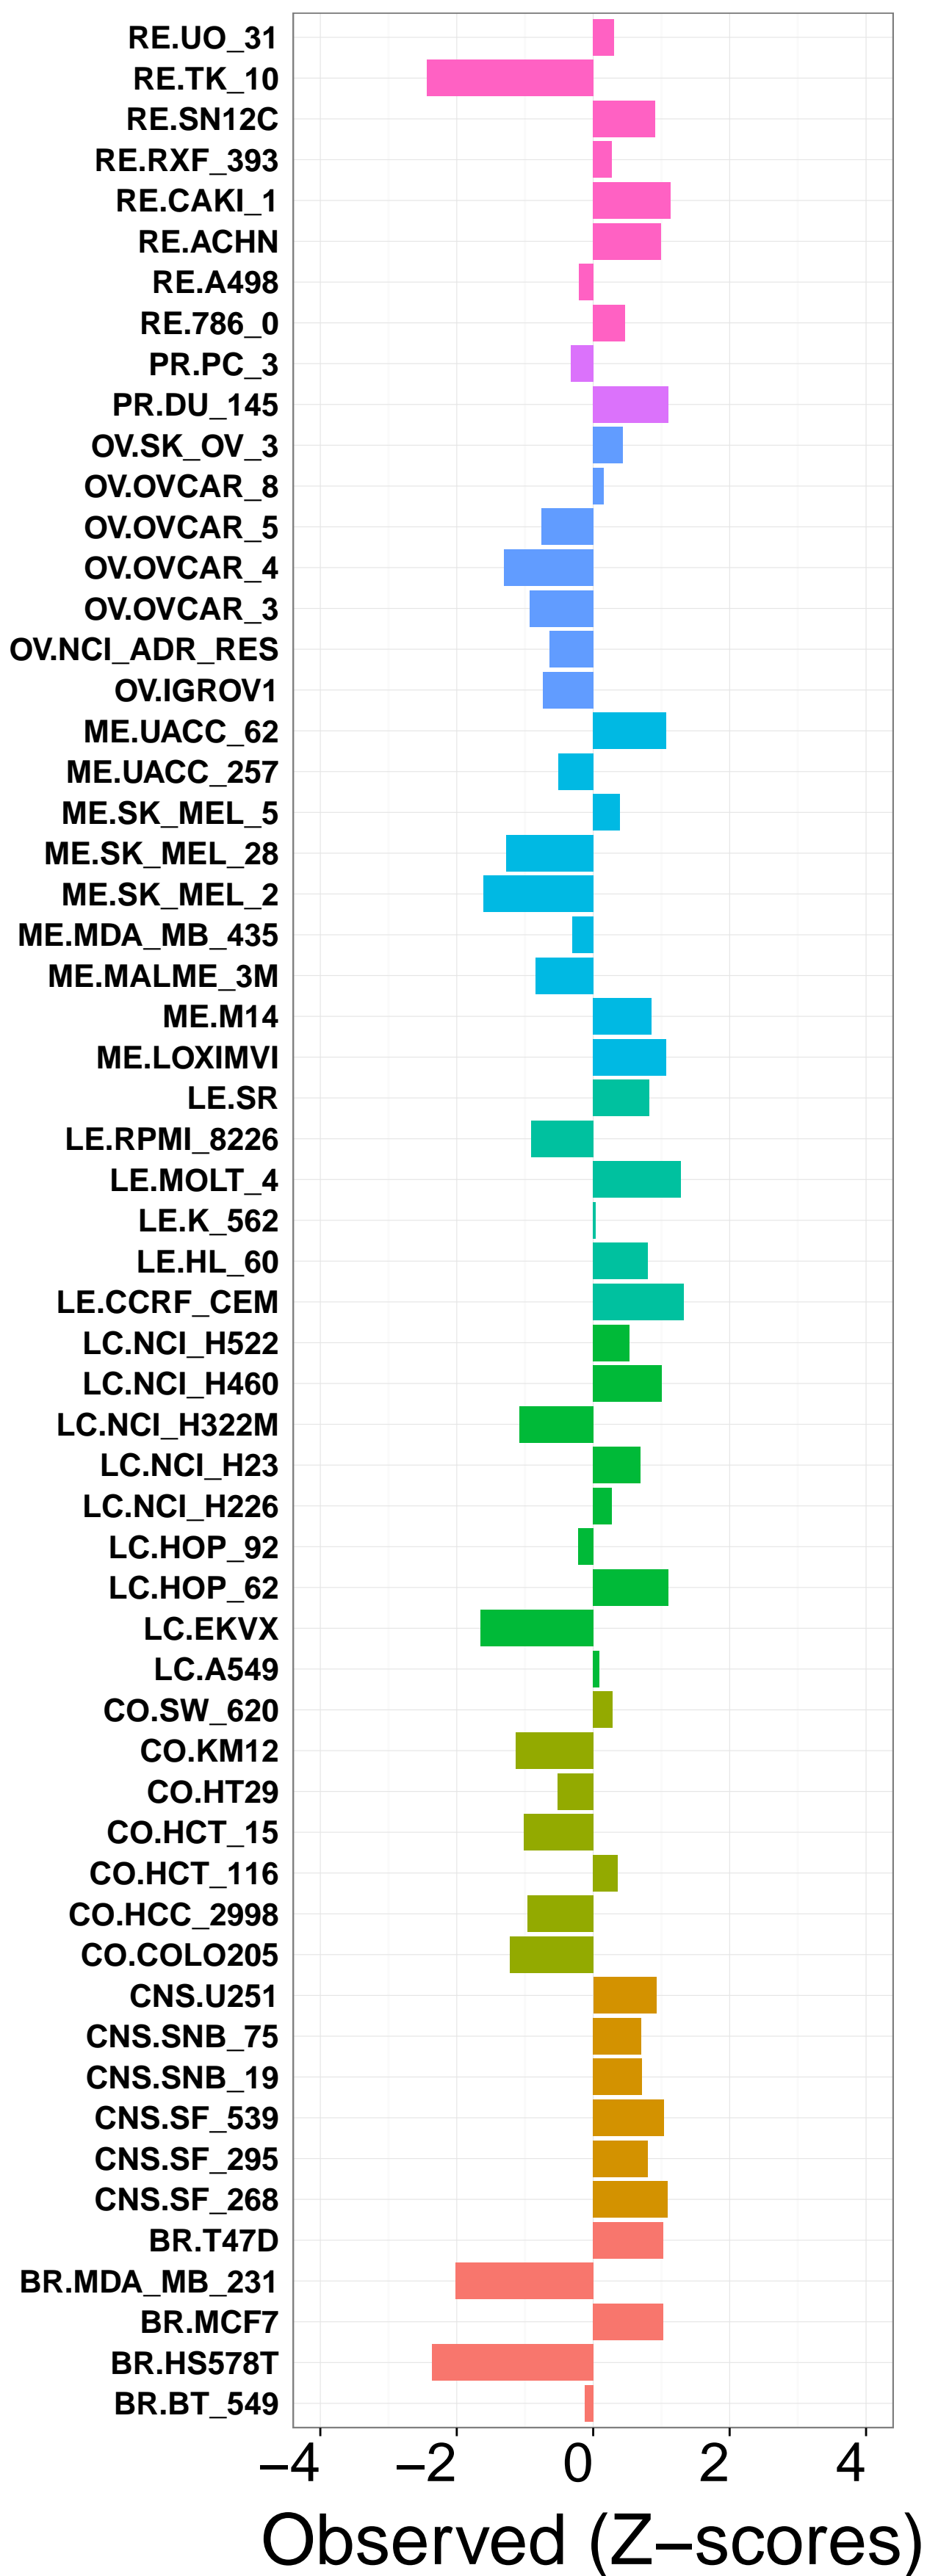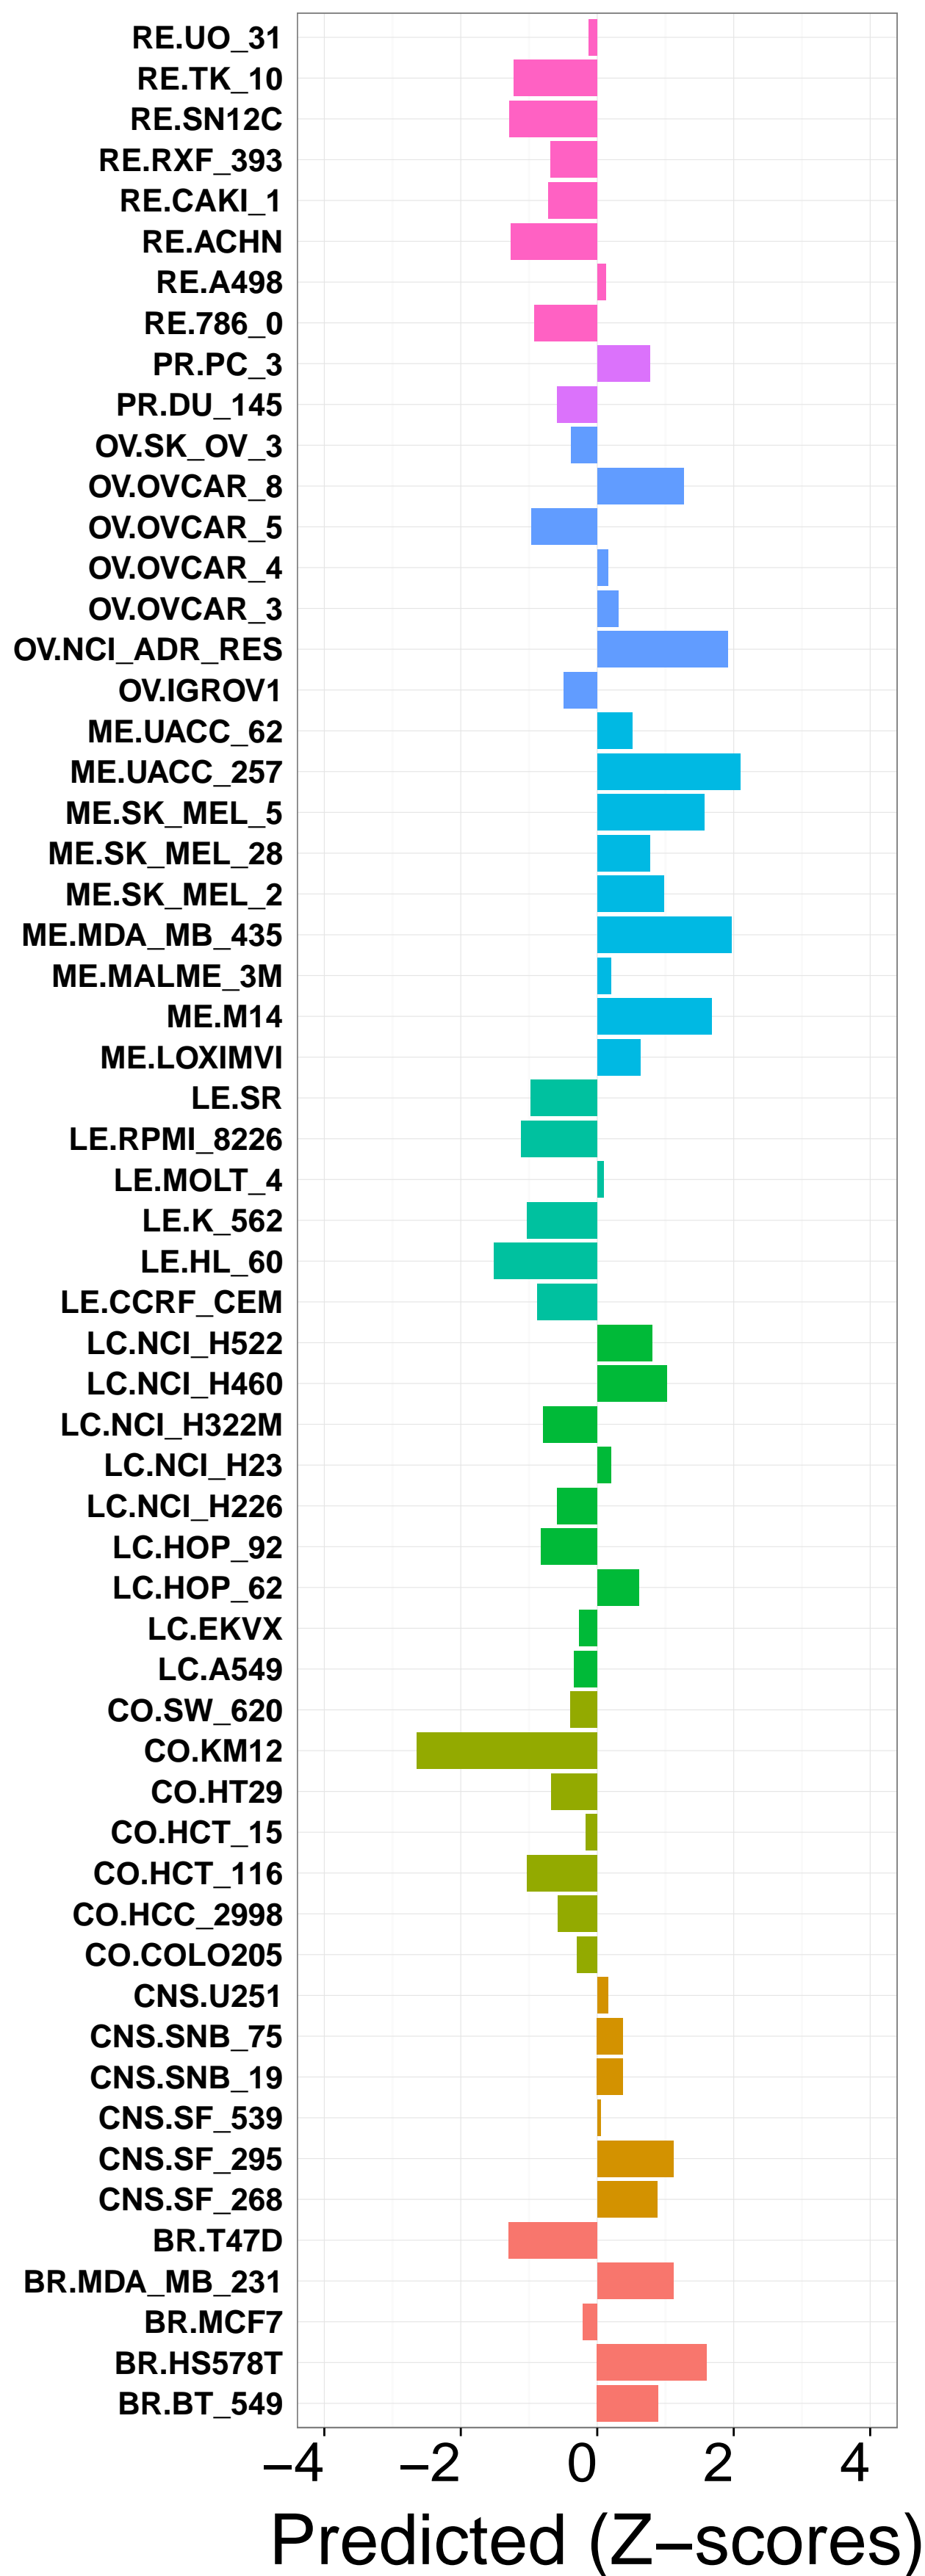

# NSC 613327, (LOTO)

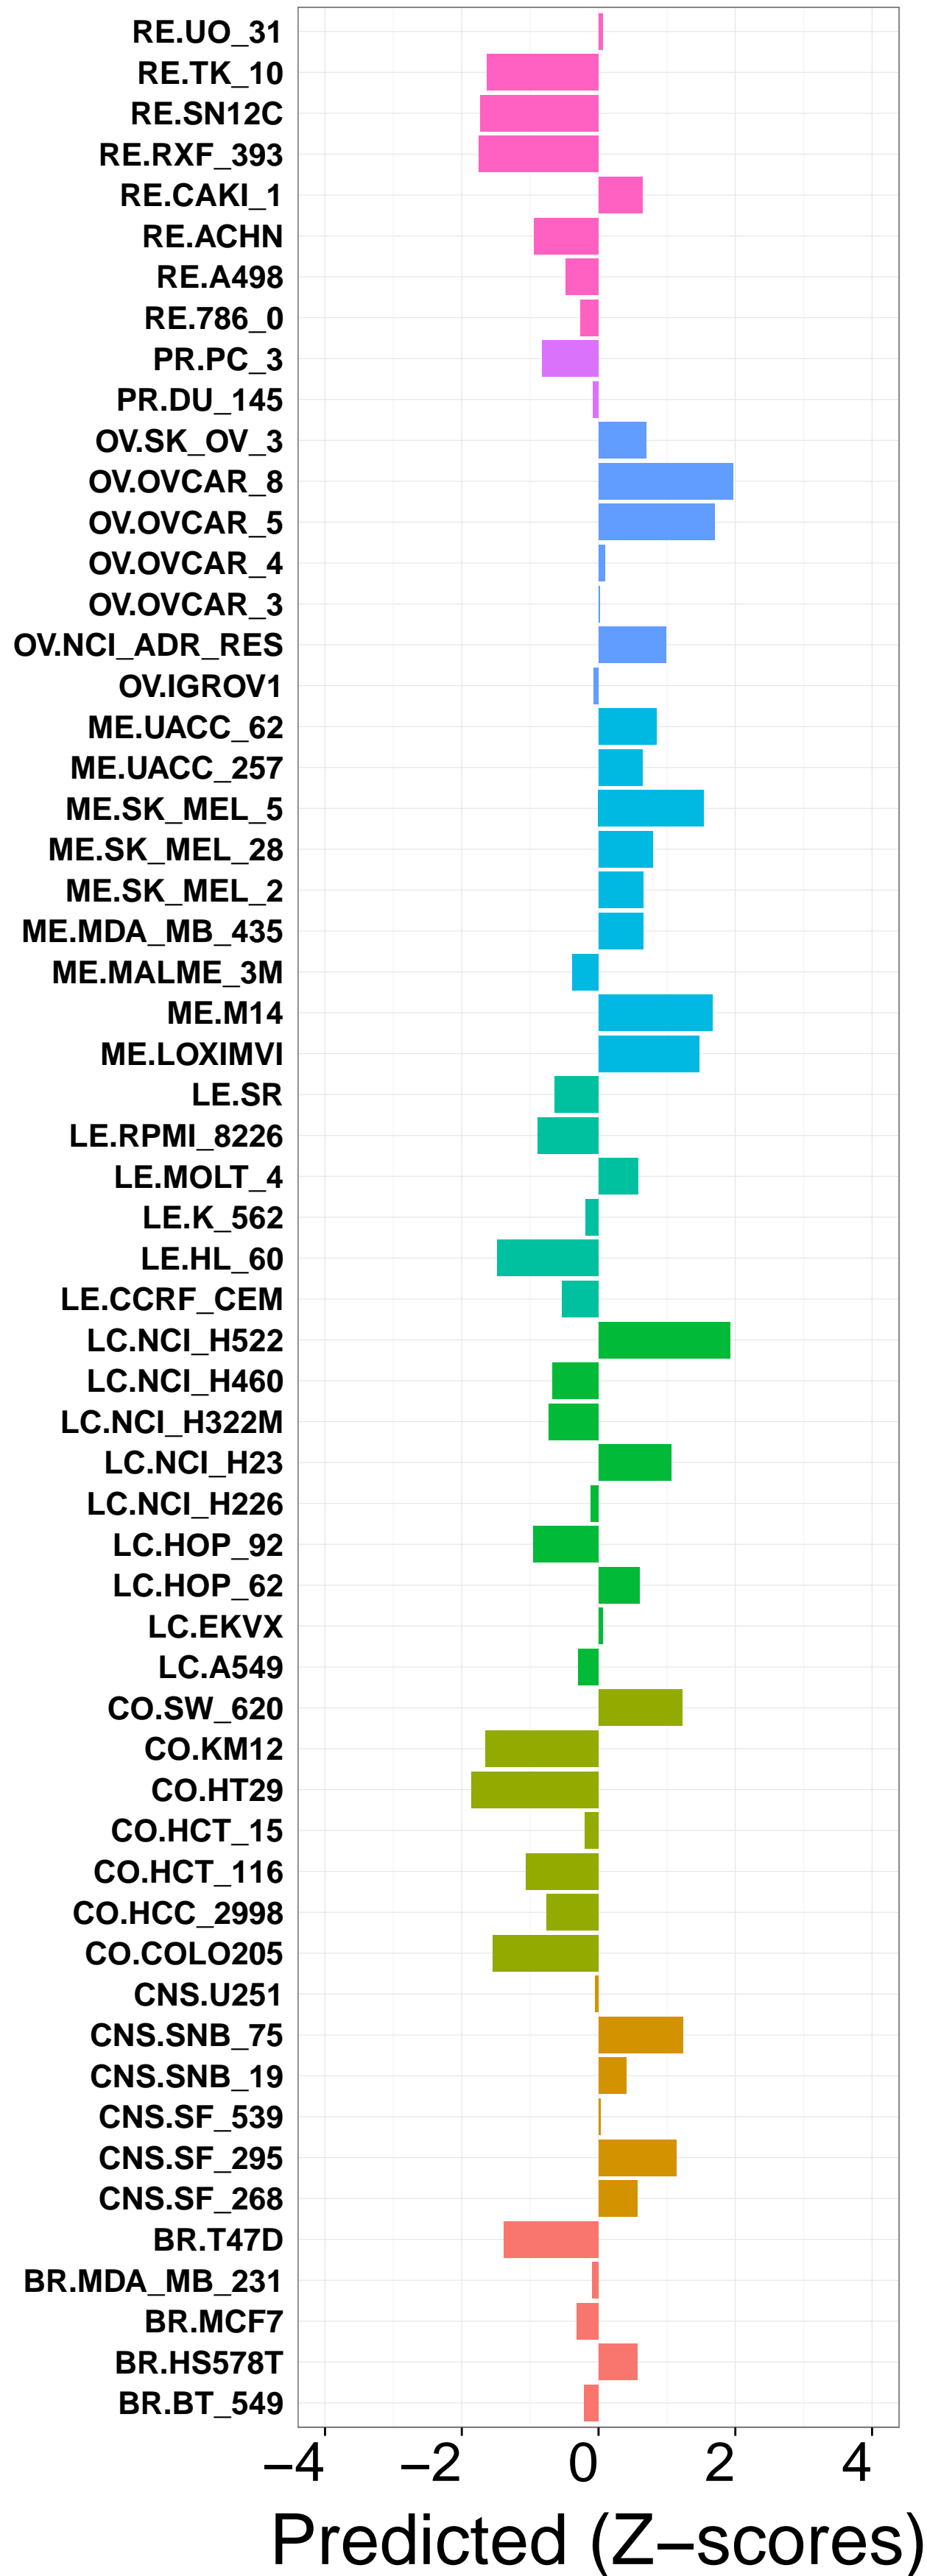



# NSC 628503, Docetaxel (LOTO)

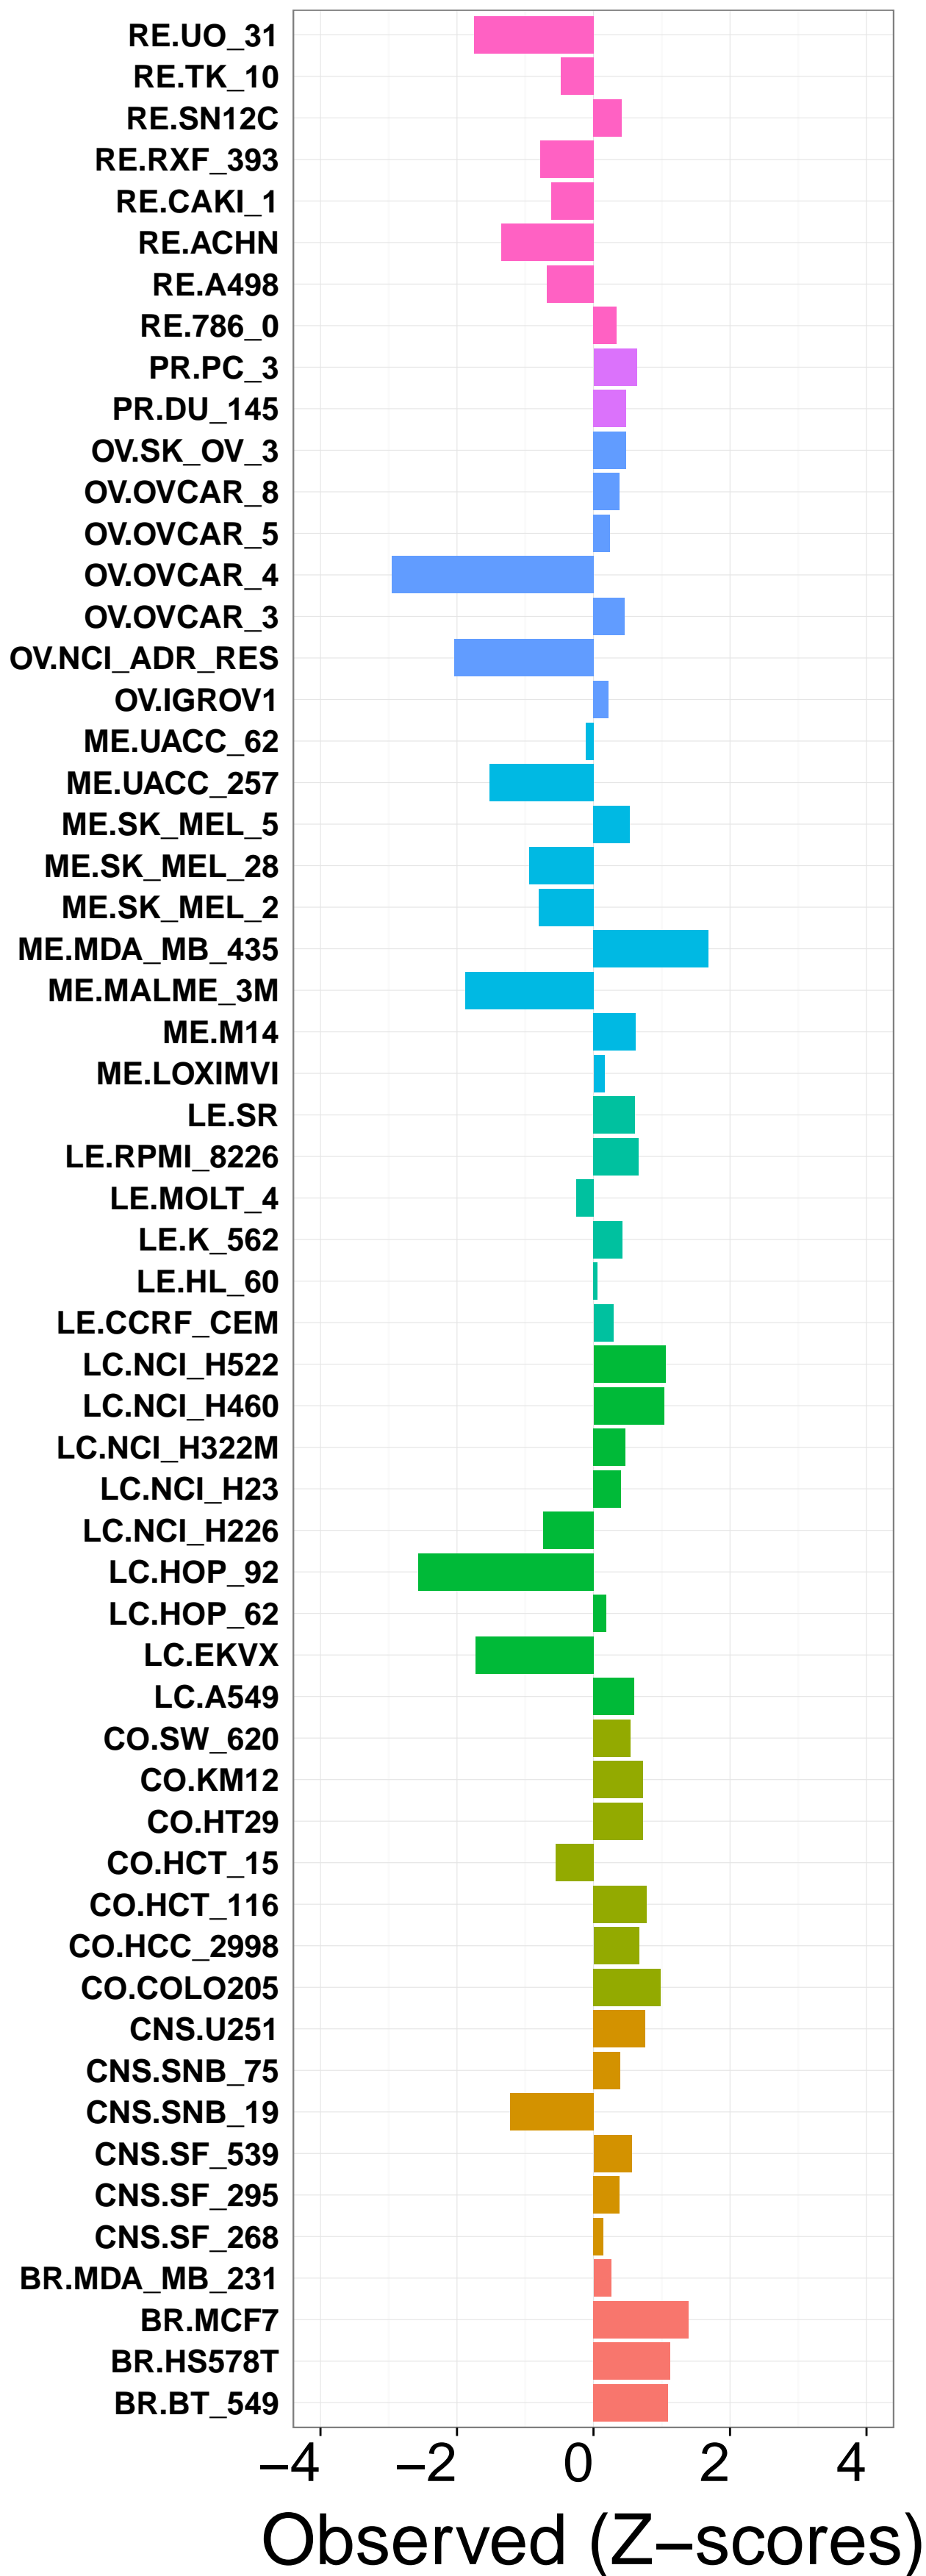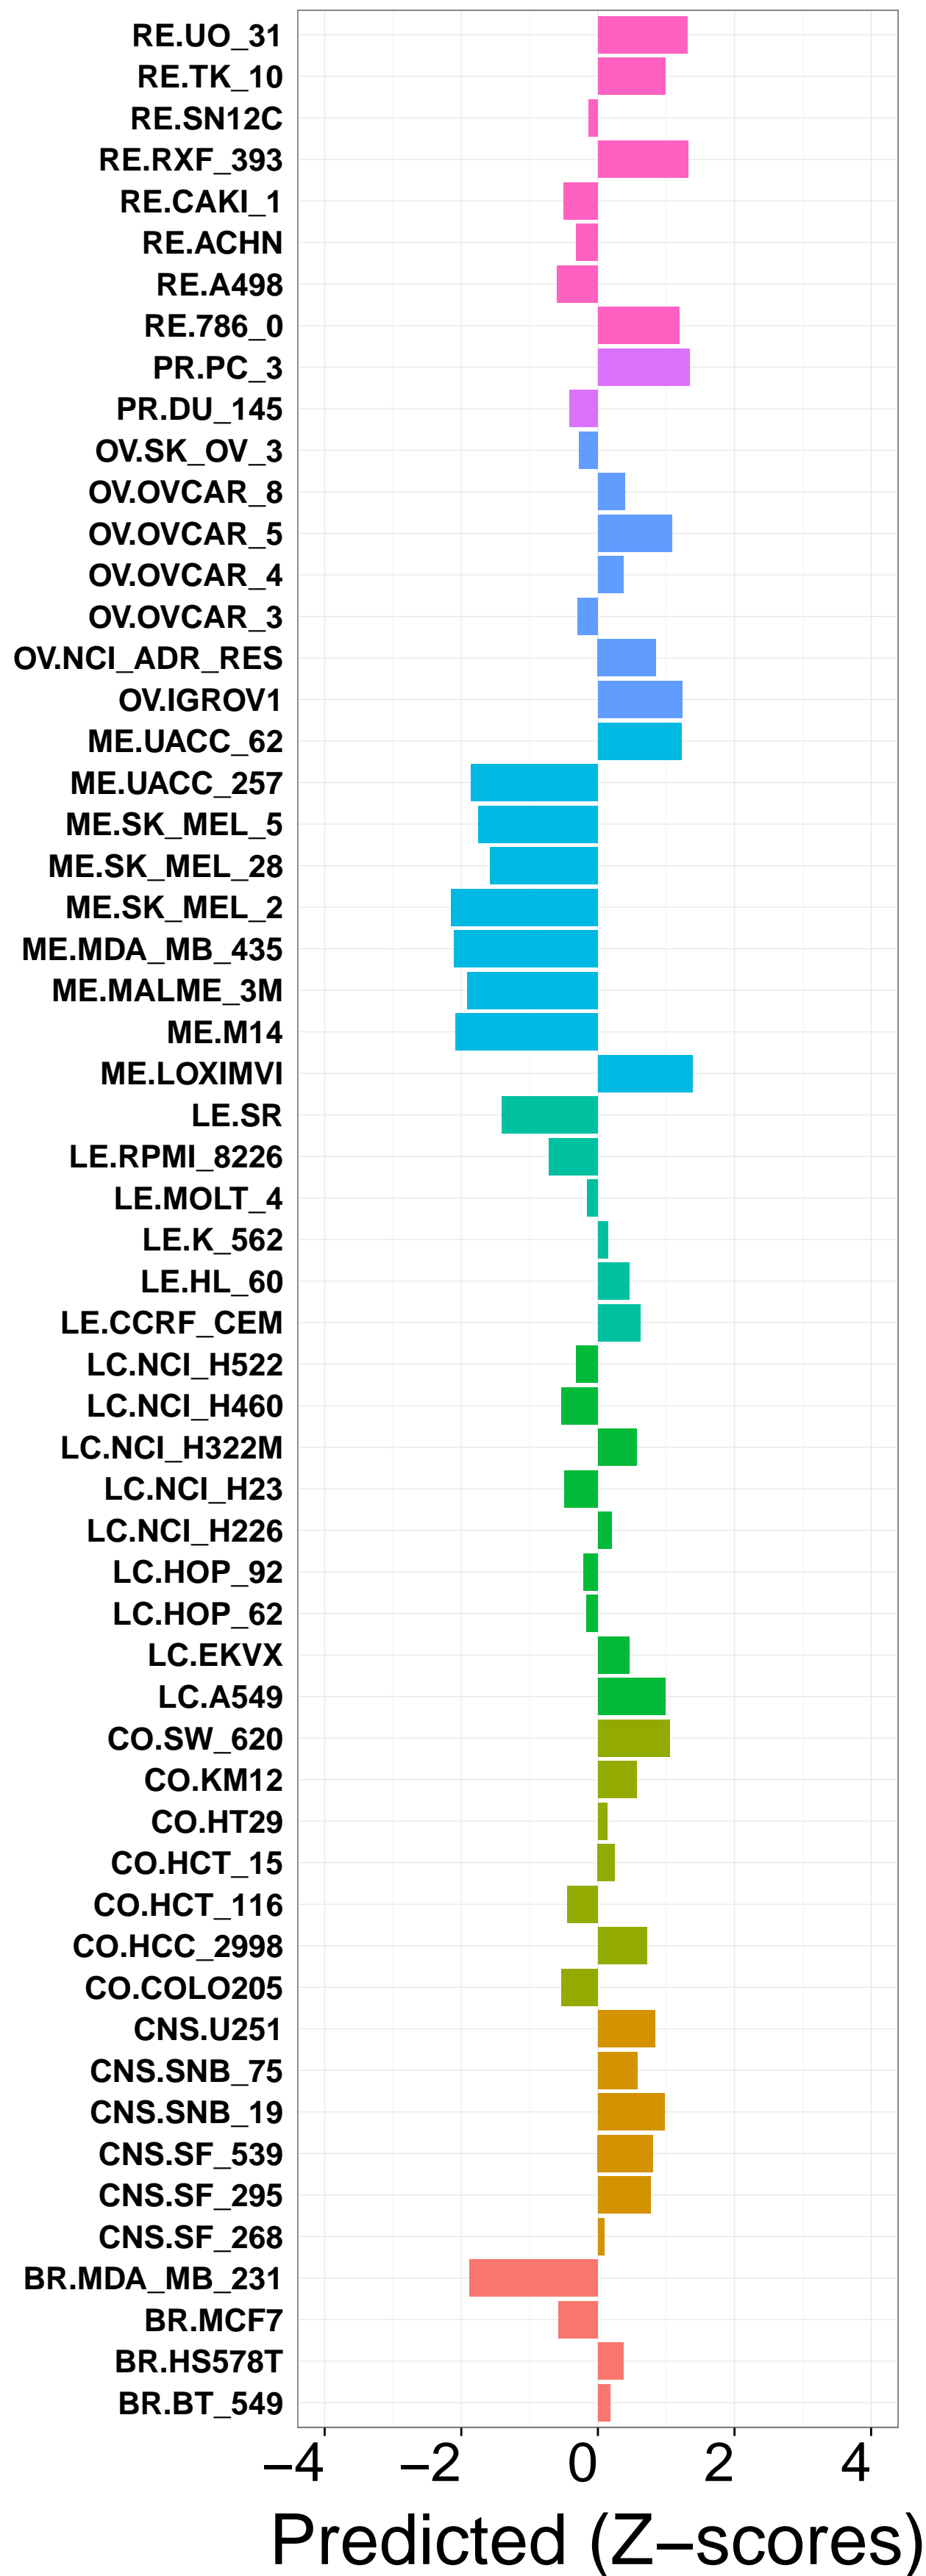

# NSC 630176, Romidepsin (LOTO)

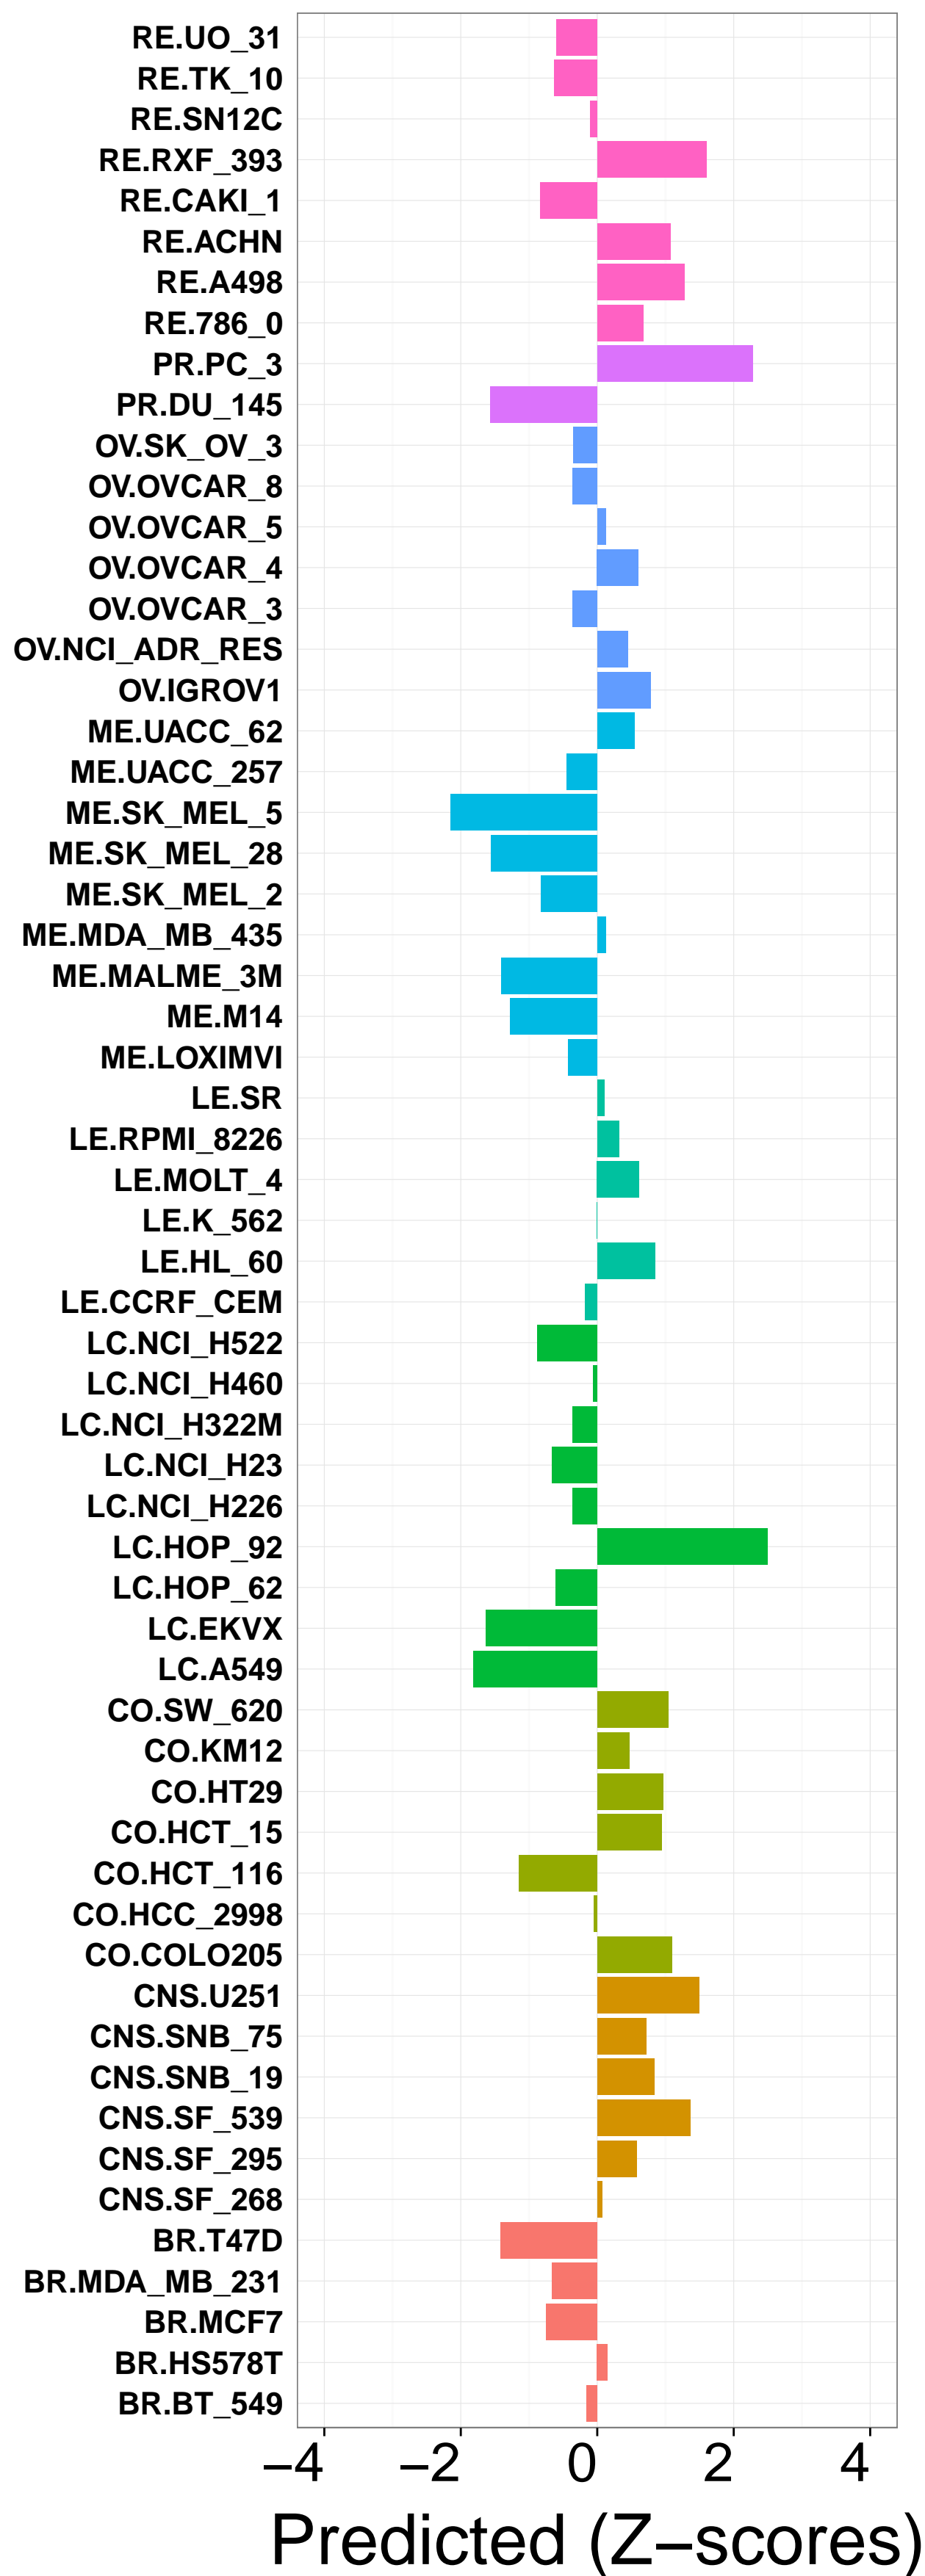

# NSC 633782, (LOTO)

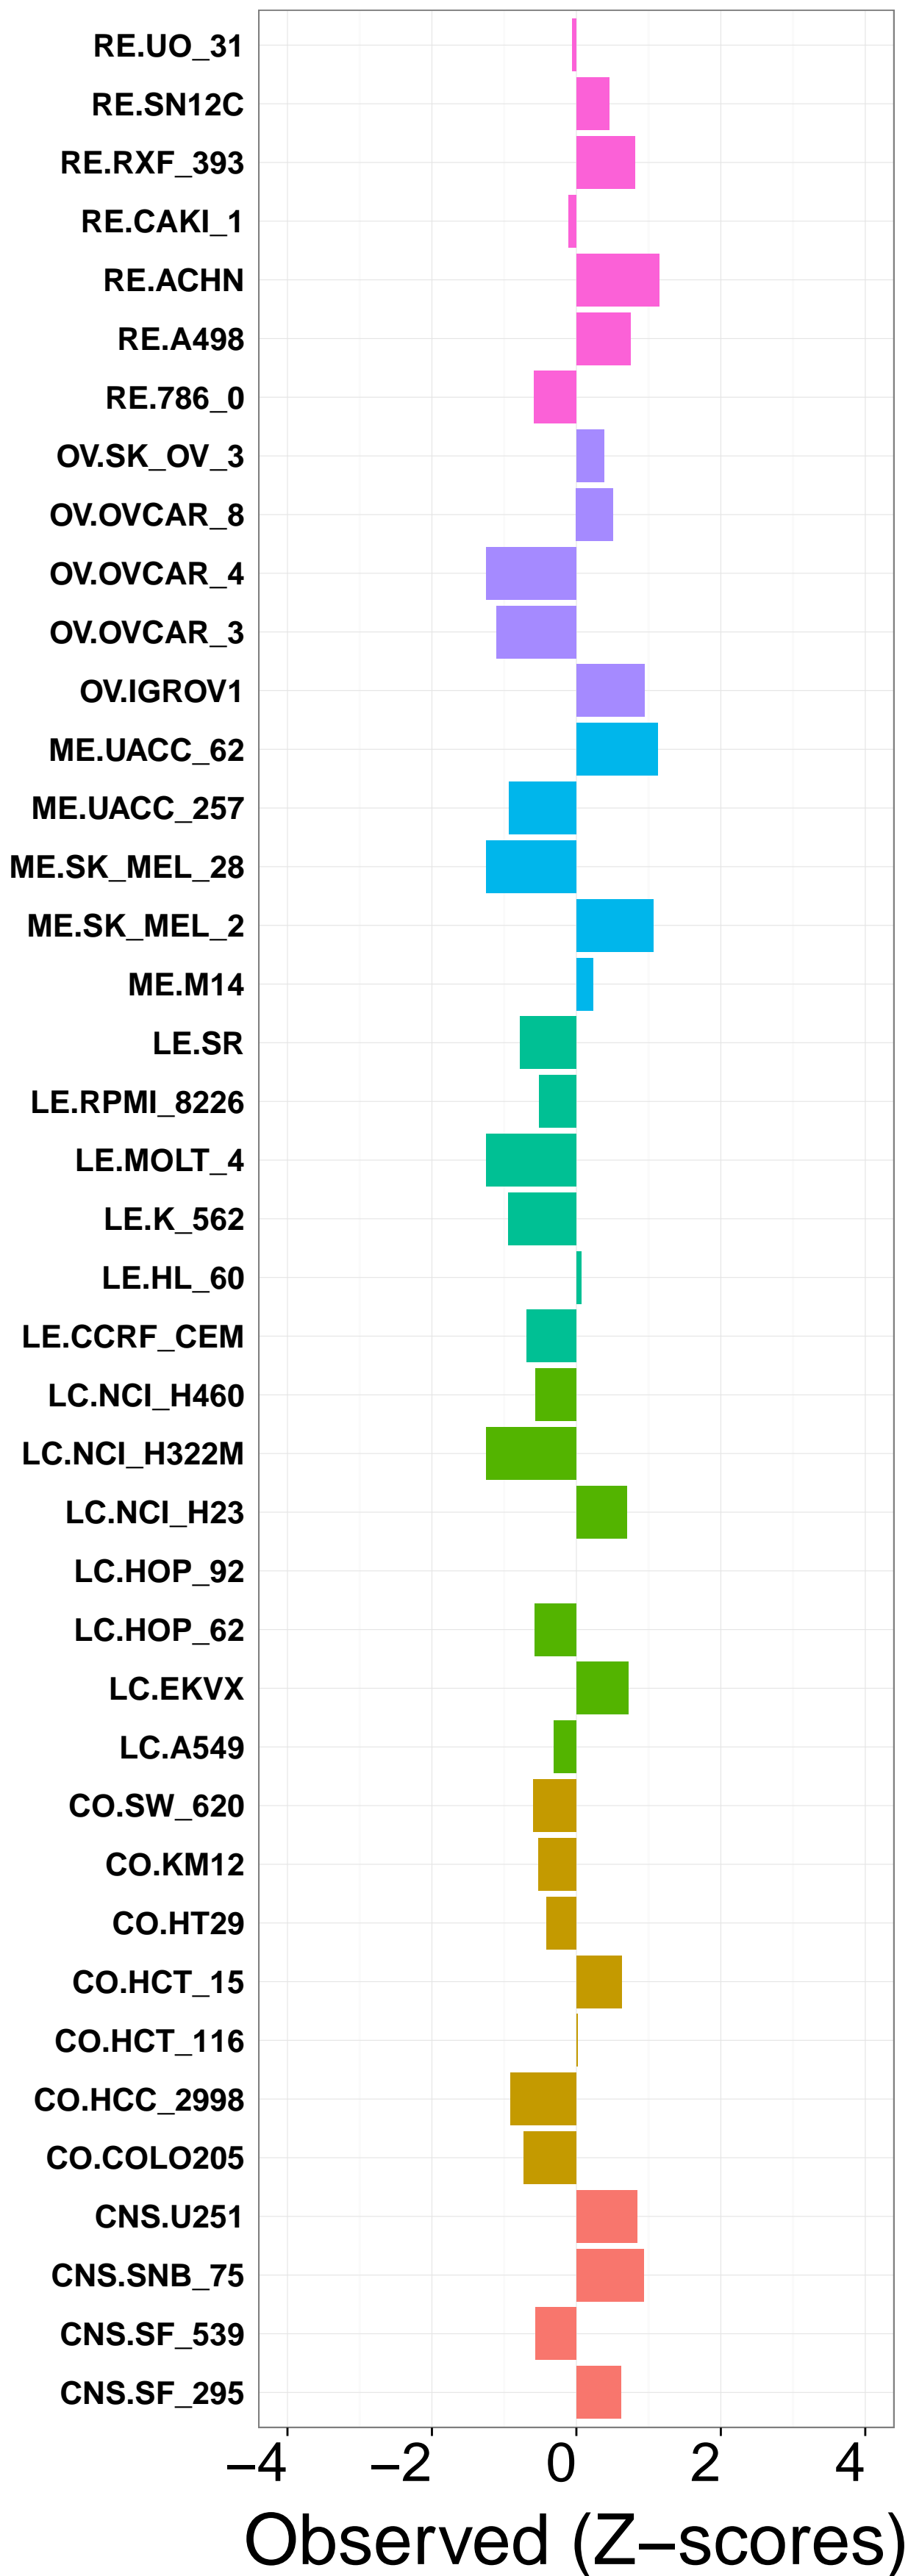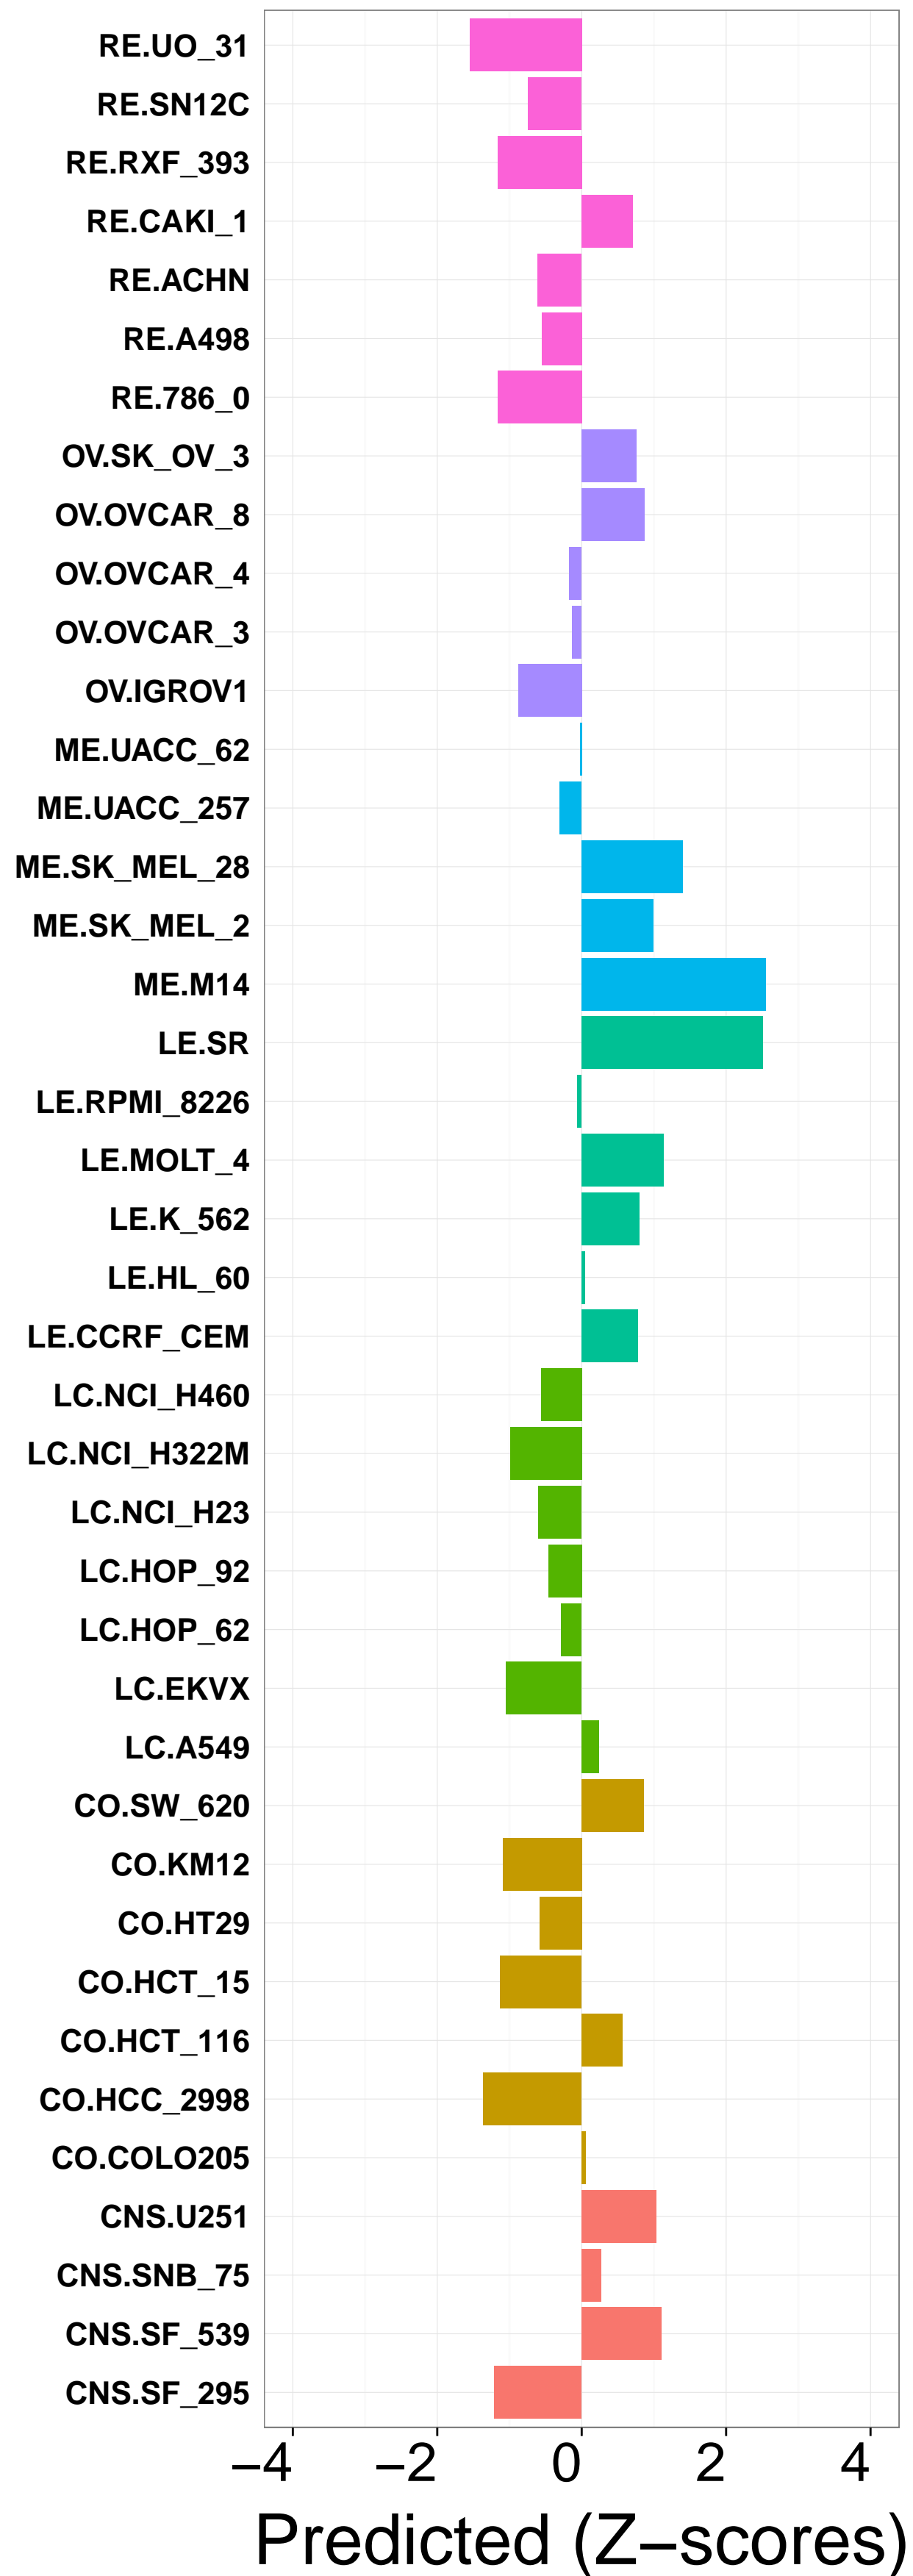

# NSC 63878, Cytarabine\_Hydrochloride (LOTO)

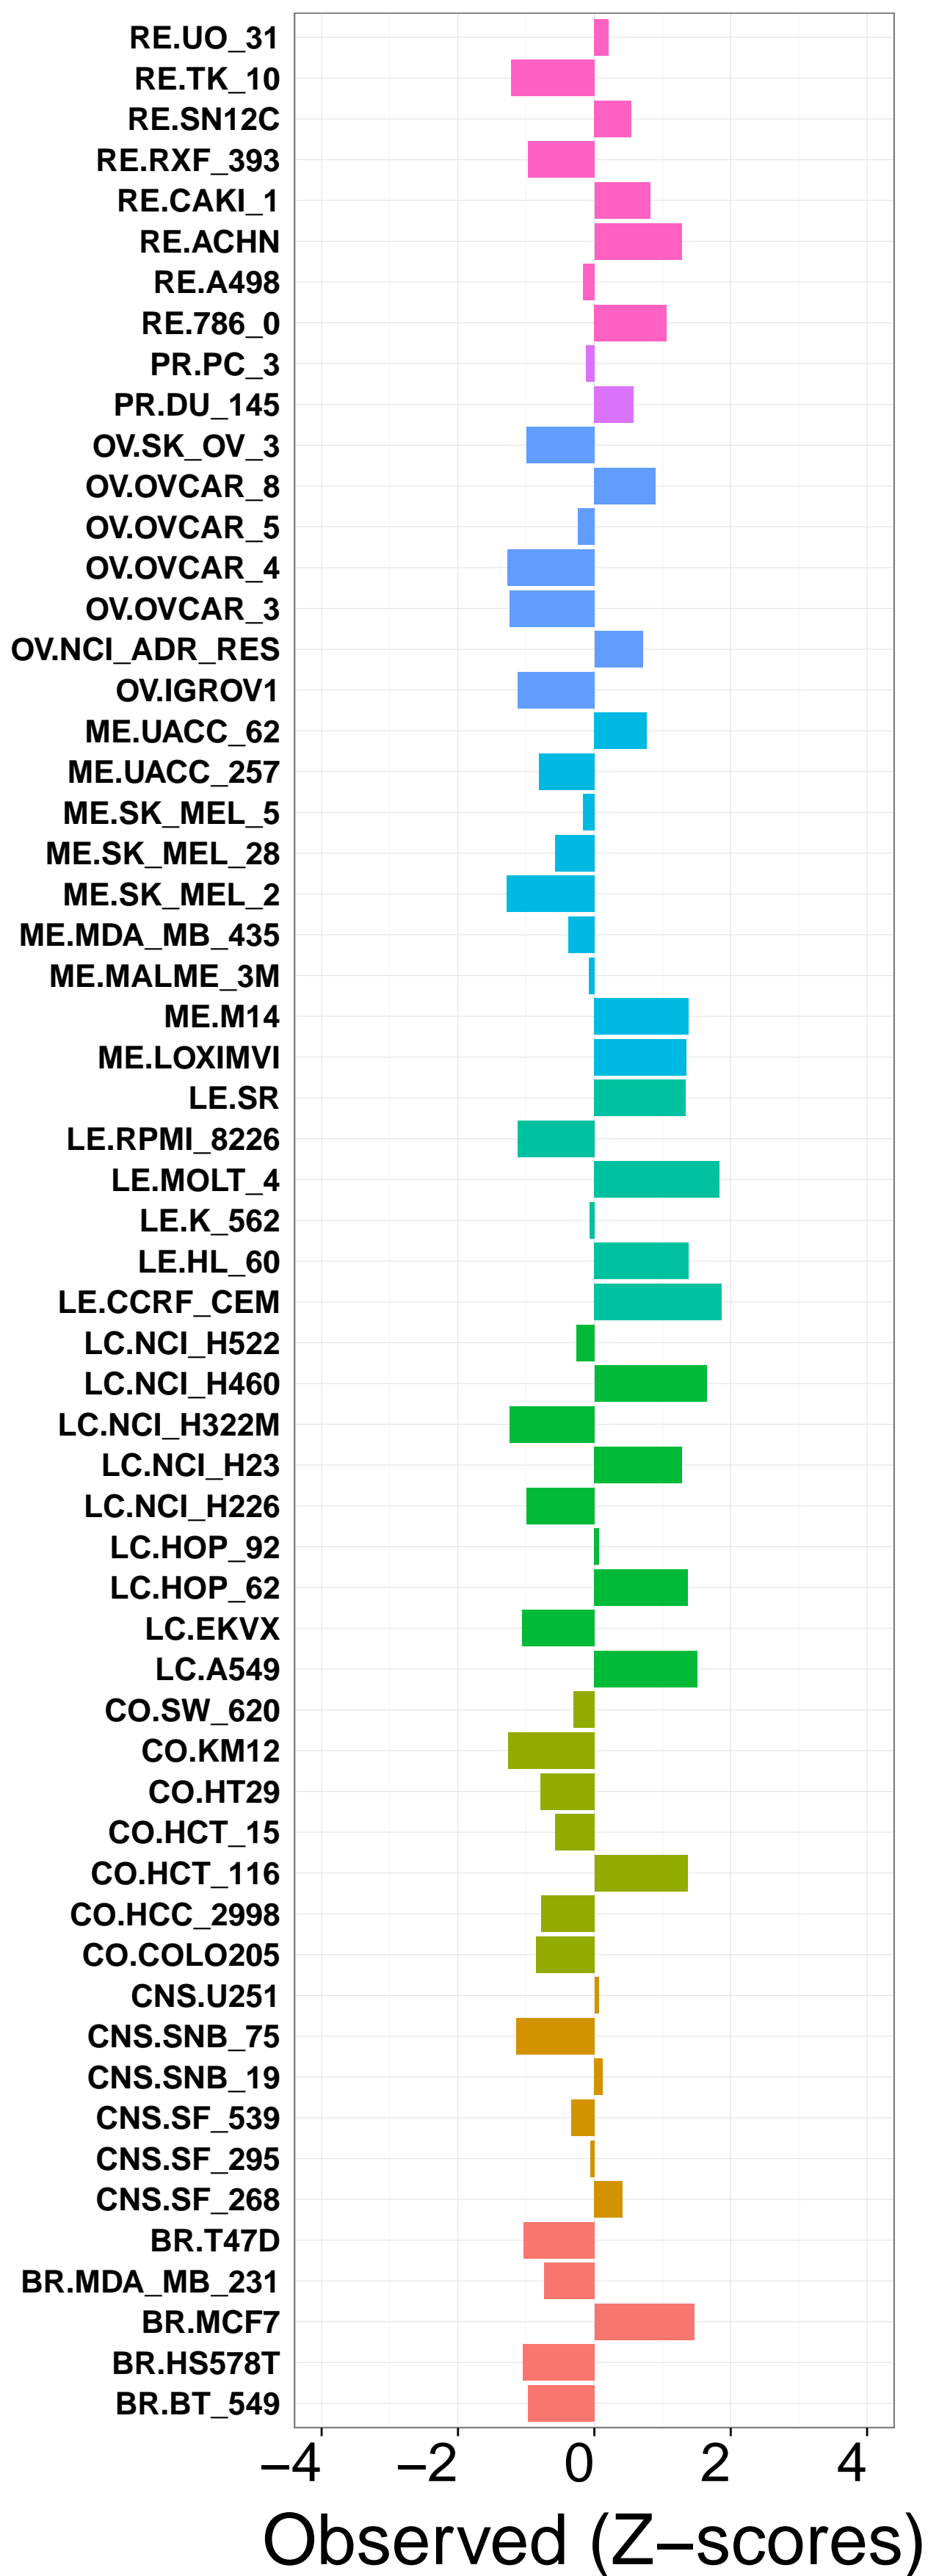

Observed (Z-scores)

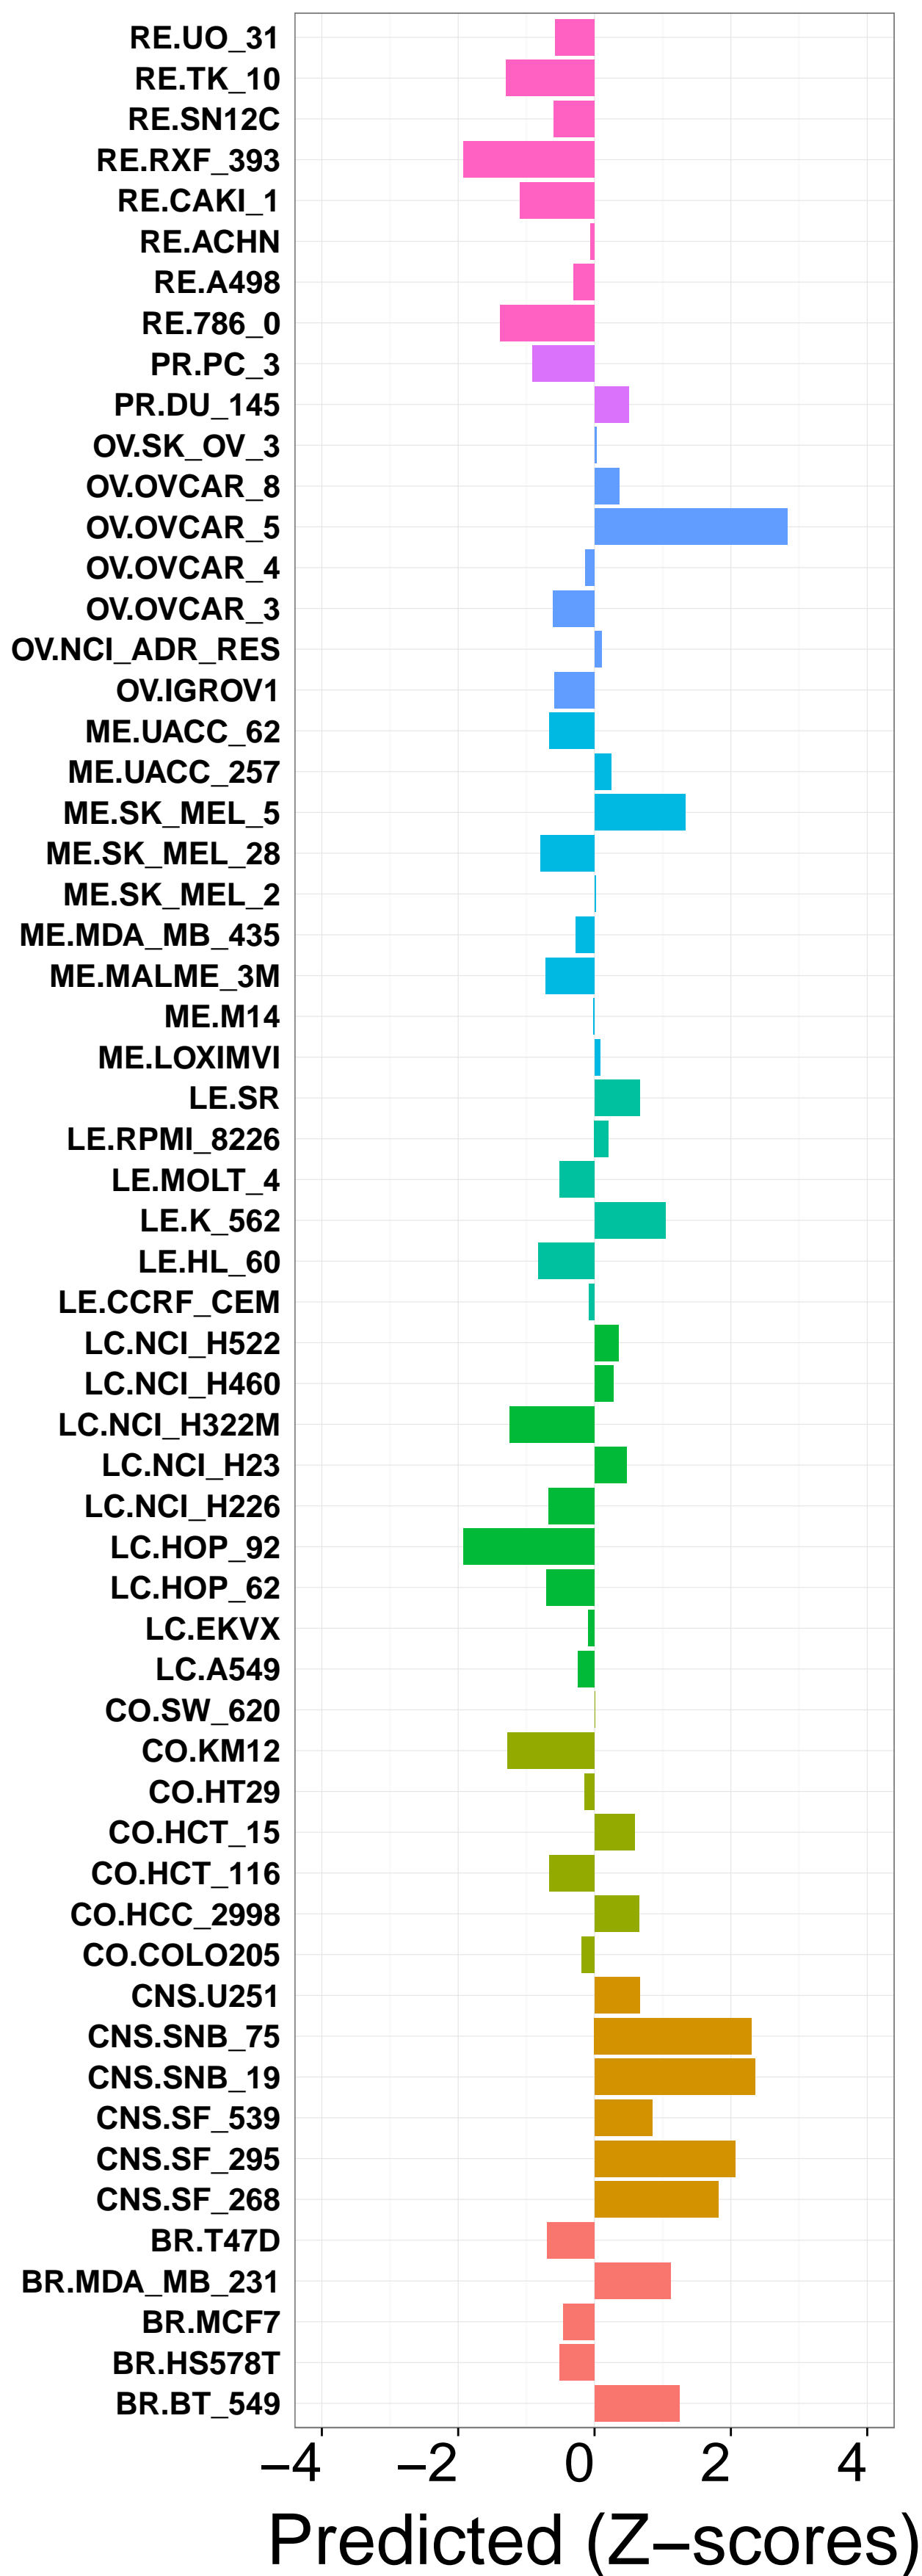

Predicted (Z-scores)

# NSC 639186, (LOTO)

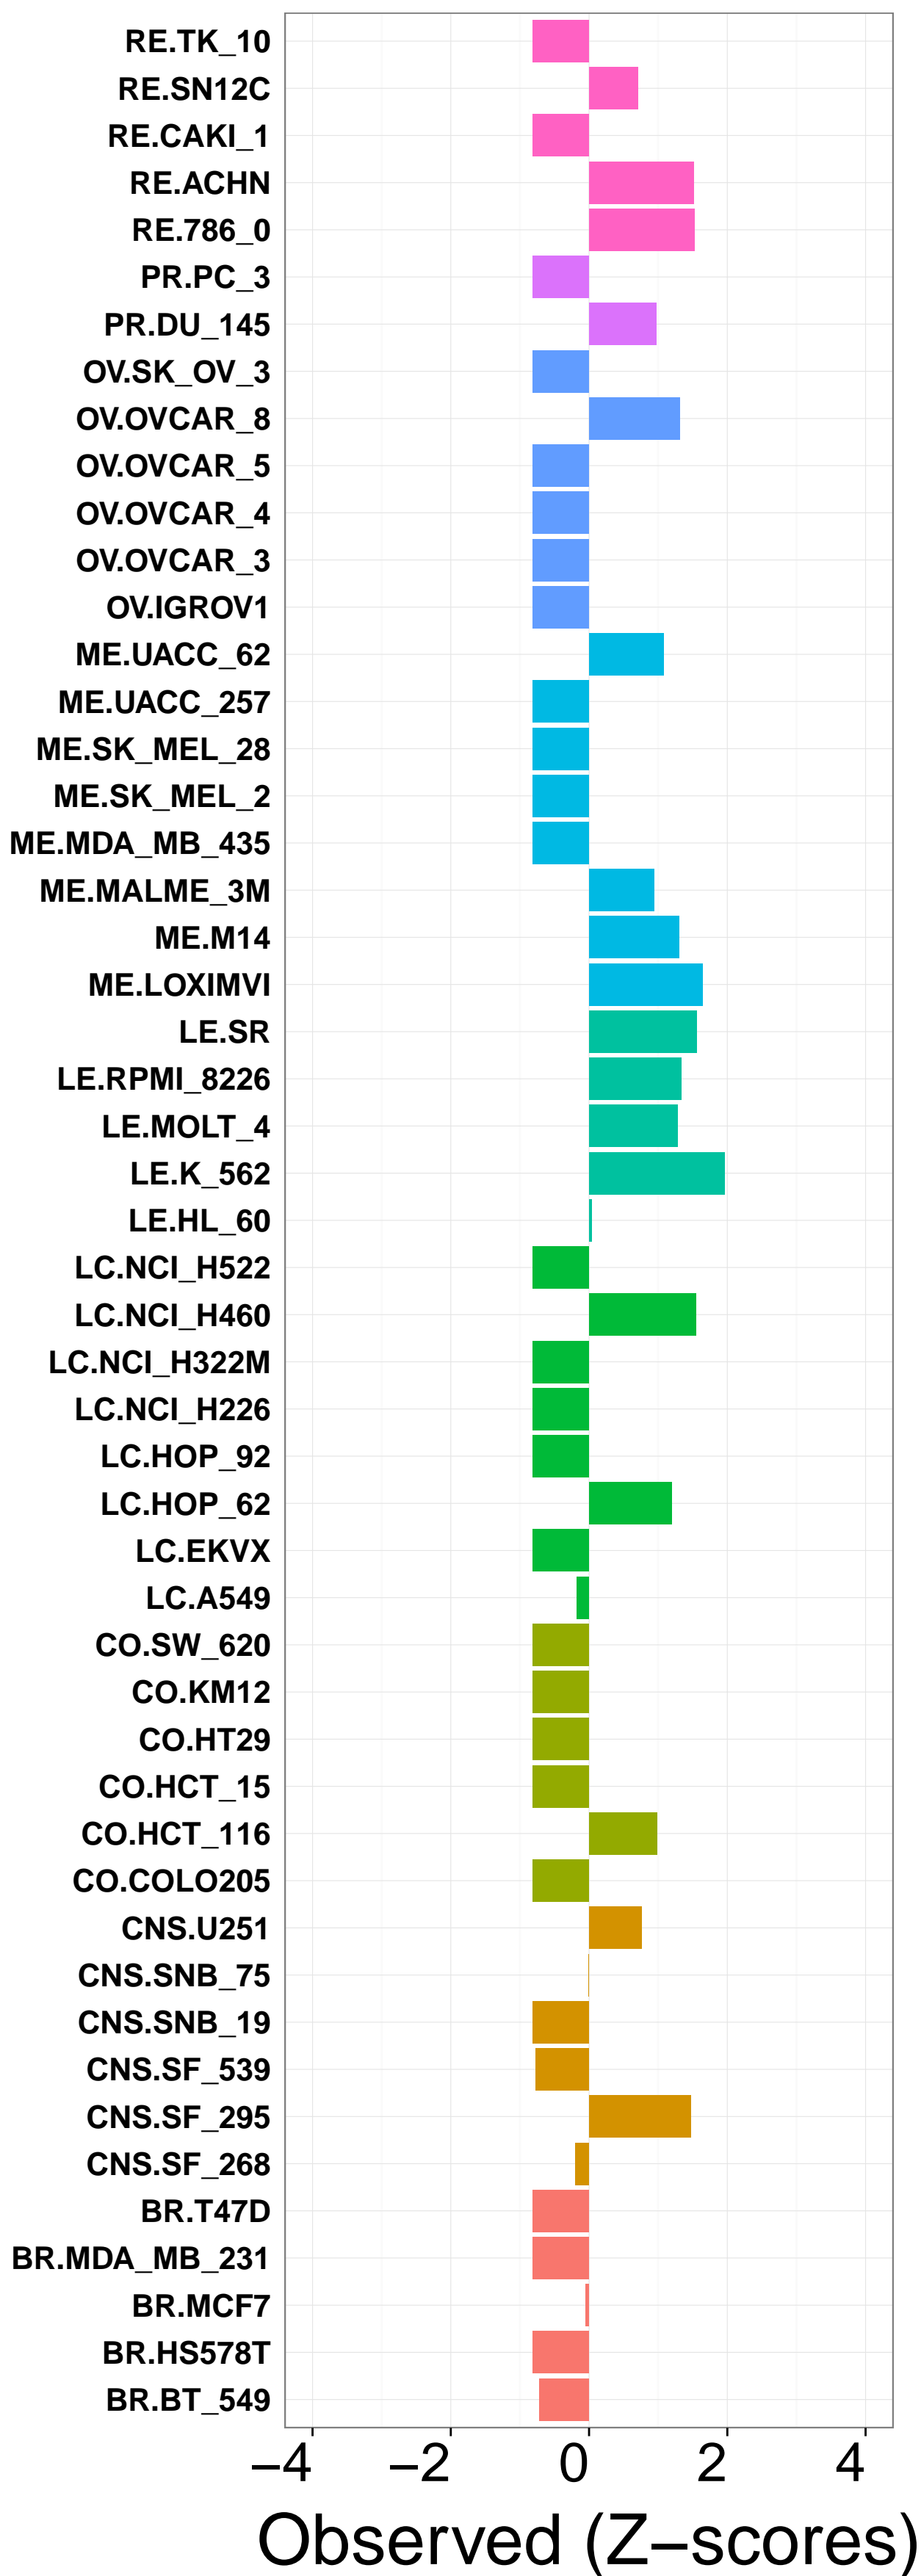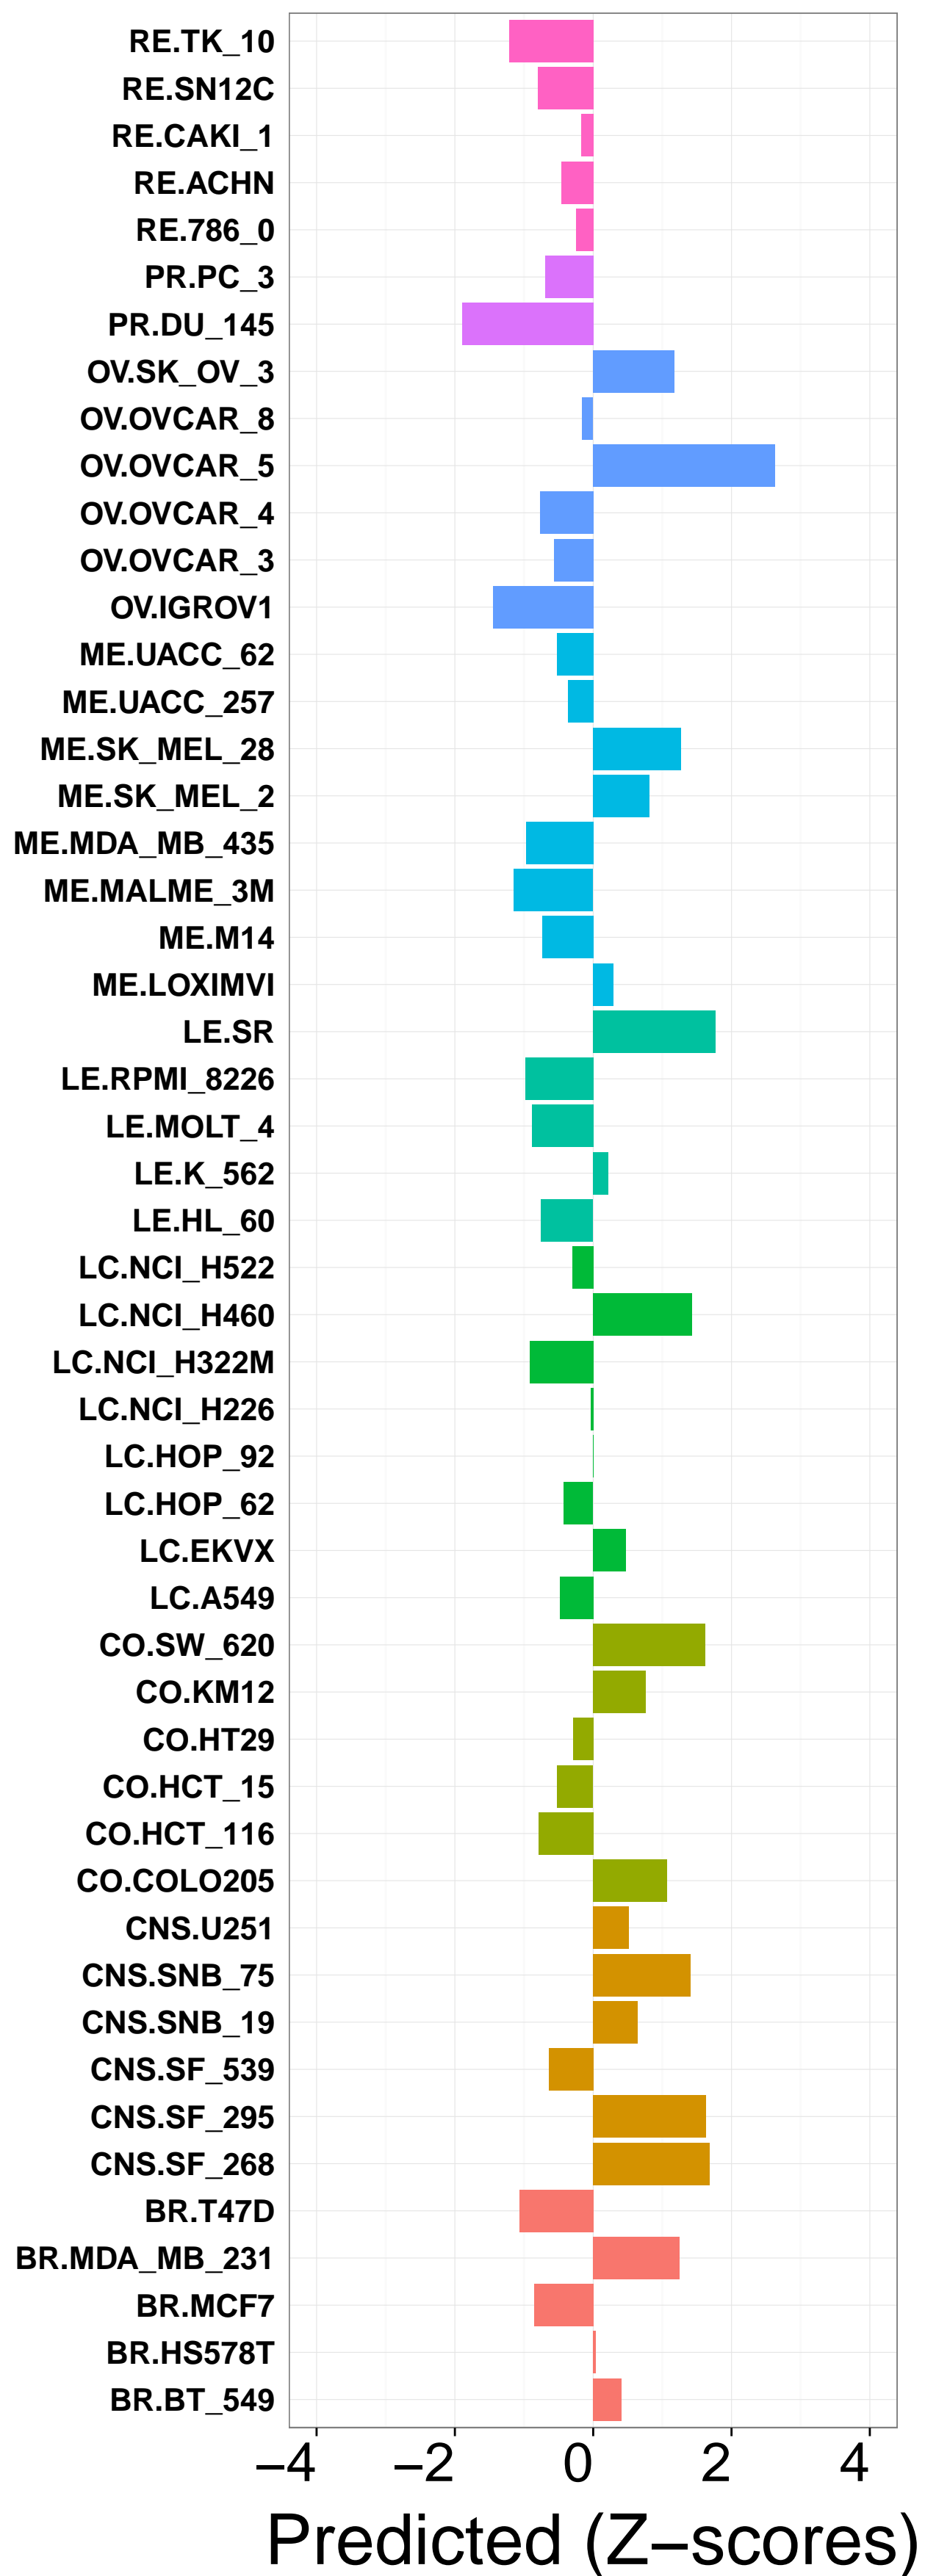



# NSC 656576, (LOTO)

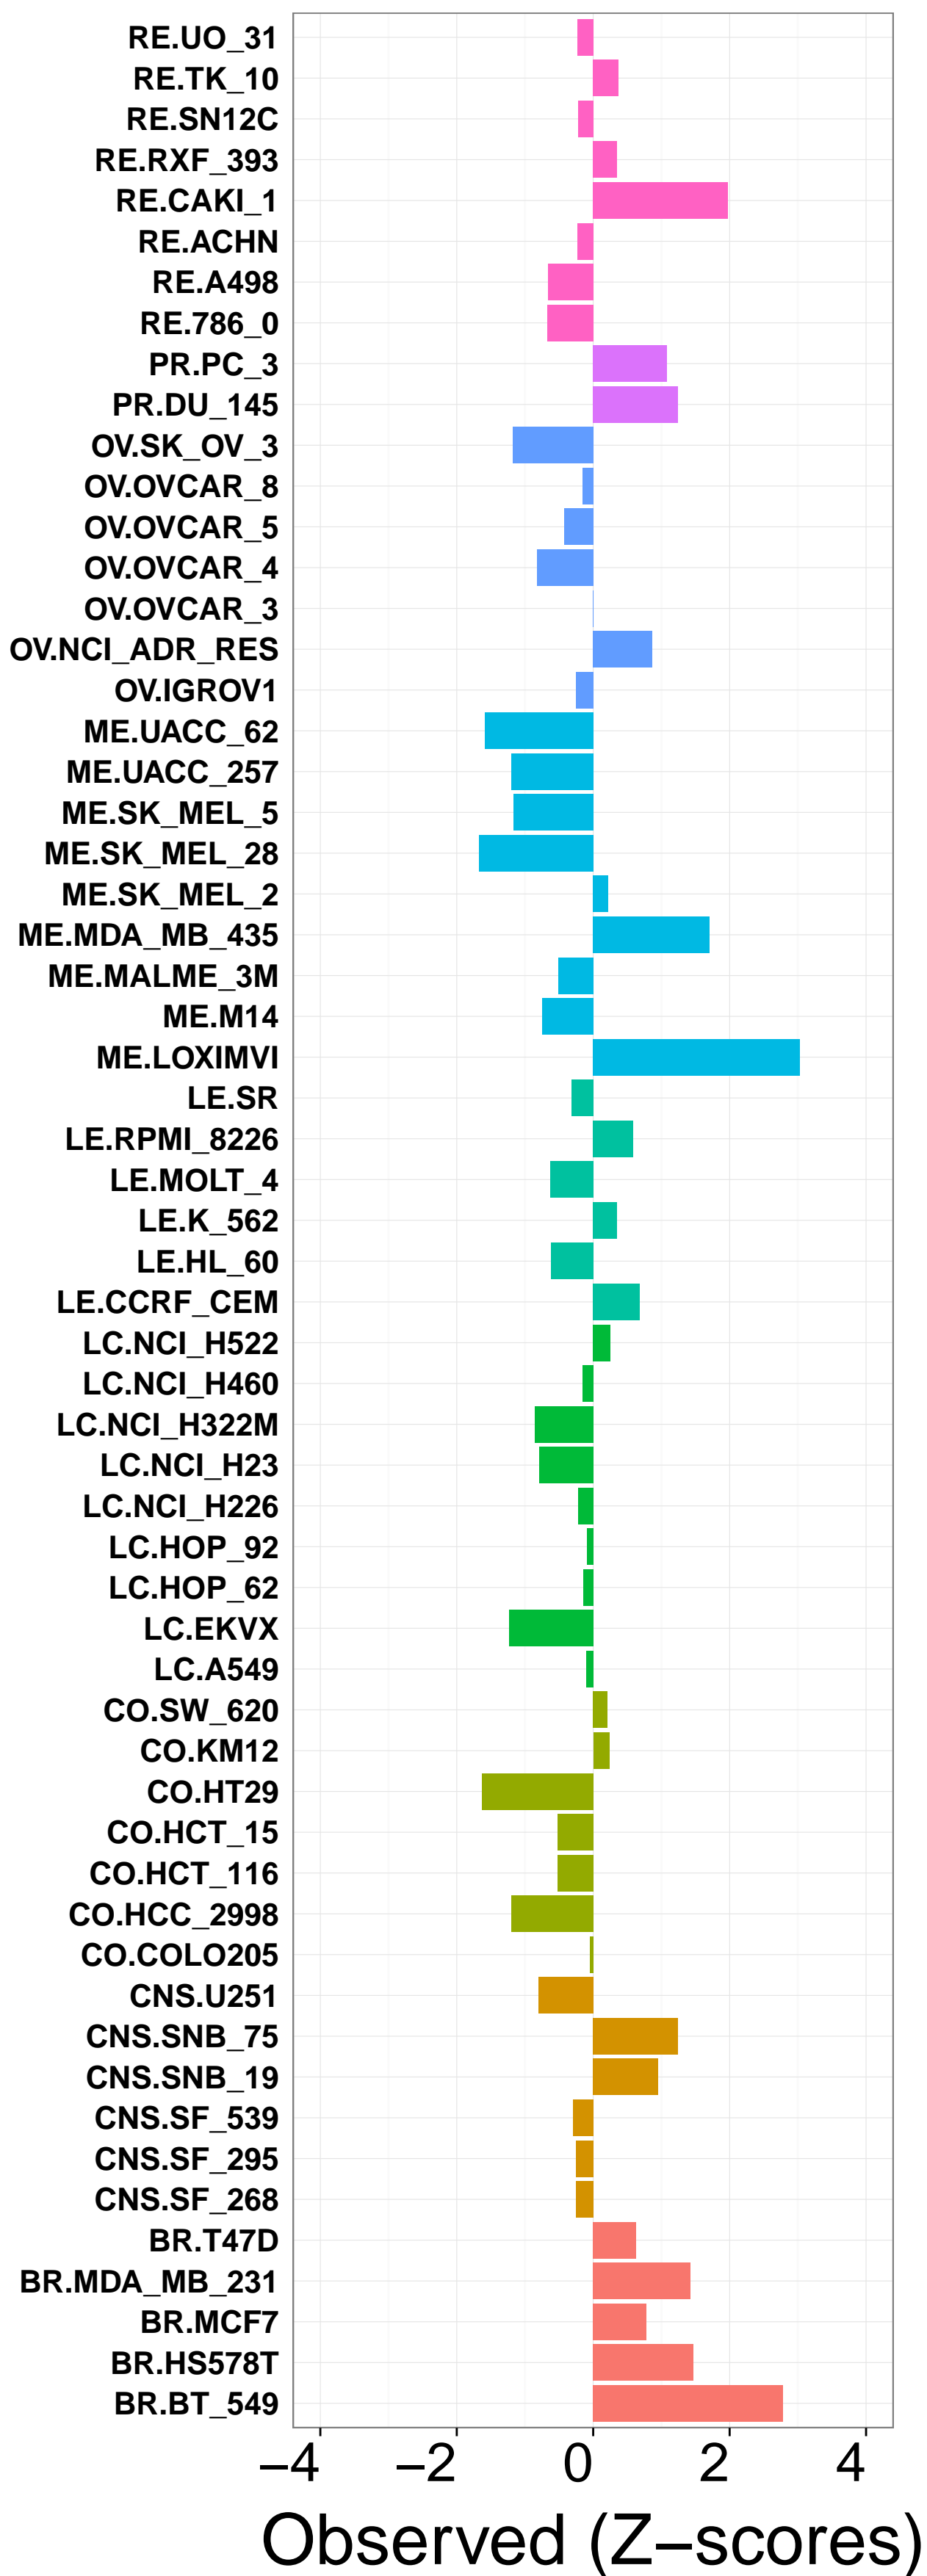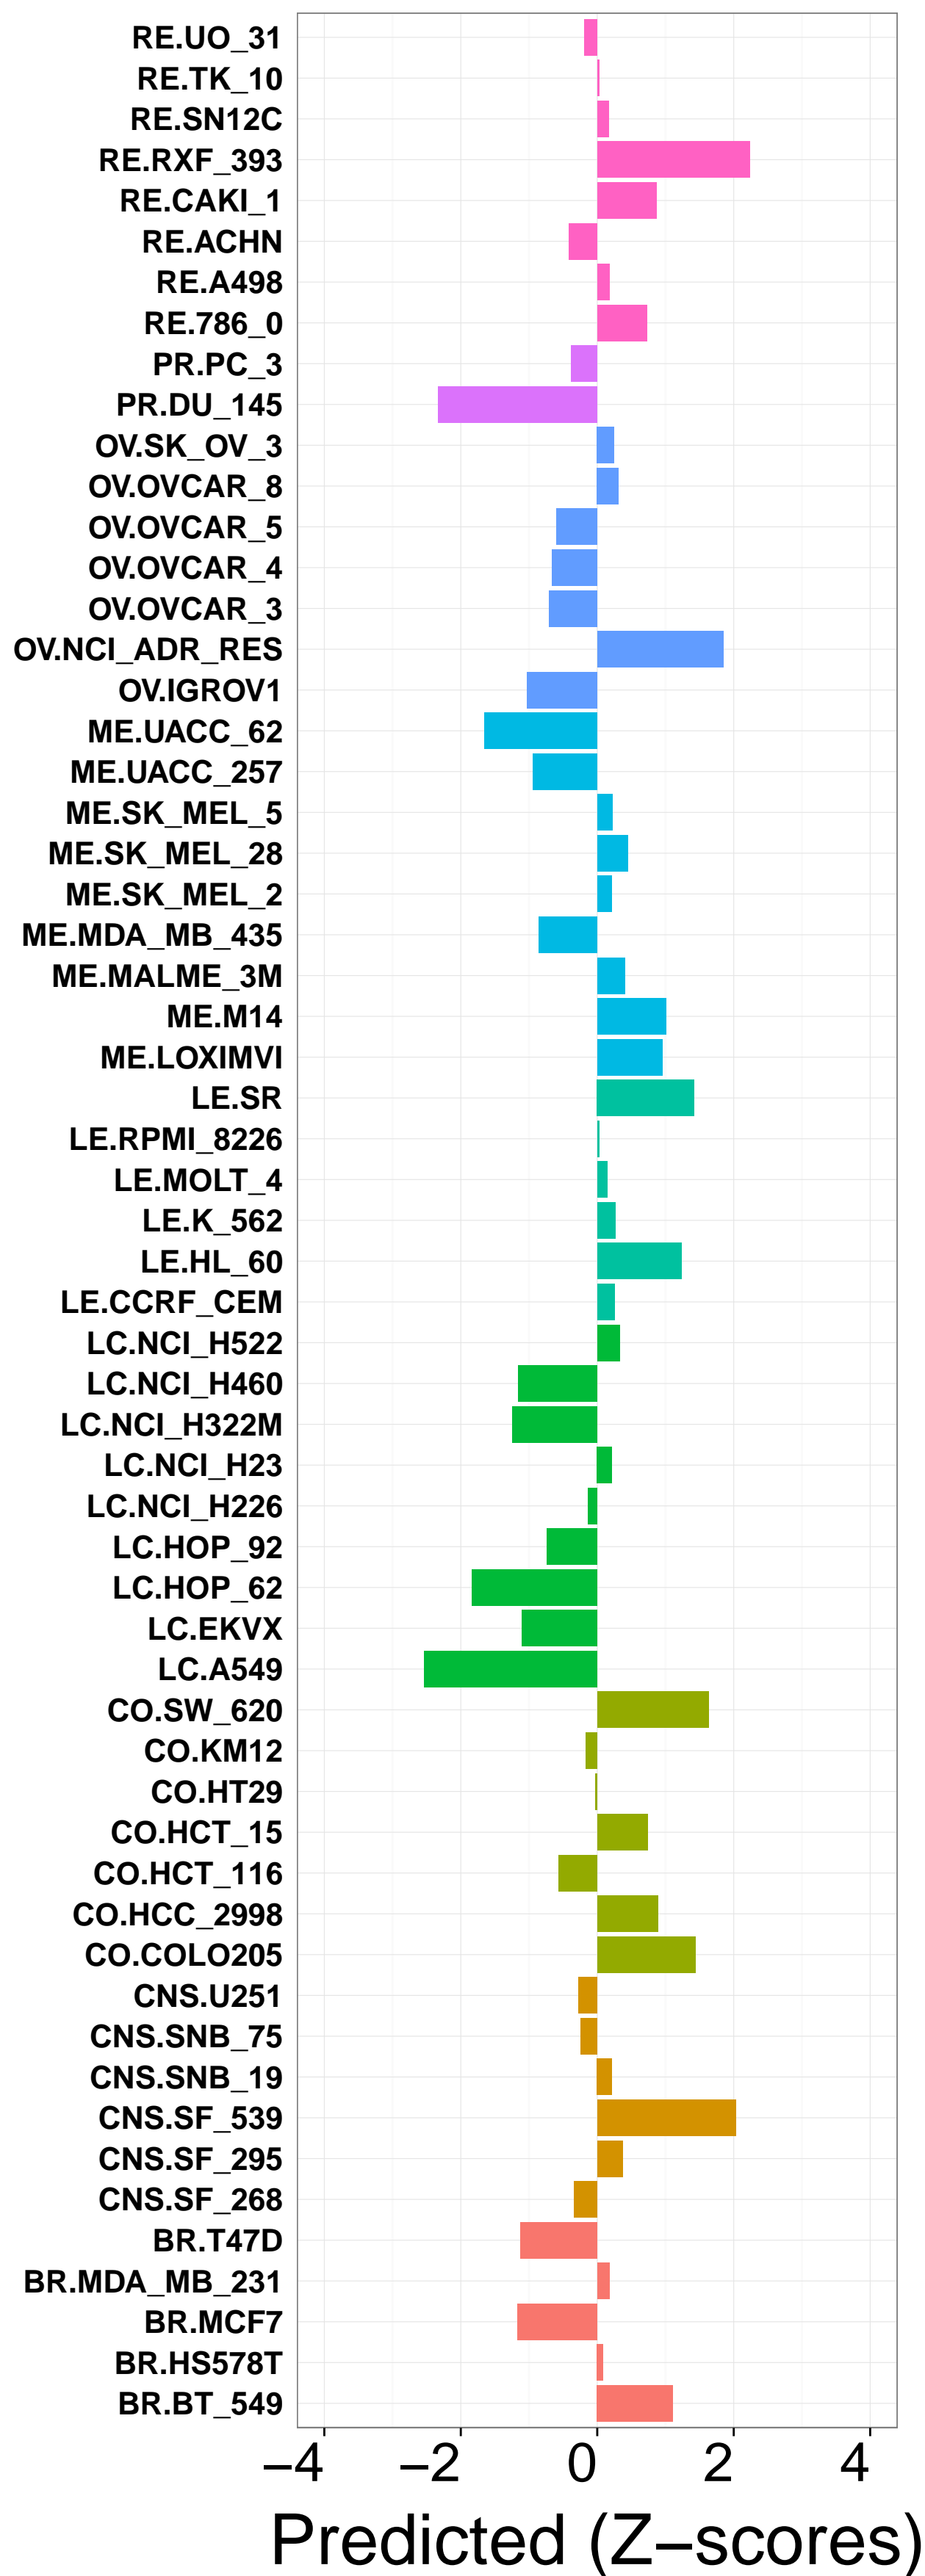

# NSC 673596, (LOTO)

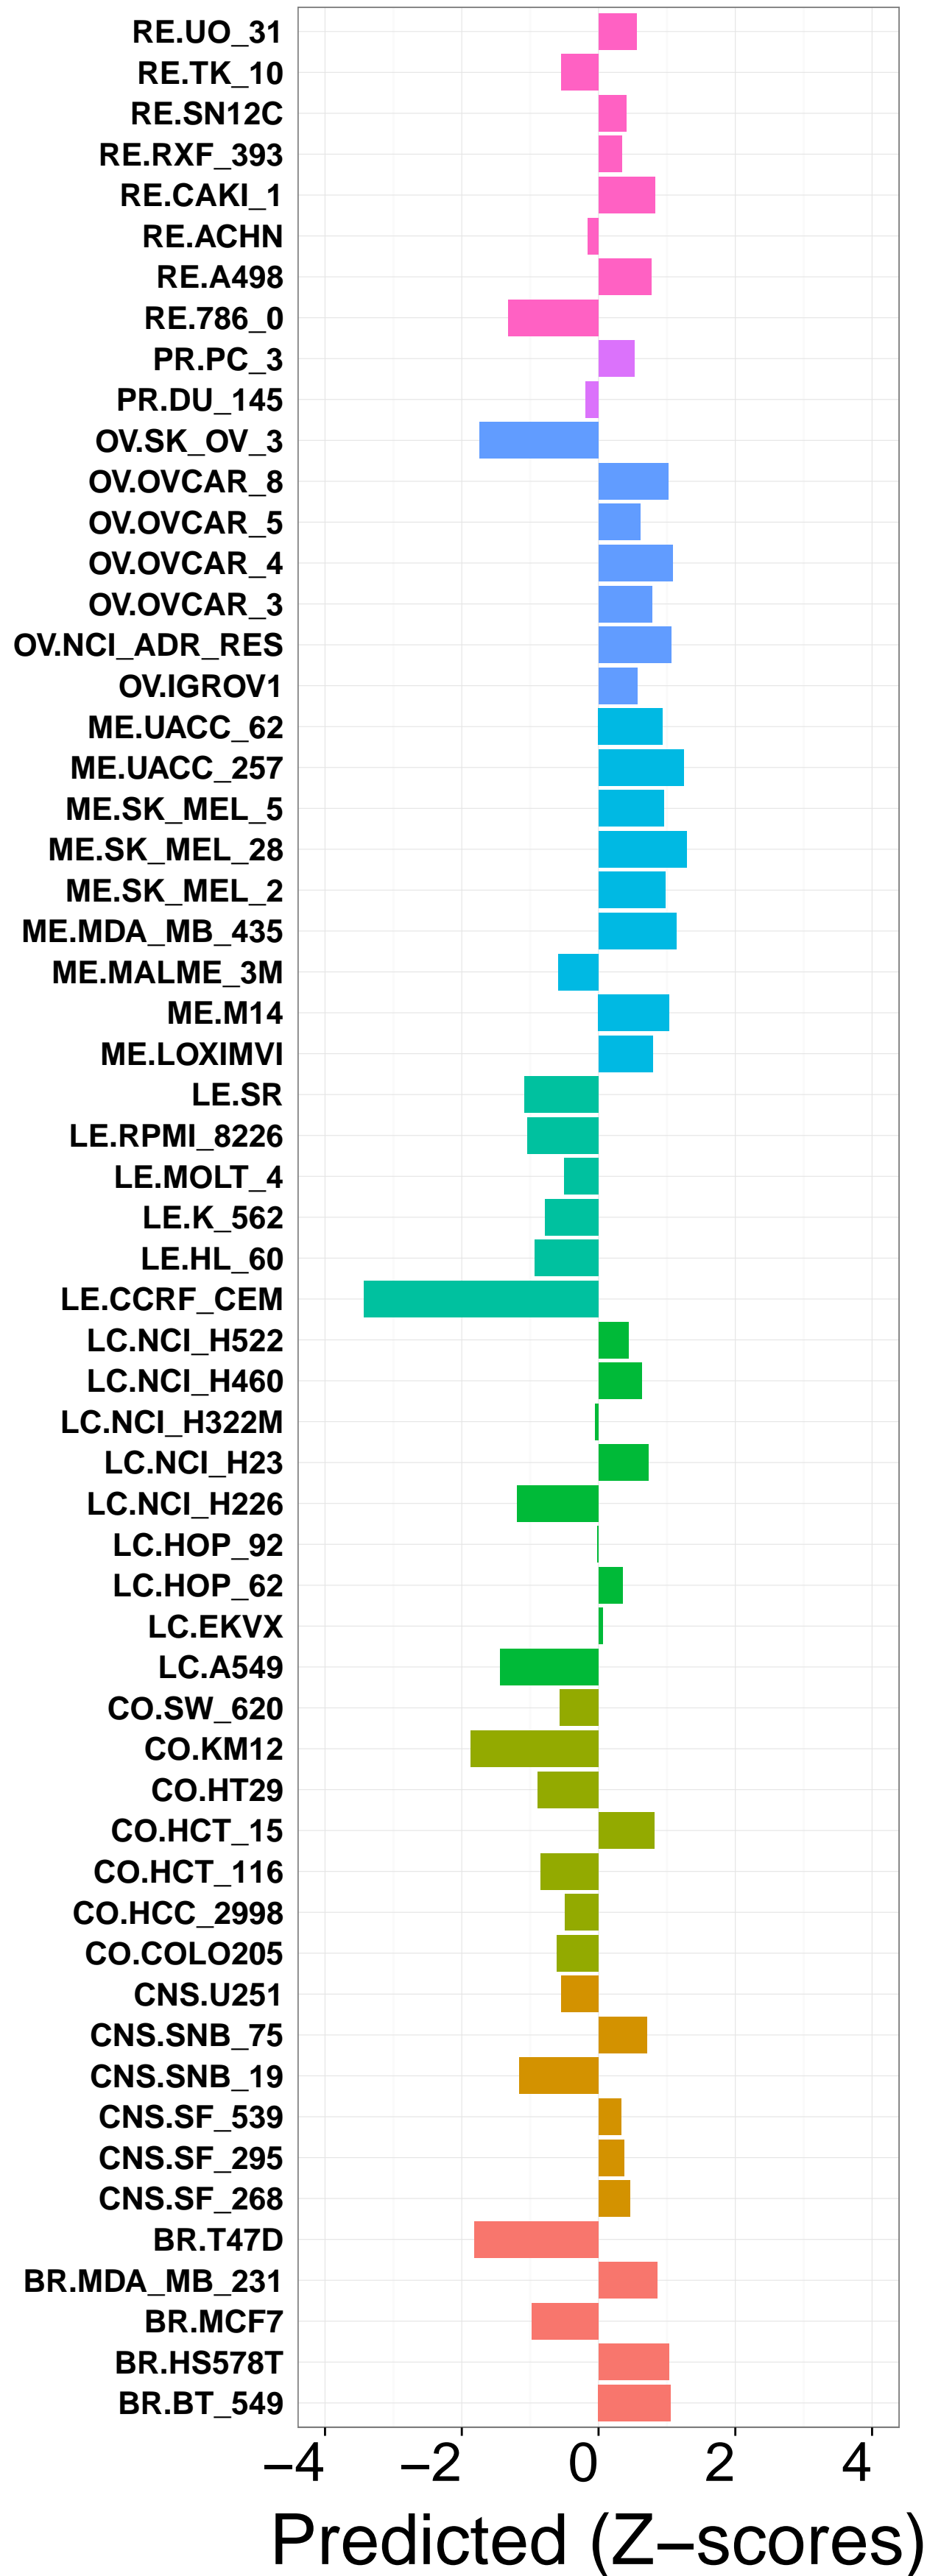

# NSC 686288, (LOTO)

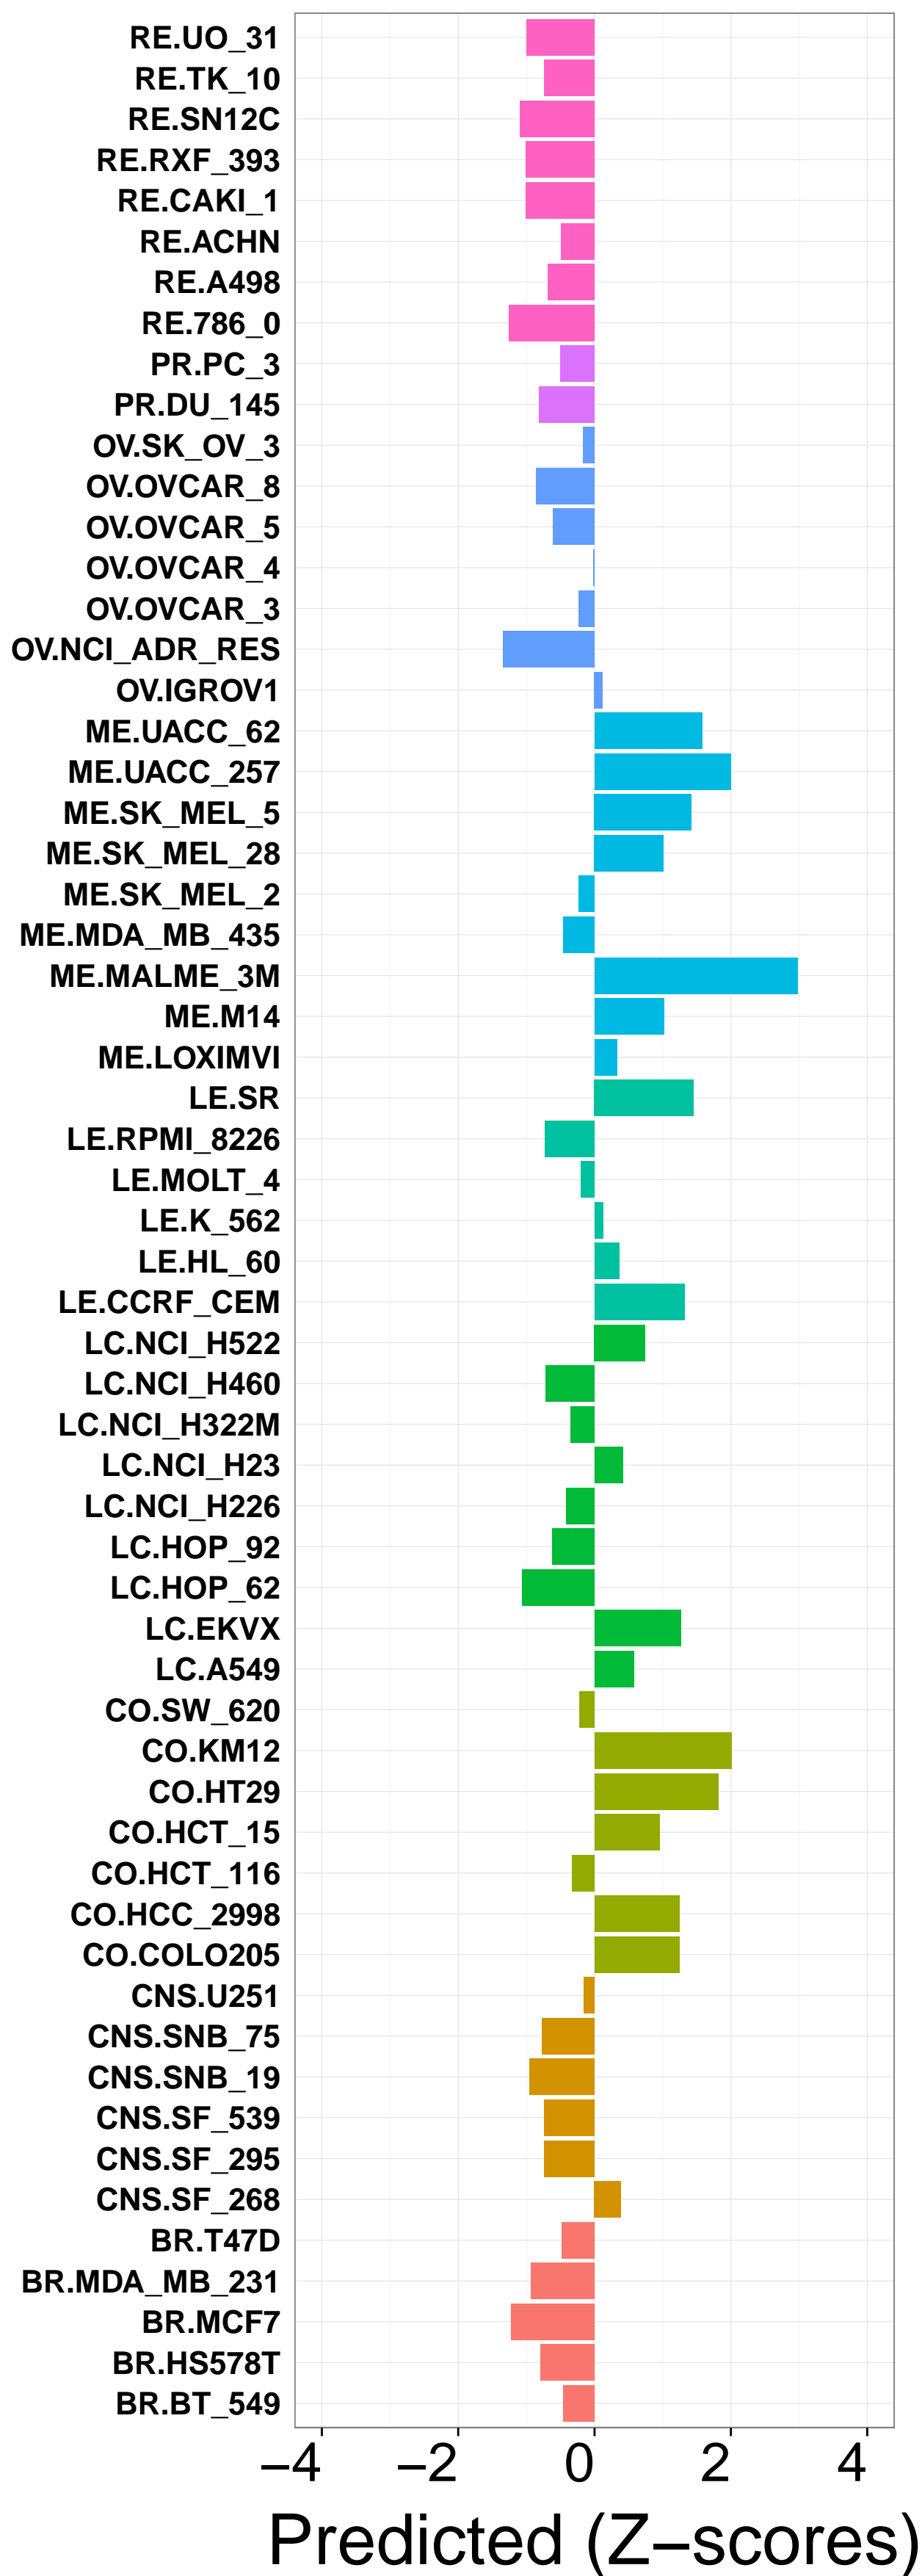

# NSC 698037, (LOTO)

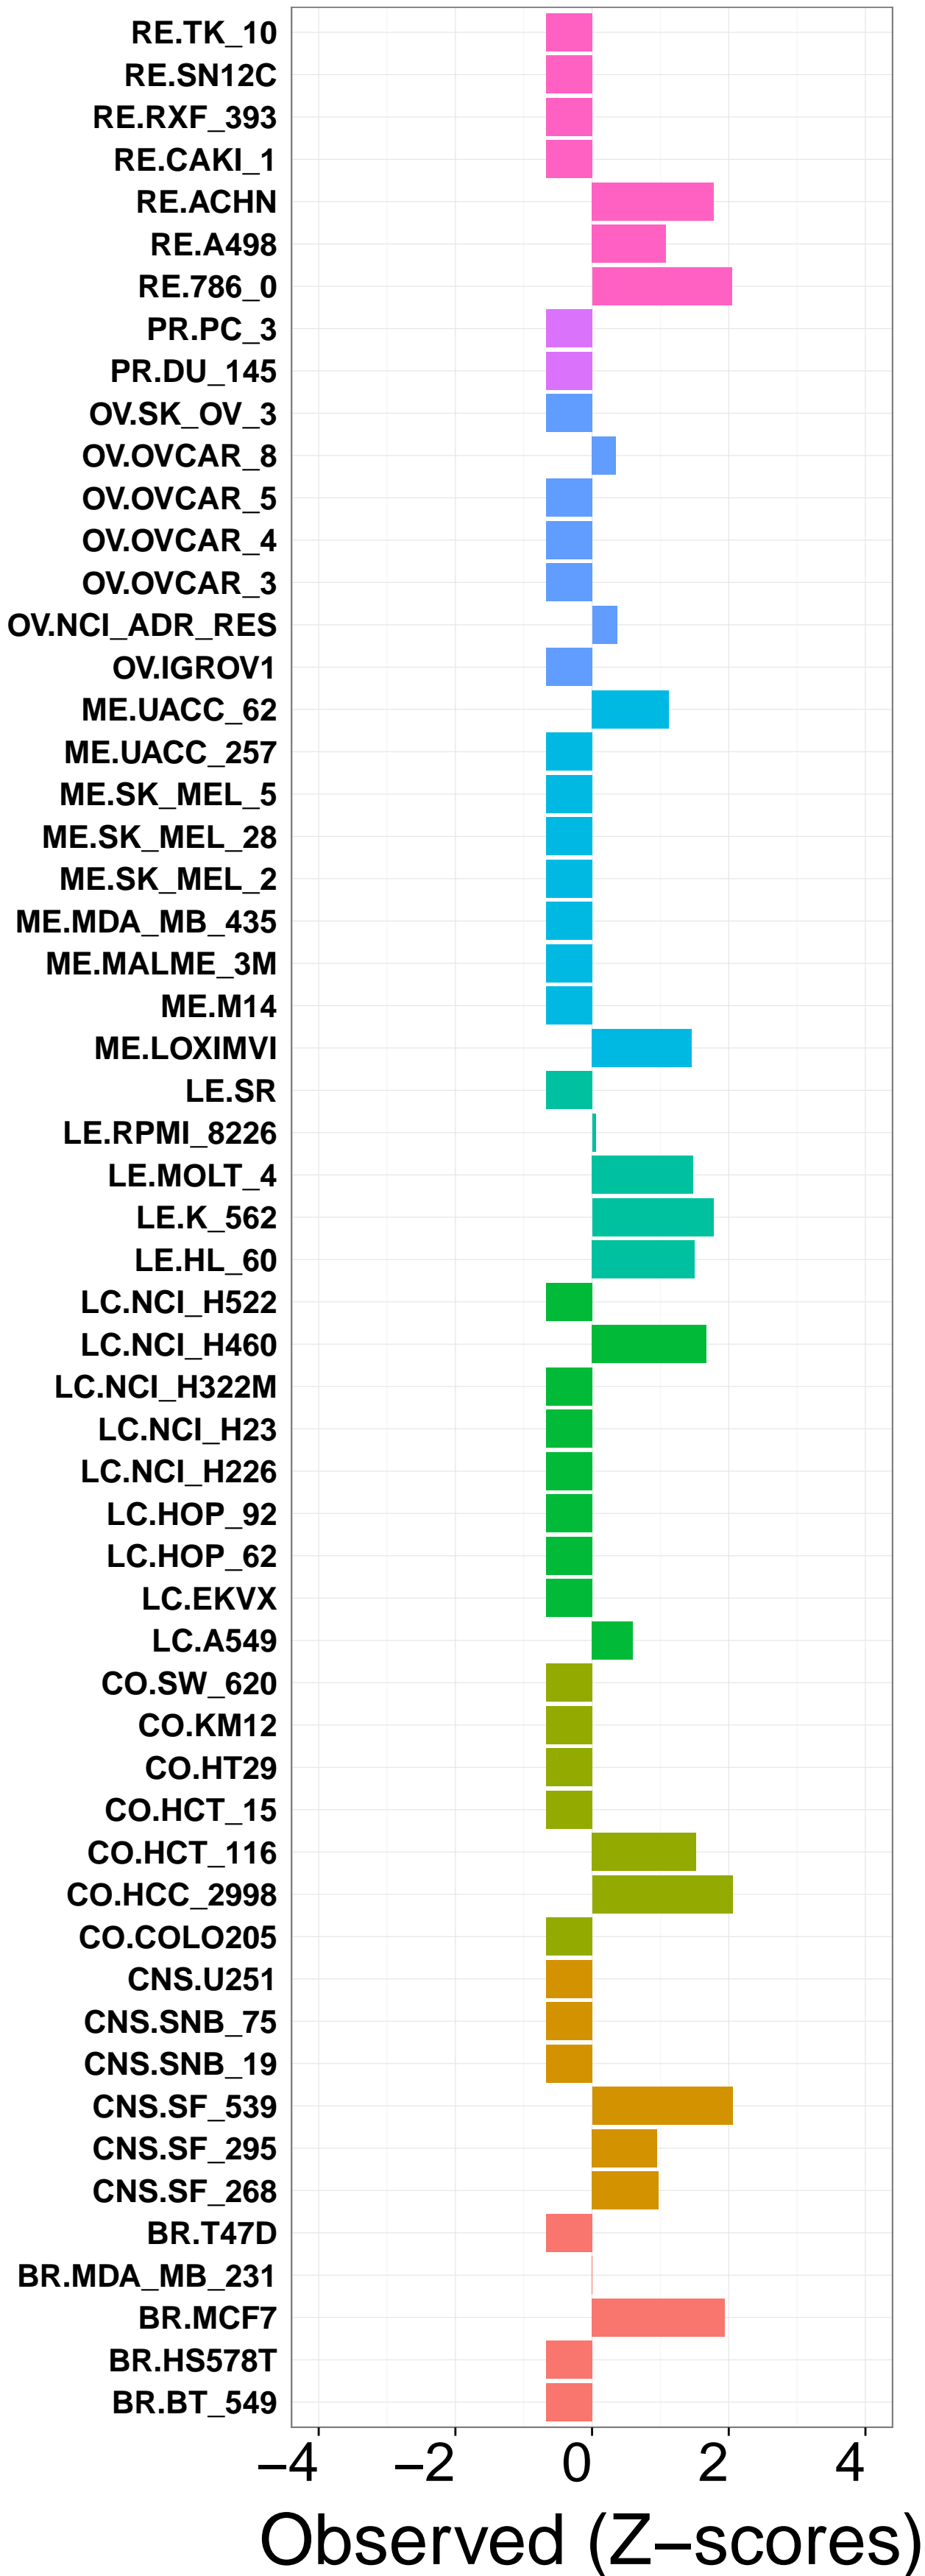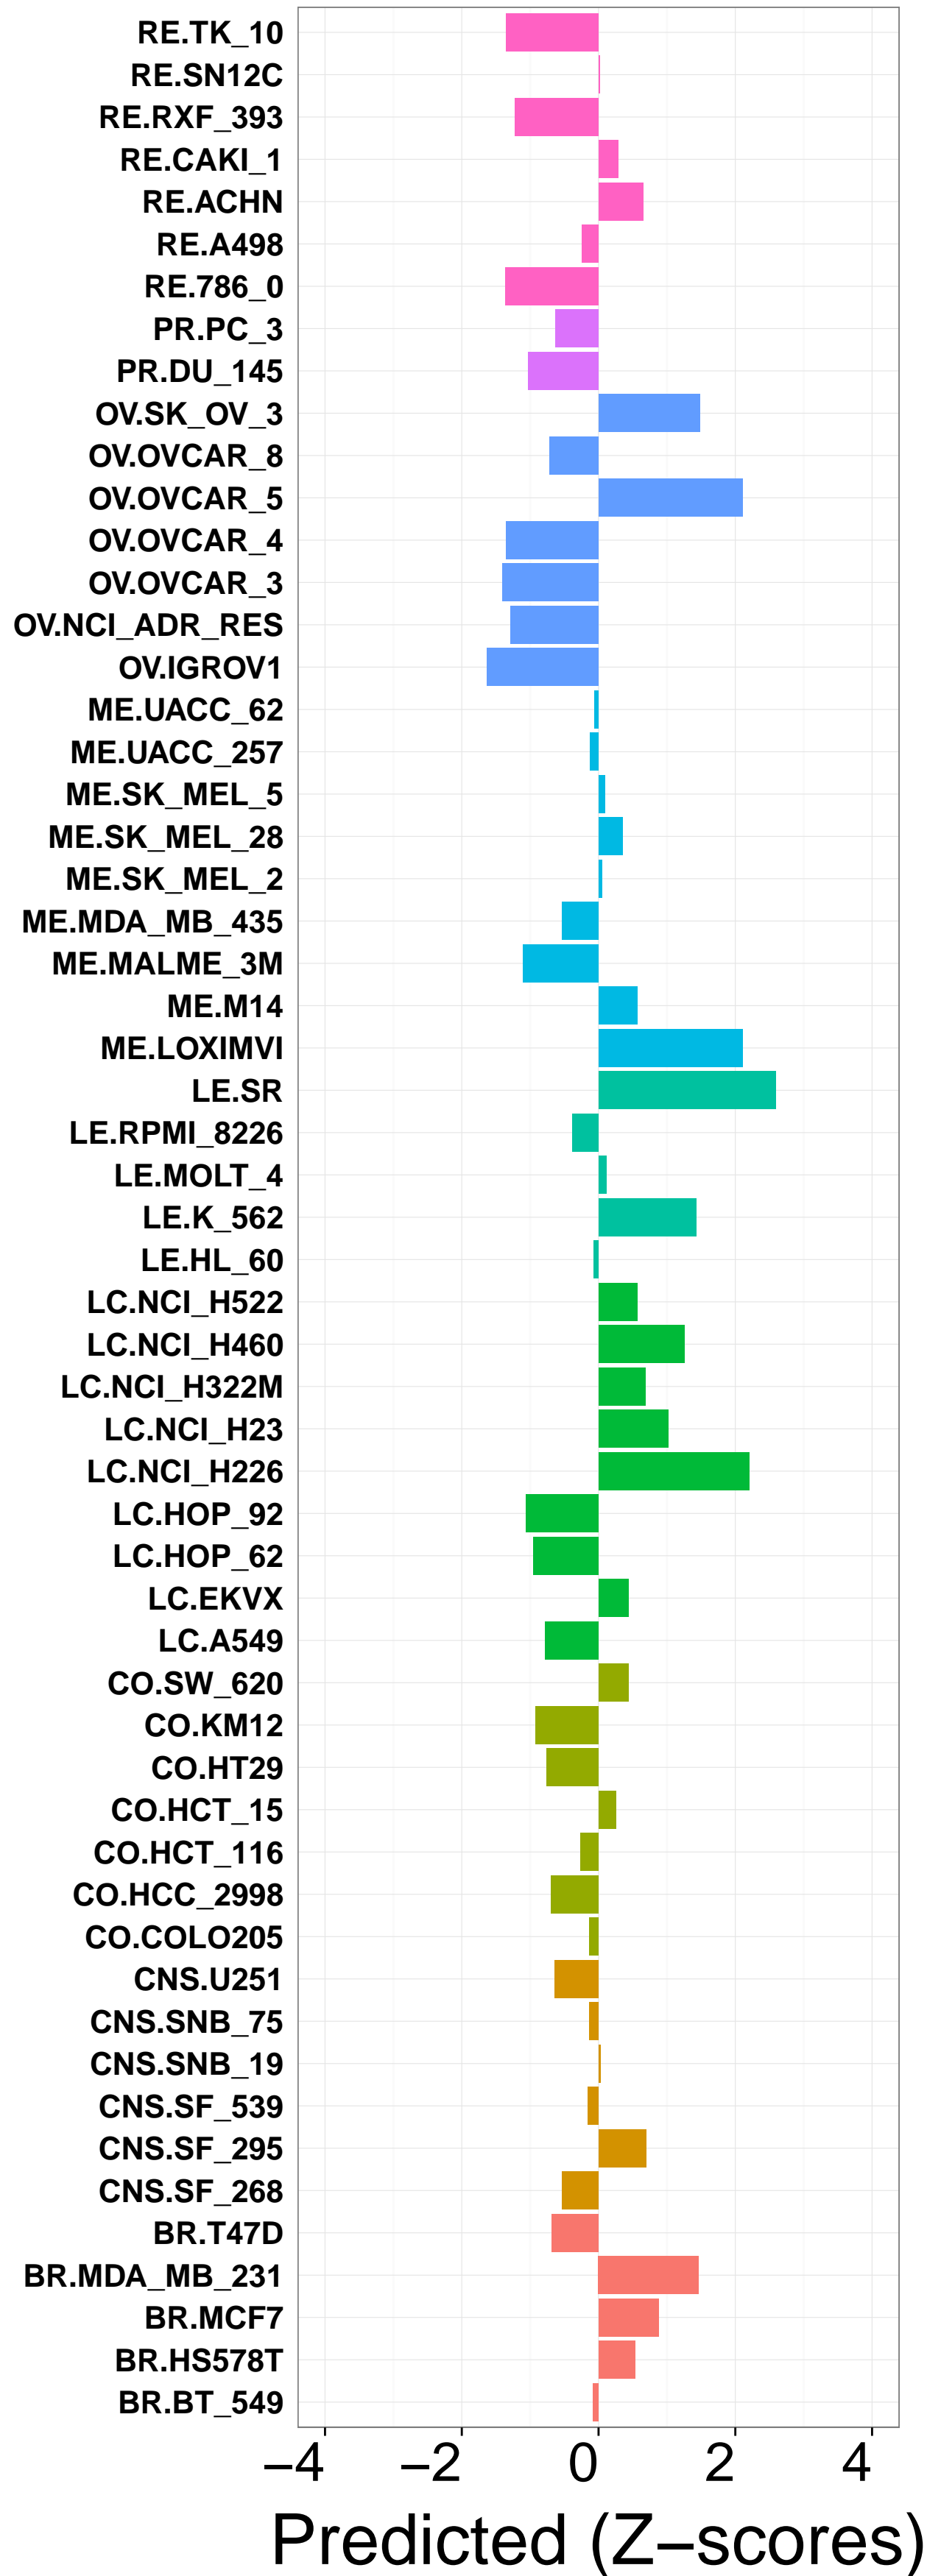

# NSC 707545, Alvespimycin (LOTO)

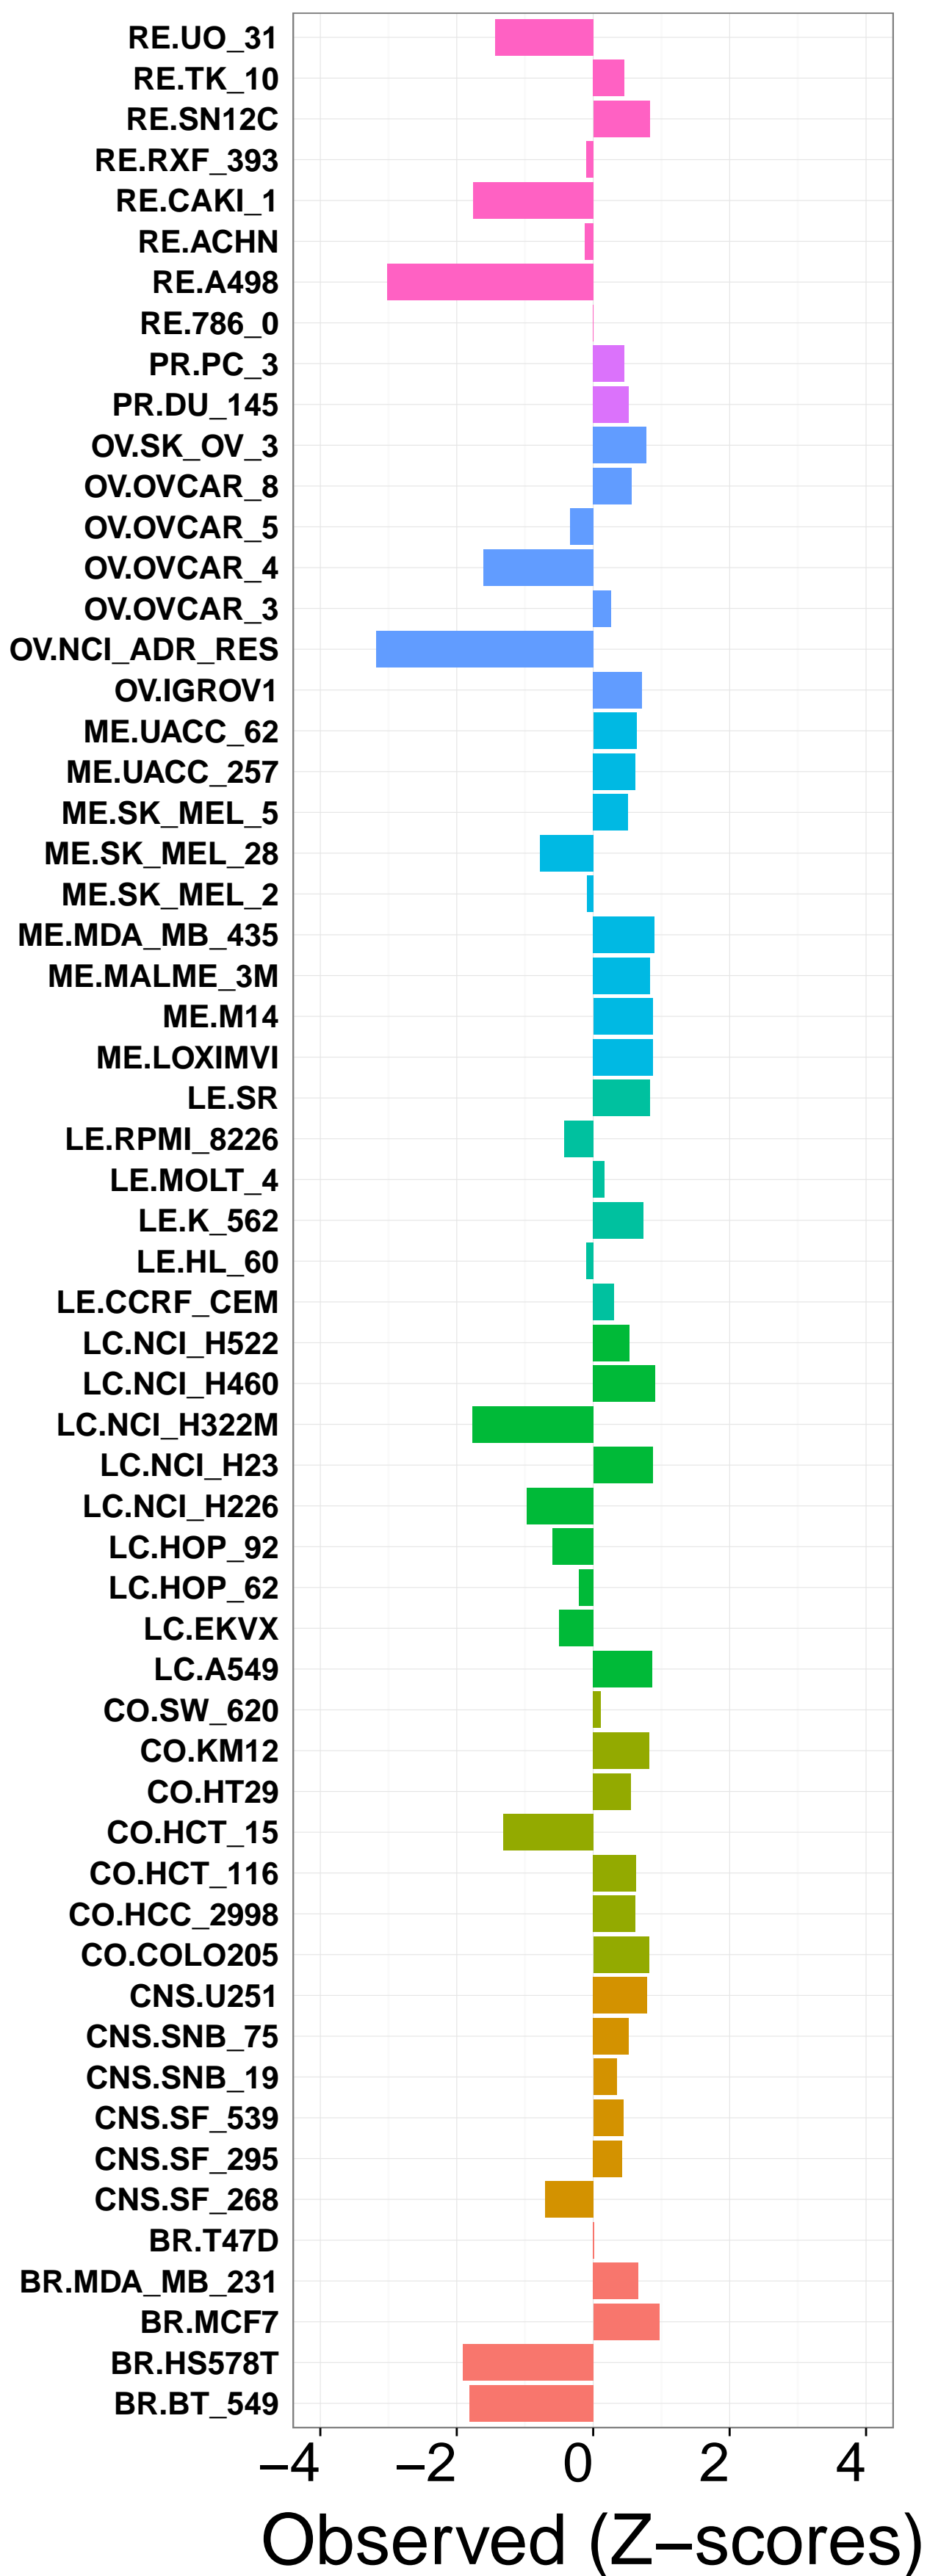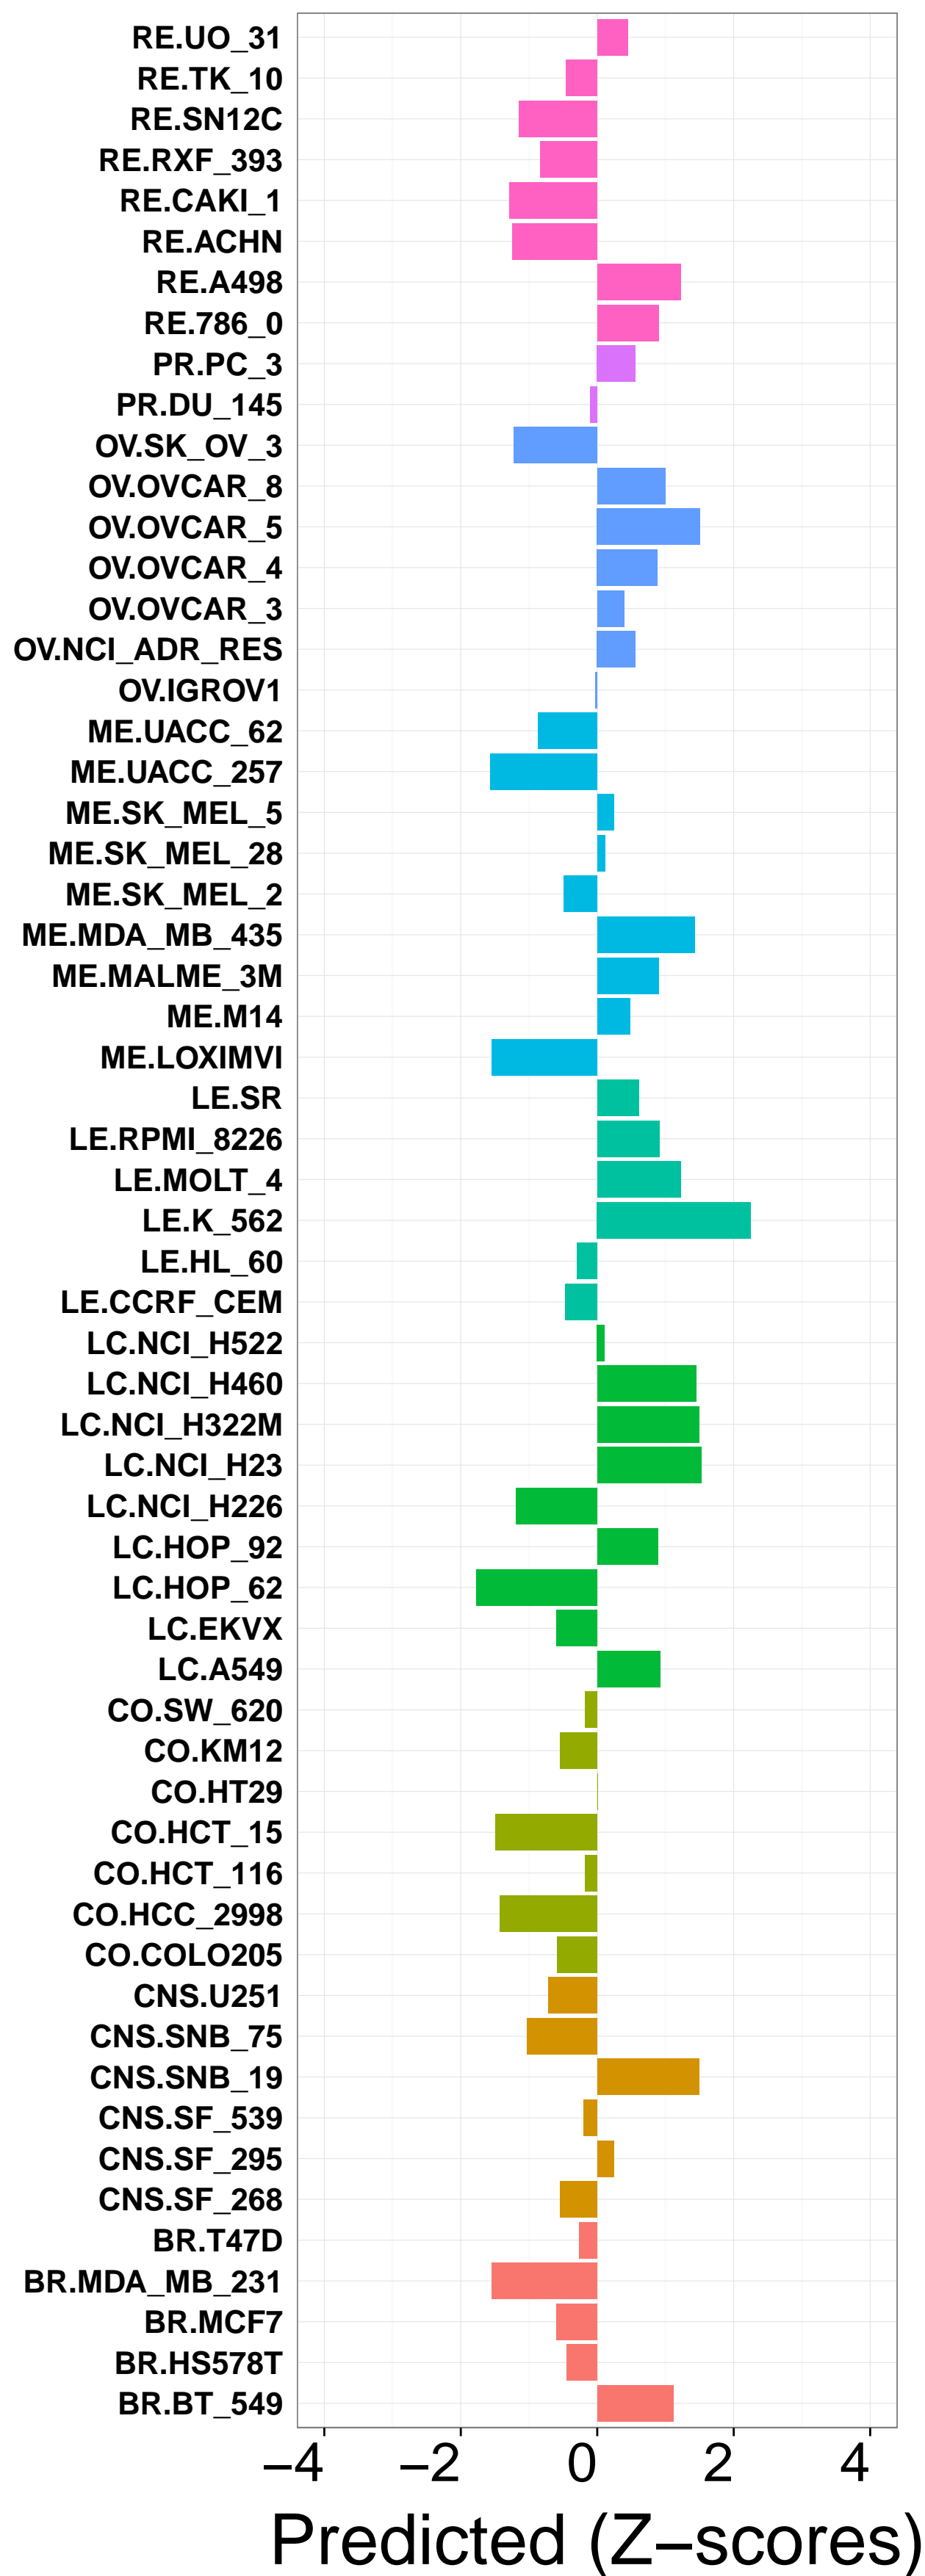



# NSC 710297, OMDPI (LOTO)

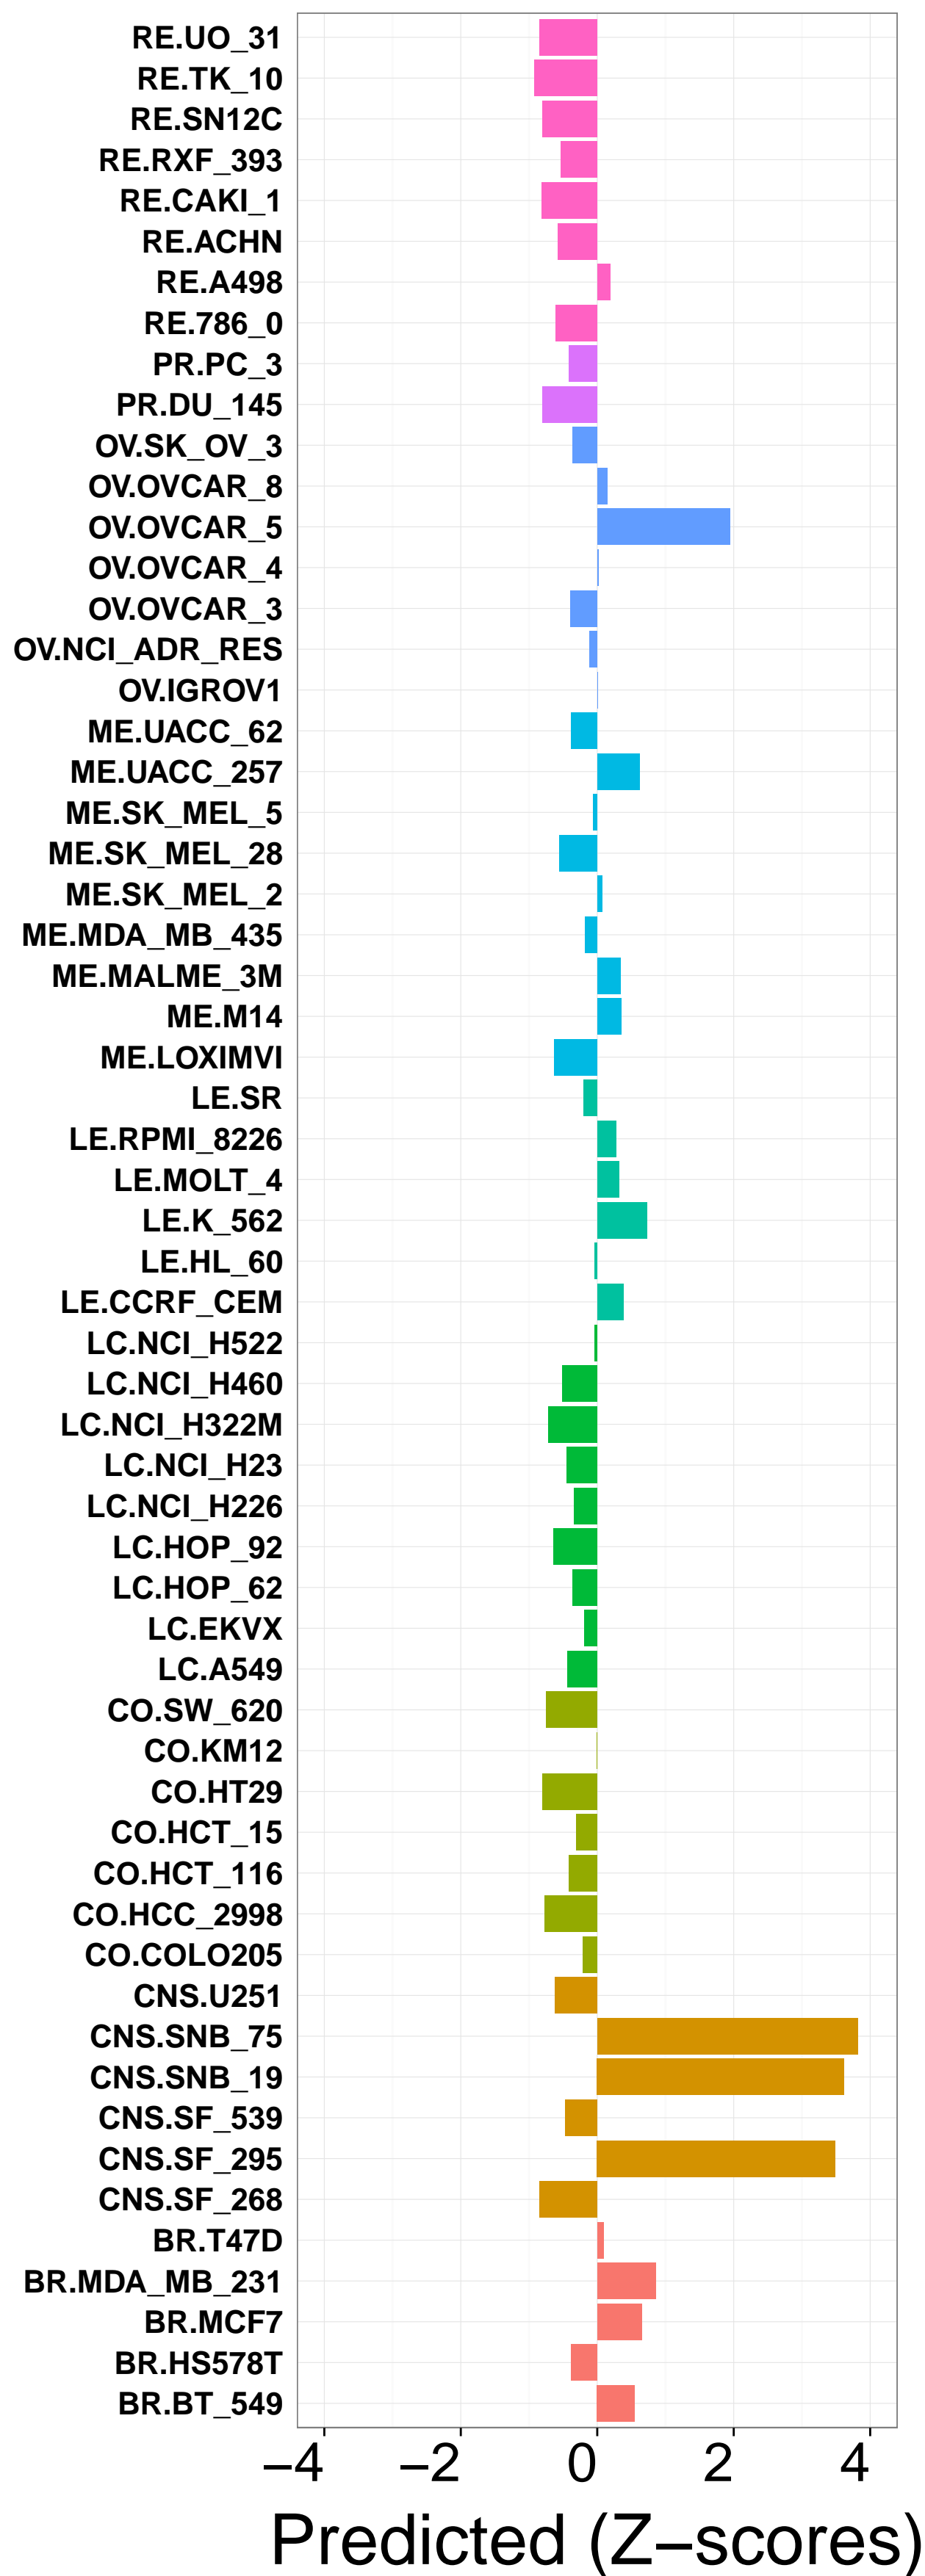

# NSC 710464, (LOTO)

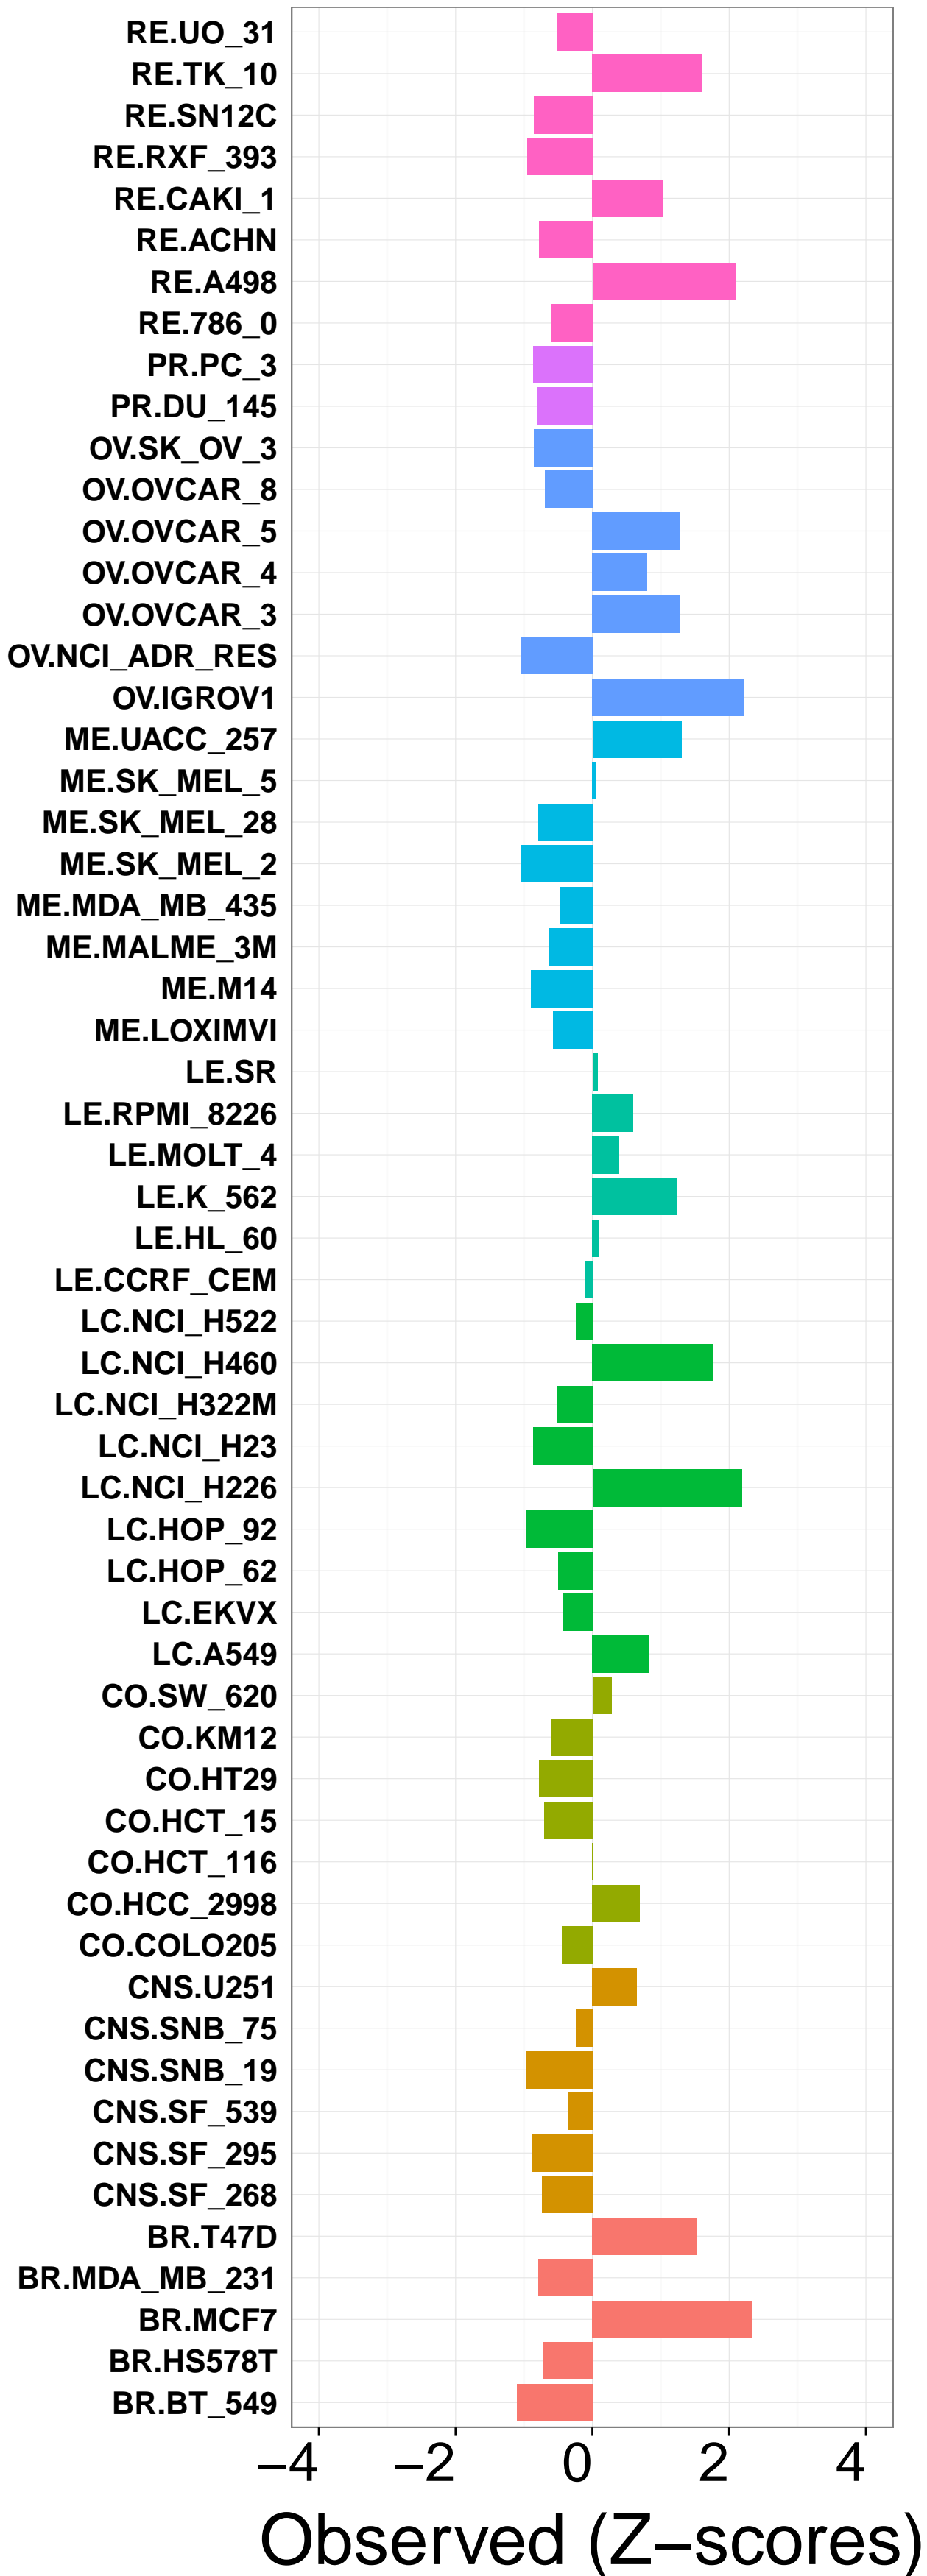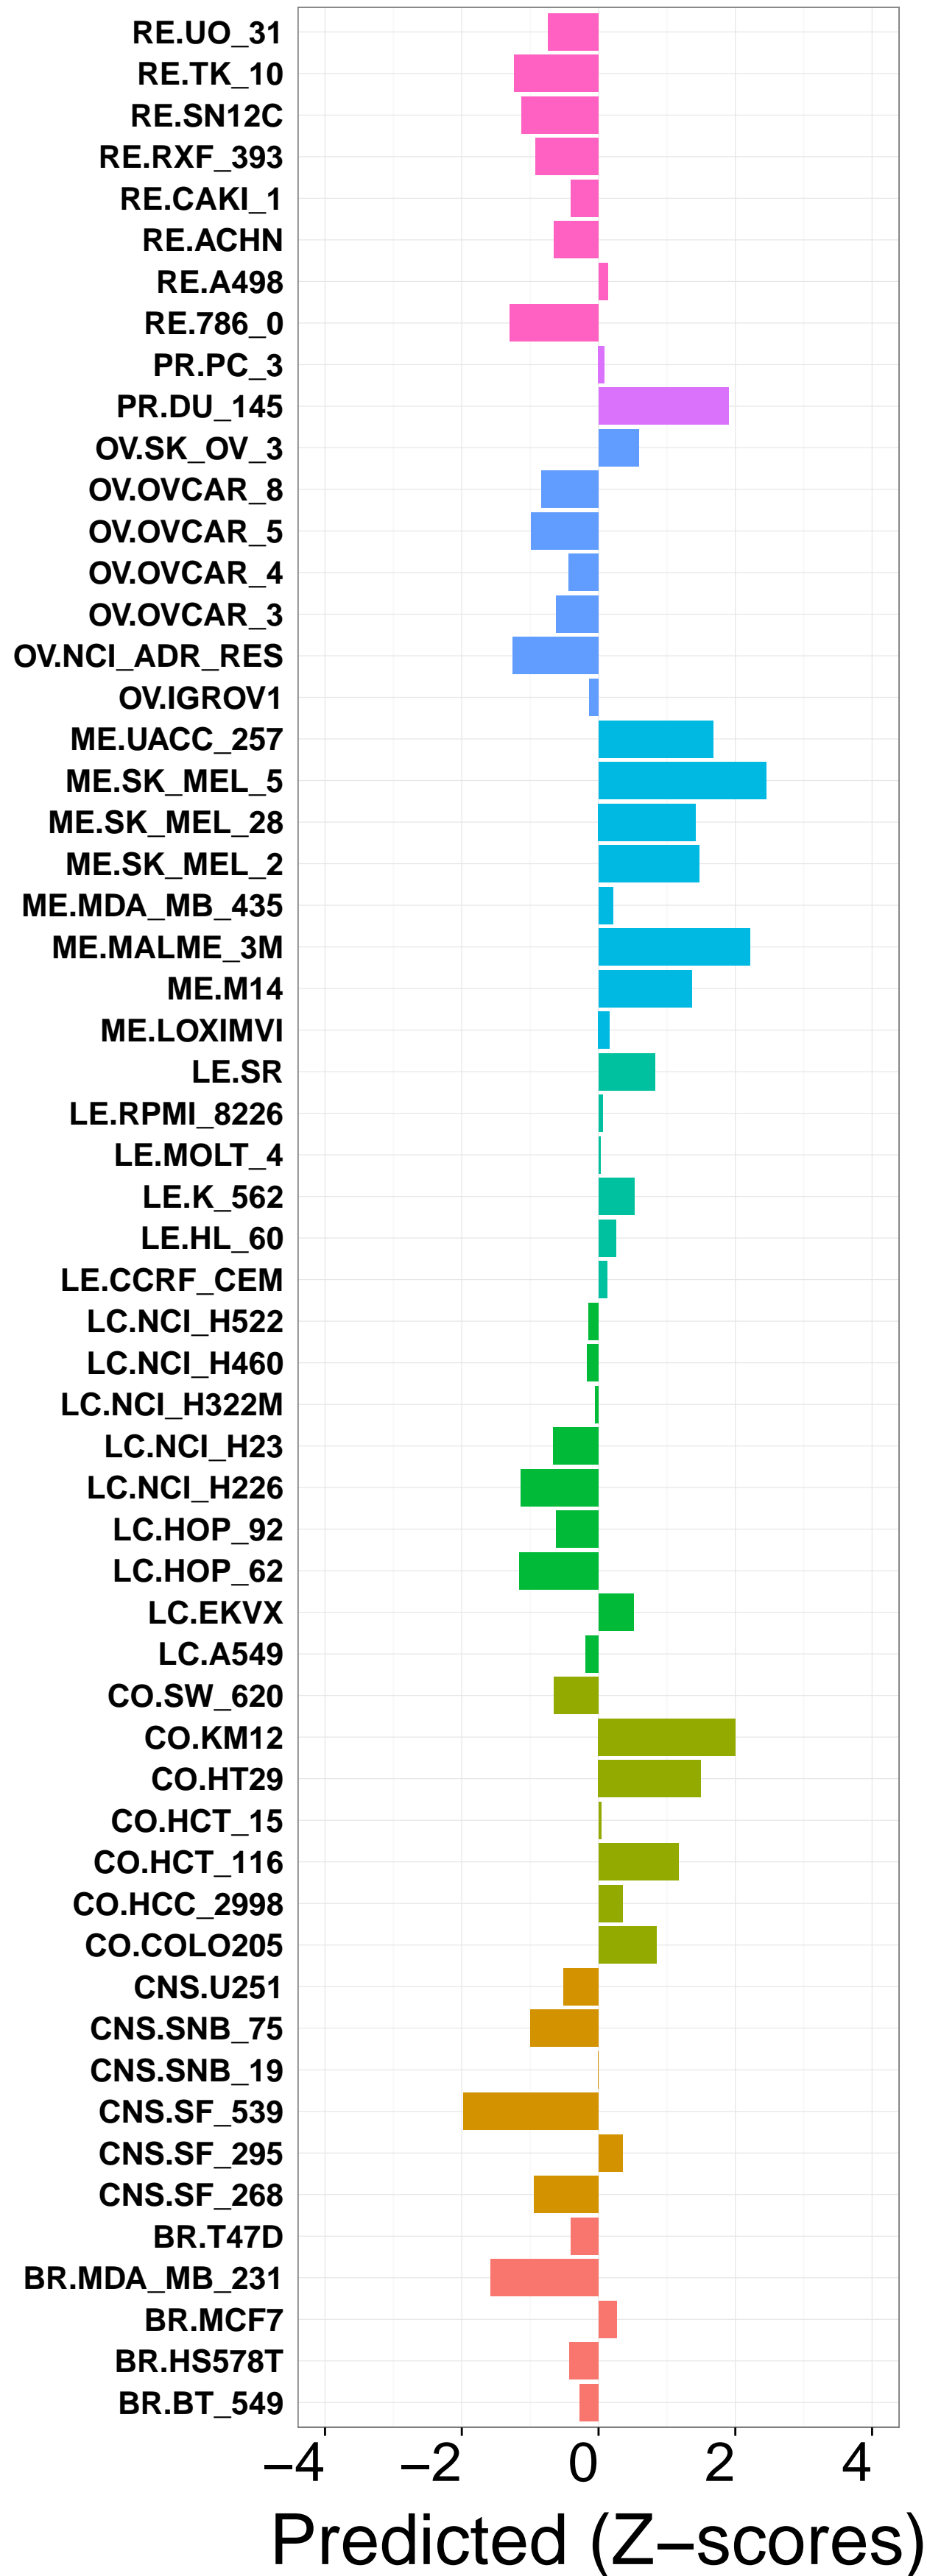

# NSC 715055, Gefitinib (LOTO)

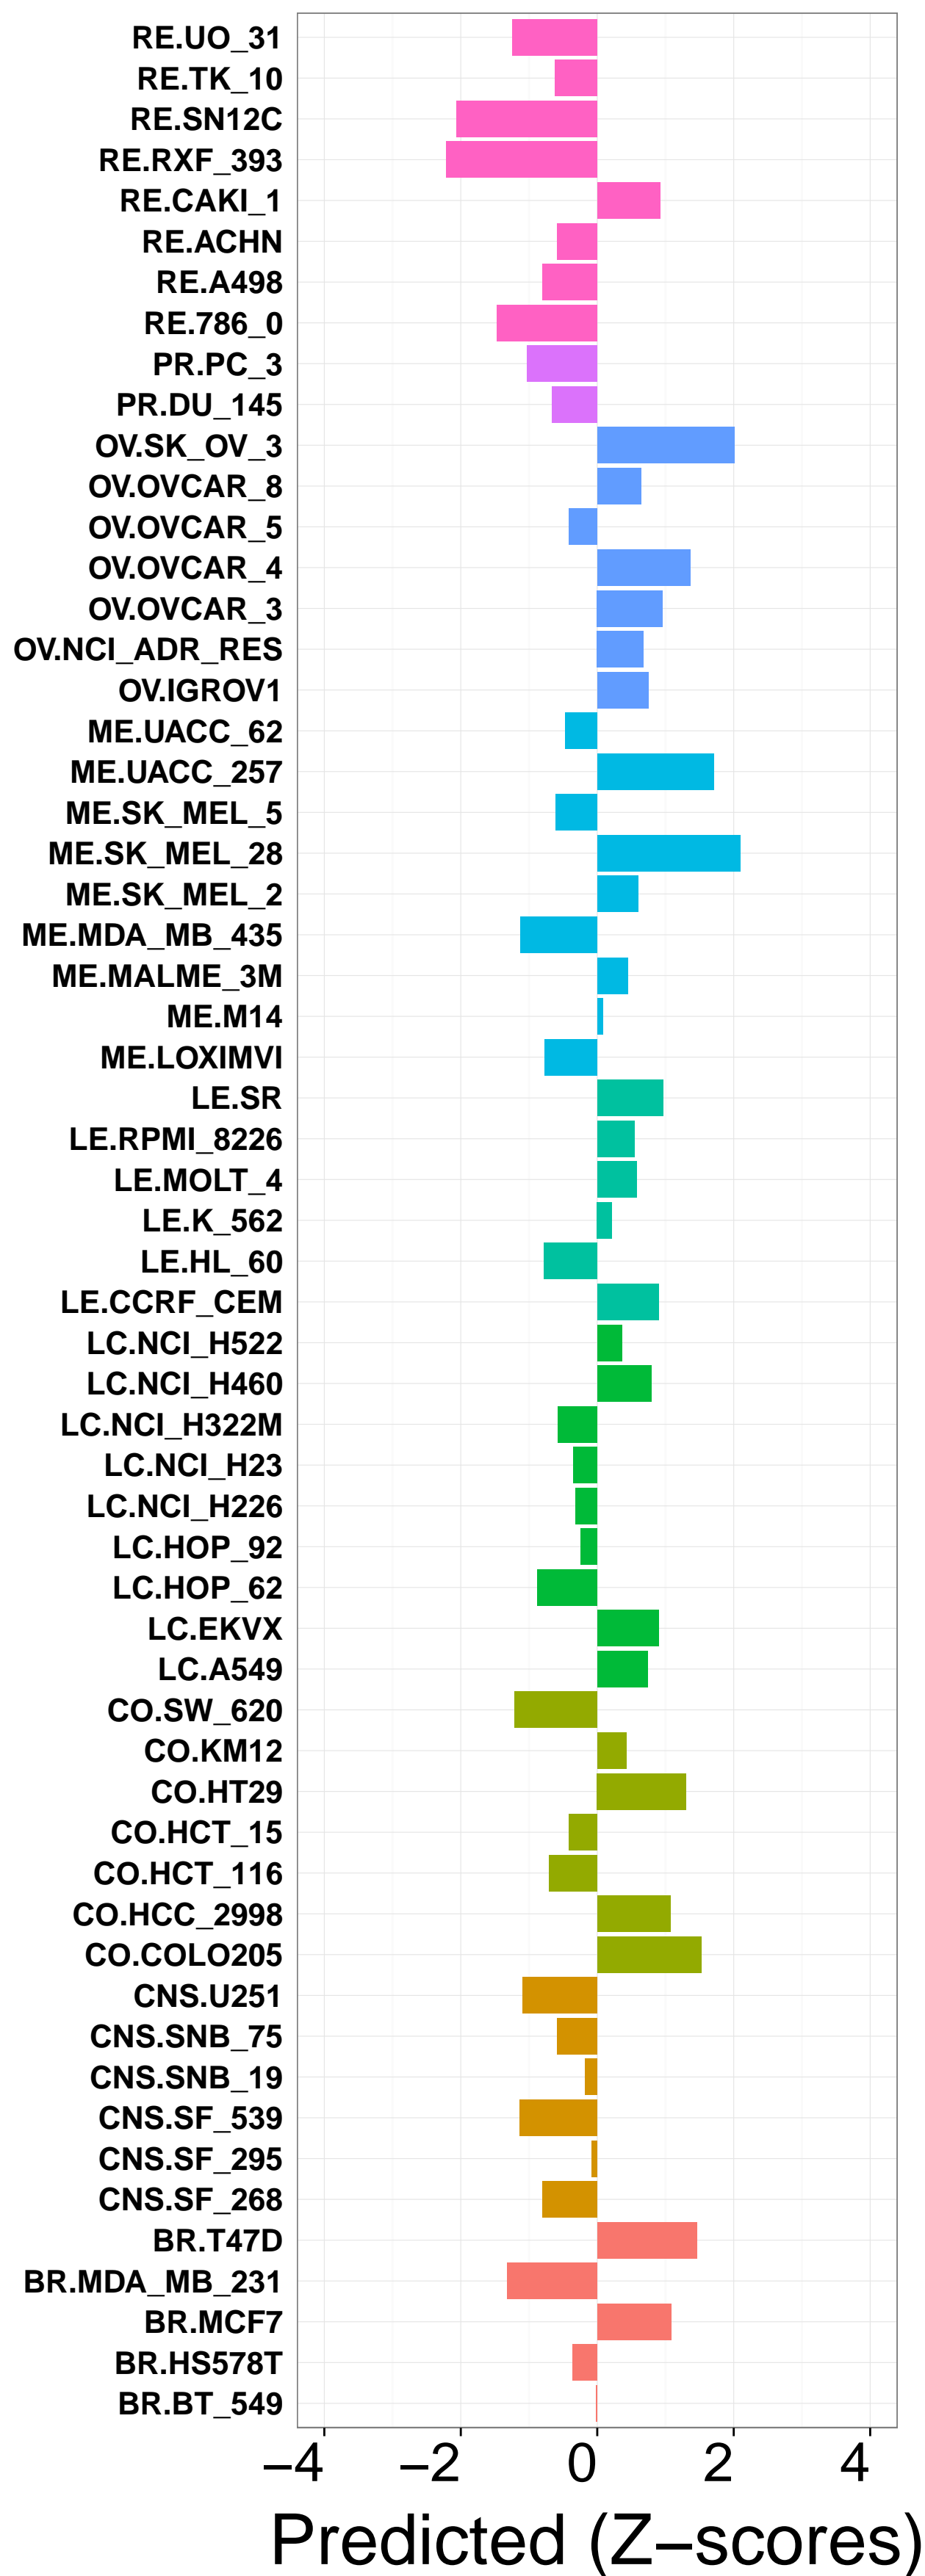

# NSC 718781, (LOTO)

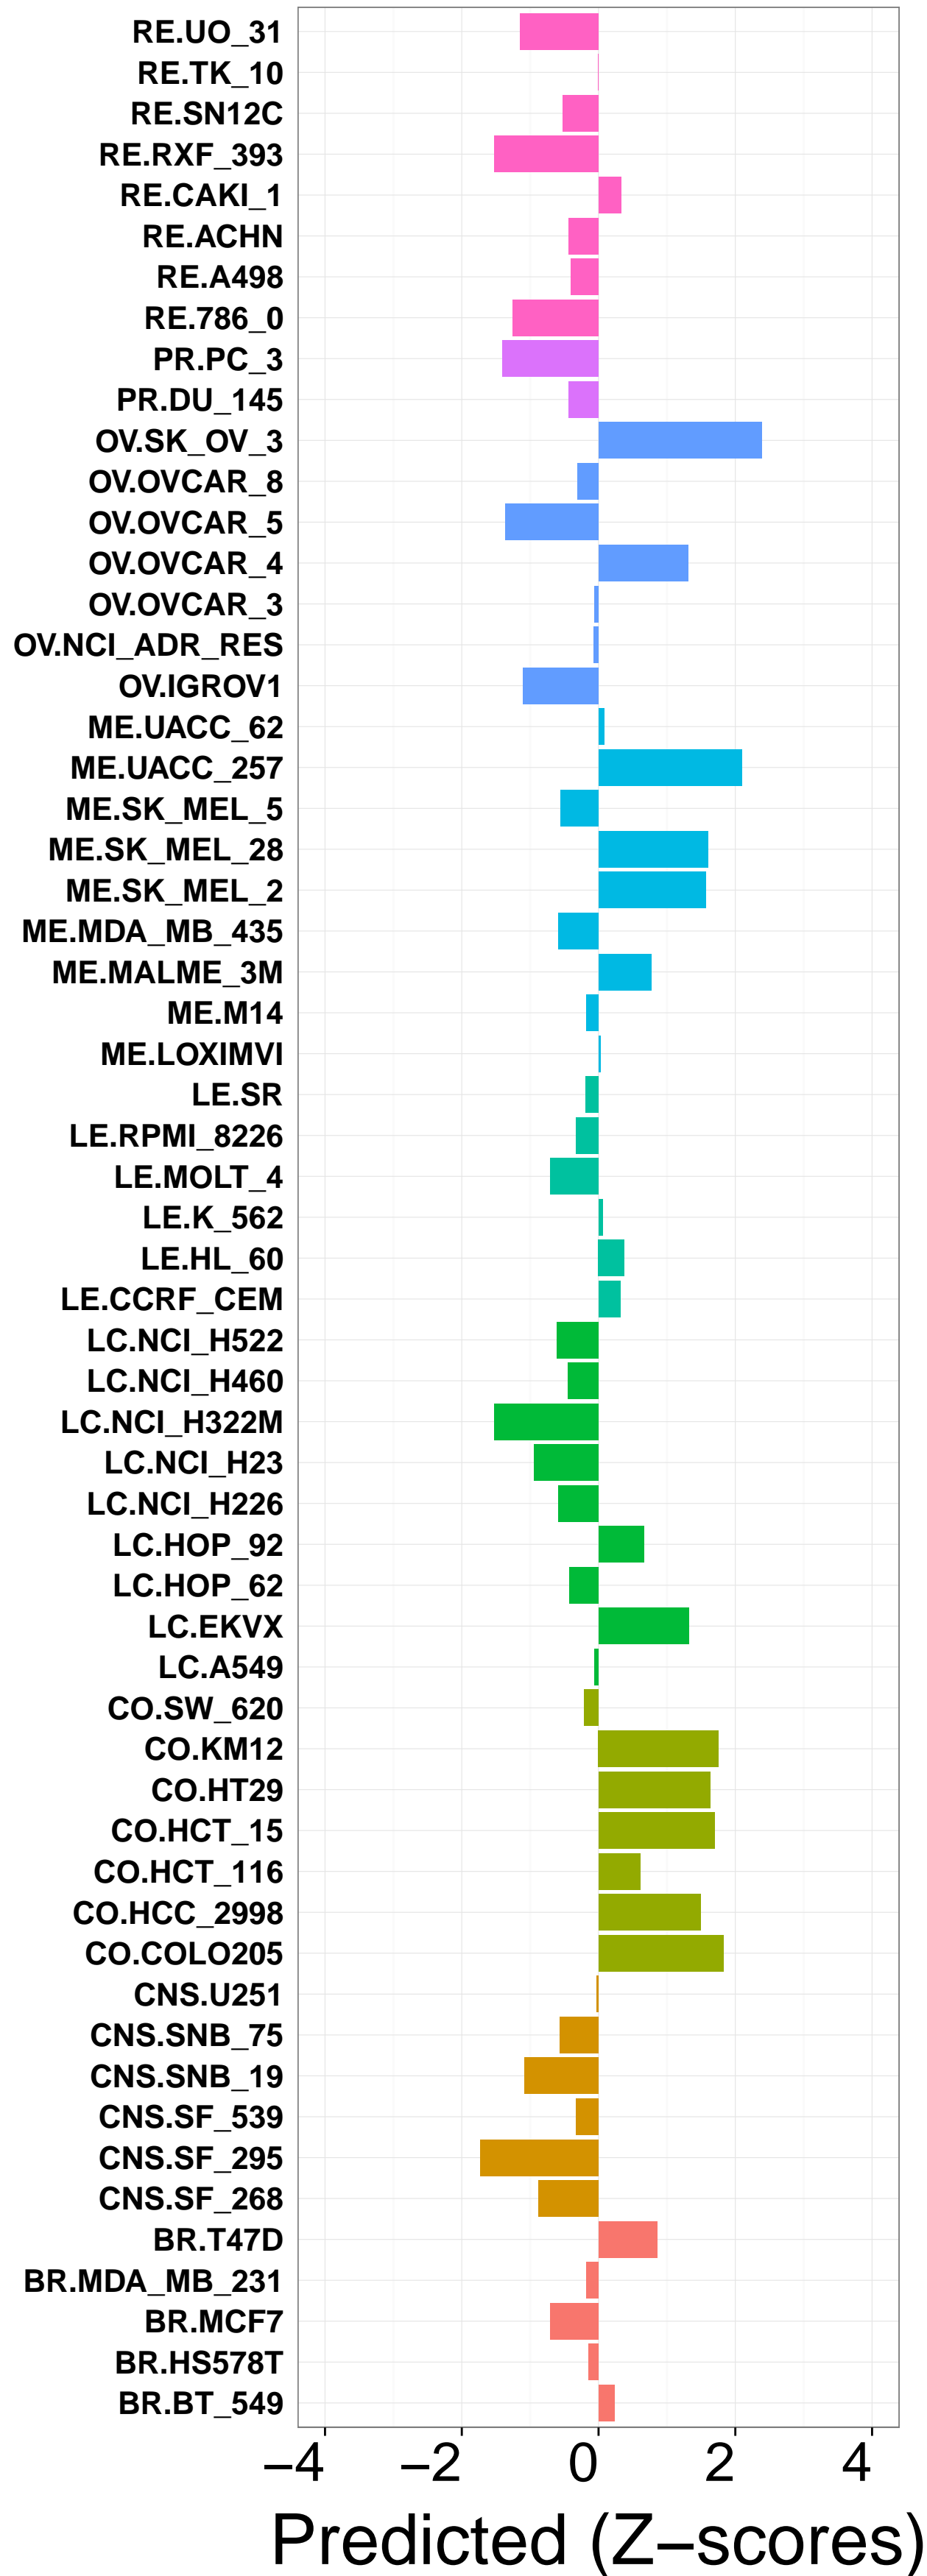

# NSC 719239, (LOTO)

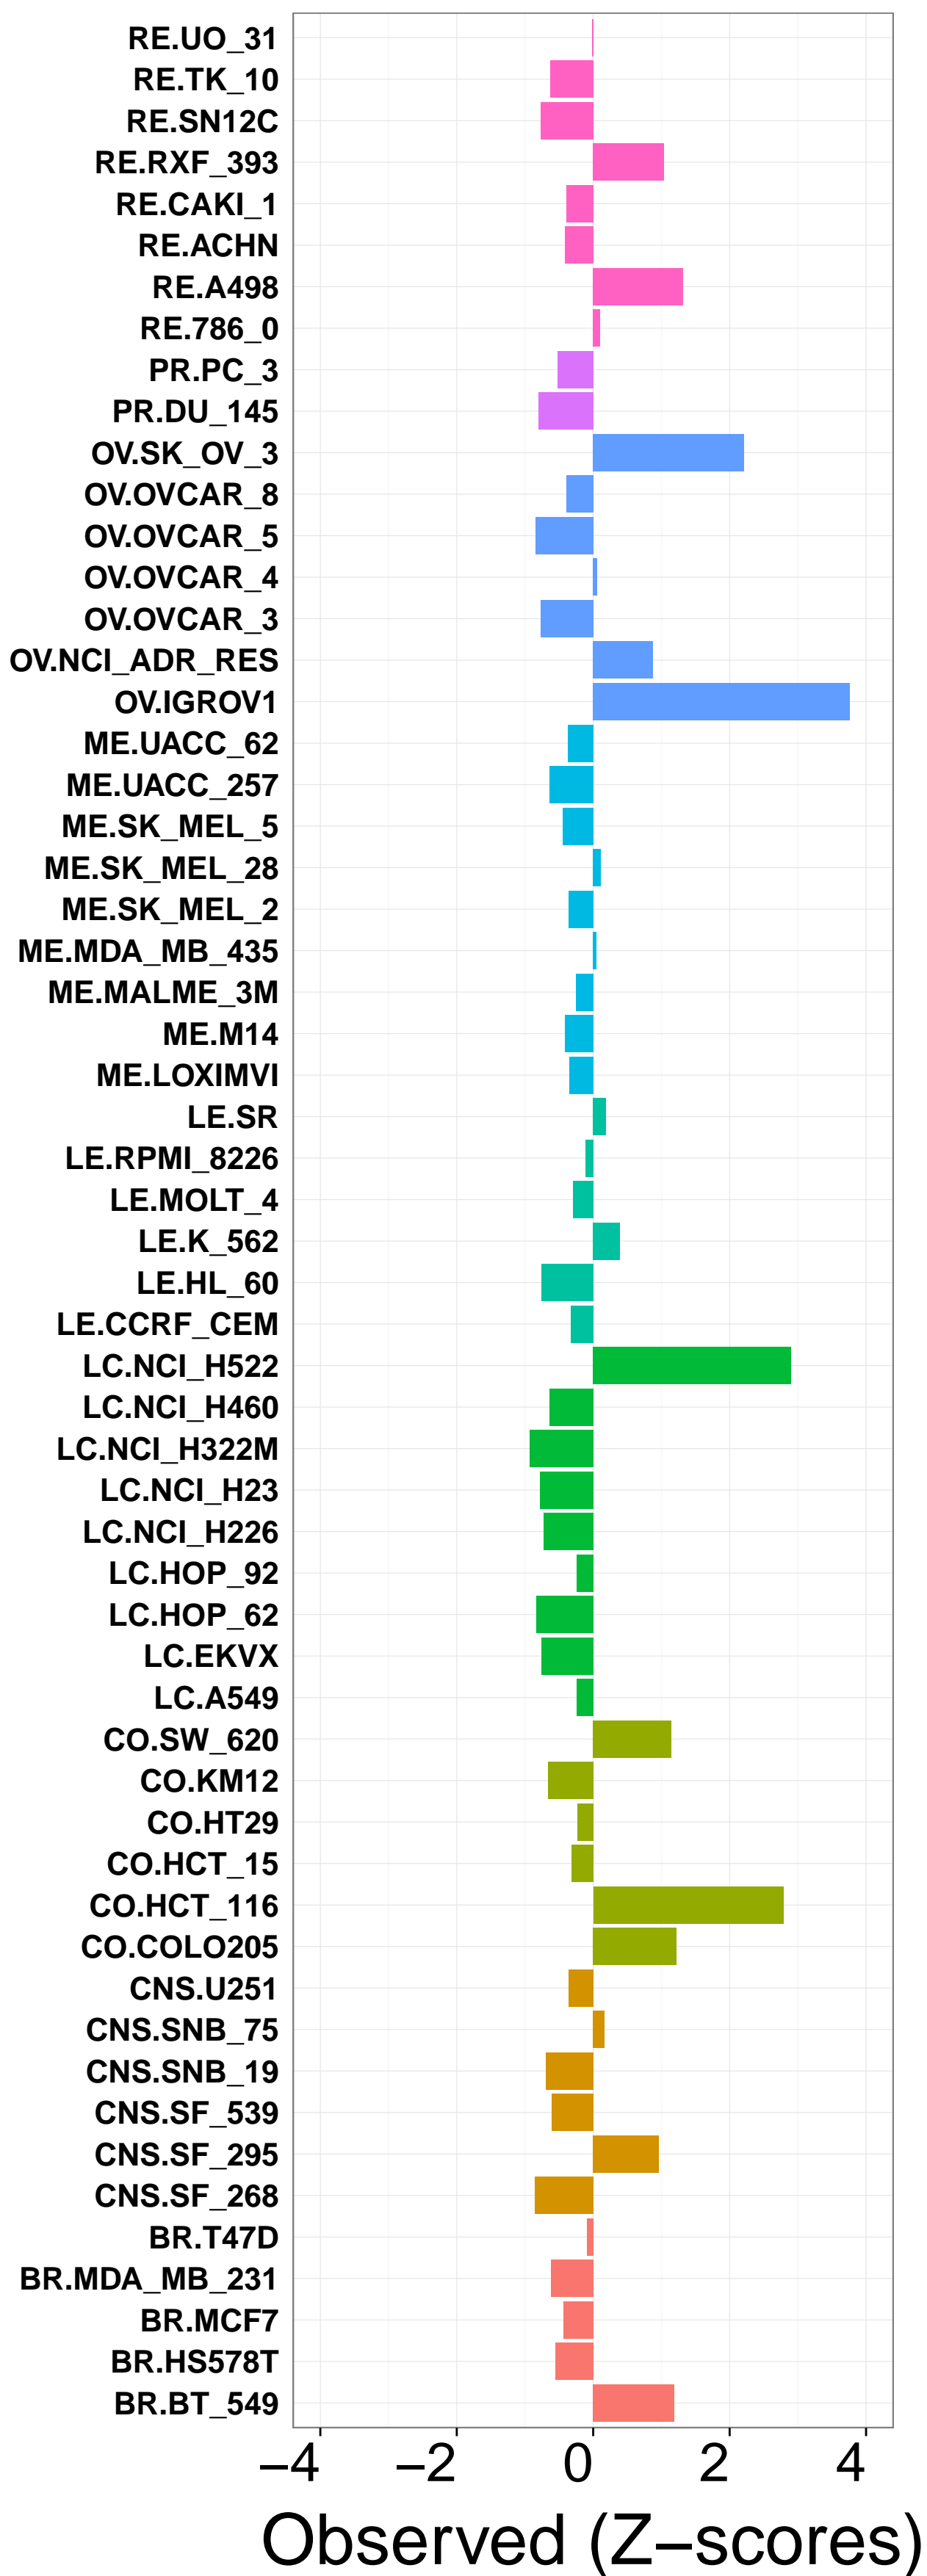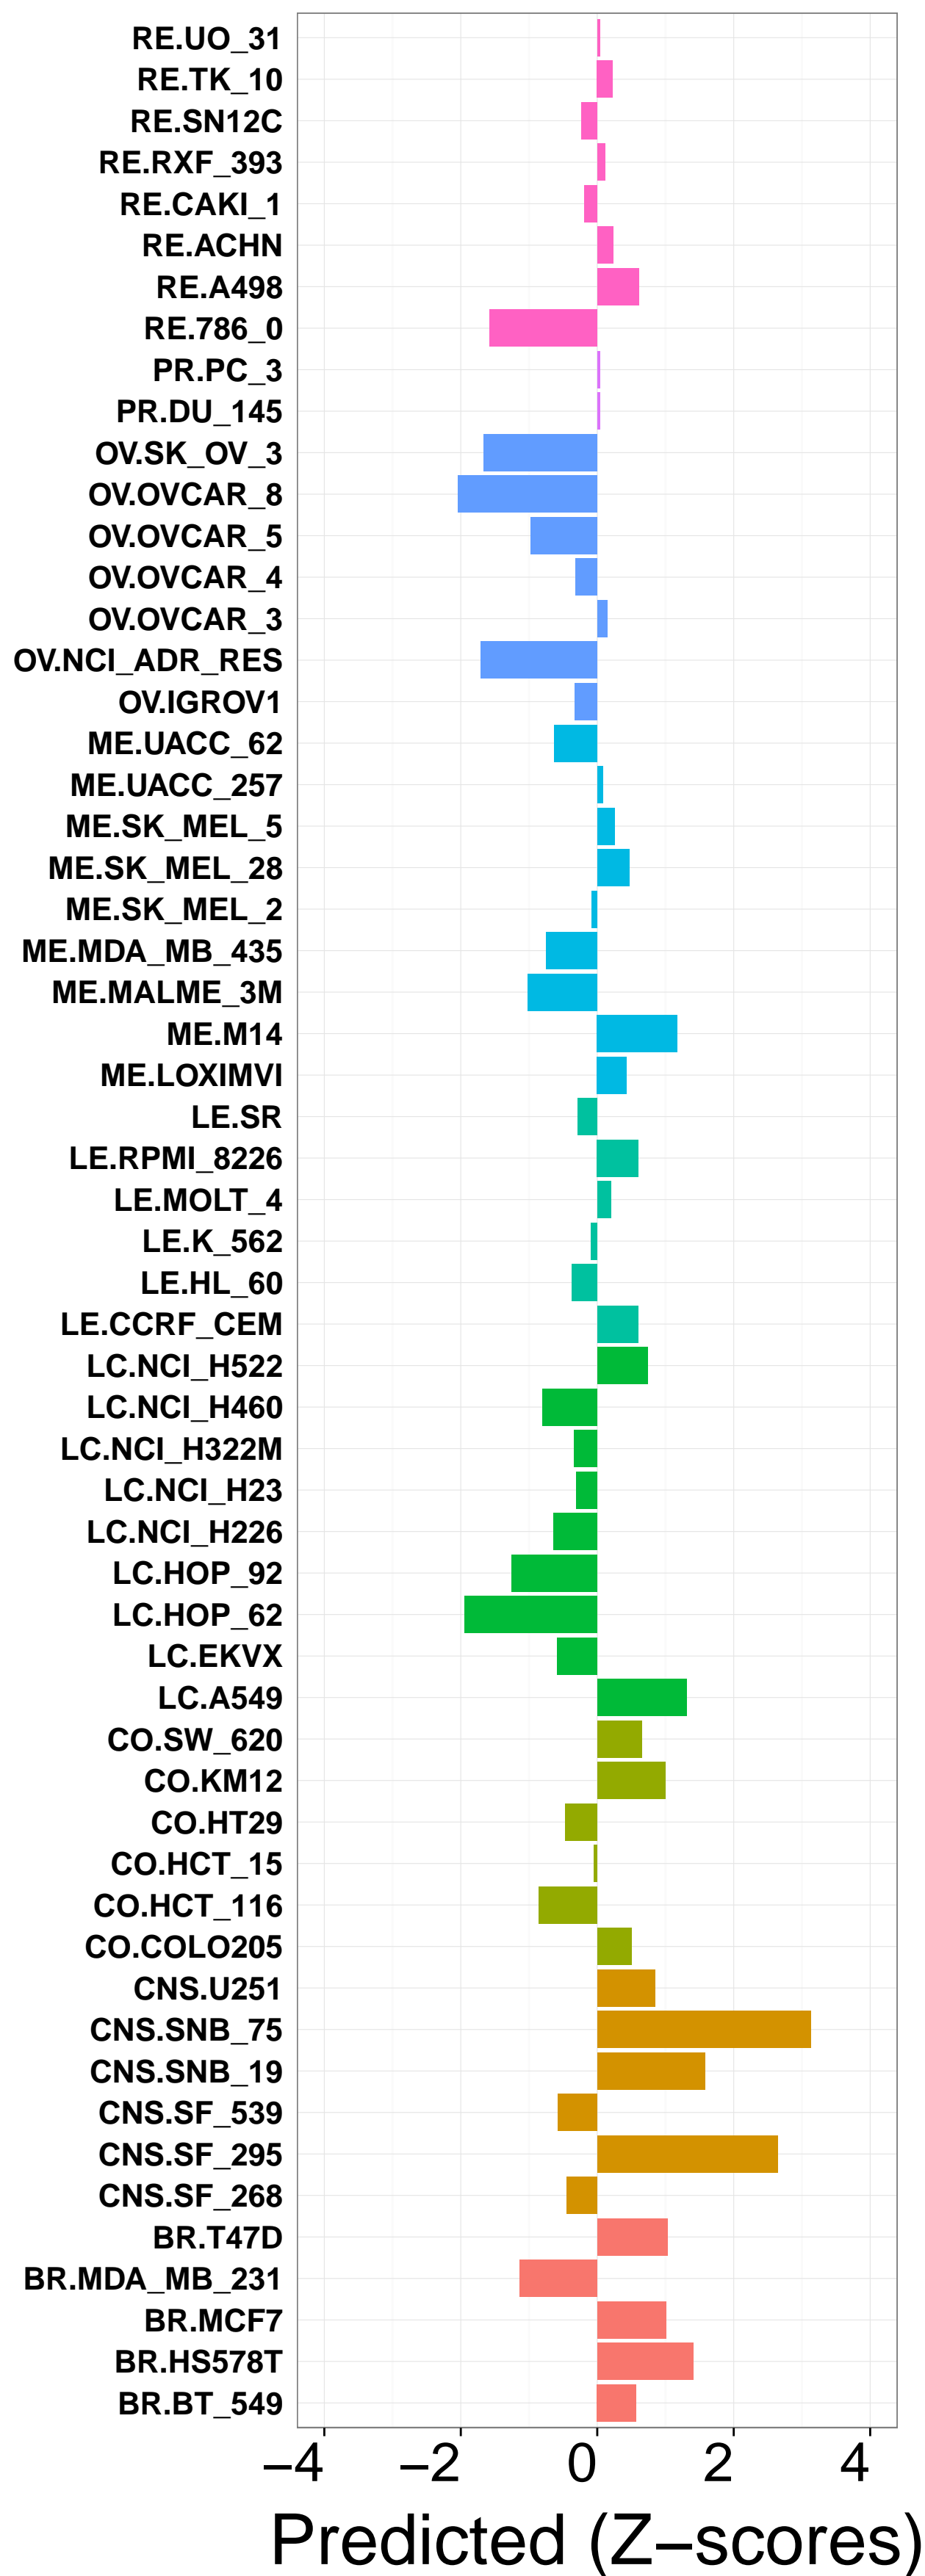



# NSC 724998, (LOTO)

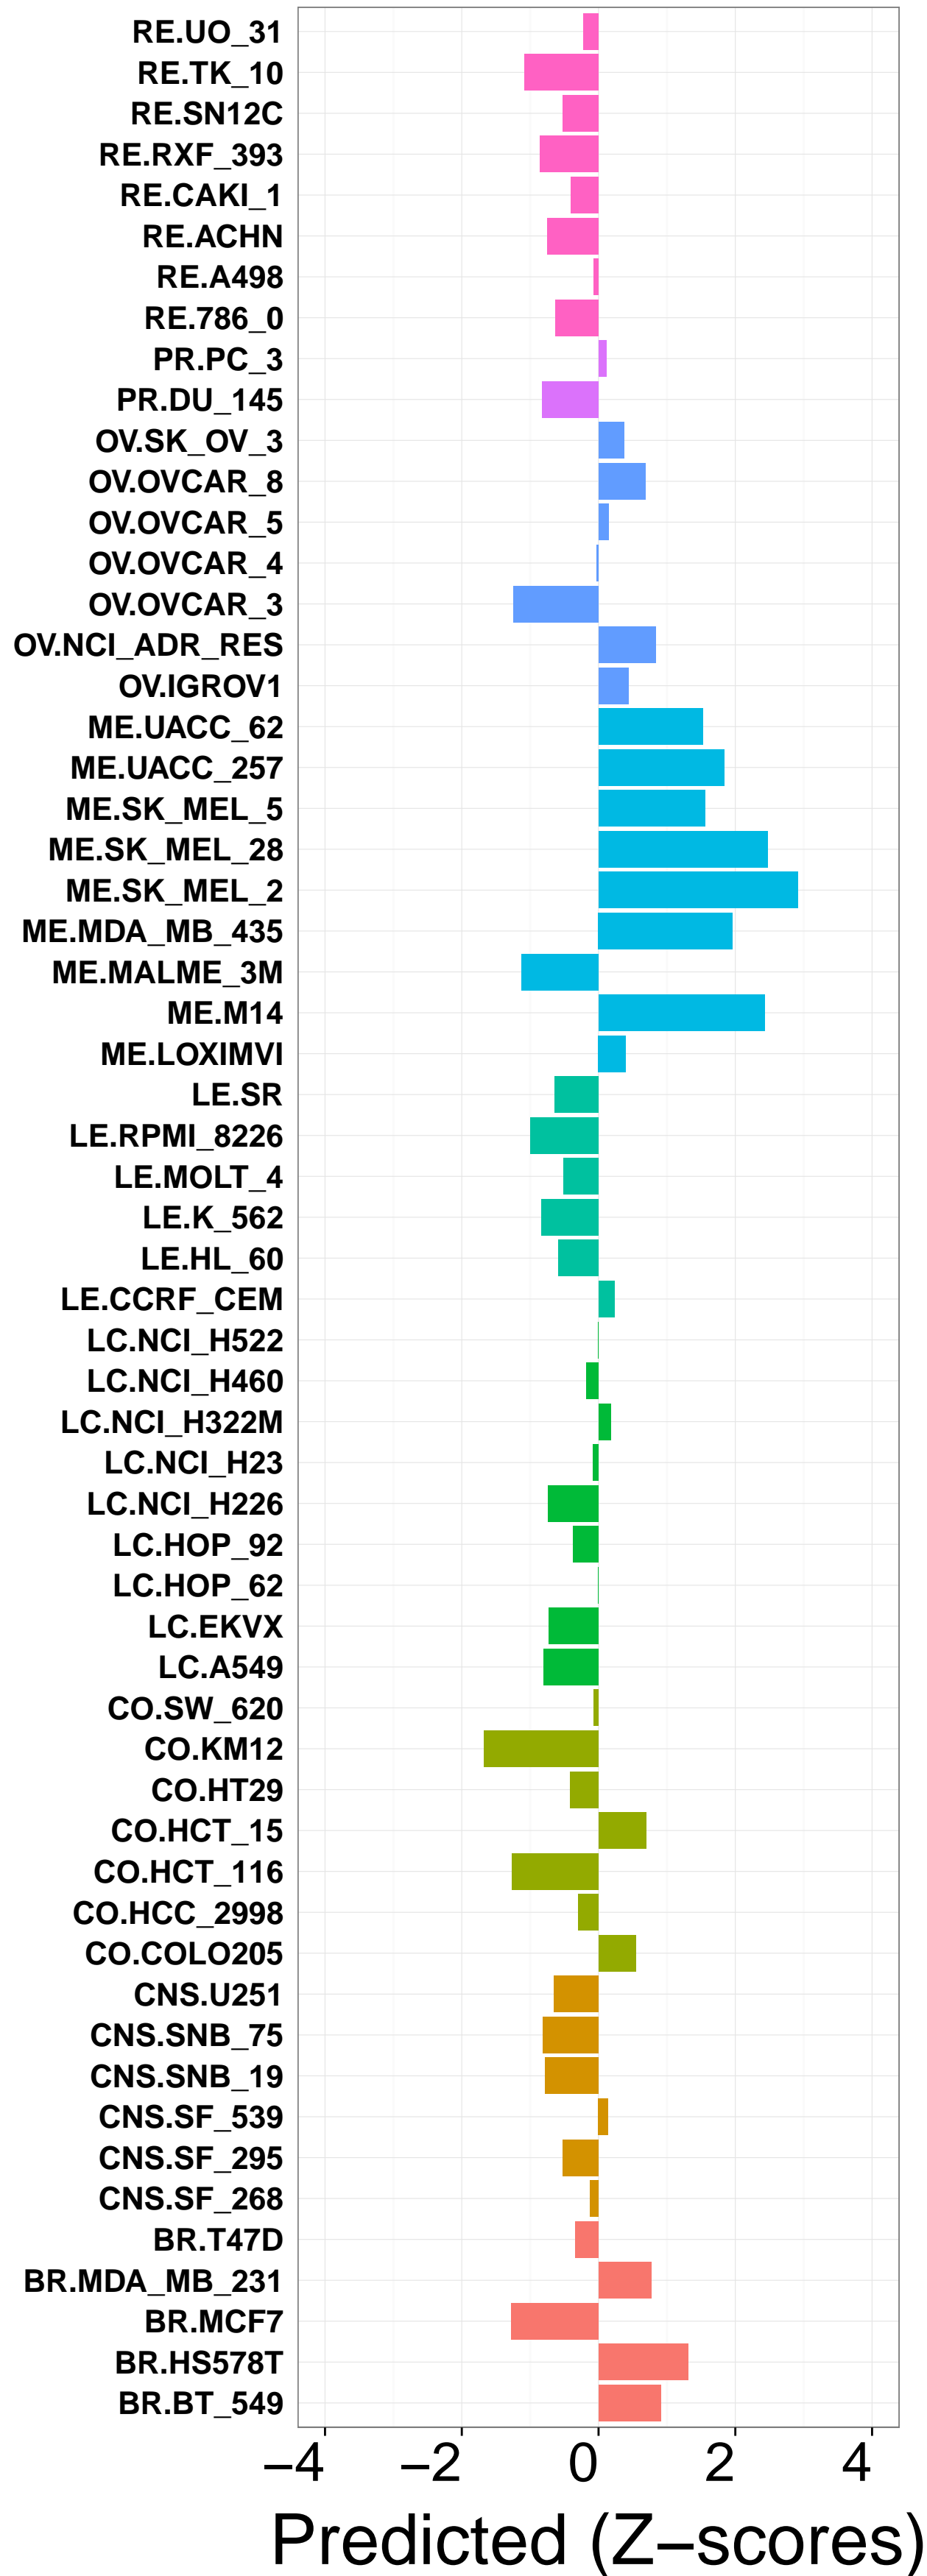

# NSC 725776, (LOTO)

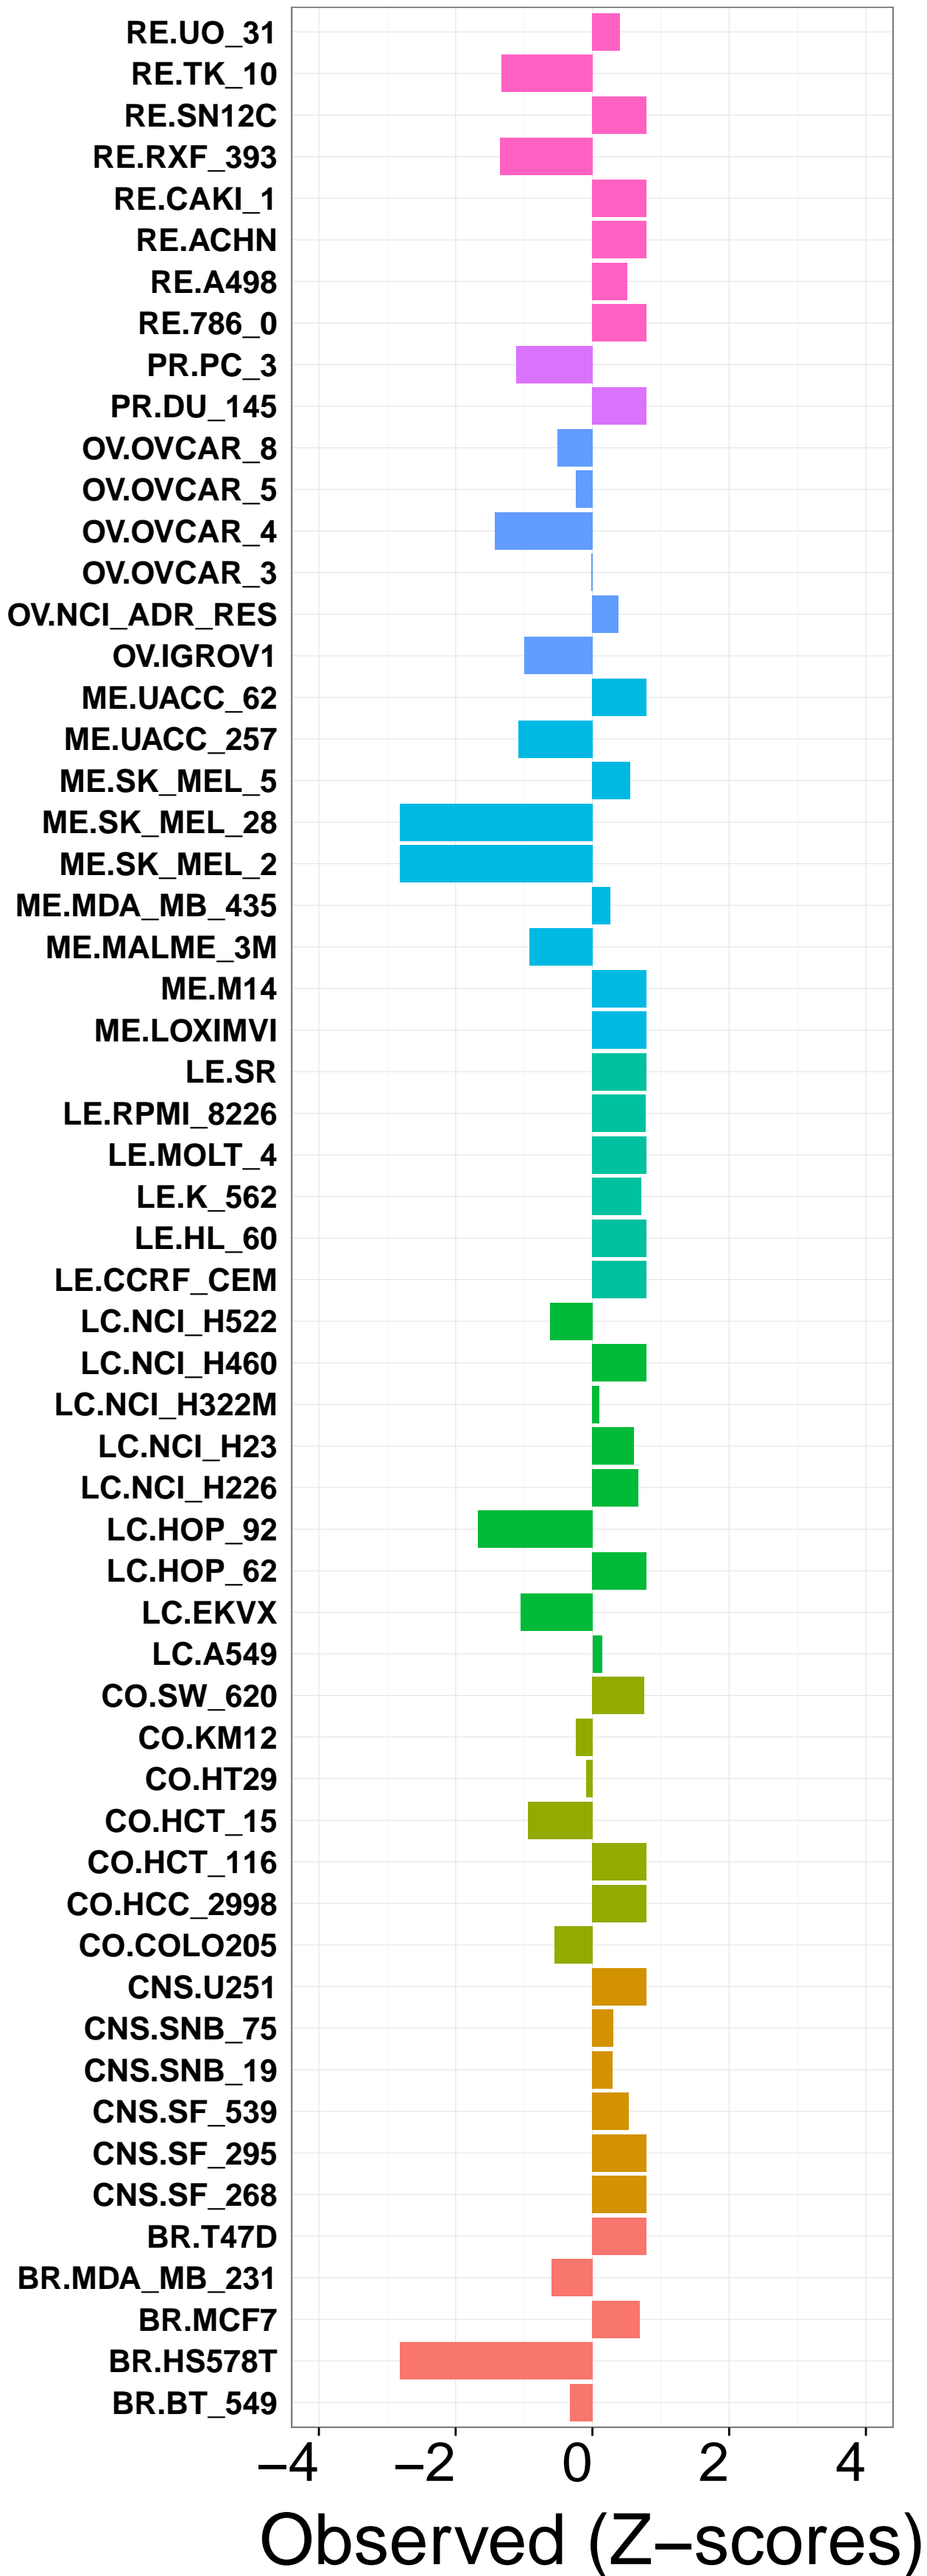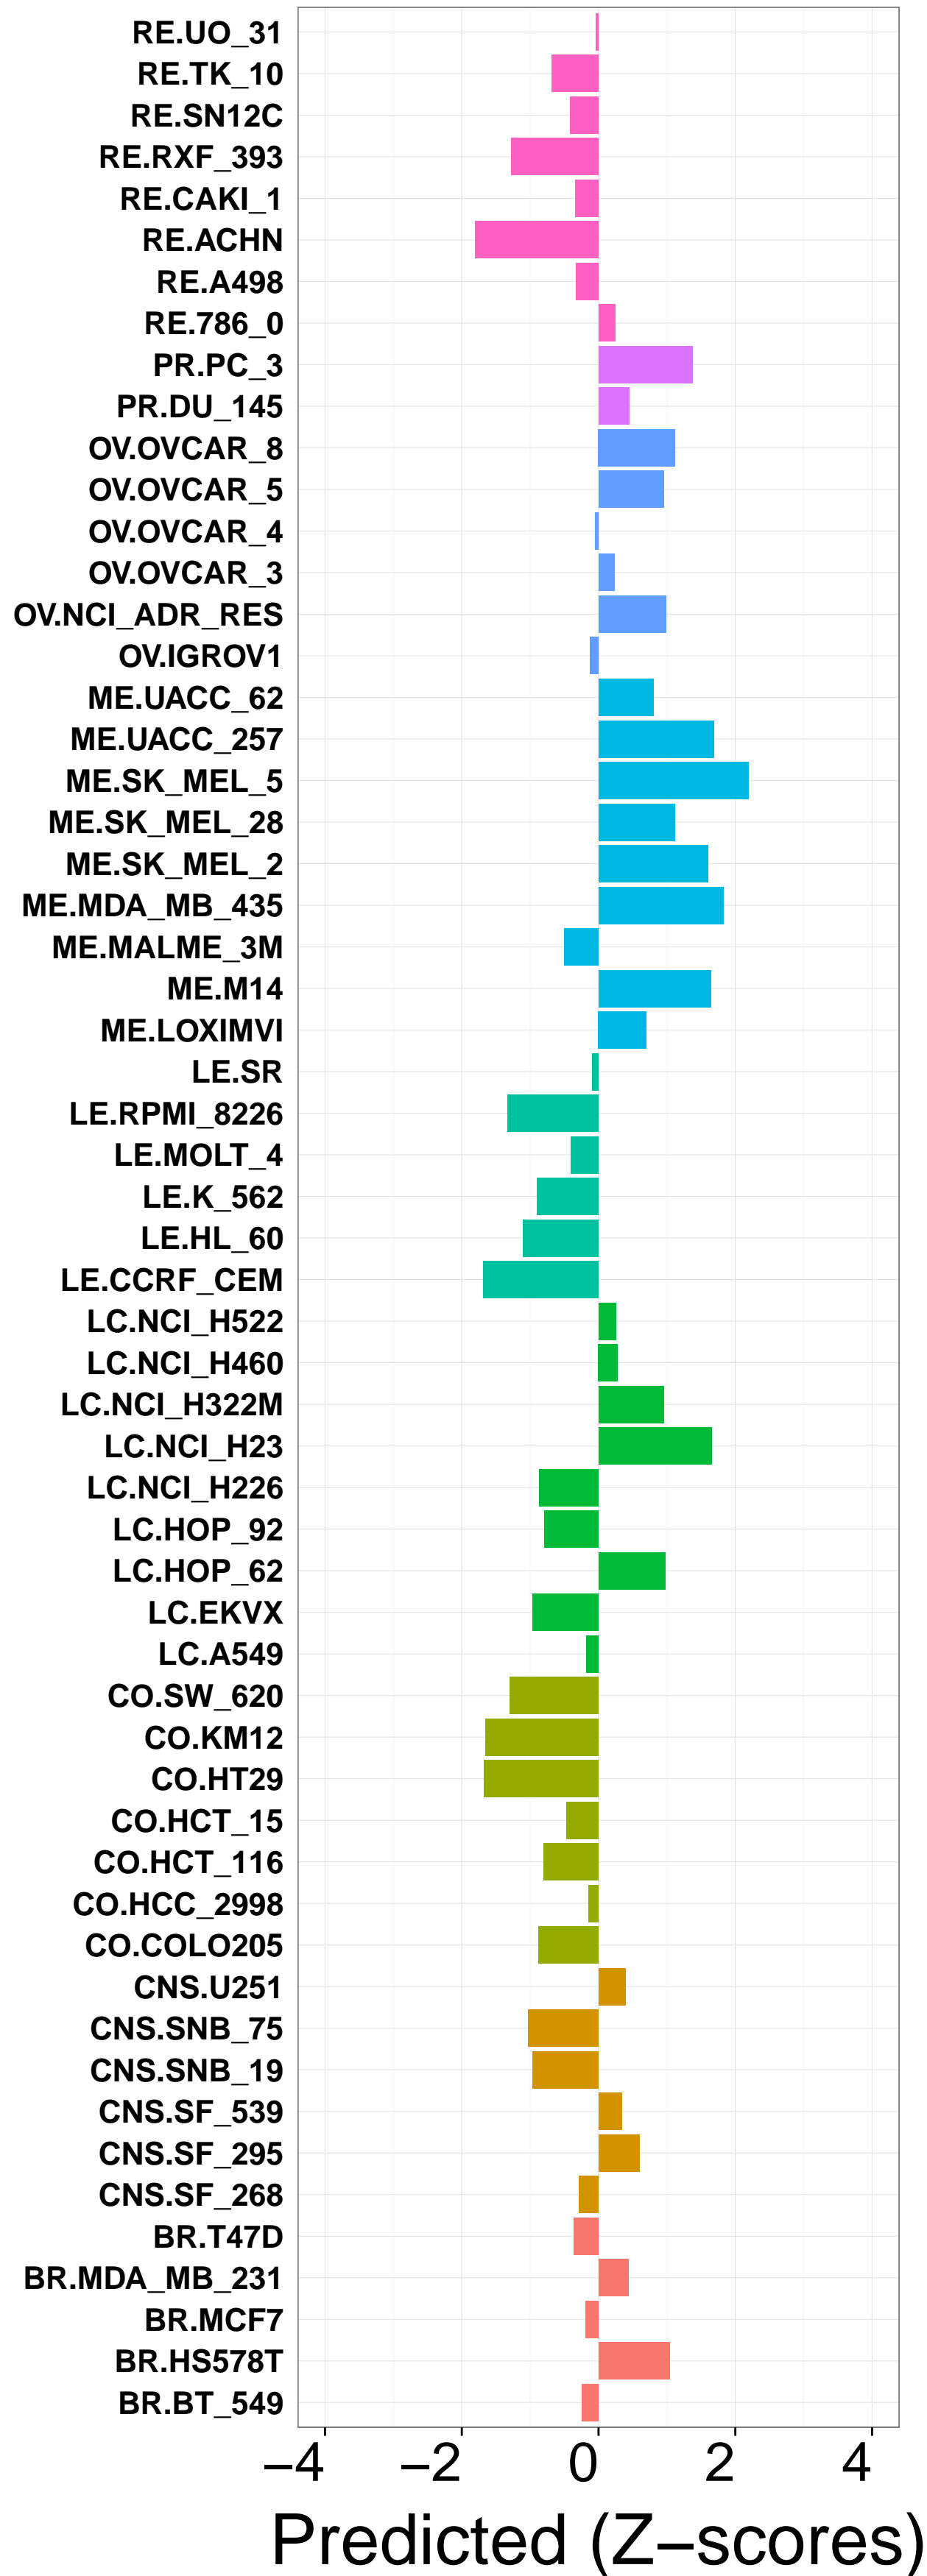

# NSC 726630, (LOTO)

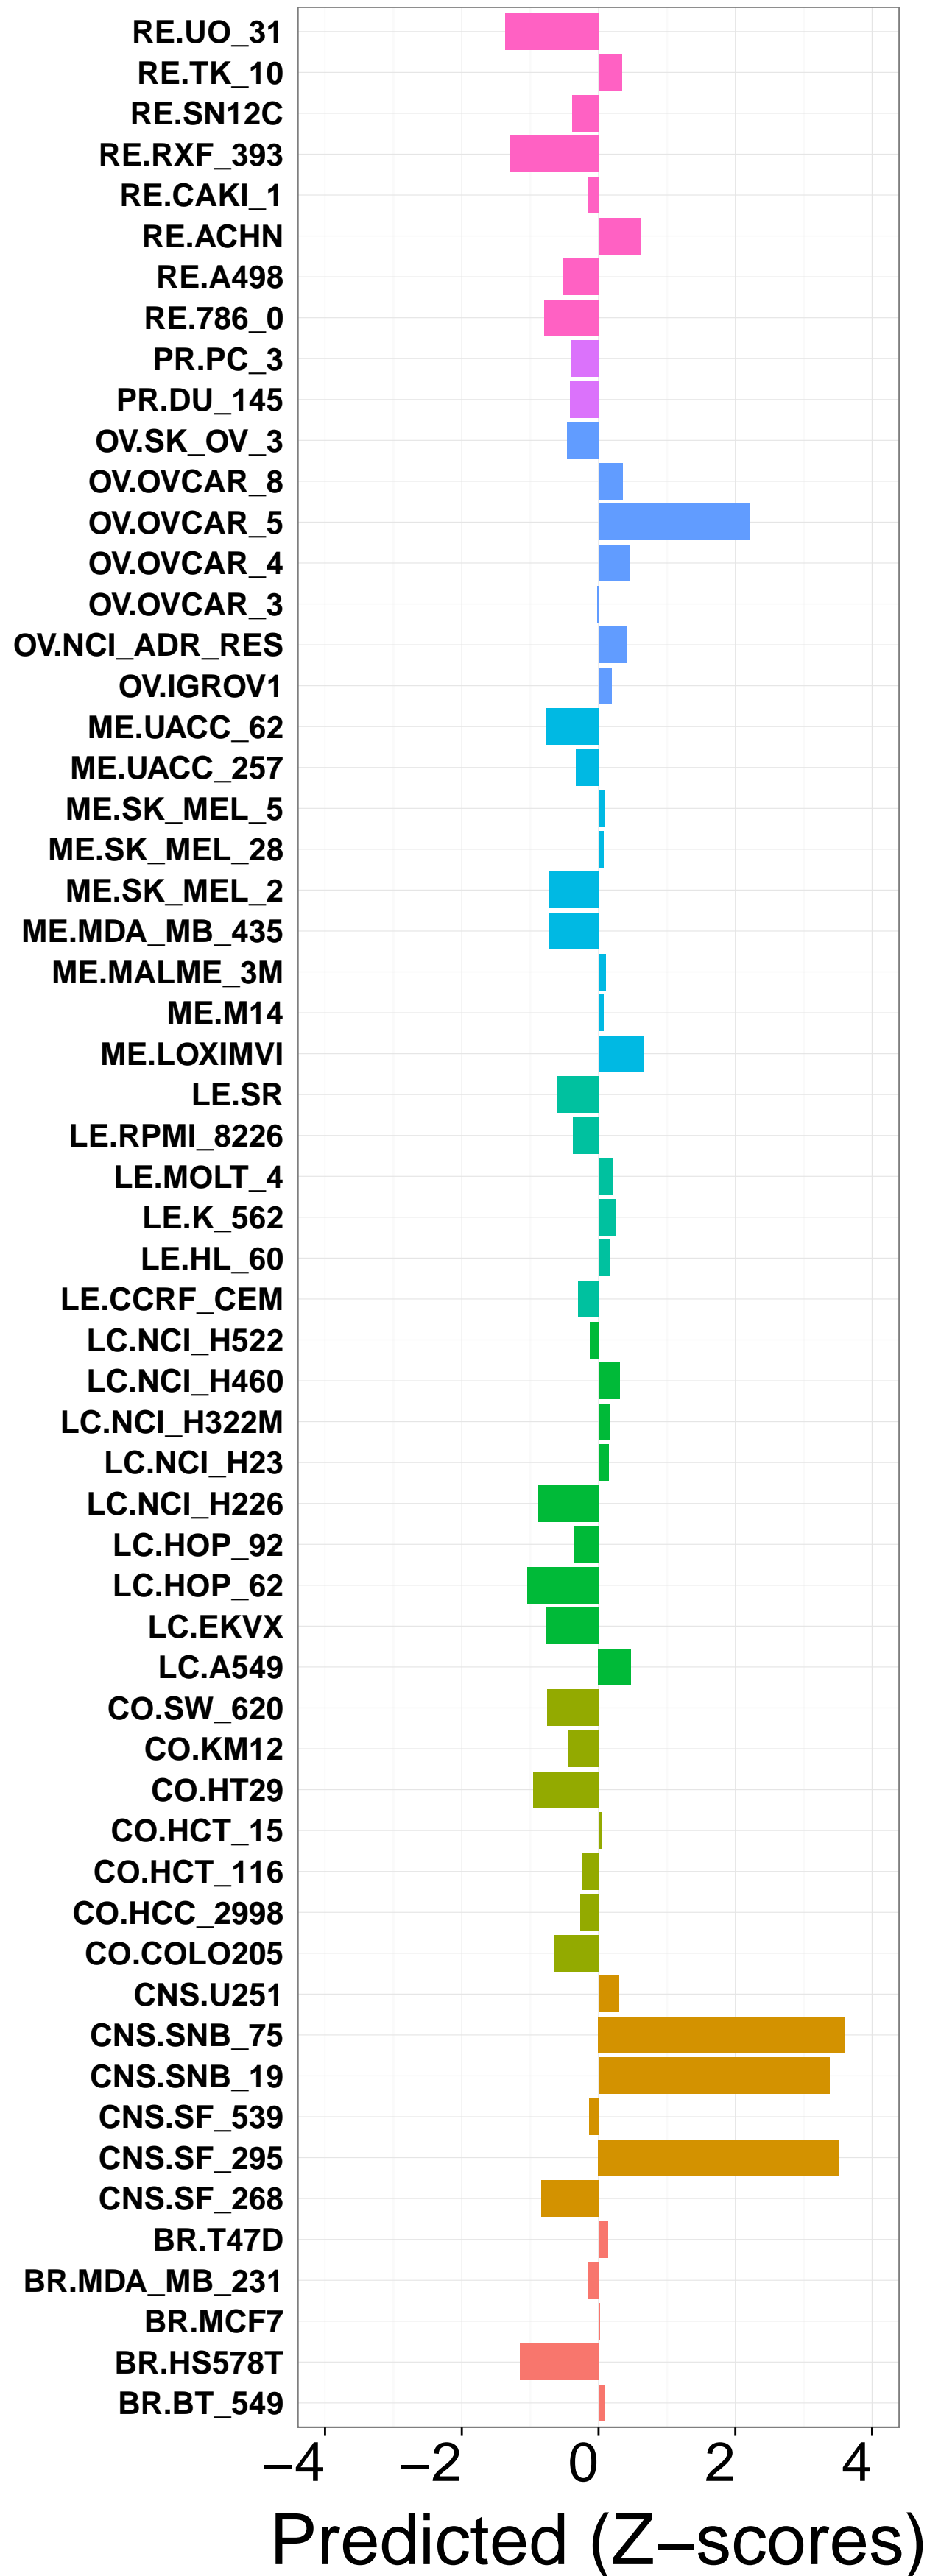

# NSC 728073, (LOTO)

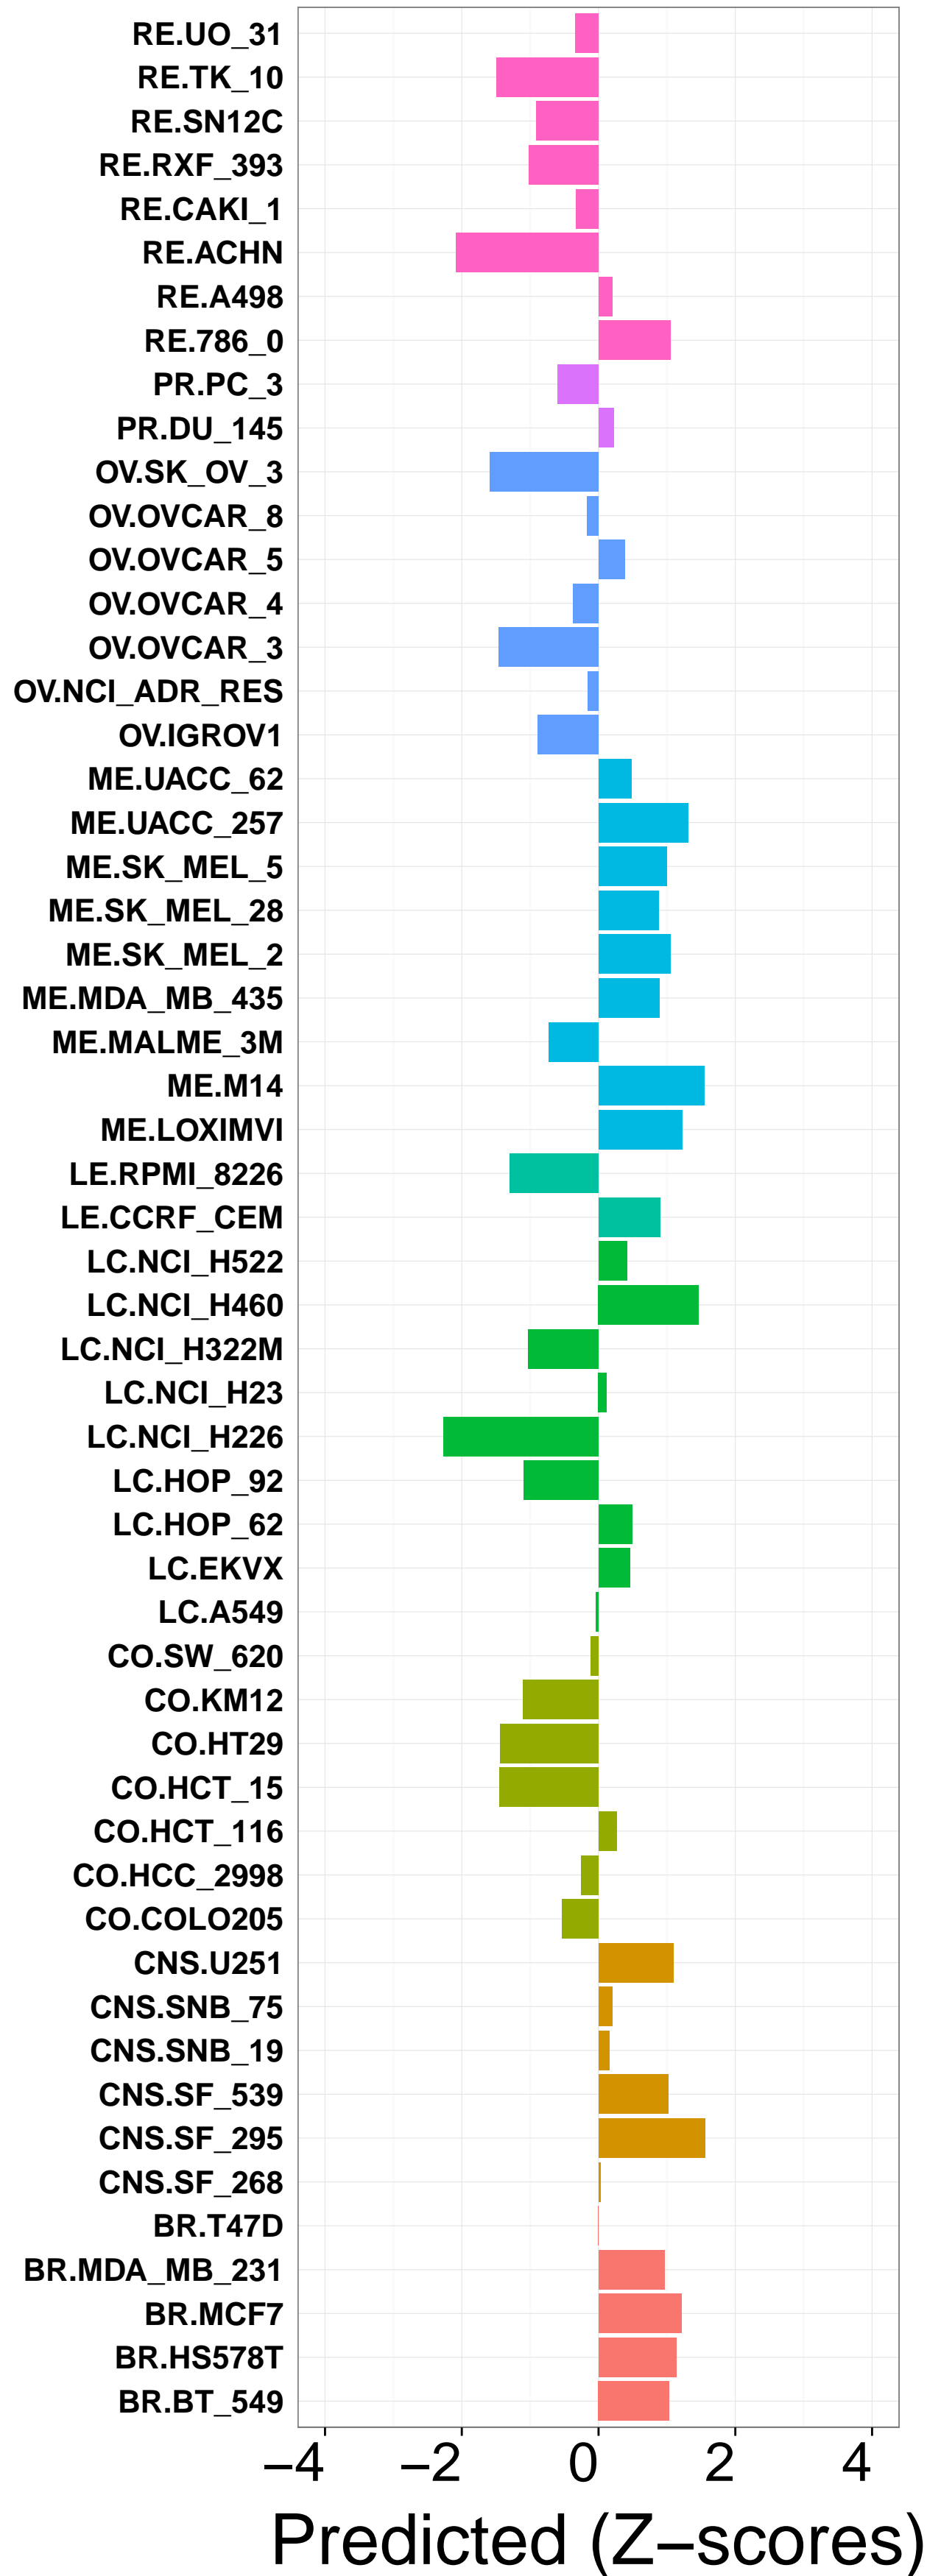

# NSC 732517, (LOTO)

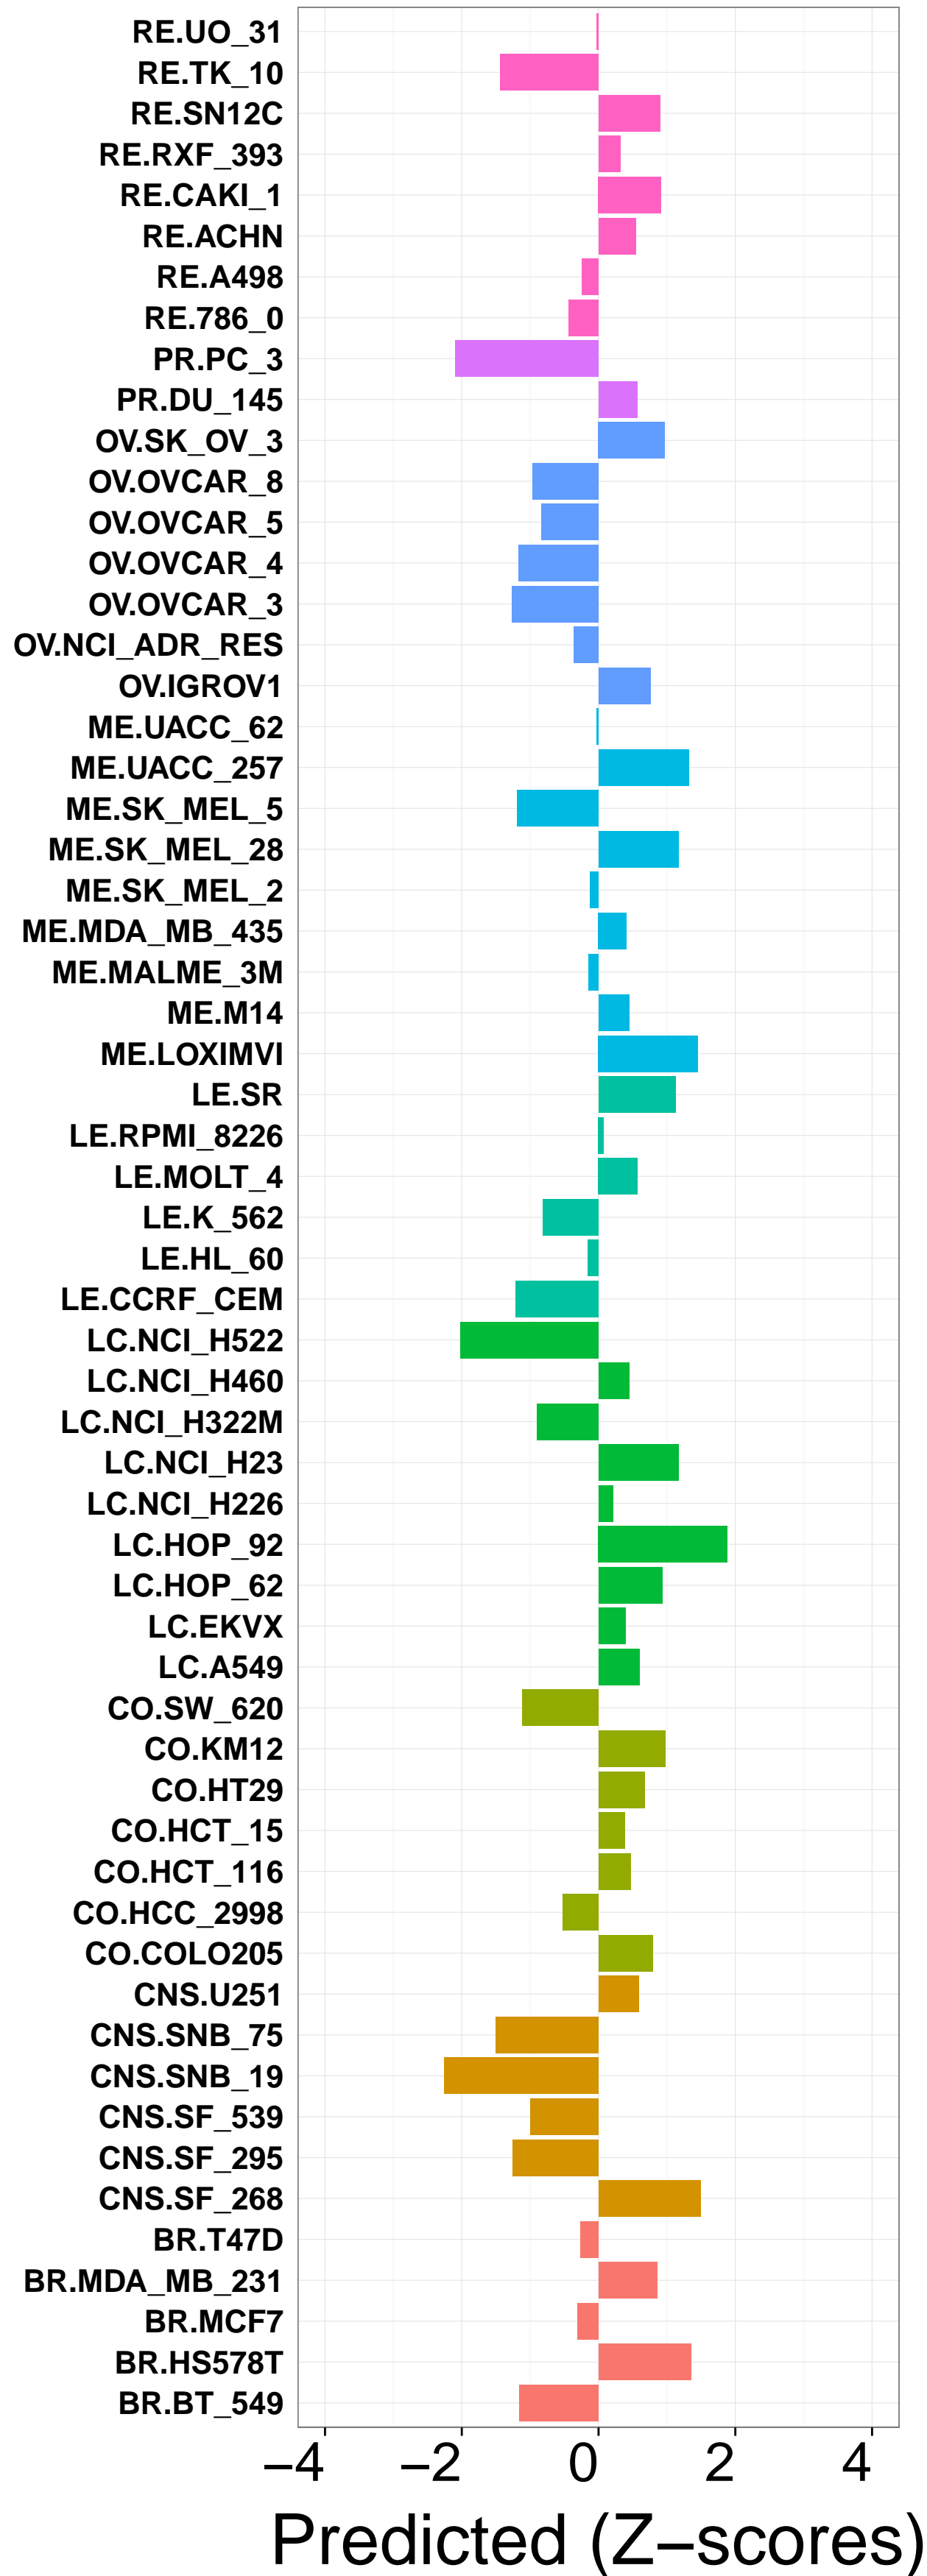



# NSC 740, Methotrexate (LOTO)

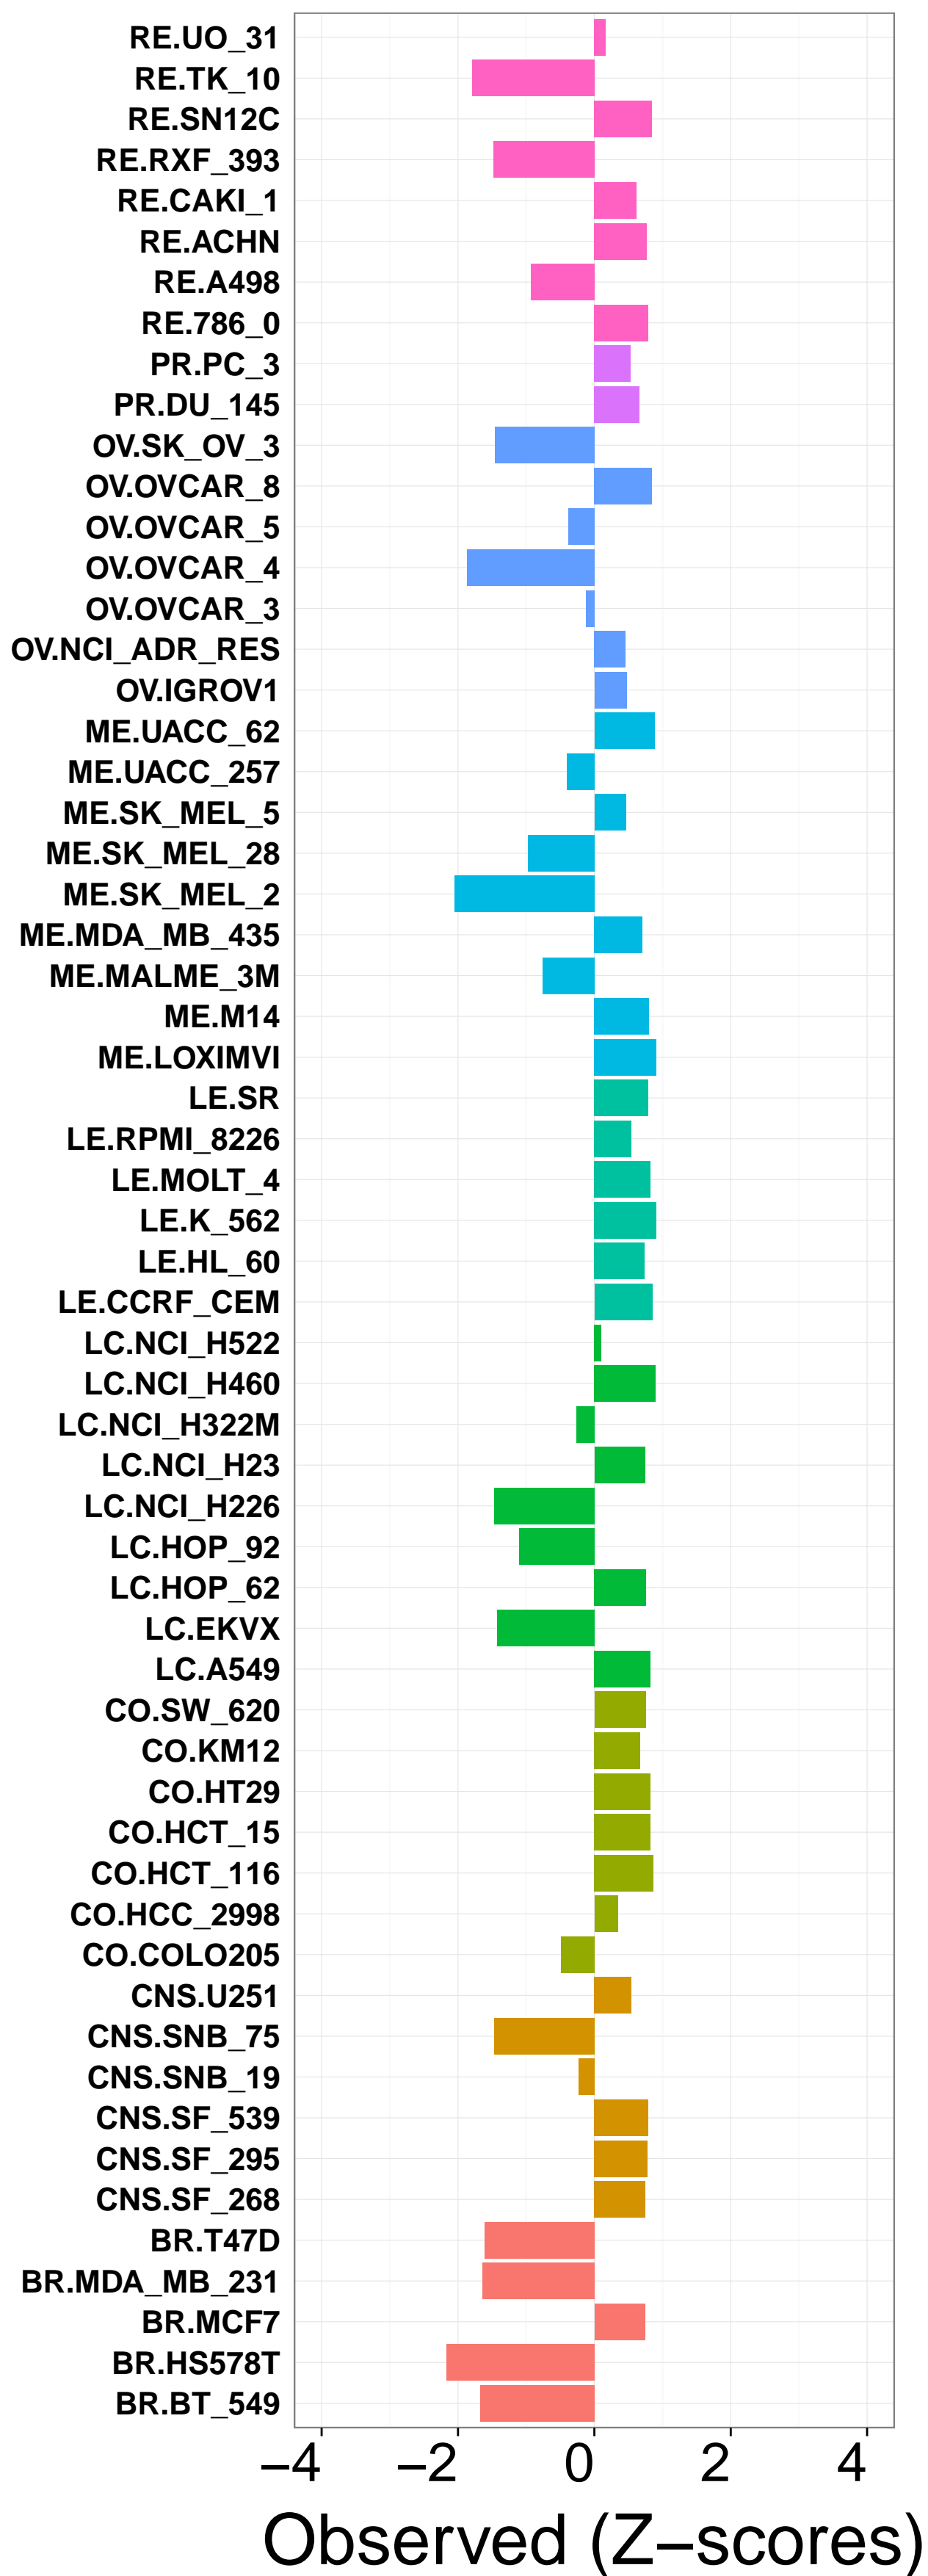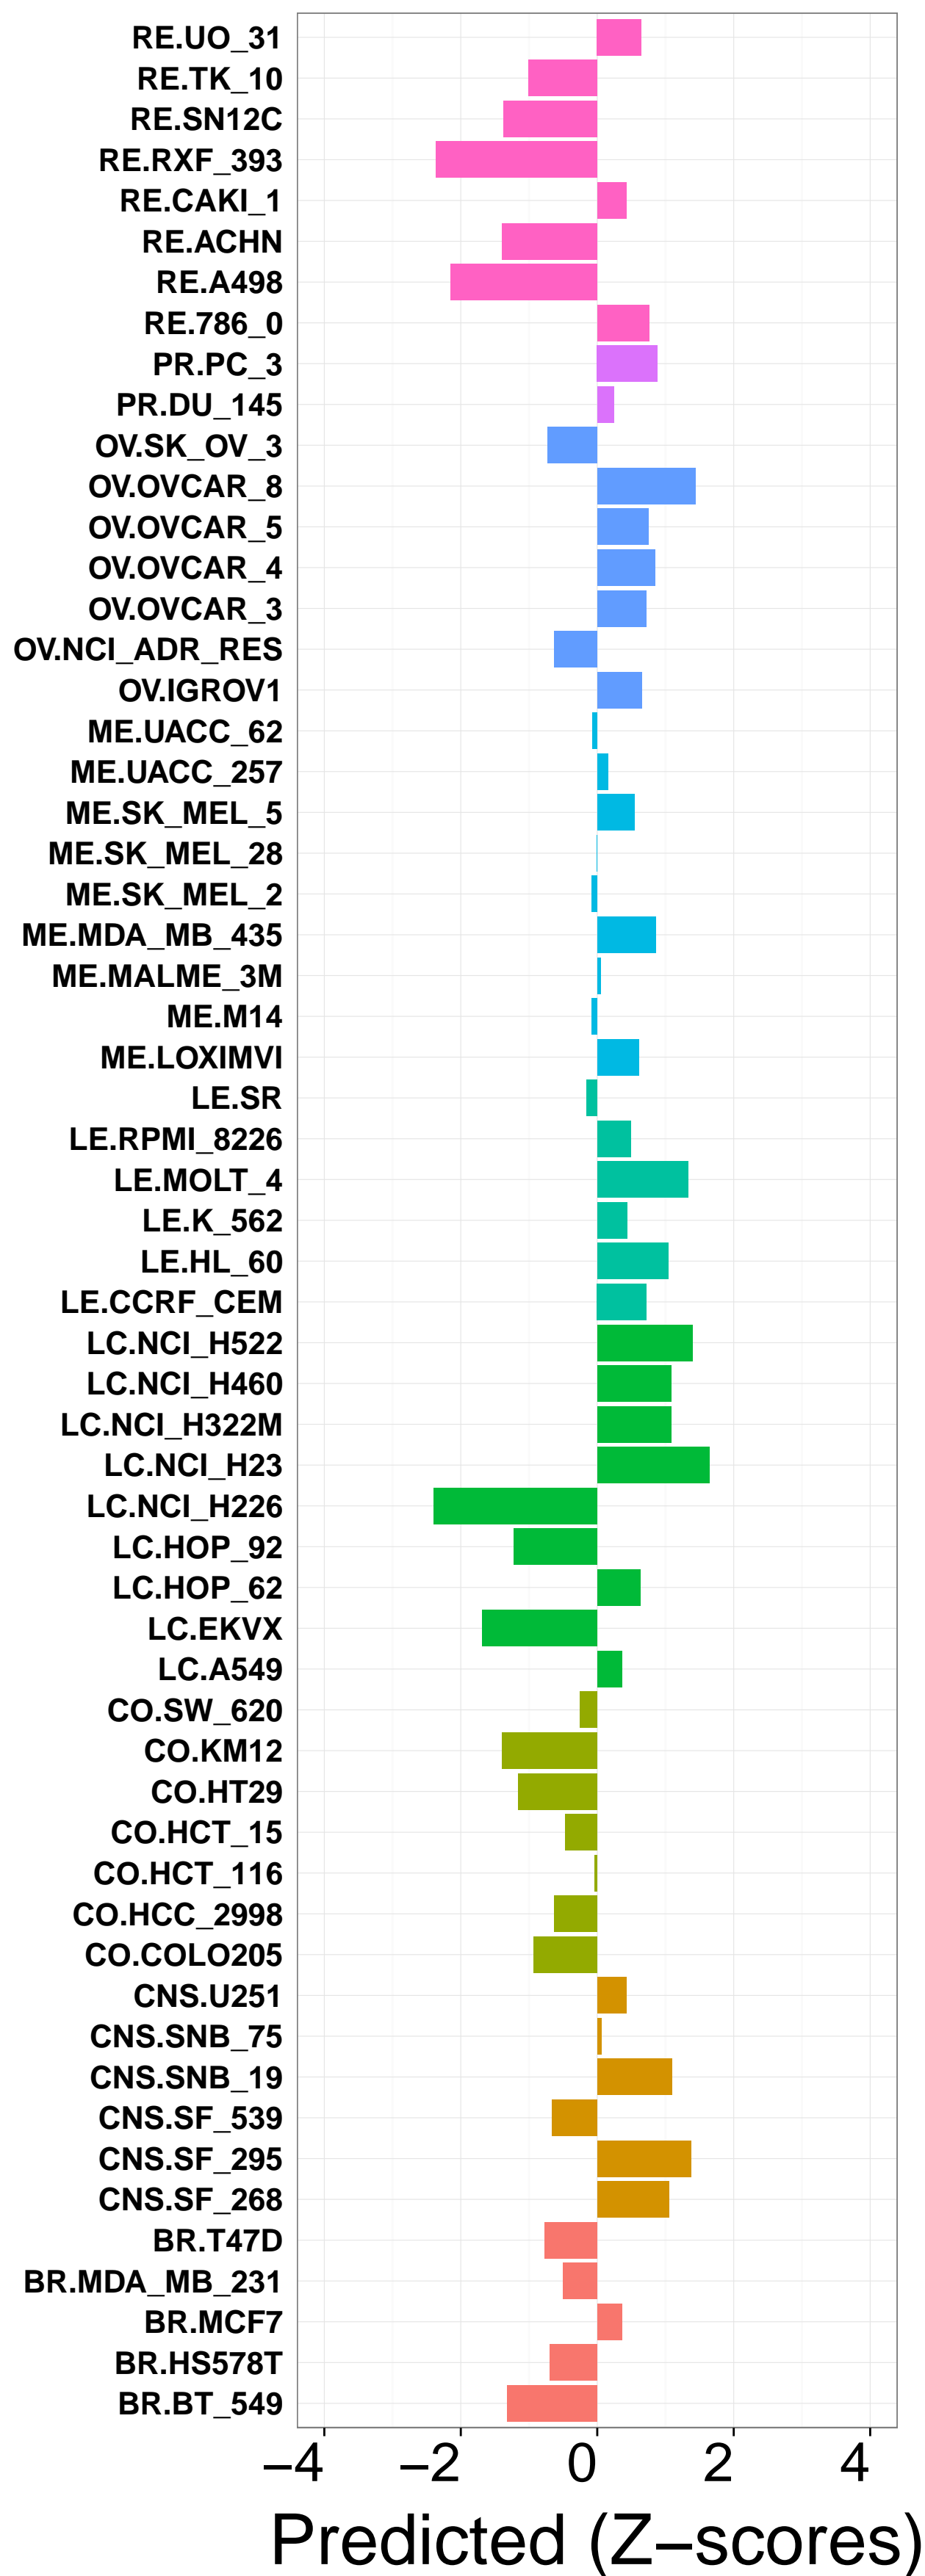

# NSC 741078, selumetinib (LOTO)

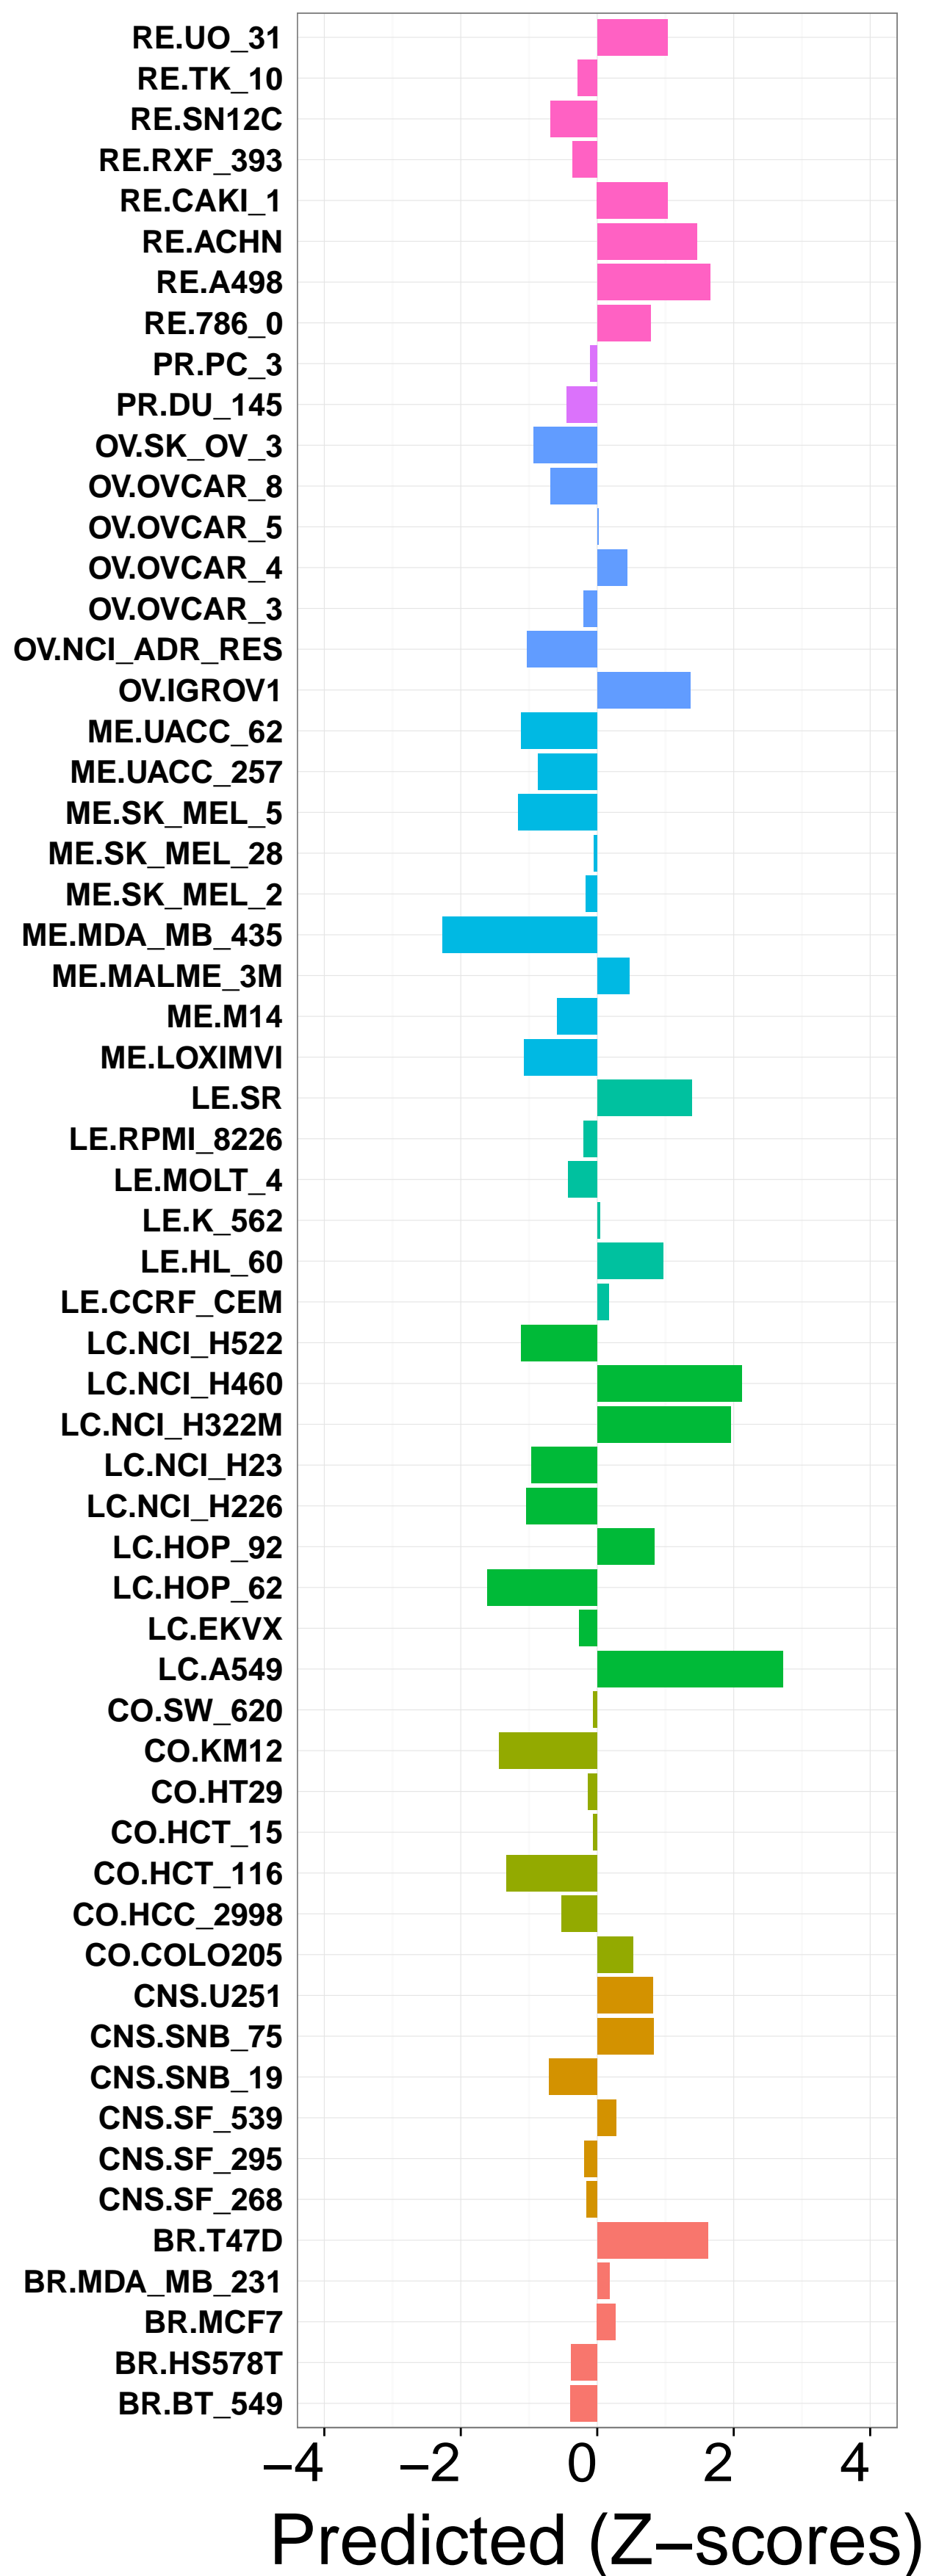

# NSC 745750, Tykerb (LOTO)

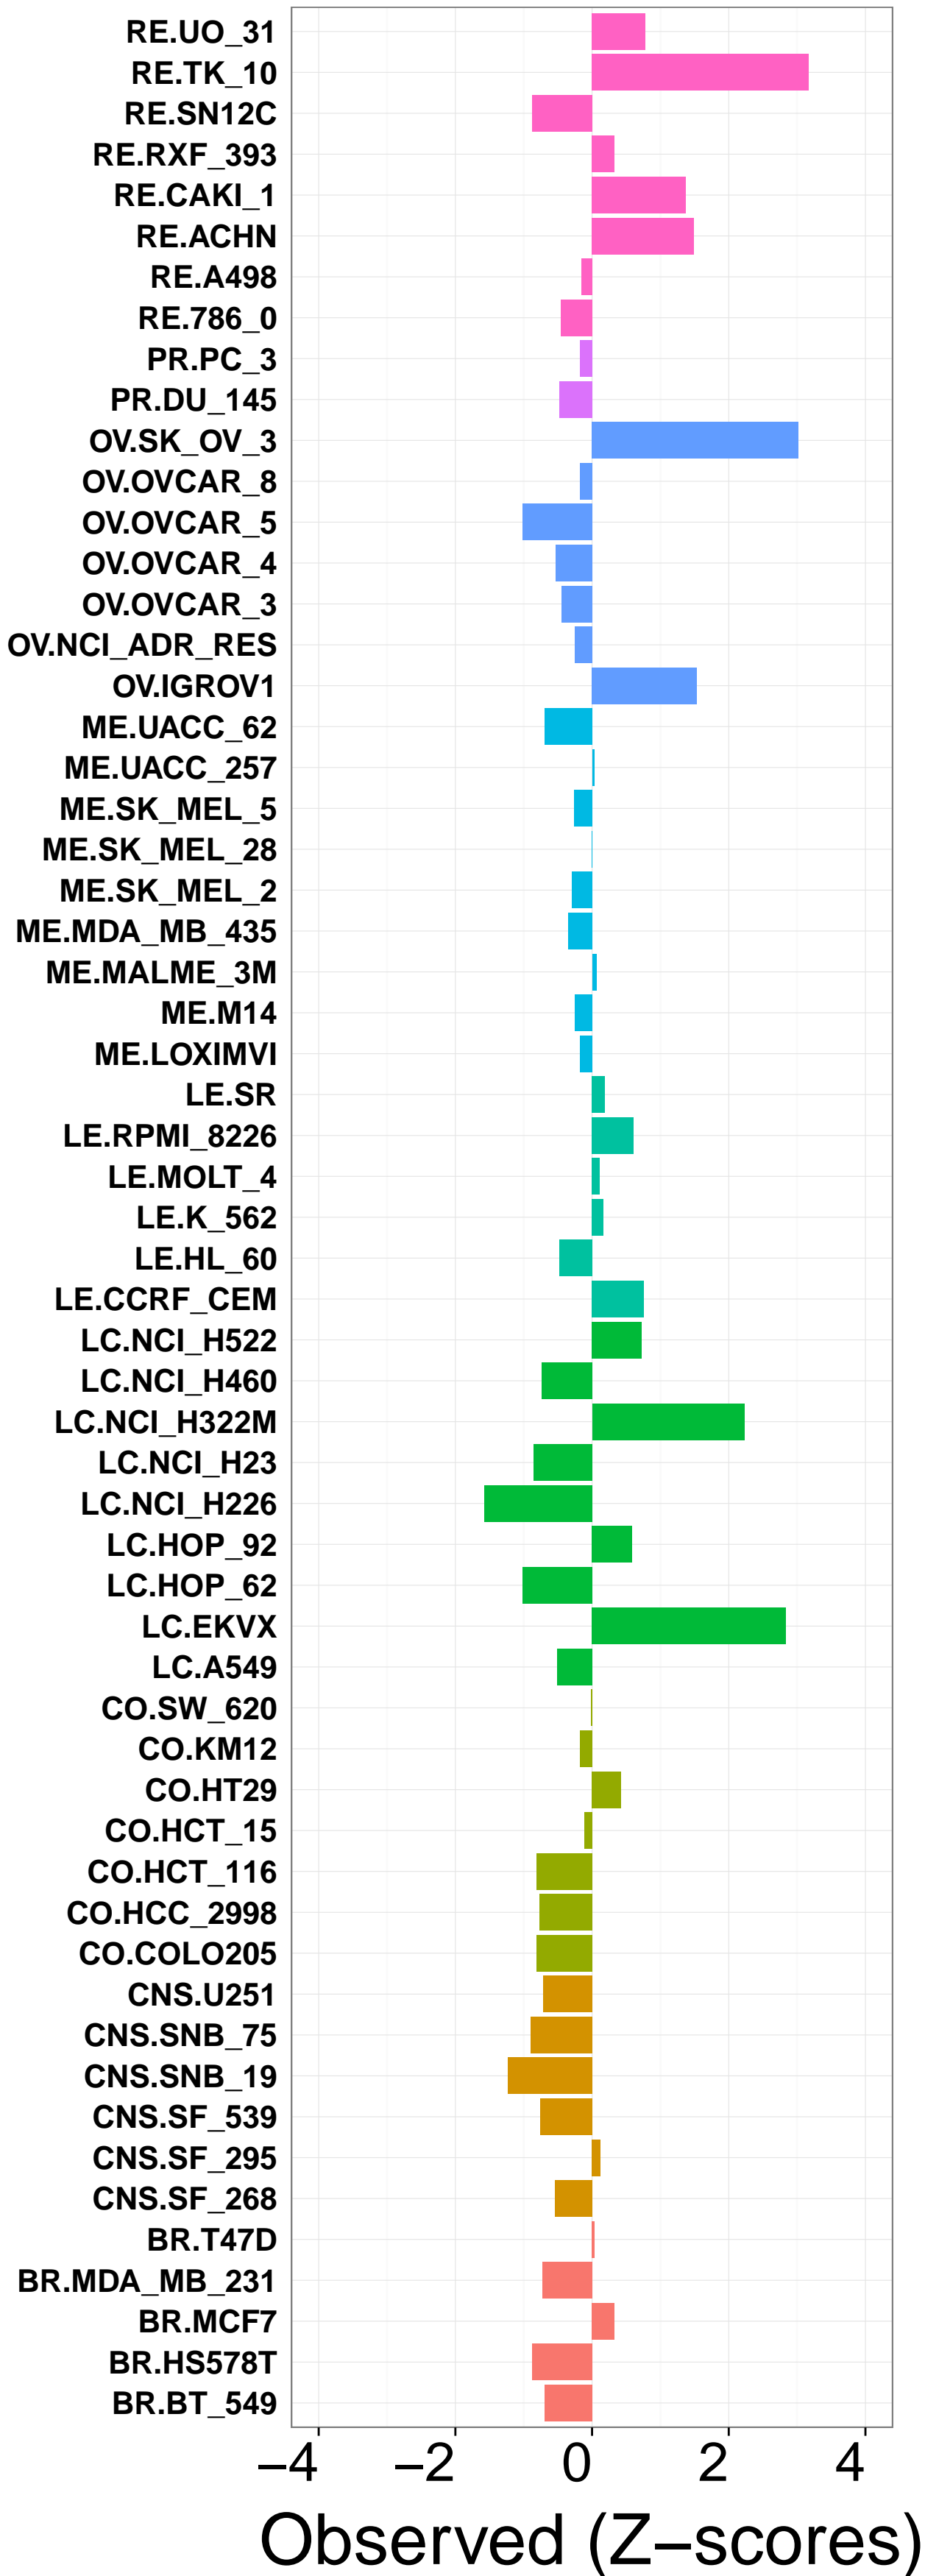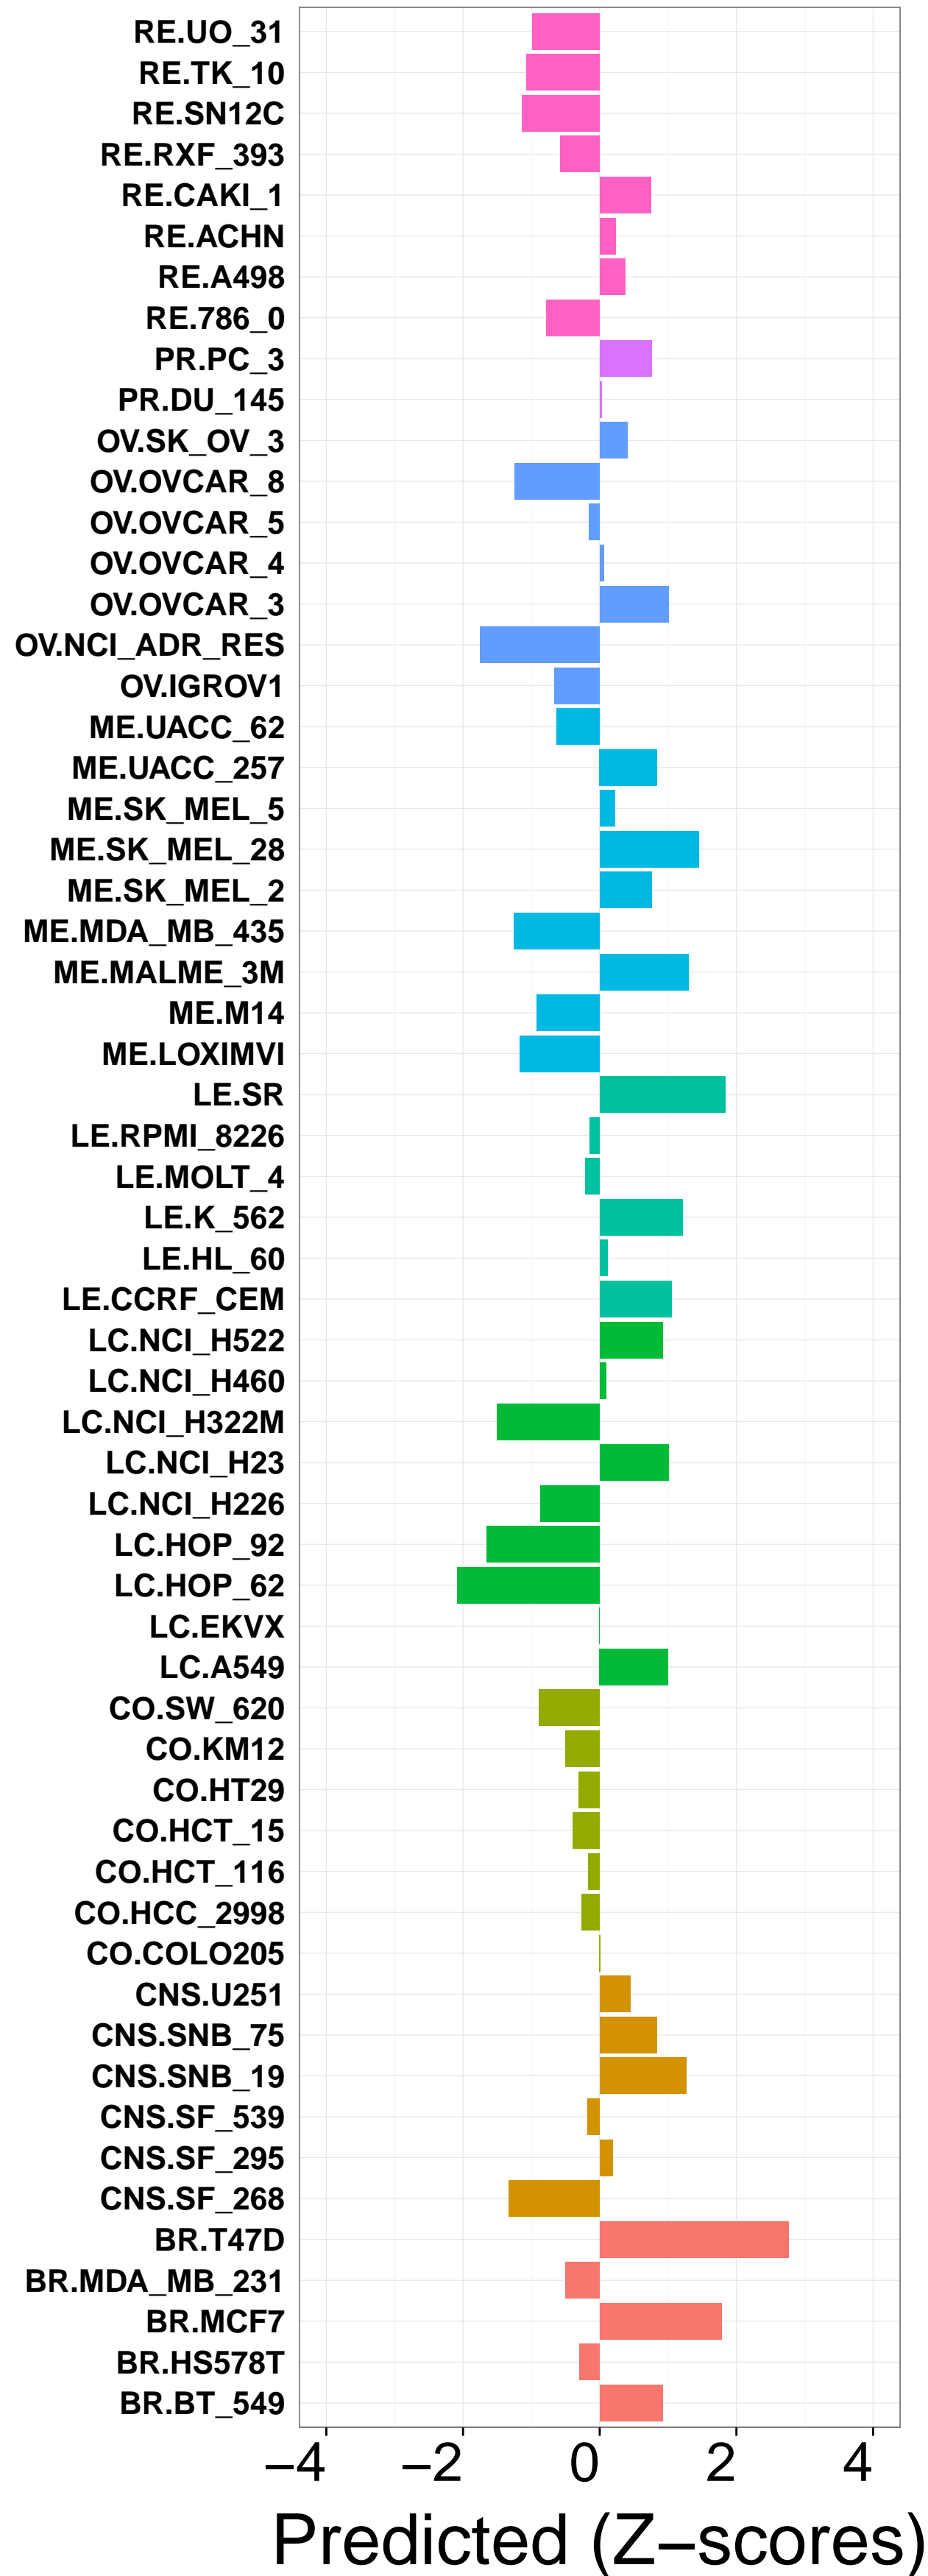

# NSC 749226, (LOTO)

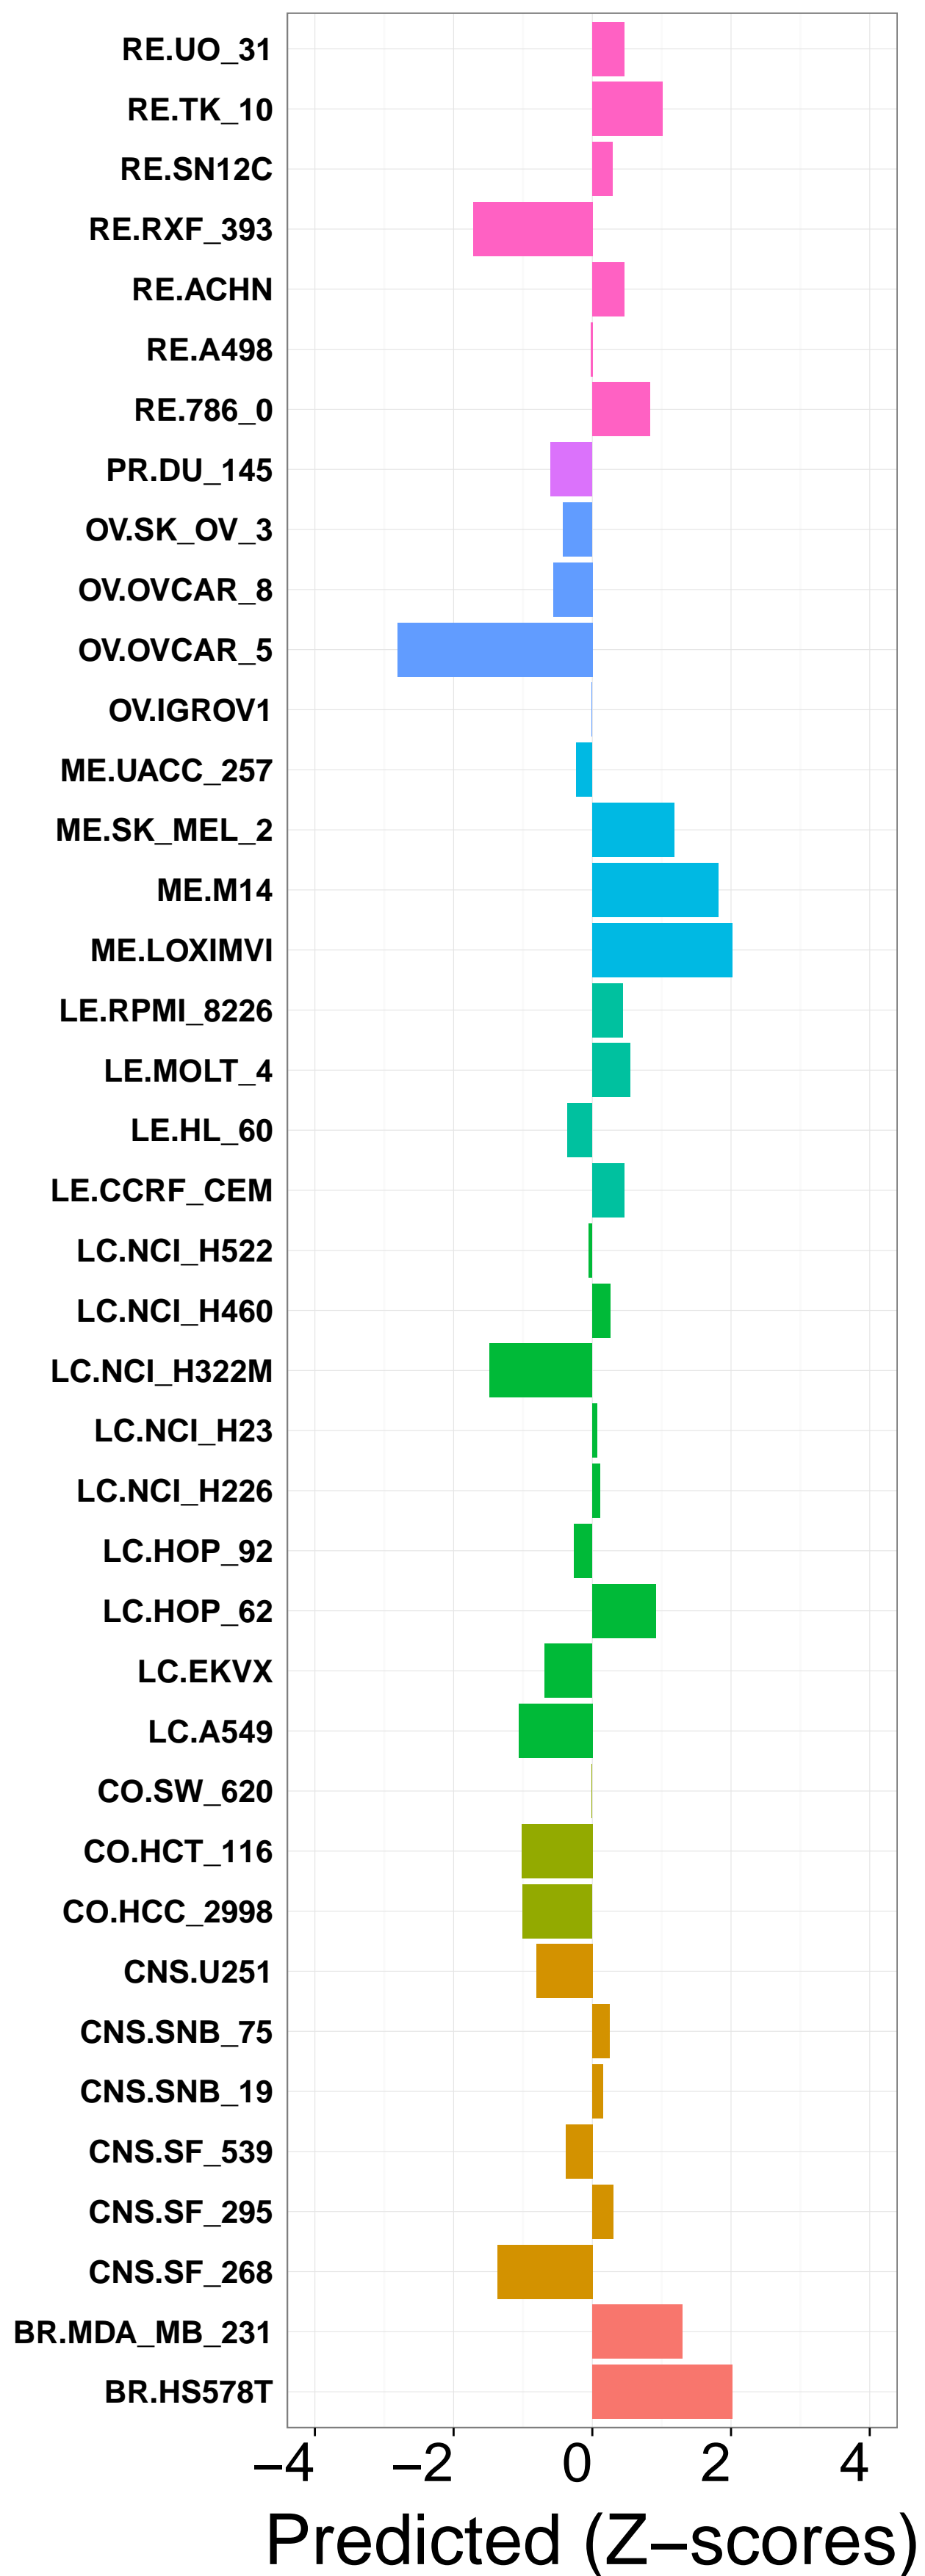

# NSC 755, Mercaptopurine (LOTO)

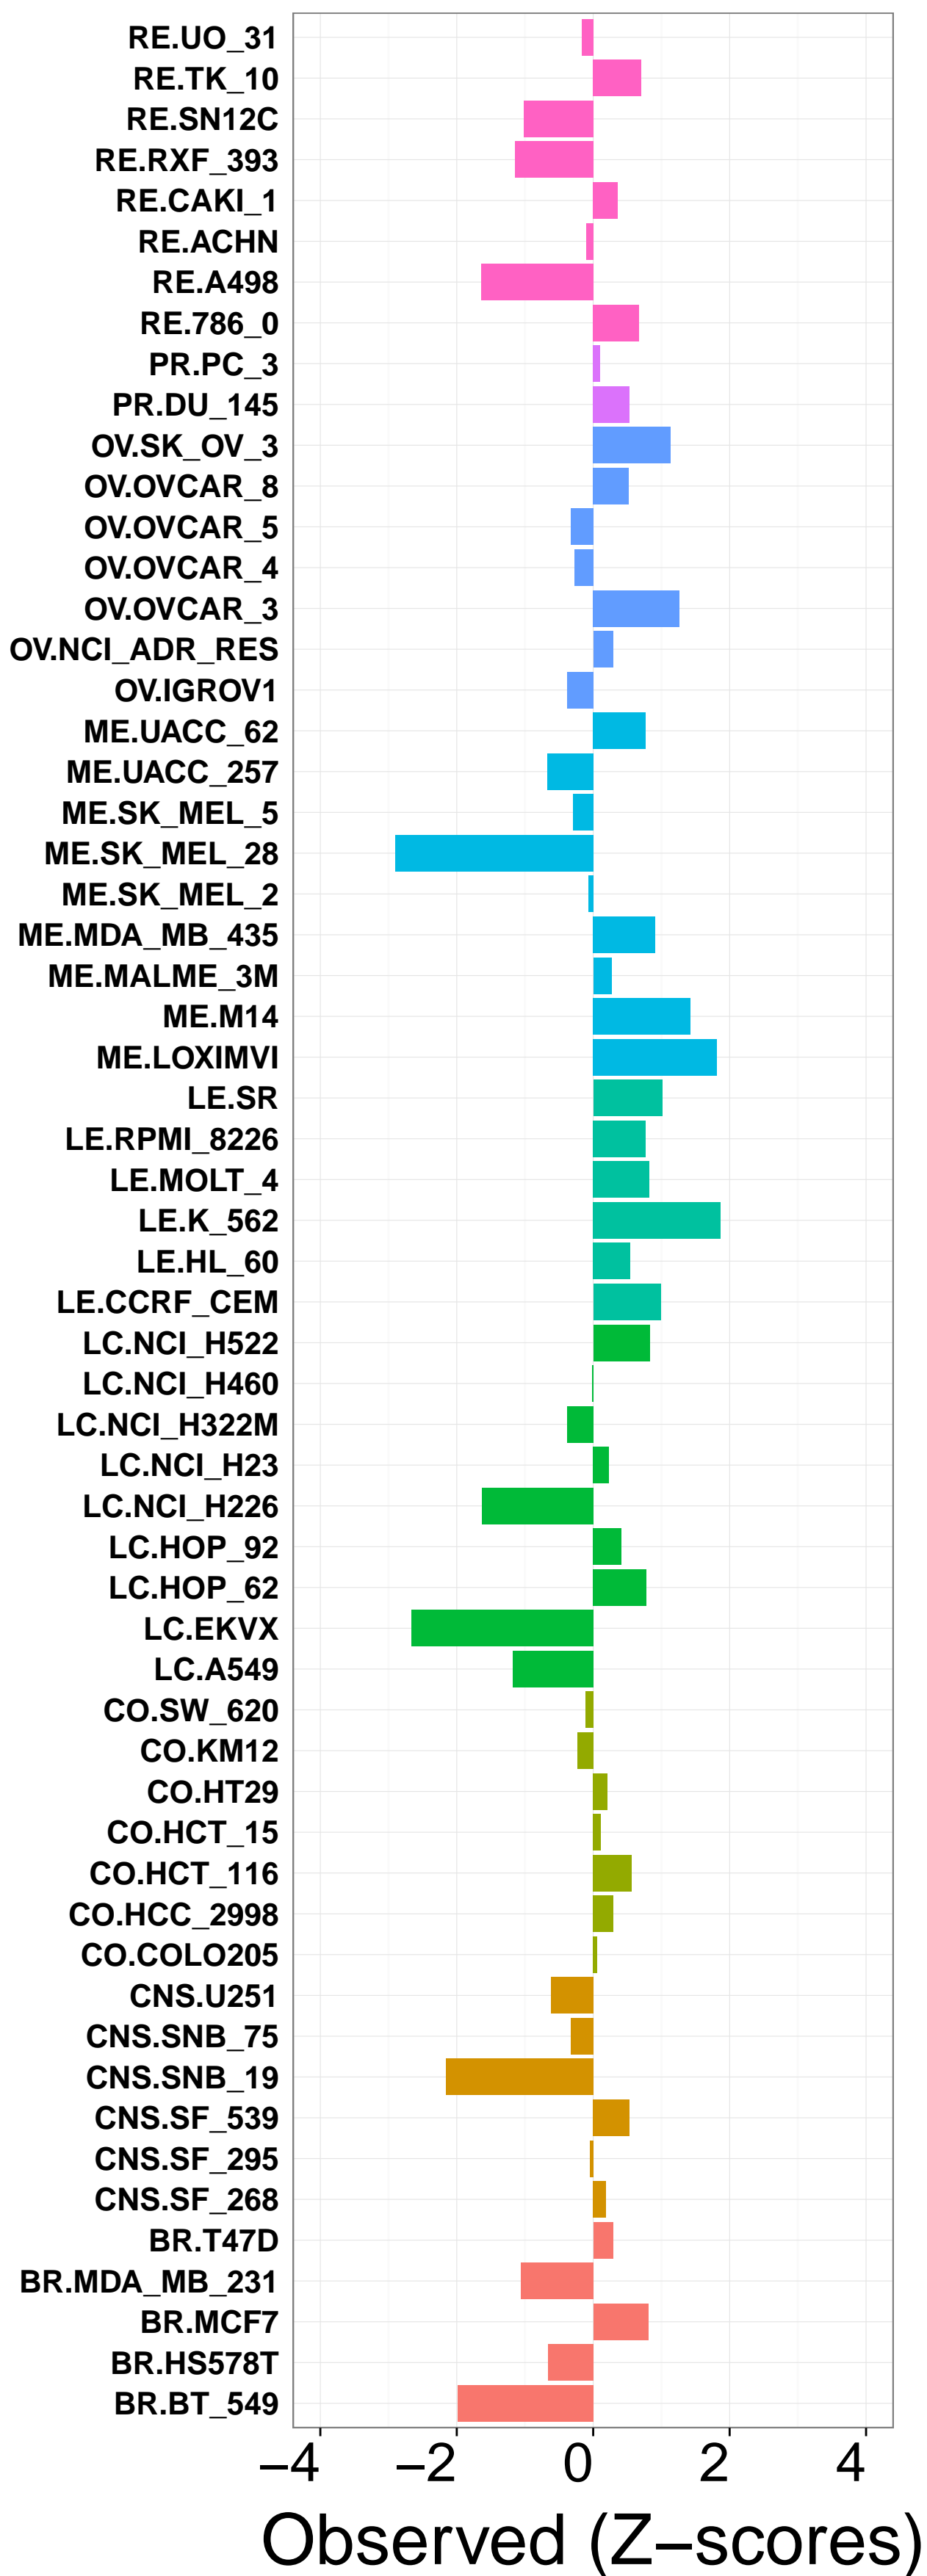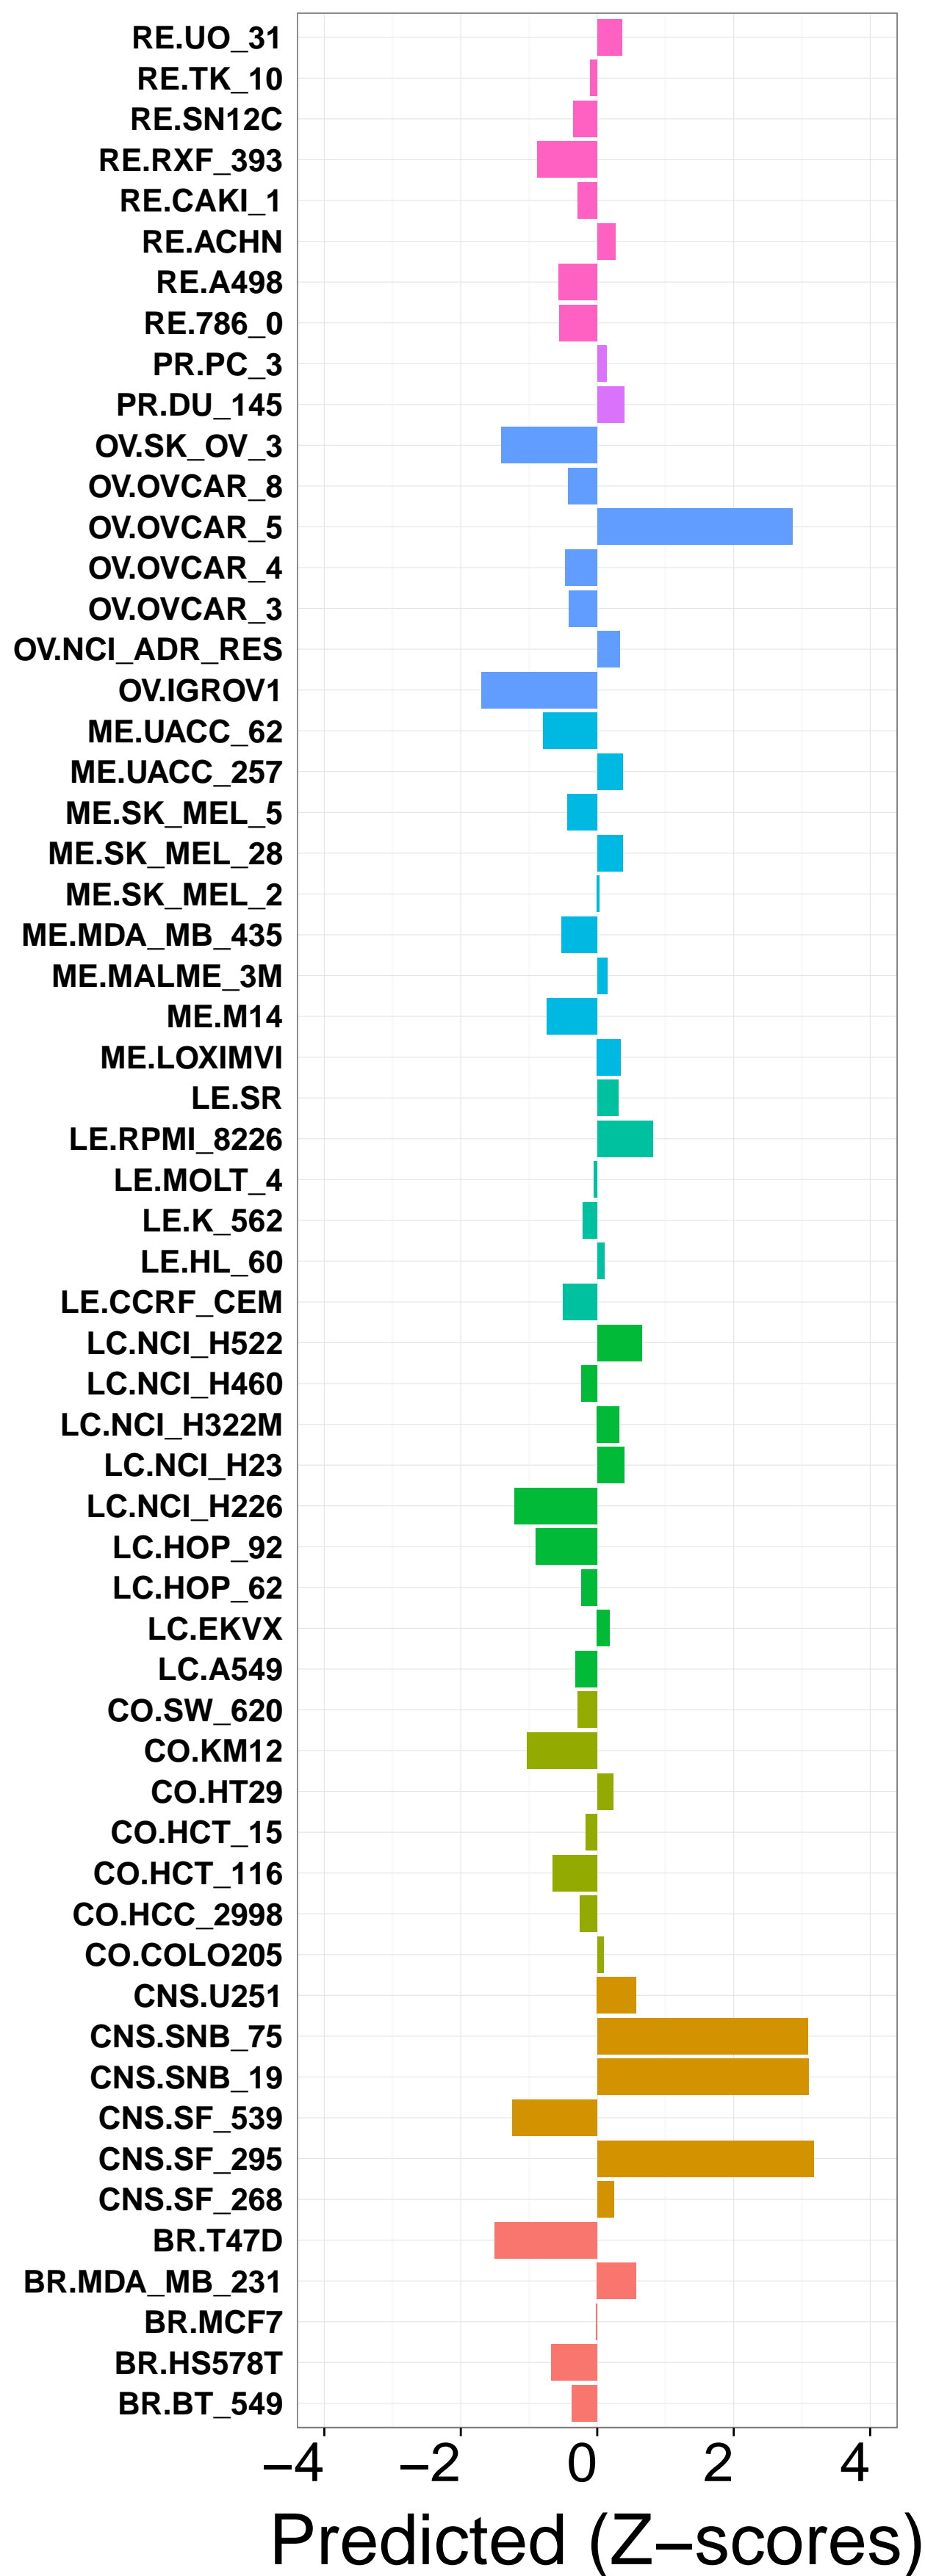



# NSC 762, Mechlorethamine\_Hydrochloride (LOTO)

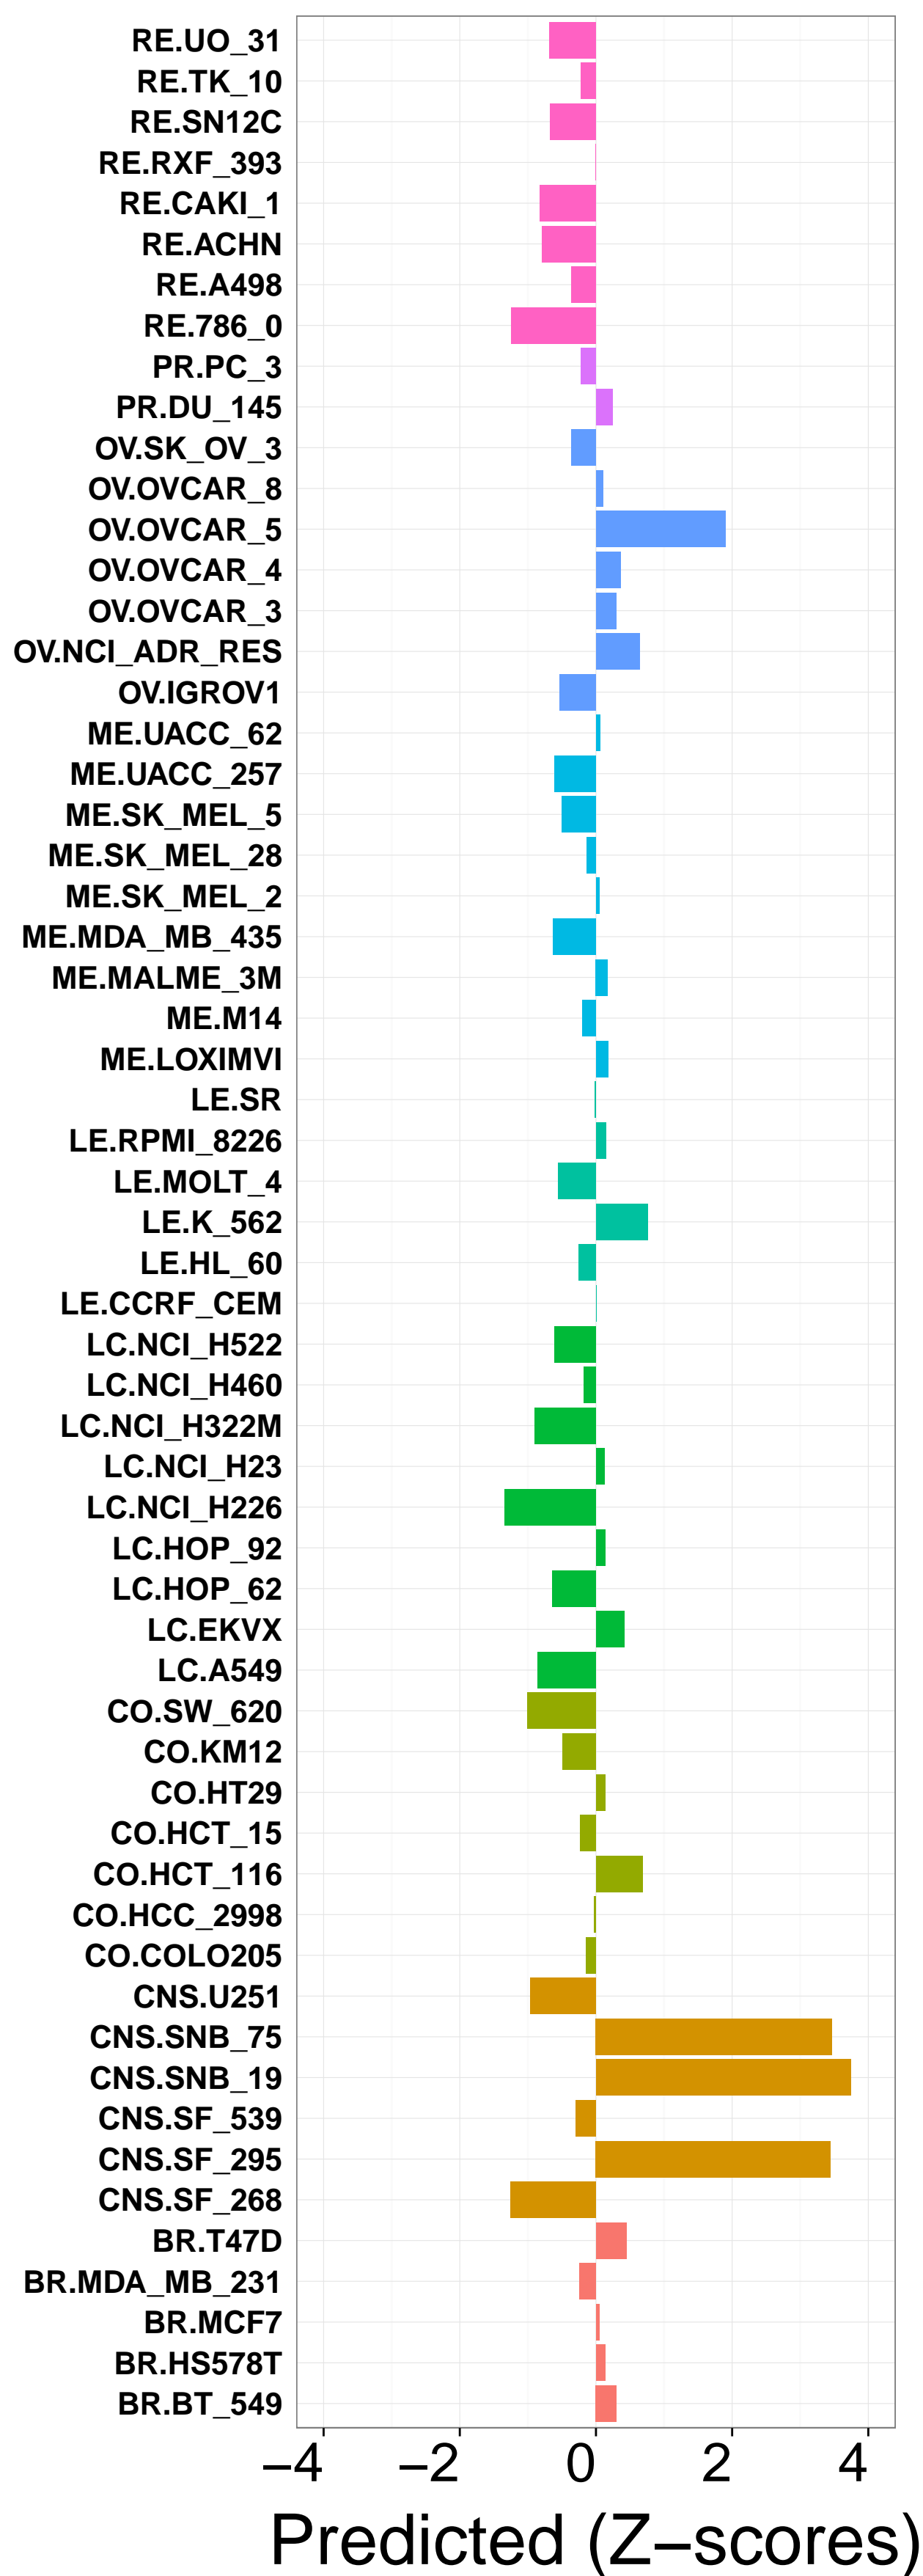

Supplement: supp_btv529_barplots_all.pdf [file supp_btv529_barplots_all.pdf]
